# Supplementary material for: New Aspects of the Synthesis of closo-Dodecaborate Nitrilium Derivatives [B12H11NCR]− (R = n-C3H7, i-C3H7, 4-C6H4CH3, 1-C10H7): Experimental and Theoretical Studies
Source: MDPI journal article supplement (doi:10.3390/inorganics10110196), 2022-11-02
Supplement: s1 [file s1]

Archive with 5 entries (5 files):
- 1.cif
- 1_cifreport.pdf
- 2.cif
- 2_cifreport.pdf
- supplementary_v2.pdf
