# Supplementary material for: New Aspects of the Synthesis of closo-Dodecaborate Nitrilium Derivatives [B12H11NCR]− (R = n-C3H7, i-C3H7, 4-C6H4CH3, 1-C10H7): Experimental and Theoretical Studies
Source: MDPI journal article supplement (doi:10.3390/inorganics10110196), 2022-11-02
Supplement: s1 [file s1]

**New aspects of the synthesis of *closo*-dodecaborate nitrilium derivatives [B<sub>12</sub>H<sub>11</sub>NCR]<sup>−</sup> (R = *n*-C<sub>3</sub>H<sub>7</sub>, *i*-C<sub>3</sub>H<sub>7</sub>, 4-C<sub>6</sub>H<sub>4</sub>CH<sub>3</sub>, 1-C<sub>10</sub>H<sub>7</sub>): experimental and theoretical studies**

Alexey V. Nelyubin<sup>1</sup>, Nikita A. Selivanov<sup>1</sup>, Alexander Yu. Bykov<sup>1</sup>, Ilya N. Klyukin<sup>1</sup>, Alexander S. Novikov<sup>2,3</sup>, Andrey P. Zhdanov<sup>1</sup>, Alexey S. Kubasov<sup>1</sup>, Konstantin Yu. Zhizhin<sup>1,\*</sup> and Nikolay T. Kuznetsov<sup>1</sup>

1 Kurnakov Institute of General and Inorganic Chemistry, Russian Academy of Sciences, 119991, Leninskii pr. 31, Moscow, Russian Federation

2 Saint Petersburg State University, Institute of Chemistry, 199034, Universitetskaya Nab. 7-9, Saint Petersburg, Russian Federation

3 Peoples' Friendship University of Russia (RUDN University), Research Institute of Chemistry, Miklukho-Maklaya st. 6, 117198, Moscow, Russian Federation

Correspondence: zhizhin@igic.ras.ru; Tel.: +7-926-727-0139 (KYZ)

## 1. Spectral data for synthesised compounds.

Figure S1:  $^{11}\text{B}\{^1\text{H}\}$  NMR spectrum  $(\text{Bu}_4\text{N})[\text{B}_{12}\text{H}_{11}(\text{NC}^n\text{C}_3\text{H}_7)]$  **1a**

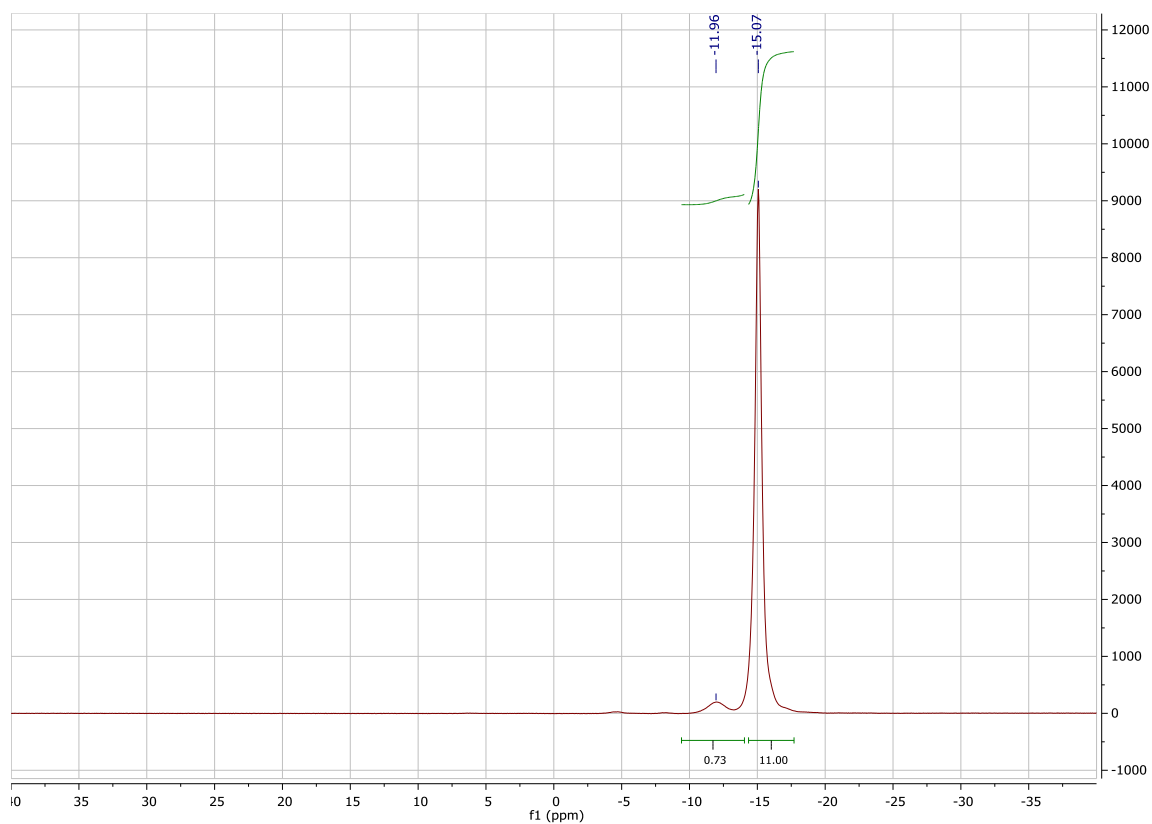

Figure S2:  $^1\text{H}$  NMR spectrum  $(\text{Bu}_4\text{N})[\text{B}_{12}\text{H}_{11}(\text{NC}^n\text{C}_3\text{H}_7)]$  **1a**

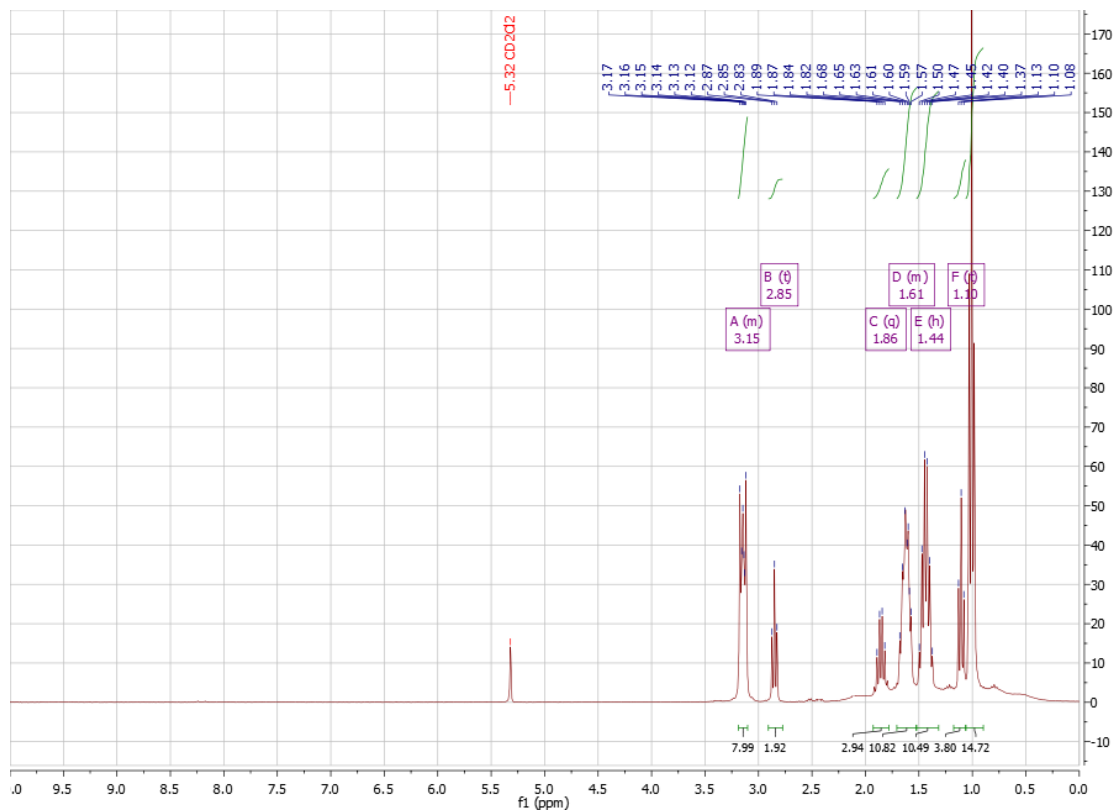

**Figure S3:  $^{13}\text{C}$  NMR spectrum ( $\text{Bu}_4\text{N}$ )[ $\text{B}_{12}\text{H}_{11}(\text{NC}^n\text{C}_3\text{H}_7)$ ] 1a**

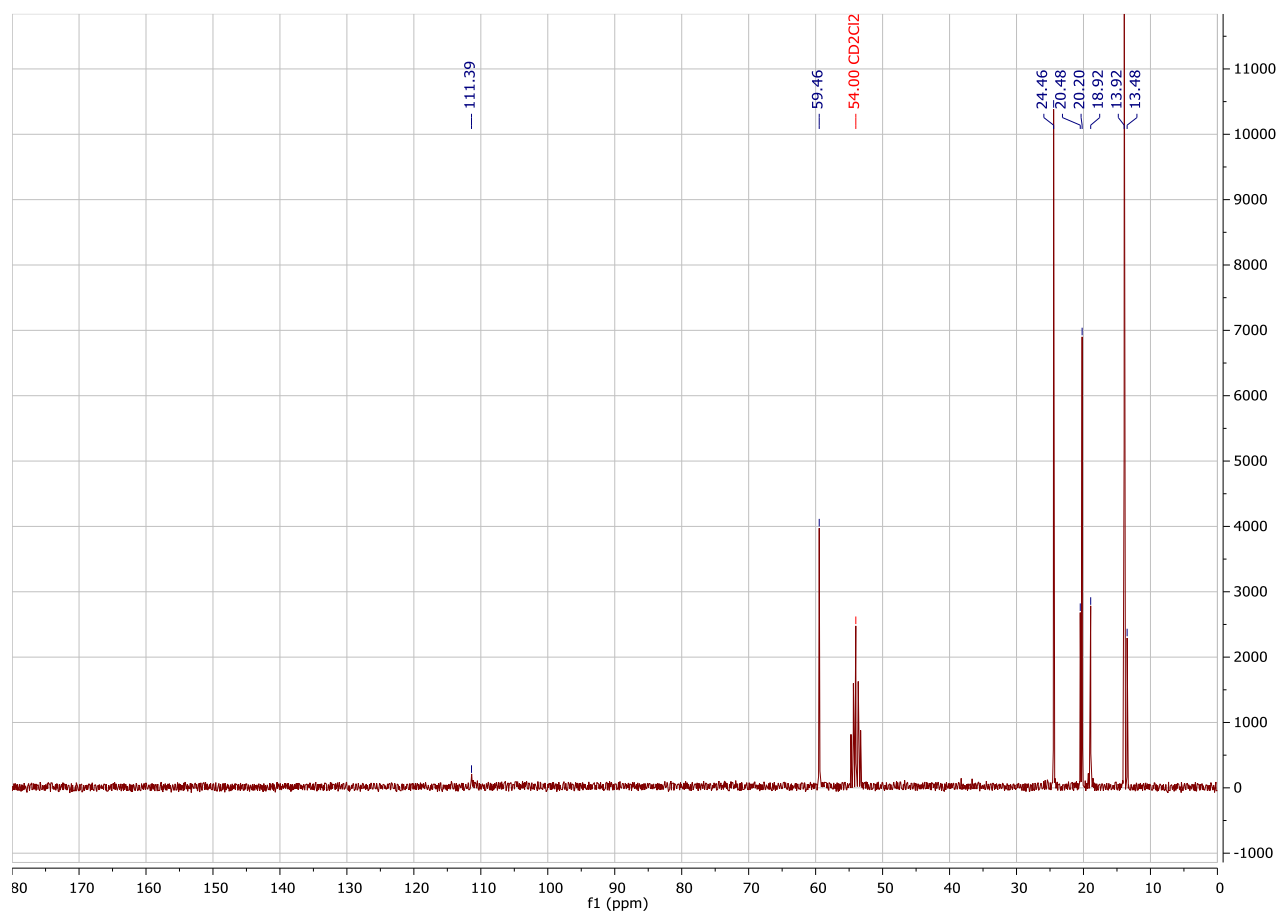

**Figure S4: ESI-MS spectrum ( $\text{Bu}_4\text{N}$ )[ $\text{B}_{12}\text{H}_{11}(\text{NC}^n\text{C}_3\text{H}_7)$ ] (negative area) 1a.**

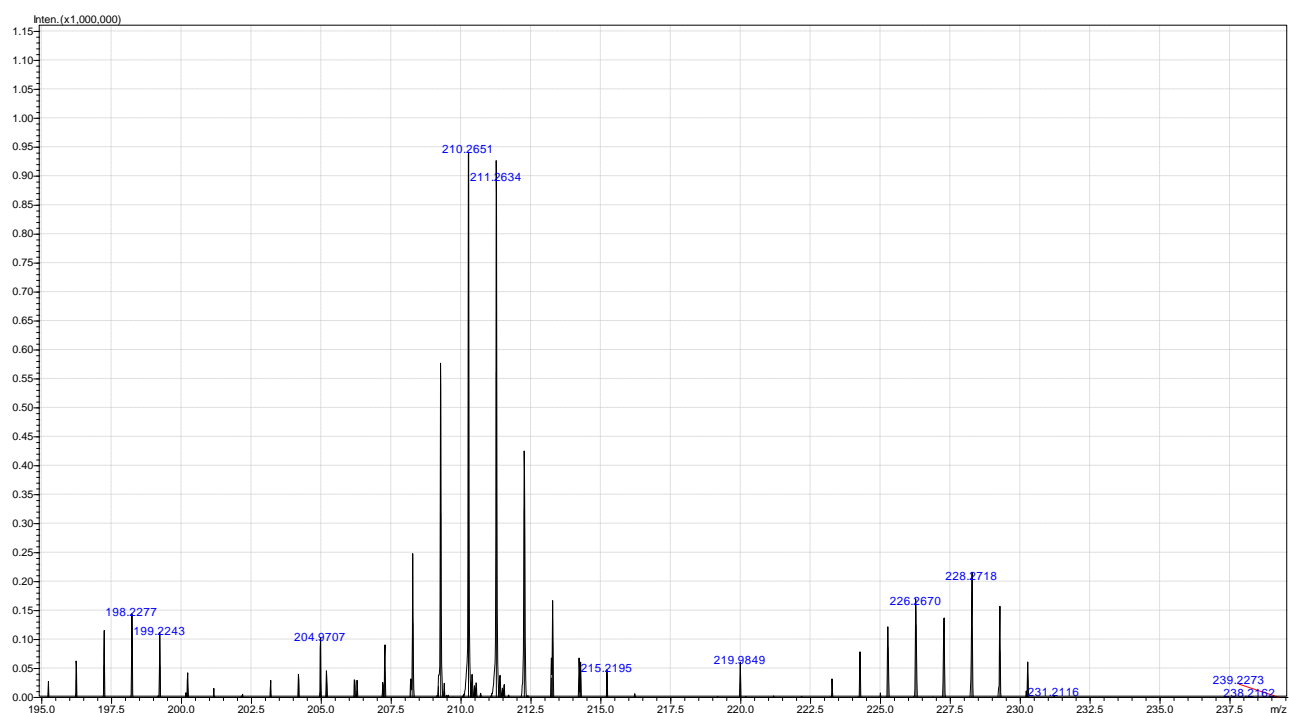

**Figure S5:  $^{11}\text{B}\{^1\text{H}\}$  NMR spectrum  $(\text{Bu}_4\text{N})[\text{B}_{12}\text{H}_{11}(\text{NC}^i\text{C}_3\text{H}_7)]$  **1b****

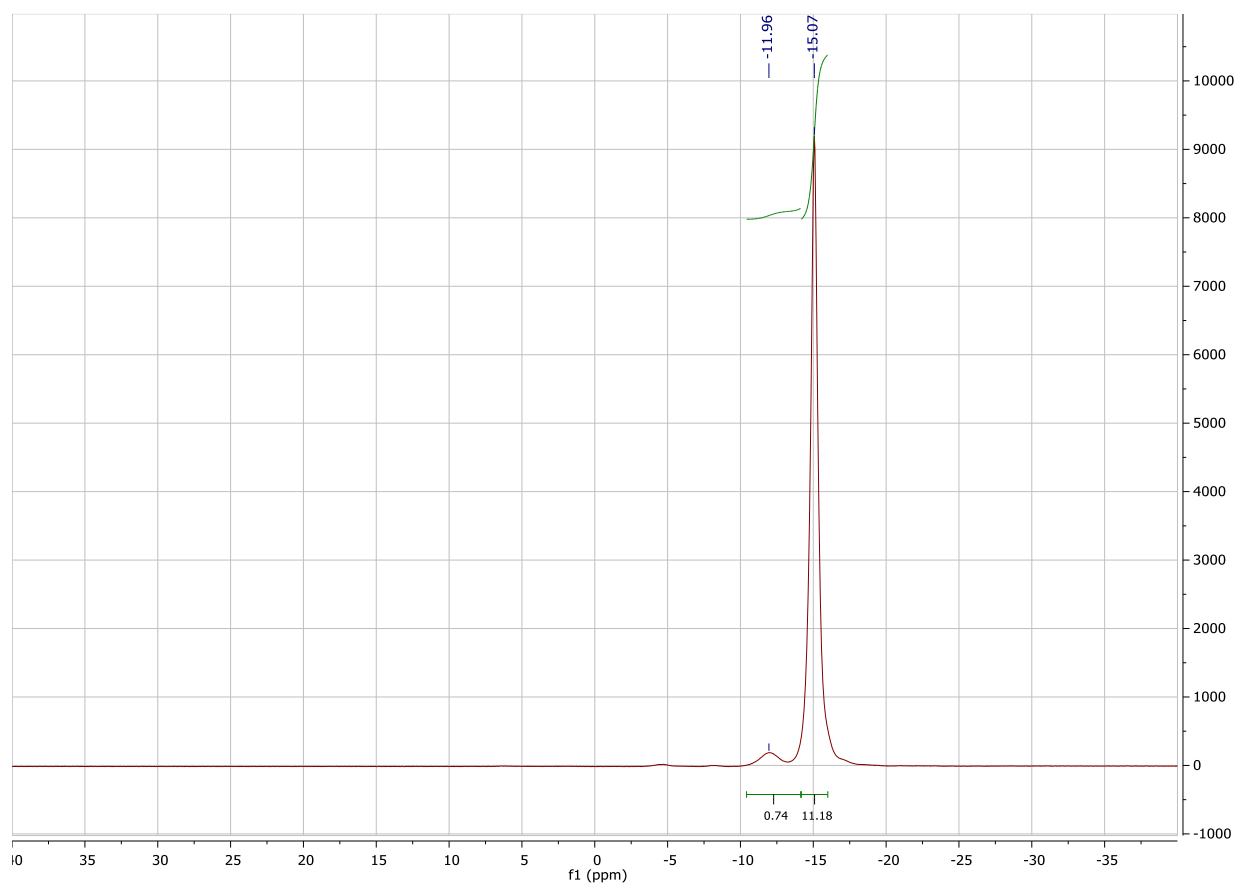

**Figure S6:  $^1\text{H}$  NMR spectrum  $(\text{Bu}_4\text{N})[\text{B}_{12}\text{H}_{11}(\text{NC}^i\text{C}_3\text{H}_7)]$  **1b**.**

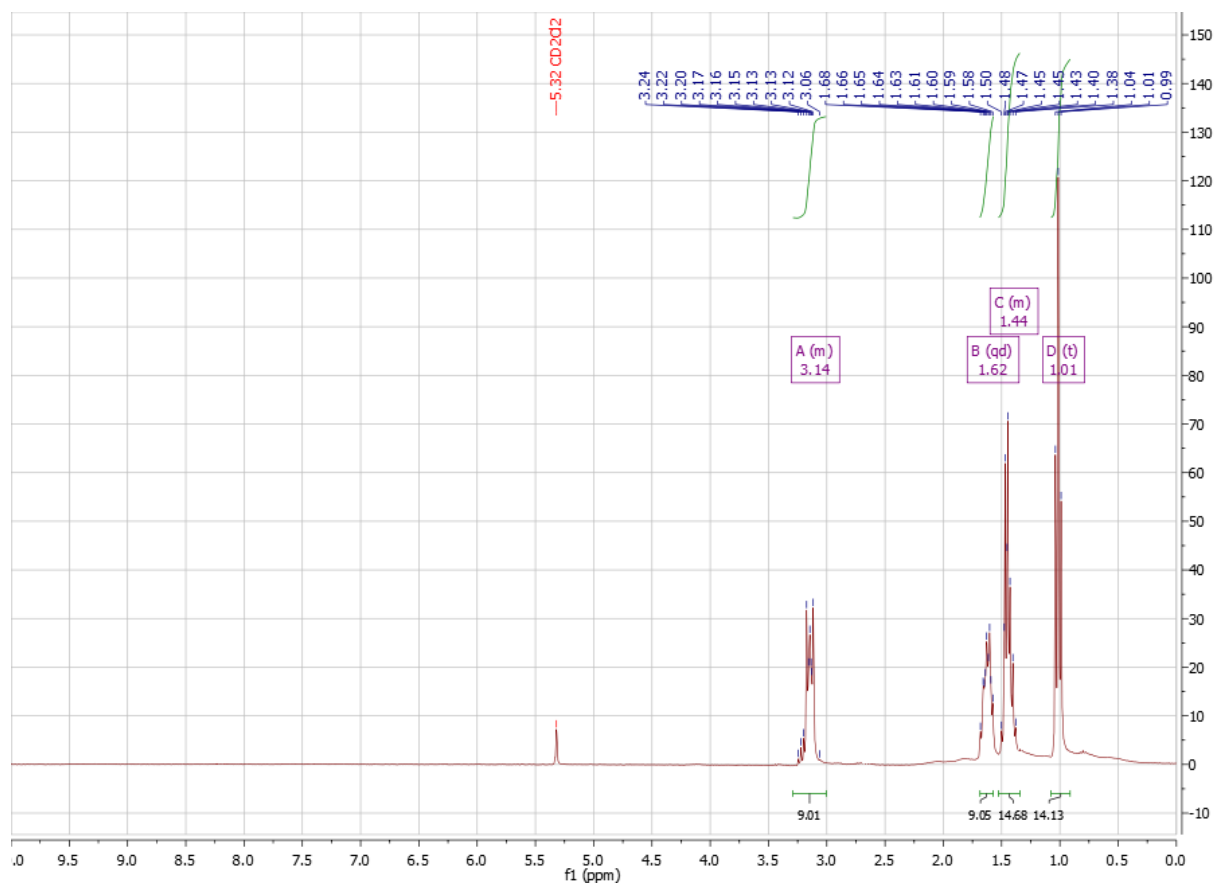

**Figure S7:  $^{13}\text{C}$  NMR spectrum ( $\text{Bu}_4\text{N}$ )[ $\text{B}_{12}\text{H}_{11}(\text{NC}^i\text{C}_3\text{H}_7)$ ] 1b**

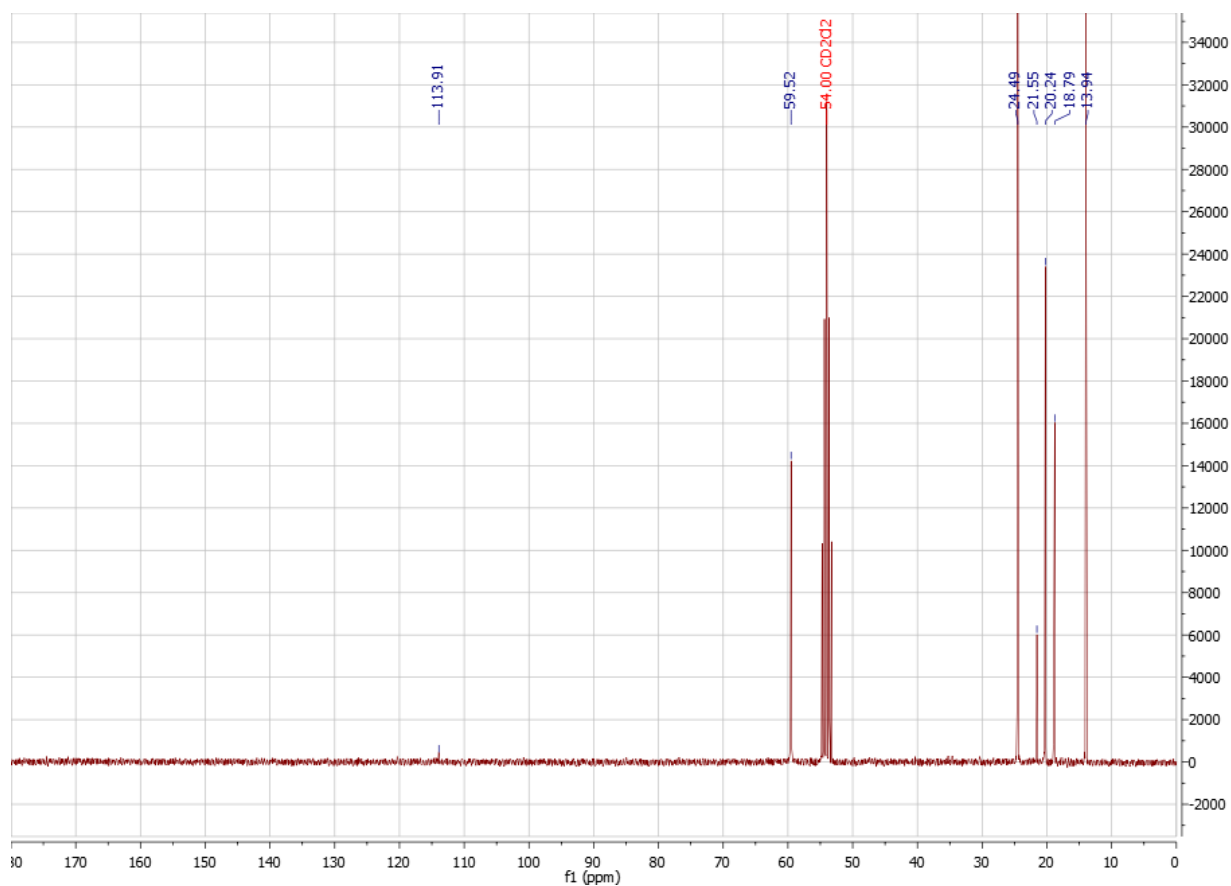

**Figure S8: ESI-MS spectrum ( $\text{Bu}_4\text{N}$ )[ $\text{B}_{12}\text{H}_{11}(\text{NC}^i\text{C}_3\text{H}_7)$ ] (negative area) 1b.**

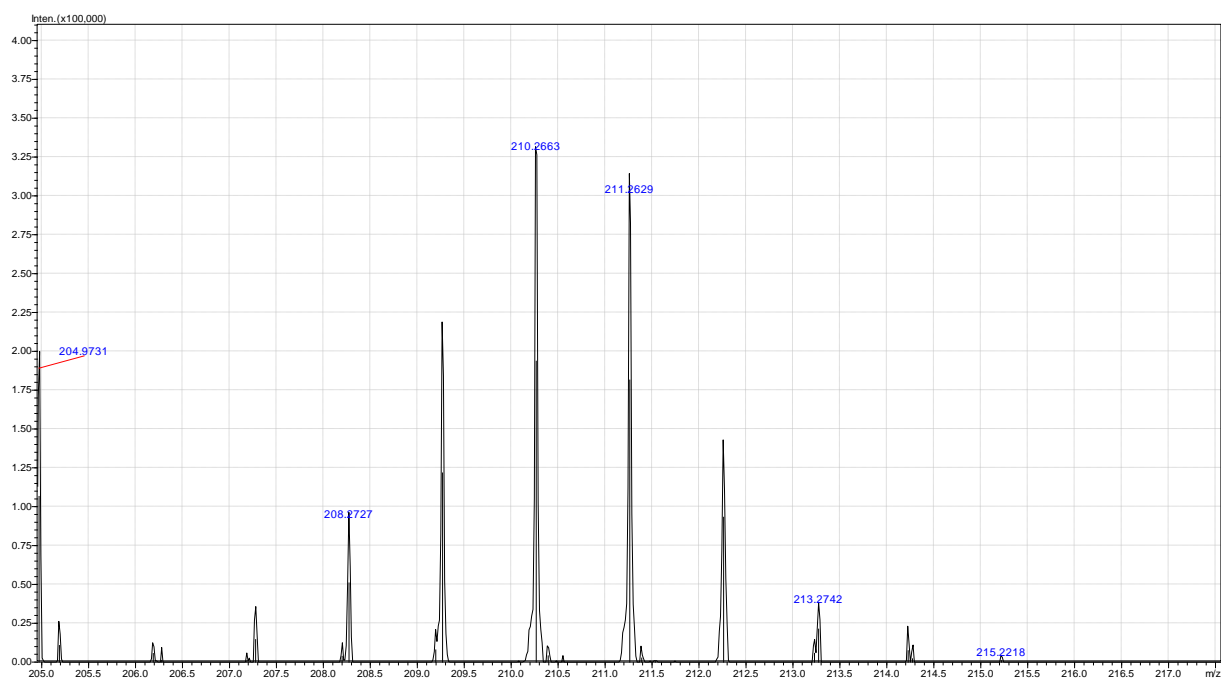

**Figure S9:  $^{11}\text{B}\{^1\text{H}\}$  NMR spectrum  $(\text{Bu}_4\text{N})[\text{B}_{12}\text{H}_{11}(\text{NCC}_6\text{H}_4\text{CH}_3)]$  2a**

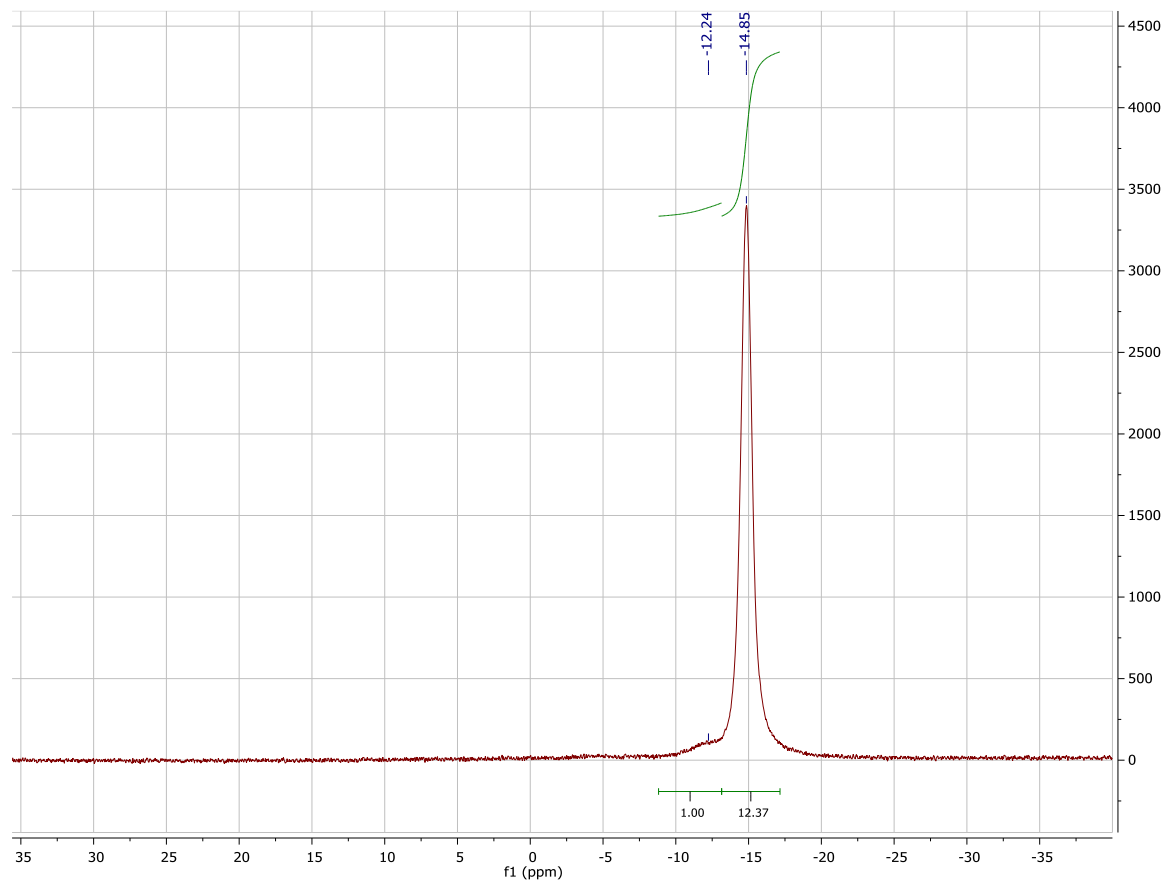

**Figure S10:  $^1\text{H}$  NMR spectrum  $(\text{Bu}_4\text{N})[\text{B}_{12}\text{H}_{11}(\text{NCC}_6\text{H}_4\text{CH}_3)]$  2a**

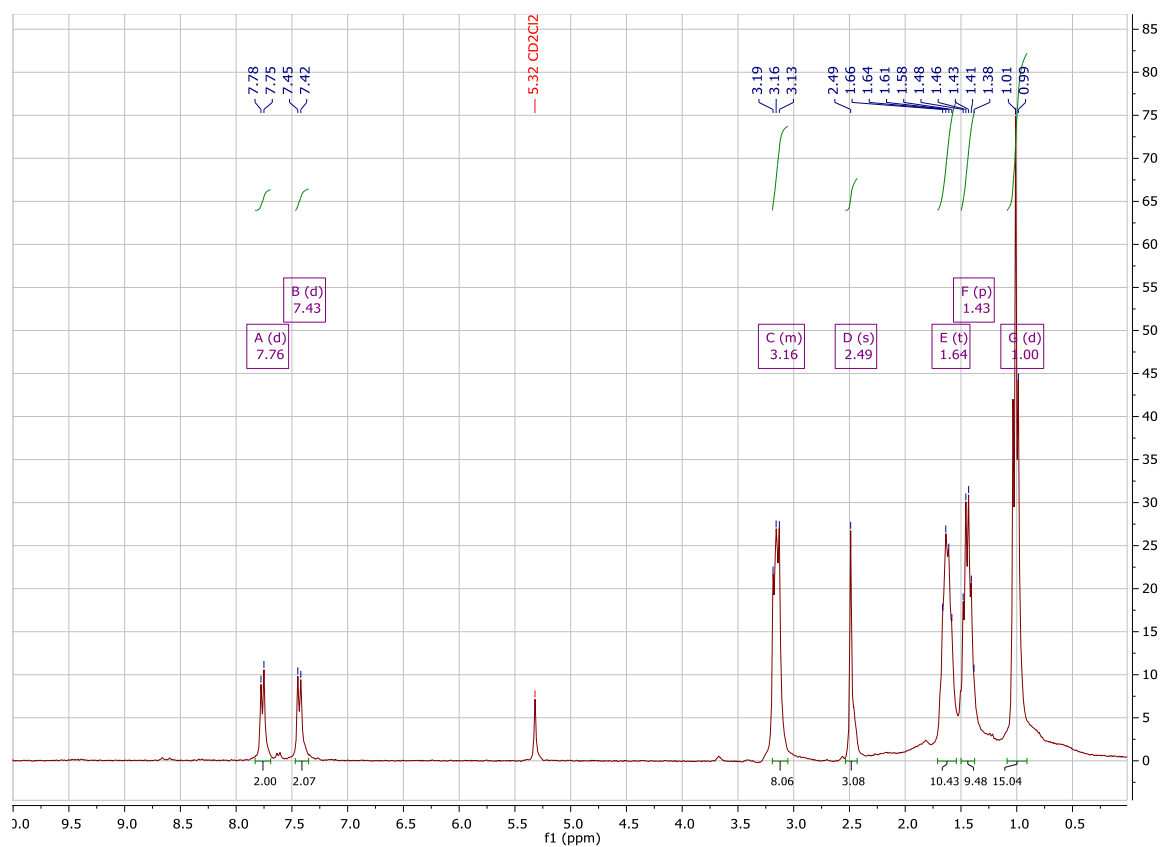

**Figure S11:**  $^{13}\text{C}$  NMR spectrum  $(\text{Bu}_4\text{N})[\text{B}_{12}\text{H}_{11}(\text{NCC}_6\text{H}_4\text{CH}_3)]$  **2a**

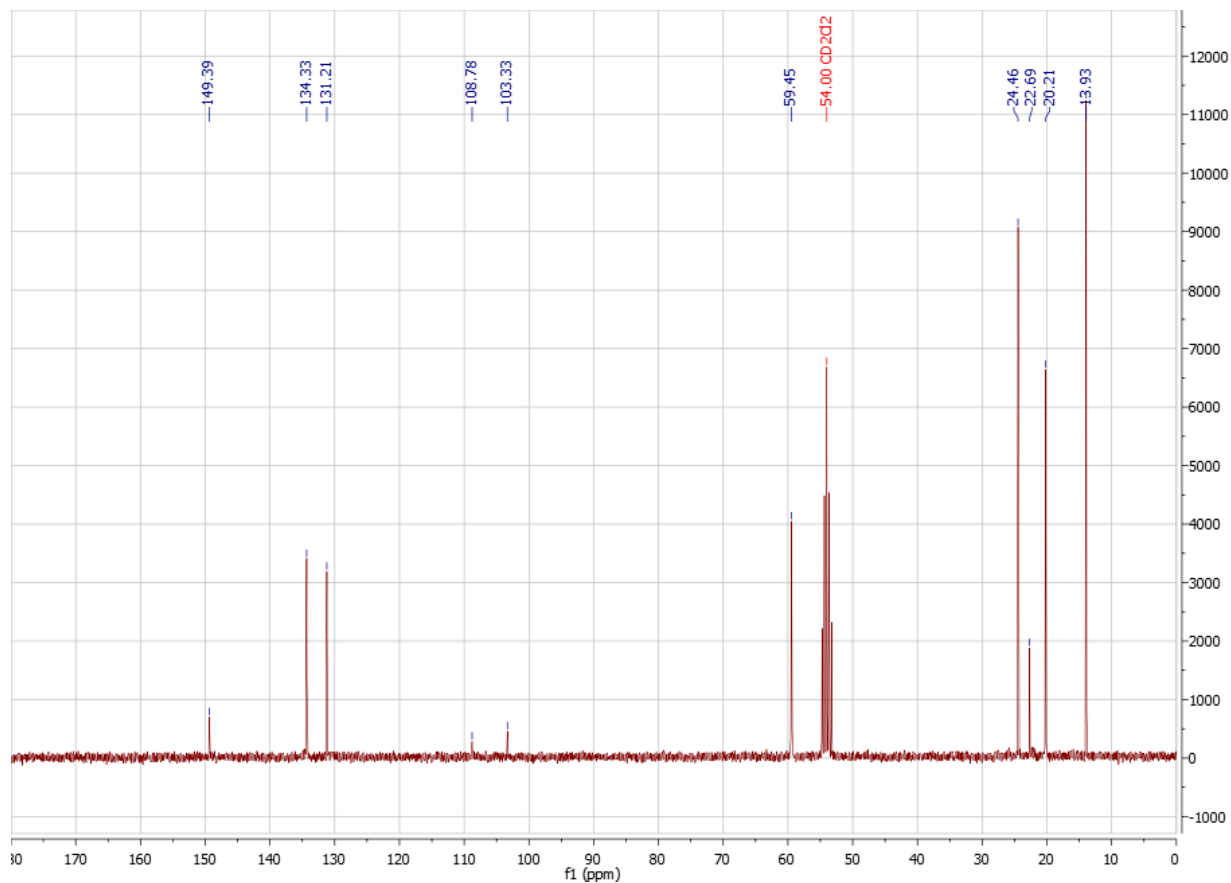

**Figure S12:** ESI-MS spectrum  $(\text{Bu}_4\text{N})[\text{B}_{12}\text{H}_{11}(\text{NCC}_6\text{H}_4\text{CH}_3)]$  (negative area) **2a**.

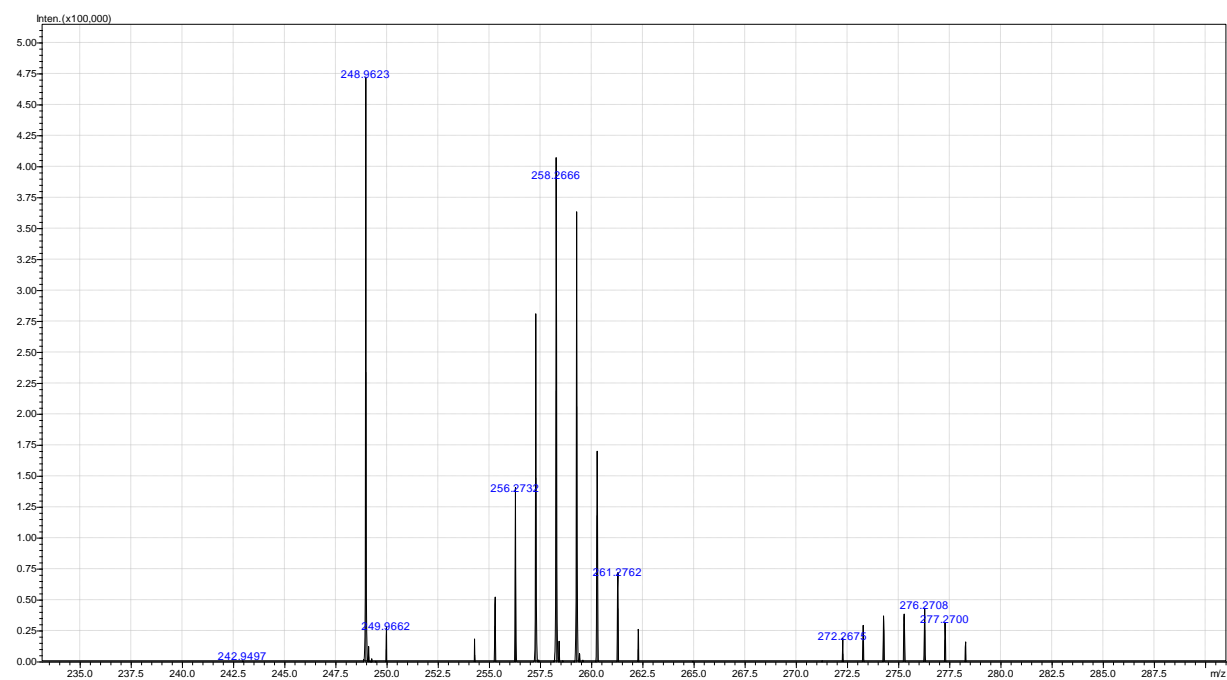

**Figure S13:**  $^{11}\text{B}\{^1\text{H}\}$  NMR spectrum  $(\text{Bu}_4\text{N})[\text{B}_{12}\text{H}_{11}(\text{NCC}_{10}\text{H}_7)]$  **2b**

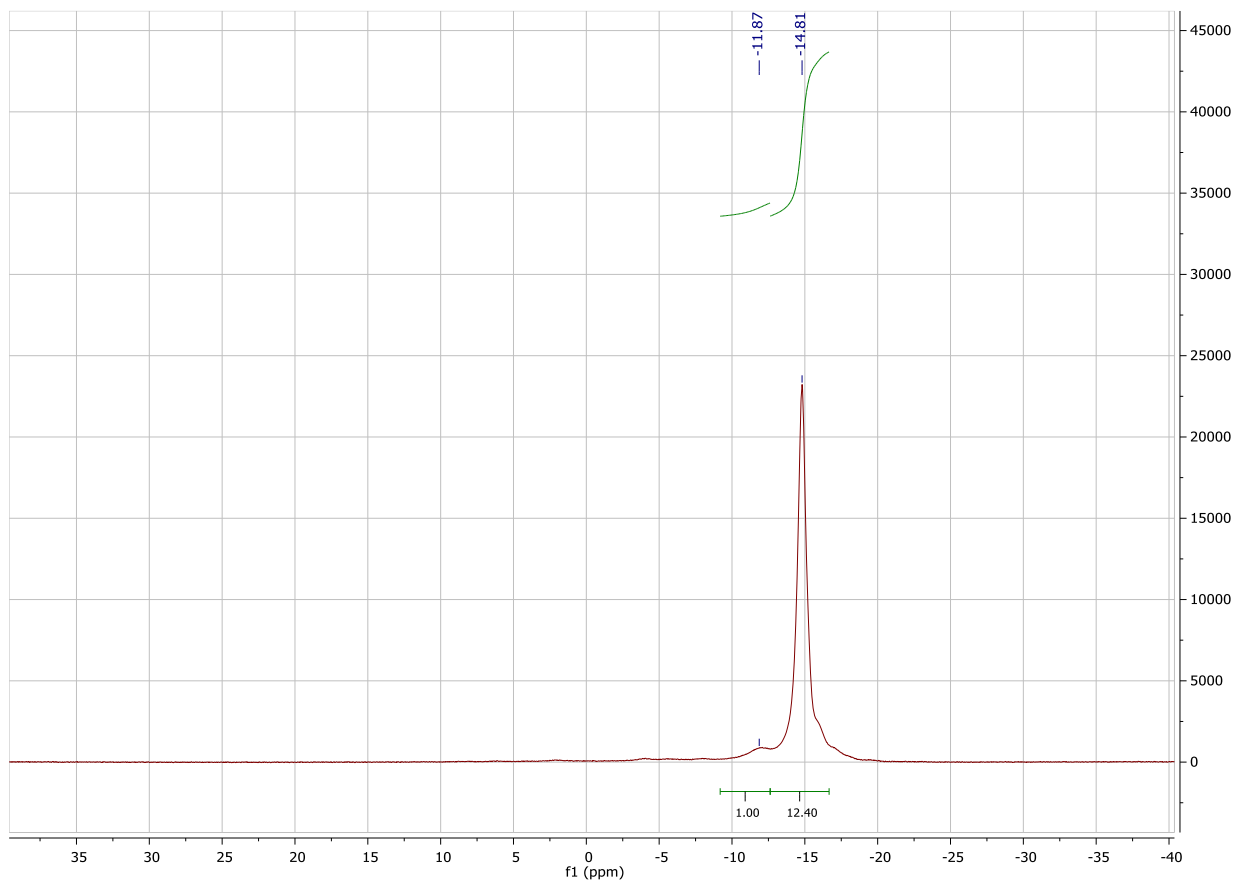

**Figure S14:  $^1\text{H}$  NMR spectrum  $(\text{Bu}_4\text{N})[\text{B}_{12}\text{H}_{11}(\text{NCC}_{10}\text{H}_7)]$  2b**

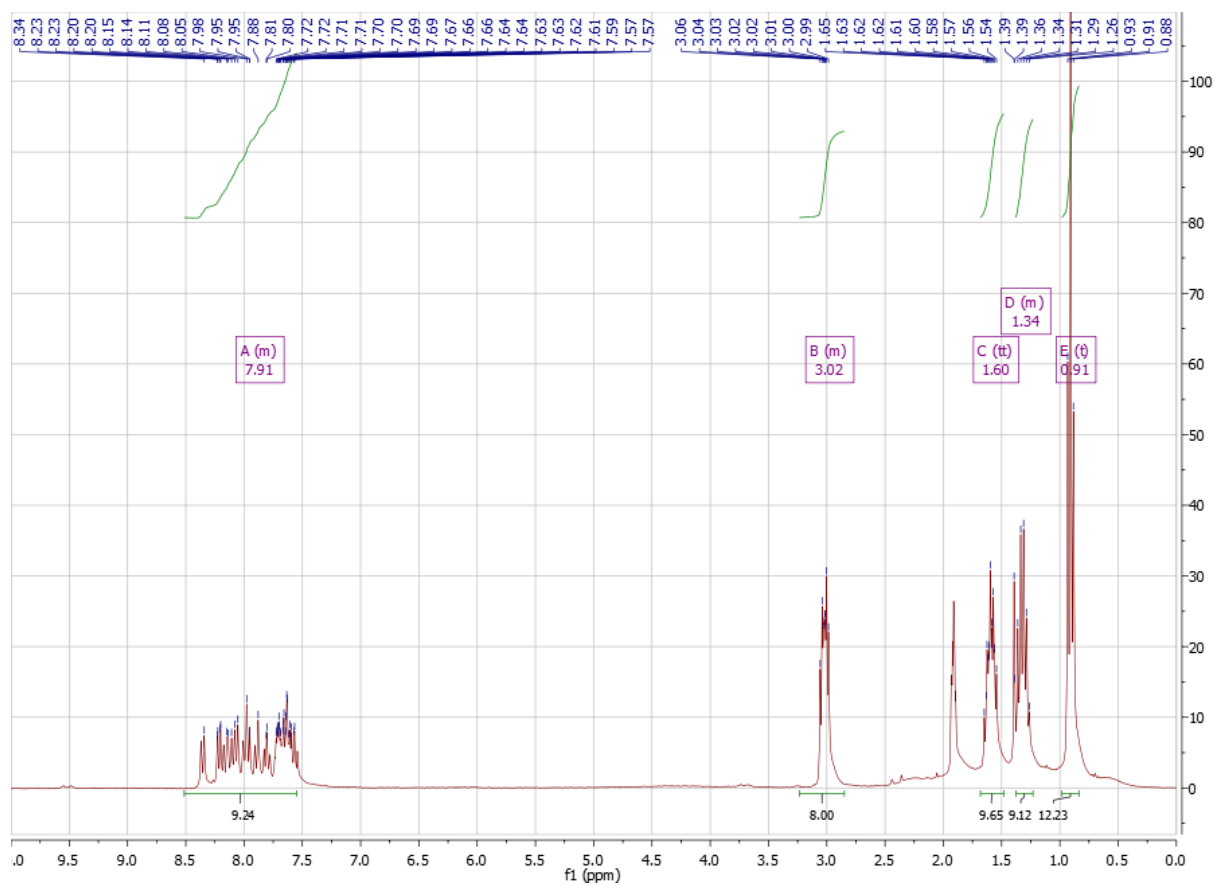



**Figure S15:  $^{13}\text{C}$  NMR spectrum  $(\text{Bu}_4\text{N})[\text{B}_{12}\text{H}_{11}(\text{NCC}_{10}\text{H}_7)]$  2b**

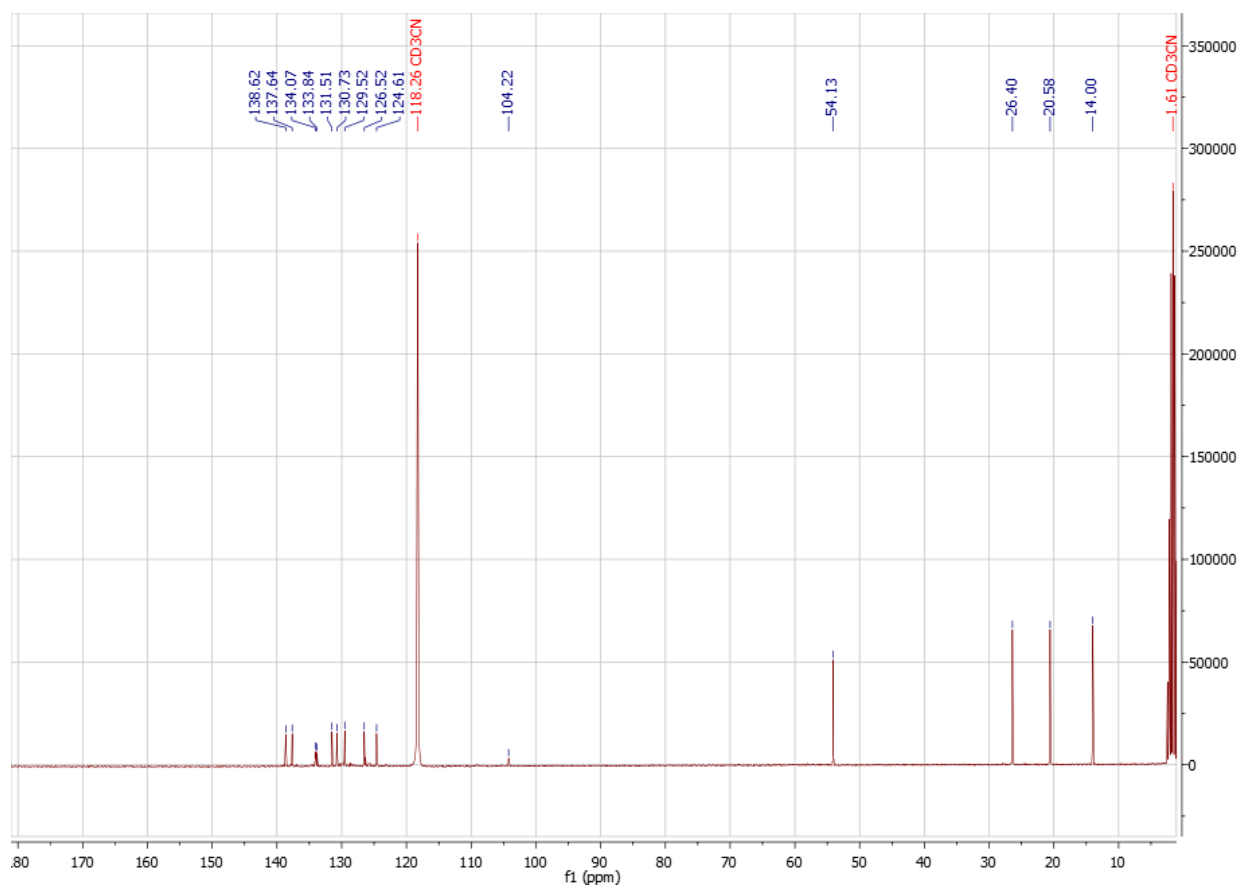

**Figure S16: ESI-MS spectrum  $(\text{Bu}_4\text{N})[\text{B}_{12}\text{H}_{11}(\text{NCC}_{10}\text{H}_7)]$  (negative area) 2b.**

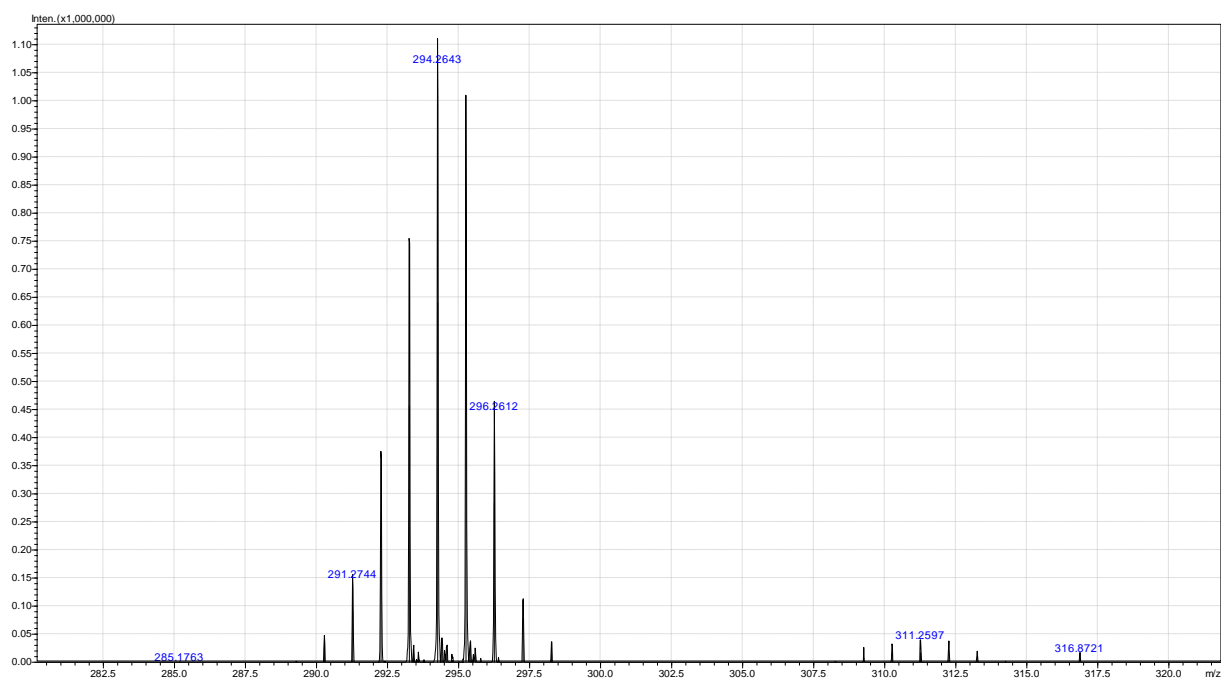

## 2. Computational details

**Table S1.** Cartesian atomic coordinates of the calculated optimized equilibrium model structures. All coordinates are given in Angstrom units.

### Optimized equilibrium model structures in gas phase

| Structure                                                         | Atom | X        | Y        | Z        |
|-------------------------------------------------------------------|------|----------|----------|----------|
| CH <sub>3</sub> CN                                                |      |          |          |          |
|                                                                   | C    | 3.630562 | 8.675135 | 11.07631 |
|                                                                   | N    | 3.629907 | 8.675135 | 9.929943 |
|                                                                   | C    | 3.630418 | 8.675135 | 12.53245 |
|                                                                   | H    | 4.653647 | 8.675135 | 12.90432 |
|                                                                   | H    | 3.118817 | 7.78878  | 12.90337 |
|                                                                   | H    | 3.118816 | 9.561489 | 12.90337 |
| C <sub>3</sub> H <sub>7</sub> CN                                  |      |          |          |          |
|                                                                   | C    | -1.16182 | 0.392019 | 0.167032 |
|                                                                   | N    | -0.18923 | 0.455499 | 0.77186  |
|                                                                   | C    | -2.40726 | 0.286027 | -0.59183 |
|                                                                   | H    | -2.16021 | 0.365413 | -1.65277 |
|                                                                   | H    | -3.02744 | 1.147895 | -0.34104 |
|                                                                   | C    | -3.15512 | -1.02233 | -0.30942 |
|                                                                   | H    | -3.40385 | -1.06583 | 0.752698 |
|                                                                   | H    | -4.10188 | -0.98475 | -0.85166 |
|                                                                   | C    | -2.36746 | -2.25997 | -0.71423 |
|                                                                   | H    | -1.42266 | -2.32163 | -0.17185 |
|                                                                   | H    | -2.14021 | -2.25065 | -1.7819  |
|                                                                   | H    | -2.93331 | -3.16684 | -0.50222 |
| CH <sub>3</sub> C <sub>6</sub> H <sub>4</sub> CN                  |      |          |          |          |
|                                                                   | N    | 4.277441 | 13.89055 | 2.012378 |
|                                                                   | C    | 3.195365 | 13.63237 | 1.726994 |
|                                                                   | C    | 1.84418  | 13.30139 | 1.373594 |
|                                                                   | C    | 1.512399 | 13.03962 | 0.048194 |
|                                                                   | C    | 0.858919 | 13.2439  | 2.357545 |
|                                                                   | C    | 0.207187 | 12.72166 | -0.28431 |
|                                                                   | C    | -0.43893 | 12.92415 | 2.009973 |
|                                                                   | C    | -0.78664 | 12.65523 | 0.687225 |
|                                                                   | H    | 2.276966 | 13.08847 | -0.71565 |
|                                                                   | H    | 1.11679  | 13.45029 | 3.387726 |
|                                                                   | H    | -0.0426  | 12.52302 | -1.31942 |
|                                                                   | H    | -1.19965 | 12.88197 | 2.780285 |
|                                                                   | C    | -2.19861 | 12.28403 | 0.333886 |
|                                                                   | H    | -2.36429 | 12.31997 | -0.74181 |
|                                                                   | H    | -2.42329 | 11.27072 | 0.67254  |
|                                                                   | H    | -2.91312 | 12.95428 | 0.81238  |
| [B <sub>12</sub> H <sub>11</sub> NCCH <sub>3</sub> ] <sup>-</sup> |      |          |          |          |
|                                                                   | N    | 4.325912 | 13.83306 | 2.011305 |

|                                                                                 |   |          |          |          |
|---------------------------------------------------------------------------------|---|----------|----------|----------|
|                                                                                 | C | 3.253626 | 13.57322 | 1.735547 |
|                                                                                 | C | 1.883957 | 13.24213 | 1.401799 |
|                                                                                 | H | 1.858921 | 12.68455 | 0.466858 |
|                                                                                 | H | 1.303513 | 14.1569  | 1.294105 |
|                                                                                 | H | 1.454917 | 12.63299 | 2.195851 |
|                                                                                 | B | 6.867204 | 14.70563 | 1.166121 |
|                                                                                 | H | 6.519046 | 14.85488 | 0.029281 |
|                                                                                 | B | 5.747202 | 14.14661 | 2.388537 |
|                                                                                 | B | 7.021129 | 13.06433 | 1.870918 |
|                                                                                 | H | 6.775108 | 12.09078 | 1.216802 |
|                                                                                 | B | 8.451896 | 14.08335 | 1.653831 |
|                                                                                 | H | 9.285307 | 13.81264 | 0.839485 |
|                                                                                 | B | 8.00168  | 15.76892 | 2.012542 |
|                                                                                 | H | 8.516115 | 16.69272 | 1.453074 |
|                                                                                 | B | 6.287885 | 15.80933 | 2.454173 |
|                                                                                 | H | 5.54331  | 16.71209 | 2.196705 |
|                                                                                 | B | 6.083671 | 14.8501  | 3.954984 |
|                                                                                 | H | 5.198478 | 15.09635 | 4.724295 |
|                                                                                 | B | 6.537081 | 13.15397 | 3.594338 |
|                                                                                 | H | 5.960666 | 12.24174 | 4.115938 |
|                                                                                 | B | 8.248816 | 13.13027 | 3.145429 |
|                                                                                 | H | 8.937527 | 12.18313 | 3.389144 |
|                                                                                 | B | 8.85507  | 14.7967  | 3.229246 |
|                                                                                 | H | 9.987121 | 15.03421 | 3.533543 |
|                                                                                 | B | 7.520939 | 15.85808 | 3.725013 |
|                                                                                 | H | 7.695803 | 16.84443 | 4.37886  |
|                                                                                 | B | 7.672953 | 14.2273  | 4.425238 |
|                                                                                 | H | 7.951046 | 14.05727 | 5.576188 |
| [B <sub>12</sub> H <sub>11</sub> NCC <sub>3</sub> H <sub>7</sub> ] <sup>-</sup> |   |          |          |          |
|                                                                                 | N | 0.068438 | 7.192772 | 13.45591 |
|                                                                                 | C | 1.124834 | 6.984769 | 13.82334 |
|                                                                                 | C | 2.479593 | 6.858705 | 14.33311 |
|                                                                                 | H | 3.1568   | 6.881742 | 13.47637 |
|                                                                                 | H | 2.581208 | 5.882947 | 14.81011 |
|                                                                                 | C | 2.792743 | 8.001467 | 15.31122 |
|                                                                                 | H | 2.124659 | 7.918754 | 16.17024 |
|                                                                                 | H | 3.808439 | 7.842071 | 15.67912 |
|                                                                                 | C | 2.659341 | 9.378904 | 14.67712 |
|                                                                                 | H | 3.318153 | 9.480664 | 13.81235 |
|                                                                                 | H | 2.923624 | 10.15619 | 15.39352 |
|                                                                                 | H | 1.637599 | 9.57135  | 14.34463 |
|                                                                                 | B | -1.3063  | 7.594179 | 13.00327 |
|                                                                                 | B | -2.08307 | 6.807872 | 11.64992 |
|                                                                                 | H | -1.54858 | 5.908926 | 11.06606 |
|                                                                                 | B | -2.69504 | 6.583001 | 13.32125 |
|                                                                                 | H | -2.5778  | 5.529855 | 13.87983 |

|                                                                                                 |   |          |          |          |
|-------------------------------------------------------------------------------------------------|---|----------|----------|----------|
|                                                                                                 | B | -2.46092 | 8.122929 | 14.20851 |
|                                                                                                 | H | -2.17983 | 8.124076 | 15.37386 |
|                                                                                                 | B | -1.70537 | 9.297792 | 13.0872  |
|                                                                                                 | H | -0.90596 | 10.09808 | 13.4889  |
|                                                                                                 | B | -1.4711  | 8.487024 | 11.50666 |
|                                                                                                 | H | -0.51436 | 8.735581 | 10.82889 |
|                                                                                                 | B | -3.81924 | 6.889395 | 11.98772 |
|                                                                                                 | H | -4.5652  | 6.038709 | 11.60008 |
|                                                                                                 | B | -4.05149 | 7.69621  | 13.5589  |
|                                                                                                 | H | -4.9599  | 7.415972 | 14.28479 |
|                                                                                                 | B | -3.44263 | 9.364794 | 13.41623 |
|                                                                                                 | H | -3.91818 | 10.26689 | 14.04191 |
|                                                                                                 | B | -2.8348  | 9.58844  | 11.75592 |
|                                                                                                 | H | -2.88078 | 10.64952 | 11.20532 |
|                                                                                                 | B | -3.06712 | 8.0587   | 10.87315 |
|                                                                                                 | H | -3.27559 | 8.035186 | 9.695623 |
|                                                                                                 | B | -4.28225 | 8.603032 | 12.04928 |
|                                                                                                 | H | -5.36629 | 8.970596 | 11.70229 |
| [B <sub>12</sub> H <sub>11</sub> NCC <sub>6</sub> H <sub>4</sub> CH <sub>3</sub> ] <sup>−</sup> |   |          |          |          |
|                                                                                                 | N | 4.261241 | 13.87133 | 1.998186 |
|                                                                                                 | C | 3.18226  | 13.6249  | 1.724682 |
|                                                                                                 | B | 6.80437  | 14.73655 | 1.162821 |
|                                                                                                 | H | 6.454142 | 14.9151  | 0.030891 |
|                                                                                                 | B | 5.680054 | 14.16465 | 2.376849 |
|                                                                                                 | B | 6.94142  | 13.07844 | 1.83019  |
|                                                                                                 | H | 6.680897 | 12.12351 | 1.155249 |
|                                                                                                 | B | 8.383602 | 14.08462 | 1.629909 |
|                                                                                                 | H | 9.210067 | 13.82205 | 0.805961 |
|                                                                                                 | B | 7.95534  | 15.76726 | 2.027859 |
|                                                                                                 | H | 8.478665 | 16.69687 | 1.486753 |
|                                                                                                 | B | 6.243803 | 15.81977 | 2.477385 |
|                                                                                                 | H | 5.510673 | 16.73734 | 2.243114 |
|                                                                                                 | B | 6.033035 | 14.82872 | 3.957651 |
|                                                                                                 | H | 5.154867 | 15.06864 | 4.736882 |
|                                                                                                 | B | 6.464707 | 13.1353  | 3.557955 |
|                                                                                                 | H | 5.879047 | 12.21937 | 4.061523 |
|                                                                                                 | B | 8.174431 | 13.10067 | 3.101105 |
|                                                                                                 | H | 8.851725 | 12.13956 | 3.320772 |
|                                                                                                 | B | 8.801405 | 14.75775 | 3.219428 |
|                                                                                                 | H | 9.937529 | 14.97437 | 3.523916 |
|                                                                                                 | B | 7.482098 | 15.82418 | 3.744301 |
|                                                                                                 | H | 7.671121 | 16.79316 | 4.41963  |
|                                                                                                 | B | 7.616771 | 14.17633 | 4.407458 |
|                                                                                                 | H | 7.897088 | 13.97731 | 5.553171 |
|                                                                                                 | C | 1.838329 | 13.30521 | 1.374224 |
|                                                                                                 | C | 1.513714 | 13.04523 | 0.045842 |

|  |   |          |          |          |
|--|---|----------|----------|----------|
|  | C | 0.85691  | 13.24798 | 2.362976 |
|  | C | 0.209273 | 12.72592 | -0.28477 |
|  | C | -0.43902 | 12.92746 | 2.012245 |
|  | C | -0.78312 | 12.65818 | 0.688402 |
|  | H | 2.282403 | 13.09515 | -0.71354 |
|  | H | 1.119468 | 13.45332 | 3.392017 |
|  | H | -0.04044 | 12.52587 | -1.31953 |
|  | H | -1.20078 | 12.8833  | 2.781325 |
|  | C | -2.19389 | 12.28214 | 0.334557 |
|  | H | -2.35738 | 12.31283 | -0.74174 |
|  | H | -2.41625 | 11.26972 | 0.677701 |
|  | H | -2.91061 | 12.9531  | 0.808963 |

**Table S2.** Cartesian atomic coordinates of the calculated optimized equilibrium model structures. All coordinates are given in Angstrom units.

**Optimized equilibrium model structures in dichloromethane**

| Structure                                         | Atom | X        | Y        | Z        |
|---------------------------------------------------|------|----------|----------|----------|
| <b>CH<sub>3</sub>CN</b>                           |      |          |          |          |
|                                                   | C    | 3.630907 | 8.674766 | 11.08262 |
|                                                   | N    | 3.629215 | 8.675509 | 9.935158 |
|                                                   | C    | 3.630845 | 8.675065 | 12.53356 |
|                                                   | H    | 4.655861 | 8.675154 | 12.90093 |
|                                                   | H    | 3.117673 | 7.787039 | 12.89898 |
|                                                   | H    | 3.117667 | 9.563277 | 12.89851 |
| <b>C<sub>3</sub>H<sub>7</sub>CN</b>               |      |          |          |          |
|                                                   | C    | -1.16558 | 0.401083 | 0.166245 |
|                                                   | N    | -0.19276 | 0.477471 | 0.77098  |
|                                                   | C    | -2.40677 | 0.284795 | -0.5923  |
|                                                   | H    | -2.15263 | 0.364654 | -1.65115 |
|                                                   | H    | -3.02629 | 1.146264 | -0.33979 |
|                                                   | C    | -3.15024 | -1.02472 | -0.30544 |
|                                                   | H    | -3.3988  | -1.06866 | 0.756692 |
|                                                   | H    | -4.09505 | -0.98072 | -0.84936 |
|                                                   | C    | -2.37019 | -2.26382 | -0.7162  |
|                                                   | H    | -1.42657 | -2.34379 | -0.17171 |
|                                                   | H    | -2.14069 | -2.25025 | -1.78377 |
|                                                   | H    | -2.94488 | -3.16744 | -0.50954 |
| <b>CH<sub>3</sub>C<sub>6</sub>H<sub>4</sub>CN</b> |      |          |          |          |
|                                                   | N    | 4.271856 | 13.88835 | 2.011885 |
|                                                   | C    | 3.189268 | 13.63002 | 1.725518 |
|                                                   | C    | 1.840578 | 13.30058 | 1.372561 |
|                                                   | C    | 1.513756 | 13.03972 | 0.044248 |
|                                                   | C    | 0.857827 | 13.24436 | 2.36124  |
|                                                   | C    | 0.208235 | 12.72222 | -0.28725 |
|                                                   | C    | -0.43956 | 12.9248  | 2.012091 |

|                                                                                 |   |          |          |          |
|---------------------------------------------------------------------------------|---|----------|----------|----------|
|                                                                                 | C | -0.78556 | 12.65617 | 0.686936 |
|                                                                                 | H | 2.277556 | 13.0883  | -0.72056 |
|                                                                                 | H | 1.114584 | 13.45021 | 3.391937 |
|                                                                                 | H | -0.04141 | 12.52365 | -1.32237 |
|                                                                                 | H | -1.20032 | 12.88202 | 2.782246 |
|                                                                                 | C | -2.19571 | 12.28532 | 0.334104 |
|                                                                                 | H | -2.36059 | 12.31852 | -0.74216 |
|                                                                                 | H | -2.4186  | 11.27227 | 0.676456 |
|                                                                                 | H | -2.9098  | 12.95514 | 0.814652 |
| [B <sub>12</sub> H <sub>11</sub> NCCH <sub>3</sub> ] <sup>−</sup>               |   |          |          |          |
|                                                                                 | N | 4.297232 | 13.82544 | 2.00802  |
|                                                                                 | C | 3.223949 | 13.56685 | 1.731883 |
|                                                                                 | C | 1.864256 | 13.241   | 1.3922   |
|                                                                                 | H | 1.855165 | 12.68515 | 0.455707 |
|                                                                                 | H | 1.295144 | 14.16315 | 1.284746 |
|                                                                                 | H | 1.439596 | 12.63189 | 2.189041 |
|                                                                                 | B | 6.862616 | 14.70124 | 1.174707 |
|                                                                                 | H | 6.533315 | 14.85581 | 0.035577 |
|                                                                                 | B | 5.72116  | 14.13855 | 2.384968 |
|                                                                                 | B | 7.018197 | 13.06915 | 1.876748 |
|                                                                                 | H | 6.794067 | 12.09203 | 1.224997 |
|                                                                                 | B | 8.449814 | 14.08513 | 1.657818 |
|                                                                                 | H | 9.28689  | 13.81658 | 0.845884 |
|                                                                                 | B | 7.999859 | 15.76505 | 2.014874 |
|                                                                                 | H | 8.517522 | 16.68864 | 1.457073 |
|                                                                                 | B | 6.286911 | 15.79941 | 2.45624  |
|                                                                                 | H | 5.558327 | 16.71334 | 2.20382  |
|                                                                                 | B | 6.086943 | 14.846   | 3.950335 |
|                                                                                 | H | 5.219282 | 15.099   | 4.733329 |
|                                                                                 | B | 6.53904  | 13.1588  | 3.591822 |
|                                                                                 | H | 5.983263 | 12.24402 | 4.125192 |
|                                                                                 | B | 8.250645 | 13.13602 | 3.145293 |
|                                                                                 | H | 8.945731 | 12.19318 | 3.389595 |
|                                                                                 | B | 8.858328 | 14.79871 | 3.228142 |
|                                                                                 | H | 9.991182 | 15.03795 | 3.530784 |
|                                                                                 | B | 7.523155 | 15.8541  | 3.722472 |
|                                                                                 | H | 7.703876 | 16.84024 | 4.375866 |
|                                                                                 | B | 7.677216 | 14.22935 | 4.421096 |
|                                                                                 | H | 7.963217 | 14.06188 | 5.57092  |
| [B <sub>12</sub> H <sub>11</sub> NCC <sub>3</sub> H <sub>7</sub> ] <sup>−</sup> |   |          |          |          |
|                                                                                 | N | 0.049664 | 7.497433 | 13.47797 |
|                                                                                 | C | 1.111652 | 7.317123 | 13.84642 |
|                                                                                 | C | 2.46569  | 7.155164 | 14.32843 |
|                                                                                 | H | 3.117095 | 7.199077 | 13.45296 |
|                                                                                 | H | 2.542561 | 6.15438  | 14.75543 |
|                                                                                 | C | 2.826068 | 8.241201 | 15.35269 |

|                                                                                                 |   |          |          |          |
|-------------------------------------------------------------------------------------------------|---|----------|----------|----------|
|                                                                                                 | H | 2.19072  | 8.124613 | 16.23168 |
|                                                                                                 | H | 3.850079 | 8.03775  | 15.66685 |
|                                                                                                 | C | 2.711157 | 9.651327 | 14.79638 |
|                                                                                                 | H | 3.32832  | 9.776989 | 13.90454 |
|                                                                                                 | H | 3.038861 | 10.38094 | 15.53721 |
|                                                                                                 | H | 1.68085  | 9.898246 | 14.53015 |
|                                                                                                 | B | -1.34905 | 7.782691 | 13.00268 |
|                                                                                                 | B | -2.05754 | 6.864926 | 11.6852  |
|                                                                                                 | H | -1.45074 | 5.990738 | 11.13997 |
|                                                                                                 | B | -2.65824 | 6.668031 | 13.35352 |
|                                                                                                 | H | -2.46472 | 5.657418 | 13.96267 |
|                                                                                                 | B | -2.58272 | 8.258581 | 14.15765 |
|                                                                                                 | H | -2.33684 | 8.34966  | 15.32433 |
|                                                                                                 | B | -1.93527 | 9.437668 | 12.98654 |
|                                                                                                 | H | -1.23847 | 10.34146 | 13.34428 |
|                                                                                                 | B | -1.61084 | 8.576914 | 11.45911 |
|                                                                                                 | H | -0.6926  | 8.886153 | 10.75839 |
|                                                                                                 | B | -3.79668 | 6.793979 | 12.00469 |
|                                                                                                 | H | -4.45639 | 5.858481 | 11.65639 |
|                                                                                                 | B | -4.11954 | 7.651091 | 13.52563 |
|                                                                                                 | H | -5.00748 | 7.324538 | 14.25829 |
|                                                                                                 | B | -3.67464 | 9.355287 | 13.3004  |
|                                                                                                 | H | -4.24606 | 10.2372  | 13.87294 |
|                                                                                                 | B | -3.07725 | 9.551359 | 11.63968 |
|                                                                                                 | H | -3.22723 | 10.57238 | 11.03376 |
|                                                                                                 | B | -3.15171 | 7.968384 | 10.8387  |
|                                                                                                 | H | -3.35017 | 7.865485 | 9.663193 |
|                                                                                                 | B | -4.42563 | 8.450804 | 11.97358 |
|                                                                                                 | H | -5.53752 | 8.692192 | 11.60244 |
| [B <sub>12</sub> H <sub>11</sub> NCC <sub>6</sub> H <sub>4</sub> CH <sub>3</sub> ] <sup>-</sup> |   |          |          |          |
|                                                                                                 | N | 4.237555 | 13.86037 | 1.992333 |
|                                                                                                 | C | 3.158563 | 13.61514 | 1.713848 |
|                                                                                                 | B | 6.804739 | 14.73088 | 1.172133 |
|                                                                                                 | H | 6.473326 | 14.91287 | 0.037769 |
|                                                                                                 | B | 5.661489 | 14.15327 | 2.373293 |
|                                                                                                 | B | 6.946991 | 13.08198 | 1.838423 |
|                                                                                                 | H | 6.710654 | 12.12244 | 1.165379 |
|                                                                                                 | B | 8.387316 | 14.08857 | 1.636629 |
|                                                                                                 | H | 9.218745 | 13.82939 | 0.815897 |
|                                                                                                 | B | 7.955491 | 15.76498 | 2.03163  |
|                                                                                                 | H | 8.480721 | 16.69515 | 1.492131 |
|                                                                                                 | B | 6.244551 | 15.80733 | 2.478674 |
|                                                                                                 | H | 5.524703 | 16.73369 | 2.248146 |
|                                                                                                 | B | 6.038245 | 14.82302 | 3.952167 |
|                                                                                                 | H | 5.175498 | 15.06923 | 4.742538 |
|                                                                                                 | B | 6.473599 | 13.13895 | 3.556118 |

|  |   |          |          |          |
|--|---|----------|----------|----------|
|  | H | 5.909805 | 12.2188  | 4.071192 |
|  | B | 8.183722 | 13.10958 | 3.104195 |
|  | H | 8.870023 | 12.15474 | 3.325936 |
|  | B | 8.807397 | 14.76401 | 3.220929 |
|  | H | 9.943497 | 14.98525 | 3.525168 |
|  | B | 7.484387 | 15.82166 | 3.741977 |
|  | H | 7.676329 | 16.79119 | 4.416653 |
|  | B | 7.623891 | 14.18042 | 4.404788 |
|  | H | 7.911346 | 13.98544 | 5.549928 |
|  | C | 1.821181 | 13.29986 | 1.36572  |
|  | C | 1.502129 | 13.04294 | 0.032758 |
|  | C | 0.844608 | 13.24467 | 2.362998 |
|  | C | 0.197924 | 12.72628 | -0.2946  |
|  | C | -0.44996 | 12.92655 | 2.011557 |
|  | C | -0.79306 | 12.65935 | 0.684051 |
|  | H | 2.268135 | 13.09281 | -0.72912 |
|  | H | 1.106622 | 13.4478  | 3.392425 |
|  | H | -0.05458 | 12.52782 | -1.32856 |
|  | H | -1.21189 | 12.88196 | 2.779848 |
|  | C | -2.20178 | 12.28712 | 0.333076 |
|  | H | -2.36683 | 12.31231 | -0.74303 |
|  | H | -2.42123 | 11.27642 | 0.684546 |
|  | H | -2.91471 | 12.95912 | 0.811979 |

**Table S3.** Cartesian atomic coordinates of the calculated optimized equilibrium model structures. All coordinates are given in Angstrom units.

**Optimized equilibrium model structures in acetonitrile**

| Structure                        | Atom | X        | Y        | Z        |
|----------------------------------|------|----------|----------|----------|
| CH <sub>3</sub> CN               |      |          |          |          |
|                                  | C    | 3.630907 | 8.674766 | 11.08346 |
|                                  | N    | 3.629215 | 8.675509 | 9.935744 |
|                                  | C    | 3.630841 | 8.675065 | 12.53377 |
|                                  | H    | 4.656107 | 8.675153 | 12.90039 |
|                                  | H    | 3.117552 | 7.786816 | 12.89843 |
|                                  | H    | 3.117544 | 9.5635   | 12.89797 |
| C <sub>3</sub> H <sub>7</sub> CN |      |          |          |          |
|                                  | C    | -1.16615 | 0.400522 | 0.165426 |
|                                  | N    | -0.1929  | 0.476764 | 0.769899 |
|                                  | C    | -2.40721 | 0.284623 | -0.59247 |
|                                  | H    | -2.15291 | 0.3649   | -1.6512  |
|                                  | H    | -3.02608 | 1.146248 | -0.33906 |
|                                  | C    | -3.15019 | -1.02486 | -0.30515 |
|                                  | H    | -3.39936 | -1.06852 | 0.75683  |
|                                  | H    | -4.09442 | -0.98051 | -0.8498  |
|                                  | C    | -2.36992 | -2.26366 | -0.71589 |



|                                                                   |   |          |          |          |
|-------------------------------------------------------------------|---|----------|----------|----------|
|                                                                   | H | -1.42656 | -2.34419 | -0.17073 |
|                                                                   | H | -2.13985 | -2.24919 | -1.78331 |
|                                                                   | H | -2.9449  | -3.16727 | -0.50987 |
| CH <sub>3</sub> C <sub>6</sub> H <sub>4</sub> CN                  |   |          |          |          |
|                                                                   | N | 4.27106  | 13.88775 | 2.011749 |
|                                                                   | C | 3.188257 | 13.62957 | 1.72529  |
|                                                                   | C | 1.839997 | 13.30049 | 1.372412 |
|                                                                   | C | 1.513777 | 13.03978 | 0.043777 |
|                                                                   | C | 0.857554 | 13.24448 | 2.361611 |
|                                                                   | C | 0.208294 | 12.72232 | -0.28759 |
|                                                                   | C | -0.43971 | 12.92497 | 2.012301 |
|                                                                   | C | -0.7854  | 12.65627 | 0.686919 |
|                                                                   | H | 2.27745  | 13.08828 | -0.72118 |
|                                                                   | H | 1.114093 | 13.45028 | 3.392392 |
|                                                                   | H | -0.04136 | 12.52373 | -1.32269 |
|                                                                   | H | -1.20049 | 12.88219 | 2.782411 |
|                                                                   | C | -2.19519 | 12.28547 | 0.334119 |
|                                                                   | H | -2.35976 | 12.31851 | -0.74218 |
|                                                                   | H | -2.41746 | 11.27242 | 0.676907 |
|                                                                   | H | -2.90899 | 12.95512 | 0.815281 |
| [B <sub>12</sub> H <sub>11</sub> NCCH <sub>3</sub> ] <sup>-</sup> |   |          |          |          |
|                                                                   | N | 4.294097 | 13.82437 | 2.007367 |
|                                                                   | C | 3.220364 | 13.56585 | 1.730961 |
|                                                                   | C | 1.861732 | 13.24108 | 1.391191 |
|                                                                   | H | 1.854329 | 12.68539 | 0.454547 |
|                                                                   | H | 1.294614 | 14.16455 | 1.284054 |
|                                                                   | H | 1.438206 | 12.63217 | 2.188848 |
|                                                                   | B | 6.862111 | 14.70063 | 1.175553 |
|                                                                   | H | 6.534479 | 14.85557 | 0.036318 |
|                                                                   | B | 5.717554 | 14.13727 | 2.384278 |
|                                                                   | B | 7.018006 | 13.06949 | 1.877335 |
|                                                                   | H | 6.795841 | 12.09225 | 1.225702 |
|                                                                   | B | 8.449491 | 14.08555 | 1.658811 |
|                                                                   | H | 9.287879 | 13.81767 | 0.847821 |
|                                                                   | B | 7.999548 | 15.76419 | 2.015502 |
|                                                                   | H | 8.518464 | 16.68767 | 1.45841  |
|                                                                   | B | 6.286617 | 15.7982  | 2.456364 |
|                                                                   | H | 5.559413 | 16.71294 | 2.204359 |
|                                                                   | B | 6.087122 | 14.84539 | 3.949788 |
|                                                                   | H | 5.221038 | 15.09891 | 4.733871 |
|                                                                   | B | 6.539269 | 13.15913 | 3.591535 |
|                                                                   | H | 5.98546  | 12.24417 | 4.125929 |
|                                                                   | B | 8.25085  | 13.13723 | 3.145264 |
|                                                                   | H | 8.947615 | 12.19556 | 3.389916 |
|                                                                   | B | 8.858238 | 14.79895 | 3.227966 |
|                                                                   | H | 9.991224 | 15.03855 | 3.530493 |

|                                                                                                 |   |          |          |          |
|-------------------------------------------------------------------------------------------------|---|----------|----------|----------|
|                                                                                                 | B | 7.523372 | 15.85316 | 3.721898 |
|                                                                                                 | H | 7.705684 | 16.83916 | 4.375289 |
|                                                                                                 | B | 7.677718 | 14.22971 | 4.420095 |
|                                                                                                 | H | 7.965562 | 14.06291 | 5.569688 |
| [B <sub>12</sub> H <sub>11</sub> NCC <sub>3</sub> H <sub>7</sub> ] <sup>−</sup>                 |   |          |          |          |
|                                                                                                 | N | 0.054424 | 7.488018 | 13.4713  |
|                                                                                                 | C | 1.114816 | 7.309481 | 13.84644 |
|                                                                                                 | C | 2.459533 | 7.151076 | 14.35125 |
|                                                                                                 | H | 3.125391 | 7.171015 | 13.4859  |
|                                                                                                 | H | 2.522244 | 6.160322 | 14.80335 |
|                                                                                                 | C | 2.805923 | 8.259857 | 15.35573 |
|                                                                                                 | H | 2.146429 | 8.173256 | 16.22027 |
|                                                                                                 | H | 3.818752 | 8.053092 | 15.70166 |
|                                                                                                 | C | 2.722706 | 9.655369 | 14.75918 |
|                                                                                                 | H | 3.378432 | 9.75423  | 13.89193 |
|                                                                                                 | H | 3.022296 | 10.40235 | 15.49455 |
|                                                                                                 | H | 1.705936 | 9.90003  | 14.44227 |
|                                                                                                 | B | -1.34243 | 7.777797 | 12.99586 |
|                                                                                                 | B | -2.05482 | 6.873521 | 11.67037 |
|                                                                                                 | H | -1.45162 | 6.002454 | 11.11696 |
|                                                                                                 | B | -2.65622 | 6.664181 | 13.3362  |
|                                                                                                 | H | -2.46712 | 5.647987 | 13.93672 |
|                                                                                                 | B | -2.57757 | 8.247256 | 14.15315 |
|                                                                                                 | H | -2.33346 | 8.328665 | 15.32053 |
|                                                                                                 | B | -1.9274  | 9.434098 | 12.99258 |
|                                                                                                 | H | -1.22972 | 10.33376 | 13.35781 |
|                                                                                                 | B | -1.60458 | 8.58575  | 11.45865 |
|                                                                                                 | H | -0.68691 | 8.899352 | 10.75973 |
|                                                                                                 | B | -3.79423 | 6.803882 | 11.98859 |
|                                                                                                 | H | -4.45647 | 5.873083 | 11.63226 |
|                                                                                                 | B | -4.11551 | 7.648746 | 13.51597 |
|                                                                                                 | H | -5.00469 | 7.318235 | 14.24549 |
|                                                                                                 | B | -3.66698 | 9.353243 | 13.30505 |
|                                                                                                 | H | -4.23696 | 10.23164 | 13.88461 |
|                                                                                                 | B | -3.06893 | 9.56167  | 11.64671 |
|                                                                                                 | H | -3.21714 | 10.58795 | 11.04911 |
|                                                                                                 | B | -3.14665 | 7.986067 | 10.83295 |
|                                                                                                 | H | -3.3457  | 7.893321 | 9.656601 |
|                                                                                                 | B | -4.41979 | 8.461827 | 11.97097 |
|                                                                                                 | H | -5.53124 | 8.708775 | 11.60154 |
| [B <sub>12</sub> H <sub>11</sub> NCC <sub>6</sub> H <sub>4</sub> CH <sub>3</sub> ] <sup>−</sup> |   |          |          |          |
|                                                                                                 | N | 4.235715 | 13.85911 | 1.991368 |
|                                                                                                 | C | 3.156171 | 13.61408 | 1.712826 |
|                                                                                                 | B | 6.804941 | 14.72893 | 1.1726   |
|                                                                                                 | H | 6.476019 | 14.91051 | 0.037721 |
|                                                                                                 | B | 5.658282 | 14.15172 | 2.372325 |

|  |   |          |          |          |
|--|---|----------|----------|----------|
|  | B | 6.947304 | 13.08149 | 1.840151 |
|  | H | 6.713705 | 12.12094 | 1.168061 |
|  | B | 8.387545 | 14.08779 | 1.637931 |
|  | H | 9.220118 | 13.82837 | 0.818323 |
|  | B | 7.955543 | 15.76379 | 2.031108 |
|  | H | 8.481783 | 16.6934  | 1.491458 |
|  | B | 6.244615 | 15.80592 | 2.477311 |
|  | H | 5.526558 | 16.73324 | 2.246237 |
|  | B | 6.038148 | 14.82352 | 3.950853 |
|  | H | 5.177268 | 15.06936 | 4.742965 |
|  | B | 6.473742 | 13.13996 | 3.556675 |
|  | H | 5.91205  | 12.21989 | 4.073601 |
|  | B | 8.183961 | 13.1106  | 3.105707 |
|  | H | 8.87143  | 12.15681 | 3.328734 |
|  | B | 8.807623 | 14.76464 | 3.221147 |
|  | H | 9.943718 | 14.98642 | 3.525483 |
|  | B | 7.484246 | 15.8219  | 3.740521 |
|  | H | 7.677049 | 16.79191 | 4.41441  |
|  | B | 7.623761 | 14.18202 | 4.404574 |
|  | H | 7.912105 | 13.98851 | 5.549822 |
|  | C | 1.819829 | 13.29957 | 1.365106 |
|  | C | 1.500469 | 13.04586 | 0.03128  |
|  | C | 0.844133 | 13.24147 | 2.363501 |
|  | C | 0.196353 | 12.72967 | -0.29577 |
|  | C | -0.45018 | 12.9235  | 2.012015 |
|  | C | -0.79376 | 12.65967 | 0.683778 |
|  | H | 2.265716 | 13.09804 | -0.73117 |
|  | H | 1.106355 | 13.44251 | 3.393253 |
|  | H | -0.05714 | 12.53391 | -1.32997 |
|  | H | -1.21172 | 12.8763  | 2.78047  |
|  | C | -2.20217 | 12.28794 | 0.332933 |
|  | H | -2.36796 | 12.31605 | -0.74291 |
|  | H | -2.41976 | 11.27609 | 0.682267 |
|  | H | -2.91457 | 12.95774 | 0.815596 |

**Table S4.** Crystal data and structure refinement for **1a** and **1b**.

| entification code | <b>1a</b>                                                      | <b>1b</b>                                          |
|-------------------|----------------------------------------------------------------|----------------------------------------------------|
| Empirical formula | C <sub>10</sub> H <sub>34</sub> B <sub>12</sub> N <sub>2</sub> | C <sub>28</sub> H <sub>38</sub> B <sub>12</sub> NP |
| Formula weight    | 312.11                                                         | 549.28                                             |
| Temperature/K     | 100                                                            | 100                                                |
| Crystal system    | orthorhombic                                                   | triclinic                                          |
| Space group       | Pbcn                                                           | P-1                                                |
| a/Å               | 13.711(6)                                                      | 10.076(2)                                          |
| b/Å               | 17.515(3)                                                      | 11.413(3)                                          |
| c/Å               | 17.391(5)                                                      | 15.720(4)                                          |
| α/°               | 90                                                             | 103.483(12)                                        |

|                                         |                                                                     |                                                                     |
|-----------------------------------------|---------------------------------------------------------------------|---------------------------------------------------------------------|
| $\beta/^\circ$                          | 90                                                                  | 95.907(10)                                                          |
| $\gamma/^\circ$                         | 90                                                                  | 113.512(9)                                                          |
| Volume/ $\text{\AA}^3$                  | 4177(2)                                                             | 1572.6(7)                                                           |
| Z                                       | 8                                                                   | 2                                                                   |
| $\rho_{\text{calc}}/\text{g/cm}^3$      | 0.993                                                               | 1.160                                                               |
| $\mu/\text{mm}^{-1}$                    | 0.049                                                               | 0.109                                                               |
| F(000)                                  | 1344.0                                                              | 576.0                                                               |
| Radiation                               | MoK $\alpha$ ( $\lambda = 0.71073$ )                                | MoK $\alpha$ ( $\lambda = 0.71073$ )                                |
| Reflections collected                   | 12508                                                               | 20048                                                               |
| Independent reflections                 | 4079 [ $R_{\text{int}} = 0.0450$ ,<br>$R_{\text{sigma}} = 0.0565$ ] | 8269 [ $R_{\text{int}} = 0.0279$ ,<br>$R_{\text{sigma}} = 0.0393$ ] |
| Data/restraints/parameters              | 4079/0/223                                                          | 8269/0/380                                                          |
| Goodness-of-fit on $F^2$                | 1.033                                                               | 1.061                                                               |
| Final R indexes [ $I \geq 2\sigma(I)$ ] | $R_1 = 0.0886$ , $wR_2 = 0.2524$                                    | $R_1 = 0.0488$ , $wR_2 = 0.1279$                                    |
| Final R indexes [all data]              | $R_1 = 0.1095$ , $wR_2 = 0.2738$                                    | $R_1 = 0.0585$ , $wR_2 = 0.1336$                                    |
