# Supplementary material for: New Aspects of the Synthesis of closo-Dodecaborate Nitrilium Derivatives [B12H11NCR]− (R = n-C3H7, i-C3H7, 4-C6H4CH3, 1-C10H7): Experimental and Theoretical Studies
Source: MDPI journal article supplement (doi:10.3390/inorganics10110196), 2022-11-02
Supplement: s1 [file s1 › 1.cif]

data_mo_22kub31_0m_a
_audit_creation_date               2022-09-13
_audit_creation_method
;
Olex2 1.5
(compiled 2022.04.07 svn.rca3783a0 for OlexSys, GUI svn.r6498)
;
_shelx_SHELXL_version_number       '2018/3'
_audit_contact_author_address      ?
_audit_contact_author_email        ?
_audit_contact_author_name         ''
_audit_contact_author_phone        ?
_publ_contact_author_id_orcid      ?
_publ_section_references
;
Dolomanov, O.V., Bourhis, L.J., Gildea, R.J, Howard, J.A.K. & Puschmann, H.
 (2009), J. Appl. Cryst. 42, 339-341.

Sheldrick, G.M. (2015). Acta Cryst. C71, 3-8.
;
_chemical_name_common              ?
_chemical_name_systematic          ?
_chemical_formula_moiety           'C2 H14 B12 N, 2(C4 H10 N0.5)'
_chemical_formula_sum              'C10 H34 B12 N2'
_chemical_formula_weight           312.11
_chemical_melting_point            ?
loop_
  _atom_type_symbol
  _atom_type_description
  _atom_type_scat_dispersion_real
  _atom_type_scat_dispersion_imag
  _atom_type_scat_source
 'C' 'C' 0.0033 0.0016 'International Tables Vol C Tables 4.2.6.8 and 6.1.1.4'
 'H' 'H' 0.0000 0.0000 'International Tables Vol C Tables 4.2.6.8 and 6.1.1.4'
 'B' 'B' 0.0013 0.0007 'International Tables Vol C Tables 4.2.6.8 and 6.1.1.4'
 'N' 'N' 0.0061 0.0033 'International Tables Vol C Tables 4.2.6.8 and 6.1.1.4'

_shelx_space_group_comment
;
The symmetry employed for this shelxl refinement is uniquely defined
by the following loop, which should always be used as a source of
symmetry information in preference to the above space-group names.
They are only intended as comments.
;
_space_group_crystal_system        'orthorhombic'
_space_group_IT_number             60
_space_group_name_H-M_alt          'P b c n'
_space_group_name_Hall             '-P 2n 2ab'
loop_
  _space_group_symop_operation_xyz
 'x, y, z'
 '-x+1/2, -y+1/2, z+1/2'
 '-x, y, -z+1/2'
 'x+1/2, -y+1/2, -z'
 '-x, -y, -z'
 'x-1/2, y-1/2, -z-1/2'
 'x, -y, z-1/2'
 '-x-1/2, y-1/2, z'

_cell_length_a                     13.711(6)
_cell_length_b                     17.515(3)
_cell_length_c                     17.391(5)
_cell_angle_alpha                  90
_cell_angle_beta                   90
_cell_angle_gamma                  90
_cell_volume                       4177(2)
_cell_formula_units_Z              8
_cell_measurement_reflns_used      5401
_cell_measurement_temperature      100
_cell_measurement_theta_max        30.046
_cell_measurement_theta_min        2.221
_shelx_estimated_absorpt_T_max     0.995
_shelx_estimated_absorpt_T_min     0.976
_exptl_absorpt_coefficient_mu      0.049
_exptl_absorpt_correction_T_max    0.7460
_exptl_absorpt_correction_T_min    0.5861
_exptl_absorpt_correction_type     multi-scan
_exptl_absorpt_process_details
;
SADABS-2016/2 (Bruker,2016/2) was used for absorption correction.
wR2(int) was 0.0758 before and 0.0571 after correction.
The Ratio of minimum to maximum transmission is 0.7857.
The \l/2 correction factor is Not present.
;
_exptl_absorpt_special_details     ?
_exptl_crystal_colour              colourless
_exptl_crystal_colour_primary      colourless
_exptl_crystal_density_diffrn      0.993
_exptl_crystal_density_meas        ?
_exptl_crystal_density_method      ?
_exptl_crystal_description         block
_exptl_crystal_F_000               1344
_exptl_crystal_size_max            0.5
_exptl_crystal_size_mid            0.2
_exptl_crystal_size_min            0.1
_exptl_transmission_factor_max     ?
_exptl_transmission_factor_min     ?
_diffrn_reflns_av_R_equivalents    0.0450
_diffrn_reflns_av_unetI/netI       0.0565
_diffrn_reflns_Laue_measured_fraction_full  0.996
_diffrn_reflns_Laue_measured_fraction_max  0.994
_diffrn_reflns_limit_h_max         16
_diffrn_reflns_limit_h_min         -11
_diffrn_reflns_limit_k_max         17
_diffrn_reflns_limit_k_min         -21
_diffrn_reflns_limit_l_max         16
_diffrn_reflns_limit_l_min         -21
_diffrn_reflns_number              12508
_diffrn_reflns_point_group_measured_fraction_full  0.996
_diffrn_reflns_point_group_measured_fraction_max  0.994
_diffrn_reflns_theta_full          25.242
_diffrn_reflns_theta_max           25.996
_diffrn_reflns_theta_min           1.886
_diffrn_ambient_temperature        100
_diffrn_detector_area_resol_mean   ?
_diffrn_measured_fraction_theta_full  0.996
_diffrn_measured_fraction_theta_max  0.994
_diffrn_measurement_device_type    'Bruker D8 Venture'
_diffrn_measurement_method         ?
_diffrn_radiation_type             MoK\a
_diffrn_radiation_wavelength       0.71073
_diffrn_source                     ?
_diffrn_source_current             1.4
_diffrn_source_power               0.07
_diffrn_source_voltage             50.0
_reflns_Friedel_coverage           0.000
_reflns_Friedel_fraction_full      .
_reflns_Friedel_fraction_max       .
_reflns_number_gt                  3081
_reflns_number_total               4079
_reflns_special_details
;
 Reflections were merged by SHELXL according to the crystal
 class for the calculation of statistics and refinement.
 
 _reflns_Friedel_fraction is defined as the number of unique
 Friedel pairs measured divided by the number that would be
 possible theoretically, ignoring centric projections and
 systematic absences.
;
_reflns_threshold_expression       'I > 2\s(I)'
_computing_cell_refinement         'SAINT V8.40A (Bruker, 2019)'
_computing_data_collection         ?
_computing_data_reduction          'SAINT V8.40A (Bruker, 2019)'
_computing_molecular_graphics      'Olex2 1.5 (Dolomanov et al., 2009)'
_computing_publication_material    'Olex2 1.5 (Dolomanov et al., 2009)'
_computing_structure_refinement    'SHELXL 2018/3 (Sheldrick, 2015)'
_computing_structure_solution      'SHELXT 2014/5 (Sheldrick, 2014)'
_refine_diff_density_max           0.934
_refine_diff_density_min           -0.369
_refine_diff_density_rms           0.087
_refine_ls_extinction_coef         .
_refine_ls_extinction_method       none
_refine_ls_goodness_of_fit_ref     1.033
_refine_ls_hydrogen_treatment      constr
_refine_ls_matrix_type             full
_refine_ls_number_parameters       223
_refine_ls_number_reflns           4079
_refine_ls_number_restraints       0
_refine_ls_R_factor_all            0.1095
_refine_ls_R_factor_gt             0.0886
_refine_ls_restrained_S_all        1.033
_refine_ls_shift/su_max            0.000
_refine_ls_shift/su_mean           0.000
_refine_ls_structure_factor_coef   Fsqd
_refine_ls_weighting_details      
 'w=1/[\s^2^(Fo^2^)+(0.1601P)^2^+5.1605P] where P=(Fo^2^+2Fc^2^)/3'
_refine_ls_weighting_scheme        calc
_refine_ls_wR_factor_gt            0.2524
_refine_ls_wR_factor_ref           0.2738
_refine_special_details            ?
_olex2_refinement_description
;
1.a Secondary CH2 refined with riding coordinates:
 C7(H7A,H7B), C9(H9A,H9B), C3(H3A,H3B), C5(H5A,H5B)
1.b Idealised Me refined as rotating group:
 C2(H2A,H2B,H2C), C8(H8A,H8B,H8C), C10(H10A,H10B,H10C), C4(H4A,H4B,H4C),
 C6(H6A,H6B,H6C)
1.c Boron cage BH refined with riding coordinates:
 B2(H2), B3(H3), B4(H4), B5(H5), B6(H6), B7(H7), B8(H8), B9(H9), B10(H10),
 B11(H11), B12(H12)
;
_atom_sites_solution_hydrogens     geom
_atom_sites_solution_primary       ?
_atom_sites_solution_secondary     ?
loop_
  _atom_site_label
  _atom_site_type_symbol
  _atom_site_fract_x
  _atom_site_fract_y
  _atom_site_fract_z
  _atom_site_U_iso_or_equiv
  _atom_site_adp_type
  _atom_site_occupancy
  _atom_site_site_symmetry_order
  _atom_site_calc_flag
  _atom_site_refinement_flags_posn
  _atom_site_refinement_flags_adp
  _atom_site_refinement_flags_occupancy
  _atom_site_disorder_assembly
  _atom_site_disorder_group
 N1 N 0.67887(16) 0.52373(13) 0.48943(12) 0.0229(5) Uani 1 1 d . . . . .
 C1 C 0.66037(19) 0.57776(15) 0.45641(15) 0.0223(6) Uani 1 1 d . . . . .
 C2 C 0.6374(2) 0.64544(16) 0.41340(16) 0.0242(6) Uani 1 1 d . . . . .
 H2A H 0.663234 0.640631 0.361078 0.036 Uiso 1 1 calc R U . . .
 H2B H 0.666853 0.689910 0.438514 0.036 Uiso 1 1 calc R U . . .
 H2C H 0.566472 0.651954 0.411255 0.036 Uiso 1 1 calc R U . . .
 B1 B 0.7043(2) 0.45077(16) 0.53144(16) 0.0168(6) Uani 1 1 d . . . . .
 B2 B 0.8276(2) 0.42370(17) 0.54253(17) 0.0204(6) Uani 1 1 d . . . . .
 H2 H 0.890323 0.458111 0.520148 0.024 Uiso 1 1 calc R U . . .
 B3 B 0.7567(2) 0.45433(15) 0.62407(15) 0.0164(6) Uani 1 1 d . . . . .
 H3 H 0.773007 0.508950 0.654994 0.020 Uiso 1 1 calc R U . . .
 B4 B 0.6342(2) 0.42126(16) 0.61086(16) 0.0166(6) Uani 1 1 d . . . . .
 H4 H 0.570143 0.454232 0.633165 0.020 Uiso 1 1 calc R U . . .
 B5 B 0.6286(2) 0.37022(16) 0.52146(17) 0.0190(6) Uani 1 1 d . . . . .
 H5 H 0.561056 0.369649 0.485209 0.023 Uiso 1 1 calc R U . . .
 B6 B 0.7482(2) 0.37206(16) 0.47956(18) 0.0213(7) Uani 1 1 d . . . . .
 H6 H 0.758991 0.372864 0.415736 0.026 Uiso 1 1 calc R U . . .
 B7 B 0.8337(2) 0.37293(15) 0.63110(17) 0.0180(6) Uani 1 1 d . . . . .
 H7 H 0.901415 0.373514 0.667153 0.022 Uiso 1 1 calc R U . . .
 B8 B 0.7150(2) 0.37165(15) 0.67333(17) 0.0177(6) Uani 1 1 d . . . . .
 H8 H 0.704357 0.371463 0.737182 0.021 Uiso 1 1 calc R U . . .
 B9 B 0.6362(2) 0.32000(16) 0.61001(17) 0.0187(6) Uani 1 1 d . . . . .
 H9 H 0.573362 0.285678 0.632238 0.022 Uiso 1 1 calc R U . . .
 B10 B 0.7063(2) 0.28903(17) 0.52914(18) 0.0221(7) Uani 1 1 d . . . . .
 H10 H 0.689926 0.234470 0.498113 0.026 Uiso 1 1 calc R U . . .
 B11 B 0.8283(2) 0.32207(17) 0.54230(18) 0.0224(7) Uani 1 1 d . . . . .
 H11 H 0.892200 0.289027 0.519904 0.027 Uiso 1 1 calc R U . . .
 B12 B 0.7588(2) 0.29026(15) 0.62297(17) 0.0184(6) Uani 1 1 d . . . . .
 H12 H 0.776864 0.236051 0.654013 0.022 Uiso 1 1 calc R U . . .
 N3 N 0.500000 0.34630(15) 0.250000 0.0115(6) Uani 1 2 d S T P . .
 C7 C 0.58962(16) 0.39523(13) 0.23663(14) 0.0150(5) Uani 1 1 d . . . . .
 H7A H 0.646940 0.361190 0.231790 0.018 Uiso 1 1 calc R U . . .
 H7B H 0.581785 0.422281 0.187037 0.018 Uiso 1 1 calc R U . . .
 C8 C 0.61077(18) 0.45380(14) 0.29859(15) 0.0207(6) Uani 1 1 d . . . . .
 H8A H 0.671009 0.481187 0.285966 0.031 Uiso 1 1 calc R U . . .
 H8B H 0.618418 0.427934 0.348191 0.031 Uiso 1 1 calc R U . . .
 H8C H 0.556573 0.490143 0.301662 0.031 Uiso 1 1 calc R U . . .
 C9 C 0.48913(17) 0.29711(13) 0.17820(13) 0.0159(5) Uani 1 1 d . . . . .
 H9A H 0.483811 0.331320 0.133082 0.019 Uiso 1 1 calc R U . . .
 H9B H 0.549415 0.266647 0.171852 0.019 Uiso 1 1 calc R U . . .
 C10 C 0.4034(2) 0.24340(15) 0.17752(15) 0.0241(6) Uani 1 1 d . . . . .
 H10A H 0.403467 0.214070 0.129530 0.036 Uiso 1 1 calc R U . . .
 H10B H 0.342767 0.272808 0.181278 0.036 Uiso 1 1 calc R U . . .
 H10C H 0.408116 0.208369 0.221296 0.036 Uiso 1 1 calc R U . . .
 N2 N 0.500000 0.90800(17) 0.250000 0.0208(7) Uani 1 2 d S T P . .
 C3 C 0.5899(2) 0.86224(16) 0.2365(2) 0.0320(7) Uani 1 1 d . . . . .
 H3A H 0.646511 0.897292 0.235172 0.038 Uiso 1 1 calc R U . . .
 H3B H 0.584976 0.837613 0.185458 0.038 Uiso 1 1 calc R U . . .
 C4 C 0.6092(2) 0.80064(16) 0.29672(18) 0.0297(7) Uani 1 1 d . . . . .
 H4A H 0.670810 0.774811 0.285019 0.045 Uiso 1 1 calc R U . . .
 H4B H 0.555857 0.763382 0.296040 0.045 Uiso 1 1 calc R U . . .
 H4C H 0.613223 0.824177 0.347743 0.045 Uiso 1 1 calc R U . . .
 C5 C 0.5103(2) 0.95864(17) 0.32178(19) 0.0340(7) Uani 1 1 d . . . . .
 H5A H 0.449730 0.988966 0.327326 0.041 Uiso 1 1 calc R U . . .
 H5B H 0.515099 0.924956 0.367330 0.041 Uiso 1 1 calc R U . . .
 C6 C 0.5959(2) 1.01298(16) 0.32300(18) 0.0309(7) Uani 1 1 d . . . . .
 H6A H 0.590958 1.048316 0.279481 0.046 Uiso 1 1 calc R U . . .
 H6B H 0.656746 0.983911 0.319105 0.046 Uiso 1 1 calc R U . . .
 H6C H 0.595443 1.041951 0.371208 0.046 Uiso 1 1 calc R U . . .

loop_
  _atom_site_aniso_label
  _atom_site_aniso_U_11
  _atom_site_aniso_U_22
  _atom_site_aniso_U_33
  _atom_site_aniso_U_23
  _atom_site_aniso_U_13
  _atom_site_aniso_U_12
 N1 0.0257(12) 0.0245(12) 0.0184(11) 0.0002(9) -0.0005(9) 0.0048(9)
 C1 0.0212(13) 0.0266(14) 0.0190(13) -0.0029(11) -0.0017(10) 0.0028(11)
 C2 0.0244(13) 0.0266(14) 0.0216(13) 0.0024(11) -0.0035(11) 0.0041(11)
 B1 0.0214(14) 0.0161(14) 0.0130(12) 0.0000(10) -0.0008(10) 0.0048(11)
 B2 0.0206(14) 0.0200(14) 0.0205(14) -0.0001(12) 0.0010(11) 0.0026(11)
 B3 0.0206(14) 0.0144(13) 0.0143(13) -0.0016(10) -0.0010(11) 0.0012(10)
 B4 0.0176(13) 0.0165(13) 0.0157(13) -0.0017(11) 0.0002(10) 0.0035(10)
 B5 0.0173(14) 0.0217(15) 0.0180(14) -0.0038(11) -0.0033(11) 0.0031(11)
 B6 0.0195(14) 0.0278(16) 0.0165(14) -0.0079(11) -0.0003(11) 0.0066(12)
 B7 0.0186(14) 0.0151(14) 0.0204(15) -0.0007(11) -0.0038(11) 0.0009(10)
 B8 0.0190(14) 0.0172(14) 0.0169(14) 0.0011(11) -0.0031(11) 0.0021(10)
 B9 0.0169(13) 0.0149(14) 0.0242(14) 0.0015(11) -0.0037(11) 0.0013(10)
 B10 0.0191(14) 0.0201(15) 0.0270(15) -0.0089(12) -0.0065(11) 0.0054(11)
 B11 0.0206(14) 0.0209(15) 0.0257(15) -0.0077(12) -0.0014(12) 0.0075(11)
 B12 0.0184(13) 0.0122(13) 0.0246(15) -0.0029(11) -0.0078(11) 0.0023(10)
 N3 0.0120(13) 0.0111(13) 0.0114(13) 0.000 0.0029(10) 0.000
 C7 0.0113(11) 0.0154(12) 0.0184(12) -0.0002(9) 0.0045(9) -0.0015(9)
 C8 0.0164(12) 0.0201(13) 0.0255(14) -0.0011(10) -0.0016(10) -0.0058(10)
 C9 0.0222(12) 0.0142(12) 0.0112(11) -0.0019(9) 0.0007(9) 0.0019(9)
 C10 0.0270(14) 0.0223(14) 0.0229(13) -0.0044(11) -0.0043(11) -0.0050(11)
 N2 0.0142(14) 0.0133(14) 0.0350(18) 0.000 0.0031(12) 0.000
 C3 0.0177(14) 0.0283(15) 0.050(2) 0.0013(13) 0.0137(13) 0.0012(11)
 C4 0.0230(13) 0.0245(14) 0.0417(17) -0.0026(12) -0.0080(12) 0.0023(11)
 C5 0.0306(15) 0.0326(16) 0.0390(18) -0.0076(13) 0.0047(13) -0.0001(13)
 C6 0.0288(15) 0.0237(15) 0.0401(17) -0.0028(13) -0.0009(13) -0.0043(12)

_geom_special_details
;
 All esds (except the esd in the dihedral angle between two l.s. planes)
 are estimated using the full covariance matrix.  The cell esds are taken
 into account individually in the estimation of esds in distances, angles
 and torsion angles; correlations between esds in cell parameters are only
 used when they are defined by crystal symmetry.  An approximate (isotropic)
 treatment of cell esds is used for estimating esds involving l.s. planes.
;
loop_
  _geom_bond_atom_site_label_1
  _geom_bond_atom_site_label_2
  _geom_bond_distance
  _geom_bond_site_symmetry_2
  _geom_bond_publ_flag
 N1 C1 1.136(3) . ?
 N1 B1 1.513(3) . ?
 C1 C2 1.437(4) . ?
 C2 H2A 0.9800 . ?
 C2 H2B 0.9800 . ?
 C2 H2C 0.9800 . ?
 B1 B2 1.766(4) . ?
 B1 B3 1.765(4) . ?
 B1 B4 1.761(4) . ?
 B1 B5 1.761(4) . ?
 B1 B6 1.754(4) . ?
 B2 H2 1.1200 . ?
 B2 B3 1.801(4) . ?
 B2 B6 1.790(4) . ?
 B2 B7 1.781(4) . ?
 B2 B11 1.780(4) . ?
 B3 H3 1.1200 . ?
 B3 B4 1.792(4) . ?
 B3 B7 1.779(4) . ?
 B3 B8 1.777(4) . ?
 B4 H4 1.1200 . ?
 B4 B5 1.795(4) . ?
 B4 B8 1.779(4) . ?
 B4 B9 1.774(4) . ?
 B5 H5 1.1200 . ?
 B5 B6 1.795(4) . ?
 B5 B9 1.777(4) . ?
 B5 B10 1.782(4) . ?
 B6 H6 1.1200 . ?
 B6 B10 1.786(4) . ?
 B6 B11 1.779(4) . ?
 B7 H7 1.1200 . ?
 B7 B8 1.786(4) . ?
 B7 B11 1.785(4) . ?
 B7 B12 1.782(4) . ?
 B8 H8 1.1200 . ?
 B8 B9 1.788(4) . ?
 B8 B12 1.778(4) . ?
 B9 H9 1.1200 . ?
 B9 B10 1.787(4) . ?
 B9 B12 1.773(4) . ?
 B10 H10 1.1200 . ?
 B10 B11 1.785(4) . ?
 B10 B12 1.784(4) . ?
 B11 H11 1.1200 . ?
 B11 B12 1.785(4) . ?
 B12 H12 1.1200 . ?
 N3 C7 1.516(3) . ?
 N3 C7 1.516(3) 3_655 ?
 N3 C9 1.524(3) . ?
 N3 C9 1.524(3) 3_655 ?
 C7 H7A 0.9900 . ?
 C7 H7B 0.9900 . ?
 C7 C8 1.516(3) . ?
 C8 H8A 0.9800 . ?
 C8 H8B 0.9800 . ?
 C8 H8C 0.9800 . ?
 C9 H9A 0.9900 . ?
 C9 H9B 0.9900 . ?
 C9 C10 1.506(3) . ?
 C10 H10A 0.9800 . ?
 C10 H10B 0.9800 . ?
 C10 H10C 0.9800 . ?
 N2 C3 1.489(3) . ?
 N2 C3 1.489(3) 3_655 ?
 N2 C5 1.538(3) . ?
 N2 C5 1.538(3) 3_655 ?
 C3 H3A 0.9900 . ?
 C3 H3B 0.9900 . ?
 C3 C4 1.526(4) . ?
 C4 H4A 0.9800 . ?
 C4 H4B 0.9800 . ?
 C4 H4C 0.9800 . ?
 C5 H5A 0.9900 . ?
 C5 H5B 0.9900 . ?
 C5 C6 1.511(4) . ?
 C6 H6A 0.9800 . ?
 C6 H6B 0.9800 . ?
 C6 H6C 0.9800 . ?

loop_
  _geom_angle_atom_site_label_1
  _geom_angle_atom_site_label_2
  _geom_angle_atom_site_label_3
  _geom_angle
  _geom_angle_site_symmetry_1
  _geom_angle_site_symmetry_3
  _geom_angle_publ_flag
 C1 N1 B1 178.5(3) . . ?
 N1 C1 C2 179.0(3) . . ?
 C1 C2 H2A 109.5 . . ?
 C1 C2 H2B 109.5 . . ?
 C1 C2 H2C 109.5 . . ?
 H2A C2 H2B 109.5 . . ?
 H2A C2 H2C 109.5 . . ?
 H2B C2 H2C 109.5 . . ?
 N1 B1 B2 120.0(2) . . ?
 N1 B1 B3 120.3(2) . . ?
 N1 B1 B4 120.0(2) . . ?
 N1 B1 B5 119.5(2) . . ?
 N1 B1 B6 119.6(2) . . ?
 B3 B1 B2 61.35(16) . . ?
 B4 B1 B2 111.01(19) . . ?
 B4 B1 B3 61.09(16) . . ?
 B5 B1 B2 111.1(2) . . ?
 B5 B1 B3 111.0(2) . . ?
 B5 B1 B4 61.29(16) . . ?
 B6 B1 B2 61.14(16) . . ?
 B6 B1 B3 111.0(2) . . ?
 B6 B1 B4 111.1(2) . . ?
 B6 B1 B5 61.41(16) . . ?
 B1 B2 H2 123.5 . . ?
 B1 B2 B3 59.29(16) . . ?
 B1 B2 B6 59.10(16) . . ?
 B1 B2 B7 105.9(2) . . ?
 B1 B2 B11 105.9(2) . . ?
 B3 B2 H2 121.9 . . ?
 B6 B2 H2 121.8 . . ?
 B6 B2 B3 107.7(2) . . ?
 B7 B2 H2 122.2 . . ?
 B7 B2 B3 59.55(16) . . ?
 B7 B2 B6 107.8(2) . . ?
 B11 B2 H2 122.2 . . ?
 B11 B2 B3 107.6(2) . . ?
 B11 B2 B6 59.77(16) . . ?
 B11 B2 B7 60.15(16) . . ?
 B1 B3 B2 59.35(15) . . ?
 B1 B3 H3 123.4 . . ?
 B1 B3 B4 59.35(15) . . ?
 B1 B3 B7 106.02(19) . . ?
 B1 B3 B8 106.29(19) . . ?
 B2 B3 H3 121.6 . . ?
 B4 B3 B2 107.99(19) . . ?
 B4 B3 H3 121.7 . . ?
 B7 B3 B2 59.65(16) . . ?
 B7 B3 H3 122.2 . . ?
 B7 B3 B4 107.85(19) . . ?
 B8 B3 B2 108.09(19) . . ?
 B8 B3 H3 121.9 . . ?
 B8 B3 B4 59.79(16) . . ?
 B8 B3 B7 60.31(16) . . ?
 B1 B4 B3 59.56(15) . . ?
 B1 B4 H4 123.3 . . ?
 B1 B4 B5 59.35(16) . . ?
 B1 B4 B8 106.37(19) . . ?
 B1 B4 B9 106.15(19) . . ?
 B3 B4 H4 121.6 . . ?
 B3 B4 B5 108.19(19) . . ?
 B5 B4 H4 121.6 . . ?
 B8 B4 B3 59.69(15) . . ?
 B8 B4 H4 121.9 . . ?
 B8 B4 B5 108.21(19) . . ?
 B9 B4 B3 108.01(18) . . ?
 B9 B4 H4 122.1 . . ?
 B9 B4 B5 59.71(16) . . ?
 B9 B4 B8 60.44(15) . . ?
 B1 B5 B4 59.36(15) . . ?
 B1 B5 H5 123.4 . . ?
 B1 B5 B6 59.10(16) . . ?
 B1 B5 B9 106.04(19) . . ?
 B1 B5 B10 106.2(2) . . ?
 B4 B5 H5 121.8 . . ?
 B6 B5 B4 107.68(19) . . ?
 B6 B5 H5 121.8 . . ?
 B9 B5 B4 59.55(16) . . ?
 B9 B5 H5 122.2 . . ?
 B9 B5 B6 107.9(2) . . ?
 B9 B5 B10 60.29(16) . . ?
 B10 B5 B4 107.9(2) . . ?
 B10 B5 H5 121.9 . . ?
 B10 B5 B6 59.91(16) . . ?
 B1 B6 B2 59.76(16) . . ?
 B1 B6 B5 59.48(15) . . ?
 B1 B6 H6 123.1 . . ?
 B1 B6 B10 106.4(2) . . ?
 B1 B6 B11 106.4(2) . . ?
 B2 B6 B5 108.5(2) . . ?
 B2 B6 H6 121.3 . . ?
 B5 B6 H6 121.6 . . ?
 B10 B6 B2 108.2(2) . . ?
 B10 B6 B5 59.69(16) . . ?
 B10 B6 H6 122.1 . . ?
 B11 B6 B2 59.84(17) . . ?
 B11 B6 B5 107.8(2) . . ?
 B11 B6 H6 122.1 . . ?
 B11 B6 B10 60.11(17) . . ?
 B2 B7 H7 121.3 . . ?
 B2 B7 B8 108.60(19) . . ?
 B2 B7 B11 59.91(17) . . ?
 B2 B7 B12 108.1(2) . . ?
 B3 B7 B2 60.80(15) . . ?
 B3 B7 H7 121.6 . . ?
 B3 B7 B8 59.80(15) . . ?
 B3 B7 B11 108.4(2) . . ?
 B3 B7 B12 107.7(2) . . ?
 B8 B7 H7 121.7 . . ?
 B11 B7 H7 121.6 . . ?
 B11 B7 B8 108.1(2) . . ?
 B12 B7 H7 122.0 . . ?
 B12 B7 B8 59.77(16) . . ?
 B12 B7 B11 60.09(16) . . ?
 B3 B8 B4 60.52(15) . . ?
 B3 B8 B7 59.90(16) . . ?
 B3 B8 H8 121.5 . . ?
 B3 B8 B9 108.0(2) . . ?
 B3 B8 B12 107.9(2) . . ?
 B4 B8 B7 108.1(2) . . ?
 B4 B8 H8 121.7 . . ?
 B4 B8 B9 59.64(16) . . ?
 B7 B8 H8 121.8 . . ?
 B7 B8 B9 107.7(2) . . ?
 B9 B8 H8 122.0 . . ?
 B12 B8 B4 107.53(19) . . ?
 B12 B8 B7 59.99(16) . . ?
 B12 B8 H8 122.0 . . ?
 B12 B8 B9 59.64(15) . . ?
 B4 B9 B5 60.74(15) . . ?
 B4 B9 B8 59.92(15) . . ?
 B4 B9 H9 121.4 . . ?
 B4 B9 B10 108.6(2) . . ?
 B5 B9 B8 108.61(19) . . ?
 B5 B9 H9 121.3 . . ?
 B5 B9 B10 60.00(16) . . ?
 B8 B9 H9 121.6 . . ?
 B10 B9 B8 108.3(2) . . ?
 B10 B9 H9 121.5 . . ?
 B12 B9 B4 107.94(19) . . ?
 B12 B9 B5 108.2(2) . . ?
 B12 B9 B8 59.88(15) . . ?
 B12 B9 H9 121.9 . . ?
 B12 B9 B10 60.13(16) . . ?
 B5 B10 B6 60.40(16) . . ?
 B5 B10 B9 59.71(16) . . ?
 B5 B10 H10 121.7 . . ?
 B5 B10 B11 108.1(2) . . ?
 B5 B10 B12 107.47(19) . . ?
 B6 B10 B9 107.79(19) . . ?
 B6 B10 H10 121.8 . . ?
 B9 B10 H10 122.1 . . ?
 B11 B10 B6 59.76(17) . . ?
 B11 B10 B9 107.7(2) . . ?
 B11 B10 H10 121.7 . . ?
 B12 B10 B6 107.6(2) . . ?
 B12 B10 B9 59.54(16) . . ?
 B12 B10 H10 122.1 . . ?
 B12 B10 B11 60.04(17) . . ?
 B2 B11 B7 59.93(15) . . ?
 B2 B11 B10 108.63(19) . . ?
 B2 B11 H11 121.4 . . ?
 B2 B11 B12 107.90(19) . . ?
 B6 B11 B2 60.39(16) . . ?
 B6 B11 B7 108.11(19) . . ?
 B6 B11 B10 60.14(17) . . ?
 B6 B11 H11 121.6 . . ?
 B6 B11 B12 107.8(2) . . ?
 B7 B11 B10 108.2(2) . . ?
 B7 B11 H11 121.7 . . ?
 B7 B11 B12 59.87(16) . . ?
 B10 B11 H11 121.4 . . ?
 B10 B11 B12 59.94(17) . . ?
 B12 B11 H11 122.0 . . ?
 B7 B12 B10 108.4(2) . . ?
 B7 B12 B11 60.04(17) . . ?
 B7 B12 H12 121.5 . . ?
 B8 B12 B7 60.25(16) . . ?
 B8 B12 B10 108.92(19) . . ?
 B8 B12 B11 108.49(19) . . ?
 B8 B12 H12 121.1 . . ?
 B9 B12 B7 108.54(19) . . ?
 B9 B12 B8 60.48(16) . . ?
 B9 B12 B10 60.32(16) . . ?
 B9 B12 B11 108.3(2) . . ?
 B9 B12 H12 121.4 . . ?
 B10 B12 B11 60.02(17) . . ?
 B10 B12 H12 121.3 . . ?
 B11 B12 H12 121.7 . . ?
 C7 N3 C7 111.2(2) 3_655 . ?
 C7 N3 C9 111.46(13) 3_655 . ?
 C7 N3 C9 111.46(13) . 3_655 ?
 C7 N3 C9 105.85(12) 3_655 3_655 ?
 C7 N3 C9 105.85(12) . . ?
 C9 N3 C9 111.2(2) 3_655 . ?
 N3 C7 H7A 108.4 . . ?
 N3 C7 H7B 108.4 . . ?
 H7A C7 H7B 107.5 . . ?
 C8 C7 N3 115.38(18) . . ?
 C8 C7 H7A 108.4 . . ?
 C8 C7 H7B 108.4 . . ?
 C7 C8 H8A 109.5 . . ?
 C7 C8 H8B 109.5 . . ?
 C7 C8 H8C 109.5 . . ?
 H8A C8 H8B 109.5 . . ?
 H8A C8 H8C 109.5 . . ?
 H8B C8 H8C 109.5 . . ?
 N3 C9 H9A 108.3 . . ?
 N3 C9 H9B 108.3 . . ?
 H9A C9 H9B 107.4 . . ?
 C10 C9 N3 115.84(18) . . ?
 C10 C9 H9A 108.3 . . ?
 C10 C9 H9B 108.3 . . ?
 C9 C10 H10A 109.5 . . ?
 C9 C10 H10B 109.5 . . ?
 C9 C10 H10C 109.5 . . ?
 H10A C10 H10B 109.5 . . ?
 H10A C10 H10C 109.5 . . ?
 H10B C10 H10C 109.5 . . ?
 C3 N2 C3 114.9(3) 3_655 . ?
 C3 N2 C5 111.25(18) . . ?
 C3 N2 C5 104.99(17) . 3_655 ?
 C3 N2 C5 104.99(17) 3_655 . ?
 C3 N2 C5 111.24(18) 3_655 3_655 ?
 C5 N2 C5 109.5(3) 3_655 . ?
 N2 C3 H3A 108.6 . . ?
 N2 C3 H3B 108.6 . . ?
 N2 C3 C4 114.6(2) . . ?
 H3A C3 H3B 107.6 . . ?
 C4 C3 H3A 108.6 . . ?
 C4 C3 H3B 108.6 . . ?
 C3 C4 H4A 109.5 . . ?
 C3 C4 H4B 109.5 . . ?
 C3 C4 H4C 109.5 . . ?
 H4A C4 H4B 109.5 . . ?
 H4A C4 H4C 109.5 . . ?
 H4B C4 H4C 109.5 . . ?
 N2 C5 H5A 108.2 . . ?
 N2 C5 H5B 108.2 . . ?
 H5A C5 H5B 107.3 . . ?
 C6 C5 N2 116.5(2) . . ?
 C6 C5 H5A 108.2 . . ?
 C6 C5 H5B 108.2 . . ?
 C5 C6 H6A 109.5 . . ?
 C5 C6 H6B 109.5 . . ?
 C5 C6 H6C 109.5 . . ?
 H6A C6 H6B 109.5 . . ?
 H6A C6 H6C 109.5 . . ?
 H6B C6 H6C 109.5 . . ?

loop_
  _geom_torsion_atom_site_label_1
  _geom_torsion_atom_site_label_2
  _geom_torsion_atom_site_label_3
  _geom_torsion_atom_site_label_4
  _geom_torsion
  _geom_torsion_site_symmetry_1
  _geom_torsion_site_symmetry_2
  _geom_torsion_site_symmetry_3
  _geom_torsion_site_symmetry_4
  _geom_torsion_publ_flag
 N1 B1 B2 B3 110.4(2) . . . . ?
 N1 B1 B2 B6 -109.5(3) . . . . ?
 N1 B1 B2 B7 149.0(2) . . . . ?
 N1 B1 B2 B11 -148.2(2) . . . . ?
 N1 B1 B3 B2 -109.9(3) . . . . ?
 N1 B1 B3 B4 109.8(3) . . . . ?
 N1 B1 B3 B7 -148.6(2) . . . . ?
 N1 B1 B3 B8 148.4(2) . . . . ?
 N1 B1 B4 B3 -110.3(3) . . . . ?
 N1 B1 B4 B5 109.4(3) . . . . ?
 N1 B1 B4 B8 -148.8(2) . . . . ?
 N1 B1 B4 B9 148.0(2) . . . . ?
 N1 B1 B5 B4 -110.2(2) . . . . ?
 N1 B1 B5 B6 109.8(2) . . . . ?
 N1 B1 B5 B9 -148.7(2) . . . . ?
 N1 B1 B5 B10 148.3(2) . . . . ?
 N1 B1 B6 B2 110.1(3) . . . . ?
 N1 B1 B6 B5 -109.6(3) . . . . ?
 N1 B1 B6 B10 -148.1(2) . . . . ?
 N1 B1 B6 B11 149.0(2) . . . . ?
 B1 B2 B3 B4 35.37(18) . . . . ?
 B1 B2 B3 B7 135.9(2) . . . . ?
 B1 B2 B3 B8 98.6(2) . . . . ?
 B1 B2 B6 B5 -35.49(18) . . . . ?
 B1 B2 B6 B10 -98.7(2) . . . . ?
 B1 B2 B6 B11 -135.8(2) . . . . ?
 B1 B2 B7 B3 -38.44(18) . . . . ?
 B1 B2 B7 B8 -1.2(2) . . . . ?
 B1 B2 B7 B11 99.5(2) . . . . ?
 B1 B2 B7 B12 62.1(2) . . . . ?
 B1 B2 B11 B6 38.42(19) . . . . ?
 B1 B2 B11 B7 -99.5(2) . . . . ?
 B1 B2 B11 B10 1.2(3) . . . . ?
 B1 B2 B11 B12 -62.3(2) . . . . ?
 B1 B3 B4 B5 35.36(18) . . . . ?
 B1 B3 B4 B8 136.2(2) . . . . ?
 B1 B3 B4 B9 98.5(2) . . . . ?
 B1 B3 B7 B2 38.49(19) . . . . ?
 B1 B3 B7 B8 -99.9(2) . . . . ?
 B1 B3 B7 B11 0.8(3) . . . . ?
 B1 B3 B7 B12 -62.7(2) . . . . ?
 B1 B3 B8 B4 -38.30(18) . . . . ?
 B1 B3 B8 B7 99.5(2) . . . . ?
 B1 B3 B8 B9 -0.9(2) . . . . ?
 B1 B3 B8 B12 62.1(2) . . . . ?
 B1 B4 B5 B6 35.39(18) . . . . ?
 B1 B4 B5 B9 136.1(2) . . . . ?
 B1 B4 B5 B10 98.6(2) . . . . ?
 B1 B4 B8 B3 38.42(18) . . . . ?
 B1 B4 B8 B7 0.7(2) . . . . ?
 B1 B4 B8 B9 -99.6(2) . . . . ?
 B1 B4 B8 B12 -62.7(2) . . . . ?
 B1 B4 B9 B5 -38.38(18) . . . . ?
 B1 B4 B9 B8 100.0(2) . . . . ?
 B1 B4 B9 B10 -0.9(2) . . . . ?
 B1 B4 B9 B12 62.8(2) . . . . ?
 B1 B5 B6 B2 35.61(18) . . . . ?
 B1 B5 B6 B10 136.3(2) . . . . ?
 B1 B5 B6 B11 98.9(2) . . . . ?
 B1 B5 B9 B4 38.37(18) . . . . ?
 B1 B5 B9 B8 1.0(3) . . . . ?
 B1 B5 B9 B10 -99.8(2) . . . . ?
 B1 B5 B9 B12 -62.5(2) . . . . ?
 B1 B5 B10 B6 -38.12(19) . . . . ?
 B1 B5 B10 B9 99.5(2) . . . . ?
 B1 B5 B10 B11 -0.8(3) . . . . ?
 B1 B5 B10 B12 62.6(3) . . . . ?
 B1 B6 B10 B5 38.33(19) . . . . ?
 B1 B6 B10 B9 0.7(3) . . . . ?
 B1 B6 B10 B11 -99.9(2) . . . . ?
 B1 B6 B10 B12 -62.2(2) . . . . ?
 B1 B6 B11 B2 -38.86(19) . . . . ?
 B1 B6 B11 B7 -1.3(3) . . . . ?
 B1 B6 B11 B10 99.7(2) . . . . ?
 B1 B6 B11 B12 62.0(2) . . . . ?
 B2 B1 B3 B4 -140.2(2) . . . . ?
 B2 B1 B3 B7 -38.63(19) . . . . ?
 B2 B1 B3 B8 -101.7(2) . . . . ?
 B2 B1 B4 B3 36.99(19) . . . . ?
 B2 B1 B4 B5 -103.3(2) . . . . ?
 B2 B1 B4 B8 -1.5(3) . . . . ?
 B2 B1 B4 B9 -64.7(2) . . . . ?
 B2 B1 B5 B4 103.1(2) . . . . ?
 B2 B1 B5 B6 -36.9(2) . . . . ?
 B2 B1 B5 B9 64.6(2) . . . . ?
 B2 B1 B5 B10 1.6(3) . . . . ?
 B2 B1 B6 B5 140.3(2) . . . . ?
 B2 B1 B6 B10 101.8(2) . . . . ?
 B2 B1 B6 B11 38.90(19) . . . . ?
 B2 B3 B4 B1 -35.38(18) . . . . ?
 B2 B3 B4 B5 0.0(2) . . . . ?
 B2 B3 B4 B8 100.9(2) . . . . ?
 B2 B3 B4 B9 63.1(2) . . . . ?
 B2 B3 B7 B8 -138.4(2) . . . . ?
 B2 B3 B7 B11 -37.69(19) . . . . ?
 B2 B3 B7 B12 -101.2(2) . . . . ?
 B2 B3 B8 B4 -100.7(2) . . . . ?
 B2 B3 B8 B7 37.05(18) . . . . ?
 B2 B3 B8 B9 -63.3(2) . . . . ?
 B2 B3 B8 B12 -0.3(3) . . . . ?
 B2 B6 B10 B5 101.2(2) . . . . ?
 B2 B6 B10 B9 63.5(2) . . . . ?
 B2 B6 B10 B11 -37.01(19) . . . . ?
 B2 B6 B10 B12 0.7(3) . . . . ?
 B2 B6 B11 B7 37.6(2) . . . . ?
 B2 B6 B11 B10 138.6(2) . . . . ?
 B2 B6 B11 B12 100.9(2) . . . . ?
 B2 B7 B8 B3 -37.68(18) . . . . ?
 B2 B7 B8 B4 0.3(2) . . . . ?
 B2 B7 B8 B9 63.3(2) . . . . ?
 B2 B7 B8 B12 100.5(2) . . . . ?
 B2 B7 B11 B6 -37.8(2) . . . . ?
 B2 B7 B11 B10 -101.4(2) . . . . ?
 B2 B7 B11 B12 -138.3(2) . . . . ?
 B2 B7 B12 B8 -101.4(2) . . . . ?
 B2 B7 B12 B9 -63.6(3) . . . . ?
 B2 B7 B12 B10 0.3(3) . . . . ?
 B2 B7 B12 B11 37.26(19) . . . . ?
 B2 B11 B12 B7 -37.23(18) . . . . ?
 B2 B11 B12 B8 -0.1(3) . . . . ?
 B2 B11 B12 B9 64.1(2) . . . . ?
 B2 B11 B12 B10 101.6(2) . . . . ?
 B3 B1 B2 B6 140.1(2) . . . . ?
 B3 B1 B2 B7 38.56(18) . . . . ?
 B3 B1 B2 B11 101.4(2) . . . . ?
 B3 B1 B4 B5 -140.3(2) . . . . ?
 B3 B1 B4 B8 -38.48(18) . . . . ?
 B3 B1 B4 B9 -101.7(2) . . . . ?
 B3 B1 B5 B4 36.82(18) . . . . ?
 B3 B1 B5 B6 -103.2(2) . . . . ?
 B3 B1 B5 B9 -1.6(3) . . . . ?
 B3 B1 B5 B10 -64.7(3) . . . . ?
 B3 B1 B6 B2 -37.1(2) . . . . ?
 B3 B1 B6 B5 103.2(2) . . . . ?
 B3 B1 B6 B10 64.8(3) . . . . ?
 B3 B1 B6 B11 1.8(3) . . . . ?
 B3 B2 B6 B1 35.37(19) . . . . ?
 B3 B2 B6 B5 -0.1(3) . . . . ?
 B3 B2 B6 B10 -63.4(2) . . . . ?
 B3 B2 B6 B11 -100.5(2) . . . . ?
 B3 B2 B7 B8 37.24(18) . . . . ?
 B3 B2 B7 B11 137.9(2) . . . . ?
 B3 B2 B7 B12 100.6(2) . . . . ?
 B3 B2 B11 B6 100.6(2) . . . . ?
 B3 B2 B11 B7 -37.33(18) . . . . ?
 B3 B2 B11 B10 63.3(2) . . . . ?
 B3 B2 B11 B12 -0.1(2) . . . . ?
 B3 B4 B5 B1 -35.45(18) . . . . ?
 B3 B4 B5 B6 -0.1(2) . . . . ?
 B3 B4 B5 B9 100.7(2) . . . . ?
 B3 B4 B5 B10 63.2(2) . . . . ?
 B3 B4 B8 B7 -37.72(18) . . . . ?
 B3 B4 B8 B9 -138.0(2) . . . . ?
 B3 B4 B8 B12 -101.1(2) . . . . ?
 B3 B4 B9 B5 -101.0(2) . . . . ?
 B3 B4 B9 B8 37.39(18) . . . . ?
 B3 B4 B9 B10 -63.4(2) . . . . ?
 B3 B4 B9 B12 0.2(2) . . . . ?
 B3 B7 B8 B4 38.00(18) . . . . ?
 B3 B7 B8 B9 101.0(2) . . . . ?
 B3 B7 B8 B12 138.2(2) . . . . ?
 B3 B7 B11 B2 38.09(18) . . . . ?
 B3 B7 B11 B6 0.3(3) . . . . ?
 B3 B7 B11 B10 -63.4(3) . . . . ?
 B3 B7 B11 B12 -100.2(2) . . . . ?
 B3 B7 B12 B8 -37.19(19) . . . . ?
 B3 B7 B12 B9 0.6(3) . . . . ?
 B3 B7 B12 B10 64.6(2) . . . . ?
 B3 B7 B12 B11 101.5(2) . . . . ?
 B3 B8 B9 B4 -37.77(18) . . . . ?
 B3 B8 B9 B5 -0.1(3) . . . . ?
 B3 B8 B9 B10 63.6(2) . . . . ?
 B3 B8 B9 B12 100.6(2) . . . . ?
 B3 B8 B12 B7 37.30(19) . . . . ?
 B3 B8 B12 B9 -100.8(2) . . . . ?
 B3 B8 B12 B10 -63.5(3) . . . . ?
 B3 B8 B12 B11 0.2(3) . . . . ?
 B4 B1 B2 B3 -36.88(19) . . . . ?
 B4 B1 B2 B6 103.2(2) . . . . ?
 B4 B1 B2 B7 1.7(3) . . . . ?
 B4 B1 B2 B11 64.5(2) . . . . ?
 B4 B1 B3 B2 140.2(2) . . . . ?
 B4 B1 B3 B7 101.6(2) . . . . ?
 B4 B1 B3 B8 38.51(18) . . . . ?
 B4 B1 B5 B6 -140.0(2) . . . . ?
 B4 B1 B5 B9 -38.45(18) . . . . ?
 B4 B1 B5 B10 -101.5(2) . . . . ?
 B4 B1 B6 B2 -103.1(2) . . . . ?
 B4 B1 B6 B5 37.19(19) . . . . ?
 B4 B1 B6 B10 -1.2(3) . . . . ?
 B4 B1 B6 B11 -64.2(3) . . . . ?
 B4 B3 B7 B2 100.8(2) . . . . ?
 B4 B3 B7 B8 -37.62(18) . . . . ?
 B4 B3 B7 B11 63.1(2) . . . . ?
 B4 B3 B7 B12 -0.4(3) . . . . ?
 B4 B3 B8 B7 137.8(2) . . . . ?
 B4 B3 B8 B9 37.38(18) . . . . ?
 B4 B3 B8 B12 100.4(2) . . . . ?
 B4 B5 B6 B1 -35.50(18) . . . . ?
 B4 B5 B6 B2 0.1(3) . . . . ?
 B4 B5 B6 B10 100.8(2) . . . . ?
 B4 B5 B6 B11 63.4(2) . . . . ?
 B4 B5 B9 B8 -37.36(19) . . . . ?
 B4 B5 B9 B10 -138.2(2) . . . . ?
 B4 B5 B9 B12 -100.8(2) . . . . ?
 B4 B5 B10 B6 -100.5(2) . . . . ?
 B4 B5 B10 B9 37.14(19) . . . . ?
 B4 B5 B10 B11 -63.2(3) . . . . ?
 B4 B5 B10 B12 0.2(3) . . . . ?
 B4 B8 B9 B5 37.71(19) . . . . ?
 B4 B8 B9 B10 101.3(2) . . . . ?
 B4 B8 B9 B12 138.4(2) . . . . ?
 B4 B8 B12 B7 101.2(2) . . . . ?
 B4 B8 B12 B9 -36.94(19) . . . . ?
 B4 B8 B12 B10 0.3(3) . . . . ?
 B4 B8 B12 B11 64.1(2) . . . . ?
 B4 B9 B10 B5 -37.85(18) . . . . ?
 B4 B9 B10 B6 0.1(3) . . . . ?
 B4 B9 B10 B11 63.2(2) . . . . ?
 B4 B9 B10 B12 100.5(2) . . . . ?
 B4 B9 B12 B7 -0.5(3) . . . . ?
 B4 B9 B12 B8 37.17(18) . . . . ?
 B4 B9 B12 B10 -101.6(2) . . . . ?
 B4 B9 B12 B11 -64.2(2) . . . . ?
 B5 B1 B2 B3 -103.1(2) . . . . ?
 B5 B1 B2 B6 37.0(2) . . . . ?
 B5 B1 B2 B7 -64.5(2) . . . . ?
 B5 B1 B2 B11 -1.7(3) . . . . ?
 B5 B1 B3 B2 103.3(2) . . . . ?
 B5 B1 B3 B4 -36.90(19) . . . . ?
 B5 B1 B3 B7 64.7(2) . . . . ?
 B5 B1 B3 B8 1.6(3) . . . . ?
 B5 B1 B4 B3 140.3(2) . . . . ?
 B5 B1 B4 B8 101.8(2) . . . . ?
 B5 B1 B4 B9 38.55(18) . . . . ?
 B5 B1 B6 B2 -140.3(2) . . . . ?
 B5 B1 B6 B10 -38.42(19) . . . . ?
 B5 B1 B6 B11 -101.4(2) . . . . ?
 B5 B4 B8 B3 100.9(2) . . . . ?
 B5 B4 B8 B7 63.1(2) . . . . ?
 B5 B4 B8 B9 -37.16(19) . . . . ?
 B5 B4 B8 B12 -0.2(3) . . . . ?
 B5 B4 B9 B8 138.4(2) . . . . ?
 B5 B4 B9 B10 37.52(19) . . . . ?
 B5 B4 B9 B12 101.2(2) . . . . ?
 B5 B6 B10 B9 -37.68(18) . . . . ?
 B5 B6 B10 B11 -138.2(2) . . . . ?
 B5 B6 B10 B12 -100.5(2) . . . . ?
 B5 B6 B11 B2 -101.4(2) . . . . ?
 B5 B6 B11 B7 -63.8(2) . . . . ?
 B5 B6 B11 B10 37.19(19) . . . . ?
 B5 B6 B11 B12 -0.5(3) . . . . ?
 B5 B9 B10 B6 37.98(19) . . . . ?
 B5 B9 B10 B11 101.1(2) . . . . ?
 B5 B9 B10 B12 138.3(2) . . . . ?
 B5 B9 B12 B7 63.7(2) . . . . ?
 B5 B9 B12 B8 101.4(2) . . . . ?
 B5 B9 B12 B10 -37.31(19) . . . . ?
 B5 B9 B12 B11 0.1(3) . . . . ?
 B5 B10 B11 B2 -0.2(3) . . . . ?
 B5 B10 B11 B6 -37.58(19) . . . . ?
 B5 B10 B11 B7 63.3(3) . . . . ?
 B5 B10 B11 B12 100.1(2) . . . . ?
 B5 B10 B12 B7 -64.3(3) . . . . ?
 B5 B10 B12 B8 -0.3(3) . . . . ?
 B5 B10 B12 B9 37.02(19) . . . . ?
 B5 B10 B12 B11 -101.3(2) . . . . ?
 B6 B1 B2 B3 -140.1(2) . . . . ?
 B6 B1 B2 B7 -101.5(2) . . . . ?
 B6 B1 B2 B11 -38.73(19) . . . . ?
 B6 B1 B3 B2 37.0(2) . . . . ?
 B6 B1 B3 B4 -103.2(2) . . . . ?
 B6 B1 B3 B7 -1.6(3) . . . . ?
 B6 B1 B3 B8 -64.7(2) . . . . ?
 B6 B1 B4 B3 103.0(2) . . . . ?
 B6 B1 B4 B5 -37.24(19) . . . . ?
 B6 B1 B4 B8 64.6(2) . . . . ?
 B6 B1 B4 B9 1.3(3) . . . . ?
 B6 B1 B5 B4 140.0(2) . . . . ?
 B6 B1 B5 B9 101.5(2) . . . . ?
 B6 B1 B5 B10 38.5(2) . . . . ?
 B6 B2 B3 B1 -35.29(19) . . . . ?
 B6 B2 B3 B4 0.1(3) . . . . ?
 B6 B2 B3 B7 100.6(2) . . . . ?
 B6 B2 B3 B8 63.3(2) . . . . ?
 B6 B2 B7 B3 -100.4(2) . . . . ?
 B6 B2 B7 B8 -63.2(2) . . . . ?
 B6 B2 B7 B11 37.45(19) . . . . ?
 B6 B2 B7 B12 0.1(3) . . . . ?
 B6 B2 B11 B7 -137.9(2) . . . . ?
 B6 B2 B11 B10 -37.2(2) . . . . ?
 B6 B2 B11 B12 -100.7(2) . . . . ?
 B6 B5 B9 B4 100.4(2) . . . . ?
 B6 B5 B9 B8 63.1(2) . . . . ?
 B6 B5 B9 B10 -37.78(18) . . . . ?
 B6 B5 B9 B12 -0.4(2) . . . . ?
 B6 B5 B10 B9 137.6(2) . . . . ?
 B6 B5 B10 B11 37.3(2) . . . . ?
 B6 B5 B10 B12 100.7(2) . . . . ?
 B6 B10 B11 B2 37.36(19) . . . . ?
 B6 B10 B11 B7 100.9(2) . . . . ?
 B6 B10 B11 B12 137.7(2) . . . . ?
 B6 B10 B12 B7 -0.6(3) . . . . ?
 B6 B10 B12 B8 63.3(3) . . . . ?
 B6 B10 B12 B9 100.7(2) . . . . ?
 B6 B10 B12 B11 -37.58(18) . . . . ?
 B6 B11 B12 B7 -101.0(2) . . . . ?
 B6 B11 B12 B8 -63.8(2) . . . . ?
 B6 B11 B12 B9 0.3(3) . . . . ?
 B6 B11 B12 B10 37.80(19) . . . . ?
 B7 B2 B3 B1 -135.9(2) . . . . ?
 B7 B2 B3 B4 -100.6(2) . . . . ?
 B7 B2 B3 B8 -37.34(19) . . . . ?
 B7 B2 B6 B1 98.2(2) . . . . ?
 B7 B2 B6 B5 62.7(2) . . . . ?
 B7 B2 B6 B10 -0.5(3) . . . . ?
 B7 B2 B6 B11 -37.6(2) . . . . ?
 B7 B2 B11 B6 137.9(2) . . . . ?
 B7 B2 B11 B10 100.7(2) . . . . ?
 B7 B2 B11 B12 37.20(19) . . . . ?
 B7 B3 B4 B1 -98.4(2) . . . . ?
 B7 B3 B4 B5 -63.0(2) . . . . ?
 B7 B3 B4 B8 37.85(18) . . . . ?
 B7 B3 B4 B9 0.1(2) . . . . ?
 B7 B3 B8 B4 -137.8(2) . . . . ?
 B7 B3 B8 B9 -100.4(2) . . . . ?
 B7 B3 B8 B12 -37.34(19) . . . . ?
 B7 B8 B9 B4 -101.0(2) . . . . ?
 B7 B8 B9 B5 -63.3(2) . . . . ?
 B7 B8 B9 B10 0.3(3) . . . . ?
 B7 B8 B9 B12 37.35(18) . . . . ?
 B7 B8 B12 B9 -138.1(2) . . . . ?
 B7 B8 B12 B10 -100.8(2) . . . . ?
 B7 B8 B12 B11 -37.09(19) . . . . ?
 B7 B11 B12 B8 37.18(18) . . . . ?
 B7 B11 B12 B9 101.3(2) . . . . ?
 B7 B11 B12 B10 138.8(2) . . . . ?
 B8 B3 B4 B1 -136.2(2) . . . . ?
 B8 B3 B4 B5 -100.9(2) . . . . ?
 B8 B3 B4 B9 -37.73(18) . . . . ?
 B8 B3 B7 B2 138.4(2) . . . . ?
 B8 B3 B7 B11 100.7(2) . . . . ?
 B8 B3 B7 B12 37.2(2) . . . . ?
 B8 B4 B5 B1 -98.6(2) . . . . ?
 B8 B4 B5 B6 -63.2(2) . . . . ?
 B8 B4 B5 B9 37.48(19) . . . . ?
 B8 B4 B5 B10 0.0(3) . . . . ?
 B8 B4 B9 B5 -138.4(2) . . . . ?
 B8 B4 B9 B10 -100.8(2) . . . . ?
 B8 B4 B9 B12 -37.15(19) . . . . ?
 B8 B7 B11 B2 101.4(2) . . . . ?
 B8 B7 B11 B6 63.6(3) . . . . ?
 B8 B7 B11 B10 0.0(3) . . . . ?
 B8 B7 B11 B12 -36.88(18) . . . . ?
 B8 B7 B12 B9 37.78(19) . . . . ?
 B8 B7 B12 B10 101.7(2) . . . . ?
 B8 B7 B12 B11 138.7(2) . . . . ?
 B8 B9 B10 B5 -101.4(2) . . . . ?
 B8 B9 B10 B6 -63.4(2) . . . . ?
 B8 B9 B10 B11 -0.3(3) . . . . ?
 B8 B9 B10 B12 36.94(18) . . . . ?
 B8 B9 B12 B7 -37.68(19) . . . . ?
 B8 B9 B12 B10 -138.7(2) . . . . ?
 B8 B9 B12 B11 -101.3(2) . . . . ?
 B9 B4 B5 B1 -136.1(2) . . . . ?
 B9 B4 B5 B6 -100.7(2) . . . . ?
 B9 B4 B5 B10 -37.47(19) . . . . ?
 B9 B4 B8 B3 138.0(2) . . . . ?
 B9 B4 B8 B7 100.3(2) . . . . ?
 B9 B4 B8 B12 36.94(18) . . . . ?
 B9 B5 B6 B1 -98.4(2) . . . . ?
 B9 B5 B6 B2 -62.8(2) . . . . ?
 B9 B5 B6 B10 37.95(18) . . . . ?
 B9 B5 B6 B11 0.6(3) . . . . ?
 B9 B5 B10 B6 -137.6(2) . . . . ?
 B9 B5 B10 B11 -100.3(2) . . . . ?
 B9 B5 B10 B12 -36.94(19) . . . . ?
 B9 B8 B12 B7 138.1(2) . . . . ?
 B9 B8 B12 B10 37.3(2) . . . . ?
 B9 B8 B12 B11 101.0(2) . . . . ?
 B9 B10 B11 B2 -63.3(3) . . . . ?
 B9 B10 B11 B6 -100.7(2) . . . . ?
 B9 B10 B11 B7 0.2(3) . . . . ?
 B9 B10 B11 B12 37.04(19) . . . . ?
 B9 B10 B12 B7 -101.3(2) . . . . ?
 B9 B10 B12 B8 -37.35(19) . . . . ?
 B9 B10 B12 B11 -138.3(2) . . . . ?
 B10 B5 B6 B1 -136.3(2) . . . . ?
 B10 B5 B6 B2 -100.7(2) . . . . ?
 B10 B5 B6 B11 -37.38(19) . . . . ?
 B10 B5 B9 B4 138.2(2) . . . . ?
 B10 B5 B9 B8 100.8(2) . . . . ?
 B10 B5 B9 B12 37.37(18) . . . . ?
 B10 B6 B11 B2 -138.6(2) . . . . ?
 B10 B6 B11 B7 -101.0(2) . . . . ?
 B10 B6 B11 B12 -37.71(19) . . . . ?
 B10 B9 B12 B7 101.0(2) . . . . ?
 B10 B9 B12 B8 138.7(2) . . . . ?
 B10 B9 B12 B11 37.40(19) . . . . ?
 B10 B11 B12 B7 -138.8(2) . . . . ?
 B10 B11 B12 B8 -101.6(2) . . . . ?
 B10 B11 B12 B9 -37.53(19) . . . . ?
 B11 B2 B3 B1 -98.3(2) . . . . ?
 B11 B2 B3 B4 -63.0(2) . . . . ?
 B11 B2 B3 B7 37.60(18) . . . . ?
 B11 B2 B3 B8 0.3(3) . . . . ?
 B11 B2 B6 B1 135.8(2) . . . . ?
 B11 B2 B6 B5 100.4(2) . . . . ?
 B11 B2 B6 B10 37.12(18) . . . . ?
 B11 B2 B7 B3 -137.9(2) . . . . ?
 B11 B2 B7 B8 -100.7(2) . . . . ?
 B11 B2 B7 B12 -37.34(18) . . . . ?
 B11 B6 B10 B5 138.2(2) . . . . ?
 B11 B6 B10 B9 100.5(2) . . . . ?
 B11 B6 B10 B12 37.70(18) . . . . ?
 B11 B7 B8 B3 -101.2(2) . . . . ?
 B11 B7 B8 B4 -63.2(2) . . . . ?
 B11 B7 B8 B9 -0.2(2) . . . . ?
 B11 B7 B8 B12 37.02(18) . . . . ?
 B11 B7 B12 B8 -138.7(2) . . . . ?
 B11 B7 B12 B9 -100.9(2) . . . . ?
 B11 B7 B12 B10 -36.94(19) . . . . ?
 B11 B10 B12 B7 36.95(19) . . . . ?
 B11 B10 B12 B8 100.9(2) . . . . ?
 B11 B10 B12 B9 138.3(2) . . . . ?
 B12 B7 B8 B3 -138.2(2) . . . . ?
 B12 B7 B8 B4 -100.2(2) . . . . ?
 B12 B7 B8 B9 -37.20(18) . . . . ?
 B12 B7 B11 B2 138.3(2) . . . . ?
 B12 B7 B11 B6 100.5(2) . . . . ?
 B12 B7 B11 B10 36.86(19) . . . . ?
 B12 B8 B9 B4 -138.4(2) . . . . ?
 B12 B8 B9 B5 -100.7(2) . . . . ?
 B12 B8 B9 B10 -37.05(19) . . . . ?
 B12 B9 B10 B5 -138.3(2) . . . . ?
 B12 B9 B10 B6 -100.3(2) . . . . ?
 B12 B9 B10 B11 -37.26(19) . . . . ?
 B12 B10 B11 B2 -100.4(2) . . . . ?
 B12 B10 B11 B6 -137.7(2) . . . . ?
 B12 B10 B11 B7 -36.83(18) . . . . ?
 C7 N3 C7 C8 54.34(16) 3_655 . . . ?
 C7 N3 C9 C10 -58.5(3) 3_655 . . . ?
 C7 N3 C9 C10 -179.5(2) . . . . ?
 C9 N3 C7 C8 -63.5(3) 3_655 . . . ?
 C9 N3 C7 C8 175.5(2) . . . . ?
 C9 N3 C9 C10 59.36(17) 3_655 . . . ?
 C3 N2 C3 C4 -50.93(19) 3_655 . . . ?
 C3 N2 C5 C6 56.3(3) . . . . ?
 C3 N2 C5 C6 -178.9(3) 3_655 . . . ?
 C5 N2 C3 C4 -173.5(2) 3_655 . . . ?
 C5 N2 C3 C4 68.1(3) . . . . ?
 C5 N2 C5 C6 -59.4(2) 3_655 . . . ?

_shelx_res_file
;
TITL mo_22kub31_0m_a.res in Pbcn
    mo_22kub31_0m_a.res
    created by SHELXL-2018/3 at 12:17:26 on 08-Sep-2022
REM Old TITL mo_22kub31_0m.hkl
REM SHELXT solution in Pbcn
REM R1 0.184, Rweak 0.004, Alpha 0.028, Orientation a'=-a, b'=c, c'=b
REM Formula found by SHELXT: C11 B11 N2
CELL 0.71073 13.7113 17.515 17.3914 90 90 90
ZERR 8 0.0064 0.0032 0.0045 0 0 0
LATT 1
SYMM 0.5-X,0.5-Y,0.5+Z
SYMM -X,+Y,0.5-Z
SYMM 0.5+X,0.5-Y,-Z
SFAC C H B N
UNIT 80 272 96 16

L.S. 10
PLAN  40
SIZE 0.1 0.2 0.5
TEMP -173.15
CONF
LIST 4
MORE -1
BOND $H
fmap 2
acta
OMIT -2 52
REM <olex2.extras>
REM <HklSrc "%.\\mo_22kub31_0m_a.hkl">
REM </olex2.extras>

WGHT    0.160100    5.160500
FVAR       0.43090
N1    4    0.678873    0.523734    0.489434    11.00000    0.02573    0.02447 =
         0.01839    0.00020   -0.00049    0.00484
C1    1    0.660373    0.577764    0.456412    11.00000    0.02120    0.02656 =
         0.01902   -0.00289   -0.00172    0.00282
C2    1    0.637408    0.645443    0.413396    11.00000    0.02438    0.02655 =
         0.02155    0.00244   -0.00348    0.00409
AFIX 137
H2A   2    0.663234    0.640631    0.361078    11.00000   -1.50000
H2B   2    0.666853    0.689910    0.438514    11.00000   -1.50000
H2C   2    0.566472    0.651954    0.411255    11.00000   -1.50000
AFIX   0
B1    3    0.704340    0.450774    0.531444    11.00000    0.02139    0.01608 =
         0.01302   -0.00003   -0.00084    0.00479
B2    3    0.827596    0.423704    0.542530    11.00000    0.02064    0.02001 =
         0.02054   -0.00009    0.00101    0.00260
AFIX 153
H2    2    0.890323    0.458111    0.520148    11.00000   -1.20000
AFIX   0
B3    3    0.756679    0.454333    0.624074    11.00000    0.02057    0.01443 =
         0.01432   -0.00159   -0.00097    0.00125
AFIX 153
H3    2    0.773007    0.508950    0.654994    11.00000   -1.20000
AFIX   0
B4    3    0.634154    0.421257    0.610859    11.00000    0.01764    0.01645 =
         0.01572   -0.00166    0.00019    0.00349
AFIX 153
H4    2    0.570143    0.454232    0.633165    11.00000   -1.20000
AFIX   0
B5    3    0.628569    0.370224    0.521457    11.00000    0.01729    0.02170 =
         0.01796   -0.00380   -0.00326    0.00313
AFIX 153
H5    2    0.561056    0.369649    0.485209    11.00000   -1.20000
AFIX   0
B6    3    0.748156    0.372063    0.479561    11.00000    0.01953    0.02777 =
         0.01646   -0.00793   -0.00033    0.00661
AFIX 153
H6    2    0.758991    0.372864    0.415736    11.00000   -1.20000
AFIX   0
B7    3    0.833735    0.372935    0.631099    11.00000    0.01858    0.01513 =
         0.02043   -0.00067   -0.00379    0.00094
AFIX 153
H7    2    0.901415    0.373514    0.667153    11.00000   -1.20000
AFIX   0
B8    3    0.715003    0.371655    0.673332    11.00000    0.01900    0.01715 =
         0.01690    0.00114   -0.00306    0.00210
AFIX 153
H8    2    0.704357    0.371463    0.737182    11.00000   -1.20000
AFIX   0
B9    3    0.636250    0.320003    0.610010    11.00000    0.01688    0.01492 =
         0.02416    0.00154   -0.00371    0.00128
AFIX 153
H9    2    0.573362    0.285678    0.632238    11.00000   -1.20000
AFIX   0
B10   3    0.706254    0.289026    0.529143    11.00000    0.01913    0.02011 =
         0.02700   -0.00887   -0.00649    0.00542
AFIX 153
H10   2    0.689926    0.234470    0.498113    11.00000   -1.20000
AFIX   0
B11   3    0.828290    0.322066    0.542296    11.00000    0.02057    0.02089 =
         0.02570   -0.00773   -0.00136    0.00752
AFIX 153
H11   2    0.892200    0.289027    0.519904    11.00000   -1.20000
AFIX   0
B12   3    0.758759    0.290257    0.622974    11.00000    0.01842    0.01225 =
         0.02457   -0.00290   -0.00778    0.00233
AFIX 153
H12   2    0.776864    0.236051    0.654013    11.00000   -1.20000
AFIX   0

N3    4    0.500000    0.346303    0.250000    10.50000    0.01196    0.01110 =
         0.01139    0.00000    0.00293    0.00000
C7    1    0.589623    0.395226    0.236633    11.00000    0.01128    0.01544 =
         0.01842   -0.00016    0.00451   -0.00146
AFIX  23
H7A   2    0.646940    0.361190    0.231790    11.00000   -1.20000
H7B   2    0.581785    0.422281    0.187037    11.00000   -1.20000
AFIX   0
C8    1    0.610775    0.453798    0.298588    11.00000    0.01644    0.02012 =
         0.02552   -0.00106   -0.00163   -0.00585
AFIX 137
H8A   2    0.671009    0.481187    0.285966    11.00000   -1.50000
H8B   2    0.618418    0.427934    0.348191    11.00000   -1.50000
H8C   2    0.556573    0.490143    0.301662    11.00000   -1.50000
AFIX   0
C9    1    0.489130    0.297109    0.178201    11.00000    0.02217    0.01416 =
         0.01123   -0.00194    0.00074    0.00188
AFIX  23
H9A   2    0.483811    0.331320    0.133082    11.00000   -1.20000
H9B   2    0.549415    0.266647    0.171852    11.00000   -1.20000
AFIX   0
C10   1    0.403385    0.243401    0.177517    11.00000    0.02703    0.02235 =
         0.02292   -0.00442   -0.00427   -0.00502
AFIX 137
H10A  2    0.403467    0.214070    0.129530    11.00000   -1.50000
H10B  2    0.342767    0.272808    0.181278    11.00000   -1.50000
H10C  2    0.408116    0.208369    0.221296    11.00000   -1.50000
AFIX   0

N2    4    0.500000    0.907996    0.250000    10.50000    0.01424    0.01329 =
         0.03500    0.00000    0.00307    0.00000
C3    1    0.589895    0.862241    0.236548    11.00000    0.01769    0.02828 =
         0.05014    0.00126    0.01366    0.00116
AFIX  23
H3A   2    0.646511    0.897292    0.235172    11.00000   -1.20000
H3B   2    0.584976    0.837613    0.185458    11.00000   -1.20000
AFIX   0
C4    1    0.609171    0.800642    0.296721    11.00000    0.02296    0.02447 =
         0.04170   -0.00262   -0.00805    0.00226
AFIX 137
H4A   2    0.670810    0.774811    0.285019    11.00000   -1.50000
H4B   2    0.555857    0.763382    0.296040    11.00000   -1.50000
H4C   2    0.613223    0.824177    0.347743    11.00000   -1.50000
AFIX   0
C5    1    0.510255    0.958642    0.321779    11.00000    0.03055    0.03256 =
         0.03903   -0.00763    0.00475   -0.00006
AFIX  23
H5A   2    0.449730    0.988966    0.327326    11.00000   -1.20000
H5B   2    0.515099    0.924956    0.367330    11.00000   -1.20000
AFIX   0
C6    1    0.595877    1.012982    0.323001    11.00000    0.02880    0.02372 =
         0.04014   -0.00279   -0.00092   -0.00432
AFIX 137
H6A   2    0.590958    1.048316    0.279481    11.00000   -1.50000
H6B   2    0.656746    0.983911    0.319105    11.00000   -1.50000
H6C   2    0.595443    1.041951    0.371208    11.00000   -1.50000
AFIX   0
HKLF 4


REM  mo_22kub31_0m_a.res in Pbcn
REM wR2 = 0.2738, GooF = S = 1.033, Restrained GooF = 1.033 for all data
REM R1 = 0.0886 for 3081 Fo > 4sig(Fo) and 0.1095 for all 4079 data
REM 223 parameters refined using 0 restraints

END

WGHT      0.1600      5.1646

REM Highest difference peak  0.934,  deepest hole -0.369,  1-sigma level  0.087
Q1    1   0.4461  0.8801  0.4011  11.00000  0.05    0.93
Q2    1   0.6189  1.0826  0.4217  11.00000  0.05    0.89
Q3    1   0.5170  0.8608  0.3436  11.00000  0.05    0.83
Q4    1   0.5796  1.1041  0.4939  11.00000  0.05    0.79
Q5    1   0.6469  1.0587  0.3663  11.00000  0.05    0.77
Q6    1   0.5035  0.9933  0.2746  11.00000  0.05    0.63
Q7    1   0.6078  0.8925  0.2682  11.00000  0.05    0.51
Q8    1   0.6816  0.7361  0.4891  11.00000  0.05    0.48
Q9    1   0.6801  0.2168  0.4967  11.00000  0.05    0.47
Q10   1   0.6602  0.1646  0.4600  11.00000  0.05    0.42
Q11   1   0.5000  0.3929  0.2500  10.50000  0.05    0.39
Q12   1   0.5933  0.4962  0.3177  11.00000  0.05    0.38
Q13   1   0.6670  0.3283  0.5335  11.00000  0.05    0.36
Q14   1   0.6592  0.3832  0.6278  11.00000  0.05    0.35
Q15   1   0.5066  0.4464  0.3218  11.00000  0.05    0.35
Q16   1   0.5824  0.8831  0.1989  11.00000  0.05    0.34
Q17   1   0.8553  0.3340  0.6081  11.00000  0.05    0.34
Q18   1   0.5983  0.3457  0.2320  11.00000  0.05    0.33
Q19   1   0.5123  0.7893  0.3274  11.00000  0.05    0.31
Q20   1   0.8674  0.4407  0.6105  11.00000  0.05    0.30
Q21   1   0.7779  0.3919  0.6673  11.00000  0.05    0.30
Q22   1   0.7979  0.4677  0.5248  11.00000  0.05    0.30
Q23   1   0.6654  0.4262  0.5416  11.00000  0.05    0.30
Q24   1   0.8638  0.3896  0.5275  11.00000  0.05    0.27
Q25   1   0.6434  0.6880  0.4569  11.00000  0.05    0.26
Q26   1   0.6005  0.7267  0.3309  11.00000  0.05    0.26
Q27   1   0.7275  0.3300  0.5010  11.00000  0.05    0.26
Q28   1   0.3983  0.2766  0.1986  11.00000  0.05    0.26
Q29   1   0.6225  0.6597  0.4190  11.00000  0.05    0.25
Q30   1   0.6096  0.9421  0.2927  11.00000  0.05    0.25
Q31   1   0.4308  0.2707  0.1776  11.00000  0.05    0.25
Q32   1   0.5000  0.8280  0.2500  10.50000  0.05    0.23
Q33   1   0.7304  0.4259  0.5135  11.00000  0.05    0.22
Q34   1   0.7022  0.4521  0.5734  11.00000  0.05    0.22
Q35   1   0.7216  0.2870  0.5599  11.00000  0.05    0.21
Q36   1   0.5944  0.4185  0.2640  11.00000  0.05    0.21
Q37   1   0.8357  0.3664  0.5687  11.00000  0.05    0.20
Q38   1   0.8167  0.3464  0.5163  11.00000  0.05    0.19
Q39   1   0.6356  0.4503  0.3326  11.00000  0.05    0.19
Q40   1   0.4860  0.3208  0.1658  11.00000  0.05    0.18
;
_shelx_res_checksum                31136
_shelx_hkl_file
;
  -2   0   0 1376.15   81.79
   2   0   0 1355.62   81.77
   3   0   0   -0.14    0.80
  -3   0   0   -0.46    0.87
  -4   0   0 5372.90  326.83
   4   0   0 5570.15  326.84
   5   0   0    0.08    0.95
  -5   0   0    0.45    1.14
  -6   0   0   81.47    6.16
   6   0   0   75.31    5.96
   7   0   0    6.37    2.06
  -7   0   0    1.00    1.79
   8   0   0 1719.35  103.98
   9   0   0   -0.96    1.49
  10   0   0  744.34   46.30
  11   0   0   10.89    3.05
  12   0   0 1015.64   62.95
  13   0   0    1.52    2.69
  14   0   0    9.43    3.64
  15   0   0    1.04    2.92
  16   0   0   11.28    4.40
  17   0   0   -0.67    3.28
  18   0   0    7.37    4.50
  19   0   0   -0.62    4.37
   1   0  -1    0.06    0.17
   2   0   1    0.05    0.62
   2   0  -1   -0.51    0.50
  -2   0   1   -0.35    0.48
   3   0   1   -0.46    0.88
  -3   0   1   -0.13    0.73
  -3   0  -1    0.01    0.90
   3   0  -1    0.26    0.73
  -4   0  -1   -0.48    0.82
   4   0  -1    0.29    0.77
   4   0   1   -0.06    0.94
  -4   0   1    0.77    0.92
  -5   0   1    0.65    1.13
   5   0   1    0.39    1.09
   5   0  -1    2.45    1.09
  -5   0  -1   -1.85    0.91
   6   0  -1    2.03    1.50
  -6   0  -1   -1.83    1.70
  -6   0   1   -0.89    1.59
   6   0   1   -0.66    1.60
  -7   0  -1   -1.20    1.72
   7   0  -1    2.84    1.61
   7   0   1    1.10    1.67
  -7   0   1    0.99    1.77
   8   0   1   -3.00    1.52
   8   0  -1   -0.67    1.48
   9   0  -1    0.07    1.67
   9   0   1   -0.27    1.70
  10   0  -1    1.94    2.15
  10   0   1    0.62    2.12
  11   0  -1   -1.80    2.27
  11   0   1   -1.89    2.55
  12   0  -1   -5.30    2.22
  12   0   1   -0.09    2.47
  13   0   1   -1.00    2.64
  13   0  -1    2.15    2.54
  14   0  -1    5.07    3.17
  14   0   1    3.45    2.91
  15   0   1   -0.31    3.04
  15   0  -1   -0.10    2.89
  16   0  -1    1.30    3.26
  16   0   1    7.53    6.74
  17   0   1   -0.10    3.69
  17   0  -1   -1.12    3.58
  18   0   1   -7.32    3.92
  18   0  -1   -5.49    3.70
  19   0   1    5.83    4.79
  19   0  -1   -1.97    4.45
   0   0  -2  814.24   48.95
   0   0   2  817.79   48.96
  -1   0   2 2261.65  137.61
   1   0   2 2343.42  137.55
  -3   0   2 6164.59  368.06
   4   0  -2   -0.05    0.90
   4   0   2    3.39    1.09
  -4   0   2    4.14    1.14
   5   0  -2  228.90   15.05
  -5   0   2  236.15   15.04
   5   0   2  239.80   15.02
  -6   0  -2 2442.99  149.85
   6   0  -2 2455.46  149.38
   6   0   2 2512.26  149.29
  -6   0   2 2532.69  149.41
   7   0  -2   63.79    5.67
  -7   0   2   78.53    6.69
   7   0   2   63.79    5.65
  -7   0  -2   69.88    5.92
   8   0  -2 1194.37   74.44
   8   0   2 1250.28   74.39
   9   0  -2   27.73    4.05
   9   0   2   27.89    3.97
  10   0  -2 1916.40  117.95
  10   0   2 1973.99  117.82
  11   0   2  365.97   25.30
  11   0  -2  353.93   23.75
  12   0  -2  214.33   15.67
  12   0   2  223.33   15.58
  13   0  -2  193.94   14.69
  13   0   2  205.48   14.70
  14   0   2   31.58    5.30
  14   0  -2   34.72    5.56
  15   0  -2   21.03    4.83
  15   0   2   23.55    5.06
  16   0  -2   83.59    8.90
  17   0   2   19.80    5.09
  17   0  -2    8.48    4.31
  18   0  -2   33.12    6.44
  18   0   2   30.51    6.53
  19   0   2   -3.56    4.27
  19   0  -2    3.50    4.30
   0   0   3    0.70    0.54
   0   0  -3    0.72    0.59
  -1   0  -3   -0.39    0.52
   1   0  -3   -0.03    0.59
   1   0   3    0.17    0.55
  -1   0   3   -0.13    0.56
  -2   0   3    0.21    0.68
   2   0  -3    0.16    0.67
   3   0  -3    1.82    0.86
  -3   0   3    0.95    0.76
  -4   0   3    0.39    0.82
   4   0   3   -0.25    0.85
   4   0  -3   -0.15    0.82
   5   0   3    0.57    1.39
   5   0  -3    0.13    1.10
  -5   0   3    1.31    1.32
   6   0  -3   -1.57    1.30
   6   0   3    2.44    1.83
  -6   0   3    2.61    1.57
   7   0  -3   -2.37    1.23
   7   0   3   -1.46    1.46
   8   0   3    1.62    1.64
   8   0  -3    0.35    1.58
   9   0   3    1.84    2.04
   9   0  -3   -2.05    1.43
  10   0   3    0.15    2.24
  11   0   3   -1.80    2.38
  11   0  -3   -1.56    2.14
  12   0  -3   -1.64    2.27
  12   0   3    0.07    2.74
  13   0  -3    0.05    2.46
  13   0   3   -2.28    2.57
  14   0   3    0.79    2.57
  14   0  -3   -3.14    2.43
  15   0   3    1.02    2.76
  15   0  -3    1.52    2.86
  16   0  -3    1.94    3.35
  17   0  -3   -7.35    3.13
  17   0   3    0.60    3.63
  18   0   3   -2.54    3.70
  18   0  -3   -1.63    3.72
  19   0   3   -3.92    4.86
  19   0  -3    4.32    7.86
   0   0   4 1751.05  105.54
   0   0  -4 1769.59  105.56
   1   0  -4 1277.49   76.75
   1   0   4 1276.87   76.65
  -1   0   4 1263.87   76.70
  -1   0  -4 1284.44   76.62
   2   0   4   56.73    3.96
   2   0  -4   56.16    4.13
  -2   0   4   52.64    4.03
  -3   0   4 2892.11  180.60
   3   0  -4 3142.41  181.12
  -4   0   4  120.61    8.35
   4   0  -4  125.33    8.48
   5   0  -4  268.63   17.75
   5   0   4  281.73   17.69
  -5   0   4  278.51   17.69
   6   0   4  281.78   17.63
  -6   0   4  269.36   17.63
   6   0  -4  266.20   17.72
   7   0  -4   62.46    5.30
   7   0   4   52.92    5.06
   8   0  -4  493.18   31.28
   8   0   4  493.71   31.02
   9   0   4   35.61    4.37
   9   0  -4   34.15    4.58
  10   0   4 1340.15   81.37
  10   0  -4 1325.81   81.72
  11   0  -4  694.38   46.75
  11   0   4  795.14   46.77
  12   0  -4   95.48    8.72
  12   0   4  101.98    8.65
  13   0   4  190.49   13.93
  13   0  -4  185.47   14.29
  14   0  -4   18.00    4.44
  14   0   4   18.94    4.39
  15   0   4   20.14    4.58
  16   0  -4    4.73    3.31
  17   0   4   -5.55    3.38
  17   0  -4    1.17    3.50
  18   0  -4   38.27    6.87
  18   0   4   41.34    6.88
  19   0   4   33.54    6.40
  19   0  -4   22.51    8.97
   0   0  -5    0.38    0.63
   0   0   5    0.90    0.65
   1   0  -5    0.44    0.62
  -1   0   5    0.57    0.66
  -1   0  -5    0.17    0.57
   1   0   5    0.47    0.64
   2   0   5   -0.10    0.55
  -2   0  -5   -0.09    0.60
  -2   0   5    0.39    0.61
   2   0  -5    0.30    0.85
  -3   0   5    0.28    0.84
   3   0  -5    0.71    0.89
   3   0   5    0.36    0.73
  -4   0   5    1.79    1.15
   4   0  -5    1.37    1.25
  -5   0   5    8.76    1.93
   5   0  -5    7.95    2.09
   6   0  -5    0.01    1.36
   6   0   5   -0.31    1.70
   7   0  -5    1.36    1.50
   7   0   5    1.28    1.88
   8   0  -5   -1.29    1.52
   8   0   5   -2.74    1.67
   9   0   5   -0.82    1.88
   9   0  -5   -1.19    1.60
  10   0   5   -0.89    2.10
  10   0  -5    2.92    2.31
  11   0  -5    2.68    2.48
  11   0   5    2.09    2.78
  12   0  -5   -0.46    2.16
  12   0   5    5.73    3.18
  13   0   5   -1.39    2.88
  13   0  -5    0.09    2.27
  14   0   5   -0.88    2.95
  14   0  -5    0.26    2.63
  15   0   5   -2.39    3.04
  15   0  -5   -1.65    2.97
  16   0  -5    0.06    3.09
  16   0   5    0.74    4.34
  17   0   5   -0.41    3.41
  17   0  -5    4.31    3.86
  18   0  -5    3.74    3.94
  18   0   5   -0.06    3.99
   0   0   6 3490.30  216.49
   0   0  -6 3745.82  216.97
   1   0  -6 1579.52   93.70
  -1   0   6 1522.76   93.58
   1   0   6 1561.26   93.60
   2   0   6  263.11   16.90
  -2   0  -6  279.60   17.20
   2   0  -6  269.22   17.11
  -2   0   6  259.19   16.96
   3   0  -6  123.65    8.71
   3   0   6  122.96    8.44
  -3   0   6  126.41    8.59
   4   0   6  410.08   25.17
   4   0  -6  406.75   25.51
  -4   0   6  392.86   25.28
   5   0  -6   11.40    2.49
   6   0  -6   64.24    5.68
   7   0   6  756.73   45.91
   7   0  -6  730.20   46.21
   8   0  -6  124.67    9.84
   8   0   6  134.45    9.65
   9   0  -6 1026.08   62.90
   9   0   6 1003.57   62.31
  10   0   6  188.55   13.59
  10   0  -6  190.97   14.00
  11   0  -6  129.33   10.95
  11   0   6  143.62   10.81
  12   0  -6    0.31    2.74
  12   0   6   -0.29    2.58
  13   0   6  217.20   15.62
  13   0  -6  210.79   15.92
  14   0  -6  102.70    9.53
  14   0   6   86.67    8.61
  15   0  -6   96.49    9.62
  15   0   6   95.16    9.27
  16   0   6    5.07    3.58
  16   0  -6   -5.19    3.35
  17   0   6    9.80    4.10
  17   0  -6    6.55    3.96
  18   0  -6   24.49    5.74
  18   0   6   31.04    5.98
   0   0  -7    2.53    1.20
   0   0   7    1.32    1.16
  -1   0  -7    0.65    1.07
  -1   0   7    0.72    1.12
   1   0   7    0.07    1.00
   1   0  -7   -1.37    0.89
  -2   0   7   -1.13    0.94
   2   0   7   -0.40    0.92
  -2   0  -7    1.35    1.17
   2   0  -7    1.22    1.35
  -3   0   7   -0.28    1.21
   3   0  -7    1.25    1.33
   4   0   7   -0.81    1.03
   4   0  -7    1.13    1.47
   5   0  -7   -0.33    1.37
   5   0   7    0.61    1.10
   6   0  -7    0.79    1.46
   7   0  -7    6.95    2.47
   8   0   7   -2.13    1.89
   8   0  -7   -1.36    1.60
   9   0  -7   -0.74    1.91
   9   0   7    2.18    2.41
  10   0   7   -1.62    2.71
  10   0  -7    1.06    2.44
  11   0  -7    2.04    2.76
  11   0   7   -7.02    2.45
  12   0  -7   -3.41    2.23
  12   0   7    1.36    2.93
  13   0   7    3.65    3.23
  13   0  -7   -1.36    2.47
  14   0   7    0.56    3.36
  15   0   7   -2.22    3.22
  15   0  -7   -0.63    3.17
  16   0   7    3.87    3.89
  16   0  -7   -0.39    3.53
  17   0   7   -1.42    3.49
  17   0  -7    2.24    4.03
  18   0  -7   -8.21    7.19
  18   0   7    4.87    4.36
   0   0   8  511.32   31.05
   0   0  -8  485.66   30.98
   1   0  -8  400.32   25.04
  -1   0  -8  404.77   24.91
   1   0   8  404.14   24.96
  -1   0   8  376.32   24.85
  -2   0  -8  681.75   42.12
   2   0   8  698.52   42.31
  -2   0   8  678.80   42.31
   2   0  -8  688.88   42.47
   3   0  -8  204.43   13.59
   3   0   8  195.24   13.26
   4   0  -8  205.19   14.19
   4   0   8  212.21   13.91
   5   0   8  116.39    8.60
   5   0  -8  115.84    8.84
   6   0  -8   14.94    3.01
   7   0  -8   33.69    4.72
   8   0   8   67.83    6.25
   8   0  -8   63.88    6.44
   9   0  -8   51.15    6.14
   9   0   8   69.33    6.36
  10   0  -8  340.92   22.58
  10   0   8  314.73   21.89
  11   0  -8  273.44   19.83
  11   0   8  290.23   19.39
  12   0   8  109.70    9.65
  12   0  -8  107.95    9.96
  13   0  -8  217.55   16.95
  13   0   8  229.25   16.32
  14   0   8   -0.07    3.59
  14   0  -8    8.67    3.86
  15   0   8   63.32    7.68
  15   0  -8   51.88    7.54
  16   0  -8  102.04   11.26
  16   0   8  124.27   10.65
  17   0   8   38.54    6.20
  17   0  -8   43.40    7.30
  18   0  -8  162.38   14.41
  18   0   8  129.43   12.98
   0   0   9   -1.28    1.23
   0   0  -9    1.17    1.32
  -1   0  -9    0.19    1.14
   1   0  -9    0.93    1.48
   1   0   9   -1.03    1.15
   2   0  -9    0.12    1.40
  -2   0  -9    2.72    1.33
   2   0   9    1.21    1.40
   3   0   9    0.52    1.25
   3   0  -9    0.13    1.40
  -3   0  -9   -0.03    1.21
   4   0  -9    1.18    1.35
   5   0  -9    0.16    1.54
   6   0  -9   -0.66    1.71
   7   0  -9   -0.12    1.77
   8   0  -9   -1.86    1.87
   9   0   9   -3.24    2.15
   9   0  -9   -2.30    2.34
  10   0   9    2.13    2.56
  10   0  -9    1.78    2.36
  11   0  -9    0.91    2.58
  11   0   9   -8.14    2.40
  12   0   9   -0.41    2.89
  12   0  -9    3.50    3.46
  13   0   9    1.53    2.94
  13   0  -9    8.21    5.12
  14   0  -9    5.11    3.76
  14   0   9   -0.37    3.22
  15   0   9   -5.78    3.79
  15   0  -9   -2.02    3.21
  16   0   9   -1.95    3.55
  16   0  -9    4.01    4.40
  17   0   9   -3.28    4.31
  17   0  -9    2.04    4.34
   0   0 -10    2.34    1.60
   1   0 -10 1914.51  114.14
  -1   0 -10 1855.91  113.91
   2   0 -10    0.69    1.49
  -2   0 -10    0.01    1.35
  -3   0 -10  557.94   35.58
   3   0 -10  587.69   36.16
   4   0 -10  413.09   26.75
   5   0 -10   42.14    4.80
   6   0 -10  287.58   20.46
   7   0 -10  185.58   13.82
   8   0 -10  265.85   18.75
   9   0 -10   21.90    4.39
   9   0  10   18.86    4.39
  10   0 -10   37.56    6.16
  10   0  10   45.25    5.92
  11   0  10   33.33    5.45
  11   0 -10   26.77    5.03
  12   0  10  397.06   27.10
  12   0 -10  420.04   28.14
  13   0 -10   62.45    8.15
  13   0  10   48.80    6.98
  14   0  10    8.38    4.02
  14   0 -10   10.80    3.96
  15   0  10   76.56    9.13
  15   0 -10   65.64    9.30
  16   0 -10   64.29    9.01
  16   0  10   72.98    8.50
  17   0  10   48.17    7.85
   0   0 -11    0.34    1.43
   1   0 -11    0.44    1.63
  -1   0 -11   -0.95    1.09
  -2   0 -11   -0.42    1.48
   2   0 -11   -1.12    1.31
  -3   0 -11    0.01    1.37
   3   0 -11   -2.32    1.23
   4   0 -11    1.01    1.74
   5   0 -11    1.08    1.77
   6   0 -11   -1.54    1.90
   7   0 -11    2.29    2.28
   8   0 -11    1.32    2.21
   9   0 -11   -2.93    2.15
  10   0  11    2.72    3.18
  10   0 -11    3.49    3.03
  11   0 -11    0.20    2.82
  11   0  11   -6.52    2.57
  12   0  11    0.05    3.29
  13   0  11    0.13    3.25
  13   0 -11   -0.45    3.24
  14   0  11    5.75    4.10
  14   0 -11    9.13    4.51
  15   0  11    6.15    4.26
  15   0 -11   -2.54    3.54
  16   0  11   -2.22    3.83
  16   0 -11    0.99    4.24
  17   0 -11   -0.52    4.39
  17   0  11   -7.49    4.33
   0   0 -12   38.13    4.25
  -1   0 -12   12.63    2.86
   1   0 -12   12.27    2.81
   2   0 -12 1206.36   71.88
  -2   0 -12 1129.28   71.33
   3   0 -12  117.81   10.27
  -3   0 -12  121.20    9.05
   4   0 -12  197.57   14.32
   5   0 -12  182.64   13.55
   6   0 -12    2.89    2.43
   7   0 -12   33.65    5.32
   8   0 -12   29.15    4.87
   9   0 -12  116.08   10.29
  10   0  12  460.89   30.25
  10   0 -12  458.56   30.99
  11   0 -12   62.10    8.29
  11   0  12   73.32    7.78
  12   0  12    0.89    3.08
  12   0 -12    3.26    3.41
  13   0 -12  875.35   57.39
  13   0  12  902.83   56.28
  14   0 -12  208.65   17.32
  15   0 -12    4.22    4.18
  15   0  12   -2.84    3.71
  16   0  12    2.54    4.32
   0   0 -13    2.10    1.91
  -1   0 -13   -0.71    1.70
   2   0 -13   -0.71    1.88
  -2   0 -13   -0.47    1.64
   3   0 -13    1.38    2.11
  -3   0 -13    1.65    1.74
   4   0 -13   -0.14    2.27
   5   0 -13    1.09    2.30
   6   0 -13   -0.06    2.26
   7   0 -13    2.68    2.54
   8   0 -13   -0.14    2.47
   9   0 -13    4.07    2.81
  10   0  13    1.04    3.05
  10   0 -13   -3.56    2.56
  11   0 -13    3.43    3.45
  11   0  13   -0.11    3.20
  12   0 -13    1.26    3.61
  12   0  13    0.14    3.29
  13   0  13   -0.95    3.56
  13   0 -13    0.69    3.52
  14   0 -13   -0.07    4.35
  14   0  13    5.10    4.16
  15   0 -13   -1.21    4.32
  15   0  13    1.53    4.03
  16   0  13   -2.67    4.89
  16   0 -13    2.47    4.74
   0   0 -14 2398.33  145.35
   1   0 -14   88.53    8.10
  -1   0 -14   97.55    8.03
   2   0 -14   23.86    4.20
  -2   0 -14   19.20    3.72
   3   0 -14  467.28   31.09
  -3   0 -14  481.71   30.56
   4   0 -14   39.23    5.79
   5   0 -14    3.05    2.59
   6   0 -14  115.60   10.22
   7   0 -14   60.83    7.09
   8   0 -14  100.94    9.66
   9   0 -14  281.15   20.60
  10   0 -14  183.23   15.22
  11   0  14  372.21   25.83
  11   0 -14  385.64   26.93
  12   0 -14   34.01    6.18
  12   0  14   37.45    6.39
  13   0  14   84.46   10.80
  13   0 -14   78.94   10.20
  14   0  14  138.11   12.31
  14   0 -14  131.31   13.08
  15   0 -14   68.83   12.67
  15   0  14   75.43    9.26
   0   0 -15    3.80    2.49
  -1   0 -15    1.42    2.24
   1   0 -15    0.01    2.12
  -2   0 -15    0.02    2.02
   2   0 -15    2.31    2.31
   3   0 -15    2.39    2.28
  -3   0 -15   -2.26    1.90
   4   0 -15   -1.09    2.26
   5   0 -15    1.05    2.39
   6   0 -15    2.89    2.70
   7   0 -15    5.47    3.28
   8   0 -15    1.09    3.01
   9   0 -15   -0.87    3.00
  10   0 -15   -6.04    2.65
  11   0 -15    0.05    3.27
  11   0  15   -1.97    3.52
  12   0 -15    0.33    3.70
  13   0  15   -6.17    3.74
  13   0 -15   -3.44    3.79
  14   0 -15    5.58    4.97
  14   0  15    0.77    4.50
  15   0 -15    1.97    4.80
  15   0  15    0.63    5.05
   0   0 -16  129.79   10.65
   1   0 -16  560.93   36.11
  -1   0 -16  550.82   35.78
  -2   0 -16  155.07   11.97
   2   0 -16  153.72   12.24
   3   0 -16   -0.92    2.18
  -3   0 -16    3.34    2.44
   4   0 -16  118.35   10.44
   5   0 -16   27.95    5.20
   6   0 -16   11.12    3.69
   7   0 -16   82.46    8.85
   8   0 -16  136.61   12.55
   9   0 -16    5.13    3.63
  10   0 -16   22.11    5.33
  11   0  16    4.90    4.31
  11   0 -16    5.84    3.64
  12   0  16  289.81   20.96
  12   0 -16  281.67   22.10
  13   0  16    4.62    4.54
  13   0 -16    3.75    4.52
  14   0 -16   30.06    7.18
  14   0  16   37.66    7.11
   0   0 -17    1.61    2.03
  -1   0 -17    1.31    2.40
   1   0 -17   -2.26    2.18
  -2   0 -17    0.21    1.98
   2   0 -17    2.36    2.51
  -3   0 -17    2.04    2.38
   3   0 -17   -0.37    2.56
   4   0 -17   -1.76    2.40
   5   0 -17    3.18    2.65
   6   0 -17    0.98    3.29
   7   0 -17   -3.09    2.90
   8   0 -17    2.85    3.69
   9   0 -17   -2.26    2.97
  10   0 -17   -2.35    3.84
  11   0 -17   -5.69    3.31
  11   0  17   -2.61    4.05
  12   0  17   -4.26    4.04
  12   0 -17   -6.66    4.12
  13   0 -17    0.59    4.97
  13   0  17    9.26    4.94
   0   0 -18   69.64    7.54
  -1   0 -18   33.28    5.46
   1   0 -18   33.86    5.27
   2   0 -18    7.00    3.29
  -2   0 -18    4.21    2.98
   3   0 -18    7.33    3.56
  -3   0 -18    9.28    3.53
   4   0 -18    3.18    3.06
   5   0 -18   -2.57    3.78
   6   0 -18   -0.93    3.49
   7   0 -18  249.04   19.15
   8   0 -18   12.26    4.59
   9   0 -18   27.74    6.21
  10   0 -18   40.17    7.67
  11   0 -18   21.57    5.83
  11   0  18   36.35    6.47
  12   0  18   -3.08    4.32
  12   0 -18    2.63    5.22
  13   0 -18   30.76    7.67
  13   0  18   55.10    8.47
   0   0 -19    6.35    2.86
  -1   0 -19   -0.33    2.75
   1   0 -19    3.00    2.89
   2   0 -19   -0.07    2.75
  -2   0 -19    1.50    2.76
   3   0 -19   -1.35    3.26
   4   0 -19    3.01    3.24
   5   0 -19   -2.49    3.13
   6   0 -19    3.54    3.93
   7   0 -19   -2.11    3.78
   8   0 -19   -1.46    3.64
   9   0 -19    3.67    4.06
  10   0 -19   -0.53    4.52
  11   0  19   12.30    5.01
  11   0 -19  -10.57    3.96
  12   0 -19    0.58    4.97
  12   0  19   -0.59    5.07
   0   0 -20  307.56   22.00
  -1   0 -20   22.23    6.14
   1   0 -20   21.88    4.84
  -2   0 -20   66.25   11.59
   2   0 -20   75.63    8.66
   3   0 -20   19.82    4.99
   4   0 -20  191.98   15.80
   5   0 -20   29.17    5.91
   6   0 -20  153.65   13.55
   7   0 -20   67.33    9.67
   8   0 -20   47.36    8.52
   9   0 -20  294.75   23.15
  10   0 -20   -3.41    4.32
  11   0 -20   -2.92    5.30
   0   0 -21   -0.05    3.25
  -1   0 -21   -0.24    3.06
   1   0 -21   -0.08    3.65
  -2   0 -21    0.78    3.58
   2   0 -21    5.03    3.76
   3   0 -21   -0.85    3.59
   4   0 -21    1.86    3.70
   5   0 -21   -0.87    3.61
   6   0 -21   10.97    4.62
   7   0 -21    1.20    4.43
   8   0 -21    5.59    4.81
   9   0 -21   -2.45    4.98
   0   0 -22    8.37    4.27
   1   0 -22  130.53   12.28
  -1   0 -22  139.41   12.24
   2   0 -22   15.49    4.35
  -2   0 -22    6.52    3.98
   3   0 -22  350.73   25.47
   4   0 -22   -3.49    3.61
   5   0 -22   12.76    5.28
   6   0 -22  116.02   12.26
   8   0 -22  164.27   15.58
   0   0 -23    0.64    4.19
  -1   0 -23   -8.18    3.44
   1   0 -23    1.51    4.01
   2   0 -23    3.42    4.47
   3   0 -23   10.58    4.78
   4   0 -23   -2.16    4.23
   6   0 -23   -1.97    4.73
   0   0 -24   82.48   10.52
   1   0 -24  108.10   12.30
  -1   0 -24  112.13   11.75
   3   0 -24   23.94    6.84
  -1  -1   0   45.05    2.59
   1  -1   0   35.96    2.68
  -2  -1   0    0.17    0.56
   2   1   0    0.30    0.48
  -2   1   0    0.85    0.73
   2  -1   0    0.63    0.74
  -3   1   0 3553.34  197.83
  -3  -1   0 3242.09  197.62
   3   1   0 3362.67  197.63
   3  -1   0 3073.72  197.73
  -4   1   0    1.30    0.93
  -4  -1   0    0.50    0.82
   4  -1   0   -0.07    0.92
   4   1   0    0.98    0.82
   5  -1   0   25.59    2.79
  -5  -1   0   24.44    2.60
  -5   1   0   26.91    2.82
   6  -1   0    3.38    1.74
   6   1   0    1.58    1.44
  -6   1   0    2.94    1.89
  -6  -1   0   -2.09    1.44
  -7   1   0   16.58    3.00
  -7  -1   0   17.53    2.87
   7   1   0   20.79    2.96
   7  -1   0   20.93    3.12
   8   1   0    4.04    1.92
   8  -1   0    0.40    1.81
   9  -1   0   -1.30    1.72
   9   1   0    3.03    1.89
  10  -1   0    1.72    2.36
  10   1   0    2.36    2.09
  11  -1   0  272.59   18.64
  12  -1   0    0.51    2.35
  12   1   0   -2.69    1.92
  13  -1   0   87.21    8.59
  13   1   0  103.37    8.60
  14  -1   0    3.47    2.99
  14   1   0   -2.02    2.41
  15   1   0  227.82   17.34
  15  -1   0  251.53   17.73
  16  -1   0    1.76    3.69
  17  -1   0   50.18    7.65
  17   1   0   53.66    7.39
  18   1   0   -0.32    3.68
  18  -1   0   -0.79    3.91
  19   1   0   -2.49    4.21
  19  -1   0   -0.60    4.81
   0  -1  -1    0.06    0.08
   1  -1  -1   28.03    1.90
  -1   1   1   25.12    1.87
   2   1   1    1.36    0.67
  -2  -1   1    1.33    0.63
   2  -1  -1    1.45    0.73
   2   1  -1    0.49    0.58
   2  -1   1    1.46    0.92
  -2   1   1    1.19    0.73
  -2  -1  -1    0.76    0.66
  -3  -1   1  541.15   32.21
   3   1   1  522.63   32.13
   3  -1  -1  562.63   32.35
  -3   1  -1  492.28   32.30
   3   1  -1  542.83   32.22
  -3  -1  -1  563.94   32.19
   3  -1   1  490.98   32.28
  -4   1  -1  347.15   22.32
   4  -1  -1  335.94   22.28
  -4  -1   1  364.95   22.21
   4   1   1  376.03   22.17
   4  -1   1  367.97   22.35
   4   1  -1  391.03   22.27
  -4   1   1  357.40   22.33
  -4  -1  -1  341.80   22.16
   5  -1  -1   52.92    4.28
   5   1   1   47.04    4.09
  -5  -1   1   57.40    4.26
  -5   1  -1   55.05    4.41
  -5   1   1   51.53    4.35
   5  -1   1   53.03    4.36
   5   1  -1   56.75    4.19
  -5  -1  -1   45.88    4.07
  -6   1  -1   13.55    2.69
  -6  -1   1   17.40    3.01
   6  -1  -1   17.48    2.77
   6   1   1   18.62    2.68
  -6   1   1   17.56    2.81
   6  -1   1   18.26    2.82
   6   1  -1   16.21    2.59
  -6  -1  -1   15.80    2.58
  -7   1  -1    0.78    1.87
  -7  -1   1    1.45    1.81
   7  -1  -1    3.36    1.82
   7   1   1    1.36    1.65
   7  -1   1    1.16    1.66
   7   1  -1    0.89    1.53
  -7  -1  -1    2.47    1.81
   8   1   1  318.08   21.02
   8  -1  -1  330.10   21.32
   8   1  -1  338.44   21.19
   8  -1   1  329.76   21.30
   9  -1  -1    2.45    1.86
   9   1   1    1.30    1.55
   9   1  -1    3.23    1.76
   9  -1   1   -0.23    1.87
  10   1   1  245.72   16.61
  10  -1  -1  242.78   16.76
  10  -1   1  254.87   16.86
  10   1  -1  242.63   16.64
  11   1   1  203.10   13.95
  11  -1  -1  187.51   13.99
  11   1  -1  189.55   14.11
  11  -1   1  203.06   14.19
  12   1   1    2.25    2.58
  12  -1  -1    1.58    2.49
  12   1  -1    0.07    2.29
  12  -1   1   -1.55    2.40
  13   1   1   44.25    5.81
  13  -1  -1   43.34    5.88
  13   1  -1   45.68    5.95
  13  -1   1   41.97    5.80
  14  -1  -1  153.85   12.01
  14   1   1  133.73   11.49
  14  -1   1  152.56   12.01
  14   1  -1  153.66   11.90
  15   1   1   82.90    8.29
  15  -1  -1   98.11    8.91
  15   1  -1   75.64    8.30
  15  -1   1   80.81    8.52
  16  -1  -1  210.94   15.77
  16   1   1  193.91   16.18
  16   1  -1  194.35   17.93
  16  -1   1  202.52   15.52
  17   1   1   27.10    5.75
  17  -1  -1   22.48    5.68
  17  -1   1   27.29    5.64
  17   1  -1   22.42    5.15
  18  -1  -1    4.73    4.47
  18   1   1   15.81    5.15
  18   1  -1    8.21    4.94
  18  -1   1   13.50    5.09
  19  -1  -1   -4.45    4.53
  19   1   1   -0.46    4.33
  19  -1   1   -6.32    4.09
  19   1  -1   -2.44    4.02
   0  -1   2   -0.07    0.29
   0  -1  -2   -0.23    0.22
   0   1   2    0.45    0.30
   0   1  -2   -0.45    0.27
  -1  -1   2  927.26   49.03
   1   1   2  858.57   48.83
   1  -1  -2  773.07   48.95
   1  -1   2  740.88   48.94
  -1   1   2  777.79   48.93
  -1  -1  -2  813.10   48.80
   2  -1  -2    8.22    1.24
  -2  -1   2   11.15    1.26
  -2   1   2    7.55    1.27
   2   1  -2    8.63    1.27
   3   1   2  381.19   24.58
  -3  -1   2  421.64   24.76
   3  -1  -2  399.28   24.80
  -3   1   2  400.78   24.79
   3   1  -2  418.67   24.80
  -4  -1   2  342.89   20.51
   4   1   2  306.95   20.32
   4  -1  -2  350.78   21.36
  -4   1   2  318.36   20.53
   4   1  -2  339.38   20.54
   4  -1   2  327.15   20.56
   5   1   2  266.53   16.59
  -5  -1   2  263.92   16.67
   5  -1  -2  261.22   16.79
  -5  -1  -2  258.08   16.64
   5   1  -2  273.90   16.76
   5  -1   2  253.01   16.73
  -6  -1   2   12.52    2.35
   6  -1  -2   11.94    2.44
   6   1   2   15.82    2.69
  -6   1   2   16.99    2.72
  -6  -1  -2   11.78    2.51
   6  -1   2   14.52    2.78
   6   1  -2   12.58    2.33
   7   1   2   92.29    7.07
  -7  -1   2   94.07    7.15
   7  -1  -2   91.41    7.22
   7   1  -2   95.67    7.13
  -7  -1  -2   91.80    7.12
   7  -1   2   92.15    7.27
   8   1   2  221.00   14.43
   8  -1  -2  213.88   14.63
   8  -1   2  220.84   14.63
   8   1  -2  209.24   14.47
   9  -1  -2    1.06    1.77
   9   1   2   -1.06    1.60
   9   1  -2    1.44    1.69
   9  -1   2    2.54    1.80
  10  -1  -2  120.99   11.75
  10   1   2  140.44   10.36
  10  -1   2  150.22   10.65
  10   1  -2  148.09   10.61
  11   1   2   -0.09    2.12
  11  -1  -2    4.78    2.64
  11   1  -2    0.27    2.12
  11  -1   2    0.01    2.54
  12  -1  -2    6.34    2.84
  12   1   2   14.50    3.44
  12   1  -2    8.30    3.06
  12  -1   2    5.57    3.14
  13   1   2    2.00    2.30
  13  -1  -2   -1.28    2.80
  13   1  -2    5.25    2.89
  13  -1   2   -2.17    2.81
  14   1   2   33.23    5.43
  14  -1  -2   40.22    5.95
  14   1  -2   53.01    6.83
  14  -1   2   39.16    6.14
  15   1   2   58.58    6.67
  15  -1  -2   54.74    7.32
  15  -1   2   43.13    6.38
  15   1  -2   42.59    6.07
  16  -1  -2  181.87   14.00
  16   1   2  171.45   13.38
  16  -1   2  161.87   13.60
  16   1  -2  151.51   13.41
  17   1   2    2.94    4.12
  17  -1  -2    3.17    3.98
  17   1  -2    3.22    3.15
  17  -1   2   12.17    3.85
  18   1   2   12.40    4.35
  18  -1  -2   11.32    4.71
  18   1  -2   12.46    4.59
  18  -1   2    4.13    4.45
  19   1   2    7.39    4.51
  19   1  -2    2.50    4.29
  19  -1   2   -7.27    4.81
   0  -1  -3   -0.32    0.46
   0   1  -3   -0.15    0.52
   0  -1   3    1.19    0.65
   0   1   3   -0.33    0.45
   1  -1  -3  548.72   34.88
   1   1   3  609.79   34.78
  -1   1  -3  565.50   34.88
  -1  -1   3  586.02   34.94
  -1  -1  -3  602.66   34.76
   1  -1   3  525.97   34.86
  -1   1   3  596.70   34.88
   2  -1  -3  244.71   15.79
  -2  -1   3  266.00   15.79
   2   1   3  251.03   15.55
  -2   1   3  244.45   15.73
   2   1  -3  262.02   15.84
  -3  -1   3   66.56    4.75
   3  -1  -3   67.95    4.85
   3   1  -3   66.38    4.80
  -4  -1   3   63.17    4.74
   4   1   3   66.63    4.72
   4  -1  -3   66.53    4.91
   4   1  -3   62.14    4.85
   5  -1  -3   65.39    5.42
   5  -1   3   71.95    5.61
   5   1  -3   79.88    5.59
  -5   1   3   65.35    5.37
   6   1   3   63.71    5.03
  -6  -1   3   63.26    5.09
   6  -1  -3   57.12    5.12
  -6   1   3   54.22    5.00
   6  -1   3   52.06    5.27
   6   1  -3   60.68    5.13
   7  -1  -3  249.26   16.53
   7   1   3  256.28   16.28
   7   1  -3  254.23   16.49
   7  -1   3  239.16   16.43
   8  -1  -3   21.49    3.53
   8   1   3   26.43    3.61
   8   1  -3   28.44    3.74
   8  -1   3   27.27    3.68
   9  -1  -3   26.76    3.95
   9   1   3   23.49    3.71
   9   1  -3   23.06    3.82
   9  -1   3   34.47    4.35
  10  -1  -3   39.39    5.45
  10   1   3   44.74    5.06
  10  -1   3   50.92    5.58
  10   1  -3   54.17    5.32
  11   1   3  104.40    8.84
  11  -1  -3  114.14    9.25
  11  -1   3  101.52    8.98
  11   1  -3  118.78    9.23
  12   1   3   12.45    3.43
  12  -1  -3   16.00    3.96
  12   1  -3   13.43    3.39
  12  -1   3   19.41    4.03
  13  -1  -3   -0.69    2.52
  13   1   3    3.68    2.80
  13   1  -3    1.36    2.52
  13  -1   3    1.85    2.71
  14   1   3   40.37    5.97
  14  -1  -3   44.43    6.08
  14  -1   3   54.94    6.57
  14   1  -3   53.75    6.90
  15  -1  -3  240.22   21.02
  15   1   3  238.38   16.74
  15   1  -3  222.94   16.88
  15  -1   3  217.56   16.82
  16   1   3    6.03    3.74
  16  -1  -3    3.50    3.88
  16   1  -3    5.98    3.55
  16  -1   3    1.93    3.66
  17   1   3   56.10    7.14
  17  -1  -3   40.86    6.95
  17  -1   3   49.90    7.29
  17   1  -3   66.75    7.64
  18   1   3   -5.59    3.50
  18  -1  -3    3.34    4.06
  18  -1   3    0.79    4.07
  18   1  -3    5.24    3.68
  19  -1  -3    2.66    5.56
  19   1   3   -3.46    4.40
  19  -1   3    1.32    4.37
  19   1  -3   -3.09    4.14
   0   1  -4   -0.18    0.65
   0   1   4    0.85    0.62
   0  -1  -4    0.02    0.64
   0  -1   4    0.45    0.66
   1   1   4  206.48   12.47
  -1   1  -4  195.76   12.54
  -1  -1   4  206.52   12.64
   1  -1  -4  185.39   12.52
   1   1  -4  199.33   12.64
   1  -1   4  195.81   12.58
  -1   1   4  204.52   12.55
  -1  -1  -4  201.69   12.44
   2  -1  -4  650.93   40.39
  -2  -1   4  706.35   40.42
   2   1   4  641.85   40.15
   2   1  -4  698.69   40.48
  -2   1   4  648.37   40.32
   2  -1   4  641.80   40.31
   3  -1  -4  510.44   31.96
  -3  -1   4  527.60   31.58
   3   1  -4  507.69   31.96
  -3   1   4  511.48   31.53
  -4  -1   4  112.66    7.72
   4  -1  -4  114.31    7.87
   4   1  -4  114.76    7.83
  -4   1   4  106.09    7.97
   5  -1  -4  346.80   21.83
  -5  -1   4  344.69   21.63
   5   1   4  350.76   21.55
   5   1  -4  352.00   21.81
   5  -1   4  326.62   21.70
  -5   1   4  339.39   21.69
  -6  -1   4   17.13    2.67
   6   1   4   17.81    2.92
   6  -1  -4   18.77    2.89
   6  -1   4   17.62    3.05
   6   1  -4   20.86    3.04
   7  -1  -4  200.66   13.68
   7   1   4  186.35   13.30
   7   1  -4  204.15   13.68
   7  -1   4  213.77   13.72
   8  -1  -4   70.04    6.34
   8   1   4   73.01    6.04
   8   1  -4   77.26    6.31
   8  -1   4   72.01    6.26
   9  -1  -4   15.46    3.24
   9   1   4   16.45    3.18
   9   1  -4   14.51    2.97
   9  -1   4   21.21    3.61
  10  -1  -4  151.26   11.09
  10   1   4  145.29   10.61
  10   1  -4  129.36   12.13
  10  -1   4  142.46   10.86
  11  -1  -4   59.25    6.51
  11   1   4   56.31    6.08
  11   1  -4   61.71    6.21
  11  -1   4   62.67    6.48
  12  -1  -4    3.11    2.50
  12   1   4    5.94    2.88
  12  -1   4    4.23    3.02
  12   1  -4    0.64    2.18
  13   1   4   -3.51    2.61
  13  -1  -4    3.91    2.81
  13  -1   4    1.97    2.72
  13   1  -4    3.58    2.53
  14  -1  -4  185.14   14.21
  14   1   4  173.98   13.52
  14  -1   4  185.14   13.90
  14   1  -4  179.99   14.00
  15   1   4   49.39    6.94
  15  -1  -4   44.83    7.47
  15  -1   4   66.30    7.45
  15   1  -4   68.57    7.41
  16   1   4    8.73    3.90
  16  -1  -4    8.02    3.74
  16   1  -4    9.66    4.08
  16  -1   4    2.11    3.79
  17  -1  -4    2.04    3.82
  17   1   4    4.20    3.87
  17  -1   4    8.14    4.29
  17   1  -4   15.64    4.73
  18  -1  -4    1.85    4.04
  18   1   4    1.40    3.83
  18   1  -4   -7.81    3.61
  18  -1   4   14.78    4.80
  19  -1  -4   -2.84    4.48
  19   1   4   -1.42    4.71
  19  -1   4    3.40    4.84
   0   1   5    1.16    0.67
   0  -1  -5    0.40    0.60
   0   1  -5    0.98    0.65
   0  -1   5    0.72    0.63
   1  -1  -5  412.02   25.38
  -1  -1   5  399.52   25.39
   1   1   5  416.19   25.26
  -1   1  -5  420.91   25.36
   1  -1   5  393.92   25.35
  -1  -1  -5  411.84   25.23
  -1   1   5  427.26   25.36
   2   1   5  120.10    7.50
  -2  -1   5  105.68    7.58
   2   1  -5  102.33    7.63
  -2  -1  -5  124.92    7.46
  -2   1   5  124.21    7.68
   2  -1   5   97.95    7.51
   3   1   5  120.86    7.91
  -3  -1   5  115.66    8.10
   3   1  -5  119.96    8.26
   3  -1   5  121.48    8.11
  -4  -1   5   86.96    6.46
   4  -1  -5   96.83    6.74
  -4   1   5   91.46    6.55
   4   1  -5   81.79    6.57
  -5  -1   5    3.58    1.49
   5  -1  -5    3.92    1.66
   5   1  -5    4.21    1.79
  -5   1   5    4.84    1.63
   6  -1  -5  175.52   12.30
   6   1   5  172.53   11.93
   6   1  -5  175.46   12.26
   6  -1   5  187.89   12.32
   7   1   5    0.73    1.68
   7  -1  -5    1.84    1.74
   7  -1   5    3.05    1.96
   7   1  -5    2.60    1.37
   8  -1  -5  100.53    8.17
   8   1   5   97.32    7.75
   8  -1   5   97.82    7.94
   8   1  -5  113.50    8.26
   9   1   5   57.16    5.55
   9  -1  -5   60.83    6.67
   9  -1   5   59.31    5.97
   9   1  -5   63.03    5.92
  10   1   5   24.11    4.16
  10  -1  -5   28.30    4.56
  10  -1   5   30.61    4.73
  10   1  -5   28.06    4.41
  11   1   5    3.93    2.85
  11  -1  -5    4.07    2.76
  11   1  -5    2.79    2.49
  11  -1   5    0.36    2.56
  12  -1  -5    4.68    3.08
  12   1   5    1.40    2.96
  12  -1   5    2.67    2.94
  12   1  -5    2.86    2.80
  13   1   5    3.85    2.77
  13  -1  -5   -0.93    2.59
  13   1  -5   -0.75    2.47
  13  -1   5    4.97    3.18
  14   1   5   30.29    5.16
  14  -1  -5   27.79    5.31
  14   1  -5   29.14    5.15
  14  -1   5   34.41    5.67
  15  -1  -5   -2.87    2.80
  15   1   5   -3.00    2.97
  15   1  -5   -1.96    4.67
  15  -1   5   -4.74    3.10
  16  -1  -5    2.16    3.23
  16   1   5    7.38    3.78
  16  -1   5   12.98    4.93
  16   1  -5    2.85    3.64
  17   1   5    4.75    3.66
  17  -1  -5    9.43    4.20
  17   1  -5   -2.56    3.58
  17  -1   5    5.48    4.25
  18  -1  -5    3.77    4.08
  18   1   5    2.52    3.85
  18   1  -5   -5.96    3.63
  18  -1   5   -6.21    4.09
   0  -1  -6    1.75    0.93
   0   1   6    1.37    0.83
   0  -1   6    0.49    0.69
   0   1  -6   -0.76    0.68
  -1  -1   6  159.36   10.63
  -1   1  -6  165.51   10.58
   1  -1  -6  153.49   10.56
   1   1   6  157.79   10.48
   1  -1   6  166.04   10.65
  -1   1   6  158.61   10.53
   1   1  -6  155.48   10.65
  -1  -1  -6  171.80   10.51
   2  -1  -6  519.88   32.89
  -2  -1   6  574.40   33.83
  -2   1  -6  536.36   32.79
   2   1   6  502.14   32.65
   2   1  -6  525.36   32.96
   2  -1   6  525.72   32.85
  -2   1   6  542.64   32.85
  -2  -1  -6  549.54   32.66
   3  -1  -6  100.05    6.95
   3   1   6   90.86    6.53
  -3  -1   6   90.60    6.73
  -3   1   6   94.12    6.78
   3  -1   6   92.42    6.70
   3   1  -6   94.62    6.91
   4  -1  -6   51.04    4.60
   4   1   6   52.09    4.02
  -4  -1   6   41.07    4.15
   4   1  -6   46.32    4.42
   4  -1   6   44.46    4.17
  -4   1   6   54.73    4.41
   5  -1  -6  516.53   33.22
   5   1  -6  545.77   33.29
   6  -1  -6  238.15   16.07
   6   1  -6  241.40   16.10
   7  -1  -6   97.44    7.84
   7   1   6   97.73    7.60
   7   1  -6  100.77    7.90
   7  -1   6  103.60    7.92
   8  -1  -6  331.70   22.25
   8   1   6  336.38   21.76
   8  -1   6  338.73   22.00
   8   1  -6  341.99   22.25
   9   1   6    6.42    2.63
   9  -1  -6    8.91    2.63
   9  -1   6   13.63    3.39
  10   1   6   78.39    6.93
  10  -1  -6   71.35    7.21
  10   1  -6   83.83    7.36
  11  -1  -6    2.26    2.07
  11   1  -6    0.26    2.46
  11  -1   6    2.17    3.03
  12  -1  -6    4.77    3.01
  12   1   6    4.74    2.92
  12  -1   6   -1.32    2.83
  12   1  -6    7.29    2.85
  13  -1  -6   24.43    4.61
  13   1   6   26.72    4.74
  13  -1   6   35.75    5.63
  13   1  -6   35.31    5.62
  14  -1  -6    3.77    3.07
  14   1   6   -3.25    2.95
  14   1  -6    2.99    2.76
  14  -1   6   -3.19    2.92
  15   1   6   -1.52    2.92
  15  -1  -6   -1.38    3.13
  15  -1   6   -0.84    3.46
  15   1  -6    2.25    3.18
  16  -1  -6   24.16    5.27
  16   1   6   27.70    5.89
  16   1  -6   16.86    4.57
  16  -1   6   25.29    5.24
  17  -1  -6   13.78    4.96
  17   1   6   17.48    4.39
  17   1  -6   20.42    4.91
  17  -1   6   16.99    4.78
  18   1   6   -2.54    3.40
  18  -1  -6    4.74    4.67
  18  -1   6    2.45    4.37
  18   1  -6    1.89    4.50
   0  -1   7    0.02    1.03
   0   1   7   -0.02    0.88
   0  -1  -7    0.12    1.05
   0   1  -7   -0.90    0.94
  -1  -1   7  536.98   33.93
   1   1   7  575.04   33.85
   1  -1  -7  542.67   33.92
  -1   1  -7  551.76   33.90
  -1  -1  -7  564.46   33.81
   1   1  -7  534.21   33.98
   1  -1   7  540.58   34.33
   2  -1  -7  448.43   26.37
  -2  -1   7  385.14   26.15
   2   1   7  434.45   26.09
  -2   1  -7  410.59   26.08
   2  -1   7  393.78   26.11
   2   1  -7  402.65   26.28
  -2   1   7  428.99   26.18
  -2  -1  -7  447.25   26.00
  -3  -1   7    9.43    1.92
   3   1   7    4.92    1.57
   3  -1  -7    6.75    1.97
   3  -1   7    1.53    1.30
  -3   1   7    5.01    1.63
   3   1  -7    3.05    1.55
   4  -1  -7   -0.19    1.33
   4  -1   7   -0.01    1.18
   4   1  -7    0.32    1.42
   5  -1  -7  343.69   20.16
   5   1   7  288.88   19.36
   5   1  -7  297.11   19.92
   5  -1   7  294.94   19.61
   6  -1  -7   56.81    5.34
   6   1   7   53.37    4.71
   6   1  -7   58.71    5.36
   7  -1  -7  251.75   17.25
   7   1   7  257.83   16.80
   7   1  -7  252.42   17.21
   8   1   7    3.03    2.01
   8  -1  -7    2.23    2.13
   8  -1   7   -1.33    1.80
   8   1  -7   -0.11    1.77
   9  -1  -7   26.74    4.17
   9   1   7   31.32    4.35
   9   1  -7   32.19    4.61
   9  -1   7   28.75    4.47
  10  -1  -7   20.61    4.24
  10   1   7   21.90    3.73
  10  -1   7   20.35    3.91
  10   1  -7   22.31    4.01
  11  -1  -7   33.78    5.31
  11   1   7   37.19    5.37
  11   1  -7   36.43    5.26
  11  -1   7   40.16    5.75
  12   1   7    0.32    2.73
  12  -1  -7   -0.27    2.34
  12   1  -7    0.35    2.28
  12  -1   7   -1.43    2.89
  13   1   7   -2.44    2.81
  13  -1  -7    1.05    2.55
  13  -1   7    1.50    3.23
  13   1  -7   -0.44    2.69
  14   1   7   22.17    4.43
  14  -1  -7   18.40    5.55
  14   1  -7   25.77    5.34
  14  -1   7   36.15    5.62
  15  -1  -7   -8.61    2.84
  15   1   7   -0.71    3.26
  15   1  -7    0.55    3.07
  15  -1   7   -5.54    3.23
  16  -1  -7   15.29    4.71
  16   1  -7   19.66    4.83
  16  -1   7    8.49    4.35
  17   1   7   -3.41    3.53
  17  -1  -7   -4.30    3.98
  17  -1   7    1.96    4.16
  17   1  -7   -2.44    3.94
  18   1   7    1.07    4.36
  18  -1   7    0.20    4.45
  18   1  -7   -0.07    4.93
   0  -1   8    1.83    1.30
   0  -1  -8    0.66    1.36
   0   1   8   -0.11    1.17
   0   1  -8    0.48    1.23
  -1   1  -8  143.88    9.57
   1   1   8  134.02    9.43
  -1  -1   8  135.46    9.53
   1  -1  -8  131.85    9.54
  -1   1   8  138.67    9.48
   1   1  -8  141.73    9.70
  -1  -1  -8  129.60    9.35
   1  -1   8  139.00    9.60
   2  -1  -8   36.97    3.59
  -2   1  -8   29.77    3.35
   2   1   8   30.32    3.27
  -2  -1   8   27.69    3.30
  -2   1   8   34.88    3.37
  -2  -1  -8   31.09    3.24
   2   1  -8   33.26    3.61
   2  -1   8   31.13    3.42
   3  -1  -8   20.88    3.07
   3   1   8   22.18    2.74
   3   1  -8   21.57    3.19
   3  -1   8   27.32    3.39
   4  -1  -8  123.45    9.16
   4   1   8  124.40    8.77
   4  -1   8  122.57    9.10
   4   1  -8  124.96    9.20
   5   1   8    2.17    1.34
   5  -1  -8    3.08    1.66
   5   1  -8    1.47    1.63
   6  -1  -8   20.14    3.43
   6   1   8   15.87    2.78
   6   1  -8   13.15    3.05
   7  -1  -8   12.18    3.01
   7   1  -8   11.21    2.75
   8   1   8  248.30   16.90
   8  -1  -8  253.92   17.54
   8   1  -8  263.49   17.62
   8  -1   8  245.06   17.21
   9  -1  -8   10.74    3.13
   9   1   8    8.92    3.14
   9   1  -8   11.67    3.18
   9  -1   8    9.69    3.28
  10   1   8  203.57   14.77
  10  -1  -8  201.10   15.38
  10  -1   8  223.55   15.23
  10   1  -8  211.85   15.42
  11   1   8   71.87    7.19
  11  -1  -8   67.06    7.36
  11  -1   8   79.60    7.62
  11   1  -8   76.13    7.75
  12   1   8    0.62    2.59
  12  -1  -8    1.71    2.65
  12  -1   8   -1.89    3.02
  12   1  -8   -0.42    2.52
  13   1   8   24.32    4.74
  13  -1  -8   16.49    4.50
  13  -1   8   19.61    4.79
  13   1  -8   10.92    3.91
  14  -1  -8   57.93    7.58
  14   1   8   39.61    5.97
  14   1  -8   56.34    7.66
  14  -1   8   38.78    6.36
  15  -1  -8   15.07    4.14
  15   1   8    9.80    4.07
  15   1  -8   11.25    4.35
  16  -1  -8   74.22    8.44
  16   1   8   42.61    6.62
  16   1  -8   43.32    6.99
  16  -1   8   37.48    6.44
  17  -1  -8    5.48    4.45
  17   1   8   -1.37    3.94
  17  -1   8   -5.71    3.83
  17   1  -8   -2.08    3.86
  18  -1  -8    5.09    5.07
  18   1   8    2.96    4.41
  18   1  -8    7.78    6.68
  18  -1   8    5.33    4.77
   0  -1  -9   -1.45    1.01
   0   1   9    0.64    1.27
   0   1  -9    1.24    1.46
   1  -1  -9    3.44    1.72
  -1   1  -9    4.13    1.43
   1   1   9    1.46    1.44
  -1   1   9    3.54    1.37
  -1  -1  -9    2.38    1.33
   1   1  -9    1.92    1.54
  -2   1  -9   42.63    4.11
   2   1   9   52.96    4.38
   2  -1  -9   40.96    4.36
  -2  -1  -9   47.00    4.14
   2   1  -9   41.38    4.42
   3   1   9   34.73    3.71
   3  -1  -9   40.46    4.05
   3   1  -9   37.32    4.15
  -3  -1  -9   35.21    3.55
   4  -1  -9   34.46    4.13
   4   1   9   35.38    3.60
   4   1  -9   37.31    4.10
   5  -1  -9    6.91    2.24
   5   1  -9    0.90    1.68
   6  -1  -9   61.38    6.18
   6   1  -9   69.70    6.23
   7  -1  -9   29.60    4.55
   7   1  -9   28.04    4.55
   8   1   9  233.76   15.50
   8  -1  -9  224.85   15.93
   8   1  -9  207.79   15.80
   9   1   9   57.79    5.81
   9  -1  -9   51.23    6.31
   9  -1   9   62.75    6.35
   9   1  -9   50.68    6.72
  10   1   9   22.39    4.95
  10  -1  -9   23.24    4.23
  10  -1   9   22.56    4.44
  10   1  -9   18.75    4.20
  11   1   9   -0.02    2.28
  11  -1  -9    1.31    2.89
  11   1  -9    3.22    2.70
  11  -1   9    2.71    3.00
  12  -1  -9   24.45    4.74
  12   1   9   32.51    5.33
  12   1  -9   22.10    4.67
  12  -1   9   26.04    4.72
  13   1   9   34.31    5.46
  13   1  -9   23.91    4.94
  13  -1   9   28.24    5.27
  14   1   9   31.91    5.52
  14  -1  -9   27.08    5.70
  14   1  -9   39.95    6.12
  14  -1   9   28.97    5.54
  15   1   9   42.87    6.02
  15  -1  -9   32.87    6.53
  15  -1   9   43.36    6.62
  15   1  -9   35.58    6.27
  16  -1  -9    0.63    4.26
  16   1   9    1.26    3.63
  16   1  -9    3.33    3.79
  16  -1   9    7.71    4.25
  17  -1  -9   23.60    6.13
  17   1   9   26.28    5.28
  17  -1   9   21.86    5.81
  17   1  -9   25.66    6.24
   0  -1 -10   -1.81    1.04
   0   1 -10   -0.59    1.32
  -1   1 -10  147.34   10.37
   1  -1 -10  156.00   10.54
   1   1 -10  138.16   10.44
  -1  -1 -10  144.26   10.29
  -2   1 -10   15.71    2.66
   2  -1 -10   16.56    2.85
  -2  -1 -10   22.44    2.99
   2   1 -10   19.24    3.18
   3  -1 -10  275.68   18.18
  -3   1 -10  277.97   17.80
   3   1 -10  262.82   18.15
  -3  -1 -10  269.96   17.65
   4  -1 -10   67.63    6.07
   4   1 -10   61.38    5.97
   5  -1 -10   -1.13    1.43
   5   1 -10    1.08    1.40
   6  -1 -10   96.12   10.41
   6   1 -10   85.36    8.36
   7  -1 -10  101.04    8.69
   7   1 -10   99.46    8.70
   8  -1 -10    3.59    2.50
   8   1 -10    5.68    2.91
   9   1  10   10.35    3.19
   9  -1 -10    5.20    2.98
   9   1 -10    9.42    3.46
   9  -1  10    8.61    3.43
  10   1  10  104.78    8.94
  10  -1 -10  103.22    9.58
  10   1 -10  115.13    9.79
  10  -1  10  105.90    9.41
  11   1  10   -3.10    2.51
  11  -1 -10   -2.96    2.39
  11  -1  10    1.82    2.86
  11   1 -10    0.72    2.74
  12   1  10   17.89    4.45
  12  -1 -10   22.86    4.53
  12  -1  10   20.60    4.78
  12   1 -10   16.35    4.48
  13   1  10   21.00    4.70
  13  -1 -10   18.07    4.99
  13   1 -10   12.21    3.66
  13  -1  10   22.46    4.64
  14   1  10  181.79   13.96
  14  -1 -10  185.19   15.01
  14   1 -10  177.09   14.89
  14  -1  10  176.80   14.23
  15  -1 -10   -4.03    3.63
  15   1  10    0.27    3.67
  15   1 -10   -1.93    3.39
  15  -1  10    3.84    4.11
  16  -1 -10  100.61   11.60
  16   1  10  103.61   10.60
  16   1 -10  127.35   11.80
  16  -1  10  116.97   11.12
  17   1  10   20.88    5.56
  17  -1 -10   19.88    7.38
  17  -1  10   33.11    6.32
   0   1 -11    1.02    1.48
   0  -1 -11   -1.90    1.06
  -1   1 -11  183.59   13.27
   1  -1 -11  203.75   13.57
  -1  -1 -11  206.92   13.40
   1   1 -11  183.01   13.43
   2  -1 -11  230.77   16.03
  -2   1 -11  228.07   15.69
  -2  -1 -11  246.58   15.73
   2   1 -11  233.08   16.09
  -3   1 -11   38.59    4.20
   3  -1 -11   43.65    4.67
  -3  -1 -11   40.85    4.03
   3   1 -11   31.69    4.60
   4  -1 -11   54.35    5.59
   4   1 -11   55.52    5.59
   5  -1 -11   24.10    4.56
   5   1 -11   18.41    3.71
   6  -1 -11    1.15    2.24
   6   1 -11    4.81    2.34
   7  -1 -11   40.04    5.46
   7   1 -11   35.34    5.23
   8  -1 -11    6.52    3.03
   8   1 -11   12.62    3.49
   9  -1 -11   38.44    5.58
   9   1  11   36.91    5.49
   9   1 -11   39.32    5.74
  10  -1 -11   17.09    4.00
  10   1  11   19.41    4.12
  10   1 -11    8.42    3.43
  10  -1  11   21.47    4.29
  11  -1 -11    3.03    2.92
  11   1  11    1.49    3.15
  11  -1  11   -1.93    2.89
  11   1 -11    4.61    2.92
  12  -1 -11    9.95    5.15
  12   1  11   12.10    3.90
  12  -1  11    9.45    3.81
  13  -1 -11   21.86    5.02
  13   1  11   20.79    4.74
  13   1 -11   25.90    5.35
  13  -1  11   24.16    4.91
  14   1  11  131.34   11.35
  14   1 -11  130.64   12.35
  15  -1 -11   80.42    9.87
  15   1  11   64.59   10.91
  15  -1  11   75.41    9.34
  15   1 -11   92.81    9.76
  16   1  11   44.86    6.56
  16  -1 -11   45.49    7.68
  16  -1  11   29.04    6.53
  16   1 -11   40.68    7.08
  17  -1 -11    2.93    5.01
  17   1  11   -6.25    4.76
  17   1 -11   11.73    5.61
  17  -1  11   11.65    5.75
   0  -1 -12    2.09    1.88
   0   1 -12    1.58    1.35
   1  -1 -12   11.74    2.90
  -1   1 -12   10.87    2.54
  -1  -1 -12   12.88    2.63
   1   1 -12   12.89    2.94
   2  -1 -12   50.94    5.40
  -2   1 -12   54.46    5.08
   2   1 -12   48.97    5.30
  -2  -1 -12   47.45    4.85
  -3   1 -12   78.27    6.54
   3  -1 -12   68.77    6.73
  -3  -1 -12   75.67    6.36
   4  -1 -12   16.74    3.57
   4   1 -12   21.87    3.92
   5  -1 -12  134.16   10.77
   5   1 -12  134.94   10.82
   6  -1 -12    8.66    2.96
   6   1 -12   10.26    2.91
   7  -1 -12    6.11    3.04
   7   1 -12    4.41    2.42
   8  -1 -12   -3.92    2.32
   8   1 -12   -2.52    2.19
   9  -1 -12   74.69    8.13
   9   1 -12   80.25    8.15
  10   1  12   65.14    6.95
  10  -1 -12   59.26    7.13
  10  -1  12   49.16    7.05
  10   1 -12   52.13    7.23
  11   1  12   -2.14    3.09
  11  -1 -12    6.24    3.58
  11  -1  12    1.57    3.24
  11   1 -12    4.04    3.14
  12  -1 -12   11.92    4.43
  12   1  12   10.94    3.91
  12  -1  12   21.33    4.90
  12   1 -12   21.38    4.71
  13  -1 -12   25.05    5.69
  13   1  12   15.95    4.26
  13   1 -12   21.25    5.17
  13  -1  12   21.57    5.26
  14  -1 -12    9.10    4.46
  14   1  12    7.46    4.05
  14  -1  12    7.85    4.34
  14   1 -12    9.40    4.44
  15  -1 -12   14.56    5.55
  15   1  12   22.72    5.53
  15   1 -12   30.05    6.80
  15  -1  12   25.83    5.20
  16  -1 -12   28.13    8.27
  16   1  12   30.52    6.12
  16   1 -12   39.81   11.66
  16  -1  12   32.22    6.34
   0  -1 -13    0.72    1.75
  -1   1 -13   13.49    3.88
   1  -1 -13   17.63    3.49
  -1  -1 -13   11.47    2.96
   1   1 -13    5.69    2.62
   2  -1 -13   32.81    6.42
  -2   1 -13   31.99    5.12
  -2  -1 -13   34.40    4.62
   2   1 -13   36.88    5.27
   3  -1 -13  388.97   25.80
  -3  -1 -13  390.36   25.19
   3   1 -13  387.48   25.81
   4  -1 -13   18.25    3.95
   4   1 -13    9.56    3.09
   5  -1 -13   61.64    6.34
   5   1 -13   51.88    6.28
   6  -1 -13   24.73    4.41
   6   1 -13   25.80    4.75
   7  -1 -13    6.58    2.91
   7   1 -13   -0.62    2.17
   8  -1 -13   13.09    3.83
   8   1 -13   11.02    3.21
   9  -1 -13   17.75    4.67
   9   1 -13    8.72    3.29
  10   1  13  107.48    9.75
  10  -1 -13  104.89   10.05
  10  -1  13   99.61    9.79
  10   1 -13  105.14    9.96
  11   1  13  146.62   11.75
  11  -1 -13  153.57   12.79
  11  -1  13  133.72   11.67
  11   1 -13  129.05   12.31
  12  -1 -13   -0.35    3.70
  12   1  13    0.86    3.44
  12  -1  13    0.49    3.69
  12   1 -13   -3.26    2.75
  13  -1 -13   -5.57    3.43
  13   1  13    1.09    3.39
  13   1 -13    1.95    3.37
  14  -1 -13   70.80    9.47
  14   1 -13   66.01    9.07
  14  -1  13   74.02    8.42
  15  -1 -13    8.56    4.64
  15   1  13    6.59    4.43
  15   1 -13    1.80    4.33
  15  -1  13    4.91    4.51
  16  -1 -13  112.31   12.49
  16   1  13  102.53   10.87
  16   1 -13   96.29   11.61
  16  -1  13  105.90   11.33
   0  -1 -14    0.08    1.85
   0   1 -14    2.32    2.18
  -1   1 -14    2.32    2.17
   1  -1 -14    2.47    2.39
  -1  -1 -14    3.25    2.55
   1   1 -14    3.02    2.39
   2  -1 -14   55.92    6.58
  -2   1 -14   60.50    6.10
   2   1 -14   78.98    6.91
  -3   1 -14   47.34    5.30
   3  -1 -14   49.39    6.15
   3   1 -14   44.34    5.94
  -3  -1 -14   40.03    7.38
   4  -1 -14    6.41    2.96
   4   1 -14    5.81    2.79
   5  -1 -14    5.62    3.00
   5   1 -14    8.03    3.07
   6  -1 -14    2.04    2.49
   6   1 -14    1.06    2.30
   7  -1 -14    0.42    2.63
   7   1 -14    0.28    2.67
   8  -1 -14   18.07    4.37
   8   1 -14   14.57    3.84
   9  -1 -14   20.66    4.70
   9   1 -14   14.32    4.34
  10  -1 -14    6.38    3.96
  10   1  14    2.18    3.26
  10   1 -14    1.00    2.62
  11  -1 -14  120.29   11.57
  11   1  14  123.93   10.81
  11   1 -14  130.85   11.98
  11  -1  14  128.12   11.23
  12   1  14    5.45    3.63
  12  -1 -14   -3.52    3.26
  12  -1  14    5.17    3.93
  12   1 -14    4.17    3.48
  13  -1 -14   11.08    4.33
  13   1  14    6.40    3.78
  13  -1  14    6.05    4.28
  13   1 -14    2.43    3.80
  14   1  14   32.73    6.02
  14  -1 -14   33.58    6.75
  14   1 -14   32.22    6.94
  14  -1  14   49.03    7.27
  15  -1 -14   37.78    8.49
  15   1  14   58.36    7.89
  15  -1  14   54.32    8.41
   0  -1 -15    2.22    2.35
   0   1 -15    0.58    2.16
  -1   1 -15  124.10   10.61
   1  -1 -15  143.25   11.11
   1   1 -15  138.77   11.08
  -1  -1 -15  145.68   10.86
   2  -1 -15   61.45    6.53
  -2   1 -15   58.55    6.12
   2   1 -15   58.43    6.42
  -2  -1 -15   56.76    5.98
  -3   1 -15    0.61    2.18
   3  -1 -15    4.87    2.85
  -3  -1 -15    4.61    2.56
   3   1 -15   -0.51    2.48
   4  -1 -15   23.74    4.90
   4   1 -15   24.02    4.83
   5  -1 -15   10.55    3.52
   5   1 -15    8.80    3.29
   6  -1 -15    7.89    3.52
   6   1 -15    1.60    2.38
   7  -1 -15    5.25    3.38
   7   1 -15    5.55    3.22
   8  -1 -15   39.56    6.44
   8   1 -15   41.94    6.89
   9  -1 -15   12.87    4.64
   9   1 -15   12.25    3.95
  10  -1 -15   50.28    7.71
  10   1 -15   49.85    7.63
  11   1  15   37.38    6.05
  11  -1 -15   31.02    5.87
  11   1 -15   24.11    5.61
  11  -1  15   37.80    6.49
  12   1  15   -1.08    3.27
  12  -1 -15    1.50    3.71
  12  -1  15    3.80    3.86
  12   1 -15    1.83    4.16
  13   1  15    6.55    4.53
  13  -1 -15    8.09    4.59
  13   1 -15   -1.27    3.79
  13  -1  15   -0.55    3.92
  14   1  15    9.13    4.51
  14  -1 -15    9.63    8.53
  14   1 -15    3.99    5.12
  14  -1  15    2.62    4.18
  15   1  15   -4.43    4.74
  15  -1 -15    5.17    5.45
  15   1 -15    6.16    5.09
  15  -1  15    3.25    5.26
   0  -1 -16    1.13    2.50
   0   1 -16    2.05    2.49
  -1   1 -16    9.13    3.31
   1  -1 -16   11.94    3.31
   1   1 -16   14.65    3.78
  -1  -1 -16   17.69    3.90
  -2   1 -16   98.83    8.92
   2  -1 -16  102.34    9.29
   2   1 -16  106.82    9.29
  -2  -1 -16  103.20    8.81
  -3   1 -16   22.07    4.38
   3  -1 -16   19.71    4.55
  -3  -1 -16   32.51    4.79
   3   1 -16   27.23    4.97
   4  -1 -16    4.43    3.30
   4   1 -16    5.22    3.10
   5  -1 -16    1.08    2.70
   5   1 -16    3.01    3.06
   6  -1 -16    7.14    3.05
   6   1 -16    7.38    3.37
   7  -1 -16    1.73    3.17
   7   1 -16    3.33    3.22
   8  -1 -16   43.72    7.60
   8   1 -16   64.77    7.62
   9  -1 -16   19.26    4.48
   9   1 -16   16.45    4.50
  10  -1 -16   27.34    5.68
  10   1 -16   16.88    4.98
  11   1  16   12.49    4.63
  11  -1 -16   23.14    5.47
  11   1 -16   13.02    5.18
  11  -1  16   21.22    4.79
  12  -1 -16   17.80    5.53
  12   1  16   16.16    5.99
  12  -1  16    9.13    4.66
  12   1 -16   10.28    4.77
  13   1  16    8.06    4.25
  13  -1 -16   12.80    5.47
  13  -1  16   12.57    4.25
  13   1 -16   -0.43    4.05
  14  -1 -16    3.58    4.99
  14   1  16    3.78    5.03
  14   1 -16   -2.81    4.58
  14  -1  16    3.34    4.92
   0   1 -17    3.51    2.46
   0  -1 -17    7.05    2.83
  -1   1 -17   14.30    3.45
   1  -1 -17   16.81    4.04
  -1  -1 -17   12.25    3.60
   1   1 -17    7.59    3.33
   2  -1 -17   75.47    7.46
  -2   1 -17   58.03    6.75
   2   1 -17   65.00    7.28
  -2  -1 -17   68.76    6.96
   3  -1 -17    0.58    2.39
  -3   1 -17    4.82    2.64
   3   1 -17    2.60    2.74
  -3  -1 -17    2.24    2.69
   4  -1 -17   16.58    4.59
   4   1 -17   18.84    4.26
   5  -1 -17   -1.83    2.95
   5   1 -17    1.95    3.24
   6  -1 -17   57.51    8.07
   6   1 -17   45.23   10.69
   7  -1 -17   13.10    4.29
   7   1 -17    6.12    4.08
   8  -1 -17   10.79    4.24
   8   1 -17    9.30    3.88
   9  -1 -17    1.11    3.64
   9   1 -17    2.36    3.34
  10  -1 -17    6.54    4.25
  10   1 -17    8.42    4.47
  11   1  17    0.91    5.66
  11  -1 -17    4.76    4.51
  11   1 -17    1.81    4.16
  11  -1  17    7.60    4.46
  12  -1 -17    0.42    3.92
  12   1  17    8.46    4.45
  12  -1  17   -7.92    4.11
  12   1 -17    6.03    4.58
  13  -1 -17   16.42    5.72
  13   1  17   26.56    5.71
  13  -1  17   16.57    5.86
  13   1 -17   17.74    5.88
   0  -1 -18    4.62    2.55
   0   1 -18    1.45    2.93
  -1   1 -18    5.55    2.97
   1  -1 -18    8.22    2.97
  -1  -1 -18    5.44    3.10
   1   1 -18    8.33    2.99
  -2   1 -18  103.61    9.18
   2  -1 -18   99.97    9.33
   2   1 -18   89.29    9.33
  -2  -1 -18  108.16    9.22
   3  -1 -18    6.59    3.18
   3   1 -18    7.44    3.60
  -3  -1 -18   12.47    3.48
   4  -1 -18    8.23    4.43
   4   1 -18   10.51    3.81
   5   1 -18    4.46    3.63
   6  -1 -18   44.93    7.15
   6   1 -18   60.51    7.97
   7  -1 -18   21.05    5.52
   7   1 -18   21.47    5.66
   8  -1 -18    9.45    4.10
   8   1 -18   -3.35    3.19
   9  -1 -18   33.82    6.78
   9   1 -18   40.16    6.90
  10  -1 -18    1.38    3.82
  10   1 -18    1.68    4.47
  11   1  18   12.33    4.51
  11  -1 -18    9.14    5.12
  11   1 -18   -3.83    4.22
  11  -1  18   -3.35    4.20
  12   1  18    3.42    4.27
  12  -1 -18    2.37    5.10
  12   1 -18   -6.57    4.29
  12  -1  18   17.92    5.29
  13  -1 -18    7.49    5.70
  13   1  18    5.28    5.15
  13   1 -18   17.94    6.30
  13  -1  18    7.84    5.36
   0  -1 -19   -0.15    2.93
   0   1 -19    2.45    2.78
   1  -1 -19    4.90    3.02
  -1   1 -19    6.58    3.01
   1   1 -19    3.27    3.27
  -1  -1 -19    5.59    3.29
  -2   1 -19    5.22    2.82
   2  -1 -19    5.23    3.49
  -2  -1 -19    1.58    2.75
   3   1 -19   13.01    4.59
  -3  -1 -19    9.13    3.49
   4  -1 -19    7.39    3.59
   4   1 -19    0.96    2.87
   5  -1 -19   13.80    4.57
   5   1 -19   16.03    4.52
   6   1 -19   31.62    6.24
   7  -1 -19    7.20    4.49
   7   1 -19    6.02    3.93
   8  -1 -19   24.89    5.94
   8   1 -19   18.95    5.39
   9  -1 -19    8.91    4.76
   9   1 -19    6.68    4.42
  10  -1 -19   -0.77    4.32
  10   1 -19    2.82    4.86
  11   1  19   -1.18    4.47
  11  -1 -19   -2.95    5.35
  11   1 -19    4.44    4.80
  12  -1 -19   25.99    7.46
  12   1  19   23.98    6.61
  12  -1  19   32.24    7.59
  12   1 -19   22.97    6.73
   0   1 -20   -1.48    3.23
   1  -1 -20   16.01    4.41
  -1   1 -20   10.15    3.73
   1   1 -20   17.22    4.62
  -1  -1 -20   16.91    5.62
  -2   1 -20   28.44    5.63
   2  -1 -20   28.40    5.59
   2   1 -20   25.93    5.68
  -2  -1 -20   24.40    5.84
   3  -1 -20    0.09    3.37
   3   1 -20   -3.31    3.27
   4  -1 -20    4.89    3.88
   4   1 -20    1.96    3.27
   5  -1 -20   16.98    5.10
   5   1 -20   18.87    5.27
   6  -1 -20   49.52    8.07
   6   1 -20   60.31    8.46
   7  -1 -20   21.41    5.86
   7   1 -20   22.65    5.82
   8  -1 -20   88.25   10.41
   8   1 -20   87.44   11.53
   9  -1 -20    3.13    4.52
   9   1 -20   -2.19    4.73
  10  -1 -20    1.01    5.30
  10   1 -20   12.67    5.69
  11   1  20   -3.79    5.41
  11  -1 -20    8.71    5.93
  11   1 -20    6.17    5.85
   0  -1 -21   -1.43    3.51
   0   1 -21   -0.63    3.07
   1  -1 -21   52.02    7.32
  -1   1 -21   42.37    6.84
   1   1 -21   48.37    7.17
  -1  -1 -21   56.35    7.58
  -2   1 -21  106.19    9.78
   2  -1 -21  100.08    9.81
   2   1 -21   95.19    9.88
  -2  -1 -21   86.35    9.49
   3  -1 -21    6.52    3.99
   3   1 -21    3.51    3.35
   4  -1 -21   39.70    6.85
   4   1 -21   33.10    6.92
   5  -1 -21   13.25    4.55
   5   1 -21   18.77    5.06
   6  -1 -21    5.14    4.09
   6   1 -21    3.29    3.84
   7  -1 -21   43.39    8.10
   7   1 -21   40.06    7.67
   8  -1 -21    3.05    5.51
   8   1 -21    5.49    5.77
   9  -1 -21   -5.32    4.75
   9   1 -21   -2.41    5.22
   0   1 -22    6.79    4.15
   0  -1 -22    4.03    4.01
  -1   1 -22   36.39    6.33
   1  -1 -22   49.66    7.32
   1   1 -22   45.06    7.43
  -1  -1 -22   36.81    6.12
   2  -1 -22   -0.77    3.98
  -2   1 -22   -2.02    3.15
   2   1 -22    2.57    3.92
  -2  -1 -22    0.73    3.46
   3  -1 -22   19.80    5.90
   3   1 -22   29.55    5.87
   4  -1 -22   19.38    5.07
   4   1 -22   10.34    4.66
   5  -1 -22    2.12    4.13
   5   1 -22   15.35    4.96
   6  -1 -22   39.02    7.61
   6   1 -22   35.24    7.24
   7   1 -22    7.07    5.35
   8  -1 -22   22.98    6.61
   8   1 -22   22.75    6.41
   0   1 -23   -4.58    3.47
   0  -1 -23    2.09    4.31
   1  -1 -23   12.76    4.86
  -1   1 -23   13.71    5.10
   1   1 -23    7.48    4.44
  -1  -1 -23   15.16    5.08
   2  -1 -23   76.24    9.61
   2   1 -23   69.75    8.99
  -2  -1 -23   47.40    7.54
   3  -1 -23    6.44    4.68
   3   1 -23    1.76    4.19
   4  -1 -23   59.58    9.29
   4   1 -23   62.37    9.39
   5   1 -23   -3.14    4.80
   6  -1 -23   34.48    6.86
   6   1 -23   38.30    7.39
   0  -1 -24    1.72    4.55
   0   1 -24    5.19    5.37
  -1   1 -24    4.76    4.61
   1  -1 -24    0.49    4.54
  -1  -1 -24   -0.16    4.43
   1   1 -24   -0.81    6.82
   2  -1 -24   41.66    9.02
   2   1 -24   39.09    7.83
   3  -1 -24    7.12    8.83
   3   1 -24   15.83    6.03
  -1   2   0    0.77    0.53
  -1  -2   0    0.43    0.24
   1  -2   0    0.68    0.51
   1   2   0    0.10    0.18
   2  -2   0   39.41    3.45
  -2  -2   0   46.13    3.13
  -2   2   0   46.63    3.55
   2   2   0   53.42    3.17
  -3   2   0    0.85    1.06
  -3  -2   0    0.40    0.67
   3  -2   0   -0.13    0.93
   3   2   0   -0.09    0.56
   4   2   0   45.43    3.26
  -4  -2   0   41.52    3.26
  -4   2   0   38.89    3.56
  -5  -2   0   -0.19    1.01
   5   2   0    0.96    0.88
  -5   2   0    2.05    1.35
   5  -2   0    1.31    1.43
   6  -2   0  124.65    8.75
   6   2   0  120.95    8.32
  -6   2   0  125.94    8.75
  -6  -2   0  110.15    8.29
   7   2   0    1.58    1.30
   7  -2   0    1.12    1.88
  -7  -2   0   -1.25    1.58
   8  -2   0   69.44    6.07
  -8  -2   0   66.18    5.80
   8   2   0   74.82    5.83
   9  -2   0   -0.78    1.92
   9   2   0   -0.83    1.45
  10  -2   0   -1.97    2.48
  10   2   0   -0.24    1.70
  11  -2   0   -3.08    2.19
  11   2   0    2.20    2.23
  12   2   0   34.50    4.95
  12  -2   0   33.71    5.11
  13  -2   0   -1.37    2.51
  13   2   0    1.11    2.36
  14   2   0   20.60    4.20
  14  -2   0   18.61    4.37
  15  -2   0   -2.17    3.13
  15   2   0    1.45    2.97
  16  -2   0    5.39    3.89
  16   2   0   -0.29    3.03
  17   2   0    1.59    3.59
  17  -2   0   -2.36    3.75
  18  -2   0   -2.22    4.02
  18   2   0    5.93    4.04
  19   2   0    2.78    4.39
  19  -2   0   -5.41    6.57
   0  -2   1  642.64   40.77
   0   2  -1  674.26   40.78
   0  -2  -1  685.04   40.65
   0   2   1  715.32   40.71
   1  -2  -1 6310.75  386.17
  -1   2   1 6561.23  386.34
   2   2   1 9999.00  600.13
  -3  -2   1 1027.07   63.03
   3  -2  -1 1080.89   63.28
   3   2   1 1070.31   62.92
  -3  -2  -1 1077.69   62.95
   3  -2   1 1023.62   63.26
   3   2  -1  992.38   63.05
  -3   2   1 1071.52   63.27
   4  -2  -1  334.17   19.54
  -4   2  -1  293.27   19.14
   4   2   1  308.34   18.77
  -4  -2   1  301.97   18.88
  -4   2   1  306.72   19.12
  -4  -2  -1  309.06   18.81
   4   2  -1  286.69   18.87
   5  -2  -1   61.52    5.04
  -5   2  -1   64.40    5.40
  -5  -2   1   63.09    4.71
   5   2   1   58.95    4.61
   5  -2   1   65.23    5.11
  -5  -2  -1   66.77    4.73
  -6  -2   1  136.59    9.98
   6   2   1  161.72    9.63
   6  -2  -1  151.54    9.96
  -6   2  -1  122.31    9.88
  -6   2   1  154.57   10.09
   6   2  -1  122.01    9.51
  -6  -2  -1  157.67    9.75
   6  -2   1  126.33    9.87
   7  -2  -1  101.46    7.44
   7   2   1   90.49    6.96
  -7  -2   1   96.09    7.09
   7   2  -1  100.49    7.12
  -7  -2  -1   81.44    6.95
   7  -2   1   98.95    7.38
   8  -2  -1  313.40   19.41
   8   2   1  306.57   18.95
   8   2  -1  275.23   18.94
   8  -2   1  278.27   19.23
  -8  -2  -1  298.59   19.05
   9  -2  -1  166.20   11.81
   9   2   1  167.60   11.40
   9  -2   1  164.97   11.79
   9   2  -1  157.05   11.45
  10   2   1 1014.45   64.34
  10  -2   1 1082.55   64.85
  10   2  -1 1058.79   64.56
  11   2   1   22.89    3.84
  11  -2  -1   23.03    4.43
  11  -2   1   20.67    4.09
  11   2  -1   25.62    4.59
  12   2   1  260.15   18.49
  12  -2  -1  271.25   19.00
  12  -2   1  285.74   18.99
  12   2  -1  274.35   18.66
  13   2   1   10.98    3.39
  13  -2  -1   12.51    3.67
  13  -2   1   10.94    3.58
  13   2  -1    8.69    3.20
  14  -2  -1    5.32    3.10
  14   2   1   -0.52    2.32
  14   2  -1    4.91    2.96
  14  -2   1    5.62    3.33
  15  -2  -1   40.73    6.62
  15   2   1   46.93    6.16
  15  -2   1   27.32    5.59
  15   2  -1   45.00    5.96
  16  -2  -1   -1.32    3.50
  16   2   1    5.60    3.60
  16  -2   1   -1.40    3.28
  16   2  -1    2.36    3.62
  17   2   1   25.61    5.30
  17  -2  -1   25.37    5.57
  17   2  -1   26.28    5.51
  17  -2   1   23.36    5.52
  18   2   1    0.58    3.69
  18  -2  -1    9.62    4.82
  18  -2   1   -0.67    4.53
  18   2  -1   10.23    4.00
  19   2   1    4.88    4.58
  19   2  -1    5.52    4.67
  19  -2   1    7.15    5.23
   0  -2  -2  155.95    9.65
   0   2   2  158.97    9.64
   1   2   2   28.48    1.83
  -1  -2   2   30.51    2.19
  -1  -2  -2   23.79    1.80
   1   2  -2   27.65    2.16
  -2  -2   2  110.21    6.26
   2  -2  -2   78.50    6.19
   2   2  -2  113.03    6.30
  -2   2   2   77.98    6.16
   3   2   2    5.16    1.00
  -3  -2   2    5.80    1.04
   3  -2  -2    4.09    1.11
   3   2  -2    6.35    1.18
  -3   2   2    6.11    1.27
   4   2   2   16.27    1.79
  -4  -2   2   17.91    1.89
   4  -2  -2   17.12    2.22
  -4   2   2   14.68    2.14
   4   2  -2   21.31    2.06
   4  -2   2   14.27    2.23
   5  -2  -2   25.50    2.97
  -5  -2   2   28.98    2.72
   5   2   2   23.84    2.64
   5   2  -2   24.76    2.74
  -5  -2  -2   21.25    2.72
  -5   2   2   24.70    2.98
   5  -2   2   25.91    3.24
   6  -2  -2  163.98   10.86
   6   2   2  159.77   10.40
  -6  -2   2  158.87   10.53
  -6  -2  -2  145.13   10.44
   6  -2   2  148.93   10.76
  -6   2   2  144.91   10.69
   6   2  -2  163.83   10.59
   7  -2  -2    6.30    2.07
  -7  -2   2    1.71    1.78
   7   2   2    4.78    1.78
   7  -2   2    5.55    2.19
   7   2  -2    6.37    1.96
  -7  -2  -2    6.22    2.28
   8  -2  -2   72.67    6.30
   8   2   2   67.54    5.69
  -8  -2  -2   59.66    5.76
   8  -2   2   80.89    6.48
   8   2  -2   77.22    6.01
   9  -2  -2    1.98    1.73
   9   2   2    1.28    1.72
   9  -2   2    0.06    2.05
   9   2  -2   -0.84    1.53
  10   2   2    0.94    1.99
  10  -2  -2   -0.55    2.06
  10   2  -2   -1.56    1.74
  10  -2   2   -1.68    2.17
  11   2   2    2.67    2.39
  11  -2  -2    3.64    2.43
  11   2  -2    1.45    2.17
  11  -2   2    5.10    2.87
  12  -2  -2   15.06    3.69
  12   2   2   16.31    3.45
  12  -2   2   23.95    4.39
  12   2  -2   15.88    3.65
  13  -2  -2   -0.55    2.19
  13   2   2   -1.94    2.49
  13   2  -2   -1.51    2.17
  13  -2   2    5.86    2.77
  14   2   2   21.70    4.18
  14  -2  -2   14.91    4.40
  14   2  -2   19.96    4.21
  14  -2   2   25.95    4.83
  15   2   2    2.42    2.71
  15  -2   2   -5.58    2.85
  15   2  -2    4.53    3.33
  16   2   2   -5.96    2.66
  16  -2  -2    5.55    3.45
  16  -2   2   -3.53    2.90
  16   2  -2    3.22    5.16
  17  -2  -2    6.02    3.63
  17   2   2    0.79    3.40
  17   2  -2    2.42    3.26
  17  -2   2    2.71    3.89
  18  -2  -2    9.02    4.65
  18   2   2    4.22    3.77
  18  -2   2   -0.33    4.16
  18   2  -2    8.67    4.48
  19   2   2   -0.30    4.22
  19  -2  -2    1.61    6.71
  19  -2   2    0.55    4.69
  19   2  -2    1.10    4.17
   1  -2  -3   72.05    5.11
  -1   2  -3   83.98    5.26
   1   2   3   70.14    4.89
  -1  -2   3   84.46    5.28
  -1   2   3   76.29    5.10
   1  -2   3   80.62    5.23
   1   2  -3   82.13    5.27
  -1  -2  -3   68.58    4.88
   2  -2  -3   25.01    2.41
  -2  -2   3   34.30    2.52
   2   2   3   23.28    2.04
  -2   2   3   29.80    2.45
   2   2  -3   33.07    2.57
   3  -2  -3    0.48    0.70
  -3  -2   3    0.32    0.63
  -3   2   3    1.07    0.82
   3   2  -3    0.25    0.69
   4   2   3 3815.68  215.66
  -4  -2   3 3497.91  215.86
   4  -2  -3 3695.54  216.05
  -4   2   3 3507.58  215.95
   4   2  -3 3519.52  215.97
  -5  -2   3   94.91    6.94
   5  -2  -3   94.51    6.92
   5   2   3   89.71    6.50
   5   2  -3   90.64    6.72
  -5   2   3   94.59    6.88
   5  -2   3   93.30    7.04
   6   2   3  643.40   36.86
  -6  -2   3  564.85   36.95
   6  -2  -3  634.23   37.31
   6   2  -3  543.83   37.02
  -6   2   3  628.10   37.29
   6  -2   3  591.10   37.21
   7  -2  -3   42.69    4.65
  -7  -2   3   61.74    5.61
   7   2   3   45.70    4.30
   7  -2   3   48.20    4.95
   7   2  -3   48.52    4.50
   8   2   3  406.56   25.78
   8  -2  -3  392.44   26.21
   8   2  -3  421.03   26.18
   8  -2   3  420.75   26.25
   9   2   3  118.39    8.93
   9  -2  -3  124.72    9.49
   9  -2   3  134.84    9.60
   9   2  -3  114.31    9.11
  10   2   3   47.66    4.95
  10  -2  -3   51.52    5.47
  10   2  -3   43.33    5.25
  10  -2   3   55.49    6.16
  11   2   3   49.67    5.30
  11  -2  -3   49.79    5.69
  11  -2   3   52.11    6.42
  11   2  -3   53.29    6.44
  12   2   3  230.24   15.42
  12  -2  -3  224.01   16.01
  12  -2   3  215.15   15.83
  12   2  -3  209.92   15.63
  13   2   3    5.80    2.82
  13  -2  -3   10.80    3.20
  13   2  -3   14.37    3.57
  13  -2   3    6.03    3.37
  14   2   3   28.79    4.91
  14  -2  -3   41.54    6.18
  14   2  -3   36.54    5.59
  14  -2   3   30.17    5.40
  15  -2  -3   17.21    5.05
  15   2   3   24.59    4.81
  15  -2   3   26.54    5.10
  15   2  -3   21.44    4.50
  16  -2  -3    3.54    3.78
  16   2   3    9.64    3.74
  16  -2   3   -2.67    3.30
  16   2  -3    3.50    3.27
  17  -2  -3   20.14    5.07
  17   2   3    5.33    3.89
  17   2  -3   17.87    4.69
  17  -2   3   18.73    5.10
  18   2   3    2.16    3.89
  18  -2  -3   -1.20    4.10
  18  -2   3    0.83    4.31
  18   2  -3    5.07    4.19
  19   2   3   38.34    6.58
  19  -2  -3   36.21    7.08
  19   2  -3   26.40    6.38
  19  -2   3   37.65    7.76
   0   2   4  487.94   30.16
   0  -2  -4  481.94   30.18
   0   2  -4  526.63   30.43
   0  -2   4  493.52   30.40
   1  -2  -4   44.29    3.56
  -1  -2   4   47.07    3.66
  -1   2  -4   46.07    3.60
   1   2   4   51.46    3.43
   1  -2   4   45.73    3.64
  -1  -2  -4   51.16    3.42
  -1   2   4   44.88    3.50
   1   2  -4   56.32    3.80
   2  -2  -4   36.82    3.10
   2   2   4   39.37    2.84
  -2  -2   4   44.93    3.23
   2   2  -4   41.49    3.22
  -2   2   4   38.05    3.08
   2  -2   4   32.82    3.05
  -3  -2   4    0.48    0.76
   3   2   4   -0.10    0.47
   3  -2  -4    0.21    0.85
  -3   2   4    0.06    0.77
   3   2  -4   -0.85    0.65
  -4  -2   4   25.28    2.55
   4  -2  -4   23.28    2.71
   4   2  -4   28.16    2.87
  -5  -2   4   12.32    2.10
   5   2   4   11.41    2.11
   5  -2  -4   10.19    2.33
   5   2  -4   11.80    2.15
  -5   2   4    8.78    2.12
   6   2   4  142.24   10.05
   6  -2  -4  145.14   10.43
  -6  -2   4  149.06   10.21
   6  -2   4  150.26   10.56
   6   2  -4  156.98   10.48
   7   2   4   24.83    3.14
   7  -2  -4   24.84    3.50
   7  -2   4   25.93    3.81
   7   2  -4   23.52    3.31
   8   2   4   33.44    3.80
   8  -2  -4   37.11    4.25
   8  -2   4   40.10    4.47
   8   2  -4   37.23    4.13
   9   2   4    2.30    1.82
   9  -2  -4    3.69    2.01
   9  -2   4   -2.38    1.93
   9   2  -4    0.37    1.74
  10   2   4    1.26    2.14
  10  -2  -4    3.05    2.37
  11   2   4    5.58    2.50
  11  -2  -4    5.88    2.78
  11  -2   4    6.14    3.41
  11   2  -4    2.29    2.40
  12  -2  -4   17.48    4.16
  12   2   4   24.18    4.03
  12  -2   4   17.09    4.11
  12   2  -4   16.21    3.69
  13  -2  -4    8.34    3.29
  13   2   4    7.80    3.01
  13   2  -4   14.08    3.55
  13  -2   4    4.43    3.04
  14  -2  -4    7.43    3.17
  14   2   4    4.33    3.10
  14   2  -4    6.02    3.02
  14  -2   4    4.44    3.40
  15  -2  -4    1.78    3.30
  15   2   4    3.85    2.94
  15   2  -4   -2.18    2.48
  15  -2   4   -2.28    3.25
  16  -2  -4    0.60    3.42
  16   2   4   -0.64    3.06
  16   2  -4    0.40    3.08
  16  -2   4   -0.48    3.87
  17   2   4    2.20    3.53
  17  -2  -4    1.85    3.69
  17  -2   4   -1.14    3.62
  17   2  -4   -4.17    3.48
  18   2   4  -10.63    3.47
  18  -2  -4    3.12    4.17
  18   2  -4   -4.00    3.72
  18  -2   4   -4.65    4.02
  19   2  -4   -8.64    4.24
   0  -2   5  284.95   16.76
   0   2   5  252.22   16.42
   0  -2  -5  258.08   16.47
   1  -2  -5  214.90   13.46
   1   2   5  219.27   13.31
  -1  -2   5  190.25   13.48
  -1  -2  -5  217.35   13.29
  -1   2   5  213.15   13.41
   1   2  -5  221.51   13.98
   1  -2   5  208.66   13.57
   2   2   5  179.74   10.56
  -2  -2   5  148.50   10.75
   2  -2   5  160.74   10.82
   2   2  -5  151.74   10.84
  -2  -2  -5  173.32   10.50
  -2   2   5  176.96   10.79
  -3  -2   5    5.90    1.39
   3   2   5    4.82    1.09
   3  -2  -5    6.50    1.54
   3  -2   5    5.81    1.44
  -3   2   5    7.04    1.48
   3   2  -5    4.15    1.42
   4   2   5  214.31   13.59
  -4  -2   5  207.78   13.93
   4  -2  -5  219.79   14.14
  -4   2   5  219.61   13.97
   4   2  -5  210.88   14.07
  -5  -2   5    7.58    1.93
   5  -2  -5    3.51    1.76
   5   2  -5    9.72    2.15
  -5   2   5    1.27    1.57
   6  -2  -5 1545.42   92.04
   6   2   5 1563.47   91.46
   6  -2   5 1504.49   91.93
   6   2  -5 1450.37   91.89
   7  -2  -5   15.93    2.98
   7   2   5   23.03    3.11
   7  -2   5   22.61    3.68
   7   2  -5   19.94    3.26
   8   2   5  259.91   16.17
   8  -2  -5  250.80   16.69
   8   2  -5  236.35   16.55
   8  -2   5  232.17   16.52
   9   2   5   38.64    4.45
   9  -2  -5   36.39    7.44
   9   2  -5   36.45    4.43
   9  -2   5   41.72    5.36
  10   2   5   56.74    5.78
  10  -2  -5   63.22    6.41
  10   2  -5   64.68    6.23
  10  -2   5   62.03    6.42
  11  -2  -5  299.07   21.39
  11   2   5  308.51   20.72
  11  -2   5  336.55   21.44
  11   2  -5  309.50   21.25
  12  -2  -5  161.54   12.91
  12   2   5  170.04   12.26
  12  -2   5  165.27   12.77
  12   2  -5  164.39   12.81
  13   2   5   29.01    4.77
  13  -2  -5   27.48    5.17
  13  -2   5   29.20    5.42
  13   2  -5   24.04    4.67
  14  -2  -5    6.07    3.72
  14   2   5    1.81    2.66
  14   2  -5   -1.02    2.57
  14  -2   5    3.01    3.71
  15   2   5    8.85    3.63
  15  -2  -5   17.20    4.40
  15  -2   5   13.24    4.41
  16  -2  -5    8.50    3.80
  16   2   5    5.16    3.64
  16   2  -5    8.16    3.81
  16  -2   5    7.66    4.35
  17   2   5   -4.38    3.08
  17  -2  -5   -5.11    3.58
  17   2  -5    0.04    3.19
  17  -2   5    4.00    4.11
  18   2   5    5.32    4.64
  18  -2  -5   15.90    5.44
  18   2  -5   15.51    5.10
  18  -2   5    4.99    4.92
   0   2   6   98.31    6.92
   0   2  -6  107.13    7.24
   0  -2   6  105.41    7.23
   0  -2  -6   99.16    6.99
   1   2   6   93.53    6.46
  -1   2  -6  102.15    6.78
   1  -2  -6   91.78    6.98
  -1  -2   6   91.82    6.73
  -1  -2  -6   94.78    6.46
  -1   2   6   95.95    6.58
   1  -2   6   92.54    6.69
   2  -2  -6   87.91    6.85
   2   2   6   97.73    6.58
  -2   2  -6  106.11    6.90
  -2  -2   6   81.94    7.01
   2  -2   6  106.32    8.42
  -2   2   6   94.89    6.72
  -2  -2  -6   99.13    6.51
   3  -2  -6   -1.58    1.14
   3   2   6   -1.10    0.76
  -3  -2   6   -0.48    0.93
   3   2  -6    1.01    1.19
  -3   2   6    1.74    1.26
   3  -2   6    1.41    1.16
   4   2   6   46.95    3.98
  -4  -2   6   52.34    4.44
   4  -2  -6   54.01    4.71
  -4   2   6   46.61    4.28
   4   2  -6   56.89    4.68
   4  -2   6   45.71    4.35
   5  -2  -6   32.69    3.73
   5   2   6   33.23    3.14
   5   2  -6   36.49    3.95
   6   2   6   52.22    4.91
   6  -2  -6   57.25    5.21
   6   2  -6   56.31    5.11
   7   2   6   28.06    3.48
   7  -2  -6   30.41    4.12
   7   2  -6   25.19    3.70
   7  -2   6   32.34    4.28
   8  -2  -6   23.32    3.90
   8   2   6   32.52    3.66
   8  -2   6   27.90    4.03
   8   2  -6   23.25    3.72
   9  -2  -6    0.25    1.94
   9   2   6    0.39    1.82
   9  -2   6   -0.15    2.16
  10  -2  -6    6.04    2.80
  10   2   6    3.49    2.64
  10   2  -6    5.15    2.46
  10  -2   6    3.53    2.92
  11  -2  -6    8.06    3.03
  11   2   6    5.04    2.64
  11   2  -6    3.18    2.54
  11  -2   6    2.84    3.08
  12  -2  -6    1.44    2.46
  12   2   6    3.21    2.77
  12  -2   6    2.99    3.20
  12   2  -6    3.06    2.61
  13  -2  -6    2.38    2.99
  13   2   6   -0.09    2.60
  13   2  -6    1.27    2.51
  13  -2   6    3.82    3.63
  14   2   6    6.47    3.28
  14  -2   6    4.39    3.48
  14   2  -6    6.97    3.44
  15   2   6    1.84    2.84
  15  -2  -6    1.37    3.21
  15   2  -6    5.29    3.76
  16   2   6    4.95    3.71
  16  -2  -6    1.01    3.65
  16   2  -6    6.61    3.44
  16  -2   6    5.91    4.23
  17   2   6    0.84    3.48
  17  -2  -6   -1.37    3.70
  17  -2   6    2.28    4.25
  17   2  -6    1.23    4.03
  18  -2  -6   -2.64    7.80
  18   2   6   -3.65    3.64
  18  -2   6   -2.30    4.31
  18   2  -6   -9.57    3.81
   0   2   7  647.64   37.68
   0   2  -7  591.95   37.83
   0  -2   7  567.95   37.82
   0  -2  -7  649.52   37.75
   1  -2  -7 1091.09   65.18
  -1   2  -7 1060.54   65.18
  -1  -2   7 1028.71   65.24
   1   2   7 1081.97   65.02
  -1   2   7 1087.80   65.11
  -1  -2  -7 1102.55   65.05
   1  -2   7 1057.82   65.28
   1   2  -7 1081.91   65.34
  -2  -2   7    3.20    1.42
  -2   2  -7    4.81    1.62
   2   2   7    2.43    1.21
   2  -2  -7    3.25    1.58
   2   2  -7    3.25    1.53
   2  -2   7    2.95    1.55
  -2  -2  -7    2.20    1.33
  -2   2   7    2.31    1.33
  -3  -2   7   55.54    5.18
   3   2   7   64.70    4.98
   3  -2  -7   75.46    5.59
   3  -2   7   64.45    5.39
  -3   2   7   77.36    5.51
   3   2  -7   61.80    5.54
   4   2   7   23.91    2.67
   4  -2  -7   21.76    3.31
   4   2  -7   26.34    3.61
   4  -2   7   19.69    3.03
   5  -2  -7   13.22    2.76
   5   2  -7   17.42    3.10
   6   2   7   96.83    7.06
   6  -2  -7   95.82    7.72
   6   2  -7   97.72    7.76
   7   2   7   86.37    6.66
   7  -2  -7   78.49    6.98
   7   2  -7   82.35    6.99
   8   2   7  572.92   34.95
   8   2  -7  542.27   35.59
   8  -2   7  560.72   35.39
   9  -2  -7   99.52    8.67
   9   2   7  104.25    8.04
   9  -2   7  104.71    9.40
   9   2  -7  101.24    8.70
  10  -2  -7  534.92   34.95
  10   2   7  557.86   34.11
  10  -2   7  535.67   34.58
  10   2  -7  526.30   34.75
  11   2   7   92.97    8.66
  11  -2  -7   85.39    8.62
  11   2  -7   84.37    8.36
  11  -2   7  106.37    8.73
  12  -2  -7   54.26    6.41
  12   2   7   47.52    5.76
  12  -2   7   47.77    6.40
  12   2  -7   34.88    5.88
  13   2   7    0.02    2.74
  13  -2  -7   -0.57    2.41
  13  -2   7   -0.13    2.75
  13   2  -7   -2.92    2.29
  14   2   7   12.10    3.61
  14  -2  -7    7.33    3.67
  14   2  -7    9.73    3.81
  14  -2   7   16.75    4.62
  15  -2  -7   24.57    5.20
  15   2   7   28.18    4.85
  15   2  -7   32.13    6.19
  15  -2   7   43.92    8.04
  16   2   7  114.53   10.15
  16  -2  -7  113.15   11.50
  16   2  -7  126.51   11.40
  16  -2   7  109.54   10.86
  17  -2  -7   27.12    6.28
  17   2   7   31.45    5.50
  17  -2   7   19.86    5.59
  17   2  -7   22.53    5.88
  18   2   7   49.46    7.05
  18  -2  -7   58.69    9.61
  18  -2   7   52.51    8.20
  18   2  -7   47.86    7.76
   0   2   8   89.34    6.88
   0   2  -8  100.78    7.23
   0  -2  -8   94.61    6.99
   0  -2   8   97.34    7.19
   1  -2  -8   97.59    7.25
   1   2   8   94.45    7.40
  -1  -2   8  101.95    7.37
  -1   2  -8  101.26    7.26
  -1  -2  -8   97.13    7.01
   1   2  -8   94.85    7.31
   1  -2   8   97.96    7.35
  -1   2   8   93.79    7.08
   2  -2  -8    2.37    1.49
   2   2   8    2.78    1.48
  -2   2  -8    4.13    1.54
   2  -2   8    2.25    1.61
  -2  -2  -8    5.93    1.49
   2   2  -8    2.61    1.64
  -2   2   8    2.87    1.44
   3  -2  -8    0.03    1.25
  -3  -2  -8    0.90    1.22
   3  -2   8    0.80    1.77
   3   2  -8    0.12    1.40
   4   2   8    0.96    1.18
   4  -2  -8    0.21    1.42
   4   2  -8    1.60    1.39
   5  -2  -8   52.75    5.02
   5   2   8   48.75    4.34
   5   2  -8   51.99    5.06
   6   2   8   20.93    2.76
   6  -2  -8   17.76    3.29
   6   2  -8   24.16    3.58
   7  -2  -8   26.83    4.08
   7   2  -8   23.59    4.00
   8   2   8   17.77    3.06
   8  -2  -8   11.55    2.89
   8  -2   8   10.67    3.41
   8   2  -8   13.05    3.34
   9  -2  -8    1.27    2.27
   9   2   8   -0.16    2.17
   9   2  -8   -0.48    2.06
   9  -2   8    0.32    2.43
  10  -2  -8    7.51    3.04
  10   2   8    1.90    2.62
  10   2  -8    5.10    2.83
  10  -2   8    6.17    3.11
  11   2   8   15.12    4.12
  11  -2  -8    6.40    3.07
  11  -2   8    1.54    3.14
  11   2  -8    7.02    2.86
  12   2   8    4.51    2.63
  12  -2  -8    3.70    2.82
  12   2  -8    3.64    2.57
  12  -2   8    7.47    3.27
  13  -2  -8    1.04    2.63
  13   2   8    1.13    2.83
  13  -2   8    5.61    3.10
  13   2  -8   -0.36    2.49
  14   2   8    8.05    3.58
  14  -2  -8    5.09    3.62
  14  -2   8    6.86    3.96
  14   2  -8    2.55    3.51
  15   2   8   -7.22    2.78
  15  -2  -8   -0.06    3.65
  15   2  -8    3.10    3.45
  15  -2   8   -4.15    3.38
  16  -2  -8    5.91    4.50
  16   2   8    3.75    3.99
  16  -2   8    4.03    4.61
  16   2  -8   -1.22    3.58
  17   2   8   -4.90    3.20
  17  -2  -8   -0.53    4.04
  17  -2   8   -3.29    4.48
  17   2  -8   -0.43    3.85
  18   2   8   -5.90    4.03
  18  -2  -8    0.07    4.65
  18  -2   8    3.45    4.77
   0  -2  -9  228.00   14.38
   0   2   9  210.54   14.17
   0   2  -9  208.98   14.42
  -1   2  -9   15.42    2.82
   1   2   9   24.07    2.82
   1  -2  -9   21.62    2.99
  -1  -2  -9   24.60    3.08
   1   2  -9   16.07    2.87
  -1   2   9   29.04    3.05
   2   2   9  603.74   37.37
  -2   2  -9  602.96   37.53
   2  -2  -9  619.45   37.70
  -2  -2  -9  602.14   37.28
   2   2  -9  595.92   37.78
   3   2   9   20.07    2.87
   3  -2  -9   17.50    3.10
  -3  -2  -9   19.69    2.82
   3   2  -9   18.93    3.44
   4   2   9  122.66    9.02
   4  -2  -9  133.96    9.63
   4   2  -9  130.33    9.67
   5   2   9   91.90    7.39
   5  -2  -9  109.06    8.16
   5   2  -9   99.72    8.08
   6  -2  -9  225.31   15.45
   6   2  -9  213.65   15.28
   7  -2  -9  142.69   11.17
   7   2  -9  151.60   11.27
   8  -2  -9  159.16   12.15
   8   2   9  160.45   11.45
   8   2  -9  151.85   11.98
   9  -2  -9  432.05   29.25
   9   2   9  444.89   28.41
   9  -2   9  443.74   28.90
   9   2  -9  452.26   29.38
  10   2   9   17.14    3.87
  10  -2  -9   13.49    3.55
  10   2  -9   14.67    3.87
  10  -2   9   25.25    4.65
  11   2   9   32.63    4.95
  11  -2  -9   28.57    5.18
  11   2  -9   33.75    5.30
  11  -2   9   36.19    5.82
  12   2   9   26.41    4.60
  12  -2  -9   25.70    5.43
  12   2  -9   25.39    4.96
  12  -2   9   17.51    4.75
  13  -2  -9   36.79    7.65
  13   2   9   55.39    6.36
  13  -2   9   56.61    7.42
  13   2  -9   49.99    7.15
  14  -2  -9   70.44    8.41
  14   2   9   66.43    7.51
  14  -2   9   66.31    8.20
  14   2  -9   80.23    8.56
  15  -2  -9   75.93    8.85
  15   2   9   59.29    7.21
  15   2  -9   55.42    8.14
  15  -2   9   72.81    8.57
  16  -2  -9    1.66    3.94
  16  -2   9   -5.94    3.67
  16   2  -9    3.16    3.69
  17   2   9    9.48    4.37
  17  -2  -9    3.89    5.73
  17   2  -9    7.18    4.64
  17  -2   9   16.24    5.20
   0  -2 -10    1.83    1.46
   0   2 -10    0.85    1.54
  -1   2 -10   67.80    5.65
   1   2  10   66.67    5.46
   1  -2 -10   64.87    5.60
   1   2 -10   57.51    5.53
  -1  -2 -10   65.47    5.44
   2  -2 -10   -1.45    1.40
  -2   2 -10    1.59    1.39
   2   2  10    0.58    1.24
  -2  -2 -10    0.49    1.27
   2   2 -10   -1.02    1.18
   3   2  10   -0.23    1.26
   3  -2 -10    0.20    1.55
  -3  -2 -10    0.89    1.45
   3   2 -10    0.29    1.58
   4  -2 -10    0.83    1.61
   4   2 -10    2.24    1.67
   5  -2 -10   33.56    4.83
   5   2 -10   38.39    4.43
   6  -2 -10    1.66    2.20
   6   2 -10    5.17    2.31
   7  -2 -10   21.99    3.99
   7   2 -10   25.25    4.17
   8  -2 -10    9.13    3.20
   8   2 -10    8.33    3.09
   9   2  10   -1.35    2.24
   9  -2 -10    1.86    2.64
   9  -2  10   -3.11    2.42
   9   2 -10    2.20    2.08
  10  -2 -10   11.79    3.87
  10  -2  10   12.72    3.79
  10   2 -10   11.90    3.48
  11  -2 -10    0.11    2.50
  11   2  10    2.04    3.03
  11   2 -10    1.42    2.91
  11  -2  10    0.90    3.09
  12   2  10   -1.40    3.02
  12  -2 -10    1.68    2.87
  12  -2  10    0.87    3.29
  12   2 -10    2.94    3.03
  13  -2 -10    3.95    3.68
  13   2  10    1.38    2.98
  13   2 -10   -0.44    3.06
  13  -2  10   -0.17    3.52
  14   2  10    7.44    3.41
  14  -2 -10   15.19    4.66
  14   2 -10   13.55    4.07
  15  -2 -10    0.50    3.73
  15   2  10    2.21    3.66
  15  -2  10    1.24    3.92
  15   2 -10    1.60    3.26
  16   2  10   12.44    4.34
  16  -2 -10    5.86    4.51
  16   2 -10    4.17    4.06
  16  -2  10    8.56    4.65
  17  -2 -10    1.13    4.73
  17   2  10    1.02    4.36
  17   2 -10   -4.14    4.90
  17  -2  10   -7.57    4.39
   0   2 -11  990.14   60.71
   0  -2 -11  982.38   60.51
   1  -2 -11   40.08    4.59
  -1   2 -11   47.16    4.47
   1   2 -11   52.60    4.91
  -1  -2 -11   43.00    4.39
   2  -2 -11   50.65    4.85
  -2   2 -11   38.51    4.36
   2   2 -11   48.18    4.98
  -2  -2 -11   48.22    4.43
   3  -2 -11   59.36    6.11
  -3  -2 -11   70.26    5.71
   3   2 -11   74.08    6.40
   4  -2 -11   29.90    4.62
   4   2 -11   29.66    4.82
   5  -2 -11  114.43   10.82
   5   2 -11  111.59    9.28
   6  -2 -11  262.99   18.18
   6   2 -11  259.27   18.20
   7  -2 -11  105.60    9.18
   7   2 -11  105.91    9.21
   8  -2 -11   61.04    6.69
   8   2 -11   53.42    6.38
   9  -2 -11    4.07    2.77
   9   2  11   10.68    3.67
   9   2 -11    5.91    3.04
  10   2  11   15.66    3.83
  10  -2 -11   23.77    4.68
  10   2 -11   12.82    3.71
  10  -2  11   21.33    4.67
  11   2  11   52.14    6.46
  11  -2 -11   36.47    6.33
  11  -2  11   53.53    6.85
  11   2 -11   41.34    6.30
  12   2  11   12.00    3.79
  12  -2 -11    7.63    3.50
  12  -2  11    3.16    3.78
  13   2  11    3.10    3.33
  13  -2 -11    3.21    3.74
  13  -2  11    1.35    3.80
  13   2 -11    4.22    3.66
  14   2  11   76.70    8.37
  14  -2 -11   75.73    9.47
  14  -2  11  103.62    9.83
  14   2 -11  102.06   10.14
  15   2  11  114.87   11.10
  15  -2 -11  136.68   12.64
  15  -2  11  116.14   11.73
  15   2 -11  142.56   12.48
  16   2  11    2.42    4.20
  16  -2 -11    4.41    4.66
  16  -2  11    6.81    4.46
  16   2 -11    4.63    4.44
  17   2  11   -1.37    4.50
  17  -2 -11    2.19    4.91
  17   2 -11   -3.69    4.31
  17  -2  11   -7.94    4.63
   0  -2 -12   20.92    3.22
   0   2 -12   16.84    3.28
   1  -2 -12   26.95    3.96
  -1   2 -12   22.48    3.55
   1   2 -12   22.01    3.76
  -1  -2 -12   24.80    3.58
  -2   2 -12   -0.72    1.41
   2  -2 -12    5.39    1.77
  -2  -2 -12    0.09    1.66
   2   2 -12    0.23    1.85
   3  -2 -12    2.68    1.97
  -3   2 -12    2.28    1.56
  -3  -2 -12   -0.58    1.58
   3   2 -12    1.24    1.87
   4  -2 -12   -0.25    1.89
   4   2 -12   -1.33    1.84
   5  -2 -12    5.55    2.45
   5   2 -12    5.17    2.51
   6  -2 -12    2.59    2.07
   6   2 -12   -0.74    2.05
   7  -2 -12    3.88    2.55
   7   2 -12    3.96    2.65
   8  -2 -12   16.74    4.00
   8   2 -12   12.75    3.40
   9  -2 -12    6.75    2.91
   9   2 -12    2.13    2.65
  10  -2 -12    2.60    3.10
  10   2  12    8.11    3.21
  10  -2  12    8.02    3.81
  10   2 -12    5.37    3.11
  11  -2 -12    6.28    4.15
  11   2  12   -2.79    2.88
  11   2 -12    1.22    3.17
  11  -2  12   -1.90    3.15
  12   2  12    2.53    3.40
  12  -2 -12    1.76    3.41
  12   2 -12    3.00    3.51
  12  -2  12    4.11    3.43
  13   2  12   -0.50    2.95
  13  -2 -12   -3.08    3.06
  13   2 -12    4.94    4.22
  14  -2 -12   -1.97    3.59
  14   2  12    6.94    4.22
  14   2 -12    7.89    3.72
  14  -2  12    6.92    4.26
  15  -2 -12    5.90    4.30
  15  -2  12    1.09    4.08
  15   2 -12    2.73    4.33
  16  -2 -12    1.67    4.49
  16   2  12    2.87    4.68
  16  -2  12    2.28    4.64
  16   2 -12   -2.28    5.04
   0  -2 -13   61.95    5.87
  -1   2 -13  741.92   46.87
   1  -2 -13  766.22   46.98
  -1  -2 -13  729.40   46.63
   1   2 -13  758.27   47.05
  -2   2 -13   78.87    6.79
  -2  -2 -13   67.65    6.42
   2   2 -13   83.59    7.26
   3  -2 -13  102.30    8.61
  -3   2 -13  101.15    8.29
   3   2 -13  101.43    8.73
  -3  -2 -13   97.46    7.94
   4  -2 -13  412.78   27.57
   4   2 -13  421.74   27.68
   5  -2 -13   66.15    6.97
   5   2 -13   64.98    6.75
   6  -2 -13   20.21    4.57
   6   2 -13   32.65    5.30
   7  -2 -13   49.22    6.85
   7   2 -13   58.34    7.37
   8  -2 -13    7.47    3.31
   8   2 -13   16.13    3.87
   9  -2 -13   -1.14    2.57
   9   2 -13    0.33    2.52
  10   2  13   14.59    4.14
  10  -2 -13   11.62    4.07
  10   2 -13    5.35    3.60
  10  -2  13   16.33    4.49
  11  -2 -13    1.15    3.43
  11   2  13    7.66    3.55
  11   2 -13    2.99    3.31
  11  -2  13   -1.09    3.38
  12  -2 -13  733.39   48.91
  12   2  13  748.27   47.50
  12  -2  13  740.02   48.11
  12   2 -13  774.61   49.08
  13  -2 -13   14.26    5.21
  13   2  13    2.07    3.42
  13   2 -13    8.55    4.44
  13  -2  13   10.75    4.88
  14  -2 -13   71.28    9.72
  14   2  13   67.30    8.36
  14  -2  13   79.45    9.04
  14   2 -13   62.52    9.20
  15   2  13   -1.64    4.13
  15  -2 -13    1.21    4.97
  15  -2  13   -2.85    4.36
  15   2 -13   -0.85    4.49
  16  -2 -13   -0.77    4.66
  16   2  13    2.66    4.74
  16   2 -13    4.49    4.70
  16  -2  13   12.45    5.32
   0   2 -14    9.70    3.01
   1  -2 -14   -0.96    2.44
  -1   2 -14    5.34    2.32
   1   2 -14    4.15    2.65
  -1  -2 -14    6.84    2.83
  -2   2 -14   -0.89    2.04
   2  -2 -14    1.08    2.35
   2   2 -14    4.02    2.53
  -2  -2 -14    2.01    2.04
  -3   2 -14   12.20    3.13
   3  -2 -14    8.98    3.26
   3   2 -14    6.76    2.76
  -3  -2 -14    7.51    2.63
   4  -2 -14    3.85    2.72
   4   2 -14   -3.23    2.14
   5  -2 -14   -3.51    1.98
   5   2 -14    0.05    2.46
   6  -2 -14   -0.74    2.30
   6   2 -14    0.25    2.15
   7  -2 -14   10.59    3.41
   7   2 -14    9.51    3.27
   8  -2 -14   -2.96    2.81
   8   2 -14    0.85    2.73
   9  -2 -14    0.06    3.22
   9   2 -14    4.75    3.26
  10   2  14    3.36    3.35
  10  -2 -14    3.98    3.37
  10   2 -14    3.16    3.35
  11  -2 -14   -2.71    3.04
  11   2  14    2.58    3.47
  11   2 -14    1.83    3.59
  11  -2  14    6.21    4.17
  12  -2 -14    4.20    3.79
  12   2  14    2.14    3.61
  12  -2  14    2.12    4.00
  12   2 -14    2.22    3.57
  13  -2 -14    5.34    4.27
  13   2  14    9.64    3.79
  13  -2  14   -0.82    3.89
  13   2 -14    5.61    4.35
  14  -2 -14    6.26    4.59
  14   2 -14   -5.45    3.92
  14  -2  14   10.83    4.59
  15   2  14    7.79    4.80
  15  -2 -14    2.69    4.98
  15  -2  14    8.02    5.49
  15   2 -14    4.60    7.95
   0  -2 -15   18.36    3.81
   0   2 -15   15.35    3.58
  -1   2 -15   13.59    3.44
   1  -2 -15    9.66    3.36
   1   2 -15   17.19    3.94
  -1  -2 -15   11.42    3.23
  -2   2 -15  506.14   30.80
   2  -2 -15  445.86   30.82
  -2  -2 -15  461.11   30.33
   2   2 -15  470.97   30.92
  -3   2 -15  147.06   11.70
   3  -2 -15  160.69   12.22
   3   2 -15  159.29   12.33
  -3  -2 -15  155.97   11.77
   4  -2 -15    1.05    2.69
   4   2 -15    0.97    2.43
   5  -2 -15    1.66    2.28
   5   2 -15   -0.65    2.42
   6  -2 -15   52.67    7.10
   6   2 -15   42.27    6.80
   7  -2 -15   70.00    8.08
   7   2 -15   85.55    8.51
   8  -2 -15   19.40    4.84
   8   2 -15   28.82    5.82
   9  -2 -15   10.43    4.17
   9   2 -15   12.27    4.09
  10   2  15  206.15   15.87
  10  -2 -15  196.57   16.65
  10   2 -15  237.27   17.24
  11  -2 -15   76.90    9.11
  11   2  15   69.65    8.40
  11   2 -15   76.18    8.77
  12  -2 -15   11.35    4.63
  12   2  15   18.59    4.80
  12  -2  15   14.46    4.82
  12   2 -15   16.42    4.87
  13  -2 -15  102.82   11.50
  13   2  15  104.46   10.05
  13   2 -15   92.63   11.08
  13  -2  15   98.30   10.52
  14   2  15   65.60    8.43
  14  -2  15   53.45    9.03
  14   2 -15   55.12    9.73
  15   2  15   -2.19    4.76
  15  -2 -15    2.76    5.12
  15   2 -15    5.15    5.36
  15  -2  15    1.69    5.28
   0   2 -16    3.60    2.53
   0  -2 -16    0.38    2.36
   1  -2 -16    8.51    3.20
  -1   2 -16    3.83    2.63
  -1  -2 -16   11.48    3.21
   1   2 -16    9.10    3.14
   2  -2 -16    4.83    2.83
  -2   2 -16    7.94    2.89
   2   2 -16    1.32    2.93
  -2  -2 -16    3.88    2.46
   3  -2 -16   -1.93    2.52
  -3  -2 -16    4.66    2.32
   3   2 -16    3.71    2.70
   4  -2 -16    6.10    3.06
   4   2 -16    2.27    2.54
   5  -2 -16    2.92    2.86
   5   2 -16    2.93    2.80
   6  -2 -16    1.29    2.44
   6   2 -16    0.04    2.64
   7  -2 -16   -0.47    2.76
   7   2 -16    3.38    3.50
   8  -2 -16    1.37    3.25
   8   2 -16    3.50    3.26
   9  -2 -16   12.82    4.29
   9   2 -16   10.97    4.49
  10  -2 -16    6.70    3.87
  10   2 -16    0.21    3.51
  11  -2 -16    6.73    4.58
  11   2  16    5.58    3.82
  11  -2  16   16.24    4.79
  11   2 -16    5.60    4.28
  12   2  16    7.13    4.04
  12  -2 -16   -0.89    4.16
  12  -2  16    0.24    4.25
  12   2 -16   -1.46    3.57
  13   2  16    8.11    4.52
  13  -2 -16    5.27    5.06
  13   2 -16    4.35    4.76
  13  -2  16    3.30    4.30
  14   2  16    4.71    4.57
  14  -2 -16   11.13    5.63
  14   2 -16  -10.99    4.14
  14  -2  16    0.72    5.05
   0   2 -17  189.89   14.13
   0  -2 -17  180.59   14.03
  -1   2 -17    5.09    2.77
   1  -2 -17    5.77    2.57
   1   2 -17    5.80    3.16
  -1  -2 -17    3.73    2.79
   2  -2 -17    1.26    2.63
  -2   2 -17    0.71    2.11
   2   2 -17   -0.39    2.45
  -2  -2 -17    0.82    2.51
   3  -2 -17   51.23    7.10
  -3  -2 -17   54.87    6.17
   3   2 -17   55.61    7.43
   4  -2 -17   12.67    3.87
   4   2 -17    6.95    3.04
   5  -2 -17   11.33    3.96
   5   2 -17   -0.09    2.89
   6  -2 -17   31.97    5.91
   7  -2 -17   31.97    5.90
   7   2 -17   29.15    5.99
   8  -2 -17   10.13    4.70
   8   2 -17   12.69    4.57
   9  -2 -17  204.35   16.95
   9   2 -17  205.36   16.90
  10  -2 -17   11.51    4.47
  10   2 -17    3.20    4.08
  11   2  17   -4.92    3.94
  11  -2 -17    2.22    4.43
  11   2 -17    2.88    3.86
  11  -2  17    1.65    4.17
  12   2  17   18.75    5.10
  12  -2 -17   33.54    6.90
  12  -2  17   32.20    6.64
  12   2 -17   47.93    8.06
  13   2  17   54.36    8.13
  13  -2 -17   55.42    8.65
  13   2 -17   37.51    7.59
  13  -2  17   50.84    8.55
   0   2 -18    4.09    3.18
   0  -2 -18   -1.98    2.40
   1  -2 -18    0.63    2.61
  -1   2 -18    2.18    2.75
  -1  -2 -18    5.69    2.79
   1   2 -18   -2.26    2.72
   2  -2 -18   -0.43    2.56
  -2   2 -18    5.66    2.94
   2   2 -18    0.62    2.60
  -2  -2 -18    4.23    2.62
   3  -2 -18    4.46    2.90
   3   2 -18    1.53    3.12
  -3  -2 -18    9.71    3.16
   4  -2 -18   -4.61    2.66
   5   2 -18   -0.55    2.81
   6  -2 -18   -0.16    3.02
   6   2 -18    5.52    3.52
   7  -2 -18   13.21    4.76
   7   2 -18    5.51    3.66
   8  -2 -18    1.55    3.71
   8   2 -18   -0.38    3.20
   9  -2 -18    6.96    4.31
   9   2 -18    9.10    4.24
  10  -2 -18   -0.47    4.29
  10   2 -18   -0.28    3.90
  11   2  18    5.21    4.23
  11  -2 -18    4.67    4.29
  11   2 -18   -4.29    4.25
  12   2  18    0.22    4.48
  12  -2 -18    1.37    4.66
  12  -2  18    2.19    4.63
  12   2 -18   -0.35    4.66
  13  -2 -18    0.65    4.98
  13   2 -18   -4.65    4.63
   0  -2 -19   12.77    3.63
   0   2 -19   13.83    5.10
   1  -2 -19   22.02    4.77
  -1   2 -19   23.28    4.60
  -1  -2 -19   23.54    4.83
  -2   2 -19    5.00    3.01
   2  -2 -19    7.36    3.60
  -2  -2 -19   11.02    3.67
   2   2 -19    6.41    3.31
   3  -2 -19  224.80   18.03
   3   2 -19  214.72   16.92
  -3  -2 -19  214.55   16.07
   4  -2 -19    4.22    3.42
   4   2 -19   -0.91    3.26
   5  -2 -19   22.26    5.69
   5   2 -19   32.10    5.81
   6  -2 -19   64.48    8.95
   6   2 -19   63.42    8.68
   7  -2 -19   28.06    5.96
   7   2 -19   44.75    7.55
   8  -2 -19   81.97   10.46
   8   2 -19   65.81    9.44
   9  -2 -19   18.09    5.46
   9   2 -19   12.66    4.96
  10  -2 -19   36.71    7.11
  10   2 -19   22.38    5.96
  11  -2 -19    8.47    5.58
  11   2  19    2.79    4.78
  11   2 -19    7.18    5.45
  12  -2 -19   34.67    7.91
  12   2  19   47.76    7.80
  12   2 -19   42.09    7.91
  12  -2  19   73.48    9.52
   0  -2 -20   15.50    4.75
   0   2 -20   16.09    4.63
  -1   2 -20    7.64    3.56
   1  -2 -20   10.72    6.80
  -1  -2 -20   13.21    4.14
   1   2 -20   13.07    3.99
  -2   2 -20    3.75    2.93
   2  -2 -20   -3.72    3.21
   2   2 -20   -1.09    3.03
  -2  -2 -20   -5.57    2.69
   3  -2 -20   -1.84    3.10
   3   2 -20    3.27    3.10
   4  -2 -20    6.02    3.68
   4   2 -20    5.19    4.12
   5  -2 -20    0.75    3.28
   5   2 -20    0.54    3.12
   6  -2 -20   -2.14    3.70
   6   2 -20    6.38    3.77
   7  -2 -20    5.05    4.64
   7   2 -20    4.63    4.32
   8  -2 -20    2.48    4.59
   8   2 -20   -2.89    4.32
   9  -2 -20   12.34    5.84
   9   2 -20    9.03    5.17
  10  -2 -20    0.76    4.90
  10   2 -20   -5.14    4.66
  11  -2 -20   -4.22    5.20
  11   2 -20    8.07    5.41
   0   2 -21  141.54   12.83
   0  -2 -21  164.78   13.08
   1  -2 -21  225.48   17.60
  -1   2 -21  231.26   17.63
   1   2 -21  229.76   17.71
  -1  -2 -21  228.02   17.39
  -2   2 -21   76.27    8.80
   2  -2 -21   86.11    9.35
   2   2 -21   99.68    9.74
  -2  -2 -21   87.07    9.28
   3  -2 -21   -7.19    3.29
   3   2 -21    2.69    3.79
   4  -2 -21    3.25    4.13
   4   2 -21    1.84    3.80
   5  -2 -21    6.73    4.64
   5   2 -21   13.97    4.88
   6  -2 -21    8.32    4.47
   6   2 -21    8.89    4.82
   7  -2 -21   75.55   10.48
   7   2 -21   84.38   10.16
   8  -2 -21   -4.67    4.81
   9  -2 -21   16.20    6.15
   9   2 -21   18.71    6.66
   0   2 -22    1.48    2.76
   0  -2 -22    2.06    3.80
  -1   2 -22   17.98    4.59
   1  -2 -22    5.87    4.47
  -1  -2 -22   21.38    4.84
   1   2 -22   18.63    4.80
   2  -2 -22    4.38    4.03
   2   2 -22    9.18    4.23
  -2  -2 -22   12.71    4.49
   3  -2 -22   -2.13    3.76
   3   2 -22    3.16    3.81
   4  -2 -22    3.38    4.29
   4   2 -22    3.56    4.45
   5  -2 -22   -1.97    3.99
   5   2 -22   -1.25    4.10
   6  -2 -22   -2.84    4.22
   6   2 -22    4.47    4.91
   7   2 -22    8.78    5.36
   8  -2 -22   -4.45    5.45
   8   2 -22   -2.86    4.51
   0  -2 -23   17.12    4.64
   0   2 -23   15.13    4.61
   1  -2 -23    1.34    4.06
  -1   2 -23    8.32    4.29
  -1  -2 -23    5.40    4.77
   1   2 -23    8.56    3.95
   2  -2 -23   30.79    6.31
   2   2 -23   28.00    6.24
  -2  -2 -23   33.50    6.34
   3  -2 -23   17.72    5.54
   3   2 -23   14.75    4.51
   4  -2 -23    1.21    5.08
   5  -2 -23   31.96    9.07
   5   2 -23   33.64    7.23
   6  -2 -23    8.79    5.37
   6   2 -23   18.46    5.82
   0  -2 -24    0.11    4.39
   1  -2 -24    9.33    5.40
   1   2 -24    5.90    5.50
  -1  -2 -24    5.53    4.16
   2  -2 -24    8.16    4.97
   2   2 -24    5.78    4.43
   3   2 -24    6.19    4.92
   1  -3   0  695.74   44.67
   1   3   0  787.22   44.45
  -2   3   0    1.05    1.05
   2   3   0    0.82    0.47
  -2  -3   0    0.46    0.47
   2  -3   0    0.68    1.07
   3  -3   0 1144.96   68.52
   3   3   0 1201.75   68.16
  -3  -3   0 1125.12   68.10
  -3   3   0 1070.67   68.48
  -4  -3   0    0.80    0.75
  -4   3   0    1.45    1.23
   4  -3   0    1.52    1.27
   4   3   0    2.99    0.80
  -5   3   0  275.09   18.98
  -5  -3   0  302.65   18.63
   5   3   0  317.76   18.62
   5  -3   0  296.41   19.05
   6   3   0    2.14    1.38
  -6   3   0    2.30    1.90
  -6  -3   0    3.00    1.67
   6  -3   0   -0.33    2.00
   7   3   0  633.91   38.06
  -7  -3   0  633.63   38.13
   7  -3   0  587.80   38.43
   8   3   0    1.99    1.47
   8  -3   0    4.99    2.34
  -8  -3   0    1.71    1.60
   9   3   0  660.61   41.43
   9  -3   0  678.65   41.90
  10   3   0    2.80    1.83
  10  -3   0    1.17    2.52
  11  -3   0  328.23   22.56
  11   3   0  346.44   22.20
  12   3   0   -2.50    1.83
  12  -3   0   -0.68    2.54
  13   3   0  130.76   10.19
  13  -3   0  116.78   10.29
  14   3   0   -3.53    2.44
  14  -3   0    7.89    3.64
  15   3   0  403.87   26.97
  16   3   0   -0.81    2.63
  16  -3   0    0.61    3.42
  17  -3   0   39.18    6.40
  17   3   0   43.86    6.39
  18  -3   0   -0.53    4.60
  18   3   0    8.26    3.60
  19   3   0    3.11    4.19
  19  -3   0    1.37    6.62
   0   3   1    0.23    0.62
   0  -3  -1    0.12    0.56
   0  -3   1    0.52    0.53
   1  -3  -1  380.39   26.65
   1   3  -1  501.37   26.68
   2   3   1  206.48   12.40
  -2  -3   1  217.80   12.69
   2  -3  -1  189.74   12.87
   2   3  -1  222.78   12.72
  -2   3   1  187.97   12.86
   3   3   1  447.23   26.77
  -3  -3   1  468.85   26.99
   3  -3  -1  395.32   27.17
   3  -3   1  431.03   27.27
  -3   3   1  454.28   27.28
   3   3  -1  496.49   27.06
  -3  -3  -1  412.51   26.76
  -4  -3   1  662.12   38.42
   4   3   1  622.46   38.23
   4  -3  -1  614.83   38.71
  -4  -3  -1  604.08   38.25
   4  -3   1  643.75   38.78
   4   3  -1  660.55   38.47
  -4   3   1  624.45   38.73
   5  -3  -1 1176.68   67.18
  -5   3  -1 1077.60   67.14
  -5  -3   1 1060.44   66.68
   5   3   1 1124.19   66.59
  -5  -3  -1 1082.36   66.62
  -5   3   1 1030.58   67.02
   5   3  -1 1159.27   66.82
   5  -3   1 1133.98   67.14
   6  -3  -1   57.64    5.24
  -6   3  -1   61.72    5.38
   6   3   1   56.95    4.96
  -6  -3   1   60.26    4.86
   6  -3   1   65.71    5.45
   6   3  -1   60.31    4.71
  -6  -3  -1   51.97    4.70
  -6   3   1   52.54    5.16
   7  -3  -1  147.61   10.06
   7   3   1  129.15    9.28
  -7  -3   1  134.93    9.49
   7   3  -1  136.15    9.48
   7  -3   1  136.97    9.96
   8  -3  -1  278.35   17.75
  -8  -3   1  274.88   17.83
   8   3   1  270.48   17.16
  -8  -3  -1  245.99   17.20
   8   3  -1  264.48   17.26
   8  -3   1  261.49   17.63
   9   3   1   84.23    6.67
   9  -3  -1   83.43    7.33
   9  -3   1   88.01    7.41
   9   3  -1   82.06    6.74
  10   3   1  304.22   18.93
  10  -3  -1  271.98   19.31
  10  -3   1  289.83   19.61
  10   3  -1  283.13   19.00
  11  -3  -1    9.38    3.12
  11   3   1    7.62    2.43
  11   3  -1   11.08    3.06
  11  -3   1   14.81    3.86
  12  -3  -1   36.44    5.34
  12   3   1   30.14    4.40
  12   3  -1   32.05    4.75
  12  -3   1   30.15    5.26
  13  -3  -1   74.22    7.82
  13   3   1   78.10    7.30
  13  -3   1   74.88    7.84
  13   3  -1   89.24    7.70
  14   3   1  159.58   12.20
  14  -3  -1  163.07   12.62
  14   3  -1  155.18   12.11
  14  -3   1  147.85   12.53
  15   3   1   85.17    8.33
  15  -3  -1   86.15   13.47
  15   3  -1   89.87    8.62
  16  -3  -1   14.22    4.64
  16   3   1   21.89    4.52
  16  -3   1   13.24    4.56
  16   3  -1   14.79    4.12
  17  -3  -1   -4.82    3.41
  17   3   1    1.59    3.24
  17  -3   1   -2.43    3.79
  17   3  -1    0.07    3.05
  18  -3  -1   -0.40    3.92
  18   3   1   -5.84    3.18
  18  -3   1    3.11    4.27
  18   3  -1   -2.22    3.36
  19  -3  -1    0.51    5.13
  19   3   1    1.74    3.92
  19  -3   1    3.60    7.18
  19   3  -1   -2.36    4.27
   0  -3  -2    0.95    0.50
   0   3   2    1.10    0.57
   0   3  -2    0.39    0.62
   0  -3   2    0.04    0.55
  -1  -3   2   30.08    2.31
  -1   3   2   23.50    2.24
   1   3  -2   30.93    2.31
   2  -3  -2  104.04    7.20
  -2  -3   2  115.92    7.15
   2   3  -2  109.35    7.15
   3  -3  -2  151.68    9.78
  -3  -3   2  158.10    9.58
   3   3   2  141.19    9.21
   3   3  -2  161.36    9.65
  -3   3   2  134.84    9.66
   4  -3  -2    3.10    1.41
   4   3   2    2.17    0.90
   4  -3   2    7.64    1.74
  -4   3   2    7.01    1.61
   4   3  -2    6.81    1.27
  -4  -3  -2    0.43    0.95
  -5  -3   2 3117.27  184.02
   5   3   2 3154.65  183.77
   5  -3  -2 3205.97  184.36
  -5   3   2 2989.08  184.29
  -5  -3  -2 2961.87  183.80
   5  -3   2 2887.89  184.28
   5   3  -2 3188.72  184.12
  -6  -3   2    8.80    2.09
   6  -3  -2    7.23    2.17
   6   3  -2    7.07    1.85
   6  -3   2    6.72    2.46
  -6  -3  -2    9.92    2.20
  -6   3   2    8.69    2.34
   7  -3  -2   16.79    2.95
   7   3   2   17.72    2.37
  -7  -3   2   10.55    2.25
   7  -3   2   16.30    3.05
  -7  -3  -2   17.06    2.90
   7   3  -2   10.01    2.24
   8   3   2  180.38   11.87
   8  -3  -2  188.97   12.56
   8  -3   2  167.53   12.38
   8   3  -2  169.04   12.08
  -8  -3  -2  177.98   12.06
   9   3   2   60.09    5.24
   9  -3  -2   67.92    6.13
   9   3  -2   63.50    5.61
   9  -3   2   57.27    5.87
  10  -3  -2  105.90    8.17
  10   3   2   86.91    7.27
  10  -3   2   85.75    7.97
  10   3  -2   95.35    7.70
  11  -3  -2  254.22   17.82
  11   3   2  254.68   17.12
  11  -3   2  257.03   17.86
  12  -3  -2    5.31    3.07
  12   3   2    8.23    3.32
  12  -3   2   11.73    3.71
  12   3  -2    7.09    2.87
  13  -3  -2   66.18    6.73
  13   3   2   53.74    5.76
  13   3  -2   56.30    6.11
  13  -3   2   41.88    6.27
  14  -3  -2   95.85    9.09
  14   3   2   99.08    8.71
  14  -3   2   89.17    9.00
  14   3  -2  101.66    8.92
  15   3   2    3.11    3.22
  15  -3  -2   -0.29    3.06
  15  -3   2   -0.71    5.44
  15   3  -2    4.83    2.60
  16  -3  -2    2.97    3.40
  16   3   2   -0.49    3.05
  16  -3   2    4.22    3.81
  16   3  -2    2.42    3.53
  17  -3  -2   20.87    5.00
  17   3   2    9.31    4.15
  17   3  -2   13.21    4.19
  17  -3   2   14.43    5.12
  18   3   2    1.92    3.58
  18  -3  -2    7.03    4.58
  18  -3   2    4.69    4.99
  18   3  -2    0.07    3.34
  19  -3  -2    8.96    5.05
  19   3   2    0.21    4.38
  19   3  -2    3.39    4.19
   0  -3   3    0.52    0.65
   0   3   3   -0.22    0.45
   0  -3  -3    0.03    0.45
   0   3  -3   -0.04    0.59
   1  -3  -3  259.59   17.54
  -1  -3   3  305.22   17.78
   1   3   3  288.17   17.31
   1  -3   3  268.43   17.71
  -1   3   3  268.74   17.53
   1   3  -3  313.02   17.78
  -1  -3  -3  298.88   17.32
   2  -3  -3  225.98   15.31
  -2  -3   3  254.59   15.37
   2   3   3  249.01   14.91
  -2   3   3  231.24   15.29
   2   3  -3  268.10   15.47
  -3  -3   3  518.16   31.48
   3   3   3  513.08   31.06
   3   3  -3  533.70   31.56
  -3   3   3  494.62   31.50
   4  -3  -3  735.51   45.35
  -4  -3   3  763.68   45.19
   4   3   3  730.52   44.79
   4   3  -3  782.93   45.34
  -4   3   3  702.17   45.29
   5   3   3  555.38   35.53
  -5  -3   3  610.89   35.95
   5  -3  -3  549.85   36.09
   5  -3   3  616.43   36.27
  -5   3   3  549.61   36.05
   5   3  -3  628.31   36.08
   6  -3  -3   10.85    2.50
  -6  -3   3   12.95    2.26
   6   3  -3    8.66    2.05
   6  -3   3   10.42    2.69
   7  -3  -3    3.51    1.91
   7   3   3    1.23    1.56
  -7  -3   3    1.22    1.50
   7  -3   3   -0.86    1.71
   7   3  -3    1.08    1.35
   8   3   3   -0.34    1.48
   8  -3  -3    2.89    1.83
   8  -3   3   -0.77    1.91
   8   3  -3   -0.13    1.29
   9   3   3    0.76    1.74
   9  -3  -3    0.76    1.87
   9   3  -3   -1.69    1.27
   9  -3   3    2.04    2.12
  10   3   3    1.89    1.90
  10  -3  -3    4.78    2.43
  10   3  -3    2.98    2.11
  10  -3   3    7.96    3.09
  11   3   3   60.63    6.04
  11  -3  -3   64.84    6.71
  11  -3   3   67.38    7.00
  11   3  -3   71.93    6.51
  12  -3  -3   18.00    4.16
  12   3  -3   16.15    3.69
  12  -3   3   19.95    4.23
  13  -3  -3   17.36    4.28
  13   3   3   10.10    3.19
  13   3  -3    7.98    3.21
  13  -3   3    5.98    3.65
  14   3   3   18.89    4.33
  14  -3  -3   16.45    4.70
  14   3  -3   28.40    4.86
  14  -3   3   20.98    4.55
  15   3   3   -1.09    2.48
  15  -3  -3    1.86    3.37
  15   3  -3   -4.39    2.41
  16   3   3   57.90    6.70
  16  -3  -3   54.55    7.35
  16   3  -3   40.26    6.97
  16  -3   3   50.14    7.08
  17   3   3   10.59    3.70
  17  -3  -3    5.53    4.58
  17   3  -3   13.34    4.39
  17  -3   3    7.68    4.42
  18   3   3    4.30    3.93
  18  -3  -3    5.22    4.62
  18  -3   3    5.10    4.62
  18   3  -3    1.84    3.81
  19   3   3    0.47    4.52
  19  -3  -3   -7.67    4.28
  19  -3   3    0.39    6.61
  19   3  -3   -1.02    4.42
   0   3  -4    0.08    0.55
   0  -3   4   -0.55    0.62
   0   3   4    0.59    0.53
   0  -3  -4    0.28    0.51
   1   3   4  481.14   29.58
  -1   3  -4  501.56   30.00
  -1  -3   4  507.91   30.05
   1  -3  -4  453.75   29.79
   1  -3   4  487.95   30.02
  -1  -3  -4  497.99   29.61
  -1   3   4  471.36   29.76
   1   3  -4  516.10   30.05
  -2  -3   4  304.90   19.53
   2  -3  -4  309.92   19.52
   2   3   4  321.31   19.13
  -2   3   4  305.88   19.44
   2   3  -4  315.28   19.66
   2  -3   4  307.86   19.61
  -2  -3  -4  327.80   19.09
   3   3   4  843.50   50.61
  -3  -3   4  819.78   51.05
   3  -3  -4  858.10   51.16
  -3   3   4  824.72   51.05
   3   3  -4  860.94   51.18
  -4  -3   4  114.39    8.01
   4  -3  -4  118.95    8.21
   4   3   4  112.61    7.65
   4   3  -4  120.52    8.15
  -5  -3   4   20.01    2.68
   5  -3  -4   20.93    3.08
   5   3   4   19.80    2.55
  -5   3   4   17.24    2.69
   5   3  -4   15.53    2.55
  -6  -3   4    9.30    2.02
   6  -3  -4    5.45    2.02
   6   3   4   10.12    2.38
   6  -3   4    2.77    2.27
   6   3  -4    7.28    1.99
   7  -3  -4    0.89    1.81
   7   3   4    1.40    1.56
   7  -3   4    1.62    1.87
   7   3  -4    2.94    1.61
   8  -3  -4   41.75    4.60
   8   3   4   35.19    3.89
   8   3  -4   43.67    4.31
   8  -3   4   36.43    4.81
   9   3   4   17.48    2.89
   9   3  -4    8.58    2.48
   9  -3   4   12.42    3.31
  10  -3  -4    3.95    2.30
  10   3   4    5.83    2.31
  10  -3   4    5.78    2.95
  10   3  -4    6.26    2.64
  11  -3  -4    4.84    3.24
  11   3   4    7.53    2.72
  11   3  -4   14.79    3.12
  11  -3   4   13.93    3.65
  12  -3  -4    7.18    2.77
  12   3  -4   15.92    3.35
  12  -3   4   21.25    4.76
  13   3   4   20.80    3.79
  13  -3  -4   15.27    4.21
  13   3  -4   15.32    3.86
  13  -3   4   15.55    4.32
  14   3   4   33.08    4.89
  14  -3  -4   25.93    5.24
  14   3  -4   27.90    4.61
  14  -3   4   32.31    5.63
  15   3   4    0.79    2.70
  15  -3  -4    6.63    3.63
  15   3  -4    2.42    2.95
  16   3   4   55.02    6.68
  16  -3  -4   51.48    7.01
  16   3  -4   46.65    6.79
  16  -3   4   51.83    7.60
  17   3   4    3.82    4.05
  17  -3  -4    6.46    4.55
  17  -3   4    3.93    3.95
  17   3  -4    2.81    3.88
  18  -3  -4    1.86    4.56
  18   3   4   16.26    4.14
  18  -3   4    4.36    5.29
   0  -3  -5   -0.16    0.63
   0  -3   5   -0.18    0.66
   0   3  -5   -0.10    0.75
   0   3   5    0.87    0.60
  -1   3  -5   98.64    6.27
   1   3   5   85.23    5.80
   1  -3  -5   78.71    5.99
  -1  -3   5  101.72    6.34
  -1  -3  -5   86.84    5.83
  -1   3   5   79.82    5.92
  -2  -3   5    4.82    1.33
   2   3   5    6.77    1.15
  -2  -3  -5    7.21    1.07
   2   3  -5    5.76    1.48
   2  -3   5    6.52    1.39
  -2   3   5    7.12    1.41
   3   3   5  209.97   13.04
   3  -3  -5  212.09   13.60
   3   3  -5  200.71   13.57
   3  -3   5  208.79   13.58
  -3   3   5  208.82   13.46
   4   3   5    2.48    1.02
   4  -3  -5    3.97    1.51
  -4  -3   5    1.71    1.27
  -4   3   5    3.05    1.57
   4   3  -5    2.09    1.42
   5  -3  -5    4.62    1.79
   5   3   5    4.97    1.78
  -5  -3   5    2.37    1.40
  -5   3   5    4.84    1.81
   5   3  -5    2.05    1.62
   6   3   5   42.73    4.02
   6  -3  -5   41.66    4.58
   6   3  -5   50.58    4.51
   7  -3  -5  171.32   12.16
   7   3   5  164.41   11.40
   7  -3   5  169.18   12.16
   7   3  -5  181.70   12.06
   8  -3  -5   38.48    4.86
   8   3   5   41.35    4.25
   8   3  -5   52.70    4.92
   8  -3   5   49.51    5.26
   9   3   5   84.45    6.63
   9  -3  -5   85.26    7.47
   9   3  -5   74.63    6.91
   9  -3   5   84.48    7.32
  10  -3  -5   27.11    4.77
  10   3   5   28.09    3.97
  10  -3   5   25.52    4.74
  10   3  -5   34.23    4.85
  11  -3  -5   11.77    3.56
  11   3   5   12.10    3.11
  11   3  -5   16.99    3.69
  11  -3   5   15.48    4.13
  12  -3  -5   15.74    3.96
  12  -3   5    2.71    3.07
  12   3  -5    8.96    3.10
  13  -3  -5    1.15    2.98
  13   3   5    2.76    2.60
  13  -3   5    1.94    2.98
  13   3  -5    3.01    2.90
  14  -3  -5   28.43    5.94
  14   3   5   24.34    4.52
  14  -3   5   35.17    5.55
  14   3  -5   38.20    5.64
  15   3   5    0.37    2.80
  15  -3  -5   -2.68    3.12
  15   3  -5    7.54    3.66
  15  -3   5    1.27    3.60
  16  -3  -5   16.26    5.03
  16   3   5   13.56    3.98
  16  -3   5   21.48    5.09
  16   3  -5   25.61    5.03
  17   3   5   -4.20    3.45
  17  -3  -5    4.71    4.55
  17  -3   5    7.30    4.29
  17   3  -5    8.47    3.88
  18   3   5    2.80    4.20
  18  -3  -5   -3.43    4.52
  18   3  -5    1.81    3.97
  18  -3   5    3.65    4.71
   0   3   6   -0.14    0.76
   0  -3  -6    1.19    0.82
   0   3  -6   -0.18    0.82
  -1   3  -6    7.38    1.68
   1   3   6    4.44    1.11
  -1  -3   6    8.67    1.86
   1  -3   6    6.87    1.71
  -1  -3  -6    3.91    1.11
   1   3  -6    7.09    1.65
  -1   3   6    5.33    1.33
  -2  -3   6  303.18   19.67
   2  -3  -6  313.35   19.65
   2   3   6  309.29   19.26
  -2  -3  -6  309.17   19.20
   2   3  -6  308.05   19.76
   2  -3   6  304.01   19.71
  -2   3   6  325.67   19.55
   3  -3  -6  510.45   30.95
   3   3   6  507.75   30.41
  -3  -3   6  477.37   30.83
  -3   3   6  526.09   30.84
   3   3  -6  494.27   31.01
   3  -3   6  466.10   30.84
   4   3   6   20.49    2.28
  -4  -3   6   24.64    3.09
   4  -3  -6   14.90    2.70
   4  -3   6   22.20    3.02
  -4   3   6   25.33    2.93
   4   3  -6   21.85    3.10
   5  -3  -6    4.52    1.77
   5   3   6    3.21    1.25
   5   3  -6    4.48    1.78
   6  -3  -6   48.04    4.68
   6   3   6   45.87    4.13
   6   3  -6   43.62    4.55
   7   3   6  130.14    9.38
   7  -3  -6  148.87   10.28
   7   3  -6  135.43   10.00
   7  -3   6  129.40   10.09
   8   3   6   16.13    2.76
   8  -3  -6   16.48    3.36
   8  -3   6   16.12    3.44
   8   3  -6   16.10    2.97
   9  -3  -6  154.15   11.33
   9   3   6  147.31   10.40
   9   3  -6  133.92   11.45
  10  -3  -6    6.25    2.66
  10   3   6   11.73    2.69
  10   3  -6    6.55    2.60
  10  -3   6    2.81    2.63
  11  -3  -6   -0.04    2.39
  11   3   6    4.09    2.60
  11  -3   6    1.87    2.89
  11   3  -6   -2.34    2.09
  12   3   6   10.47    3.89
  12  -3  -6    3.72    3.27
  12   3  -6    8.24    3.07
  12  -3   6    6.60    3.93
  13  -3  -6   18.63    4.29
  13   3   6    6.98    3.08
  13   3  -6   14.28    3.91
  13  -3   6   10.33    3.87
  14   3   6   10.69    3.52
  14  -3  -6    7.73    3.99
  14  -3   6    8.89    4.32
  14   3  -6   11.28    3.60
  15  -3  -6    0.76    3.28
  15   3   6    4.18    3.17
  15  -3   6    6.78    3.97
  15   3  -6    4.94    3.68
  16  -3  -6   45.55    7.05
  16   3   6   44.77    6.14
  16  -3   6   40.85    6.94
  16   3  -6   42.65    6.74
  17   3   6    6.48    3.54
  17  -3  -6    5.02    4.36
  17  -3   6    9.11    4.51
  17   3  -6    7.27    4.65
  18   3   6    1.10    4.10
  18  -3  -6    4.81    5.70
  18   3  -6    1.82    4.13
  18  -3   6   -2.23    4.59
   0  -3  -7    0.89    1.05
   0   3  -7   -0.63    1.15
   0   3   7   -0.59    0.97
   0  -3   7    0.82    1.30
   1  -3  -7  159.58   10.72
   1   3   7  161.68   10.50
  -1  -3   7  166.76   10.97
  -1   3  -7  165.39   10.83
   1   3  -7  166.23   10.94
  -1   3   7  159.63   10.58
  -1  -3  -7  140.50   10.66
   1  -3   7  158.87   10.91
   2  -3  -7   30.23    3.32
  -2   3  -7   28.46    3.18
   2   3   7   28.32    2.79
  -2  -3   7   31.58    3.32
  -2   3   7   26.79    3.00
  -2  -3  -7   25.39    2.74
   2   3  -7   33.31    3.53
   2  -3   7   26.65    3.17
   3  -3  -7    2.08    1.56
   3   3   7    1.85    1.15
  -3  -3   7    1.24    1.21
   3   3  -7    0.26    1.22
   3  -3   7   -0.04    1.21
  -3   3   7    1.10    1.20
   4  -3  -7    7.79    2.17
   4   3   7    8.16    1.69
   4   3  -7    9.48    2.19
   5  -3  -7  117.26    8.28
   5   3   7   99.85    7.36
   5   3  -7  103.88    8.06
   6  -3  -7    1.88    1.75
   6   3  -7   -0.39    1.12
   7   3   7   -0.30    1.48
   7   3   7   -0.69    1.21
   7  -3  -7   -1.35    1.40
   7   3  -7    2.32    1.87
   8   3   7    5.04    2.00
   8  -3  -7    2.17    2.01
   8  -3   7    9.50    2.82
   8   3  -7    2.13    1.89
   9  -3  -7    2.50    2.43
   9   3   7    4.47    2.19
   9   3  -7    3.03    2.35
   9  -3   7    3.26    2.58
  10  -3  -7    0.71    2.59
  10   3   7    4.37    2.36
  10  -3   7    2.77    3.08
  10   3  -7    6.73    2.56
  11  -3  -7   28.22    5.05
  11   3   7   41.60    5.03
  11   3  -7   30.72    5.19
  11  -3   7   45.93    6.06
  12   3   7   65.46    6.37
  12  -3  -7   53.14    6.76
  12  -3   7   68.04    7.42
  12   3  -7   62.21    6.90
  13  -3  -7   35.87    5.63
  13   3   7   40.71    5.32
  13  -3   7   36.73    5.77
  13   3  -7   33.10    5.62
  14  -3  -7   -2.23    2.70
  14   3   7   -4.17    2.59
  14  -3   7    1.92    3.57
  14   3  -7   -2.31    2.79
  15   3   7    9.29    3.27
  15  -3  -7    6.11    4.06
  15  -3   7    6.44    4.10
  15   3  -7   14.82    4.37
  16   3   7   31.18    5.19
  16  -3  -7   34.46    6.37
  16   3  -7   32.94    6.31
  16  -3   7   22.97    5.84
  17  -3  -7   21.51    5.82
  17   3   7   15.11    4.41
  17   3  -7   18.16    5.17
  17  -3   7   27.33    6.04
  18   3   7   -2.52    3.92
  18  -3  -7    1.95    4.95
  18  -3   7    4.18    4.85
  18   3  -7    5.70    5.02
   0  -3   8   -0.48    1.25
   0   3  -8    1.84    1.36
   0  -3  -8   -1.08    1.15
  -1   3  -8   41.10    3.85
   1   3   8   38.29    3.49
   1  -3  -8   32.93    3.65
   1  -3   8   35.96    4.10
  -1  -3  -8   36.50    3.50
  -1   3   8   43.00    3.70
   1   3  -8   37.10    3.90
   2   3   8    7.75    1.80
  -2   3  -8   10.58    2.28
   2  -3  -8    9.61    2.13
  -2   3   8    9.96    2.02
  -2  -3  -8    9.48    1.82
   2   3  -8    9.18    2.19
   3   3   8    6.96    1.55
   3  -3  -8    5.14    1.98
   3   3  -8    5.09    1.93
  -3  -3  -8    5.19    1.46
   4   3   8   36.60    3.31
   4  -3  -8   33.79    3.91
   4   3  -8   36.16    3.92
   5  -3  -8  224.83   14.52
   5   3   8  199.47   14.02
   5   3  -8  205.99   14.43
   6  -3  -8   12.84    2.92
   6   3   8   12.88    2.31
   6   3  -8   21.16    3.41
   7   3   8   14.57    2.45
   7  -3  -8   16.60    3.43
   7   3   8   17.53    2.91
   7   3  -8    9.12    2.72
   8   3   8    2.49    1.90
   8  -3  -8   -1.04    1.76
   8   3  -8   -0.97    1.80
   9  -3  -8   18.52    3.81
   9   3   8   17.86    3.43
   9  -3   8   23.97    4.48
   9   3  -8   13.32    3.43
  10   3   8    9.62    2.98
  10  -3  -8    5.93    2.89
  10   3  -8   12.84    3.61
  10  -3   8    6.87    3.30
  11  -3  -8   66.06    7.34
  11   3   8   67.66    6.67
  11  -3   8   66.94    7.40
  11   3  -8   74.54    7.38
  12   3   8   65.72    6.52
  12  -3  -8   57.18    6.84
  12  -3   8   60.71    7.20
  12   3  -8   57.71    6.81
  13   3   8   18.09    4.07
  13  -3  -8   14.86    5.65
  13   3  -8   22.19    4.62
  13  -3   8   11.32    4.13
  14   3   8   20.65    4.44
  14  -3  -8   19.71    4.55
  14   3  -8   15.03    4.73
  14  -3   8   20.50    5.19
  15   3   8    8.42    3.71
  15  -3  -8   10.82    4.56
  15   3  -8    7.45    3.54
  15  -3   8   10.06    4.48
  16   3   8   15.85    4.29
  16  -3  -8   21.12    5.86
  16   3  -8   23.75    5.51
  16  -3   8   18.39    5.20
  17   3   8   -3.35    3.57
  17  -3  -8    6.71    4.38
  17  -3   8   -3.33    4.17
  17   3  -8    5.21    4.19
  18  -3  -8   -0.10    4.87
  18   3   8    0.40    4.19
  18  -3   8    5.57    5.25
   0   3  -9   -0.60    1.17
   0   3   9   -0.78    1.08
   0  -3  -9    0.99    1.25
   1  -3  -9    2.91    1.60
   1   3   9    3.79    1.33
  -1   3  -9    1.92    1.54
   1   3  -9    1.67    1.48
  -1  -3  -9    3.66    1.49
  -1   3   9    1.93    1.26
   2   3   9  270.99   18.22
  -2   3  -9  289.13   18.61
   2  -3  -9  278.97   18.59
  -2  -3  -9  296.20   18.25
   2   3  -9  291.61   18.84
   3  -3  -9   28.06    3.76
   3   3   9   31.00    3.21
   3   3  -9   33.31    3.89
  -3  -3  -9   29.64    3.13
   4   3   9   19.28    2.68
   4  -3  -9   15.32    3.00
   4   3  -9   13.45    2.66
   5   3   9   26.39    2.98
   5  -3  -9   22.54    3.64
   5   3  -9   26.69    3.99
   6  -3  -9  115.41    9.12
   6   3   9  115.73    8.41
   6   3  -9  114.04    9.13
   7  -3  -9    6.18    2.54
   7   3  -9    8.35    2.82
   8   3   9   82.80    6.46
   8  -3  -9   67.02    6.97
   8   3  -9   65.18    6.96
   9  -3  -9   21.52    4.44
   9   3   9    9.69    2.85
   9   3  -9   21.04    4.19
   9  -3   9   14.51    3.72
  10  -3  -9    6.53    2.93
  10   3   9   15.39    3.37
  10   3  -9   11.76    3.50
  10  -3   9   14.92    3.86
  11  -3  -9   10.10    4.00
  11  -3   9    7.28    3.61
  11   3  -9   16.80    3.99
  12   3   9   -3.04    2.39
  12  -3  -9   -1.85    2.44
  12  -3   9    5.87    3.64
  12   3  -9   11.14    3.65
  13  -3  -9   35.01    6.28
  13   3   9   32.43    4.91
  13   3  -9   42.38    6.35
  13  -3   9   34.10    6.10
  14  -3  -9    1.49    3.59
  14   3   9    8.12    3.22
  14  -3   9   11.76    7.29
  14   3  -9    4.91    3.66
  15  -3  -9   -0.99    3.94
  15   3   9   -0.31    3.28
  15   3  -9   -2.39    3.30
  15  -3   9    4.69    4.17
  16  -3  -9    1.30    4.69
  16   3   9   -0.74    3.26
  16  -3   9   -0.86    4.39
  16   3  -9    6.96    3.71
  17   3   9   -1.51    4.05
  17   3  -9   12.69    5.02
  17  -3   9   -3.93    4.85
   0   3 -10   -0.83    1.18
   0  -3 -10    0.45    1.34
   0   3  10   -0.83    1.17
   1   3  10   14.14    2.41
   1  -3 -10   12.88    2.50
  -1   3 -10   17.79    2.98
   1   3 -10   13.87    2.84
  -1  -3 -10   15.08    2.36
   2  -3 -10  330.29   21.24
   2   3  10  331.95   20.91
  -2   3 -10  319.21   21.12
   2   3 -10  311.55   21.32
  -2  -3 -10  336.72   20.85
   3   3  10   15.95    2.59
   3  -3 -10   15.28    3.04
  -3  -3 -10   15.99    2.43
   3   3 -10   13.71    2.86
   4   3  10   19.16    2.85
   4  -3 -10   17.40    3.33
   4   3 -10   18.88    3.28
   5  -3 -10    5.23    2.27
   5   3  10    1.12    1.69
   5   3 -10    6.29    2.21
   6  -3 -10  193.64   14.18
   6   3 -10  178.25   13.48
   7  -3 -10   49.80    5.72
   7   3 -10   45.37    5.49
   8   3  10   26.53    4.05
   8  -3 -10   24.50    4.50
   8   3 -10   20.04    4.21
   9   3  10   45.42    5.58
   9  -3 -10   55.65    6.29
   9   3 -10   45.83    6.67
   9  -3  10   45.01    6.42
  10   3  10   59.32    6.38
  10  -3 -10   74.07    7.60
  10  -3  10   54.13    6.91
  10   3 -10   66.50    7.06
  11  -3 -10   44.01    6.58
  11   3  10   51.22    6.08
  11   3 -10   50.16    6.92
  11  -3  10   55.57    7.19
  12   3  10   26.79    4.43
  12  -3 -10   28.00    5.68
  12   3 -10   32.60    5.58
  12  -3  10   22.98    5.34
  13  -3 -10   25.03    5.60
  13   3  10   34.09    5.18
  13  -3  10   22.93    5.40
  13   3 -10   28.87    5.79
  14  -3 -10    9.94    4.09
  14   3  10   16.41    3.93
  14  -3  10    9.49    4.89
  14   3 -10   14.11    4.77
  15  -3 -10    6.64    4.35
  15   3  10    9.26    3.83
  15   3 -10    1.73    3.55
  15  -3  10    1.42    3.78
  16  -3 -10   22.59    5.94
  16   3  10   22.70    6.78
  16  -3  10   25.38    6.34
  16   3 -10   24.01    6.19
  17   3  10   21.48    5.17
  17  -3 -10   18.08    6.25
  17   3 -10   21.05    7.35
  17  -3  10   20.92    6.27
   0   3 -11   -0.74    1.26
   0  -3 -11    0.15    1.38
   1  -3 -11   35.77    3.95
  -1   3 -11   31.91    3.74
   1   3 -11   27.99    3.99
  -1  -3 -11   23.94    3.51
  -2   3 -11   40.11    4.47
   2  -3 -11   44.86    4.64
   2   3 -11   38.72    4.56
  -2  -3 -11   50.69    4.39
   3  -3 -11   42.73    4.60
  -3  -3 -11   41.48    3.93
   3   3 -11   35.05    4.41
   4  -3 -11   71.50    6.67
   5  -3 -11    9.08    4.85
   5   3 -11    8.52    3.16
   6  -3 -11    2.37    2.39
   6   3 -11    0.73    1.93
   7  -3 -11    5.34    2.71
   7   3 -11    1.98    2.13
   8  -3 -11   12.39    3.31
   8   3 -11   13.19    3.60
   9   3  11   44.42    5.20
   9  -3 -11   39.01    5.99
   9   3 -11   31.65    5.54
  10  -3 -11   48.55    7.18
  10   3 -11   48.65    6.82
  10  -3  11   63.20    7.05
  11  -3 -11   25.26    5.29
  11   3  11   29.76    4.72
  11   3 -11   26.15    5.09
  11  -3  11   25.25    4.95
  12   3  11   21.62    4.43
  12  -3 -11   19.72    4.72
  12  -3  11   19.00    4.80
  13   3  11   -2.60    2.83
  13  -3 -11   -3.20    3.26
  13   3 -11    3.53    3.66
  14  -3 -11   16.12    4.83
  14   3  11    5.39    3.44
  14  -3  11   18.43    5.12
  14   3 -11    9.96    4.35
  15  -3 -11   16.92    5.44
  15   3  11   19.78    4.62
  15  -3  11   20.68    5.58
  15   3 -11   28.91    6.08
  16   3  11   29.97    5.95
  16  -3 -11   17.58    6.21
  16  -3  11   38.03    7.44
  16   3 -11   36.16    6.35
  17   3  11    4.42    4.66
  17  -3 -11    5.22    4.96
  17  -3  11   -3.35    5.29
  17   3 -11   16.41    5.77
   0   3 -12    1.05    1.60
   0  -3 -12    1.25    1.49
  -1   3 -12  414.18   26.27
   1  -3 -12  428.50   26.28
   1   3 -12  356.50   27.50
  -1  -3 -12  409.64   25.96
  -2   3 -12  122.18    9.53
   2  -3 -12  130.93    9.82
  -2  -3 -12  125.73    9.18
   2   3 -12  119.10   10.36
   3  -3 -12   16.17    3.24
  -3  -3 -12   20.42    3.17
   3   3 -12   23.84    3.87
   4  -3 -12   76.59    8.04
   4   3 -12   83.01    7.56
   5  -3 -12    5.79    2.90
   5   3 -12    7.77    2.98
   6  -3 -12   23.47    4.49
   6   3 -12   35.87    5.40
   7  -3 -12   40.32    6.11
   7   3 -12   47.18    6.33
   8  -3 -12    3.52    2.79
   8   3 -12   -2.56    1.81
   9   3  12   76.40    7.84
   9  -3 -12   82.83    8.15
   9   3 -12   68.11    7.76
  10   3  12    1.62    2.55
  10  -3 -12    0.11    2.91
  10  -3  12   -3.59    2.90
  10   3 -12    6.08    3.54
  11   3  12    5.09    2.85
  11   3 -12    6.01    3.41
  11  -3  12    2.75    3.76
  12  -3 -12    1.69    3.71
  12   3  12    0.25    2.87
  12   3 -12    5.61    3.19
  12  -3  12    1.40    3.52
  13  -3 -12   21.61    5.36
  13   3  12   12.45    3.83
  13   3 -12   12.43    4.31
  13  -3  12   12.99    4.39
  14   3  12   34.64    5.58
  14  -3 -12   29.48    6.65
  14   3 -12   37.30    6.55
  14  -3  12   25.79    5.94
  15  -3 -12    5.60    4.63
  15   3  12    1.55    3.97
  15  -3  12   -3.73    4.20
  15   3 -12    2.32    4.03
  16   3  12    3.59    4.36
  16  -3 -12    4.96    4.64
  16   3 -12    0.33    4.89
  16  -3  12    2.14    4.95
   0   3 -13   -1.96    1.45
   0  -3 -13    0.57    1.82
  -1   3 -13  400.99   25.70
   1  -3 -13  392.02   25.67
   1   3 -13  384.17   25.77
  -1  -3 -13  391.93   25.39
   2  -3 -13    9.11    2.97
  -2   3 -13   17.83    3.25
  -2  -3 -13   11.68    2.75
   2   3 -13    8.87    2.95
   3  -3 -13   44.67    5.30
   3   3 -13   43.64    5.72
  -3  -3 -13   38.92    4.60
   4  -3 -13   37.34    5.39
   4   3 -13   38.71    5.32
   5  -3 -13   17.12    3.85
   5   3 -13   11.78    3.27
   6  -3 -13   27.75    5.03
   6   3 -13   23.82    4.47
   7  -3 -13   67.24    7.39
   7   3 -13   65.97    7.10
   8  -3 -13   80.10    8.22
   8   3 -13   73.81    7.98
   9  -3 -13   80.50    8.81
   9   3 -13   92.11    8.72
  10  -3 -13   45.56    6.81
  10   3  13   41.51    5.63
  10   3 -13   36.47    6.52
  11  -3 -13    2.35    3.72
  11   3  13    4.15    3.38
  11  -3  13   -0.28    3.40
  11   3 -13   -1.30    3.44
  12   3  13   12.53    4.06
  12  -3 -13   11.53    4.39
  12   3 -13    1.72    3.51
  13  -3 -13    7.28    4.06
  13   3  13    0.96    3.18
  13  -3  13    3.95    3.99
  13   3 -13    0.20    3.22
  14  -3 -13   32.05    6.80
  14   3  13   27.18    5.41
  14  -3  13   48.26    7.15
  14   3 -13   23.84    6.01
  15  -3 -13    5.43    5.32
  15  -3  13   15.82    6.04
  15   3 -13    3.60    4.69
  16   3  13    5.59    4.52
  16  -3 -13    8.09    5.36
  16  -3  13    2.65    5.19
  16   3 -13   -2.67    4.19
   0   3 -14    3.48    2.27
   0  -3 -14   -1.33    2.13
   1  -3 -14  313.13   21.41
  -1   3 -14  288.14   21.08
   1   3 -14  311.28   21.50
  -1  -3 -14  352.51   21.29
  -2   3 -14    1.73    2.17
   2  -3 -14    1.94    2.31
   2   3 -14   -0.94    2.08
  -2  -3 -14    0.85    2.13
   3  -3 -14    1.33    2.73
  -3  -3 -14    2.20    2.14
   3   3 -14    3.53    2.20
   4  -3 -14  134.28   11.10
   4   3 -14  139.33   11.29
   5  -3 -14   30.93    4.91
   5   3 -14   23.26    4.39
   6  -3 -14   72.26    7.61
   6   3 -14   75.40    7.77
   7  -3 -14   43.95    6.47
   7   3 -14   37.30    6.11
   8  -3 -14   25.91    5.14
   8   3 -14   19.64    4.42
   9  -3 -14  123.85   10.75
   9   3 -14   95.26    9.87
  10  -3 -14   40.83    6.92
  10   3  14   48.09    6.47
  10   3 -14   32.45    6.03
  11   3  14   16.72    4.25
  11  -3 -14   31.16    6.16
  11   3 -14   28.11    5.49
  11  -3  14   21.96    6.00
  12  -3 -14   -1.45    3.43
  12   3  14    3.85    3.55
  12   3 -14    3.58    3.76
  12  -3  14    2.05    3.96
  13   3  14    4.70    3.68
  13  -3 -14    8.50    4.78
  13  -3  14    5.05    3.77
  13   3 -14    8.69    4.26
  14  -3 -14    1.64    4.20
  14   3  14   -3.70    4.12
  14   3 -14   -5.46    4.07
  14  -3  14    6.51    4.58
  15  -3 -14   18.32    5.82
  15   3  14   14.90    4.77
  15  -3  14    5.33    5.30
   0   3 -15   -0.97    1.97
   0  -3 -15    2.04    2.14
   1  -3 -15   67.62    7.22
  -1   3 -15   89.10    7.61
   1   3 -15   91.22    7.97
  -1  -3 -15   73.47    7.16
  -2   3 -15   58.42    6.14
   2  -3 -15   55.15    6.49
  -2  -3 -15   58.62    6.06
   2   3 -15   63.51    6.68
   3  -3 -15   19.59    4.25
  -3  -3 -15   18.04    3.49
   3   3 -15   18.89    4.19
   4  -3 -15   75.13    8.08
   4   3 -15   96.76    8.49
   5  -3 -15    6.12    3.29
   5   3 -15   11.91    3.53
   6  -3 -15   32.42    5.45
   6   3 -15   34.30    5.87
   7  -3 -15   12.08    3.69
   7   3 -15    8.97    3.52
   8  -3 -15    2.18    3.31
   8   3 -15   -0.25    2.63
   9  -3 -15   56.82    8.15
   9   3 -15   40.52    6.69
  10  -3 -15    3.41    3.76
  10   3  15    3.30    3.38
  10   3 -15    2.06    3.38
  11   3  15    4.46    3.44
  11  -3 -15    0.72    3.99
  11  -3  15    5.96    3.97
  11   3 -15    1.08    3.44
  12  -3 -15   48.98    7.67
  12   3  15   44.92    6.45
  12   3 -15   23.41    6.06
  12  -3  15   22.95    5.75
  13   3  15    7.07    4.15
  13  -3 -15   15.30    6.00
  13   3 -15   13.97    5.22
  13  -3  15   24.83    5.74
  14   3  15   22.46    6.67
  14  -3  15   30.60    6.64
  14   3 -15   29.07    7.45
  15  -3 -15    0.46    4.76
  15   3  15   -5.34    4.36
  15  -3  15   11.66    5.53
  15   3 -15   -6.52    4.97
   0   3 -16    2.65    2.56
   0  -3 -16    0.04    2.34
  -1   3 -16    8.25    2.86
   1  -3 -16   10.28    3.24
   1   3 -16   12.13    3.44
  -1  -3 -16   13.12    3.40
  -2   3 -16   47.27    5.68
   2  -3 -16   53.81    6.07
   2   3 -16   37.32    5.74
  -2  -3 -16   47.47    5.49
   3  -3 -16  133.79   11.10
   3   3 -16  120.81   10.76
  -3  -3 -16  134.63   10.39
   4  -3 -16    8.37    3.42
   4   3 -16   11.94    3.57
   5  -3 -16   35.78    5.81
   5   3 -16   25.13    4.93
   6  -3 -16   -0.13    3.07
   6   3 -16   -0.43    2.53
   7  -3 -16    2.92    2.98
   7   3 -16    2.53    5.06
   8  -3 -16    5.96    3.53
   8   3 -16    0.22    2.70
   9  -3 -16   27.82    5.63
   9   3 -16   20.98    4.95
  10   3  16   14.08    4.15
  10  -3 -16   -3.91    3.34
  10   3 -16    3.55    3.62
  11   3  16   15.52    4.72
  11  -3 -16   22.43    5.89
  11   3 -16   16.35    5.52
  11  -3  16   24.18    5.94
  12  -3 -16  124.66   12.21
  12   3  16  132.00   10.98
  12  -3  16   92.09   11.55
  12   3 -16  134.75   12.98
  13  -3 -16   12.97    5.80
  13   3 -16    4.14    4.80
  13  -3  16    9.34    5.13
  14  -3 -16    7.19    5.70
  14   3  16    0.60    4.79
  14   3 -16    2.82    4.83
  14  -3  16   -1.22    5.15
   0   3 -17    1.64    2.48
   0  -3 -17    3.19    2.68
  -1   3 -17    5.26    3.08
   1  -3 -17    0.56    2.56
  -1  -3 -17    5.79    2.72
   1   3 -17    6.77    2.97
  -2   3 -17   59.53    6.63
   2  -3 -17   62.60    6.71
   2   3 -17   62.73    6.98
  -2  -3 -17   47.97    6.01
   3  -3 -17   16.04    4.39
  -3  -3 -17   27.77    4.64
   3   3 -17   19.21    4.53
   4  -3 -17   64.92    7.53
   4   3 -17   64.62    7.39
   5  -3 -17   -1.07    2.99
   5   3 -17    6.91    3.18
   6  -3 -17    4.47    3.55
   6   3 -17    5.57    3.70
   7  -3 -17    1.04    2.86
   7   3 -17    4.83    3.38
   8  -3 -17    7.92    4.21
   8   3 -17   17.55    4.96
   9  -3 -17    3.24    3.39
   9   3 -17   -0.08    3.33
  10  -3 -17    2.62    3.89
  10   3 -17    2.76    3.72
  11  -3 -17   13.12    5.20
  11   3  17    6.37    4.51
  11  -3  17    8.76    4.75
  11   3 -17    3.92    4.30
  12   3  17  100.25   10.93
  12  -3 -17   94.03   11.25
  12  -3  17   89.70   10.79
  13   3  17    6.49    4.55
  13  -3 -17    7.01    5.30
  13  -3  17   -2.93    4.65
  13   3 -17    5.22    4.85
   0  -3 -18    4.62    2.85
   0   3 -18    1.87    2.71
  -1   3 -18    5.51    2.95
   1  -3 -18   -4.33    2.79
   1   3 -18    4.54    3.24
  -1  -3 -18   -0.52    2.40
   2  -3 -18   -3.38    2.09
  -2   3 -18    2.84    2.95
  -2  -3 -18    0.56    2.30
   2   3 -18    4.18    2.75
   3  -3 -18    4.26    2.88
  -3  -3 -18    5.65    2.97
   3   3 -18   -5.17    3.22
   4  -3 -18   98.79    9.77
   4   3 -18  103.63   10.23
   5  -3 -18    3.73    4.57
   5   3 -18    0.19    2.83
   6  -3 -18   13.32    4.49
   6   3 -18   16.14    4.34
   7  -3 -18   18.96    5.10
   7   3 -18   15.06    4.73
   8  -3 -18    0.34    3.63
   8   3 -18    5.46    3.43
   9  -3 -18    4.61    3.90
   9   3 -18    4.47    3.65
  10  -3 -18    7.06    4.66
  10   3 -18   17.10    5.02
  11  -3 -18   -6.05    3.94
  11   3 -18    9.06    4.99
  12  -3 -18   18.13    5.82
  12   3  18   16.22    5.33
  12   3 -18   25.49    6.23
  12  -3  18   16.20    6.11
   0  -3 -19    2.50    2.87
   0   3 -19    0.68    2.73
   1  -3 -19   48.77    6.80
   1   3 -19   45.65    6.68
  -1  -3 -19   51.14    6.76
  -2   3 -19   21.52    6.00
   2  -3 -19   35.79    5.52
  -2  -3 -19   32.23    5.13
   2   3 -19   33.98    5.89
   3  -3 -19   11.52    4.16
   3   3 -19    6.34    3.37
  -3  -3 -19    9.43    3.35
   4  -3 -19   37.80    6.58
   4   3 -19   33.06    6.30
   5  -3 -19    0.91    3.38
   5   3 -19    0.03    3.10
   6  -3 -19    4.64    4.00
   6   3 -19   15.39    4.64
   7  -3 -19    2.84    3.90
   7   3 -19   -0.83    3.53
   8  -3 -19    3.97    4.74
   8   3 -19    7.13    4.53
   9  -3 -19   33.75    6.94
   9   3 -19   41.30    7.33
  10  -3 -19    8.61    4.87
  10   3 -19    0.94    4.71
  11  -3 -19   -4.16    4.73
  11   3  19    9.02    4.86
  11   3 -19   10.11    5.21
   0   3 -20    3.86    3.11
   0  -3 -20   -2.99    2.81
   1  -3 -20   97.32   11.54
  -1   3 -20   79.62    8.77
  -1  -3 -20   76.40    8.36
   1   3 -20   84.12    8.88
  -2   3 -20  158.80   13.18
   2  -3 -20  177.42   13.78
   2   3 -20  148.08   13.17
  -2  -3 -20  151.32   12.70
   3  -3 -20   10.27    4.02
   3   3 -20   10.08    4.14
   4  -3 -20   35.03    6.13
   4   3 -20   44.82    7.25
   5  -3 -20   -2.46    3.47
   5   3 -20    6.12    3.64
   6  -3 -20    7.97    4.66
   6   3 -20    1.74    4.18
   7  -3 -20   -1.14    3.74
   7   3 -20    4.29    3.97
   8  -3 -20   31.81    7.27
   8   3 -20   26.77    6.51
   9  -3 -20   64.68    9.58
   9   3 -20   53.69    9.87
  10  -3 -20   -9.52    4.26
  10   3 -20   -0.35    4.59
   0  -3 -21    0.86    3.28
   0   3 -21    5.06    3.52
   1  -3 -21   23.39    5.54
  -1   3 -21   21.58    4.88
  -1  -3 -21   33.16    5.59
   1   3 -21   29.21    5.64
   2  -3 -21  109.94   10.12
  -2  -3 -21   83.20    9.69
   2   3 -21   94.09    9.89
   3  -3 -21   22.05    5.49
   3   3 -21   10.64    4.71
   4  -3 -21   13.16    4.63
   4   3 -21   25.42    5.85
   5  -3 -21    1.20    3.61
   5   3 -21   -1.45    3.84
   6  -3 -21   12.67    4.95
   6   3 -21   16.11    5.06
   7  -3 -21   -1.87    3.85
   7   3 -21    6.62    4.70
   8  -3 -21    3.30    5.45
   8   3 -21    4.83    7.61
   9  -3 -21   54.90    9.27
   9   3 -21   60.84    9.40
   0   3 -22    1.14    3.16
   0  -3 -22   -0.28    3.70
  -1   3 -22    4.54    3.97
   1  -3 -22    2.45    4.03
  -1  -3 -22    7.14    4.12
   1   3 -22    2.41    3.96
   2  -3 -22   45.63    7.21
  -2  -3 -22   52.00    7.40
   2   3 -22   55.78    8.30
   3  -3 -22   18.12    5.52
   3   3 -22   19.83    5.38
   4  -3 -22    4.03    4.65
   4   3 -22    1.15    3.86
   5  -3 -22   -6.29    3.77
   5   3 -22    4.08    4.78
   6  -3 -22    6.79    4.96
   7   3 -22    0.08    4.52
   8  -3 -22   13.78    5.96
   8   3 -22    4.93    5.56
   0   3 -23   -4.72    3.57
   0  -3 -23    6.21    4.13
   1  -3 -23   10.32    4.91
  -1   3 -23    7.44    4.07
   1   3 -23   -0.26    4.42
  -1  -3 -23    8.46    4.16
   2  -3 -23   99.48   11.30
  -2  -3 -23  101.14   10.51
   2   3 -23  106.84   11.18
   3  -3 -23    2.17    4.38
   3   3 -23    5.33    6.65
   4  -3 -23   21.56    6.62
   4   3 -23   14.87    6.73
   5  -3 -23   -6.32    4.89
   5   3 -23    3.06    4.85
   6  -3 -23   22.87    6.18
   6   3 -23   35.87    7.63
   0  -3 -24    0.00    4.74
   0   3 -24    1.65    4.58
   1  -3 -24    1.75    4.91
  -1  -3 -24   -4.41    4.66
   1   3 -24    2.90    4.47
   2  -3 -24   16.47    6.46
   2   3 -24   13.49    5.17
   3   3 -24   19.95    5.81
   1  -4   0    5.11    1.29
  -1  -4   0    5.08    0.71
   2  -4   0   18.80    2.13
  -2  -4   0   13.99    1.25
   2   4   0   14.34    1.26
   3   4   0   -0.10    0.47
  -3   4   0    0.12    0.92
   3  -4   0    0.09    1.05
  -3  -4   0    2.41    0.63
  -4   4   0  386.80   24.34
   4  -4   0  396.96   24.38
   4   4   0  379.38   23.80
  -4  -4   0  397.04   23.80
  -5   4   0    5.48    1.95
  -5  -4   0    7.80    1.66
   5   4   0    5.28    1.44
   5  -4   0    6.42    2.17
  -6  -4   0  225.95   14.67
   6  -4   0  229.17   15.29
   6   4   0  224.33   14.97
  -6   4   0  245.15   16.63
   7   4   0    0.66    1.37
   7  -4   0    0.61    2.00
  -8  -4   0  262.33   17.04
   8   4   0  254.89   16.93
   8  -4   0  272.45   17.71
   9   4   0    1.71    1.61
   9  -4   0    5.77    2.50
  10   4   0  258.32   17.30
  10  -4   0  264.56   17.98
  11   4   0    2.87    2.15
  11  -4   0    0.18    2.79
  12   4   0   27.70    4.63
  12  -4   0   26.53    5.03
  13  -4   0    2.27    3.15
  13   4   0    1.58    2.16
  14  -4   0  184.90   14.18
  14   4   0  171.98   13.39
  15  -4   0    1.95    3.73
  15   4   0   -2.13    2.67
  16  -4   0   -3.54    3.07
  16   4   0    0.19    2.90
  17  -4   0   -1.68    3.52
  17   4   0   -0.81    2.88
  18   4   0   10.26    4.04
  18  -4   0    2.86    4.73
  19  -4   0    0.85    4.89
  19   4   0   -8.62    3.85
   0  -4  -1    1.53    0.76
   0  -4   1    2.04    0.72
  -1  -4   1  261.98   14.53
  -1   4   1  198.97   14.51
   1   4  -1  253.99   14.50
  -1  -4  -1  228.41   14.19
  -2  -4   1    1.40    0.56
   2  -4  -1    0.60    0.83
  -2   4   1    1.35    0.85
   2   4  -1    1.32    0.61
   3  -4  -1    0.59    1.04
  -3  -4   1    0.79    0.49
   3   4   1    0.85    0.39
  -3   4   1   -0.31    0.96
   3   4  -1   -0.13    0.51
  -3  -4  -1   -0.06    0.52
   4   4   1   30.56    2.38
   4  -4  -1   29.27    3.25
  -4  -4   1   30.12    2.59
   4   4  -1   35.11    2.79
  -4  -4  -1   27.64    2.45
   4  -4   1   32.60    3.28
  -4   4   1   26.99    3.02
  -5  -4   1   58.18    4.34
   5  -4  -1   59.22    5.09
   5   4   1   56.05    4.13
   5   4  -1   62.99    4.43
  -5   4   1   51.25    4.97
  -5  -4  -1   47.94    4.19
   5  -4   1   52.64    5.03
   6   4   1   14.12    2.05
   6  -4  -1   16.08    3.00
  -6  -4   1   12.56    2.15
   6  -4   1    9.12    2.68
  -6  -4  -1   13.27    2.18
   6   4  -1   16.40    2.35
   7   4   1   83.38    5.90
  -7  -4   1   72.17    5.90
   7  -4  -1   83.02    6.73
   7  -4   1   74.17    6.59
   7   4  -1   83.59    6.06
  -7  -4  -1   74.24    5.96
  -8  -4   1   -1.00    1.55
   8   4   1    1.18    1.44
   8  -4  -1    0.95    1.69
  -8  -4  -1    0.13    1.50
   8  -4   1   -0.15    2.03
   8   4  -1   -1.75    1.08
   9   4   1    0.03    1.49
   9  -4  -1    3.69    2.16
   9   4  -1    1.24    1.67
   9  -4   1    2.74    2.47
  10  -4  -1   -2.80    2.04
  10   4   1    3.78    1.85
  10  -4   1    3.39    2.73
  10   4  -1   -0.10    1.78
  11   4   1   24.31    3.76
  11  -4  -1   19.56    4.14
  11  -4   1   22.31    4.40
  11   4  -1   20.11    3.45
  12  -4  -1   -0.09    2.95
  12   4  -1    3.60    2.51
  12  -4   1    4.47    3.48
  13  -4  -1   23.08    4.76
  13   4   1   20.91    4.01
  13  -4   1   16.51    4.40
  13   4  -1   30.74    4.51
  14   4   1    2.81    2.69
  14  -4  -1    2.37    3.17
  14  -4   1    5.51    3.70
  14   4  -1    4.93    2.71
  15   4   1    1.34    2.64
  15  -4  -1    3.20    3.44
  15  -4   1   -4.07    3.10
  15   4  -1    5.49    2.93
  16  -4  -1   -1.62    3.24
  16   4   1    0.65    2.75
  16   4  -1    2.03    3.12
  16  -4   1   -1.10    3.55
  17  -4  -1    4.33    4.63
  17   4   1    6.84    3.88
  17  -4   1    4.61    4.17
  17   4  -1    1.91    3.20
  18  -4  -1   -2.21    4.73
  18   4   1    6.09    3.44
  18   4  -1   -4.55    3.53
  18  -4   1   -2.57    4.47
  19   4   1    6.97    4.54
  19  -4  -1    2.50    4.86
  19   4  -1    3.02    4.18
  19  -4   1    0.11    4.96
   0   4   2  124.98    7.35
   0   4  -2  114.58    7.58
   0  -4  -2  119.62    7.33
   0  -4   2  107.79    7.56
   1  -4  -2  515.55   31.00
  -1  -4   2  505.44   31.08
   1   4  -2  513.12   31.07
  -1   4   2  511.49   30.99
  -2  -4   2   14.90    1.62
   2  -4  -2   17.28    1.86
  -2   4   2   18.61    1.89
   2   4  -2   15.39    1.64
  -3  -4   2 2165.81  135.12
   3   4   2 2350.82  134.69
  -3   4   2 2357.81  135.39
   3   4  -2 2149.95  135.17
   4  -4  -2  365.01   21.59
   4   4   2  352.76   20.83
  -4  -4   2  321.14   21.16
  -4   4   2  347.55   21.87
   4  -4   2  332.76   21.59
  -4  -4  -2  359.21   20.90
   4   4  -2  318.47   21.23
   5  -4  -2  371.63   23.40
  -5  -4   2  372.10   22.98
   5   4   2  357.55   22.64
   5  -4   2  391.35   23.56
   5   4  -2  370.68   23.07
  -5   4   2  349.12   23.34
  -5  -4  -2  378.59   22.76
   6  -4  -2   98.63    7.30
   6   4   2   90.39    6.39
  -6  -4  -2   88.12    6.46
   6   4  -2   92.74    6.77
   6  -4   2   93.08    7.45
   7   4   2    5.28    1.60
  -7  -4   2    6.77    1.98
   7  -4  -2    4.88    2.26
  -7  -4  -2    3.94    1.76
   7   4  -2    5.80    1.79
   7  -4   2    5.95    2.37
   8  -4  -2  481.93   30.17
   8   4   2  478.05   29.38
   8  -4   2  482.37   30.17
   8   4  -2  449.52   29.68
  -8  -4  -2  475.14   29.52
   9  -4  -2  292.94   19.76
   9   4   2  288.21   18.91
   9  -4   2  293.33   19.71
  -9  -4  -2  307.20   19.21
   9   4  -2  289.25   19.27
  10   4   2  550.12   34.13
  10  -4  -2  554.09   34.95
  10  -4   2  541.82   34.89
  10   4  -2  539.16   34.49
  11   4   2   62.95    5.77
  11  -4  -2   67.16    6.82
  11   4  -2   57.63    6.03
  11  -4   2   59.68    6.69
  12   4   2   15.61    3.37
  12  -4  -2    9.92    3.07
  12  -4   2   11.87    3.76
  12   4  -2    7.66    2.72
  13   4   2   53.65    5.85
  13  -4  -2   52.39    6.92
  13  -4   2   51.05    7.15
  13   4  -2   54.42    6.24
  14   4   2   59.99    6.60
  14  -4  -2   67.03    7.40
  14  -4   2   60.95    7.41
  14   4  -2   66.29    6.87
  15  -4  -2   47.11    6.87
  15   4   2   38.67    5.84
  15   4  -2   44.07    6.35
  15  -4   2   36.13    6.43
  16  -4  -2   42.60    6.80
  16   4   2   46.94    6.17
  16  -4   2   34.53    6.21
  16   4  -2   31.36    5.46
  17  -4  -2   70.61    9.27
  17   4  -2   60.23    7.29
  17  -4   2   52.59    8.20
  18  -4  -2    5.28    4.55
  18   4   2   -6.89    3.43
  18  -4   2    3.39    4.47
  18   4  -2    6.60    3.50
  19   4  -2    7.71    4.92
   0   4  -3   40.56    2.81
   0   4   3   28.52    2.33
   0  -4   3   36.87    2.78
   0  -4  -3   27.95    2.32
  -1  -4   3  181.91   10.47
   1   4   3  147.94    9.90
   1  -4  -3  145.99   10.16
  -1   4   3  136.93   10.11
  -1  -4  -3  168.31    9.88
   1   4  -3  191.24   10.51
   1  -4   3  167.54   10.46
  -2  -4   3   15.83    1.68
   2  -4  -3   10.91    1.70
   2   4  -3   15.06    1.69
  -2   4   3   14.88    1.86
   3   4   3    9.03    0.98
   3  -4  -3    7.48    1.54
  -3  -4   3    6.63    1.31
   3   4   3    7.03    0.85
   3   4  -3    9.79    1.58
  -3   4   3    9.84    1.67
   4  -4  -3    1.80    1.28
   4   4   3    0.24    0.82
  -4  -4   3    2.21    1.03
   4   4  -3   -1.45    0.83
  -4   4   3   -0.19    1.52
   5   4   3   84.40    6.07
  -5  -4   3   94.46    6.50
   5  -4  -3   83.55    6.83
  -5   4   3   87.93    6.90
   5   4  -3  100.47    6.70
   5  -4   3   84.94    7.10
   6  -4  -3    5.36    2.07
  -6  -4   3    0.65    1.38
   6   4   3    2.10    1.31
   6   4  -3    4.08    1.55
   6  -4   3    6.14    2.33
   7  -4  -3   21.26    3.30
   7   4   3   18.48    2.55
  -7  -4   3   16.54    2.57
   7   4  -3   17.61    2.80
   7  -4   3   17.99    3.27
   8  -4  -3    6.43    2.24
   8   4   3    8.38    1.92
   8   4  -3    9.17    2.26
   8  -4   3    3.97    2.25
   9   4   3    3.19    1.56
   9  -4   3    3.80    2.52
   9   4  -3   -0.11    1.49
  10  -4  -3    3.05    2.37
  10   4   3    5.71    2.08
  10  -4   3   -1.80    2.32
  10   4  -3   -0.95    1.78
  11  -4  -3   20.28    4.35
  11   4   3   15.20    3.17
  11   4  -3   17.81    3.70
  11  -4   3   16.23    4.12
  12   4   3   15.24    3.31
  12  -4  -3   15.22    3.91
  12   4  -3   19.12    3.64
  12  -4   3   18.24    4.34
  13   4   3    0.65    2.60
  13  -4  -3    8.05    3.35
  13   4  -3    5.11    2.55
  13  -4   3    5.42    3.49
  14  -4  -3    0.39    3.13
  14   4   3    7.78    3.24
  14  -4   3    7.76    3.97
  14   4  -3    7.12    3.32
  15   4   3    6.86    3.10
  15  -4  -3    3.71    3.27
  15  -4   3    8.13    4.04
  15   4  -3    0.74    2.84
  16  -4  -3    8.41    4.22
  16   4   3    4.06    2.83
  16  -4   3    3.17    3.47
  17  -4  -3   12.95    4.87
  17  -4   3   -0.84    4.10
  17   4  -3    1.87    3.63
  18   4   3    1.57    4.08
  18  -4  -3    1.63    4.63
  18  -4   3   -4.40    4.20
  18   4  -3    1.58    3.87
   0   4   4  751.41   46.66
   0  -4   4  804.01   47.14
   0  -4  -4  771.67   46.72
   1   4   4 3288.31  195.26
   1  -4  -4 3451.97  195.62
  -1  -4   4 3142.59  195.78
   1  -4   4 3219.26  195.82
   1   4  -4 3173.32  196.09
  -1  -4  -4 3199.38  195.28
  -1   4   4 3414.15  195.55
   2   4   4  615.12   38.27
  -2  -4   4  604.95   38.84
   2  -4  -4  643.13   38.81
  -2  -4  -4  629.26   38.25
   2  -4   4  634.74   38.97
  -2   4   4  700.87   38.82
   2   4  -4  631.67   39.26
   3  -4  -4  960.81   56.59
   3   4   4  871.45   55.88
  -3  -4   4  903.71   56.49
   3   4  -4  935.86   56.61
  -3   4   4  991.98   56.55
  -4  -4   4  320.90   21.25
   4  -4  -4  343.04   21.18
   4   4   4  345.54   20.41
   4   4  -4  314.13   21.01
  -4   4   4  341.86   21.11
   5  -4  -4   92.52    7.32
   5   4   4   91.96    6.48
  -5  -4   4   98.36    7.01
   5   4  -4   98.77    7.12
  -5   4   4   97.27    7.29
   6   4   4 1637.79   92.68
  -6  -4   4 1508.30   93.09
   6  -4  -4 1531.41   93.45
   6   4  -4 1493.95   93.28
   6  -4   4 1531.15   93.49
   7  -4  -4  529.79   33.36
   7   4   4  542.04   32.53
   7  -4   4  514.34   33.35
   7   4  -4  528.79   33.15
   8   4   4  540.22   32.03
   8  -4  -4  520.74   32.88
   8   4  -4  489.04   32.57
   8  -4   4  518.29   32.90
   9   4   4   89.52    7.13
   9  -4  -4   93.73    7.99
   9   4  -4  102.32    7.88
   9  -4   4   97.11   10.55
  10  -4  -4   28.17    4.46
  10   4   4   25.67    3.53
  10   4  -4   28.17    4.18
  10  -4   4   22.73    4.55
  11   4   4   51.30    5.33
  11  -4  -4   57.96    6.43
  11   4  -4   48.79    5.83
  11  -4   4   63.31    6.79
  12  -4  -4  327.26   22.03
  12   4   4  306.44   20.75
  12   4  -4  319.68   21.59
  12  -4   4  314.75   21.69
  13   4   4   50.66    5.55
  13  -4  -4   52.36    6.78
  13   4  -4   42.33    6.13
  13  -4   4   45.33    6.51
  14   4   4    2.13    2.63
  14  -4  -4    2.00    3.30
  14   4  -4    4.19    3.14
  14  -4   4    5.61    3.69
  15  -4  -4   85.17    9.30
  15   4   4   76.24    7.80
  15   4  -4   91.19    8.61
  15  -4   4   86.54    9.25
  16   4   4   -1.26    2.97
  16  -4  -4    6.69    4.13
  16   4  -4    2.30    3.20
  16  -4   4    4.30    4.07
  17   4   4   25.93    4.75
  17  -4  -4   27.09    6.08
  17   4  -4   17.94    4.97
  18  -4  -4   28.13    7.19
  18   4   4   20.59    5.43
  18  -4   4   38.19    7.28
  18   4  -4   18.28    5.17
   0   4   5   17.98    1.73
   0  -4  -5   17.43    1.76
   0  -4   5   14.25    2.10
   0   4  -5   13.97    2.04
   1  -4  -5  196.12   13.61
   1   4   5  213.64   13.38
  -1   4  -5  227.56   13.93
   1  -4   5  218.12   13.99
  -1   4   5  208.75   13.57
   1   4  -5  221.43   13.96
  -1  -4  -5  225.13   13.44
   2  -4  -5   92.27    7.19
  -2  -4   5  107.60    7.30
   2   4   5  110.84    6.69
   2  -4   5  100.57    7.27
  -2   4   5   89.69    6.98
  -2  -4  -5  106.68    6.65
   2   4  -5  111.21    7.41
   3  -4  -5    4.83    1.50
   3   4   5    5.00    1.01
  -3  -4   5    3.51    1.55
   3  -4   5    3.67    1.21
   3   4  -5    3.86    1.48
   4  -4  -5   14.87    2.54
   4   4   5   11.14    1.54
  -4  -4   5   10.95    1.96
  -4   4   5   11.92    2.35
   4   4  -5   12.67    2.22
  -5  -4   5   20.27    2.87
   5  -4  -5   19.01    3.02
   5   4   5   18.45    2.38
   5   4  -5   25.87    3.02
   6  -4  -5   49.37    4.95
   6   4   5   52.22    4.25
   6   4  -5   50.90    4.66
   7  -4  -5   18.78    3.20
   7   4   5   15.12    2.33
   7   4  -5   14.05    2.77
   7  -4   5   12.37    2.97
   8   4   5   27.94    3.37
   8  -4  -5   27.37    3.86
   8   4  -5   33.45    3.98
   8  -4   5   27.29    4.28
   9  -4  -5    0.62    2.12
   9   4   5   -0.92    1.52
   9  -4   5   -3.05    2.27
   9   4  -5    0.16    1.79
  10  -4  -5    6.48    3.03
  10   4   5   10.44    2.30
  10  -4   5    7.14    3.22
  10   4  -5   11.13    3.06
  11  -4  -5    3.84    2.90
  11   4   5    4.61    2.31
  11   4  -5   -0.30    2.17
  11  -4   5    2.81    2.98
  12  -4  -5    7.85    2.86
  12   4   5    2.41    2.14
  12  -4   5   -1.18    2.99
  12   4  -5    6.84    2.85
  13  -4  -5    7.20    3.46
  13   4   5    3.79    2.54
  13   4  -5    0.99    2.94
  13  -4   5    5.84    3.64
  14  -4  -5    1.47    4.75
  14   4   5   -0.32    2.35
  14  -4   5   -0.77    3.16
  14   4  -5   -0.90    2.65
  15   4   5    0.41    2.64
  15  -4  -5   -2.28    3.03
  15  -4   5   -1.85    3.60
  15   4  -5   -3.06    2.87
  16  -4  -5   -2.62    3.62
  16   4   5   -1.63    2.96
  16  -4   5   -1.67    3.49
  16   4  -5    2.42    3.40
  17  -4  -5   -1.35    4.10
  17   4   5    3.59    3.72
  17  -4   5    8.10    4.42
  17   4  -5    0.96    3.60
  18  -4  -5    5.44    7.82
  18   4   5    6.77    4.61
  18   4  -5    5.67    4.27
  18  -4   5   -2.17    4.59
   0   4  -6 5418.52  332.58
   0   4   6 5674.43  332.21
   0  -4  -6 5626.78  332.28
   0  -4   6 5524.04  332.69
   1   4   6  423.87   27.47
  -1   4  -6  472.12   28.05
  -1  -4   6  468.54   28.11
   1   4  -6  457.89   28.07
   1  -4   6  470.86   28.15
  -1  -4  -6  429.38   27.51
  -1   4   6  432.74   27.65
  -2  -4   6  938.39   57.90
   2  -4  -6  990.14   57.83
   2   4   6  914.89   57.31
  -2  -4  -6  911.05   57.26
   2  -4   6  959.25   57.99
   2   4  -6  986.01   58.04
  -2   4   6  960.14   57.68
   3   4   6  586.01   36.34
  -3  -4   6  594.46   36.97
   3  -4  -6  615.24   36.99
   3   4  -6  596.60   37.11
   3  -4   6  594.43   37.05
  -3   4   6  604.83   36.83
   4  -4  -6  504.75   30.86
   4   4   6  483.96   30.07
  -4  -4   6  470.44   30.64
  -4   4   6  505.31   30.69
   4   4  -6  497.77   30.86
   5   4   6   27.52    2.62
   5  -4  -6   29.90    3.80
   5   4  -6   28.65    3.78
   6   4   6   23.38    2.78
   6  -4  -6   28.79    3.93
   6   4   6   18.98    2.27
   6   4  -6   13.06    2.71
   7   4   6  223.92   13.64
   7  -4  -6  206.01   14.48
   7  -4   6  203.57   14.52
   7   4  -6  197.78   14.29
   8   4   6    9.35    2.33
   8   4  -6   13.54    2.91
   8  -4   6    8.18    2.88
   9   4   6   32.95    3.74
   9  -4  -6   31.18    4.96
   9   4  -6   34.49    5.54
   9  -4   6   21.57    4.42
  10  -4  -6  464.12   29.87
  10   4   6  454.03   28.69
  10   4  -6  439.18   29.58
  10  -4   6  460.74   29.69
  11  -4  -6   24.49    4.45
  11   4   6   26.69    3.93
  11   4  -6   19.26    4.05
  11  -4   6   30.33    5.06
  12  -4  -6  194.10   14.48
  12   4   6  186.51   13.24
  12   4  -6  183.45   14.01
  12  -4   6  181.72   14.20
  13   4   6   59.19    6.12
  13  -4  -6   61.55    7.15
  13  -4   6   59.93    7.62
  13   4  -6   54.05    6.48
  14   4   6   -0.64    2.75
  14  -4  -6   -5.15    3.00
  14   4  -6   -2.69    2.50
  14  -4   6   -0.98    3.59
  15   4   6    2.48    2.79
  15  -4  -6   -1.87    3.53
  15  -4   6    2.83    4.32
  15   4  -6   -2.50    3.60
  16  -4  -6    9.07    4.57
  16   4   6   15.47    4.05
  16   4  -6   20.26    4.99
  16  -4   6    9.04    4.34
  17  -4  -6    0.16    3.79
  17   4   6   -4.70    3.70
  17   4  -6   -0.77    3.49
  17  -4   6   -3.25    4.39
  18  -4  -6    6.30    5.00
  18   4   6   -3.73    3.98
  18   4  -6   -0.73    4.18
  18  -4   6    3.50    5.01
   0  -4  -7  370.93   25.33
   0   4  -7  416.46   25.47
   0   4   7  423.15   25.04
   1   4   7   49.85    4.05
   1  -4  -7   51.44    4.43
  -1  -4   7   55.07    4.61
  -1   4  -7   54.87    4.54
  -1   4   7   47.54    4.16
  -1  -4  -7   55.77    4.22
   1  -4   7   45.68    4.46
   1   4  -7   50.21    4.61
  -2  -4   7    5.43    1.66
   2  -4  -7    4.47    1.73
   2   4   7    7.97    1.47
   2  -4   7    5.69    1.87
  -2  -4  -7    6.03    1.35
  -2   4   7    4.06    1.55
   2   4  -7    2.76    1.36
   3  -4  -7    1.86    1.46
   3   4   7    0.75    0.98
   3   4  -7    0.17    1.46
  -3   4   7    1.44    1.37
   4  -4  -7   15.28    2.72
   4   4   7   14.20    2.01
   4   4  -7   13.99    2.69
   5   4   7   13.66    1.97
   5  -4  -7    9.60    2.48
   5   4  -7   12.70    2.69
   6  -4  -7   80.81    6.97
   6   4   7   88.03    6.13
   6   4   7   82.39    6.29
   6   4  -7   82.79    6.93
   7   4   7    6.76    2.04
   7  -4  -7    9.43    2.69
   7   4   7    7.42    1.73
   7   4  -7    7.10    2.32
   8   4   7   10.81    2.38
   8  -4  -7    8.51    2.93
   8   4  -7   12.72    2.81
   9   4   7    2.35    2.12
   9  -4  -7    0.14    2.40
   9   4  -7   -0.29    2.08
   9  -4   7    1.10    2.45
  10  -4  -7    4.98    2.74
  10   4   7    1.52    2.13
  10   4  -7    1.12    2.34
  10  -4   7    2.71    2.93
  11   4   7    2.31    2.43
  11  -4  -7    4.99    2.92
  11  -4   7   -0.03    2.93
  11   4  -7    1.19    2.29
  12   4   7   19.71    4.07
  12  -4  -7   29.63    4.88
  12  -4   7   25.32    4.96
  12   4  -7   26.93    4.67
  13   4   7    0.93    2.47
  13  -4  -7    5.48    3.23
  13   4  -7    4.23    2.80
  13  -4   7   -0.21    3.51
  14  -4  -7   -1.67    3.07
  14   4   7   -2.32    2.45
  14  -4   7    1.48    5.61
  14   4  -7    5.32    3.44
  15  -4  -7   -0.69    3.14
  15   4   7   -1.80    2.70
  15   4  -7    3.52    3.59
  15  -4   7    1.25    3.66
  16   4   7    3.49    3.35
  16  -4  -7   10.73    4.87
  16  -4   7   12.13    4.83
  16   4  -7   11.47    4.22
  17  -4  -7    2.08    4.09
  17   4  -7    1.00    3.88
  17  -4   7   -0.93    4.50
  18   4   7   -5.40    3.89
  18  -4  -7   -3.07    4.19
  18  -4   7   -0.06    5.00
  18   4  -7   -1.69    4.31
   0   4   8 1839.03  111.52
   0   4  -8 1892.69  111.96
   0  -4  -8 1827.02  111.58
   1  -4  -8    0.48    1.32
  -1   4  -8    2.15    1.54
   1   4   8    1.95    1.04
  -1  -4  -8    2.75    1.28
  -1   4   8    1.06    1.13
   1   4  -8    1.20    1.42
  -2   4  -8 1539.33   94.67
   2   4   8 1572.27   94.22
   2  -4  -8 1619.09   94.66
  -2  -4  -8 1586.59   94.22
   2   4  -8 1535.41   94.82
  -2   4   8 1530.64   94.44
   3  -4  -8    5.68    1.81
   3   4   8    2.37    1.28
   3   4  -8    3.25    1.81
  -3  -4  -8    5.84    1.68
   4  -4  -8  188.39   12.94
   4   4   8  179.12   12.18
   4   4  -8  195.70   13.09
   5   4   8  271.02   17.42
   5  -4  -8  287.14   18.36
   5   4  -8  264.35   18.23
   6  -4  -8   41.99    4.42
   6   4  -8   26.57    4.18
   7   4   8   31.74    3.51
   7   4   8   32.47    3.78
   7   4  -8   42.47    4.60
   8  -4  -8  184.29   13.67
   8   4   8  171.90   12.43
   8   4   8  193.28   12.63
   8   4  -8  181.88   13.50
   8  -4   8  199.39   13.77
   9  -4  -8    9.79    3.32
   9   4   8   17.81    3.35
   9   4  -8   11.27    3.37
   9  -4   8   19.76    4.18
  10   4   8  233.81   16.10
  10  -4  -8  245.64   17.55
  10  -4   8  242.12   17.14
  10   4  -8  240.86   17.25
  11  -4  -8    3.16    2.83
  11   4   8    9.40    3.10
  11  -4   8   16.72    4.29
  11   4  -8   10.80    3.68
  12  -4  -8  140.87   11.94
  12   4  -8  136.22   11.37
  12  -4   8  134.61   11.32
  13  -4  -8    7.26    3.58
  13   4   8    4.89    2.90
  13   4  -8    7.14    3.33
  13  -4   8    8.56    4.13
  14   4   8   -2.81    2.70
  14  -4  -8    1.71    3.26
  14  -4   8    6.40    4.21
  15  -4  -8    1.81    3.68
  15   4   8    2.11    2.93
  15   4  -8   -1.33    2.87
  15  -4   8   -3.36    3.77
  16  -4  -8    4.95    4.38
  16   4   8    7.04    3.77
  16   4  -8   10.19    3.99
  16  -4   8    3.22    4.41
  17  -4  -8    4.42    5.30
  17  -4   8    2.56    5.20
  17   4  -8    2.69    4.06
   0   4  -9  118.18    9.05
   0   4   9  125.30    8.72
   0  -4  -9  128.91    8.85
   1  -4  -9    1.10    1.06
   1   4   9    0.29    1.08
  -1   4  -9    1.55    1.41
  -1  -4  -9   -0.64    0.99
  -1   4   9    1.07    1.19
   1   4  -9    0.20    1.43
  -2   4  -9   63.04    5.54
   2  -4  -9   70.21    5.64
  -2  -4  -9   64.97    5.11
   3   4   9    2.90    1.39
   3  -4  -9    1.37    1.70
  -3  -4  -9    0.58    1.01
   3   4  -9    1.67    1.51
   4  -4  -9   24.57    3.57
   4   4  -9   23.17    3.57
   5   4   9    4.03    1.56
   5  -4  -9    0.80    1.76
   5   4  -9    2.16    1.52
   6  -4  -9   43.88    5.16
   6   4   9   45.33    4.15
   6   4  -9   42.16    4.92
   7  -4  -9    1.12    2.06
   7   4   9    3.37    1.58
   7   4  -9    0.08    1.81
   8   4   9    1.09    2.03
   8  -4  -9   -0.03    2.04
   8   4  -9    1.24    2.20
   9  -4  -9   15.41    3.54
   9   4   9    8.44    2.69
   9  -4   9   17.16    4.22
   9   4  -9   10.04    3.45
  10  -4  -9   14.20    3.79
  10   4   9   18.39    3.52
  10   4  -9   20.50    4.41
  10  -4   9   17.21    4.37
  11  -4  -9    3.74    2.90
  11   4   9    3.19    2.55
  11  -4   9   -4.05    2.74
  11   4  -9    0.51    2.46
  12   4   9    0.30    2.88
  12  -4  -9    0.26    2.46
  12  -4   9   -1.37    3.24
  12   4  -9   -5.21    2.45
  13  -4  -9   -4.33    2.61
  13   4   9   -3.47    2.73
  13   4  -9   -2.33    2.46
  13  -4   9    1.21    3.35
  14   4   9    1.21    2.96
  14  -4  -9   -5.23    3.01
  14   4  -9    2.39    3.28
  14  -4   9    1.59    3.86
  15  -4  -9    2.44    3.67
  15   4   9   -2.78    3.13
  15  -4   9   -6.39    3.64
  15   4  -9    0.67    3.35
  16  -4  -9   -2.84    3.88
  16   4   9   -6.89    3.10
  16  -4   9   -1.28    4.10
  16   4  -9    4.96    4.50
  17   4   9   -1.85    3.74
  17  -4  -9   -8.17    4.22
  17  -4   9   -9.55    4.27
  17   4  -9    0.00    4.45
   0   4 -10  802.96   50.36
   0   4  10  792.83   49.93
   0  -4 -10  848.64   50.14
   1  -4 -10    7.94    2.17
  -1   4 -10    7.54    2.23
   1   4  10    4.80    1.58
  -1  -4 -10    9.17    1.94
   1   4 -10    6.81    2.28
  -2   4 -10   79.34    6.44
   2  -4 -10   78.07    6.52
   2   4  10   73.55    6.00
  -2  -4 -10   77.17    5.96
   2   4 -10   82.35    6.67
   3  -4 -10  340.76   21.84
   3   4  10  341.26   21.28
  -3  -4 -10  329.51   21.09
   3   4 -10  320.61   21.94
   4  -4 -10   10.40    2.72
   4   4  10   10.87    2.19
   4   4 -10    5.78    2.31
   5  -4 -10  904.23   55.05
   5   4  10  875.81   54.16
   5   4 -10  872.84   55.96
   6  -4 -10   91.65    7.85
   6   4  10   81.24    6.50
   6   4 -10   79.67    7.51
   7  -4 -10  190.95   13.42
   7   4 -10  163.99   13.10
   8   4  10   21.48    3.58
   8  -4 -10   22.74    4.53
   8   4 -10   14.71    3.85
   9  -4 -10    5.01    2.99
   9   4  10    0.87    2.29
   9  -4  10    2.04    3.09
   9   4 -10   -1.19    2.38
  10  -4 -10  203.48   15.45
  10   4  10  205.97   14.20
  10  -4  10  189.10   14.99
  10   4 -10  214.24   15.53
  11   4  10   45.59    5.51
  11  -4 -10   30.78    5.86
  11  -4  10   46.66    6.59
  11   4 -10   32.86    5.90
  12   4  10  212.11   15.44
  12  -4  10  231.81   16.84
  12   4 -10  223.35   16.85
  13   4  10   24.25    4.80
  13  -4 -10   26.02    5.58
  13   4 -10   31.95    5.86
  14   4  10   59.11    6.97
  14  -4 -10   42.83    7.38
  14  -4  10   47.77    7.73
  14   4 -10   52.47    7.77
  15  -4 -10    4.56    4.47
  15   4  10   -4.23    3.26
  15   4 -10    6.60    3.93
  15  -4  10   12.04    5.00
  16  -4 -10   10.87    4.87
  16   4  10   15.61    4.22
  16  -4  10   17.56    5.66
  16   4 -10    6.26    4.76
  17  -4 -10    5.77    5.12
  17   4  10   -0.26    4.05
  17  -4  10    2.44    4.97
  17   4 -10    5.05    4.97
   0  -4 -11   26.00    3.55
   0   4 -11   22.67    3.55
  -1   4 -11    5.82    2.06
   1  -4 -11    4.73    1.80
  -1  -4 -11    5.72    1.80
   1   4 -11    1.99    1.90
   2   4  11   15.63    3.09
  -2   4 -11   20.29    3.38
   2  -4 -11   23.52    3.52
   2   4 -11   21.63    3.51
  -2  -4 -11   22.65    3.08
   3  -4 -11   21.84    3.72
   3   4  11   25.42    3.44
  -3  -4 -11   21.70    3.11
   3   4 -11   22.30    4.31
   4  -4 -11    2.11    2.09
   4   4  11    2.22    1.84
   4   4 -11    0.50    1.90
   5  -4 -11   54.92    6.65
   5   4 -11   54.46    5.91
   6  -4 -11    3.71    2.64
   6   4 -11    8.78    2.82
   7  -4 -11   -1.34    2.03
   7   4 -11   -2.59    1.86
   8  -4 -11    1.81    2.85
   8   4 -11   10.36    3.37
   9  -4 -11   13.65    3.95
   9   4  11   17.90    3.37
   9   4 -11    9.51    3.56
  10   4  11   -3.98    2.31
  10  -4 -11   -2.56    2.29
  10   4 -11    0.90    2.74
  10  -4  11    4.67    3.28
  11  -4 -11   17.78    4.33
  11   4  11    9.48    3.36
  11   4 -11   12.61    3.83
  11  -4  11   21.69    4.68
  12  -4 -11    2.71    3.45
  12   4  11    2.18    3.06
  12  -4  11   -1.02    3.00
  13   4  11    2.31    3.15
  13  -4 -11   -1.18    3.26
  13   4 -11   10.52    3.92
  13  -4  11    5.52    3.97
  14  -4 -11   -3.61    3.20
  14   4  11   -0.01    3.24
  14  -4  11   -1.31    3.92
  14   4 -11    5.34    4.00
  15   4  11   -0.32    3.55
  15  -4 -11    5.06    4.50
  15  -4  11    2.20    3.86
  15   4 -11    3.86    4.52
  16   4  11   -6.41    3.71
  16   4 -11   -0.53    4.30
  16  -4  11    0.92    4.48
   0   4 -12   87.73    7.97
   0  -4 -12   82.19    7.00
   1  -4 -12    7.36    2.29
  -1   4 -12    4.34    2.68
  -1  -4 -12    4.51    1.85
   1   4 -12    8.98    2.67
   2  -4 -12   -1.36    1.70
  -2   4 -12    0.35    1.70
   2   4 -12    3.05    1.86
  -2  -4 -12    5.18    1.86
   3  -4 -12  100.09    8.21
   3   4 -12   90.04    8.14
  -3  -4 -12  101.37    7.59
   4  -4 -12  102.11    9.84
   4   4 -12  117.52    9.37
   5  -4 -12  110.97    9.32
   5   4 -12  103.06    9.13
   6  -4 -12  219.95   15.71
   6   4 -12  213.16   15.87
   7  -4 -12    1.71    2.60
   7   4 -12    2.54    2.27
   8  -4 -12  161.86   13.15
   8   4 -12  170.22   13.18
   9   4  12   23.25    4.08
   9  -4 -12   10.30    3.86
   9   4 -12   10.79    3.75
  10  -4 -12   30.70    5.71
  10  -4  12   42.17    6.57
  10   4 -12   31.84    5.84
  11  -4 -12  107.01   11.89
  11   4  12  101.48    9.00
  11  -4  12  108.21   10.15
  11   4 -12  109.12   10.57
  12   4  12   65.05    7.13
  12  -4 -12   67.29    8.02
  12   4 -12   57.87    7.99
  13  -4 -12    6.06    4.31
  13   4  12   12.25    4.22
  13  -4  12   20.64    5.39
  13   4 -12   20.68    5.24
  14   4  12   62.92    7.65
  14  -4 -12   59.62    8.84
  14  -4  12   63.42    8.71
  14   4 -12   66.08    8.85
  15   4  12   -2.10    3.49
  15  -4 -12   -2.00    4.17
  15  -4  12   -0.83    4.49
  15   4 -12    3.98    4.18
  16  -4 -12    3.72    5.08
  16   4 -12   -1.96    7.14
  16  -4  12   19.09    6.12
   0  -4 -13    1.32    1.84
   0   4 -13    2.61    2.13
  -1   4 -13    0.06    1.82
   1  -4 -13    1.64    1.85
   1   4 -13    1.09    1.67
  -1  -4 -13    1.74    1.95
  -2   4 -13    4.66    2.16
   2  -4 -13    8.04    2.78
  -2  -4 -13    7.97    2.35
   2   4 -13    4.20    2.36
   3  -4 -13    6.40    2.72
   3   4 -13    6.42    2.67
  -3  -4 -13    3.00    1.94
   4  -4 -13    9.68    3.08
   4   4 -13   10.63    3.06
   5  -4 -13   18.54    3.87
   5   4 -13   18.04    3.91
   6  -4 -13    0.82    2.52
   6   4 -13    4.27    2.82
   7  -4 -13   10.50    3.69
   7   4 -13    6.87    3.01
   8  -4 -13    5.64    3.18
   8   4 -13    3.43    2.80
   9  -4 -13   20.18    4.57
   9   4 -13   22.36    5.32
  10   4  13   19.78    3.88
  10  -4 -13   20.80    5.04
  10   4 -13   13.67    3.93
  11  -4 -13    7.55    3.99
  11   4  13   10.96    3.80
  11   4 -13   16.66    4.77
  11  -4  13    8.27    4.15
  12   4  13    1.53    3.36
  12  -4 -13   -0.37    3.51
  12   4 -13    2.68    3.44
  12  -4  13    4.58    4.16
  13   4  13   -0.20    3.28
  13  -4 -13   -2.82    3.24
  13  -4  13    3.91    4.04
  13   4 -13   -0.12    3.51
  14  -4 -13    8.92    4.85
  14   4  13   -2.41    3.71
  14  -4  13    0.67    4.11
  14   4 -13    3.81    4.01
  15   4  13   17.94    4.81
  15  -4  13    3.66    5.13
  15   4 -13   12.64    4.60
  16   4  13   -7.81    4.44
  16  -4 -13    8.07    5.41
  16  -4  13   10.25    5.73
  16   4 -13   10.04    5.10
   0  -4 -14   29.20    4.34
   0   4 -14   28.21    4.51
  -1   4 -14    1.62    2.33
  -1  -4 -14    4.69    2.57
   1   4 -14    1.63    2.15
  -2   4 -14   44.40    5.77
   2  -4 -14   40.02    5.59
  -2  -4 -14   46.87    4.92
   2   4 -14   51.49    6.45
   3  -4 -14   11.99    3.50
  -3  -4 -14   14.62    3.15
   3   4 -14    7.23    3.26
   4  -4 -14    0.93    2.33
   4   4 -14   -1.61    1.91
   5  -4 -14   15.05    3.78
   5   4 -14    9.80    3.53
   6  -4 -14   43.50    6.49
   6   4 -14   43.36    6.38
   7  -4 -14    8.85    3.72
   7   4 -14   10.76    3.48
   8  -4 -14    8.91    3.84
   8   4 -14    8.16    3.58
   9  -4 -14   61.16    8.12
   9   4 -14   58.05    7.99
  10   4  14   10.55    3.75
  10  -4 -14    8.50    4.56
  10   4 -14    5.90    3.57
  11   4  14    1.14    3.13
  11  -4 -14   -8.33    3.04
  11   4 -14   -0.46    3.20
  11  -4  14    0.28    3.51
  12   4  14    1.79    3.48
  12  -4 -14   -4.72    3.47
  12  -4  14    4.80    3.99
  12   4 -14    0.76    3.52
  13  -4 -14    1.47    4.70
  13   4  14    2.98    3.94
  13   4 -14    2.59    3.74
  13  -4  14    4.63    4.40
  14   4  14    3.21    3.72
  14  -4 -14   -5.85    4.33
  14   4 -14    2.87    3.98
  14  -4  14   -0.06    4.74
  15  -4 -14   12.60    5.27
  15   4 -14    5.07    5.94
  15  -4  14   11.02    5.44
   0  -4 -15   24.29    4.23
   0   4 -15   21.29    4.00
  -1   4 -15   -1.48    1.74
   1  -4 -15   -0.45    2.37
   1   4 -15    0.44    1.96
  -1  -4 -15    2.18    2.39
  -2   4 -15    1.29    2.23
   2  -4 -15    2.31    2.39
   2   4 -15    4.04    2.50
   3  -4 -15    7.09    3.25
  -3  -4 -15    4.84    2.46
   3   4 -15    1.88    2.30
   4  -4 -15    1.91    2.81
   4   4 -15   -3.00    1.96
   5  -4 -15    2.88    2.59
   5   4 -15   -2.72    2.16
   6  -4 -15    9.37    3.24
   6   4 -15   13.29    3.53
   7  -4 -15    2.84    3.06
   7   4 -15    2.83    2.90
   8  -4 -15   13.22    4.30
   8   4 -15   15.54    5.19
   9  -4 -15    7.58    4.17
   9   4 -15    6.43    3.66
  10   4  15   13.84    4.27
  10  -4 -15    3.21    3.75
  10   4 -15    9.65    3.90
  11  -4 -15    2.69    3.87
  11   4  15   -0.67    3.34
  11   4 -15    6.72    4.10
  11  -4  15    3.84    3.48
  12  -4 -15    6.06    4.52
  12   4  15    5.43    3.90
  12  -4  15   -4.68    3.55
  12   4 -15    6.25    4.27
  13  -4 -15    2.48    4.79
  13   4  15   -1.35    3.88
  13  -4  15   -2.48    4.58
  13   4 -15    2.33    4.15
  14  -4 -15    6.50    5.30
  14   4  15    3.93    4.48
  14   4 -15    3.68    5.94
  14  -4  15    3.92    5.14
   0   4 -16   63.47    6.85
   0  -4 -16   65.00    6.67
   1  -4 -16   79.37    8.02
  -1   4 -16   86.43    8.09
   1   4 -16   93.71    8.39
  -1  -4 -16   88.71    7.89
   2  -4 -16   15.13    3.77
  -2   4 -16   12.76    3.40
  -2  -4 -16   10.98    3.19
   2   4 -16   13.08    3.68
   3  -4 -16   13.42    4.02
   3   4 -16   22.53    4.55
  -3  -4 -16   19.11    3.97
   4  -4 -16    6.95    2.86
   4   4 -16   11.13    3.66
   5  -4 -16  122.05   10.50
   5   4 -16  112.81   10.52
   6  -4 -16   45.27    6.94
   6   4 -16   59.24    7.89
   7  -4 -16  153.64   13.03
   7   4 -16  153.26   16.56
   8  -4 -16   52.61    7.91
   9  -4 -16    1.32    3.94
   9   4 -16   10.81    4.04
  10  -4 -16   57.37    8.50
  10   4  16   48.95    7.01
  10   4 -16   53.19    7.86
  11   4  16    2.27    3.63
  11  -4 -16    1.77    4.37
  11  -4  16    8.83    4.95
  11   4 -16    1.84    3.69
  12   4  16    7.91    4.46
  12  -4 -16    1.79    4.55
  12  -4  16   -3.35    3.72
  12   4 -16    0.53    4.03
  13  -4 -16    8.84    6.85
  13   4  16   10.03    4.63
  13   4 -16    8.94    4.81
  13  -4  16   11.64    5.48
  14   4  16   28.72    6.89
  14  -4 -16   30.06    8.07
  14   4 -16   29.09    7.07
  14  -4  16   41.18    8.01
   0   4 -17    5.15    2.85
   0  -4 -17   -0.29    2.40
   1  -4 -17   13.40    3.77
  -1   4 -17   12.16    3.72
  -1  -4 -17   14.08    3.61
   1   4 -17    7.50    3.25
   2  -4 -17    1.20    2.57
  -2   4 -17   -0.21    2.23
  -2  -4 -17   -0.76    2.17
   2   4 -17    2.10    2.46
   3  -4 -17    6.83    3.28
  -3  -4 -17    7.57    2.73
   3   4 -17   -0.07    2.66
   4  -4 -17   18.29    4.28
   4   4 -17   20.82    4.61
   5  -4 -17    1.28    3.22
   6  -4 -17   -1.03    3.01
   6   4 -17    0.41    2.85
   7  -4 -17   -0.18    3.29
   7   4 -17   -2.22    2.84
   8  -4 -17   -2.60    3.31
   8   4 -17    5.72    3.03
   9  -4 -17   10.81    4.50
   9   4 -17   -1.18    3.43
  10  -4 -17   -1.69    3.21
  10   4  17    1.80    3.54
  10   4 -17    5.86    3.59
  11  -4 -17    4.17    4.47
  11   4  17    3.39    3.90
  11   4 -17   -4.29    4.00
  12  -4 -17    1.92    5.07
  12   4  17   -5.43    3.88
  12   4 -17    0.83    4.19
  12  -4  17    2.36    4.56
  13  -4 -17    3.06    4.96
  13  -4  17   -1.52    4.62
  13   4 -17    0.41    4.85
   0   4 -18   90.05    8.90
   0  -4 -18   92.91    8.55
   1  -4 -18   98.40    9.29
  -1   4 -18   92.12    9.05
   1   4 -18   95.14    9.16
  -1  -4 -18  104.31    8.83
  -2   4 -18   10.13    3.52
   2  -4 -18   15.63    4.03
  -2  -4 -18   20.24    4.25
   2   4 -18   25.10    5.57
   3  -4 -18  169.87   13.72
  -3  -4 -18  171.02   13.11
   3   4 -18  170.23   17.49
   4  -4 -18    2.77    3.57
   4   4 -18    1.07    2.81
   5  -4 -18   66.94    9.38
   5   4 -18   63.57    8.36
   6  -4 -18   14.58    4.88
   6   4 -18   16.03    4.19
   7  -4 -18    7.04    3.99
   7   4 -18   13.33    4.36
   8  -4 -18   48.66    8.07
   8   4 -18   65.08    8.86
   9  -4 -18   87.74   10.12
   9   4 -18   75.96   10.11
  10  -4 -18    0.28    4.48
  10   4 -18    9.05    4.74
  11   4  18   24.93    5.85
  11  -4 -18   25.38    6.63
  11   4 -18   22.84    6.10
  12  -4 -18   56.49    9.62
  12  -4  18   63.28    9.64
  12   4 -18   65.46    9.88
   0  -4 -19   -1.13    2.80
   0   4 -19   -1.45    2.80
  -1   4 -19    5.62    3.41
   1  -4 -19    6.66    3.47
   1   4 -19   10.43    3.77
  -1  -4 -19   11.29    3.52
  -2   4 -19    2.02    2.90
   2  -4 -19    6.07    3.11
   2   4 -19   -1.36    2.68
  -2  -4 -19    4.25    2.84
   3  -4 -19    5.09    3.31
  -3  -4 -19    0.59    2.92
   3   4 -19    7.66    3.45
   4  -4 -19    3.48    4.61
   4   4 -19    0.84    2.95
   5  -4 -19    0.42    3.61
   5   4 -19    4.01    3.54
   6  -4 -19    1.69    3.42
   6   4 -19   -0.52    3.23
   7  -4 -19    0.38    3.70
   7   4 -19   -0.98    3.56
   8  -4 -19    6.36    3.95
   8   4 -19    5.88    4.78
   9  -4 -19    1.13    4.35
   9   4 -19    5.67    4.58
  10  -4 -19    4.23    4.86
  10   4 -19    4.72    4.50
  11   4  19   -9.50    4.50
  11  -4 -19   -3.69    4.28
  11   4 -19    1.02    4.82
   0  -4 -20   13.26    4.18
   0   4 -20    7.47    3.37
   1  -4 -20    1.01    3.44
  -1   4 -20    8.31    3.50
   1   4 -20   13.63    4.26
  -1  -4 -20    0.83    3.06
   2  -4 -20   77.69   13.02
  -2  -4 -20   67.00    7.85
   2   4 -20   64.04    8.66
   3  -4 -20   -0.23    3.41
  -3  -4 -20    3.66    3.19
   3   4 -20   13.08    4.09
   4  -4 -20   41.34    6.62
   4   4 -20   19.41    5.15
   5  -4 -20   61.66    8.98
   5   4 -20   67.88    9.49
   6  -4 -20    4.62    4.21
   6   4 -20    5.90    4.15
   7  -4 -20    6.41    4.61
   7   4 -20   14.40    5.36
   8  -4 -20    6.07    4.71
   8   4 -20    6.26    4.57
   9  -4 -20   18.61    6.63
  10  -4 -20   43.56    7.87
  10   4 -20   44.21    8.11
   0  -4 -21    2.31    3.42
   0   4 -21    3.39    3.29
   1  -4 -21    2.08    3.57
  -1   4 -21    6.90    3.89
   1   4 -21   14.83    3.87
  -1  -4 -21    6.84    3.96
   2  -4 -21    5.51    3.71
   2   4 -21    3.72    3.86
   3  -4 -21    2.87    3.77
   3   4 -21    4.53    3.96
   4  -4 -21    0.70    3.85
   4   4 -21    2.71    3.48
   5  -4 -21    1.15    4.10
   5   4 -21    0.56    3.92
   6  -4 -21   -3.11    4.67
   6   4 -21    3.76    4.63
   7  -4 -21   -5.55    4.39
   7   4 -21    1.04    4.55
   8  -4 -21   -2.83    4.56
   8   4 -21    0.16    4.24
   9  -4 -21   -2.06    4.51
   9   4 -21    0.27    4.39
   0  -4 -22   20.71    4.72
   0   4 -22   13.14    4.70
  -1   4 -22   11.29    4.41
   1  -4 -22   16.64    5.64
  -1  -4 -22   20.44    4.82
   1   4 -22   10.37    4.80
   2  -4 -22   37.58    6.48
  -2  -4 -22   39.03    6.92
   2   4 -22   31.53    6.38
   3  -4 -22    2.81    4.39
   3   4 -22    4.67    4.46
   4  -4 -22   22.68    5.93
   4   4 -22   16.72    5.11
   5  -4 -22   10.50    4.92
   5   4 -22    4.73    5.13
   6  -4 -22    1.58    4.99
   6   4 -22    4.41    5.02
   7   4 -22    5.89    5.54
   0  -4 -23   -2.18    4.02
   0   4 -23    7.38    4.19
  -1   4 -23    1.34    3.75
   1  -4 -23    1.90    4.41
  -1  -4 -23   -0.22    4.07
   1   4 -23   -1.90    4.03
   2  -4 -23    8.16    5.16
   2   4 -23   -2.64    5.11
  -2  -4 -23    2.35    4.00
   3  -4 -23   -2.73    4.25
   3   4 -23    9.36    8.06
   4  -4 -23    3.12    4.45
   4   4 -23    4.10    4.42
   5  -4 -23    7.49    5.81
   5   4 -23    8.85    4.97
   0   4 -24    4.32    4.42
   0  -4 -24    1.38    4.74
   1  -4 -24   36.58    7.47
   1   4 -24   32.15    7.07
  -1  -4 -24   33.24    6.89
   2  -4 -24    4.66    4.80
   2   4 -24    4.47    4.96
   1  -5   0   62.03    4.69
  -1  -5   0   68.36    4.34
   2   5   0   -0.02    0.40
  -2  -5   0    0.10    0.38
   2  -5   0   -0.20    0.84
   3   5   0  783.02   44.62
  -3  -5   0  721.69   44.54
   3  -5   0  716.42   45.13
  -4   5   0    3.96    1.78
   4  -5   0   -1.70    1.42
  -4  -5   0    0.07    0.79
   4   5   0   -0.20    0.69
  -5   5   0 2651.92  157.39
   5  -5   0 2440.49  157.23
  -5  -5   0 2657.20  156.64
   5   5   0 2714.71  156.71
  -6  -5   0    0.66    1.27
   6  -5   0    1.18    2.14
   6   5   0   -0.77    1.24
   7   5   0  186.18   12.16
  -7  -5   0  186.42   12.17
   7  -5   0  181.69   12.91
  -8  -5   0   -2.10    1.47
   8   5   0    0.94    1.18
   8  -5   0   -1.83    1.86
   9   5   0  150.93   10.55
  10  -5   0    1.73    2.52
  10   5   0   -1.22    1.70
  11  -5   0   67.55    7.10
  11   5   0   63.47    5.99
  12   5   0   -1.14    2.02
  12  -5   0    2.31    2.67
  13  -5   0    5.68    3.64
  13   5   0    3.89    2.41
  14  -5   0    3.28    3.54
  14   5   0    0.42    2.30
  15   5   0  111.20    9.88
  15  -5   0  130.76   11.24
  16   5   0   -1.87    2.73
  16  -5   0   -4.57    3.68
  17  -5   0    6.92    4.85
  17   5   0    4.21    4.46
  18   5   0    1.08    3.68
  18  -5   0   -0.55    4.81
   0  -5  -1    0.46    0.67
   0  -5   1    0.08    0.52
   1  -5  -1  487.48   30.85
  -1  -5   1  504.57   30.77
  -1  -5  -1  513.43   30.51
   1   5  -1  524.98   30.78
   2  -5  -1  152.91   10.70
  -2  -5   1  177.76   10.50
   2   5  -1  174.58   10.49
  -2   5   1  159.78   10.73
   3  -5  -1 1431.02   87.46
  -3  -5   1 1437.87   87.04
   3   5   1 1465.32   86.76
  -3   5   1 1437.74   87.45
  -3  -5  -1 1409.51   86.73
   3  -5   1 1501.73   87.57
   3   5  -1 1476.73   87.10
   4   5   1   18.38    1.71
  -4  -5   1   18.98    1.93
   4  -5  -1   20.60    2.96
  -4   5   1   19.81    3.14
   4   5  -1   18.84    2.04
  -4  -5  -1   16.49    1.84
   4  -5   1   24.56    3.19
  -5  -5   1 2260.63  137.27
   5   5   1 2395.98  137.15
   5  -5  -1 2357.73  137.92
  -5   5   1 2273.36  137.89
  -5  -5  -1 2301.75  137.12
   5   5  -1 2295.92  137.38
   5  -5   1 2145.09  137.82
  -6  -5   1   47.42    3.78
   6   5   1   46.12    3.54
   6  -5  -1   40.33    4.53
   6   5  -1   43.73    3.74
  -6  -5  -1   37.30    3.53
   6  -5   1   35.42    4.54
  -7  -5   1  574.36   35.87
   7   5   1  576.54   35.73
   7  -5  -1  599.46   36.63
   7   5  -1  589.52   35.97
   7  -5   1  590.14   36.60
  -7  -5  -1  571.93   35.78
  -8  -5   1   80.57    6.45
   8  -5  -1   84.13    7.09
   8   5   1   81.49    6.28
   8  -5   1   86.32    7.26
  -8  -5  -1   83.11    6.39
   8   5  -1   87.23    6.50
   9   5   1  180.46   12.28
   9   5  -1  180.83   12.48
  -9  -5  -1  184.82   12.42
  10  -5  -1    1.37    2.27
  10   5   1   -1.83    1.48
  10   5  -1   -0.20    1.58
  10  -5   1    0.36    2.72
  11   5   1   29.24    3.97
  11  -5  -1   21.11    4.51
  11  -5   1   21.43    4.48
  11   5  -1   19.60    3.59
  12  -5  -1   14.25    4.06
  12   5   1   12.59    3.04
  12  -5   1    7.68    3.73
  12   5  -1   14.04    3.14
  13   5   1   34.96    4.90
  13  -5  -1   29.54    5.32
  13   5  -1   38.42    5.39
  13  -5   1   36.60    5.99
  14   5   1   15.90    3.85
  14  -5  -1   18.98    4.54
  14   5  -1   15.70    3.74
  14  -5   1   18.15    4.84
  15  -5  -1   87.34    8.83
  15   5   1   85.79    7.58
  15  -5   1   69.90    8.29
  15   5  -1   63.37    7.32
  16   5   1   26.32    4.26
  16  -5  -1   26.63    6.00
  16  -5   1   26.54    5.67
  16   5  -1   33.06    5.19
  17   5   1   17.34    5.48
  17  -5  -1   13.94    5.27
  17   5  -1   25.60    4.63
  17  -5   1   16.27    5.62
  18   5   1   42.81    6.84
  18  -5  -1   45.24    8.21
  18  -5   1   62.35    8.68
  18   5  -1   50.90    6.79
   0   5   2    0.17    0.57
   0  -5   2    0.51    0.65
   0  -5  -2    0.61    0.59
   1  -5  -2   24.81    2.43
  -1  -5   2   32.10    2.49
  -1   5   2   26.91    2.47
   1   5  -2   34.46    2.52
  -2  -5   2  643.52   37.49
   2  -5  -2  583.48   37.55
   2   5  -2  661.62   37.52
  -2   5   2  580.39   37.52
  -3  -5   2  675.37   38.76
   3  -5  -2  551.82   38.87
   3   5  -2  701.20   38.86
  -3   5   2  621.22   38.95
   4   5   2   21.63    1.78
  -4  -5   2   20.82    2.23
   4  -5  -2   20.17    2.96
  -4  -5  -2   19.18    1.97
   4   5  -2   18.93    2.32
  -4   5   2   24.46    3.06
   4  -5   2   22.31    3.15
  -5  -5   2  160.00    9.87
   5   5   2  151.85    9.44
   5  -5  -2  129.07   10.25
  -5   5   2  148.00   10.45
   5   5  -2  163.85   10.04
   5  -5   2  145.21   10.55
  -5  -5  -2  138.75    9.51
   6   5   2  205.11   12.99
   6  -5  -2  208.25   13.97
   6  -5   2  201.71   13.98
   6   5  -2  211.64   13.48
  -6  -5  -2  198.97   13.06
   7   5   2  853.49   51.59
   7  -5  -2  827.08   52.42
  -7  -5   2  848.19   51.89
   7   5  -2  881.88   52.06
   7  -5   2  867.26   52.57
  -7  -5  -2  824.27   51.63
   8   5   2   -0.36    1.05
   8  -5  -2    1.74    1.85
   8  -5   2    3.72    2.31
   8   5  -2   -1.46    1.26
  -8  -5  -2    1.34    1.85
   9  -5  -2   19.83    4.20
   9   5   2   17.93    2.82
   9   5  -2   16.28    2.95
  -9  -5  -2   16.55    2.87
  10   5   2  126.88    8.81
  10  -5  -2  118.26    9.69
  10   5  -2  119.20    9.14
  10  -5   2  112.64    9.77
  11   5   2   47.00    4.89
  11  -5  -2   58.60    6.14
  11  -5   2   41.51    6.12
  11   5  -2   45.28    5.16
  12   5   2   13.98    3.09
  12  -5  -2   14.84    4.01
  12   5  -2   13.91    3.13
  12  -5   2   16.14    4.35
  13  -5  -2   69.21    7.36
  13   5   2   55.61    6.18
  13   5  -2   54.77    6.25
  13  -5   2   64.71    7.18
  14   5   2    3.36    2.59
  14  -5  -2    1.26    3.12
  14  -5   2   -0.39    3.13
  14   5  -2   -1.01    2.40
  15   5   2   27.20    4.65
  15  -5  -2   28.75    5.89
  15   5  -2   37.93    5.54
  15  -5   2   20.37    5.25
  16  -5  -2   -4.56    3.51
  16   5   2    5.50    3.06
  16  -5   2    4.66    3.85
  16   5  -2    0.27    3.19
  17  -5  -2   32.02    6.60
  17   5   2   24.31    4.57
  17  -5   2   24.87    5.54
  17   5  -2   20.49    4.79
  18  -5  -2   46.95    8.08
  18   5   2   35.61    6.17
  18  -5   2   37.30    6.96
  18   5  -2   37.69    6.33
   0  -5  -3    0.14    0.49
   0   5   3   -0.19    0.62
   0  -5   3   -0.06    0.63
   0   5  -3   -0.41    0.60
  -1  -5   3   -0.01    0.62
   1  -5  -3    0.21    0.70
   1   5   3    0.27    0.52
  -1   5   3    1.58    0.76
   1   5  -3    3.15    0.84
   1  -5   3    0.50    0.77
  -1  -5  -3    0.91    0.39
  -2  -5   3 2622.20  154.81
   2  -5  -3 2512.06  154.76
  -2   5   3 2550.01  154.75
   2   5  -3 2650.45  154.84
  -3  -5   3  282.61   18.13
   3  -5  -3  306.79   18.37
  -3   5   3  280.43   18.27
   3   5  -3  289.39   18.26
   4  -5  -3   81.79    6.49
   4   5   3   84.80    5.37
  -4  -5   3   83.09    6.02
  -4   5   3   79.24    6.38
   4   5  -3   89.50    6.18
   5   5   3   59.58    4.40
   5  -5  -3   61.90    5.60
  -5  -5   3   66.62    4.95
   5  -5   3   66.09    5.98
   5   5  -3   69.17    5.17
  -5   5   3   58.74    5.53
   6   5   3 1314.44   77.55
   6  -5  -3 1259.70   78.47
  -6  -5   3 1283.24   78.05
   6   5  -3 1295.69   78.23
   6  -5   3 1295.43   78.59
  -7  -5   3  471.94   30.04
   7  -5  -3  522.00   30.76
   7   5  -3  472.15   30.21
   7  -5   3  465.71   30.61
   8  -5  -3   28.84    4.27
   8   5   3   26.28    2.81
   8  -5   3   17.76    3.80
   8   5  -3   29.22    3.70
   9  -5  -3   29.77    4.51
   9   5   3   28.41    3.43
   9   5  -3   36.01    4.21
   9  -5   3   34.32    4.87
  10  -5  -3   91.69    8.31
  10   5   3  100.40    7.33
  10  -5   3   84.69    8.25
  10   5  -3   97.64    7.78
  11  -5  -3  103.55    9.42
  11   5   3  113.86    8.48
  11  -5   3  113.43    9.58
  12   5   3   58.88    5.82
  12  -5  -3   61.32    6.67
  12   5  -3   59.38    6.35
  12  -5   3   55.88    6.84
  13  -5  -3   31.35    5.44
  13   5   3   37.82    4.88
  13   5  -3   39.04    5.21
  13  -5   3   29.29    5.56
  14   5   3   -0.04    2.36
  14  -5  -3    1.88    4.58
  14  -5   3    4.21    3.51
  14   5  -3    1.62    2.71
  15   5   3   71.81    7.02
  15  -5  -3   73.13    8.60
  15   5  -3   69.91    7.69
  15  -5   3   68.76    8.12
  16   5   3   85.24    8.47
  16  -5  -3   95.10   10.11
  16  -5   3   98.73    9.98
  16   5  -3  103.46   10.17
  17  -5  -3   31.10    6.97
  17   5   3   25.77    5.09
  17  -5   3   27.13    6.47
  17   5  -3   33.28    5.63
  18  -5  -3   -5.21    7.38
  18   5   3   -0.72    3.96
  18   5  -3   -1.42    3.45
  18  -5   3   -4.42    4.04
   0   5  -4    0.24    0.73
   0  -5   4    1.88    0.84
   0   5   4    0.47    0.68
   0  -5  -4    0.02    0.60
   1   5   4   55.38    3.89
   1  -5  -4   50.64    4.21
  -1  -5   4   64.31    4.63
   1   5  -4   63.67    4.59
  -1   5   4   57.80    4.26
   1  -5   4   67.48    4.70
  -1  -5  -4   60.99    3.96
  -2  -5   4  150.64    9.34
   2  -5  -4  123.14    9.11
   2   5  -4  157.79    9.43
  -2   5   4  126.51    9.11
  -3  -5   4    0.53    1.00
   3  -5  -4    0.15    1.26
  -3   5   4   -1.71    1.32
   3   5  -4    0.69    1.17
   4   5   4  154.15    9.69
   4  -5  -4  156.08   10.73
   4   5   4  151.84    9.71
   4   5  -4  159.48   10.60
  -4   5   4  162.44   10.75
   5  -5  -4  421.50   26.41
   5   5   4  416.32   25.39
  -5  -5   4  418.72   26.08
  -5   5   4  384.67   26.66
   5   5  -4  443.36   26.30
   6  -5  -4  401.80   27.47
   6   5   4  433.10   26.60
  -6  -5   4  456.60   27.26
   6   5  -4  450.49   27.39
   6  -5   4  429.03   27.68
   7  -5  -4   35.22    4.16
   7   5  -4   32.74    3.67
   7  -5   4   29.37    4.24
   8  -5  -4   89.94    7.38
   8   5   4   90.11    6.36
   8   5  -4   83.88    6.98
   8  -5   4   80.46    7.40
   9  -5  -4   50.87    5.66
   9   5   4   47.40    4.59
   9  -5   4   58.87    5.96
   9   5  -4   57.01    5.38
  10  -5  -4    4.59    2.87
  10   5   4    2.12    1.81
  10   5  -4   -1.31    1.95
  10  -5   4    4.26    3.07
  11   5   4   -0.09    1.82
  11  -5  -4    0.28    2.47
  11   5  -4    0.35    2.21
  11  -5   4   -0.09    2.93
  12  -5  -4   42.46    5.94
  12   5   4   34.96    4.78
  12  -5   4   42.95    6.36
  12   5  -4   39.93    5.41
  13   5   4   -1.77    1.96
  13  -5  -4   -2.61    2.81
  13   5  -4    1.81    2.68
  13  -5   4   -4.92    2.88
  14   5   4    8.63    3.10
  14  -5  -4    5.42    4.52
  14   5  -4    5.40    2.73
  14  -5   4    5.01    3.62
  15   5   4    7.08    3.05
  15  -5  -4    4.54    3.49
  15   5  -4    2.16    2.88
  15  -5   4    0.68    3.79
  16  -5  -4   45.21    7.46
  16   5   4   42.42    5.92
  16  -5   4   41.39    6.80
  16   5  -4   48.64    6.68
  17   5   4    5.31    3.84
  17  -5  -4   15.38    4.84
  17   5  -4   11.26    3.91
  17  -5   4   18.80    5.17
  18  -5  -4   -2.89    5.30
  18   5   4    5.65    3.92
  18  -5   4   -7.49    4.45
  18   5  -4    2.97    3.92
   0   5   5   -0.15    0.74
   0   5  -5    0.91    0.96
   0  -5  -5    0.32    0.77
   1   5   5   51.92    3.54
   1  -5  -5   47.94    3.92
   1   5  -5   52.40    4.19
   1  -5   5   45.04    4.17
  -1  -5  -5   49.15    3.56
  -1   5   5   50.46    3.85
  -2  -5   5  172.28   11.29
   2   5   5  163.05   10.09
   2  -5  -5  150.05   10.66
  -2  -5  -5  158.02   10.07
   2  -5   5  162.97   10.92
   2   5  -5  171.80   10.91
  -2   5   5  159.28   10.62
   3  -5  -5   74.86    5.85
   3   5   5   74.14    4.90
  -3  -5   5   74.47    5.72
   3  -5   5   78.68    5.99
   3   5  -5   74.62    5.84
  -3   5   5   70.24    5.99
  -4  -5   5  125.70    9.58
   4   5   5  148.35    9.00
   4  -5  -5  143.74    9.92
   4   5   5  141.77    8.91
  -4   5   5  149.26    9.88
   4   5  -5  135.48    9.80
   5  -5  -5  417.43   24.97
   5   5   5  413.91   23.94
  -5  -5   5  365.89   24.55
   5   5   5  383.76   23.89
   5   5  -5  373.12   24.77
   6   5   5   12.83    1.91
   6  -5  -5   12.97    2.82
   6   5  -5   14.73    2.63
   7  -5  -5   81.67    6.68
   7   5   5   73.88    5.80
   7   5  -5   75.62    6.30
   7  -5   5   69.74    6.57
   8  -5  -5  337.60   22.19
   8   5   5  335.65   20.74
   8  -5   5  323.91   21.85
   8   5  -5  319.53   21.60
   9   5   5   50.67    4.63
   9  -5  -5   53.03    6.01
   9  -5   5   56.95    6.12
   9   5  -5   52.50    5.34
  10  -5  -5   16.46    3.78
  10   5   5   10.58    2.58
  10  -5   5   10.58    3.54
  10   5  -5   12.90    3.66
  11  -5  -5    3.52    3.19
  11   5   5    8.85    2.36
  11  -5   5    3.98    3.24
  11   5  -5    4.89    2.56
  12   5   5   63.44    5.62
  12  -5  -5   61.24    6.80
  12  -5   5   41.45    6.60
  12   5  -5   49.20    6.50
  13  -5  -5   12.47    3.66
  13   5   5   15.40    3.47
  13   5  -5    7.74    3.24
  13  -5   5   14.10    4.39
  14   5   5   -5.75    2.34
  14  -5  -5    0.99    3.38
  14   5  -5    2.00    2.87
  14  -5   5   -2.37    4.06
  15  -5  -5   -5.41    3.18
  15   5   5   -4.82    2.44
  15   5  -5   -3.12    2.60
  15  -5   5    0.48    3.67
  16  -5  -5   32.05    6.86
  16   5   5   33.23    4.97
  16  -5   5   35.32    6.83
  16   5  -5   29.71    5.64
  17   5   5   -1.39    3.66
  17  -5  -5    1.77    4.32
  17  -5   5    1.31    4.26
  17   5  -5    4.66    3.58
  18   5   5   20.55    5.04
  18  -5  -5   34.37    7.04
  18  -5   5   25.77    7.06
  18   5  -5   26.11    5.84
   0   5  -6   -1.16    1.12
   0   5   6    0.54    0.97
   0  -5  -6    0.19    1.12
   0  -5   6    0.58    1.12
  -1   5  -6   12.76    2.13
  -1  -5   6    8.13    1.85
   1   5   6    9.28    1.47
  -1  -5  -6    9.82    1.58
  -1   5   6    8.12    1.68
   1  -5   6    6.05    1.72
   1   5  -6    8.15    1.98
   2   5   6    1.99    0.94
   2  -5  -6    0.27    1.22
  -2  -5   6    2.32    1.41
  -2   5   6    2.10    1.35
   2   5  -6    3.63    1.68
  -2  -5  -6    2.09    0.94
   2  -5   6    0.40    1.19
  -3  -5   6    2.00    1.24
   3  -5  -6    3.99    1.58
   3   5   6    3.33    0.98
  -3   5   6    2.94    1.63
   3   5  -6    0.92    1.47
   4  -5  -6   37.39    3.85
   4   5   6   30.99    2.64
  -4  -5   6   32.57    3.42
  -4   5   6   26.97    3.55
   4   5  -6   35.72    3.68
   5   5   6  121.65    7.98
   5   5   6  116.58    7.88
   5  -5  -6  118.32    8.92
   5   5  -6  124.54    8.90
   6  -5  -6    0.96    1.77
   6   5   6    2.72    1.30
   6   5   6    0.34    0.91
   6   5  -6   -0.76    1.39
   7  -5  -6    2.48    1.88
   7   5   6    2.19    1.44
   7   5  -6   -0.09    1.62
   7  -5   6    0.45    2.23
   8  -5  -6   48.54    5.53
   8   5   6   55.13    4.66
   8  -5   6   47.01    7.68
   8   5  -6   63.61    5.65
   9  -5  -6   61.16    6.45
   9   5   6   59.96    5.29
   9  -5   6   57.30    6.42
   9   5  -6   69.72    6.81
  10  -5  -6   45.12    6.11
  10   5   6   36.56    4.23
  10   5  -6   44.32    5.23
  10  -5   6   34.55    5.51
  11  -5  -6   19.90    4.34
  11   5   6   22.77    3.72
  11   5  -6   27.72    4.79
  11  -5   6   24.41    4.75
  12   5   6   -0.69    2.01
  12  -5  -6    2.57    2.99
  12  -5   6    0.14    3.48
  12   5  -6    2.08    2.64
  13   5   6   -1.40    2.12
  13  -5  -6    2.31    2.93
  13  -5   6   -3.00    3.00
  13   5  -6   -0.46    2.60
  14  -5  -6    2.92    3.20
  14   5   6    4.41    2.79
  14  -5   6    2.13    4.72
  14   5  -6    2.95    2.97
  15   5   6   -4.51    2.69
  15  -5  -6   -1.40    3.28
  15  -5   6   -1.86    3.60
  16   5   6    5.79    3.44
  16  -5  -6   10.10    4.30
  16  -5   6   10.53    4.36
  16   5  -6   15.54    4.32
  17  -5  -6    3.90    4.23
  17   5   6    0.24    3.64
  17  -5   6   -3.65    4.33
  17   5  -6    4.84    3.82
  18   5   6   -0.89    4.08
  18  -5  -6    9.44    5.02
  18   5  -6    4.92    4.56
   0  -5   7   -0.33    1.30
   0   5  -7   -0.35    1.20
   0   5   7   -0.64    1.02
   1  -5  -7   84.05    6.02
  -1  -5   7   70.27    6.18
  -1   5  -7   74.11    6.10
   1   5   7   78.10    5.55
  -1  -5  -7   78.11    5.64
   1   5  -7   78.13    6.19
  -1   5   7   84.24    5.83
   2   5   7  149.89    9.54
   2  -5  -7  147.80   10.07
  -2   5   7  147.69    9.86
  -2  -5  -7  144.55    9.50
   2   5  -7  140.29   10.21
   3   5   7  103.20    6.66
   3  -5  -7   95.94    7.35
  -3   5   7  103.61    7.24
   3   5  -7   85.10    7.32
   4   5   7   22.82    2.31
   4  -5  -7   22.25    3.31
   4   5  -7   19.61    3.26
   5  -5  -7  315.52   19.42
   5   5   7  282.87   18.26
   5   5  -7  281.94   19.22
   6  -5  -7   85.84    6.90
   6   5   7   77.31    5.76
   6   5  -7   78.58    6.73
   7   5   7   12.12    2.08
   7  -5  -7   14.78    3.10
   7   5   7   15.59    2.37
   7   5  -7    9.72    2.69
   8   5   7    3.56    1.43
   8  -5  -7    4.48    2.33
   8   5   7    5.71    1.96
   8   5  -7    1.28    2.11
   8  -5   7    0.89    2.49
   9  -5  -7  102.26    8.39
   9   5   7   91.04    6.86
   9  -5   7   83.96    7.98
   9   5  -7   77.73    7.51
  10   5   7  139.69   10.07
  10  -5  -7  144.43   11.46
  10   5  -7  140.37   11.09
  10  -5   7  133.89   11.38
  11   5   7   16.43    3.02
  11  -5  -7   13.37    4.06
  11  -5   7   15.98    4.36
  11   5  -7    9.58    3.34
  12   5   7   -0.13    2.37
  12  -5  -7    5.48    3.66
  12  -5   7    0.24    3.10
  12   5  -7   -0.35    2.40
  13   5   7   10.76    3.14
  13   5  -7    9.61    3.15
  13  -5   7   11.47    4.03
  14  -5  -7   28.11    5.53
  14   5   7   30.45    4.45
  14  -5   7   32.54    6.34
  14   5  -7   27.56    5.27
  15  -5  -7    1.90    3.61
  15   5   7    1.06    2.89
  15   5  -7    2.33    3.04
  15  -5   7   -1.52    3.54
  16   5   7    6.93    3.52
  16  -5  -7   10.02    4.68
  16  -5   7    2.72    4.57
  16   5  -7    9.62    3.91
  17   5   7    4.73    3.93
  17  -5  -7   19.06    5.52
  17  -5   7   17.63    5.40
  18  -5  -7   17.09    5.72
  18   5   7   21.99    5.28
  18   5  -7   24.11    5.88
  18  -5   7   13.15    6.71
   0   5  -8    0.02    1.21
   0  -5  -8   -0.91    1.14
   0   5   8   -0.32    1.00
   1   5   8  129.64    8.79
  -1   5  -8  115.59    9.24
   1  -5  -8  131.21    9.10
  -1  -5  -8  130.41    8.89
   1   5  -8  138.03    9.49
  -1   5   8  137.13    8.98
   2   5   8    6.33    1.48
   2  -5  -8    8.79    2.16
  -2   5   8    8.18    1.83
   2   5  -8    6.62    1.93
  -2  -5  -8    7.42    1.70
   3   5   8  168.51   11.15
   3  -5  -8  176.25   11.87
  -3  -5  -8  172.73   11.08
   3   5  -8  167.72   12.01
   4  -5  -8    2.82    1.73
   4   5   8    0.41    1.12
   4   5  -8    0.81    1.44
   5  -5  -8   14.84    2.92
   5   5   8   15.91    2.29
   5   5  -8   14.26    2.83
   6  -5  -8   21.50    3.54
   6   5   8   18.97    2.59
   6   5  -8   17.50    3.37
   7  -5  -8    0.64    2.21
   7   5   8    2.44    1.58
   7   5  -8    1.07    1.70
   8   5   8   24.86    3.12
   8  -5  -8   24.83    4.50
   8   5   8   33.29    3.70
   8   5  -8   25.27    4.11
   8  -5   8   31.14    4.99
   9   5   8   20.95    3.44
   9  -5  -8   30.51    4.98
   9   5   8   24.73    3.49
   9   5  -8   20.77    4.13
   9  -5   8   25.78    4.84
  10  -5  -8   57.98    6.38
  10   5   8   40.10    4.70
  10   5  -8   49.85    6.56
  10  -5   8   49.23    6.53
  11  -5  -8   61.55    6.96
  11   5   8   50.30    5.37
  11  -5   8   57.64    7.57
  11   5  -8   58.99    6.63
  12   5   8   -0.52    2.12
  12  -5  -8   -3.72    2.64
  12  -5   8    0.14    3.31
  12   5  -8    3.99    3.14
  13  -5  -8   -2.71    2.72
  13   5   8   -2.79    2.49
  13  -5   8    4.99    3.83
  13   5  -8    0.11    2.80
  14  -5  -8   11.49    4.26
  14   5   8   14.72    3.83
  14  -5   8   29.77    6.01
  15   5   8    6.02    3.31
  15  -5  -8   10.83    4.40
  15   5  -8    1.86    3.52
  15  -5   8    2.62    3.90
  16  -5  -8   -2.60    3.96
  16   5   8    0.98    3.29
  16  -5   8    4.89    4.86
  16   5  -8    1.49    3.59
  17   5   8   -0.38    3.58
  17  -5   8    0.63    4.73
  17   5  -8    2.10    4.18
   0   5   9    2.00    1.27
   0   5  -9   -2.00    1.17
   0  -5  -9    0.43    1.26
   1  -5  -9  551.00   33.28
  -1   5  -9  495.37   33.34
   1   5  -9  515.52   33.51
  -1  -5  -9  550.59   32.96
  -1   5   9  549.94   33.10
   2   5   9   25.83    2.64
   2  -5  -9   24.67    3.32
  -2  -5  -9   20.73    2.56
   2   5  -9   20.84    3.55
   3  -5  -9  268.74   17.83
   3   5   9  269.85   17.12
  -3  -5  -9  278.60   17.07
   3   5  -9  254.86   17.91
   4  -5  -9   39.52    4.35
   4   5   9   36.47    3.45
   4   5  -9   35.68    4.24
   5   5   9   66.82    5.33
   5  -5  -9   78.73    6.46
   5   5  -9   59.55    6.16
   6  -5  -9    0.91    2.01
   6   5   9    2.71    2.29
   6   5  -9    3.99    2.27
   7  -5  -9   -1.18    1.79
   7   5   9    1.04    1.55
   7   5   9    0.60    1.74
   7   5  -9    0.60    1.94
   8  -5  -9   82.85    7.74
   8   5   9   84.83    6.42
   8   5   9   74.08    6.22
   8   5  -9   75.09    7.46
   9   5   9   10.04    2.59
   9  -5  -9    6.61    2.80
   9   5  -9    5.70    2.79
   9  -5   9    4.51    3.15
  10  -5  -9   21.15    4.25
  10   5   9   16.74    3.13
  10   5  -9   23.54    4.53
  10  -5   9   17.74    4.26
  11   5   9   25.18    4.00
  11  -5  -9   24.63    4.88
  11  -5   9   28.24    5.38
  11   5  -9   32.24    5.20
  12  -5  -9   12.89    4.43
  12   5   9   16.40    3.62
  12  -5   9   16.52    4.44
  12   5  -9   13.90    3.92
  13   5   9   -1.75    2.49
  13  -5  -9   -3.91    2.72
  13   5  -9    1.67    2.84
  14  -5  -9    2.20    3.12
  14   5   9   -2.80    2.83
  14  -5   9   -2.64    3.73
  14   5  -9    1.45    3.35
  15   5   9   -2.85    2.93
  15  -5  -9    5.74    4.42
  15   5  -9    4.99    3.68
  15  -5   9    7.07    4.78
  16  -5  -9    4.81    4.23
  16   5   9   -3.41    3.18
  16  -5   9    2.30    4.59
  16   5  -9    2.11    3.90
  17   5   9    3.63    3.95
  17  -5  -9   -3.24    4.43
  17   5  -9    0.22    4.26
  17  -5   9  -13.54    4.45
   0  -5 -10    0.95    1.34
   0   5 -10    1.31    1.63
   0   5  10    0.38    1.29
   1  -5 -10    0.89    1.56
   1   5  10    5.50    1.50
  -1   5 -10    8.07    2.27
   1   5 -10    6.37    2.10
  -1  -5 -10   10.07    2.00
   2  -5 -10   12.56    2.62
   2   5  10   16.56    2.52
  -2   5 -10   12.86    2.67
   2   5 -10   12.93    2.78
  -2  -5 -10   16.83    2.46
   3   5  10   56.59    4.93
   3  -5 -10   61.82    5.71
  -3  -5 -10   70.50    5.02
   3   5 -10   55.70    5.65
   4   5  10   75.98    5.78
   4  -5 -10   64.22    6.31
   4   5 -10   77.75    6.76
   5  -5 -10    5.91    2.34
   5   5  10    6.03    1.82
   5   5 -10   10.64    4.57
   6  -5 -10  121.65    9.73
   6   5  10  120.31    8.62
   6   5 -10  118.45    9.76
   7  -5 -10    7.42    2.89
   7   5  10    7.15    1.93
   7   5 -10    6.61    2.73
   8  -5 -10   26.27    4.87
   8   5  10   35.03    4.26
   8   5 -10   31.11    4.96
   9   5  10  106.75    8.38
   9  -5 -10  113.95    9.73
   9   5 -10  110.12    9.58
   9  -5  10  106.35    9.70
  10   5  10   10.81    2.89
  10  -5 -10    8.69    3.40
  10  -5  10    7.87    3.81
  10   5 -10    9.56    3.49
  11   5  10    3.97    2.45
  11  -5 -10    4.99    3.28
  11  -5  10    1.38    2.74
  11   5 -10    3.63    2.97
  12  -5 -10    0.14    3.12
  12  -5  10   15.46    3.98
  12   5 -10    5.97    3.40
  13   5  10   10.41    3.30
  13  -5 -10   10.36    4.02
  13   5 -10    9.60    3.64
  13  -5  10    9.10    4.65
  14  -5 -10    1.65    3.47
  14   5  10   -1.76    3.02
  14   5 -10    3.67    3.26
  14  -5  10    0.86    4.27
  15   5  10    7.65    3.69
  15  -5 -10    9.06    4.49
  15  -5  10   10.75    4.85
  15   5 -10    8.91    3.87
  16   5  10   12.30    4.05
  16  -5 -10   13.12    5.40
  16  -5  10   14.71    6.24
  16   5 -10    8.43    4.64
  17  -5 -10   13.95    5.78
  17   5 -10    3.89    4.69
   0   5 -11    0.69    1.51
   0  -5 -11    0.20    1.53
   1   5  11    8.23    2.39
   1  -5 -11   10.78    2.46
  -1   5 -11   13.08    2.65
   1   5 -11   11.87    2.85
  -1  -5 -11   10.73    2.27
   2  -5 -11   42.35    4.40
   2   5  11   34.95    3.80
  -2   5 -11   28.35    4.53
  -2  -5 -11   36.17    3.79
   2   5 -11   38.58    5.53
   3   5  11  160.87   11.36
   3  -5 -11  177.97   12.20
   3   5 -11  150.42   12.79
  -3  -5 -11  173.16   11.35
   4  -5 -11  121.28    9.32
   4   5  11  115.14    8.45
   4   5 -11  109.26    9.22
   5  -5 -11   57.80    6.23
   5   5  11   59.50    5.15
   5   5 -11   51.88    6.02
   6  -5 -11  251.40   17.43
   6   5  11  234.50   16.17
   6   5 -11  252.40   17.47
   7  -5 -11  159.67   12.32
   7   5 -11  154.09   12.25
   8   5  11   12.26    3.06
   8  -5 -11    9.95    3.59
   8   5 -11   17.95    3.92
   9   5  11   60.17    5.69
   9  -5 -11   53.83    7.47
   9   5 -11   60.94    6.75
  10  -5 -11    0.44    2.85
  10   5  11    2.22    2.35
  10   5 -11   -1.17    2.54
  10  -5  11    2.09    3.28
  11   5  11    5.38    2.86
  11  -5 -11    1.69    3.42
  11   5 -11    1.95    2.85
  11  -5  11   -0.77    3.15
  12   5  11   -3.24    2.46
  12  -5 -11    4.28    3.52
  13  -5 -11   -3.04    3.54
  13   5  11    1.55    2.74
  13   5 -11   -0.32    3.20
  13  -5  11   -0.99    3.57
  14   5  11   15.40    4.11
  14  -5 -11   19.50    5.19
  14   5 -11   11.64    4.53
  14  -5  11   14.73    5.03
  15   5  11   -0.72    3.50
  15  -5 -11   -5.52    3.88
  15  -5  11   -1.97    4.33
  15   5 -11    9.26    4.04
  16   5  11    6.80    3.97
  16  -5 -11    1.10    4.66
  16   5 -11   -0.89    4.24
  16  -5  11    6.76    4.99
   0  -5 -12    1.07    1.80
   0   5 -12   -0.92    1.51
   1  -5 -12   40.96    4.38
  -1   5 -12   30.12    4.36
   1   5 -12   39.05    5.09
  -1  -5 -12   31.70    3.98
   2  -5 -12    4.05    2.07
  -2   5 -12   -1.52    1.49
   2   5 -12    0.97    1.97
  -2  -5 -12    0.06    1.50
   3  -5 -12    9.87    2.74
   3   5 -12   15.07    3.46
  -3  -5 -12    9.07    2.03
   4  -5 -12   49.42    6.81
   4   5 -12   44.93    5.50
   5  -5 -12   43.03    5.82
   5   5 -12   49.54    6.47
   6  -5 -12   -0.34    2.12
   6   5 -12   -0.18    2.21
   7  -5 -12  130.64   10.93
   7   5 -12  126.42   10.88
   8  -5 -12  109.26    9.65
   8   5 -12  101.10    9.51
   9   5  12    3.71    2.69
   9  -5 -12    4.40    3.47
   9   5 -12    2.92    2.92
  10  -5 -12    7.74    4.00
  10   5  12    5.84    3.04
  10   5 -12    1.25    2.68
  10  -5  12    5.20    3.35
  11   5  12   -2.94    3.21
  11  -5 -12    2.65    3.35
  11  -5  12    2.89    3.51
  11   5 -12    3.70    3.68
  12   5  12    5.97    3.22
  12  -5 -12    3.05    3.93
  12   5 -12    4.38    3.05
  12  -5  12    3.47    3.72
  13   5  12    3.43    3.27
  13  -5 -12    4.97    4.51
  13   5 -12    3.90    3.30
  13  -5  12    6.74    3.99
  14   5  12    4.58    3.58
  14  -5 -12    4.14    4.17
  14   5 -12   -0.33    3.56
  14  -5  12   13.72    4.92
  15  -5 -12    3.98    4.65
  15   5  12   -3.58    3.57
  15  -5  12    1.49    4.91
  15   5 -12    6.46    4.19
  16  -5 -12    8.75    4.96
  16   5  12   -3.19    3.98
  16  -5  12    5.83    5.29
   0  -5 -13    1.32    1.96
   0   5 -13   -0.05    2.00
   1  -5 -13    5.01    2.09
  -1   5 -13    0.46    1.85
   1   5 -13    9.30    2.58
  -1  -5 -13   11.05    2.50
   2  -5 -13   20.87    3.68
  -2   5 -13   15.84    3.30
  -2  -5 -13   13.86    2.90
   2   5 -13   18.12    3.66
   3  -5 -13   99.63    8.90
   3   5 -13  121.04    9.30
  -3  -5 -13  103.24    8.20
   4  -5 -13    0.24    2.18
   4   5 -13   -1.27    1.65
   5  -5 -13  221.77   15.64
   5   5 -13  201.72   15.58
   6  -5 -13   22.85    4.77
   6   5 -13   24.71    4.67
   7  -5 -13   -1.04    2.66
   7   5 -13   -0.60    2.22
   8  -5 -13   98.28    9.30
   8   5 -13   87.01    9.03
   9   5  13   21.54    3.69
   9  -5 -13   14.59    4.31
   9   5 -13   18.04    4.30
  10   5 -13   10.77    4.37
  11   5  13   34.30    5.22
  11  -5 -13   19.21    4.95
  11  -5  13   30.52    6.54
  11   5 -13   24.75    5.43
  12   5  13   68.55    7.31
  12  -5 -13   73.55    8.63
  12   5 -13   85.73    8.94
  12  -5  13   64.15    8.56
  13  -5 -13   -0.13    4.25
  13   5  13   -2.05    3.24
  13  -5  13    0.47    3.84
  13   5 -13    4.73    3.52
  14  -5 -13    9.48    4.83
  14   5  13    2.58    3.47
  14  -5  13    8.82    5.15
  14   5 -13   -0.40    3.88
  15   5  13    9.26    4.44
  15  -5 -13    5.00    5.86
  15   5 -13    3.10    4.63
  15  -5  13   16.95    5.87
   0   5 -14   -1.82    1.64
   0  -5 -14   -1.56    1.98
  -1   5 -14    1.85    2.10
   1  -5 -14    0.98    2.65
   1   5 -14   -0.94    2.01
  -1  -5 -14   -1.55    1.75
   2  -5 -14  161.87   12.33
  -2   5 -14  151.49   12.13
   2   5 -14  173.11   12.63
  -2  -5 -14  164.11   11.69
   3  -5 -14  159.17   12.49
  -3  -5 -14  169.26   11.90
   4  -5 -14    4.05    2.92
   4   5 -14   -0.59    2.08
   5  -5 -14   62.68    6.85
   5   5 -14   59.79    6.60
   6  -5 -14   26.46    5.13
   6   5 -14   20.37    4.44
   7  -5 -14   41.04    6.31
   7   5 -14   52.99    7.26
   8  -5 -14   -2.39    2.56
   8   5 -14    4.54    3.41
   9  -5 -14   27.28    5.46
   9   5 -14   38.79    6.78
  10   5  14   35.15    5.15
  10  -5 -14   36.65    6.34
  10   5 -14   30.29    5.70
  11  -5 -14    1.99    4.02
  11   5  14   -5.32    2.83
  11  -5  14    6.24    4.01
  11   5 -14   -1.12    3.05
  12  -5 -14   17.59    5.05
  12   5  14   17.54    4.48
  12  -5  14   23.53    5.63
  12   5 -14   15.70    5.07
  13  -5 -14   -0.39    3.95
  13   5  14   -3.15    3.12
  13  -5  14    0.02    3.90
  13   5 -14    3.49    3.72
  14   5  14    1.36    3.93
  14  -5 -14    7.93    4.89
  14   5 -14    0.72    4.08
  14  -5  14    3.82    4.73
  15  -5 -14   48.50    8.30
  15   5  14   42.70    8.19
  15  -5  14   47.25    8.55
  15   5 -14   45.33    8.39
   0  -5 -15   -1.65    1.83
   0   5 -15   -0.41    2.18
   1  -5 -15   43.33    5.82
  -1   5 -15   43.95    5.87
   1   5 -15   43.49    6.01
   2  -5 -15   27.85    4.93
  -2   5 -15   18.39    3.88
   2   5 -15   17.69    3.98
  -2  -5 -15   25.60    4.14
   3  -5 -15   14.10    3.64
  -3  -5 -15   21.31    3.44
   3   5 -15    9.61    3.52
   4  -5 -15    8.41    3.06
   4   5 -15    4.09    2.43
   5  -5 -15    3.66    2.83
   5   5 -15   -2.71    2.14
   6  -5 -15   28.97    5.30
   6   5 -15   28.51    5.21
   7  -5 -15  338.43   23.17
   7   5 -15  309.85   22.87
   8  -5 -15   15.88    4.61
   9  -5 -15   -2.05    3.71
   9   5 -15    1.45    3.45
  10  -5 -15    0.93    3.34
  10   5  15    4.89    3.23
  10   5 -15    0.97    3.10
  11   5  15   13.44    4.36
  11  -5 -15   12.95    4.88
  11   5 -15    7.67    4.31
  11  -5  15   13.24    4.70
  12   5  15    2.95    3.66
  12  -5 -15    0.13    4.46
  12   5 -15   -4.78    3.41
  12  -5  15   -4.20    3.78
  13  -5 -15    9.05    5.22
  13   5  15    2.72    3.91
  13  -5  15   10.39    5.33
  13   5 -15    3.85    4.28
  14  -5 -15    2.40    5.25
  14   5  15   12.42    4.62
  14  -5  15   15.77    5.73
   0  -5 -16    3.41    2.63
   0   5 -16   -1.90    1.99
   1  -5 -16   22.64    4.17
  -1   5 -16   19.32    4.09
  -1  -5 -16   17.07    3.67
   1   5 -16   28.92    5.03
   2  -5 -16    1.41    2.70
  -2   5 -16    0.30    2.28
   2   5 -16    1.75    2.69
  -2  -5 -16    1.01    2.51
   3  -5 -16    9.59    3.05
  -3  -5 -16    6.56    2.75
   3   5 -16    1.33    2.87
   4  -5 -16   20.50    4.14
   4   5 -16   16.85    4.08
   5  -5 -16    9.47    3.59
   5   5 -16    9.48    3.15
   6  -5 -16   17.74    4.21
   6   5 -16   12.35    3.78
   7  -5 -16  120.11   11.10
   7   5 -16  120.01   11.42
   8  -5 -16   39.06    6.63
   8   5 -16   38.64    6.57
   9  -5 -16    4.38    3.73
   9   5 -16   12.89    4.64
  10   5  16   23.49    4.86
  10  -5 -16   42.64    7.04
  10   5 -16   41.63    6.95
  11  -5 -16   -2.13    4.05
  11   5  16    5.49    3.80
  11  -5  16   10.84    4.93
  11   5 -16   11.00    4.61
  12   5  16    1.48    3.72
  12  -5 -16    3.02    4.18
  12  -5  16   -1.38    4.47
  12   5 -16    2.38    4.36
  13   5  16    4.58    4.37
  13  -5  16    2.33    4.96
  13   5 -16   -2.82    4.81
  14  -5 -16   16.39    6.11
  14   5 -16    8.04    4.98
   0  -5 -17    2.82    2.76
   0   5 -17   -1.36    2.38
   1  -5 -17   -1.07    2.54
  -1   5 -17    3.16    2.74
  -1  -5 -17   -3.21    2.20
   1   5 -17    1.57    2.46
   2  -5 -17   33.66    5.41
  -2   5 -17   25.00    4.77
   2   5 -17   40.37    5.96
  -2  -5 -17   39.37    5.18
   3  -5 -17   26.64    5.01
  -3  -5 -17   25.60    4.47
   3   5 -17   16.28    4.28
   4  -5 -17   88.61    8.67
   4   5 -17   80.51    9.13
   5  -5 -17  100.75    9.46
   5   5 -17   83.43    9.75
   6  -5 -17   64.80    7.46
   6   5 -17   41.31    6.63
   7  -5 -17    0.65    3.54
   7   5 -17    1.63    2.84
   8  -5 -17   18.45    4.75
   8   5 -17    5.83    4.03
   9  -5 -17    2.64    4.09
   9   5 -17   12.87    4.54
  10   5  17   44.25    6.49
  10  -5 -17   43.61    7.06
  11   5  17   30.80    5.76
  11  -5 -17   38.76    7.00
  11   5 -17   22.28    6.22
  12  -5 -17    3.42    4.66
  12   5  17   -5.58    3.84
  12  -5  17    3.02    4.75
  12   5 -17    3.99    4.62
  13   5  17   15.63    7.49
  13  -5 -17   11.34    5.81
  13  -5  17    3.39    5.62
  13   5 -17   16.44    5.68
   0   5 -18   -3.38    3.90
   0  -5 -18   -1.27    2.47
  -1   5 -18   -1.40    3.46
   1  -5 -18    4.52    3.16
  -1  -5 -18    6.16    2.86
   2  -5 -18   97.28    8.90
   2   5 -18   70.37    9.84
  -2  -5 -18   91.20    8.45
   3  -5 -18    0.43    2.74
  -3  -5 -18    4.95    2.77
   3   5 -18    5.67    2.72
   4  -5 -18   15.09    4.17
   4   5 -18   10.45    4.22
   5  -5 -18   30.25    6.29
   5   5 -18   30.77    5.85
   6  -5 -18   -0.81    3.18
   6   5 -18    0.18    2.86
   7  -5 -18   12.93    4.49
   7   5 -18   13.45    4.36
   8  -5 -18   -3.04    3.50
   8   5 -18   -1.68    3.46
   9  -5 -18    9.09    4.42
   9   5 -18   -0.49    4.02
  10  -5 -18    5.65    4.78
  10   5  18   13.03    4.43
  10   5 -18    6.45    4.27
  11  -5 -18    1.06    4.44
  11   5  18    6.42    4.11
  11   5 -18  -10.30    3.83
  12   5  18   -8.59    4.15
  12  -5 -18   -0.40    5.05
  12   5 -18    3.85    4.87
  12  -5  18   -1.10    5.09
   0   5 -19   -0.72    2.52
   0  -5 -19    1.50    3.01
  -1   5 -19    3.52    3.01
   1  -5 -19    7.68    3.73
  -1  -5 -19    6.92    3.26
   1   5 -19   -4.09    2.55
   2  -5 -19   28.93    5.41
   2   5 -19   26.02    5.54
  -2  -5 -19   28.72    4.90
   3  -5 -19    5.64    3.12
   3   5 -19    1.75    3.14
  -3  -5 -19   -4.69    2.45
   4  -5 -19   43.97   10.55
   4   5 -19   35.31    6.16
   5  -5 -19   23.24    5.42
   5   5 -19   19.21    5.01
   6  -5 -19    8.92    4.29
   6   5 -19    1.46    3.51
   7  -5 -19   24.28    5.83
   7   5 -19   26.32    6.12
   8  -5 -19    1.81    3.86
   8   5 -19   13.08    4.64
   9  -5 -19   26.68    5.85
   9   5 -19   16.64    5.31
  10   5  19   30.77    5.73
  10  -5 -19   27.02    6.78
  11  -5 -19   -3.66    5.04
  11   5  19   -4.30    4.48
  11   5 -19    7.03    5.08
   0  -5 -20    1.26    3.30
   0   5 -20   -2.72    3.01
   1  -5 -20   -2.11    3.08
  -1   5 -20    4.92    3.20
  -1  -5 -20   -4.88    2.90
   1   5 -20    1.92    2.94
  -2  -5 -20   24.36    4.67
   2   5 -20   19.10    4.60
   3  -5 -20   -3.72    3.44
   3   5 -20   -1.05    2.96
   4  -5 -20   73.90    8.97
   4   5 -20   74.01    9.00
   5  -5 -20   13.94    5.42
   5   5 -20    3.04    4.15
   6  -5 -20   -2.81    3.79
   6   5 -20    5.60    4.01
   7  -5 -20   10.32    4.95
   7   5 -20   11.12    5.01
   8  -5 -20    7.21    4.36
   8   5 -20    2.14    4.06
   9  -5 -20    2.99    5.51
   9   5 -20   12.66    5.64
  10  -5 -20   17.68    5.76
  10   5 -20   -2.44    4.67
   0  -5 -21   -8.44    2.97
   0   5 -21   -2.84    3.28
   1  -5 -21    8.37    4.28
  -1   5 -21    3.86    3.45
   1   5 -21   -1.04    3.44
   2  -5 -21    0.66    3.88
   2   5 -21    4.38    3.90
  -2  -5 -21    1.05    3.50
   3  -5 -21   -1.53    3.58
   3   5 -21   -1.60    3.62
   4  -5 -21    3.91    3.98
   4   5 -21    5.81    4.29
   5  -5 -21   10.66    4.63
   5   5 -21    8.58    4.51
   6  -5 -21   -1.55    4.43
   6   5 -21   -3.28    4.07
   7  -5 -21   -3.91    4.47
   8  -5 -21    4.10    5.03
   8   5 -21   -0.36    4.19
   9  -5 -21   -1.17    5.14
   9   5 -21    3.79    4.73
   0  -5 -22    7.04    3.92
   0   5 -22    1.05    3.99
  -1   5 -22   -1.44    3.77
   1  -5 -22   -3.25    3.93
   1   5 -22   -5.27    3.19
  -1  -5 -22    1.30    3.62
   2  -5 -22   53.05    7.69
  -2  -5 -22   39.17    6.65
   2   5 -22   50.65    7.76
   3  -5 -22    2.54    4.49
   3   5 -22    7.23    4.61
   4  -5 -22   -4.32    4.38
   4   5 -22    9.98    4.87
   5  -5 -22   -2.03    4.48
   6  -5 -22    8.73    5.43
   6   5 -22    2.44    4.47
   7   5 -22   14.74    5.98
   0  -5 -23    0.85    4.03
   0   5 -23   -1.08    4.36
   1  -5 -23    4.05    4.51
  -1  -5 -23    0.09    4.37
   2  -5 -23    8.63    4.91
  -2  -5 -23   15.22    4.68
   2   5 -23    9.50    6.00
   3  -5 -23    1.05    4.64
   3   5 -23   -1.22    4.47
   4  -5 -23    3.76    5.41
   4   5 -23    5.45    4.73
   5  -5 -23    6.32    5.67
   5   5 -23   -2.24    4.51
  -1  -6   0    0.69    0.55
   1  -6   0    0.25    0.98
   2  -6   0    3.97    1.51
  -2  -6   0    4.91    0.82
   2   6   0    4.58    0.79
   3   6   0   -0.61    0.53
  -3  -6   0   -0.09    0.62
   3  -6   0    1.55    1.60
   4  -6   0   15.17    2.96
   4   6   0   17.50    1.87
  -4  -6   0   16.61    1.84
  -5  -6   0    1.76    1.16
   5  -6   0    0.42    2.08
   5   6   0    1.38    1.03
   6   6   0   64.03    4.63
   6  -6   0   55.65    5.68
  -6  -6   0   58.16    4.63
   7   6   0    0.44    1.10
  -7  -6   0    1.68    1.32
   7  -6   0   -4.59    1.74
   8   6   0   11.61    2.05
  -8  -6   0   13.22    2.37
   8  -6   0    9.17    3.04
   9   6   0   -0.40    1.36
   9  -6   0    2.22    2.63
  -9  -6   0   -1.05    1.69
  10  -6   0   -2.22    2.35
  10   6   0   -1.12    1.39
  11   6   0    0.57    1.87
  11  -6   0    0.14    2.94
  12  -6   0    1.47    2.96
  12   6   0    4.01    2.15
  13   6   0    3.81    2.36
  13  -6   0    1.94    3.24
  14   6   0    4.46    2.81
  15  -6   0    5.55    3.86
  15   6   0    4.14    2.91
  16   6   0   14.57    3.85
  16  -6   0   19.68    5.71
  17   6   0    5.71    3.53
  17  -6   0    1.97    4.50
  18   6   0   -4.67    3.82
   0  -6   1   25.14    2.22
   0  -6  -1   24.48    2.19
   1  -6  -1  157.32    9.27
  -1  -6   1  139.10    9.09
  -1  -6  -1  132.94    8.80
   2  -6  -1  104.69    6.82
  -2  -6   1   93.95    6.37
   2   6  -1   93.74    6.35
   3   6   1    2.17    0.58
   3  -6  -1    1.91    1.61
  -3  -6   1    2.55    0.89
   3   6  -1    2.12    0.86
  -3   6   1    1.75    1.48
   3  -6   1    1.95    1.67
  -4  -6   1    0.44    0.84
   4  -6  -1    1.83    2.13
   4   6   1    2.25    0.71
   4   6  -1    1.14    1.00
  -4  -6  -1    2.49    0.88
  -4   6   1   -1.12    1.59
   4  -6   1    0.63    2.02
   5   6   1   96.34    6.80
   5  -6  -1  105.32    7.93
  -5  -6   1  108.75    7.02
   5   6  -1   98.59    7.06
  -5   6   1  102.52    7.85
  -5  -6  -1  104.10    6.84
   5  -6   1  112.77    8.09
   6  -6  -1 1372.94   80.14
   6   6   1 1279.47   79.14
  -6  -6   1 1343.05   79.34
   6   6  -1 1248.89   79.38
  -6  -6  -1 1343.95   79.15
   6  -6   1 1306.81   80.08
  -7  -6   1   40.18    4.08
   7   6   1   43.78    3.54
   7  -6  -1   40.29    4.56
   7   6  -1   32.19    3.48
  -7  -6  -1   42.22    3.61
   7  -6   1   32.18    4.45
  -8  -6   1   60.31    4.98
   8   6   1   54.32    4.62
   8  -6  -1   59.11    5.82
   8  -6   1   60.13    5.84
   8   6  -1   53.96    4.92
   9  -6  -1    7.52    2.79
   9   6   1    2.63    1.54
  -9  -6  -1    1.91    2.11
   9   6  -1    3.95    1.86
   9  -6   1    1.86    2.67
  10   6   1   45.79    4.84
  10  -6  -1   57.11    5.99
  10   6  -1   51.60    5.14
  10  -6   1   58.20    6.36
  11  -6  -1  108.00    9.51
  11   6   1  107.81    8.37
  11  -6   1  112.58    9.58
  11   6  -1  101.85    8.41
  12  -6  -1  188.90   14.44
  12   6   1  188.30   13.41
  12  -6   1  194.55   14.49
  13   6   1   39.31    5.00
  13  -6  -1   30.77    5.55
  13   6  -1   35.52    5.03
  13  -6   1   27.26    5.57
  14   6   1    3.11    2.36
  14   6  -1    0.76    2.78
  15   6   1   21.96    4.48
  15  -6  -1   24.61    5.26
  15  -6   1   18.63    5.18
  15   6  -1   29.18    4.78
  16  -6  -1    4.62    4.25
  16   6   1    4.90    3.11
  16  -6   1    1.66    4.07
  16   6  -1    1.70    2.94
  17   6   1    7.23    3.83
  17  -6  -1    8.52    5.20
  17   6  -1   13.02    4.91
  17  -6   1    2.01    4.58
  18   6   1  194.07   14.73
  18   6  -1  167.20   14.45
   0  -6  -2    1.02    0.75
   0  -6   2    2.26    0.86
  -1  -6   2   31.66    2.49
   1  -6  -2   24.05    2.45
  -1   6   2   28.68    2.54
   1   6  -2   33.24    2.51
  -1  -6  -2   20.66    1.95
  -2  -6   2    0.36    0.78
   2  -6  -2    0.58    1.14
  -2   6   2    0.13    1.13
   2   6  -2    0.77    0.65
  -3  -6   2    5.10    1.25
   3  -6  -2    3.13    1.82
  -3   6   2    8.20    2.02
   3   6  -2    7.22    1.46
  -4  -6   2   31.87    2.93
   4  -6  -2   30.49    3.75
  -4   6   2   29.46    3.67
   4  -6   2   30.55    3.99
   4   6  -2   36.97    3.13
  -5  -6   2    9.19    1.72
   5   6   2    7.53    1.17
   5  -6  -2    8.82    2.63
  -5   6   2    5.37    2.17
  -5  -6  -2    8.97    1.45
   5  -6   2    7.09    2.50
   5   6  -2    8.84    1.77
  -6  -6   2   30.71    3.34
   6  -6  -2   31.37    4.01
   6   6   2   27.74    2.62
   6  -6   2   26.02    3.90
   6   6  -2   30.62    3.10
  -6  -6  -2   33.24    2.89
   7  -6  -2   -1.43    1.76
  -7  -6   2    0.29    1.27
   7   6   2    4.33    1.18
  -7  -6  -2   -0.68    1.32
   7  -6   2   -2.27    1.81
   7   6  -2    0.80    1.33
   8   6   2    2.26    1.20
   8  -6  -2    2.89    2.16
  -8  -6   2    1.36    1.44
   8   6  -2    1.34    1.39
   8  -6   2    2.63    2.24
  -8  -6  -2   -0.79    1.56
   9  -6  -2   10.88    3.19
   9   6   2    1.76    1.60
  -9  -6  -2    6.11    2.01
   9   6  -2    5.58    1.87
   9  -6   2    7.81    3.93
  10   6   2    2.37    1.77
  10  -6  -2   -1.60    2.62
  10   6  -2   -0.37    1.83
  10  -6   2    3.13    3.09
  11  -6  -2    3.62    3.12
  11   6   2    4.45    2.00
  11  -6   2    2.60    3.07
  11   6  -2    4.69    2.31
  12  -6  -2    0.45    2.58
  12   6   2   -1.77    1.85
  12  -6   2   -1.98    2.87
  12   6  -2    2.35    2.21
  13   6   2    5.77    2.95
  13  -6  -2    4.84    3.48
  13   6  -2    3.97    2.53
  13  -6   2    7.43    3.46
  14   6   2    5.26    2.75
  14  -6  -2   -1.62    6.12
  14   6  -2    4.09    2.98
  15   6   2    2.01    2.87
  15  -6  -2    1.23    3.33
  15  -6   2   -2.00    4.17
  15   6  -2    3.16    2.69
  16  -6  -2    5.09    4.42
  16   6   2   10.49    3.62
  16  -6   2    2.54    3.57
  17  -6  -2   14.00    5.42
  17   6   2   10.53    4.03
  17   6  -2   20.00    4.93
  17  -6   2   17.27    5.67
  18   6   2    0.26    3.76
  18   6  -2   -1.32    3.55
  18  -6   2    5.77    8.05
   0   6   3  923.04   52.80
   0  -6  -3  885.16   52.77
   0  -6   3  822.07   53.19
   1   6   3  427.42   25.17
   1  -6  -3  405.94   25.56
  -1  -6   3  398.98   25.77
  -1  -6  -3  393.97   25.15
  -1   6   3  429.65   25.60
   1  -6   3  430.43   25.92
   1   6  -3  441.32   26.11
   2  -6  -3 1518.34   86.80
  -2  -6   3 1324.49   86.70
  -2   6   3 1477.99   86.75
   2   6  -3 1442.33   87.11
  -3  -6   3  234.56   15.62
   3  -6  -3  254.82   15.93
  -3   6   3  254.05   15.92
   3   6  -3  246.73   16.10
  -4  -6   3  687.70   44.35
   4  -6  -3  791.54   44.83
   4   6  -3  688.53   44.47
  -4   6   3  750.50   44.75
  -5  -6   3   11.45    2.19
   5   6   3    7.55    1.09
   5  -6  -3    4.62    2.16
   5  -6   3    6.48    2.44
   5   6  -3   11.22    2.10
   6  -6  -3   41.36    4.48
  -6  -6   3   40.44    3.85
   6   6   3   47.03    3.33
   6   6  -3   40.13    3.98
   6  -6   3   38.72    4.57
   7  -6  -3  246.03   17.49
   7   6   3  258.69   16.41
  -7  -6   3  271.40   17.00
   7  -6   3  266.43   17.76
   7   6  -3  266.94   17.14
   8   6   3   26.69    2.79
   8  -6  -3   21.03    3.85
   8   6  -3   24.51    3.54
   8  -6   3   34.68    4.79
   9  -6  -3  843.20   51.45
   9   6   3  803.78   50.18
   9   6  -3  807.48   50.89
   9  -6   3  840.79   51.48
  10  -6  -3   22.07    4.07
  10   6   3   16.27    2.80
  10   6  -3   18.73    3.40
  10  -6   3   21.41    4.59
  11   6   3   32.39    3.94
  11  -6  -3   27.59    5.05
  11   6  -3   29.82    4.90
  11  -6   3   23.68    4.95
  12   6   3   34.74    4.43
  12  -6  -3   22.34    4.65
  12   6  -3   38.94    5.23
  12  -6   3   40.26    6.08
  13  -6  -3  252.32   18.44
  13   6  -3  244.98   17.78
  13  -6   3  261.61   18.51
  14  -6  -3   61.80    7.40
  14   6   3   54.87    5.94
  14   6  -3   53.27    6.50
  15  -6  -3  142.53   12.82
  15   6   3  142.14   11.63
  15   6  -3  158.65   12.26
  15  -6   3  157.91   13.12
  16   6   3   60.73    6.41
  16  -6  -3   49.26    7.85
  16   6  -3   41.37    6.49
  16  -6   3   50.49    7.93
  17  -6  -3  178.62   15.70
  17   6   3  208.52   14.63
  17  -6   3  195.47   15.99
  17   6  -3  169.68   14.65
  18   6   3    0.59    3.52
  18  -6  -3    0.56    5.14
  18   6  -3    0.52    4.00
   0  -6  -4    5.69    1.24
   0  -6   4    9.62    1.80
   0   6  -4   10.80    1.77
   0   6   4    7.91    1.33
   1   6   4    8.48    1.17
  -1  -6   4   10.17    1.85
   1  -6  -4    7.47    1.53
   1   6  -4   11.54    1.99
  -1   6   4    9.39    1.61
  -1  -6  -4    8.39    1.11
   1  -6   4    6.34    2.11
  -2  -6   4    6.90    1.60
   2  -6  -4    1.94    1.53
   2   6  -4    6.05    1.60
   2  -6   4    5.36    1.61
  -2   6   4    8.37    1.79
   3  -6  -4    6.49    1.95
  -3  -6   4    5.19    1.47
   3   6  -4    4.38    1.57
   4  -6  -4   14.80    2.61
  -4  -6   4   14.27    2.29
   4   6  -4   15.92    2.43
  -4   6   4   15.71    2.80
   5  -6  -4    4.49    1.86
  -5  -6   4    1.28    1.29
   5   6   4    1.25    0.76
   5   6  -4    1.44    1.31
   6  -6  -4    1.52    1.89
   6   6   4    0.73    0.94
  -6  -6   4    1.50    1.20
   6  -6   4    3.40    2.17
   6   6  -4    2.05    1.42
   7   6   4    8.16    1.58
   7  -6  -4    7.75    2.53
   7   6  -4   10.28    2.23
   7  -6   4    7.30    2.63
   8   6   4    1.01    1.36
   8  -6  -4    3.44    2.56
   8   6  -4    0.20    1.26
   9   6   4    4.54    1.75
   9  -6  -4    1.71    2.46
   9   6  -4    5.31    1.96
   9  -6   4   -0.62    2.24
  10  -6  -4   -1.13    2.60
  10   6   4    0.47    1.55
  10   6  -4   -0.53    1.78
  10  -6   4   -2.14    2.56
  11  -6  -4   12.93    3.73
  11   6   4   15.67    2.96
  11  -6   4   15.80    4.27
  11   6  -4   12.25    3.31
  12  -6  -4   -1.43    2.95
  12   6   4    1.53    1.97
  12  -6   4   -0.10    3.06
  12   6  -4    1.10    2.26
  13   6   4   14.80    3.25
  13  -6  -4   24.97    4.60
  13  -6   4   16.50    4.51
  13   6  -4   21.83    4.10
  14   6   4   14.07    3.59
  14  -6  -4   18.58    4.62
  14  -6   4   16.68    5.59
  14   6  -4   21.43    4.28
  15   6   4    9.05    3.17
  15  -6  -4   -6.11    3.16
  15   6  -4   -0.24    2.89
  15  -6   4    7.64    4.00
  16  -6  -4   21.36    5.55
  16   6   4   16.49    4.10
  16   6  -4   13.17    4.17
  16  -6   4   20.16    5.59
  17  -6  -4   11.11    5.08
  17   6   4   -1.35    3.12
  17  -6   4   14.38    5.02
  17   6  -4    5.48    3.53
  18   6   4    0.95    3.61
  18  -6  -4    4.34    4.96
  18   6  -4   -6.56    4.07
   0   6  -5 3490.38  213.18
   0  -6  -5 3513.15  212.69
   0  -6   5 3498.93  213.26
   0   6   5 3726.35  212.66
   1   6   5  353.34   20.81
   1  -6  -5  347.50   21.25
  -1  -6   5  329.37   21.56
  -1   6   5  367.41   21.21
   1   6  -5  326.30   21.50
   1  -6   5  332.88   21.62
  -1  -6  -5  329.23   20.84
  -2  -6   5    0.06    1.07
   2  -6  -5   -0.07    1.19
   2   6   5    2.45    0.69
   2  -6   5    2.86    1.54
  -2  -6  -5    2.55    0.70
  -2   6   5    1.47    1.46
   2   6  -5    0.90    1.41
   3  -6  -5  670.53   42.33
  -3  -6   5  660.78   42.33
   3  -6   5  748.75   43.20
  -3   6   5  709.19   42.33
   3   6  -5  667.02   42.43
   4  -6  -5  169.67   10.84
  -4  -6   5  141.40   10.47
  -4   6   5  167.35   10.76
   4   6  -5  144.11   10.63
   5   6   5   36.26    2.83
   5   6   5   41.66    2.95
   5  -6  -5   33.67    4.04
  -5  -6   5   42.76    3.89
   5   6  -5   41.90    4.02
   6   6   5  353.85   23.27
   6   6   5  396.51   23.31
   6  -6  -5  399.06   24.63
   6   6  -5  378.51   24.40
   7   6   5   42.47    3.47
   7  -6  -5   41.22    4.71
   7  -6   5   41.24    4.95
   7   6  -5   42.75    4.50
   8   6   5  152.82   10.00
   8  -6  -5  153.39   12.16
   8  -6   5  151.62   11.58
   8   6  -5  146.02   10.94
   9   6   5  238.60   15.28
   9  -6  -5  260.86   16.92
   9   6  -5  216.61   16.19
   9  -6   5  234.55   16.88
  10  -6  -5  419.39   26.95
  10   6   5  397.59   25.37
  10  -6   5  396.99   26.81
  11   6   5  334.89   21.06
  11  -6  -5  350.40   24.82
  11  -6   5  300.78   22.29
  11   6  -5  327.85   22.07
  12  -6  -5   88.22    8.27
  12   6   5   77.95    6.76
  12  -6   5   72.06    8.41
  12   6  -5   81.99    7.89
  13  -6  -5   53.33    7.32
  13   6   5   39.82    5.01
  13  -6   5   45.17    6.82
  13   6  -5   40.67    5.95
  14  -6  -5   31.19    5.38
  14   6   5   29.98    4.62
  14  -6   5   28.39    6.16
  14   6  -5   33.94    5.59
  15   6   5   57.89    6.64
  15  -6  -5   60.28    8.28
  15   6  -5   53.89    7.14
  15  -6   5   53.02    7.88
  16   6   5   53.96    6.98
  16  -6  -5   65.12    9.24
  16   6  -5   73.86    7.99
  16  -6   5   63.62    8.86
  17  -6  -5   79.77   10.06
  17   6   5   72.12    7.75
  17   6  -5   57.56    7.82
  17  -6   5   79.45   10.18
  18   6   5   25.61    5.32
  18  -6  -5   27.57    6.85
  18  -6   5   23.40    8.31
  18   6  -5   39.42    6.67
   0   6  -6   19.89    2.72
   0   6   6   15.48    1.98
   0  -6  -6   13.20    2.07
   0  -6   6   18.28    2.60
   1   6   6   11.40    1.52
  -1  -6   6    9.20    2.17
   1  -6   6   10.94    2.22
   1   6  -6    9.46    2.06
  -1   6   6   10.82    1.87
  -1  -6  -6   14.71    1.79
   2  -6  -6    0.63    1.29
   2   6   6    1.78    0.85
  -2  -6   6    2.75    1.29
  -2  -6  -6    2.30    0.82
  -2   6   6   -0.13    1.41
   2   6  -6    3.63    1.56
   3  -6  -6    6.82    1.94
   3   6   6    9.73    1.25
  -3  -6   6    9.78    2.07
  -3   6   6    6.72    1.84
   3   6  -6    8.60    2.06
   4   6   6   19.80    1.79
   4  -6  -6   18.09    2.86
   4   6  -6   17.32    2.85
   5   6   6   23.70    2.00
   5  -6  -6   17.27    3.07
   5   6   6   17.29    2.05
   5   6  -6   21.71    3.26
   6  -6  -6    3.76    1.98
   6   6   6    3.37    1.14
   6   6   6    2.81    1.05
   6   6  -6    2.79    1.71
   7   6   6   -0.20    1.14
   7   6   6    0.31    0.94
   7  -6  -6   -2.85    1.64
   7  -6   6    1.80    2.25
   7   6  -6    1.51    1.57
   8   6   6    7.18    1.93
   8  -6  -6   11.92    3.21
   8   6  -6    8.70    2.23
   8  -6   6    7.45    3.11
   9   6   6   34.13    3.66
   9  -6  -6   33.93    5.06
   9   6  -6   38.51    5.40
   9  -6   6   29.50    5.33
  10  -6  -6    8.34    3.37
  10   6   6   11.02    2.30
  10  -6   6    9.98    3.25
  10   6  -6   11.74    3.00
  11   6   6   21.95    3.39
  11  -6  -6   20.48    4.19
  11  -6   6   20.82    4.77
  11   6  -6   21.34    4.14
  12  -6  -6   11.73    3.56
  12   6   6   11.46    2.73
  12  -6   6   19.13    4.82
  12   6  -6   12.79    3.62
  13   6   6    2.10    2.57
  13  -6  -6    1.37    3.89
  13  -6   6    2.66    3.48
  13   6  -6    1.43    2.62
  14  -6  -6   14.85    4.61
  14   6   6   14.85    3.49
  14   6  -6   11.04    3.58
  14  -6   6   16.55    5.00
  15  -6  -6   -0.40    3.15
  15   6   6   -2.55    2.79
  15  -6   6   -5.68    3.51
  16  -6  -6   -3.06    3.97
  16   6   6    2.11    3.23
  16   6  -6    3.97    3.20
  16  -6   6    4.96    4.26
  17   6   6   -2.05    3.68
  17  -6  -6    0.39    4.08
  17  -6   6   -6.95    4.37
  17   6  -6   -0.24    3.66
  18   6   6   -0.82    4.66
  18  -6  -6    8.71    4.78
  18  -6   6   -4.13    4.96
  18   6  -6    9.59    4.67
   0  -6  -7 1071.81   67.70
   0   6   7 1106.03   67.27
   0   6  -7 1167.66   67.96
  -1   6  -7  784.79   46.98
   1  -6  -7  760.31   46.58
   1   6   7  783.15   46.22
  -1  -6  -7  758.26   46.27
   1   6  -7  732.33   46.92
  -1   6   7  756.51   46.42
   2  -6  -7 1177.68   69.95
   2   6   7 1139.05   69.28
  -2  -6  -7 1133.57   69.29
   2   6  -7 1124.99   70.19
  -2   6   7 1182.97   69.78
   3  -6  -7  591.69   36.16
   3   6   7  591.81   35.31
  -3   6   7  575.49   35.96
   3   6  -7  566.35   36.27
   4  -6  -7  108.98    7.76
   4   6   7   96.07    6.59
   4   6  -7   93.38    7.58
   5   6   7  411.62   26.25
   5  -6  -7  480.68   27.62
   5   6  -7  400.13   27.36
   6  -6  -7   96.41    8.00
   6   6   7   96.51    6.73
   6   6   7  105.01    6.82
   6   6  -7   92.22    7.82
   7   6   7    0.59    1.16
   7  -6  -7    1.48    2.38
   7   6  -7    1.03    1.75
   8   6   7  973.70   58.05
   8  -6  -7  997.85   59.65
   8   6   7  887.83   58.04
   8   6  -7  959.77   59.52
   8  -6   7  975.16   59.63
   9   6   7   27.14    3.26
   9   6   7   21.22    2.89
   9  -6  -7   22.13    4.22
   9   6  -7   19.49    3.85
   9  -6   7   23.28    4.57
  10   6   7   48.34    4.94
  10  -6  -7   58.58    6.45
  10   6  -7   57.37    6.26
  10  -6   7   60.03    6.72
  11   6   7   13.09    2.83
  11  -6  -7   16.83    4.25
  11   6  -7   14.38    3.63
  11  -6   7   10.70    4.19
  12   6   7   27.03    3.93
  12  -6  -7   23.79    5.25
  12  -6   7   24.96    5.23
  12   6  -7   26.59    4.72
  13  -6  -7   28.19    5.77
  13   6   7   31.03    4.49
  13  -6   7   34.49    6.02
  13   6  -7   27.47    5.06
  14   6   7   25.33    4.16
  14  -6  -7   15.04    4.61
  14  -6   7   21.53    5.72
  14   6  -7   12.56    4.26
  15   6   7    5.82    3.42
  15  -6  -7    8.45    4.15
  15   6  -7    8.38    3.91
  15  -6   7   12.96    4.77
  16   6   7   16.29    4.27
  16  -6  -7    6.50    4.65
  16  -6   7   10.96    5.21
  16   6  -7   12.55    4.43
  17   6   7   14.65    4.43
  17   6  -7    7.76    4.66
  17  -6   7   11.83    5.06
   0   6   8    6.18    1.56
   0   6  -8    6.35    1.87
   0  -6  -8    8.64    1.85
   1   6   8   41.78    3.56
  -1   6  -8   39.61    4.13
   1  -6  -8   42.23    3.93
  -1   6   8   41.20    3.72
   1   6  -8   43.05    4.19
   2  -6  -8   36.38    3.79
   2   6   8   42.65    3.37
  -2  -6  -8   41.10    3.32
   2   6  -8   38.61    4.09
  -2   6   8   34.59    3.74
   3  -6  -8   62.47    5.45
   3   6   8   58.89    4.58
  -3  -6  -8   67.08    4.59
   3   6  -8   60.29    5.54
   4   6   8    6.68    1.43
   4  -6  -8    6.99    2.14
   4   6  -8    6.17    1.96
   5   6   8   58.68    4.60
   5  -6  -8   63.21    5.79
   5   6  -8   59.76    5.66
   6  -6  -8   52.44    5.64
   6   6   8   54.78    4.37
   6   6  -8   58.79    5.65
   7   6   8    9.83    2.00
   7   6   8    7.66    1.74
   7  -6  -8    6.22    2.77
   7   6  -8    5.97    2.47
   8   6   8   21.26    2.84
   8  -6  -8   16.26    3.83
   8  -6   8   24.91    4.63
   8   6  -8   22.74    3.87
   9  -6  -8   25.94    4.48
   9   6   8   22.30    2.93
   9   6   8   25.21    3.20
   9   6  -8   27.61    4.56
   9  -6   8   22.07    4.33
  10  -6  -8    2.08    2.85
  10   6   8    2.18    2.10
  10   6  -8    0.63    2.43
  10  -6   8    1.70    2.68
  11   6   8   14.77    2.79
  11  -6  -8   16.34    4.06
  11   6  -8    7.52    2.95
  11  -6   8   10.28    4.06
  12   6   8    5.51    2.61
  12  -6  -8    9.63    3.60
  12  -6   8   10.48    4.26
  12   6  -8    8.94    3.32
  13  -6  -8    1.95    3.42
  13   6   8    0.48    2.49
  13  -6   8    0.66    5.01
  13   6  -8   -0.09    2.84
  14   6   8    5.44    3.07
  14  -6  -8    4.51    3.51
  14  -6   8   10.57    5.05
  15   6   8    4.93    3.47
  15  -6  -8   11.41    4.67
  15  -6   8    7.97    4.69
  15   6  -8    1.36    3.51
  16  -6  -8   -2.59    3.83
  16   6   8   -4.86    2.89
  16   6  -8   -4.49    3.19
  16  -6   8   -7.69    4.23
  17   6   8   -4.62    3.70
  17  -6  -8    1.31    4.47
  17   6  -8    4.04    4.06
  17  -6   8   -7.23    5.01
   0   6  -9 3843.33  236.03
   0  -6  -9 3943.97  235.59
   0   6   9 4005.51  235.47
  -1   6  -9  164.96   12.07
   1  -6  -9  174.37   11.85
   1   6   9  182.92   11.54
  -1   6   9  173.21   11.67
  -1  -6  -9  182.19   11.63
   1   6  -9  164.51   12.14
   2   6   9   34.61    3.21
   2  -6  -9   36.51    3.83
   2   6  -9   30.68    4.15
  -2  -6  -9   34.48    3.25
   3  -6  -9   57.06    5.29
   3   6   9   57.80    4.54
   3   6  -9   57.10    5.38
   4  -6  -9  176.07   12.46
   4   6   9  170.76   11.46
   4   6  -9  180.73   12.67
   5  -6  -9  127.83    9.49
   5   6   9  119.77    8.33
   5   6  -9  117.66    9.48
   6   6   9   87.53    6.55
   6  -6  -9   99.26   10.63
   7   6   9  727.36   42.69
   7   6   9  642.59   44.22
   7  -6  -9  715.45   44.16
   7   6  -9  697.02   44.13
   8   6   9  168.36   10.92
   8  -6  -9  159.62   12.43
   8   6   9  145.84   10.87
   8   6  -9  169.06   12.48
   9   6   9    4.37    2.04
   9   6   9    0.13    1.79
   9  -6  -9    0.76    2.21
   9  -6   9    6.01    3.48
   9   6  -9    4.63    2.75
  10   6   9  222.03   14.64
  10  -6  -9  208.06   16.27
  10   6  -9  234.44   16.38
  10  -6   9  211.87   16.25
  11  -6  -9    2.10    2.59
  11   6   9    2.71    2.28
  11  -6   9    3.54    3.51
  11   6  -9    1.00    2.72
  12   6   9   41.22    4.60
  12   6  -9   27.38    5.22
  12  -6   9   27.38    5.53
  13  -6  -9   12.42    4.38
  13   6  -9   28.15    5.05
  14   6   9    4.41    2.80
  14  -6  -9   11.27    4.65
  14  -6   9    6.93    4.34
  14   6  -9   11.64    4.09
  15   6   9    4.88    3.07
  15  -6  -9   11.30    4.72
  15  -6   9    9.76    4.90
  15   6  -9    8.61    4.11
  16   6   9   13.52    3.80
  16  -6  -9    8.82    4.95
  16   6  -9    5.45    4.25
  16  -6   9   15.44    5.62
  17  -6  -9   19.36    6.00
  17   6   9   11.03    5.79
  17   6  -9    9.10    4.70
   0   6 -10  190.38   13.84
   0   6  10  200.08   13.32
   0  -6 -10  211.48   13.57
  -1   6 -10    7.61    2.30
   1  -6 -10   12.65    2.37
   1   6  10    8.97    2.06
  -1  -6 -10    9.70    2.03
   1   6 -10   13.77    2.85
   2  -6 -10   31.28    3.82
   2   6  10   32.61    3.53
  -2  -6 -10   29.17    3.17
   2   6 -10   33.20    4.45
   3  -6 -10    6.10    2.04
   3   6  10    7.69    2.28
  -3  -6 -10   10.05    1.81
   3   6 -10    7.98    2.46
   4   6  10   39.66    3.60
   4  -6 -10   31.81    4.59
   4   6 -10   45.43    6.27
   5   6  10   20.93    3.28
   5  -6 -10   24.90    3.92
   5   6 -10   20.78    3.90
   6  -6 -10   40.99    5.45
   6   6  10   39.39    4.59
   6   6 -10   47.32    5.29
   7  -6 -10    2.23    2.42
   7   6  10    4.63    1.87
   7   6  10    3.73    2.03
   7   6 -10    1.81    2.24
   8   6  10   10.24    2.40
   8   6  10    3.90    2.21
   8  -6 -10    9.73    3.21
   8   6 -10    8.56    2.84
   9   6  10   26.55    3.75
   9  -6 -10   31.33    5.61
   9   6 -10   30.34    4.79
   9  -6  10   35.31    6.01
  10  -6 -10    7.55    2.89
  10   6  10    6.83    2.51
  10  -6  10    3.94    3.68
  10   6 -10    5.28    2.72
  11  -6 -10    4.48    3.10
  11   6  10    1.10    2.42
  11   6 -10    2.86    2.72
  11  -6  10    3.28    3.41
  12  -6 -10   15.48    4.77
  12   6  10   18.73    3.55
  12   6 -10   15.42    4.21
  13   6  10    7.34    3.19
  13  -6 -10    8.46    3.66
  13   6 -10   13.70    4.01
  13  -6  10    4.18    3.91
  14  -6 -10   -1.59    3.78
  14   6  10    1.58    2.96
  14  -6  10    5.10    4.33
  14   6 -10   -1.44    3.10
  15   6  10    8.78    3.44
  15  -6 -10    5.77    4.80
  15  -6  10   12.96    4.74
  15   6 -10    4.70    3.60
  16   6  10    0.92    3.37
  16   6 -10   -0.51    4.40
  16  -6  10    2.72    4.62
  17  -6 -10   -4.62    4.91
  17   6 -10   -3.93    5.08
   0  -6 -11  220.87   14.84
   1   6  11  322.29   21.29
   1  -6 -11  335.94   21.72
  -1   6 -11  342.22   22.85
  -1  -6 -11  337.10   21.42
   2   6  11  838.15   51.90
   2  -6 -11  859.74   52.53
  -2  -6 -11  874.06   51.96
   2   6 -11  817.49   52.85
   3  -6 -11  137.50   10.66
   3   6  11  140.55    9.88
   3   6 -11  162.83   11.12
  -3  -6 -11  135.35    9.77
   4   6  11  766.13   48.27
   4  -6 -11  816.74   49.34
   4   6 -11  782.81   49.41
   5  -6 -11  149.42   11.33
   5   6  11  139.39   10.10
   5   6 -11  150.33   11.47
   6   6  11    3.58    2.01
   6  -6 -11   11.05    3.40
   6   6 -11    8.98    3.09
   7   6  11   84.02    7.06
   7  -6 -11  101.29    8.68
   7   6 -11   87.33    8.41
   8  -6 -11   13.35    4.14
   8   6  11   17.25    3.08
   8   6 -11   21.09    4.26
   9  -6 -11  240.74   17.65
   9   6  11  235.91   15.81
   9   6 -11  235.73   17.46
  10   6  11  109.88    8.57
  10  -6 -11  111.48   10.24
  10  -6  11  108.95   10.24
  10   6 -11  109.57    9.90
  11   6  11    5.67    2.91
  11  -6  11    9.49    4.14
  11   6 -11    7.72    3.41
  12  -6 -11   -4.08    2.98
  12   6  11   11.20    3.15
  12  -6  11    2.71    3.72
  13   6  11    1.80    3.11
  13  -6 -11   13.53    4.43
  13  -6  11    2.56    4.13
  13   6 -11    2.72    3.48
  14   6  11    8.88    3.57
  14  -6 -11    6.41    4.64
  14  -6  11   19.52    5.28
  14   6 -11   19.82    5.49
  15  -6 -11    6.22    4.59
  15   6  11    2.31    3.50
  15  -6  11   12.00    5.44
  15   6 -11    6.35    4.05
  16  -6 -11   13.19    5.66
  16  -6  11   23.40    6.81
  16   6 -11   15.72    5.31
   0   6 -12  186.93   13.92
   0  -6 -12  203.89   13.67
  -1   6 -12   11.20    2.90
   1  -6 -12   11.65    2.91
   1   6 -12   10.70    3.01
  -1  -6 -12   17.89    2.97
   2  -6 -12   48.23    5.10
   2   6 -12   46.34    5.25
  -2  -6 -12   49.14    4.61
   3   6  12    8.16    2.69
   3  -6 -12    8.36    2.73
  -3  -6 -12    7.54    2.10
   3   6 -12    4.13    2.53
   4   6  12    5.61    1.92
   4  -6 -12    6.01    2.82
   4   6 -12    8.07    2.74
   5  -6 -12    7.60    2.87
   5   6  12    4.18    2.31
   5   6 -12    2.78    2.60
   6  -6 -12   92.46    8.50
   6   6 -12   82.53    8.13
   7  -6 -12   13.64    3.64
   7   6 -12   11.41    3.61
   8  -6 -12    1.21    2.46
   8   6  12   -2.90    2.04
   8   6 -12   -1.20    2.34
   9   6  12    0.75    2.37
   9  -6 -12   -2.48    2.69
   9   6 -12    1.21    2.52
  10  -6 -12   20.43    4.50
  10   6  12   17.11    3.41
  10   6 -12   24.26    4.89
  10  -6  12   21.44    5.34
  11   6  12   -5.59    2.30
  11  -6 -12   -3.09    3.12
  11  -6  12   -5.05    4.24
  12   6  12    1.09    3.28
  12  -6 -12    3.88    3.61
  12  -6  12    6.25    3.74
  12   6 -12   -1.14    2.88
  13  -6 -12    1.59    3.81
  13   6  12   -5.70    2.65
  13  -6  12    1.56    3.80
  13   6 -12    2.11    3.29
  14   6  12    0.18    3.27
  14  -6 -12   -1.78    4.43
  14   6 -12   -3.09    3.43
  14  -6  12    1.30    4.55
  15  -6 -12   -4.28    4.66
  15   6  12   -3.56    3.27
  15  -6  12   -4.79    4.67
  15   6 -12    0.64    4.11
  16  -6 -12    2.99    5.12
  16  -6  12    5.23    7.71
   0   6 -13   35.45    5.10
   0  -6 -13   41.66    4.71
  -1   6 -13  332.03   21.05
   1  -6 -13  303.60   20.60
   1   6 -13  303.15   20.93
  -1  -6 -13  299.32   20.30
   2  -6 -13   43.00    4.92
  -2  -6 -13   40.24    4.37
   2   6 -13   31.51    5.04
   3  -6 -13  186.75   14.01
  -3  -6 -13  193.54   12.98
   3   6 -13  182.80   14.07
   4  -6 -13  168.94   12.13
   4   6 -13  138.40   11.80
   5  -6 -13   27.63    4.81
   5   6 -13   13.90    3.80
   6  -6 -13   31.70    5.15
   6   6 -13   25.86    4.90
   7  -6 -13    5.85    3.55
   7   6 -13    7.94    3.27
   8  -6 -13  105.31    9.68
   8   6 -13   94.40    9.51
   9   6  13   10.91    3.16
   9  -6 -13    4.11    3.47
   9   6 -13    8.92    4.02
  10   6  13   49.97    5.92
  10  -6 -13   59.93    9.90
  11  -6 -13   43.14    7.41
  11   6 -13   39.91    6.85
  11  -6  13   45.57    7.45
  12  -6 -13    6.92    4.35
  12   6  13   10.17    3.47
  12   6 -13    9.70    4.40
  12  -6  13   10.09    4.18
  13  -6 -13    0.74    4.03
  13   6  13    3.93    3.25
  13   6 -13   -6.16    3.15
  13  -6  13    2.85    4.16
  14   6  13   89.70    8.60
  14  -6 -13   93.66   10.59
  14   6 -13   93.41   10.32
  14  -6  13   75.74   10.36
  15  -6 -13   28.01    7.18
  15  -6  13   43.62    7.89
  15   6 -13   31.09    6.71
   0   6 -14   76.54    7.13
   0  -6 -14   71.59    6.81
   1  -6 -14   33.08    4.80
  -1   6 -14   42.24    4.92
  -1  -6 -14   36.58    4.69
   1   6 -14   26.81    4.57
   2  -6 -14   25.23    4.18
  -2  -6 -14   25.49    3.80
   2   6 -14   19.97    4.01
   3  -6 -14    2.65    2.45
  -3  -6 -14    1.97    1.98
   3   6 -14    2.72    2.62
   4  -6 -14   22.61    4.25
   4   6 -14   30.39    5.04
   5  -6 -14   41.07    5.92
   5   6 -14   29.03    5.05
   6  -6 -14    8.42    3.35
   6   6 -14    5.27    3.20
   7  -6 -14   18.17    4.27
   7   6 -14    9.17    3.91
   8  -6 -14    5.95    3.20
   8   6 -14    6.78    3.28
   9   6  14    6.74    3.01
   9  -6 -14    7.37    4.51
  10  -6 -14    2.05    3.56
  10   6 -14    0.84    2.93
  11   6  14   -0.17    3.19
  11  -6 -14    7.40    3.96
  11   6 -14    1.55    3.31
  11  -6  14    2.09    3.89
  12  -6 -14   -2.07    3.64
  12   6  14    4.00    3.40
  12  -6  14    6.80    4.19
  12   6 -14    1.07    3.12
  13  -6 -14    7.97    4.75
  13   6  14    1.43    3.36
  13   6 -14    1.34    3.61
  13  -6  14    1.85    4.54
  14   6  14    2.46    4.07
  14   6 -14    2.73    4.30
  14  -6  14   -5.08    4.39
  15  -6 -14   -0.07    5.05
  15   6 -14    5.84    5.04
  15  -6  14   -0.59    7.05
   0  -6 -15   19.91    4.40
   0   6 -15   18.20    3.98
  -1   6 -15   18.21    4.05
   1  -6 -15    9.38    3.28
  -1  -6 -15    6.27    2.77
   1   6 -15   13.07    3.30
   2  -6 -15    2.87    2.55
   2   6 -15    6.07    2.78
  -2  -6 -15    3.67    2.35
   3  -6 -15    3.85    3.02
   3   6 -15    9.89    3.33
  -3  -6 -15    3.47    2.42
   4  -6 -15  316.24   21.21
   4   6 -15  285.45   21.05
   5  -6 -15   75.09    7.81
   5   6 -15   71.69    7.88
   6  -6 -15   60.09    7.30
   6   6 -15   58.66    7.62
   7  -6 -15  400.07   27.69
   7   6 -15  406.66   28.03
   8  -6 -15   68.16    8.32
   8   6 -15   75.83    8.79
   9   6  15   77.63    9.59
   9  -6 -15   91.67    9.74
   9   6 -15   95.75    9.60
  10  -6 -15   41.85    7.24
  10   6  15   45.69    5.96
  10   6 -15   49.69    7.57
  11  -6 -15    6.91    4.75
  11   6  15    7.22    3.64
  11  -6  15   -2.47    3.54
  11   6 -15    6.73    3.93
  12  -6 -15    9.64    4.72
  12   6  15   -4.67    3.44
  12   6 -15   -0.65    3.48
  12  -6  15    4.90    4.34
  13   6  15   -3.18    3.66
  13  -6 -15    2.27    4.73
  13   6 -15   -3.05    3.83
  13  -6  15    0.13    4.53
  14  -6 -15    3.02    5.08
  14  -6  15    7.66    5.99
   0   6 -16    0.82    2.11
   0  -6 -16    0.85    2.36
  -1   6 -16   22.67    4.45
   1  -6 -16   28.04    4.62
   1   6 -16   27.89    4.77
  -1  -6 -16   29.61    4.61
   2  -6 -16    6.65    3.17
  -2  -6 -16    2.39    2.62
   2   6 -16    3.86    2.40
   3  -6 -16   -1.96    2.37
   3   6 -16   -2.17    2.21
   4  -6 -16    5.20    3.00
   4   6 -16    6.29    3.23
   5  -6 -16   16.20    4.12
   5   6 -16   14.92    4.12
   6  -6 -16   12.74    3.67
   7  -6 -16    7.08    3.95
   7   6 -16   11.50    4.19
   8  -6 -16   18.58    4.69
   8   6 -16    9.71    4.16
   9   6  16   -4.95    2.98
   9  -6 -16    3.27    3.37
   9   6 -16    4.03    3.07
  10  -6 -16    1.19    3.99
  10   6  16    6.97    3.77
  10   6 -16    8.48    4.33
  11   6  16    4.17    3.88
  11  -6 -16   15.92    5.41
  11  -6  16    1.48    4.98
  11   6 -16    9.21    4.55
  12   6  16   -2.67    3.84
  12  -6 -16    1.83    4.94
  12   6 -16    5.36    4.53
  12  -6  16    9.13    4.94
  13  -6 -16    0.76    5.28
  13  -6  16   -7.49    4.34
   0   6 -17    0.54    2.26
   0  -6 -17    1.50    2.58
  -1   6 -17   32.86    5.36
   1  -6 -17   19.46    4.55
   1   6 -17   37.04    5.50
  -1  -6 -17   30.01    4.62
   2  -6 -17   29.84    5.25
   2   6 -17   36.61    5.94
  -2  -6 -17   38.42    5.22
   3  -6 -17   -3.46    2.62
   3   6 -17    3.00    2.85
  -3  -6 -17    1.62    2.57
   4  -6 -17  211.54   16.23
   5  -6 -17   87.11    9.21
   5   6 -17   98.35    9.46
   6  -6 -17  125.33   11.37
   6   6 -17  120.43   11.33
   7  -6 -17   37.30    6.55
   7   6 -17   41.14    6.72
   8  -6 -17   14.07    4.40
   8   6 -17   20.20    5.27
   9  -6 -17  174.10   15.21
   9   6 -17  184.56   15.83
  10   6  17    4.78    3.67
  10  -6 -17    1.99    3.99
  10   6 -17    6.55    4.48
  11   6  17  127.24   10.37
  11  -6 -17  126.25   12.47
  11  -6  17   91.36   11.77
  11   6 -17   87.51   12.00
  12   6  17   14.97    6.48
  12  -6  17   24.63    6.68
  13  -6 -17  133.08   13.29
  13   6 -17  101.69   11.92
  13  -6  17   95.69   12.89
   0   6 -18    7.40    3.29
   0  -6 -18    8.49    3.49
  -1   6 -18   14.80    4.10
   1  -6 -18   14.78    3.96
   1   6 -18   13.92    3.82
  -1  -6 -18   14.46    3.90
   2  -6 -18   -1.50    2.64
   2   6 -18   -1.46    2.89
  -2  -6 -18    0.32    2.65
   3  -6 -18   -1.87    3.11
  -3  -6 -18    2.42    2.77
   3   6 -18    1.35    2.82
   4  -6 -18   18.36    4.15
   4   6 -18   14.17    4.49
   5  -6 -18   -6.72    3.16
   5   6 -18   -2.28    2.95
   6  -6 -18   -4.32    3.35
   6   6 -18    2.84    3.13
   7  -6 -18    9.84    3.80
   7   6 -18   -1.74    3.32
   8  -6 -18    6.37    4.15
   8   6 -18    5.94    4.04
   9  -6 -18   -2.38    3.52
   9   6 -18   -3.81    3.94
  10  -6 -18    5.86    4.80
  10   6  18   -5.23    3.88
  10   6 -18    6.97    4.53
  11  -6 -18   32.82    7.20
  11   6  18   24.85    5.25
  12  -6 -18   -6.21    4.95
  12   6 -18   -1.35    4.76
  12  -6  18   -2.31    7.48
   0  -6 -19    8.05    3.29
   0   6 -19    6.41    3.37
   1  -6 -19   -5.31    2.99
  -1   6 -19   -0.26    3.10
  -1  -6 -19    7.03    2.99
   1   6 -19    1.32    2.86
   2  -6 -19   58.19    7.67
  -2  -6 -19   59.80    6.87
   2   6 -19   61.92    8.43
   3  -6 -19   12.82    4.58
   3   6 -19   26.93    5.38
  -3  -6 -19   18.14    3.98
   4   6 -19   50.27    7.35
   5  -6 -19   81.42    9.45
   5   6 -19   88.81    9.67
   6  -6 -19  165.95   14.85
   6   6 -19  189.62   15.21
   7  -6 -19    5.33    4.16
   7   6 -19   14.59    4.64
   8  -6 -19   12.04    4.80
   8   6 -19   25.39    5.86
   9  -6 -19   29.93    5.93
   9   6 -19   30.12    6.31
  10   6  19   61.47    7.61
  10  -6 -19   42.46    8.38
  10   6 -19   57.70   14.23
  11  -6 -19   12.15    6.01
  11   6 -19   16.86    5.66
   0   6 -20    0.23    2.99
   0  -6 -20    2.43    3.00
  -1   6 -20    4.38    3.54
   1  -6 -20    2.11    3.32
  -1  -6 -20   -3.31    2.86
   1   6 -20    8.79    3.71
   2  -6 -20    1.87    5.89
  -2  -6 -20   -0.19    3.32
   2   6 -20   -0.64    3.05
   3  -6 -20   -5.57    3.50
   3   6 -20   -5.07    3.16
   4  -6 -20   -0.82    4.07
   4   6 -20    0.24    3.40
   5  -6 -20    5.37    4.39
   5   6 -20    7.64    4.38
   6  -6 -20    5.11    4.10
   6   6 -20   -0.53    3.66
   7  -6 -20    4.27    4.95
   7   6 -20    7.03    4.63
   8  -6 -20   -4.22    3.98
   8   6 -20    0.31    4.52
   9  -6 -20    1.14    4.88
   9   6 -20    2.23    4.16
  10  -6 -20    4.20    5.15
  10   6 -20    4.35    4.85
   0   6 -21   18.36    5.31
   1  -6 -21   -2.33    3.23
   1   6 -21    5.13    3.06
  -1  -6 -21    0.77    3.65
   2  -6 -21   20.07    5.43
   2   6 -21   32.13    6.23
  -2  -6 -21   21.23    4.86
   3  -6 -21   64.79    8.23
   3   6 -21   61.55    8.48
   4  -6 -21   52.93    7.41
   4   6 -21   41.22    7.42
   5  -6 -21    6.00    4.39
   5   6 -21    2.80    3.80
   6  -6 -21  199.99   17.05
   6   6 -21  192.41   17.55
   7  -6 -21   13.08    5.57
   7   6 -21   11.89    7.04
   8  -6 -21    9.33    6.76
   8   6 -21    8.03    5.21
   0  -6 -22   14.01    4.61
   0   6 -22    8.52    4.75
   1  -6 -22    4.29    4.41
   1   6 -22   -2.30    3.94
  -1  -6 -22    7.75    4.22
   2  -6 -22   -7.79    3.90
   2   6 -22    0.28    3.60
  -2  -6 -22    2.75    4.17
   3  -6 -22    7.27    4.06
   3   6 -22    4.43    4.49
   4  -6 -22    4.10    4.74
   5  -6 -22    9.38    5.44
   5   6 -22   -2.62    4.17
   6  -6 -22    6.09    5.14
   6   6 -22    3.35    4.46
   7   6 -22    4.30    5.42
   0  -6 -23   25.74    5.68
   0   6 -23   10.73    5.79
   1  -6 -23    6.69    4.66
  -1  -6 -23    7.37    4.84
   1   6 -23   10.03    4.89
   2  -6 -23   10.42    5.02
  -2  -6 -23    8.59    4.57
   2   6 -23   13.32    5.17
   3  -6 -23   15.45    6.02
   3   6 -23   25.20    6.06
   4  -6 -23  128.08   13.00
   4   6 -23  132.32   13.07
   1  -7   0    7.26    1.71
  -1  -7   0    5.23    1.09
  -2  -7   0    1.62    0.74
   2  -7   0    2.70    1.64
   3   7   0    3.56    0.98
   3  -7   0    3.23    1.98
  -3  -7   0    2.73    0.93
  -4  -7   0    0.78    0.91
   4   7   0    0.64    0.80
   4  -7   0    1.30    2.02
  -5  -7   0   93.82    6.09
   5   7   0   88.63    6.13
   5  -7   0   83.43    7.14
   6   7   0    0.07    0.87
  -6  -7   0    3.40    1.22
   6  -7   0   -2.08    1.78
   7   7   0  112.61    7.57
   7  -7   0  103.81    8.51
  -7  -7   0  105.76    7.47
   8   7   0    2.11    1.28
  -8  -7   0    2.42    1.50
   8  -7   0    1.88    2.41
   9  -7   0   46.38    5.56
  -9  -7   0   39.59    4.25
   9   7   0   42.28    4.09
  10  -7   0   -3.49    2.46
  10   7   0    3.17    1.91
  11   7   0   64.11    5.85
  11  -7   0   62.63    6.95
  12   7   0   -0.46    1.91
  12  -7   0    3.08    3.47
  13  -7   0    0.31    3.03
  13   7   0    0.17    2.26
  14   7   0   -1.25    2.41
  14  -7   0   -1.74    3.43
  15  -7   0    2.06    3.71
  15   7   0   -0.49    2.86
  16   7   0    0.96    2.95
  16  -7   0   -1.87    4.15
  17   7   0  192.43   14.74
  17  -7   0  182.79   16.04
  18  -7   0    8.43    5.23
  18   7   0   -3.13    3.69
   0  -7  -1    0.63    1.09
   0  -7   1    0.40    0.91
   1  -7  -1   10.16    1.82
  -1  -7   1   11.18    1.55
  -1  -7  -1   10.66    1.30
  -1  -7  -1    9.26    1.47
  -2  -7   1  121.36    7.79
   2  -7  -1  106.84    8.16
   2   7  -1  126.05    7.76
  -2  -7  -1  116.98    7.40
   3  -7  -1   77.63    6.18
  -3  -7   1   73.71    5.28
   3  -7   1   79.31    6.34
   3   7  -1   77.70    5.34
   4   7   1   43.63    3.07
   4  -7  -1   42.71    4.64
  -4  -7   1   43.53    3.41
   4   7  -1   44.57    3.52
   4  -7   1   37.64    4.42
  -4   7   1   45.98    4.46
  -4  -7  -1   42.06    3.08
  -5  -7   1  252.93   15.79
   5   7   1  265.46   15.61
   5  -7  -1  244.33   16.61
   5   7  -1  262.82   15.96
   5  -7   1  227.23   16.58
  -5  -7  -1  249.55   15.54
   6  -7  -1   -1.63    1.87
   6   7   1   -0.19    0.95
  -6  -7   1   -0.62    1.07
   6   7  -1    0.17    0.97
   6  -7   1   -1.14    1.80
  -6  -7  -1    1.09    1.16
   7   7   1   21.67    2.72
   7  -7  -1   19.35    3.67
   7   7  -1   23.09    2.65
   7  -7   1   21.78    3.69
  -7  -7  -1   19.85    2.58
  -8  -7   1    4.07    1.78
   8   7   1    6.10    1.57
   8  -7  -1    6.96    2.91
   8  -7   1    4.74    3.07
   8   7  -1    8.64    2.01
  -8  -7  -1    3.59    1.87
   9   7   1   36.59    3.71
   9  -7  -1   39.75    5.38
   9  -7   1   36.99    5.29
   9   7  -1   30.66    3.78
  -9  -7  -1   40.74    3.90
  10  -7  -1   13.72    3.69
  10   7   1   17.74    2.80
  10   7  -1   16.58    3.13
  10  -7   1   16.93    3.92
  11   7   1   11.35    2.63
  11  -7  -1   19.55    4.34
  11  -7   1   12.97    4.08
  11   7  -1   16.16    2.85
  12   7   1   11.70    2.60
  12  -7  -1   11.22    3.91
  12  -7   1    9.96    3.59
  12   7  -1    8.64    2.60
  13  -7  -1    3.52    3.54
  13  -7   1   -1.05    2.89
  13   7  -1    3.24    2.35
  14   7   1    6.17    2.68
  14  -7  -1   -0.19    3.40
  14  -7   1    8.38    3.94
  14   7  -1    1.55    2.63
  15  -7  -1    4.17    3.86
  15   7   1    2.12    2.85
  15   7  -1    3.69    2.98
  15  -7   1   -0.76    3.82
  16   7   1   33.05    4.89
  16  -7  -1   31.18    6.73
  16   7  -1   26.54    4.89
  16  -7   1   31.11    6.57
  17  -7  -1   59.98    8.41
  17   7   1   38.64    6.05
  17  -7   1   46.93    7.85
  18  -7  -1   32.31    7.21
  18   7   1   34.53    5.68
  18  -7   1   53.56    8.22
  18   7  -1   41.99    6.30
   0  -7   2    1.73    1.03
   0  -7  -2   -1.05    1.04
  -1  -7   2  139.76    9.32
   1  -7  -2  142.91    9.34
  -1  -7  -2  143.04    8.89
   2  -7  -2  492.44   31.89
  -2  -7   2  520.84   31.46
  -2   7   2  504.39   31.58
   2   7  -2  534.16   31.43
   3  -7  -2   30.34    3.63
  -3  -7   2   29.40    2.69
   3   7  -2   25.93    2.77
   4  -7  -2   30.74    3.79
  -4  -7   2   32.89    2.94
  -4   7   2   39.01    3.94
   4   7  -2   27.74    2.93
   4  -7   2   36.00    4.32
   5  -7  -2  739.53   44.77
   5   7   2  733.30   43.57
  -5  -7   2  724.82   44.10
   5   7  -2  730.31   44.24
   5  -7   2  691.16   44.79
   6  -7  -2   93.34    7.24
  -6  -7   2   83.20    6.61
   6   7   2   89.07    5.88
   6  -7   2   83.71    7.27
  -6  -7  -2   84.16    5.89
   6   7  -2   92.38    6.52
   7  -7  -2    4.09    2.21
   7   7   2    0.15    0.91
  -7  -7   2   -0.98    1.24
   7  -7   2    1.12    2.21
   7   7  -2    1.17    1.25
  -7  -7  -2   -0.06    1.26
   8  -7  -2   19.30    4.48
  -8  -7   2   29.05    3.50
   8   7   2   23.79    2.79
   8   7  -2   25.62    3.39
  -8  -7  -2   26.89    3.18
   9   7   2   27.63    3.26
   9  -7  -2   31.85    5.05
  -9  -7  -2   28.01    3.62
   9  -7   2   36.27    5.00
   9   7  -2   31.99    4.12
  10  -7  -2    3.96    3.20
  10   7   2    5.46    1.86
 -10  -7  -2    5.57    2.65
  10   7  -2    4.72    2.26
  10  -7   2   10.24    3.71
  11  -7  -2   16.88    3.95
  11   7   2   21.64    3.37
  11   7  -2   23.59    3.80
  11  -7   2   24.30    4.67
  12   7   2    5.73    2.30
  12  -7  -2    4.89    3.48
  12  -7   2    3.02    3.13
  12   7  -2    8.39    2.77
  13   7   2    3.70    2.25
  13  -7  -2    5.41    3.51
  13   7  -2    3.43    2.50
  13  -7   2    8.93    3.83
  14  -7  -2   71.96    7.93
  14   7   2   68.87    6.90
  14   7  -2   74.78    7.25
  14  -7   2   71.27    8.09
  15  -7  -2   33.19    6.62
  15   7   2   46.63    5.84
  15  -7   2   38.98    6.87
  15   7  -2   41.97    5.82
  16  -7  -2   43.47    7.01
  16   7   2   35.46    5.44
  16   7  -2   32.83    5.28
  16  -7   2   37.25    7.01
  17  -7  -2    4.85    5.05
  17   7   2    4.29    3.43
  17   7  -2    3.79    3.29
  17  -7   2   18.23    5.78
  18  -7  -2    2.94    5.55
  18   7   2    2.07    3.91
  18  -7   2   -5.95    4.37
  18   7  -2    4.41    4.29
   0  -7   3    0.45    1.04
   0   7   3    1.45    1.10
   0  -7  -3    0.40    0.94
   1  -7  -3   44.00    3.75
  -1  -7   3   47.32    3.79
   1   7  -3   46.29    3.77
  -1  -7  -3   40.51    3.03
  -1   7   3   42.84    3.69
  -2  -7   3  613.23   36.26
   2  -7  -3  564.66   36.19
   2   7  -3  598.49   36.19
  -2   7   3  587.02   36.21
  -3  -7   3    8.48    1.69
   3  -7  -3    7.46    2.07
  -3   7   3   10.82    2.54
   3   7  -3    8.28    1.74
  -4  -7   3    1.83    1.12
   4  -7  -3    2.99    2.01
  -4   7   3    3.00    1.78
   4   7  -3    2.17    1.32
   5  -7  -3  165.94   11.85
   5   7  -3  175.20   11.47
   5  -7   3  170.62   12.07
   6   7   3   52.54    3.73
   6  -7  -3   48.10    5.09
  -6  -7   3   52.94    4.48
   6   7  -3   55.34    4.69
   6  -7   3   58.32    5.43
  -7  -7   3   82.83    6.33
   7  -7  -3   70.89    6.93
   7   7   3   88.16    5.76
   7   7  -3   84.48    6.55
   7  -7   3   81.36    7.24
   8  -7   3  127.34   10.22
   8   7  -3  120.47    8.98
   9   7   3    8.68    1.87
   9  -7  -3    6.21    2.97
   9  -7   3    6.57    3.15
   9   7  -3   11.94    2.71
  10  -7  -3  114.64    9.65
  10   7   3  123.82    8.35
  10  -7   3  100.92    9.74
  10   7  -3  110.00    8.90
  11  -7  -3    1.88    3.04
  11   7   3    0.27    1.79
  11   7  -3    2.83    2.35
  11  -7   3    5.96    3.04
  12   7   3   13.21    2.89
  12  -7  -3   10.50    3.71
  12   7  -3   12.03    3.00
  12  -7   3   21.17    4.71
  13   7   3    4.01    2.24
  13  -7  -3    2.19    3.25
  13   7  -3    0.84    2.50
  13  -7   3   -0.55    3.21
  14   7   3   -0.53    2.17
  14  -7  -3    0.79    3.07
  14   7  -3    6.08    2.84
  14  -7   3    4.53    3.65
  15   7   3   63.17    6.92
  15  -7  -3   71.79    8.11
  15   7  -3   68.64    7.60
  15  -7   3   66.82    8.14
  16   7   3    9.67    3.58
  16  -7  -3   10.58    4.97
  16  -7   3    8.09    4.71
  16   7  -3   10.84    3.74
  17   7   3    0.93    3.18
  17  -7  -3   -3.71    4.18
  17  -7   3    6.46    5.24
  17   7  -3    3.83    3.47
  18  -7  -3   19.80    6.62
  18  -7   3   14.54    6.00
  18   7  -3   15.08    4.68
   0  -7  -4    0.78    0.99
   0   7   4   -0.70    1.13
   0  -7   4   -0.26    1.11
   1   7   4  349.83   20.72
   1  -7  -4  335.93   21.13
   1   7  -4  342.06   21.43
  -1   7   4  355.20   21.17
  -1  -7  -4  332.63   20.69
   1  -7   4  327.50   21.53
   2  -7  -4   10.39    1.99
   2  -7   4   10.15    2.05
  -2   7   4    8.96    2.05
   2   7  -4    6.84    1.69
   3  -7  -4    4.43    1.66
  -3  -7   4    0.67    1.26
  -3   7   4    0.72    1.61
   3   7  -4    0.92    1.28
   4  -7  -4   49.74    4.52
  -4  -7   4   48.68    4.12
   4   7  -4   47.31    4.14
  -4   7   4   39.58    4.49
  -5  -7   4   32.81    3.43
   5  -7  -4   45.64    4.29
   5   7  -4   35.63    3.69
   6  -7  -4   30.37    4.07
  -6  -7   4   25.08    3.29
   6   7   4   27.59    2.23
   6   7  -4   26.91    3.17
   6  -7   4   30.52    4.26
   7   7   4  524.27   31.49
   7  -7  -4  529.11   32.92
   7   7  -4  518.74   32.53
   7  -7   4  495.56   32.90
   8  -7  -4   60.79    5.85
   8   7   4   50.46    4.19
   8  -7   4   45.83    5.66
   8   7  -4   43.50    4.87
   9   7   4   20.13    2.67
   9  -7  -4   22.27    4.18
   9   7  -4   18.85    3.18
   9  -7   4   22.79    4.56
  10   7   4  262.52   15.94
  10  -7  -4  262.61   17.62
  10   7  -4  234.50   16.75
  10  -7   4  215.18   17.17
  11  -7  -4   25.82    4.96
  11   7   4   26.61    3.66
  11  -7   4   24.83    4.98
  11   7  -4   28.22    4.21
  12  -7  -4   -3.01    2.71
  12   7   4   -0.25    1.86
  12   7  -4   -1.16    2.20
  12  -7   4    3.19    3.54
  13   7   4    4.13    2.60
  13  -7  -4    6.39    3.37
  13   7  -4    0.80    2.76
  13  -7   4    5.98    4.19
  14   7   4   41.21    5.42
  14  -7  -4   42.23    6.68
  14   7  -4   44.30    5.82
  14  -7   4   38.75    7.07
  15   7   4   24.95    4.26
  15  -7  -4   19.21    5.16
  15   7  -4   23.28    4.51
  15  -7   4   13.53    5.20
  16   7   4   83.87    8.03
  16  -7  -4   87.52    9.63
  16  -7   4   73.10    9.64
  17  -7  -4  117.63   11.24
  17   7   4   69.90    8.54
  17   7  -4   98.73    9.55
  17  -7   4   87.75   10.32
  18  -7  -4   -5.98    4.89
  18   7  -4    0.06    4.00
  18  -7   4    7.75    5.24
   0   7  -5    0.72    1.40
   0  -7  -5    1.51    1.06
   0  -7   5    2.22    1.31
   0   7   5    0.96    1.05
   1  -7  -5  135.14    9.26
   1   7   5  136.31    8.85
  -1  -7   5  145.97    9.78
   1   7  -5  149.68    9.72
  -1   7   5  137.29    9.28
   1  -7   5  138.40    9.75
  -1  -7  -5  140.66    8.88
  -2  -7   5  175.07   11.15
   2  -7  -5  158.96   10.88
   2   7  -5  160.28   11.07
  -2   7   5  154.20   10.82
   2  -7   5  170.31   11.65
   3  -7  -5    2.22    1.51
  -3  -7   5    3.67    1.34
   3   7  -5    1.77    1.28
  -3   7   5    2.53    1.78
   4  -7  -5  170.89   12.38
  -4  -7   5  187.30   12.33
  -4   7   5  185.23   12.46
   4   7  -5  189.53   12.47
  -5  -7   5    4.02    1.84
   5  -7  -5    6.14    2.07
   5   7  -5    6.05    1.87
   6  -7  -5   14.63    2.90
   6   7  -5   11.41    2.36
   6  -7   5   12.94    3.32
   7  -7  -5  375.52   24.65
   7   7   5  375.19   23.16
   7  -7   5  366.06   25.53
   7   7  -5  394.95   24.49
   8   7   5   89.58    6.43
   8  -7  -5  107.00    8.30
   8  -7   5   86.47    8.26
   8   7  -5   87.41    7.51
   9  -7  -5   30.74    4.75
   9   7   5   27.77    3.02
   9  -7   5   35.14    5.35
   9   7  -5   22.87    3.89
  10   7   5    7.32    1.97
  10  -7  -5    8.32    3.21
  10  -7   5   10.55    3.82
  11  -7  -5   16.20    3.90
  11   7   5   14.19    2.63
  11   7  -5   14.22    3.49
  11  -7   5   18.28    4.75
  12   7   5   -1.64    1.86
  12  -7  -5   -1.11    2.84
  12  -7   5   -1.84    3.00
  12   7  -5   -3.09    1.99
  13  -7  -5    4.57    6.35
  13   7   5    5.57    2.60
  13  -7   5    9.86    3.98
  13   7  -5    4.78    2.91
  14   7   5    1.72    2.48
  14  -7  -5   -2.42    3.11
  14  -7   5    1.52    3.62
  14   7  -5    1.29    2.96
  15   7   5   -3.90    2.66
  15  -7  -5    1.99    3.66
  15   7  -5    0.55    2.98
  15  -7   5   -0.48    3.79
  16   7   5   -1.96    3.00
  16  -7  -5   -4.13    3.87
  16  -7   5    2.18    4.48
  16   7  -5    5.19    3.45
  17   7   5   55.25    6.33
  17  -7  -5   44.43    8.02
  17  -7   5   17.01    6.27
  17   7  -5   37.09    5.76
  18   7   5    5.56    6.38
  18  -7  -5    4.43    4.86
  18   7  -5    0.21    4.09
  18  -7   5   12.04    5.75
   0  -7  -6    1.29    1.01
   0   7  -6    2.16    1.54
   0   7   6    0.36    1.01
   0  -7   6   -1.99    1.23
  -1  -7   6  228.10   15.90
   1  -7  -6  243.58   15.69
   1   7   6  255.46   15.05
  -1   7   6  246.99   15.40
   1   7  -6  237.57   15.86
  -1  -7  -6  238.20   15.08
  -2  -7   6  334.16   22.59
   2  -7  -6  374.52   22.40
   2   7   6  365.85   21.54
   2   7  -6  335.76   22.53
  -2  -7  -6  356.50   21.56
   3  -7  -6  165.94   11.20
  -3   7   6  159.41   11.07
   3   7  -6  165.70   11.34
   4  -7  -6  142.49    9.82
   4   7  -6  129.93    9.71
   5  -7  -6  114.36    8.43
   5   7  -6  105.47    8.27
   6   7   6  288.91   17.33
   6   7   6  271.00   17.37
   6  -7  -6  293.81   18.92
   6   7  -6  279.42   18.73
   7   7   6  176.39   11.50
   7   7   6  179.93   11.46
   7  -7  -6  190.42   13.23
   7  -7   6  183.22   13.35
   7   7  -6  179.09   12.78
   8  -7  -6  571.61   36.58
   8   7   6  601.03   35.48
   8   7   6  534.83   34.96
   8  -7   6  581.87   36.77
   8   7  -6  581.79   36.43
   9  -7  -6   43.95    5.66
   9   7   6   32.13    3.38
   9   7  -6   38.59    5.65
   9  -7   6   30.52    5.44
  10  -7  -6   10.35    3.60
  10   7   6   12.21    2.29
  10  -7   6   10.30    3.91
  10   7  -6    5.08    2.67
  11  -7  -6   12.67    3.57
  11   7   6    5.96    2.05
  11   7  -6    7.54    2.88
  11  -7   6    3.71    3.14
  12  -7  -6    7.64    3.70
  12   7   6    4.45    2.14
  12  -7   6    3.96    3.97
  12   7  -6    7.61    2.72
  13   7   6   15.90    3.19
  13  -7  -6    6.75    3.81
  13   7  -6   11.77    3.58
  14  -7  -6    9.28    3.86
  14   7   6   -0.62    2.88
  14   7  -6    3.90    3.17
  14  -7   6    2.32    3.80
  15   7   6   27.12    4.51
  15  -7  -6   30.61    6.02
  15  -7   6   19.73    5.30
  16  -7  -6    8.13    4.78
  16   7   6    2.93    3.24
  16   7  -6   -1.41    3.03
  16  -7   6    0.56    4.99
  17   7   6   11.51    3.94
  17   7  -6    6.97    3.86
  17  -7   6    0.06    5.23
   0   7   7   -0.10    1.04
   0   7  -7    1.55    1.33
   0  -7  -7    0.09    0.98
   1  -7  -7   18.30    2.62
   1   7   7   22.99    2.28
  -1  -7  -7   22.09    2.30
  -1   7   7   22.52    2.57
   1   7  -7   24.88    3.20
   2  -7  -7  107.02    7.59
   2   7   7   99.25    6.74
   2   7  -7   99.56    7.76
  -2  -7  -7  105.76    6.81
  -2   7   7  102.59    7.42
   3  -7  -7  188.87   12.96
   3   7   7  189.96   11.99
   3   7  -7  200.41   13.26
  -3   7   7  192.53   12.88
   4  -7  -7    0.86    1.56
   4   7   7    2.21    0.74
   4   7  -7    1.43    1.49
   5  -7  -7  180.86   13.27
   5   7   7  196.42   12.03
   5   7   7  195.75   11.99
   5   7  -7  190.97   13.41
   6   7   7    0.75    1.03
   6   7   7    0.24    0.86
   6  -7  -7    1.06    1.77
   6   7  -7    1.68    1.67
   7   7   7   13.72    1.97
   7  -7  -7   16.33    3.92
   7   7   7   13.43    1.90
   7   7  -7   15.28    3.17
   8  -7  -7   25.80    4.38
   8   7   7   24.95    2.83
   8   7  -7   31.24    5.06
   8  -7   7   28.10    4.78
   9   7   7   57.88    4.87
   9   7   7   56.96    4.77
   9  -7  -7   61.95    6.82
   9   7  -7   60.25    6.31
   9  -7   7   63.08    6.79
  10   7   7   -0.68    1.36
  10   7   7    2.39    1.70
  10  -7  -7    3.60    3.03
  10  -7   7    1.75    2.85
  10   7  -7   -0.34    2.34
  11   7   7   16.38    2.95
  11  -7  -7   16.09    4.30
  11   7  -7   19.86    4.08
  11  -7   7   20.10    4.59
  12  -7  -7    5.26    3.32
  12   7   7    6.97    2.41
  12   7  -7   13.43    3.46
  12  -7   7    8.41    4.04
  13  -7  -7    8.68    3.76
  13   7   7   -1.19    2.08
  13   7  -7   -3.05    2.38
  13  -7   7    1.93    3.87
  14   7   7   -1.56    3.39
  14  -7  -7    0.90    3.64
  14  -7   7    4.60    3.93
  14   7  -7    3.54    3.27
  15   7   7    7.47    3.50
  15  -7  -7   19.57    5.01
  15  -7   7   14.16    5.28
  15   7  -7   13.94    4.02
  16  -7  -7    2.25    4.17
  16   7   7    4.24    3.42
  16   7  -7   -3.57    2.98
  16  -7   7   -4.33    4.45
  17  -7  -7   12.38    5.47
  17   7   7    9.23    4.81
  17  -7   7   11.67    6.99
  17   7  -7    7.70    4.29
   0   7  -8    0.48    1.32
   0   7   8   -1.81    0.98
   0  -7  -8   -1.72    1.07
   1  -7  -8  138.94    9.27
   1   7   8  137.67    8.84
   1   7  -8  129.00    9.60
  -1  -7  -8  125.49    8.90
  -1   7   8  133.02    9.12
   2  -7  -8  717.86   43.53
   2   7   8  695.18   42.78
   2   7  -8  704.90   43.86
  -2  -7  -8  701.89   42.83
  -2   7   8  708.68   43.32
   3   7   8  210.97   13.11
   3  -7  -8  218.99   14.17
   3   7  -8  192.59   14.17
   4   7   8   19.15    2.13
   4  -7  -8   23.18    3.40
   4   7  -8   20.28    3.32
   5   7   8  221.46   13.47
   5  -7  -8  221.74   14.92
   5   7  -8  193.54   14.68
   6   7   8  440.47   27.48
   6  -7  -8  469.14   29.04
   6   7   8  441.66   27.37
   6   7  -8  442.24   28.95
   7   7   8   69.98    5.34
   7   7   8   75.39    5.42
   7  -7  -8   77.84    7.24
   8   7   8   79.86    6.13
   8  -7  -8   93.65    7.97
   8   7   8   84.76    6.11
   8   7  -8   80.96    7.52
   8  -7   8   81.33    8.24
   9  -7  -8   31.65    5.31
   9   7   8   32.72    3.44
   9   7  -8   27.37    4.81
   9  -7   8   37.67    6.02
  10  -7  -8    5.59    3.25
  10   7   8    7.36    2.15
  10   7   8    9.71    2.19
  10   7  -8   10.78    3.34
  10  -7   8    9.90    3.50
  11   7   8   11.82    2.69
  11  -7  -8   11.29    3.93
  11  -7   8   18.01    4.63
  11   7  -8    9.64    3.47
  12   7   8    5.27    2.35
  12  -7  -8    6.50    4.11
  12  -7   8    8.55    4.23
  12   7  -8   12.10    3.91
  13  -7  -8   24.24    5.56
  13   7   8   27.80    3.98
  13   7  -8   27.48    4.98
  13  -7   8   33.69    6.26
  14  -7  -8   10.25    4.03
  14   7   8    4.37    3.15
  14  -7   8    7.17    4.09
  15   7   8    3.38    3.04
  15  -7  -8   -2.50    3.46
  15   7  -8    3.96    3.23
  15  -7   8    5.48    4.29
  16  -7  -8   -0.56    4.29
  16   7   8   -3.48    3.41
  16  -7   8    4.31    4.73
  16   7  -8    5.44    3.59
  17  -7  -8   51.03    8.64
  17   7  -8   33.63    6.43
  17  -7   8   37.49   10.47
   0  -7  -9    1.79    1.30
   0   7  -9   -1.23    1.24
   0   7   9   -0.08    1.09
   1  -7  -9   11.30    2.30
   1   7   9   11.02    1.85
  -1   7  -9   13.19    2.64
   1   7  -9   16.03    2.85
  -1   7   9   11.94    2.21
  -1  -7  -9   13.22    2.14
   2  -7  -9   41.76    4.28
   2   7   9   41.16    3.64
   2   7  -9   50.77    4.75
   3   7   9  107.14    7.38
   3  -7  -9  108.34    8.28
   3   7  -9  102.04    8.39
  -3  -7  -9  111.71    7.35
   4   7   9   24.32    2.58
   4  -7  -9   22.58    3.64
   4   7  -9   22.71    3.76
   5   7   9   -0.15    1.21
   5  -7  -9    0.69    2.04
   5   7  -9    0.11    1.51
   6  -7  -9   24.78    5.66
   6   7   9   38.28    3.61
   6   7   9   33.12    3.22
   6   7  -9   42.15    5.24
   7   7   9  202.78   13.34
   7  -7  -9  215.37   15.12
   7   7   9  199.83   13.26
   7   7  -9  209.63   14.97
   8   7   9   10.11    2.09
   8  -7  -9    7.09    3.01
   8   7   9    8.53    1.93
   8   7  -9    6.60    2.83
   9   7   9    5.89    2.04
   9  -7  -9    7.49    2.95
   9   7   9    8.12    2.09
   9  -7   9   10.24    3.38
   9   7  -9   10.11    3.12
  10   7   9    3.90    2.00
  10  -7  -9   -1.12    2.70
  10   7   9    0.05    2.03
  10  -7   9    3.34    3.43
  10   7  -9    3.07    2.58
  11  -7  -9    7.04    3.71
  11   7   9    3.32    2.29
  11  -7   9    7.57    3.91
  11   7  -9    6.83    3.03
  12  -7  -9    2.56    3.17
  12   7   9   -2.34    2.07
  12   7  -9   -2.62    2.36
  13  -7  -9   18.14    4.76
  13   7   9   21.88    3.66
  13  -7   9   21.88    5.52
  13   7  -9   27.76    5.41
  14  -7  -9   13.68    4.48
  14   7   9   10.78    3.08
  14  -7   9    5.48    4.33
  14   7  -9    3.42    3.47
  15   7   9   -1.93    2.98
  15  -7  -9   10.85    4.49
  15  -7   9    2.66    4.38
  15   7  -9    1.93    3.56
  16  -7  -9   12.81    8.95
  16   7   9   12.96    5.08
  16   7  -9    4.33    4.33
  16  -7   9   11.41    5.42
  17  -7  -9   11.82    5.51
  17   7  -9   17.78    5.64
  17  -7   9   23.72    6.56
   0   7 -10   -0.75    1.35
   0  -7 -10    0.51    1.33
   0   7  10   -2.12    1.30
  -1   7 -10   10.08    2.46
   1  -7 -10    8.19    2.22
   1   7  10    3.12    1.72
  -1  -7 -10    6.15    1.90
  -1   7  10    6.77    2.25
   1   7 -10    5.10    2.09
   2   7  10   72.38    5.89
   2  -7 -10   82.33    6.64
  -2  -7 -10   77.56    5.91
   2   7 -10   81.64    6.84
   3  -7 -10  292.70   18.44
   3   7  10  273.64   17.36
  -3  -7 -10  276.38   17.32
   3   7 -10  244.08   19.22
   4   7  10   22.82    2.81
   4  -7 -10   22.20    3.88
   4   7 -10   19.04    3.90
   5   7  10   39.00    3.72
   5  -7 -10   40.90    5.27
   5   7 -10   47.10    5.31
   6  -7 -10  174.89   12.74
   6   7  10  173.70   11.27
   6   7 -10  154.90   12.54
   7   7  10   55.15    4.73
   7  -7 -10   54.16    6.42
   7   7  10   52.13    4.58
   7   7 -10   45.29    6.30
   8  -7 -10   71.42    7.28
   8   7  10   63.19    5.59
   8   7  10   65.86    5.43
   8   7 -10   74.37    7.20
   9   7  10   21.12    3.14
   9   7  10   20.70    3.02
   9  -7 -10   17.93    4.34
   9   7 -10   21.71    4.42
   9  -7  10   19.44    4.35
  10  -7 -10    8.84    3.63
  10   7  10    1.54    1.93
  10   7  10    7.81    4.20
  10  -7  10    7.02    3.59
  10   7 -10    8.72    3.22
  11  -7 -10    2.07    3.19
  11   7  10    1.98    2.19
  11  -7  10    0.74    3.25
  11   7 -10    2.63    3.21
  12  -7 -10   53.51    7.84
  12   7  10   49.03    5.32
  12   7 -10   61.38    7.32
  12  -7  10   51.28    7.70
  13   7  10   -4.11    2.36
  13  -7 -10    6.51    4.18
  13  -7  10   -3.40    3.49
  13   7 -10    2.89    3.52
  14   7  10    8.71    3.22
  14  -7 -10    9.27    4.49
  14   7 -10    5.86    3.92
  14  -7  10    7.40    4.78
  15  -7 -10   46.94    7.73
  15   7  10   37.31    5.15
  15  -7  10   30.73    7.06
  15   7 -10   27.44    5.70
  16  -7 -10   33.16    7.20
  16   7 -10   26.25    6.21
  16  -7  10   34.72    7.14
   0   7 -11   -0.97    1.47
   0  -7 -11    3.43    1.74
   1  -7 -11    1.30    1.83
  -1   7 -11   -1.50    1.66
   1   7  11   -2.51    1.47
   1   7 -11    0.90    1.57
  -1  -7 -11    2.42    1.72
   2   7  11  176.02   12.18
   2  -7 -11  181.73   12.87
  -2  -7 -11  187.51   12.29
   2   7 -11  187.84   13.32
   3   7  11    4.50    1.84
   3  -7 -11    2.33    1.93
  -3  -7 -11    0.74    1.34
   3   7 -11    0.37    1.78
   4  -7 -11    5.87    2.75
   4   7  11    9.49    2.81
   4   7 -11    9.58    2.83
   5  -7 -11  242.55   17.41
   5   7 -11  257.35   17.69
   6  -7 -11   11.84    3.23
   6   7  11    7.60    2.70
   6   7 -11    8.52    3.19
   7  -7 -11    3.29    2.73
   7   7  11    5.04    1.98
   7   7  11    2.74    1.97
   7   7 -11    4.60    2.61
   8   7  11   16.35    2.98
   8   7  11   16.32    2.92
   8  -7 -11   22.34    4.79
   8   7 -11   21.43    4.32
   9   7  11    1.22    2.24
   9   7  11   -2.44    1.91
   9  -7 -11   -0.68    2.40
   9   7 -11    0.13    2.56
  10   7  11   11.87    2.86
  10  -7 -11   11.03    3.95
  10  -7  11   17.73    4.78
  10   7 -11   20.75    4.17
  11   7  11    3.55    2.46
  11  -7 -11    6.03    3.92
  11   7 -11    7.07    3.54
  12  -7 -11   18.16    4.84
  12   7  11   14.69    3.27
  12   7 -11    7.04    4.39
  12  -7  11   21.72    4.98
  13  -7 -11   -0.29    3.95
  13   7  11   -5.04    2.60
  13  -7  11   -0.55    3.39
  13   7 -11    1.26    3.64
  14   7  11    6.64    3.41
  14  -7 -11   10.49    4.81
  14   7 -11    9.29    4.09
  14  -7  11    7.04    4.61
  15  -7 -11   30.76    7.50
  15  -7  11   25.73    7.05
  15   7 -11   28.99    6.31
  16  -7 -11    9.64    5.82
  16   7 -11    5.62    4.96
  16  -7  11   14.00    7.87
   0   7 -12   -0.80    2.01
   0  -7 -12    1.89    1.99
  -1   7 -12   21.97    4.14
   1  -7 -12   32.06    4.32
   1   7 -12   32.92    4.73
  -1  -7 -12   33.72    3.82
   2   7  12   -0.12    1.67
   2  -7 -12    0.72    2.20
   2   7 -12    0.30    1.99
  -2  -7 -12   -0.73    1.57
   3   7  12  148.01   10.26
   3  -7 -12  147.38   11.10
   3   7 -12  136.90   11.32
  -3  -7 -12  150.38   10.20
   4   7  12   59.19    5.39
   4  -7 -12   64.15    6.47
   4   7 -12   65.29    6.63
   5  -7 -12  142.75   11.05
   5   7  12  136.43    9.57
   5   7 -12  125.22   10.75
   6  -7 -12   14.60    3.44
   6   7  12   11.44    2.40
   6   7 -12   11.54    3.27
   7  -7 -12   73.78    7.65
   7   7  12   63.64    5.94
   7   7 -12   69.35    7.30
   8  -7 -12    9.75    3.42
   8   7  12    8.29    2.40
   8   7  12    4.31    2.76
   8   7 -12    5.80    3.27
   9  -7 -12    1.52    3.01
   9   7  12    1.77    2.55
   9   7 -12    3.44    2.70
  10   7  12    0.23    2.30
  10  -7 -12   -0.86    2.95
  10   7 -12    1.75    2.80
  10  -7  12    1.54    3.70
  11  -7 -12   18.83    4.89
  11   7  12   12.61    3.14
  11  -7  12   14.51    4.73
  11   7 -12   19.52    7.03
  12  -7 -12    7.01    3.97
  12   7  12    6.10    2.87
  12  -7  12    3.55    3.87
  12   7 -12    9.94    4.05
  13  -7 -12    1.16    4.08
  13   7 -12    2.55    3.70
  13  -7  12    3.28    4.15
  14  -7 -12   29.48    6.39
  14   7  12   11.84    3.86
  14  -7  12   18.00    5.62
  14   7 -12   27.16    6.03
  15  -7 -12   94.80   17.39
  15  -7  12   84.04   10.98
  15   7 -12   84.38   10.20
   0  -7 -13    1.61    2.04
   0   7 -13   -0.77    1.91
  -1   7 -13   17.95    3.84
   1  -7 -13   20.23    3.67
  -1  -7 -13   25.21    3.56
   1   7 -13   15.52    3.56
   2  -7 -13   14.71    3.23
  -2  -7 -13   15.78    3.00
   2   7 -13   13.71    3.35
   3  -7 -13   43.00    5.90
   3   7 -13   34.59    4.99
  -3  -7 -13   35.68    4.13
   4  -7 -13   44.30    6.15
   4   7 -13   59.99    6.38
   5  -7 -13    9.40    3.23
   5   7 -13   10.67    3.28
   6  -7 -13   -1.17    2.92
   6   7 -13    1.22    2.46
   7  -7 -13   33.74    5.84
   7   7 -13   35.26    5.63
   8  -7 -13   13.69    3.67
   8   7  13   16.14    3.07
   8   7 -13   14.24    4.01
   9  -7 -13    6.67    3.37
   9   7  13    2.20    2.10
   9   7 -13    0.01    2.72
  10  -7 -13    1.50    3.45
  10   7  13    0.46    2.45
  10  -7  13    2.14    3.78
  11   7  13    9.19    3.02
  11  -7 -13   11.65    4.18
  11  -7  13   16.15    4.67
  11   7 -13    9.91    4.06
  12  -7 -13   -0.34    3.64
  12   7  13   -1.11    2.85
  12   7 -13   -2.87    2.92
  12  -7  13    2.70    3.72
  13  -7 -13    4.50    4.46
  13   7  13    0.05    3.02
  13   7 -13   10.06    3.92
  13  -7  13    2.15    4.01
  14  -7 -13   28.49    6.16
  14  -7  13   40.38    7.22
  14   7 -13   26.83    6.35
  15  -7 -13   12.68    5.38
  15   7 -13    9.27    5.36
   0   7 -14   -1.68    1.78
   0  -7 -14   -2.44    1.84
   1  -7 -14   69.00    6.51
  -1   7 -14   63.33    6.58
   1   7 -14   60.93    6.58
  -1  -7 -14   65.43    6.18
   2  -7 -14   25.33    4.73
   2   7 -14   32.55    4.86
  -2  -7 -14   34.62    4.36
   3  -7 -14   64.58    6.58
  -3  -7 -14   63.07    5.88
   3   7 -14   63.56    6.87
   4  -7 -14   41.40    5.97
   4   7 -14   42.46    6.20
   5  -7 -14   26.23    4.76
   5   7 -14   39.63    5.58
   6  -7 -14   18.97    4.51
   6   7 -14   24.35    4.71
   7  -7 -14    7.49    3.66
   7   7 -14   -0.67    2.74
   8  -7 -14   -7.46    2.84
   8   7 -14    0.65    2.68
   9   7  14    4.00    2.74
   9   7 -14    3.36    3.33
  10   7  14    8.28    3.18
  10  -7 -14    8.93    3.87
  10   7 -14    6.44    4.09
  11   7  14    0.07    2.88
  11  -7 -14    0.87    3.68
  11  -7  14    5.51    4.00
  11   7 -14    5.09    3.52
  12  -7 -14    6.03    3.94
  12   7  14    2.90    3.36
  12  -7  14    0.66    3.86
  12   7 -14    1.60    3.47
  13   7  14    5.56    4.89
  13  -7 -14   13.21    5.13
  13   7 -14   17.59    5.41
  13  -7  14   10.63    5.10
  14  -7 -14   14.03    7.64
  14  -7  14   16.39    5.92
  14   7 -14    4.95    4.89
   0   7 -15    1.87    2.07
  -1   7 -15    0.37    2.08
   1  -7 -15    4.29    2.70
   1   7 -15    1.59    2.22
  -1  -7 -15   -2.15    2.19
   2  -7 -15    6.45    2.84
  -2  -7 -15    3.60    2.27
   2   7 -15    0.17    2.22
   3  -7 -15    5.49    2.85
  -3  -7 -15    7.69    2.39
   3   7 -15   16.69    3.83
   4  -7 -15    3.37    2.56
   4   7 -15    0.62    2.26
   5  -7 -15  179.95   13.82
   5   7 -15  168.51   13.70
   6  -7 -15    9.69    3.69
   6   7 -15   15.04    3.98
   7  -7 -15   11.04    4.11
   7   7 -15    4.52    3.63
   8  -7 -15   22.77    6.06
   8   7 -15   19.29    5.18
   9   7  15    6.73    3.17
   9  -7 -15    6.58    4.12
   9   7 -15    6.01    3.48
  10  -7 -15   -0.24    4.04
  10   7  15    5.88    3.34
  10   7 -15    1.71    3.64
  11  -7 -15    2.84    4.28
  11   7  15   11.00    3.74
  11   7 -15    8.95    4.20
  11  -7  15    1.57    4.02
  12   7  15    0.96    3.42
  12  -7 -15   -2.11    4.52
  12   7 -15    0.97    4.08
  12  -7  15   -3.70    4.21
  13  -7 -15   -0.36    4.91
  13  -7  15   -2.10    4.12
  13   7 -15    3.53    4.15
  14  -7 -15    0.85    4.80
  14   7 -15    3.27    5.21
  14  -7  15    7.89    6.25
   0   7 -16   -0.99    2.22
   0  -7 -16    1.19    2.27
  -1   7 -16    1.04    2.40
   1  -7 -16    2.93    2.75
  -1  -7 -16    3.54    2.51
   1   7 -16   -0.28    2.43
   2  -7 -16   66.95    7.40
   2   7 -16   71.73    7.48
   3  -7 -16    3.93    3.17
   3   7 -16   10.00    3.43
  -3  -7 -16    8.46    3.05
   4  -7 -16  149.34   11.90
   4   7 -16  133.00   11.90
   5  -7 -16  140.12   11.45
   5   7 -16  116.10   12.04
   6  -7 -16   61.08    7.69
   6   7 -16   74.50    8.07
   7  -7 -16   69.10    8.37
   7   7 -16   69.41    8.15
   8  -7 -16   17.35    4.59
   8   7 -16    8.59    4.13
   9  -7 -16    9.61    4.47
   9   7  16   10.94    4.91
   9   7 -16   20.30    5.35
  10   7  16   14.45    4.14
  10  -7 -16    8.51    5.05
  10   7 -16   18.48    4.82
  11   7  16   10.11    3.79
  11  -7 -16    1.59    4.51
  11   7 -16    5.02    4.05
  11  -7  16   -2.72    4.36
  12  -7 -16    6.13    4.55
  12  -7  16    4.26    4.65
  12   7 -16   -2.89    3.82
  13  -7 -16    3.30    4.84
  13   7 -16   -2.68    7.26
   0   7 -17    1.78    2.88
   0  -7 -17   -2.03    2.63
  -1   7 -17   -4.87    2.18
   1  -7 -17   -1.57    2.37
   1   7 -17   -1.20    2.41
  -1  -7 -17   -1.90    2.67
   2  -7 -17    5.67    3.41
   2   7 -17    7.07    4.39
  -2  -7 -17    4.25    2.86
   3  -7 -17   60.17    7.27
  -3  -7 -17   77.11    6.94
   3   7 -17   51.72    9.43
   4  -7 -17   42.29    6.91
   4   7 -17   60.30    6.80
   5  -7 -17   16.03    4.54
   5   7 -17   12.08    4.57
   6  -7 -17   57.50    8.02
   6   7 -17   61.13    8.31
   7  -7 -17    7.78    3.90
   7   7 -17    9.19    4.08
   8  -7 -17   18.33    5.21
   8   7 -17   22.01    5.42
   9   7  17   59.60    6.92
   9  -7 -17   49.44    7.77
   9   7 -17   62.71    8.67
  10  -7 -17   10.41    4.57
  10   7  17    9.33    4.16
  10   7 -17    8.67    4.48
  11  -7 -17   22.86    6.55
  11  -7  17   21.92    6.52
  11   7 -17   18.89    5.95
  12  -7 -17    0.14    9.33
  12   7 -17   -0.73    7.10
  12  -7  17   -5.77    5.27
   0   7 -18    0.71    2.71
   0  -7 -18    0.55    2.62
   1  -7 -18   61.84    6.90
  -1   7 -18   60.34    7.15
   1   7 -18   45.96    7.19
  -1  -7 -18   58.51    6.73
   2  -7 -18   19.08    4.12
   2   7 -18   14.90    4.47
  -2  -7 -18   19.39    4.26
   3  -7 -18   14.79    4.44
   3   7 -18   15.27    4.41
  -3  -7 -18   19.03    4.07
   4  -7 -18   18.25    4.82
   4   7 -18   16.93    4.39
   5  -7 -18   70.26   10.42
   5   7 -18   74.48    8.73
   6  -7 -18    7.70    3.85
   6   7 -18    2.50    3.38
   7  -7 -18  215.66   16.67
   7   7 -18  188.15   16.31
   8  -7 -18   42.21    7.11
   8   7 -18   36.13    7.03
   9   7  18    6.57    4.42
   9  -7 -18   14.38    5.42
   9   7 -18    7.72    4.64
  10   7  18  129.82   12.62
  10  -7 -18  148.23   13.53
  10   7 -18  138.46   13.41
  11   7 -18    6.07    5.96
   0  -7 -19   -5.33    2.80
   0   7 -19   -2.12    2.61
   1  -7 -19   26.87    4.88
  -1   7 -19   30.56    5.28
  -1  -7 -19   39.92    5.68
   1   7 -19   29.71    5.53
   2  -7 -19    3.95    3.53
   2   7 -19    7.08    3.36
  -2  -7 -19   10.61    3.57
   3  -7 -19   -1.53    3.48
   3   7 -19    1.39    3.25
  -3  -7 -19   -0.20    3.13
   4   7 -19    7.22    3.20
   5  -7 -19   -1.84    3.57
   5   7 -19   -0.05    3.26
   6  -7 -19   17.10    5.38
   6   7 -19   20.57    5.50
   7  -7 -19   33.92    6.35
   7   7 -19   20.97    5.36
   8  -7 -19    5.93    4.54
   8   7 -19   -6.47    3.71
   9  -7 -19   10.60    5.64
   9   7 -19   20.47    6.30
  10  -7 -19   16.96    7.26
  10   7 -19   37.61    7.10
   0  -7 -20    4.69    3.46
   0   7 -20    1.48    3.33
   1  -7 -20    5.81    3.94
  -1  -7 -20   24.43    4.96
   1   7 -20   23.14    4.99
   2  -7 -20    1.48    3.89
   2   7 -20    2.17    3.49
  -2  -7 -20    0.05    3.53
   3  -7 -20   30.24    5.61
   3   7 -20   25.65    5.66
   4  -7 -20   -2.18    4.39
   4   7 -20    4.50    4.04
   5  -7 -20   48.53    7.48
   5   7 -20   49.38    8.32
   6  -7 -20    4.22    4.22
   6   7 -20    4.78    4.38
   7  -7 -20    0.75    4.45
   7   7 -20    5.07    4.51
   8  -7 -20   25.11    6.62
   9  -7 -20    4.45    6.28
   9   7 -20   -1.74    4.51
   0   7 -21    0.99    3.45
   1  -7 -21    2.87    3.97
  -1  -7 -21    4.24    3.75
   1   7 -21    7.03    4.03
   2  -7 -21   12.18    5.16
   2   7 -21    8.68    4.39
  -2  -7 -21    6.77    4.25
   3  -7 -21   16.58    4.72
   3   7 -21   12.25    4.35
   4  -7 -21   13.29    4.77
   4   7 -21   14.55    4.98
   5  -7 -21   -1.43    4.80
   5   7 -21    9.52    4.80
   6  -7 -21   -1.57    4.82
   7  -7 -21    2.79    4.67
   7   7 -21    6.62    4.84
   8   7 -21   15.72    5.73
   0   7 -22   -5.04    3.78
   0  -7 -22    8.81    3.60
   1  -7 -22   24.03    5.92
  -1  -7 -22   17.43    4.95
   1   7 -22   12.44    5.01
   2  -7 -22    5.46    4.70
  -2  -7 -22    3.66    4.11
   2   7 -22    2.61    4.39
   3  -7 -22   39.43    7.26
   4  -7 -22   -0.45    4.72
   4   7 -22    5.50    4.41
   5  -7 -22    0.07    4.37
   5   7 -22    0.08    4.38
   6  -7 -22   -2.50    5.03
   6   7 -22    8.90    4.83
   0  -7 -23    1.02    4.45
   1  -7 -23   10.95    5.31
   1   7 -23    5.92    4.54
  -1  -7 -23    7.07    4.58
   2  -7 -23   23.31    6.10
   2   7 -23   16.74    5.79
  -2  -7 -23   17.48    5.24
   3  -7 -23   -1.93    4.89
   3   7 -23   -4.11    4.33
  -1  -8   0    3.77    0.98
  -2  -8   0    3.13    0.99
   2  -8   0    2.38    1.82
   3  -8   0    2.50    1.95
   3   8   0    0.39    0.75
  -3  -8   0    0.38    0.76
   4   8   0   61.93    4.77
  -4  -8   0   73.33    4.78
   4  -8   0   75.42    5.97
   5   8   0    1.33    0.86
   5  -8   0    0.14    2.01
  -5  -8   0    2.75    1.03
   6   8   0  865.97   55.67
   6  -8   0  950.73   56.75
  -6  -8   0  946.62   55.62
  -7  -8   0    0.31    1.34
   7  -8   0    1.72    2.62
   7   8   0    1.72    1.08
   8   8   0  128.58    9.08
   8  -8   0  135.85   10.32
   9  -8   0    0.77    2.60
  -9  -8   0    1.05    1.90
   9   8   0   -0.92    1.27
  10   8   0    6.49    2.11
  10  -8   0    6.90    3.56
  11   8   0    0.40    1.67
  11  -8   0   -1.86    2.71
  12   8   0   24.15    3.68
  12  -8   0   22.65    5.15
  13  -8   0   -4.28    3.03
  13   8   0   -5.17    1.88
  14   8   0    3.24    2.65
  14  -8   0   -2.41    3.67
  15   8   0    2.86    2.68
  15  -8   0   -4.65    3.69
  16   8   0   64.23    7.37
  16  -8   0   75.81    9.08
  17   8   0    4.86    3.41
  17  -8   0    0.62    5.35
  18  -8   0   23.32    6.51
  18   8   0   30.01    5.28
   0  -8   1   53.95    4.12
   0  -8  -1   47.32    4.11
   1  -8  -1  102.63    8.04
  -1  -8   1  127.93    7.92
  -1  -8  -1  127.59    7.59
  -1  -8  -1  108.67    7.68
   2  -8  -1    0.19    1.66
  -2  -8   1    1.03    0.94
   2  -8   1    1.99    2.10
  -2  -8  -1    0.58    0.71
   3  -8  -1    2.38    1.82
  -3  -8   1    1.17    0.98
   3  -8   1    1.30    1.92
  -3  -8  -1    0.23    0.58
   3   8  -1    0.85    1.04
   4  -8  -1   25.36    3.70
  -4  -8   1   27.02    2.46
   4  -8   1   25.21    3.68
   4   8  -1   26.10    2.48
  -4  -8  -1   23.22    1.98
  -5  -8   1   44.70    3.62
   5   8   1   46.96    3.35
   5  -8  -1   44.28    4.66
   5  -8   1   41.38    4.71
  -5  -8  -1   44.37    3.37
   5   8  -1   50.82    3.80
   6  -8  -1    5.39    2.54
   6   8   1    4.31    1.15
  -6  -8   1    7.07    1.49
   6   8  -1    6.08    1.53
   6  -8   1    8.48    2.47
  -6  -8  -1    4.08    1.28
  -7  -8   1   15.32    2.66
   7  -8  -1   19.60    3.59
   7   8   1   19.46    2.30
   7   8  -1   18.57    2.57
  -7  -8  -1   16.54    2.22
   7  -8   1   21.13    3.68
   8  -8  -1    9.04    3.20
   8   8   1    5.43    1.50
  -8  -8   1    8.10    1.88
   8   8  -1    3.34    1.64
  -8  -8  -1    5.89    1.74
   8  -8   1    7.87    2.94
   9   8   1    5.46    1.65
   9  -8  -1    4.11    3.05
  -9  -8   1    6.33    2.55
   9  -8   1    3.42    3.07
   9   8  -1    3.49    1.81
  -9  -8  -1    8.42    2.14
  10  -8  -1    2.04    2.98
  10   8   1    2.28    1.59
 -10  -8  -1    3.50    2.33
  10   8  -1   -2.44    1.53
  10  -8   1    3.82    3.22
  11  -8  -1    7.35    3.57
  11   8   1    4.20    2.17
  11   8  -1    6.60    2.25
  11  -8   1    4.02    2.99
  12  -8  -1   -0.87    3.01
  12   8   1    3.13    2.09
  12   8  -1    2.20    2.07
  12  -8   1    0.19    3.34
  13  -8  -1   -4.36    2.80
  13   8   1    2.54    2.30
  13  -8   1    2.12    3.17
  13   8  -1    0.41    2.12
  14   8   1    5.46    2.92
  14  -8  -1    0.77    3.44
  14   8  -1    3.02    2.51
  14  -8   1    8.98    3.51
  15  -8  -1    6.12    4.07
  15   8   1    6.56    3.23
  15  -8   1   -1.32    3.87
  15   8  -1    9.13    3.30
  16   8   1   -4.47    2.88
  16  -8  -1    3.10    4.98
  16  -8   1    6.60    4.91
  16   8  -1    4.37    3.27
  17   8   1   12.27    3.70
  17  -8  -1   31.74    6.01
  17  -8   1    9.93    5.86
  17   8  -1   11.65    4.44
  18   8   1    4.04    3.91
  18  -8  -1   -3.16    5.05
  18   8  -1   10.22    4.36
  18  -8   1    2.56    5.31
   0  -8  -2  678.90   39.39
   0  -8   2  619.01   39.67
   1  -8  -2  217.43   13.84
  -1  -8   2  211.15   13.83
  -1  -8  -2  216.78   13.37
   1  -8   2  218.97   14.40
  -2  -8   2  164.18   11.25
   2  -8  -2  192.68   11.63
   2   8  -2  165.15   11.21
   3  -8  -2    6.07    2.25
  -3  -8   2    5.34    1.38
   3   8  -2   10.58    1.74
  -3   8   2    5.29    1.93
   4  -8  -2  129.99    8.96
  -4  -8   2  119.95    8.18
   4  -8   2  121.66    8.99
  -4   8   2  113.96    8.78
   5  -8  -2    2.51    1.99
  -5  -8   2   -1.04    0.99
   5  -8   2    0.50    1.91
   5   8  -2    1.81    1.07
   6   8   2    6.26    1.11
   6  -8  -2    3.15    2.29
  -6  -8   2    7.20    1.96
  -6  -8  -2    4.85    1.22
   6   8  -2    6.49    1.68
   6  -8   2    7.42    2.55
   7  -8  -2  165.08   11.58
   7   8   2  154.96   10.06
  -7  -8   2  153.42   10.54
   7  -8   2  143.90   11.42
   7   8  -2  143.24   10.62
  -7  -8  -2  170.97   10.14
  -8  -8   2  668.89   40.30
   8  -8  -2  688.38   41.33
  -8  -8  -2  647.23   39.82
   8  -8   2  653.74   41.30
   8   8  -2  611.30   40.36
   9   8   2   35.57    3.34
   9  -8  -2   29.52    4.75
  -9  -8  -2   34.48    5.24
   9   8  -2   27.08    4.03
   9  -8   2   29.99    4.99
  10   8   2   55.80    4.94
  10  -8  -2   52.22    6.49
 -10  -8  -2   58.42    5.34
  10  -8   2   65.49    7.74
  10   8  -2   63.20    5.68
  11   8   2   62.57    5.82
  11  -8  -2   75.71    7.62
  11   8  -2   66.57    6.22
  11  -8   2   71.48    7.60
  12  -8  -2   41.17    6.38
  12   8   2   42.81    4.71
  12  -8   2   49.41    6.86
  13  -8  -2    6.94    3.66
  13   8   2    1.78    2.63
  13  -8   2    3.39    3.12
  13   8  -2    4.97    2.50
  14   8   2   16.36    3.81
  14  -8  -2   17.84    5.04
  14  -8   2   20.09    5.13
  14   8  -2   21.42    3.93
  15   8   2   19.14    4.13
  15  -8  -2   16.28    4.92
  15   8  -2   23.84    4.48
  15  -8   2   26.28    5.69
  16  -8  -2  262.43   19.75
  16   8   2  259.21   17.99
  16   8  -2  254.94   18.38
  16  -8   2  243.92   19.67
  17  -8  -2   62.17    9.25
  17   8   2   43.40    6.46
  17   8  -2   62.52    8.40
  17  -8   2   64.71    9.39
  18  -8  -2   -1.68    5.12
  18  -8   2    0.30    5.59
   0  -8  -3    1.82    1.12
  -1  -8   3   18.27    2.50
   1  -8  -3   16.92    2.35
  -1   8   3   17.83    2.44
  -1  -8  -3   16.22    1.74
   1  -8   3   22.73    2.80
   2  -8  -3    4.01    1.76
  -2  -8   3    1.30    1.27
   2   8  -3    3.11    1.30
  -2   8   3    0.04    1.50
   3  -8  -3   21.85    2.95
  -3  -8   3   21.62    2.48
   3   8  -3   16.88    2.52
  -3   8   3   20.29    2.93
   4  -8  -3    8.38    2.22
  -4  -8   3    9.20    1.80
   4   8  -3    6.51    1.67
  -4   8   3    3.11    1.99
  -5  -8   3    0.33    1.21
   5  -8  -3    0.59    1.89
   5   8  -3   -0.50    1.11
   5  -8   3   -0.85    1.69
   6  -8  -3    3.61    2.10
  -6  -8   3    7.88    1.82
   6  -8   3    8.19    2.61
   6   8  -3    6.14    1.77
   7   8   3   60.14    4.26
   7  -8  -3   52.64    5.77
  -7  -8   3   61.80    5.03
   7  -8   3   61.44    6.14
   7   8  -3   57.06    5.10
   8   8   3    8.31    1.70
   8  -8  -3    9.43    3.26
   8   8  -3    5.91    2.17
   8  -8   3    2.49    2.88
   9  -8  -3   57.78    6.12
   9   8   3   56.69    4.54
   9  -8   3   56.35    6.39
   9   8  -3   54.56    5.29
  10   8   3    3.05    1.58
  10  -8  -3    1.54    2.77
  10  -8   3   11.36    3.51
  10   8  -3    3.44    2.19
  11   8   3   14.01    2.51
  11  -8  -3   11.56    3.71
  11  -8   3   10.87    3.99
  11   8  -3   11.27    2.86
  12   8   3   10.92    2.66
  12  -8  -3   11.23    3.69
  12  -8   3   11.02    3.31
  12   8  -3    6.31    2.73
  13  -8  -3    1.60    3.68
  13   8   3    3.77    2.35
  13  -8   3   -0.78    3.72
  13   8  -3    0.07    2.68
  14  -8  -3    3.51    3.57
  14   8  -3    3.70    2.96
  14  -8   3    3.55    3.93
  15   8   3    4.63    3.22
  15  -8  -3    2.05    3.71
  15  -8   3    4.68    4.44
  15   8  -3    2.54    2.94
  16   8   3    4.98    3.42
  16  -8  -3    4.55    4.48
  16   8  -3    7.30    3.07
  16  -8   3    1.65    4.56
  17  -8  -3    1.84    5.26
  17   8   3    4.63    3.74
  17  -8   3    8.48    4.93
  17   8  -3    4.61    3.63
  18   8   3    3.85    6.11
  18  -8  -3    2.05    5.11
  18  -8   3    4.40    5.29
  18   8  -3    4.00    4.22
   0  -8  -4  379.12   23.57
   0  -8   4  378.36   24.22
   0   8   4  395.92   23.60
  -1  -8   4  990.02   63.04
   1  -8  -4 1077.80   62.71
   1   8  -4 1024.25   62.99
  -1   8   4 1104.23   62.75
  -1  -8  -4 1006.43   62.23
   1  -8   4 1022.30   63.16
  -2  -8   4   29.70    3.14
   2  -8  -4   29.78    3.12
   2   8  -4   27.82    3.06
   2  -8   4   27.65    3.69
  -2   8   4   29.59    3.22
   3  -8  -4  134.10    9.84
  -3  -8   4  147.36    9.85
   3   8  -4  147.41    9.89
  -3   8   4  147.37    9.96
   4  -8  -4   14.18    2.69
  -4  -8   4   11.88    2.17
  -4   8   4   11.62    2.81
   4   8  -4   10.38    2.15
  -5  -8   4    0.06    1.29
   5  -8  -4    3.84    1.98
   5   8  -4    0.84    1.24
  -6  -8   4  238.11   16.29
   6  -8  -4  265.32   16.97
   6   8  -4  233.76   16.51
   6  -8   4  273.30   17.31
   7  -8  -4   14.32    3.37
   7   8   4   14.95    1.74
   7   8  -4   20.17    3.05
   8  -8  -4  450.72   28.02
   8   8   4  425.46   26.24
   8  -8   4  423.89   28.04
   8   8  -4  414.36   27.36
   9  -8  -4   24.94    4.48
   9   8   4   23.08    2.79
   9  -8   4   15.10    4.09
   9   8  -4   13.54    3.15
  10   8   4   72.69    5.68
  10  -8  -4   84.66    7.64
  10  -8   4   64.36    7.32
  10   8  -4   71.93    6.72
  11  -8  -4   56.75    6.97
  11   8   4   63.36    5.44
  11   8  -4   74.46    6.66
  11  -8   4   71.90    7.52
  12   8   4    3.97    2.04
  12  -8  -4    0.21    3.40
  12  -8   4    7.93    4.20
  12   8  -4   11.58    3.29
  13   8   4   -0.86    1.99
  13   8  -4    3.31    2.82
  14   8   4    2.33    2.64
  14  -8  -4    4.93    3.38
  14   8  -4   -2.66    2.28
  14  -8   4    2.33    3.76
  15   8   4    2.90    2.82
  15  -8  -4    1.99    4.03
  15   8  -4   -4.03    2.50
  15  -8   4   -1.62    3.86
  16  -8  -4   84.36   10.29
  16   8   4   97.77    8.40
  16  -8   4   72.79   10.28
  17   8   4    3.03    3.49
  17   8  -4    1.42    3.73
  17  -8   4    3.21    4.73
  18   8  -4  148.02   13.18
   0   8   5   -0.47    1.15
   0  -8   5    4.22    1.71
   0  -8  -5    2.08    1.01
  -1  -8   5   12.75    2.38
   1   8   5   11.83    1.55
   1  -8  -5   12.88    2.22
   1   8  -5   11.98    2.21
  -1  -8  -5   11.40    1.48
  -1   8   5   13.77    2.13
   2  -8  -5   10.41    2.07
  -2  -8   5   17.41    2.64
   2   8  -5   18.86    2.55
  -2   8   5   11.28    2.50
  -3  -8   5   45.29    4.33
   3  -8  -5   49.19    4.50
   3   8  -5   54.58    4.55
  -3   8   5   47.36    4.53
   4  -8  -5    4.85    2.02
  -4  -8   5    4.33    1.58
   4   8  -5    4.41    1.73
   5  -8  -5    2.96    1.92
   5   8  -5    1.26    1.24
   6  -8  -5   13.53    3.09
   6   8  -5   12.95    2.69
   6  -8   5   16.08    3.61
   7  -8  -5   88.96    7.80
   7  -8   5   94.47    8.12
   7   8  -5   84.59    7.24
   8   8   5   12.93    1.88
   8  -8  -5   12.42    3.46
   8  -8   5   17.17    3.84
   8   8  -5   16.17    3.14
   9  -8  -5   74.57    7.44
   9   8  -5   82.85    7.09
   9  -8   5   72.94    7.72
  10   8   5    1.25    1.39
  10  -8  -5    2.52    2.78
  10  -8   5    2.12    2.82
  11  -8  -5    1.18    2.80
  11   8   5    0.20    1.71
  11  -8   5    5.31    3.60
  11   8  -5    0.97    2.09
  12  -8  -5   10.15    3.73
  12   8   5    7.96    2.40
  12   8  -5    6.33    2.91
  12  -8   5   -0.55    3.48
  13  -8  -5   28.23    5.59
  13   8   5   29.73    3.81
  13   8  -5   23.75    4.57
  13  -8   5   23.69    5.53
  14   8   5    3.71    2.61
  14  -8  -5   -3.49    3.35
  14   8  -5   -1.60    2.54
  14  -8   5    0.73    3.73
  15   8   5    1.67    3.00
  15  -8  -5   11.97    4.67
  15   8  -5    5.32    3.13
  15  -8   5    3.74    4.57
  16   8   5    1.84    3.24
  16  -8  -5    6.40    4.86
  16   8  -5   -3.34    3.03
  16  -8   5   12.08    5.66
  17  -8  -5   -1.78    7.85
  17   8   5   -1.35    3.99
  17   8  -5   -0.39    3.84
  17  -8   5   -4.55    5.82
   0  -8  -6  164.15   11.09
   0   8   6  180.46   11.11
   1   8   6    8.52    1.35
   1  -8  -6    9.35    1.75
   1   8  -6    4.05    1.62
  -1  -8  -6    5.38    1.19
  -1   8   6    6.43    1.62
   2  -8  -6  401.20   25.89
   2   8  -6  412.84   26.22
  -2   8   6  428.88   25.88
   3  -8  -6  353.05   22.77
  -3   8   6  365.23   22.70
   3   8  -6  355.66   22.95
   4  -8  -6   64.56    5.46
   4   8  -6   55.21    5.20
   5  -8  -6    4.19    2.18
   5   8  -6   10.71    2.48
   6  -8  -6   48.28    4.93
   6   8  -6   40.70    4.58
   7  -8   6  599.32   38.29
   7   8  -6  600.36   37.86
   8  -8  -6    1.26    2.42
   8   8   6    2.18    1.11
   8   8   6    2.94    1.16
   8   8  -6    6.15    2.44
   8  -8   6    7.59    3.06
   9  -8  -6  280.86   18.81
   9   8   6  235.73   16.56
   9  -8   6  298.09   19.03
  10  -8  -6   56.63    7.30
  10   8   6   54.53    4.66
  10  -8   6   70.25    7.11
  10   8  -6   57.55    6.18
  11  -8  -6   65.75    7.33
  11   8   6   60.25    5.38
  11   8  -6   69.98    6.82
  11  -8   6   72.95    7.90
  12   8   6   11.66    2.67
  12  -8  -6   15.04    4.43
  12   8  -6    6.59    3.11
  12  -8   6    7.10    3.69
  13  -8  -6   82.65    9.03
  13   8   6   67.69    6.44
  13   8  -6   88.12    8.09
  13  -8   6   72.98    8.67
  14   8   6    6.27    2.75
  14  -8  -6   11.05    4.78
  14   8  -6   14.33    3.43
  14  -8   6   18.60    5.21
  15  -8  -6   -0.69    4.13
  15   8   6    4.78    2.81
  15  -8   6    2.15    4.46
  15   8  -6    4.28    4.06
  16  -8  -6    2.13    4.34
  16   8   6   -2.17    3.09
  16  -8   6   -1.62    4.91
  16   8  -6    5.44    3.77
  17  -8  -6   29.73    7.07
  17   8  -6   40.19    6.42
   0   8   7   16.12    2.12
   0   8  -7   26.22    3.42
   0  -8  -7   15.90    2.45
   1  -8  -7   21.20    2.61
   1   8   7   23.75    2.38
   1   8  -7   24.80    2.97
  -1   8   7   19.34    2.53
  -1  -8  -7   22.46    2.28
   2   8   7    2.85    0.95
   2  -8  -7    1.28    1.29
   2   8  -7    0.64    1.33
  -2   8   7    4.45    1.76
  -2  -8  -7    0.02    0.77
   3  -8  -7    2.19    1.65
  -3   8   7    6.30    2.14
   3   8  -7    3.03    1.54
   4  -8  -7   10.05    2.54
   4   8  -7   16.71    2.96
   5  -8  -7    6.12    2.35
   5   8  -7   10.66    2.56
   6  -8  -7    4.48    2.40
   6   8  -7    1.20    1.95
   7  -8  -7   19.67    3.94
   7   8  -7   16.82    3.25
   8   8   7    2.16    1.14
   8   8   7    0.15    1.05
   8  -8  -7    1.22    2.43
   8  -8   7    2.23    3.04
   9   8   7   29.08    2.97
   9  -8  -7   30.31    5.33
   9  -8   7   34.17    5.73
   9   8  -7   35.42    5.14
  10   8   7    4.37    2.16
  10   8   7    5.58    1.80
  10  -8  -7   13.16    3.98
  10  -8   7    8.99    3.44
  10   8  -7    8.43    2.97
  11   8   7   -2.01    1.62
  11   8   7   -2.11    1.85
  11  -8  -7   -4.20    2.47
  11   8  -7    2.62    2.41
  11  -8   7    0.65    3.13
  12   8   7    3.19    2.22
  12  -8  -7   11.77    3.82
  12   8  -7    6.44    3.02
  12  -8   7    3.66    3.50
  13  -8  -7   18.18    4.70
  13   8   7   12.45    2.97
  13  -8   7   12.33    4.92
  13   8  -7   17.41    4.13
  14  -8  -7    1.22    3.63
  14   8   7    2.79    2.52
  14  -8   7   -0.47    3.79
  14   8  -7   -1.01    3.07
  15  -8  -7    2.48    4.23
  15   8   7    2.82    2.83
  15   8  -7    1.22    3.20
  15  -8   7   -0.14    4.53
  16   8   7    0.78    3.61
  16  -8  -7   13.00    5.08
  16  -8   7    7.32    5.92
  16   8  -7    4.19    3.60
  17  -8  -7   11.81    5.32
  17  -8   7    5.62    5.51
  17   8  -7    3.74    4.12
   0  -8  -8  164.13   11.18
   0   8  -8  177.37   11.92
   0   8   8  166.92   11.08
   1  -8  -8   57.23    5.10
   1   8   8   68.00    4.69
  -1  -8  -8   56.68    4.72
  -1   8   8   65.44    5.09
   1   8  -8   65.90    5.54
   2   8   8   30.30    2.70
   2  -8  -8   31.97    3.48
  -2   8   8   39.25    3.55
   2   8  -8   30.56    3.74
  -2  -8  -8   29.82    2.80
   3   8   8    5.67    1.16
   3  -8  -8    6.89    2.15
   3   8  -8    1.34    1.72
   4  -8  -8   39.10    4.76
   4   8  -8   31.91    4.00
   5  -8  -8  142.09   10.22
   5   8  -8  123.12   10.01
   6  -8  -8  373.08   24.96
   6   8  -8  370.59   24.51
   7  -8  -8   30.08    4.84
   7   8  -8   33.05    5.51
   8   8   8   34.29    3.19
   8  -8  -8   39.82    5.60
   8   8   8   38.14    3.24
   8  -8   8   37.58    5.99
   8   8  -8   33.72    5.28
   9   8   8  374.17   24.27
   9  -8  -8  406.54   26.18
   9   8   8  371.51   23.97
   9   8  -8  392.65   25.84
   9  -8   8  391.44   26.07
  10   8   8   24.52    3.02
  10  -8  -8   22.02    4.68
  10   8  -8   25.40    4.65
  10  -8   8   29.39    5.61
  11   8   8   -0.77    1.64
  11   8   8    1.90    2.10
  11  -8  -8    4.49    3.05
  11  -8   8    0.70    3.22
  11   8  -8   -2.10    2.47
  12  -8  -8  166.21   14.96
  12   8   8  145.75   10.82
  12  -8   8  149.21   15.80
  12   8  -8  175.45   12.95
  13  -8  -8  247.60   18.15
  13   8   8  219.89   15.46
  13  -8   8  233.09   17.80
  13   8  -8  235.13   17.38
  14   8   8   45.87    5.69
  14  -8  -8   65.05    8.93
  14  -8   8   57.75    8.78
  15   8   8   42.95    5.19
  15  -8  -8   37.67    7.01
  15   8  -8   41.70    6.33
  15  -8   8   40.31    7.58
  16  -8  -8   -4.30    5.22
  16   8  -8    4.42    3.71
  16  -8   8    2.78    5.50
  17  -8  -8   22.38    6.38
  17  -8   8   20.43    7.12
  17   8  -8   23.48    5.90
   0  -8  -9    8.03    1.89
   0   8   9    6.45    1.78
   0   8  -9    5.95    2.16
   1   8   9   49.93    4.38
   1  -8  -9   61.60    5.05
  -1   8   9   54.80    4.75
   1   8  -9   55.18    5.26
  -1  -8  -9   61.75    4.65
   2  -8  -9    1.64    1.59
   2   8   9    0.28    0.98
   2   8  -9    0.92    1.46
  -2  -8  -9    1.73    1.16
   3   8   9    5.20    1.43
   3  -8  -9    6.52    2.21
   3   8  -9    6.85    2.28
  -3  -8  -9    6.85    1.30
   4   8   9    0.75    1.14
   4  -8  -9    5.53    2.35
   4   8  -9    3.09    1.94
   5  -8  -9   51.09    5.53
   5   8   9   49.48    3.78
   6   8   9    4.80    1.30
   6   8   9    5.20    1.41
   6  -8  -9    0.61    2.33
   6   8  -9    2.57    2.20
   7   8   9   40.06    3.28
   7  -8  -9   30.63    5.18
   7   8   9   33.41    3.09
   7   8  -9   27.95    4.70
   8  -8  -9   12.18    3.24
   8   8   9   10.58    2.17
   8   8   9    8.15    1.81
   8   8  -9   12.74    3.42
   9   8   9    3.76    1.63
   9  -8  -9    4.82    2.78
   9   8   9    5.46    1.99
   9   8  -9    6.46    3.04
   9  -8   9    9.10    3.92
  10   8   9   11.65    3.68
  10   8   9   13.39    2.23
  10  -8  -9   20.59    4.40
  10   8  -9    5.19    3.34
  10  -8   9   18.11    4.51
  11   8   9   -0.53    2.32
  11   8   9   -0.26    1.85
  11  -8  -9    5.33    3.17
  11   8  -9   -0.08    2.79
  11  -8   9    5.32    3.91
  12  -8  -9   -3.87    2.84
  12   8   9    3.26    2.16
  12   8  -9    4.08    3.09
  12  -8   9    0.12    3.59
  13  -8  -9   -0.07    3.76
  13   8   9   -2.08    2.14
  13   8  -9    2.78    3.11
  13  -8   9    7.32    4.14
  14  -8  -9   22.24    5.20
  14   8   9   15.56    3.47
  14  -8   9   10.50    5.13
  14   8  -9   12.14    4.15
  15  -8  -9   -5.58    3.62
  15  -8   9   -0.94    4.49
  15   8  -9    1.68    3.35
  16  -8  -9    1.75    4.58
  16   8  -9   -1.31    4.36
  16  -8   9    2.36    5.88
   0   8  10    1.28    1.61
   0  -8 -10    1.15    1.44
   1   8  10   98.17    7.45
   1  -8 -10   97.63    7.69
  -1  -8 -10   96.84    7.43
  -1   8  10  116.92    8.23
   2  -8 -10   87.81    7.02
   2   8  10   80.85    6.10
  -2  -8 -10   81.82    6.23
   2   8 -10   98.89   10.08
   3  -8 -10 1017.71   62.36
   3   8  10 1024.04   61.32
   3   8 -10  995.65   62.74
   4  -8 -10   52.83    5.27
   4   8  10   40.45    3.59
   4   8 -10   43.14    5.76
   5  -8 -10  237.80   18.55
   5   8  10  256.38   15.52
   5   8 -10  232.24   17.03
   6   8  10  181.93   11.73
   6  -8 -10  189.16   13.60
   6   8  10  182.16   11.73
   6   8 -10  167.90   13.41
   7  -8 -10   50.30    5.95
   7   8  10   42.68    4.00
   7   8 -10   53.63    5.80
   8   8  10  176.15   11.74
   8  -8 -10  198.28   14.18
   8   8  10  181.39   11.97
   8   8 -10  171.66   13.69
   9   8  10   83.82    6.20
   9   8  10   76.28    6.91
   9  -8 -10   83.24    8.15
   9  -8  10   91.48    8.80
   9   8 -10   78.47    7.98
  10  -8 -10   64.39    7.24
  10   8  10   59.64    5.46
  10   8  10   60.92    5.24
  10   8 -10   63.11    6.99
  10  -8  10   70.91    7.89
  11   8  10    6.05    2.30
  11   8 -10    4.17    2.55
  12   8  10   37.53    4.26
  12  -8 -10   35.72    6.55
  12  -8  10   42.56    7.15
  12   8 -10   40.30    6.46
  13   8  10    9.57    2.95
  13  -8 -10    7.77    4.38
  13  -8  10   24.53    5.42
  13   8 -10    8.79    4.17
  14  -8 -10   -4.32    3.38
  14   8  10   -2.16    2.80
  14   8 -10   -4.70    2.95
  14  -8  10    4.26    4.52
  15  -8 -10   10.35    5.02
  15   8 -10    8.42    4.29
  15  -8  10   -8.15    4.17
  16  -8 -10    6.95    5.07
  16   8 -10   -3.95    4.06
  16  -8  10    8.79    6.65
   0   8 -11    5.93    2.52
   0   8  11    4.05    2.13
   0  -8 -11    6.36    2.05
   1   8  11   73.20    6.07
  -1   8 -11   82.18    7.02
   1  -8 -11   79.49    6.58
   1   8 -11   78.18    7.01
  -1  -8 -11   77.99    6.26
   2   8  11   -0.29    1.42
   2  -8 -11   -0.90    1.62
  -2  -8 -11   -2.95    1.35
   2   8 -11    3.56    1.97
   3   8  11   35.45    4.03
   3  -8 -11   23.92    3.89
   3   8 -11   24.92    4.15
  -3  -8 -11   25.43    3.12
   4   8  11    3.93    1.73
   4  -8 -11    5.18    2.46
   4   8 -11    1.41    2.23
   5  -8 -11   62.55    6.49
   5   8  11   60.61    4.89
   5   8 -11   60.42    6.52
   6   8  11   29.74    3.19
   6  -8 -11   27.04    4.65
   6   8 -11   29.45    4.76
   7   8  11   14.66    2.49
   7   8  11   12.43    2.26
   7  -8 -11    7.97    3.25
   7   8 -11   12.97    3.75
   8  -8 -11   16.76    4.15
   8   8  11   16.50    2.64
   8   8  11   16.41    3.27
   8   8 -11   17.82    4.26
   9   8  11    0.17    2.11
   9  -8 -11   -2.38    2.88
   9   8  11   -0.85    1.72
   9   8 -11    0.54    2.44
  10   8  11    0.75    1.81
  10   8  11   -2.56    2.87
  10  -8 -11   -0.80    2.94
  10   8 -11   -4.63    2.51
  10  -8  11    0.99    3.41
  11  -8 -11    6.58    3.83
  11   8  11    8.67    2.42
  11   8 -11    5.51    3.17
  11  -8  11    6.98    4.46
  12   8  11    1.54    2.48
  12  -8 -11    8.42    4.25
  12   8 -11    5.30    3.51
  12  -8  11    7.07    4.00
  13  -8 -11   -0.08    3.71
  13   8  11    2.35    2.57
  13   8 -11    3.32    3.38
  13  -8  11    2.51    3.68
  14  -8 -11    3.20    4.66
  14  -8  11    2.93    4.95
  14   8 -11    5.04    4.06
  15  -8  11    4.86    5.41
  15   8 -11    7.83    4.71
  16  -8 -11    1.43    5.09
  16  -8  11   -4.60    5.61
  16   8 -11   -6.12    4.29
   0   8 -12 1572.16   98.64
   0  -8 -12 1656.14   98.07
   1  -8 -12  333.69   21.99
  -1   8 -12  340.72   22.50
  -1  -8 -12  338.39   21.62
   1   8 -12  327.34   22.45
   2   8  12  241.22   16.33
   2  -8 -12  255.19   17.15
  -2  -8 -12  255.13   16.47
   2   8 -12  251.71   17.52
   3  -8 -12    4.78    2.61
   3   8  12    7.52    2.05
  -3  -8 -12   10.72    2.25
   3   8 -12   12.87    3.27
   4   8  12  198.18   13.17
   4  -8 -12  203.32   14.45
   4   8 -12  192.80   14.64
   5  -8 -12   -1.11    2.58
   5   8  12    2.20    1.92
   5   8 -12    0.11    2.09
   6  -8 -12   68.82    7.27
   6   8  12   61.64    6.53
   6   8 -12   83.34    7.61
   7  -8 -12   47.36    6.66
   7   8  12   41.08    4.33
   7   8  12   37.51    4.28
   7   8 -12   36.70    5.95
   8   8  12    6.77    2.11
   8  -8 -12    2.81    3.31
   8   8  12    6.28    2.51
   8   8 -12    7.11    2.94
   9   8  12   13.44    2.79
   9   8  12   16.62    3.22
   9  -8 -12   20.27    4.67
   9   8 -12   16.88    4.16
  10   8  12   16.36    2.86
  10   8 -12   10.68    3.93
  10  -8  12   17.83    4.85
  11  -8 -12   52.61    8.13
  11   8  12   53.46    5.24
  11   8 -12   63.56    8.18
  11  -8  12   52.71    7.91
  12  -8 -12   -0.20    3.71
  12   8  12   -3.69    2.46
  12   8 -12    5.70    3.70
  12  -8  12   -9.48    2.99
  13   8  12    1.62    3.58
  13  -8 -12    8.16    4.75
  13   8 -12   16.91    4.74
  13  -8  12   17.70    5.28
  14  -8 -12   21.17    6.45
  14   8 -12   30.84    6.36
  14  -8  12   24.79    5.96
  15  -8 -12   -3.98    4.93
  15   8 -12   -1.77    4.05
   0   8 -13  101.75    8.92
   0  -8 -13  110.13    8.49
  -1   8 -13   11.17    3.26
   1  -8 -13   16.13    3.42
  -1  -8 -13   20.42    3.19
   1   8 -13   15.20    3.52
   2  -8 -13    6.32    2.40
  -2  -8 -13    6.31    2.26
   2   8 -13    2.52    2.32
   3  -8 -13    2.94    2.68
  -3  -8 -13    2.05    1.73
   3   8 -13    0.49    2.06
   4  -8 -13   46.14    5.97
   4   8  13   44.29    4.50
   4   8 -13   32.38    5.35
   5  -8 -13   41.43    5.98
   5   8  13   40.67    4.55
   5   8 -13   46.02    6.25
   6  -8 -13   16.59    4.16
   6   8  13   17.61    3.01
   6   8 -13   19.02    4.26
   7  -8 -13   12.37    3.68
   7   8  13   13.02    2.75
   7   8 -13    7.64    3.39
   8   8  13    0.25    2.46
   8  -8 -13    0.26    3.19
   8   8  13   -0.61    2.10
   8   8 -13    0.98    2.86
   9   8  13    4.04    2.37
   9  -8 -13    4.13    3.80
   9   8 -13    4.78    3.09
  10  -8 -13    2.18    3.67
  10   8  13    3.42    2.23
  10   8 -13    2.30    2.81
  10  -8  13   -4.22    3.33
  11  -8 -13   -2.19    3.58
  11   8  13    8.85    2.82
  11  -8  13    0.84    3.63
  11   8 -13    2.49    3.58
  12  -8 -13    4.83    4.70
  12   8  13   -1.43    2.50
  12   8 -13    4.10    4.07
  12  -8  13    2.40    4.28
  13  -8 -13    7.02    4.14
  13  -8  13   -0.65    4.17
  13   8 -13    1.33    4.08
  14  -8 -13   -0.31    4.71
  14   8 -13    3.05    4.46
  14  -8  13   -3.74    4.71
  15  -8 -13    5.46    5.69
  15   8 -13   -6.40    5.34
  15  -8  13   -5.22    5.16
   0   8 -14   78.18    7.57
   0  -8 -14   88.61    7.41
   1  -8 -14   -2.08    2.06
  -1   8 -14    2.28    1.96
   1   8 -14    4.75    2.45
  -1  -8 -14    0.19    1.92
   2  -8 -14   34.87    5.17
   2   8 -14   21.39    4.49
  -2  -8 -14   39.80    4.59
   3  -8 -14    2.81    2.66
   3   8 -14    3.01    2.42
  -3  -8 -14    6.22    2.42
   4  -8 -14    7.95    3.19
   4   8 -14   12.97    3.35
   5  -8 -14   22.28    4.42
   5   8 -14   18.00    4.41
   6  -8 -14  622.24   40.22
   6   8 -14  616.58   40.34
   7  -8 -14    9.72    3.76
   7   8 -14    9.14    3.63
   8   8  14    9.70    2.83
   8  -8 -14    7.62    3.36
   8   8 -14    4.98    3.85
   9   8  14    1.16    2.54
   9  -8 -14    4.18    3.81
   9   8 -14   -2.51    2.98
  10  -8 -14   58.16    8.34
  10   8  14   51.82    5.80
  10   8 -14   66.02    8.65
  11   8  14   -2.05    2.59
  11  -8 -14    0.79    3.85
  11   8 -14    0.51    3.53
  11  -8  14    1.73    3.32
  12  -8 -14   19.21    5.80
  12   8 -14   18.49    5.04
  12  -8  14   17.92    5.97
  13  -8 -14    7.41    4.97
  13   8 -14   14.93    5.73
  13  -8  14   13.44    5.66
  14  -8 -14   23.93    6.34
  14   8 -14   28.66    6.90
  14  -8  14   23.77    8.95
   0  -8 -15   81.97    7.52
   0   8 -15   86.58    8.10
   1  -8 -15    2.61    2.67
  -1   8 -15   -0.33    2.41
  -1  -8 -15   -1.92    1.98
   1   8 -15   -1.61    2.16
   2  -8 -15   15.40    3.70
  -2  -8 -15   18.78    3.33
   2   8 -15   21.61    4.52
   3  -8 -15    3.48    2.75
  -3  -8 -15    4.16    2.25
   3   8 -15    1.79    2.51
   4  -8 -15   62.02    7.11
   4   8 -15   53.75    6.59
   5  -8 -15    2.65    3.04
   5   8 -15   -2.02    2.86
   6  -8 -15   68.66    7.83
   6   8 -15   68.35    7.93
   7  -8 -15    8.55    3.60
   7   8 -15   10.07    4.72
   8   8  15   -2.08    2.69
   8   8 -15    4.73    3.47
   9  -8 -15    0.30    3.35
   9   8  15   -1.35    2.63
   9   8 -15   -1.94    3.33
  10   8  15    6.75    3.12
  10  -8 -15    2.67    3.71
  10   8 -15    8.39    3.88
  11  -8 -15   -5.53    3.73
  11   8  15    5.88    4.01
  11   8 -15    7.01    4.52
  11  -8  15    6.05    4.19
  12  -8 -15    5.15    4.21
  12   8 -15   -5.66    4.06
  12  -8  15    5.45    4.51
  13  -8  15    3.74    5.31
  13   8 -15    0.67    4.52
   0   8 -16    4.74    2.93
   0  -8 -16    6.13    2.88
   1  -8 -16   29.33    4.72
  -1   8 -16   23.48    4.58
  -1  -8 -16   25.86    5.06
   1   8 -16   23.68    4.78
   2  -8 -16    5.32    3.35
   2   8 -16    7.95    3.27
  -2  -8 -16   11.06    3.16
   3  -8 -16  183.12   14.25
  -3  -8 -16  188.79   13.26
   3   8 -16  179.30   14.27
   4  -8 -16   74.28    7.86
   4   8 -16   68.78    7.95
   5  -8 -16  264.51   18.85
   5   8 -16  235.38   20.50
   6  -8 -16   46.11    6.91
   6   8 -16   34.93    6.31
   7  -8 -16   18.20    5.35
   7   8 -16   12.07    4.37
   8  -8 -16  199.45   15.69
   8   8 -16  178.87   15.18
   9  -8 -16    7.44    4.16
   9   8  16    6.30    3.02
   9   8 -16    9.39    4.19
  10   8  16   47.90    5.75
  10  -8 -16   42.61    7.58
  10   8 -16   52.43    8.16
  11  -8 -16    9.14    4.90
  11   8 -16    3.28    4.65
  11  -8  16    2.54    4.48
  12  -8 -16   -0.46    5.40
  12  -8  16   -5.02    4.33
  12   8 -16    6.89    4.78
  13  -8 -16   10.13    5.49
  13   8 -16   -2.44    4.94
  13  -8  16   -3.21    5.04
   0   8 -17   39.75    7.64
   0  -8 -17   55.10    6.27
   1  -8 -17    2.14    2.76
  -1  -8 -17    2.80    2.80
   1   8 -17    1.86    2.89
   2  -8 -17   12.75    4.21
  -2  -8 -17    5.95    3.07
   2   8 -17    8.74    2.93
   3  -8 -17    5.85    3.13
   3   8 -17   -2.35    2.85
  -3  -8 -17    2.17    2.62
   4  -8 -17   25.24    5.22
   4   8 -17   23.50    5.29
   5  -8 -17    3.64    3.65
   5   8 -17    1.37    2.85
   6  -8 -17   48.44    8.69
   6   8 -17   36.55    6.86
   7  -8 -17    3.00    3.68
   7   8 -17   -2.78    3.14
   8  -8 -17   13.44    4.56
   8   8 -17    5.72    4.31
   9  -8 -17   -4.91    3.64
   9   8 -17   -0.05    3.64
  10  -8 -17   -3.04    3.81
  10   8 -17    1.87    3.77
  11  -8 -17   -4.52    4.24
  11   8 -17    2.59    4.20
  11  -8  17   -1.85    4.89
  12  -8 -17   -1.40    4.91
  12   8 -17    8.41    5.00
  12  -8  17    5.57    5.50
   0   8 -18   23.55    4.80
   0  -8 -18   17.89    4.51
   1  -8 -18   -1.27    2.76
   1   8 -18   -0.70    2.62
  -1  -8 -18    3.65    2.88
   2  -8 -18    3.54    3.28
   2   8 -18    4.17    3.24
  -2  -8 -18    3.95    2.98
   3  -8 -18    5.70    3.60
  -3  -8 -18    1.46    3.08
   3   8 -18    0.69    2.81
   4  -8 -18   29.04    5.38
   4   8 -18   26.87    5.31
   5  -8 -18   53.29   10.20
   5   8 -18   64.25    8.42
   6  -8 -18   41.49    6.94
   6   8 -18   41.37    6.69
   7  -8 -18  150.04   13.89
   7   8 -18  161.26   14.28
   8  -8 -18   93.03   10.20
   8   8 -18   80.17   10.58
   9  -8 -18    5.92    4.57
   9   8 -18    6.26    4.62
  10  -8 -18  125.40   12.78
  10   8 -18  115.63   12.54
  11  -8 -18   12.91    7.11
  11  -8  18    9.16    5.71
  11   8 -18    1.67    4.48
   0  -8 -19   16.02    3.99
   0   8 -19   19.84    4.78
   1  -8 -19    2.99    3.56
  -1  -8 -19    2.40    3.39
   1   8 -19    0.50    2.89
   2  -8 -19   -2.11    3.22
  -2  -8 -19   -4.24    2.75
   2   8 -19    2.58    3.05
   3  -8 -19   -3.21    3.36
   3   8 -19    6.36    3.79
   4   8 -19    0.36    3.47
   5  -8 -19    5.90    4.31
   5   8 -19    0.29    3.35
   6  -8 -19   15.37    4.64
   6   8 -19    9.17    4.23
   7  -8 -19   -8.73    3.67
   7   8 -19   -2.42    4.18
   8  -8 -19   11.14    5.08
   8   8 -19   13.46    4.91
   9  -8 -19   -1.15    5.07
  10   8 -19    0.36    4.81
   0  -8 -20  168.23   12.80
   0   8 -20  130.21   12.74
   1  -8 -20   11.60    4.06
  -1  -8 -20    8.23    3.40
   1   8 -20    6.65    3.91
   2  -8 -20   17.95    5.34
   2   8 -20   35.63    6.49
  -2  -8 -20   22.26    4.83
   3  -8 -20    9.99    4.02
   3   8 -20    2.04    3.94
   4  -8 -20  198.02   16.36
   4   8 -20  206.87   16.59
   5  -8 -20    1.32    4.34
   5   8 -20    2.56    3.84
   6  -8 -20    4.29    4.84
   6   8 -20    5.69    4.34
   7  -8 -20   -5.54    4.65
   7   8 -20    7.12    5.44
   8  -8 -20    1.20    4.76
   8   8 -20    0.39    4.51
   9   8 -20   21.56    6.38
   0   8 -21   11.52    4.62
   0  -8 -21   14.43    4.91
   1  -8 -21    1.41    4.17
   1   8 -21   -1.49    4.05
  -1  -8 -21   -0.80    3.79
   2  -8 -21    6.96    4.11
   2   8 -21    0.97    3.65
  -2  -8 -21    6.26    3.83
   3  -8 -21    3.41    4.20
   3   8 -21    3.01    3.93
   4  -8 -21    1.32    4.09
   4   8 -21   -2.51    3.76
   5  -8 -21    2.12    4.74
   5   8 -21   -3.99    7.04
   6  -8 -21    1.30    5.35
   6   8 -21    3.10    4.47
   7  -8 -21    3.29    5.35
   7   8 -21    6.19    4.66
   0  -8 -22   13.65    4.65
   1  -8 -22   10.90    4.96
  -1  -8 -22   16.29    4.77
   2  -8 -22   -2.29    4.02
   2   8 -22    5.41    5.69
   3  -8 -22    8.85    4.97
   3   8 -22    4.43    4.49
   4  -8 -22   60.58    8.75
   4   8 -22   67.47    9.41
   5  -8 -22    5.66    5.67
   5   8 -22    7.28    5.07
   0  -8 -23   18.94    5.35
   1  -8 -23   -3.81    4.67
   1   8 -23    1.50    4.22
  -1  -8 -23   -7.20    4.41
   2  -8 -23   -1.33    4.78
   2   8 -23    4.70    4.97
   0  -9   0    0.81    1.03
  -1  -9   0  186.32   11.64
   1  -9   0  176.42   12.03
   2  -9   0    0.96    1.59
  -2  -9   0   -0.06    0.83
   3  -9   0   67.73    5.92
  -3  -9   0   71.30    4.84
  -4  -9   0   -0.10    0.80
   4   9   0    1.96    0.77
   4  -9   0    4.01    2.12
   5  -9   0  191.71   14.42
   5   9   0  221.56   13.47
  -5  -9   0  220.47   13.37
  -6  -9   0    1.35    1.01
   6  -9   0    1.73    2.25
   6   9   0   -0.20    0.95
  -7  -9   0   80.60    6.15
   7  -9   0   95.85    7.91
  -8  -9   0    0.77    1.61
   8  -9   0    1.80    2.87
   8   9   0    0.33    1.15
   9   9   0   48.64    4.44
   9  -9   0   50.37    6.48
  -9  -9   0   47.56    4.59
  10  -9   0    2.44    3.17
  10   9   0    1.20    1.55
  11   9   0    6.63    2.17
  11  -9   0    7.93    3.29
  12   9   0    1.55    1.94
  12  -9   0   -4.87    2.60
  13  -9   0   -0.78    5.62
  13   9   0    6.76    2.80
  14   9   0   -0.92    2.57
  14  -9   0   -0.54    3.85
  15   9   0    3.56    2.95
  15  -9   0   -1.25    3.77
  16  -9   0   -8.14    4.15
  16   9   0   -0.47    2.82
  17   9   0    4.46    3.42
  17  -9   0    4.64    6.17
   0  -9   1    2.12    1.15
   0  -9  -1   -0.13    1.42
  -1  -9   1   51.88    4.23
   1  -9  -1   59.69    4.72
  -1  -9  -1   54.53    3.95
  -1  -9  -1   53.23    4.17
  -2  -9   1   17.05    1.89
   2  -9  -1   13.97    2.51
  -2  -9  -1    8.76    1.31
   2  -9   1    9.12    2.46
  -3  -9   1  152.35   10.02
   3  -9  -1  158.24   10.73
   3  -9   1  151.12   10.83
  -3  -9  -1  155.29    9.61
   3   9  -1  154.75    9.99
   4  -9  -1   26.23    3.56
  -4  -9   1   20.82    2.35
   4  -9   1   26.42    3.74
   4   9  -1   21.85    2.28
   5   9   1  268.10   16.20
   5  -9  -1  282.10   17.66
  -5  -9   1  258.31   16.53
  -5  -9  -1  259.93   16.14
   5  -9   1  273.15   17.69
   5   9  -1  247.01   16.58
  -6  -9   1    0.93    1.14
   6   9   1    1.97    0.98
   6  -9  -1    1.65    2.31
  -6  -9  -1    2.38    1.13
   6   9  -1    0.75    1.02
   6  -9   1    2.61    2.24
  -7  -9   1  129.66    9.01
   7  -9  -1  131.20   10.38
   7   9   1  127.51    8.77
  -7  -9  -1  141.43    8.76
   7  -9   1  138.33   11.04
   7   9  -1  126.90    9.10
   8   9   1   89.63    6.97
   8  -9  -1   89.71    8.13
  -8  -9   1   90.50    6.81
   8  -9   1  109.36    8.66
  -8  -9  -1   86.23    6.57
   8   9  -1   90.90    6.97
   9   9   1   11.06    1.98
   9  -9  -1   15.81    3.62
  -9  -9   1    6.35    2.47
   9   9  -1    9.75    2.32
   9  -9   1    5.27    3.43
  10   9   1   34.23    3.75
  10  -9  -1   32.01    5.35
  10  -9   1   36.54    5.79
 -10  -9  -1   35.12    4.13
  10   9  -1   37.36    4.47
  11  -9  -1    0.51    3.09
  11   9   1    1.39    1.66
  11  -9   1    1.99    3.10
  11   9  -1    2.77    1.82
  12  -9  -1    7.41    3.61
  12   9   1    7.40    2.34
  12  -9   1   15.51    4.60
  12   9  -1   10.53    2.73
  13  -9  -1   28.77    7.71
  13   9   1   35.37    4.57
  13  -9   1   25.50    6.04
  13   9  -1   27.18    4.37
  14  -9  -1   36.53    6.63
  14   9   1   49.54    5.34
  14   9  -1   40.43    5.33
  14  -9   1   30.81    6.46
  15  -9  -1    7.30    4.27
  15   9   1   13.50    3.65
  15   9  -1    4.11    2.96
  15  -9   1    4.05    4.18
  16   9   1   86.62    8.15
  16  -9  -1   64.82    9.51
  16  -9   1   76.36   10.13
  16   9  -1   77.08    8.20
  17   9   1   22.43    4.59
  17  -9  -1   32.41   11.87
  17  -9   1   20.92   10.16
  17   9  -1   16.02    4.51
   0  -9   2    1.07    1.09
   0  -9  -2   -0.17    1.18
  -1  -9   2   71.53    5.52
   1  -9   2   77.12    5.74
  -1  -9  -2   72.21    5.16
  -1  -9  -2   77.23    5.04
   2  -9  -2   75.06    6.15
  -2  -9   2   85.45    5.93
   3  -9  -2   41.90    4.03
  -3  -9   2   33.59    3.13
   3   9  -2   29.16    3.25
   3  -9   2   36.70    4.36
  -4  -9   2   12.72    1.96
   4  -9  -2   16.43    2.94
   4  -9   2   15.02    3.10
   4   9  -2   10.76    1.84
  -5  -9   2    4.39    1.48
   5  -9  -2    4.45    2.16
   5   9  -2    3.25    1.35
   5  -9   2    4.24    2.38
   6  -9  -2   15.85    3.14
   6  -9   2    8.36    2.81
   6   9  -2    8.03    1.86
  -7  -9   2   86.01    6.67
   7   9   2   92.88    6.13
   7  -9  -2   89.91    7.83
   7   9  -2   96.42    6.94
  -7  -9  -2   87.58    6.08
   8   9   2  171.03   10.97
  -8  -9   2  167.00   11.44
   8  -9  -2  178.79   12.87
   8   9  -2  162.13   11.59
   8  -9   2  169.84   12.88
  -8  -9  -2  167.03   10.98
   9  -9  -2    4.12    3.12
   9   9   2    5.16    1.69
   9  -9   2    5.30    3.29
   9   9  -2    5.39    2.06
  -9  -9  -2    3.00    1.97
  10  -9  -2   10.54    3.31
  10   9   2    4.31    1.75
  10  -9   2    3.75    3.24
  10   9  -2    2.03    1.87
  11   9   2   21.75    3.18
  11  -9  -2   20.34    4.99
  11  -9   2   23.07    5.05
  11   9  -2   15.12    3.12
  12   9   2   28.50    3.73
  12  -9  -2   22.77    5.41
  12   9  -2   20.94    4.16
  12  -9   2   30.26    5.78
  13  -9  -2   22.21    5.61
  13   9   2   17.01    3.21
  13   9  -2   18.00    3.56
  13  -9   2   17.80    5.40
  14  -9  -2   -3.33    3.49
  14  -9   2    4.58    4.11
  14   9  -2    4.34    2.79
  15   9   2    9.78    3.14
  15  -9  -2    5.56    4.34
  15   9  -2    2.91    2.74
  15  -9   2    9.56    4.97
  16   9   2   24.09    4.26
  16  -9  -2   25.48    6.22
  16  -9   2   26.50    6.24
  16   9  -2   14.92    4.11
  17   9   2   68.18    7.74
   0  -9  -3    1.42    1.21
   0  -9   3   -1.45    1.05
   1  -9  -3   32.64    3.53
  -1  -9   3   32.81    3.44
  -1  -9  -3   31.92    2.51
   1  -9   3   25.60    3.27
   2  -9  -3   25.23    3.06
  -2  -9   3   19.89    3.08
  -2   9   3   25.68    3.09
   2  -9   3   27.08    3.43
   2   9  -3   22.23    2.56
   3  -9  -3    1.89    1.78
  -3  -9   3    5.41    1.84
   3   9  -3    7.74    1.63
  -3   9   3    3.33    1.82
   4  -9  -3  123.34    9.23
   4  -9   3  135.65    9.75
   4   9  -3  124.18    8.79
  -5  -9   3   39.49    3.68
   5  -9  -3   36.60    4.37
   5   9  -3   41.79    3.81
   5  -9   3   39.89    4.71
  -6  -9   3    8.76    1.96
   6  -9  -3    8.97    2.87
   6  -9   3    6.81    2.75
   6   9  -3    5.81    1.91
   7  -9  -3   65.96    6.58
  -7  -9   3   65.07    5.44
   7   9  -3   66.59    5.61
   7  -9   3   65.58    6.78
   8   9   3  976.18   60.12
   8  -9  -3  966.29   61.79
   8   9  -3 1020.42   61.22
   8  -9   3 1028.63   62.03
   9  -9  -3   35.52    5.69
   9   9  -3   44.16    4.77
   9  -9   3   44.59    5.81
  10  -9  -3   25.27    4.91
  10   9   3   22.13    2.86
  10  -9   3   18.91    5.01
  10   9  -3   19.48    3.60
  11   9   3    9.89    2.19
  11  -9  -3    9.69    3.72
  11  -9   3    1.53    3.24
  11   9  -3    6.71    2.59
  12  -9  -3   71.91    7.87
  12   9   3   70.15    6.33
  12  -9   3   87.54    8.54
  12   9  -3   78.52    7.15
  13   9   3   43.57    4.75
  13  -9  -3   35.72    6.34
  13   9  -3   44.87    5.74
  13  -9   3   37.36    6.21
  14  -9  -3   -6.96    3.15
  14   9   3    2.59    2.68
  14  -9   3    8.51    4.53
  14   9  -3    2.55    2.82
  15   9   3    1.49    2.81
  15  -9  -3   13.97    4.86
  15   9  -3   -0.08    2.81
  15  -9   3   -4.26    3.97
  16  -9  -3   24.79    6.47
  16   9   3   30.28    4.62
  16   9  -3   14.75    4.26
  16  -9   3   30.02    6.75
  17   9   3   87.01   10.39
  17  -9  -3   79.32   15.51
  17   9  -3   85.13    8.92
   0  -9   4   -0.85    1.14
   0  -9  -4    2.21    1.02
  -1  -9   4   43.95    3.80
  -1   9   4   36.48    3.51
   1  -9   4   35.60    3.72
  -1  -9  -4   38.17    2.90
   2  -9  -4   72.76    5.63
  -2  -9   4   72.27    5.73
   2   9  -4   73.57    5.65
  -3  -9   4  355.44   22.28
   3  -9  -4  340.57   22.27
   3   9  -4  353.52   22.22
  -3   9   4  354.55   22.30
  -4  -9   4  117.87    8.22
   4  -9  -4  115.66    8.51
   4   9  -4  109.40    8.21
   5  -9  -4  130.84    9.89
  -5  -9   4  136.55    9.44
   5   9  -4  138.46    9.52
   5  -9   4  130.20   10.26
  -6  -9   4   34.91    4.29
   6  -9  -4   40.21    4.83
   6   9  -4   40.91    4.18
   6  -9   4   47.82    5.24
   7  -9  -4    9.68    4.75
   7  -9   4    5.84    2.98
   7   9  -4    7.94    2.25
   8  -9  -4  395.32   26.75
   8  -9   4  404.49   27.03
   8   9  -4  421.26   26.25
   9   9   4   76.39    5.63
   9  -9  -4   87.15    7.96
   9   9  -4   79.38    6.95
   9  -9   4   76.92    8.17
  10   9   4   18.31    2.45
  10  -9  -4    7.98    3.51
  10   9  -4   13.25    3.17
  10  -9   4   17.18    4.19
  11   9   4    3.24    1.83
  11  -9  -4    4.18    3.53
  11   9  -4   -0.16    2.25
  11  -9   4    0.90    3.14
  12   9   4   10.33    2.44
  12  -9  -4   15.61    4.44
  12   9  -4   11.87    3.22
  12  -9   4   11.69    4.09
  13  -9  -4    2.87    3.75
  13   9   4   -0.35    2.13
  13  -9   4    5.17    3.33
  13   9  -4    4.76    2.58
  14   9   4    9.06    2.74
  14  -9  -4    6.73    3.71
  14   9  -4    4.94    2.78
  14  -9   4   -4.30    3.84
  15   9   4   13.17    3.59
  15  -9  -4   14.24    5.12
  15   9  -4   23.91    4.60
  15  -9   4    6.11    4.78
  16   9   4    0.93    3.21
  16  -9  -4    5.97    5.08
  16  -9   4   -0.82    4.85
  16   9  -4    7.37    3.76
  17  -9  -4   16.80    6.10
  17   9  -4   25.41    4.85
  17  -9   4    9.77    7.01
   0  -9  -5    1.66    1.04
   0   9   5    0.47    1.15
  -1  -9   5   33.14    4.06
   1  -9  -5   34.08    3.55
  -1  -9  -5   39.18    2.85
   1   9  -5   32.12    3.62
  -1   9   5   38.85    3.53
  -2  -9   5 1611.74  100.91
   2  -9  -5 1666.13  100.57
   2   9  -5 1675.30  100.82
  -2   9   5 1719.02  100.96
   3  -9  -5  739.42   44.19
  -3  -9   5  675.04   44.24
   3   9  -5  732.31   44.28
  -3   9   5  724.15   44.13
   4  -9  -5   53.24    4.93
   4   9  -5   47.93    4.58
   5  -9  -5  725.70   44.82
   5   9  -5  717.31   44.63
   6  -9  -5  832.17   52.36
   6   9  -5  839.06   52.17
   6  -9   5  865.77   53.64
   7  -9  -5  101.23    9.45
   7   9  -5  107.71    8.30
   7  -9   5  103.49    9.04
   8  -9  -5  141.67   10.65
   8   9  -5  116.29    9.70
   8  -9   5  130.77   10.82
   9  -9  -5   90.21    8.34
   9   9   5   86.13    6.01
   9  -9   5   82.91    8.64
   9   9  -5   89.43    7.59
  10  -9  -5   83.81    8.29
  10  -9   5   89.31    8.64
  11  -9  -5   42.94    6.01
  11   9   5   35.17    3.73
  11  -9   5   39.24    6.32
  11   9  -5   40.20    5.41
  12   9   5   20.36    3.14
  12  -9  -5   21.67    4.65
  12   9  -5   20.25    4.32
  12  -9   5   28.49    5.48
  13  -9  -5   59.31    8.21
  13   9   5   51.23    5.27
  13   9  -5   52.55    6.37
  13  -9   5   46.84    7.50
  14   9   5    5.00    2.60
  14  -9  -5    3.01    4.08
  14   9  -5    7.91    2.85
  14  -9   5    4.04    4.08
  15  -9  -5   59.02    8.81
  15  -9   5   67.28    8.91
  15   9  -5   51.60    7.09
  16   9   5    4.17    4.01
  16  -9  -5    1.00    4.56
  16  -9   5   -4.42    4.30
  16   9  -5    2.46    3.34
  17  -9  -5    5.85    5.42
  17  -9   5   -4.74    5.17
  17   9  -5    6.81    4.37
   0   9   6    1.42    1.23
   0  -9  -6    0.71    1.07
   1  -9  -6   59.87    4.99
   1   9   6   63.70    4.54
  -1   9   6   66.24    5.07
   1   9  -6   68.07    5.52
  -1  -9  -6   64.48    4.54
   2  -9  -6  734.85   46.55
   2   9  -6  801.93   46.97
  -2   9   6  746.98   46.48
   3  -9  -6   38.74    4.06
  -3   9   6   41.11    4.21
   3   9  -6   40.91    4.10
   4  -9  -6   23.63    3.41
   4   9  -6   30.06    3.94
   5  -9  -6  434.29   28.96
   5   9  -6  475.45   29.01
   6  -9  -6  137.28   11.18
   6   9  -6  168.48   11.34
   7  -9  -6  298.80   20.18
   7  -9   6  302.33   20.43
   7   9  -6  289.08   19.80
   8  -9  -6    2.01    2.56
   8  -9   6    1.11    2.75
   8   9  -6    2.82    2.28
   9  -9  -6   16.96    4.00
   9  -9   6   13.63    3.96
  10   9   6    1.33    1.49
  10  -9  -6    3.44    3.21
  10  -9   6    1.15    3.42
  10   9  -6    3.01    2.45
  11   9   6   48.25    4.51
  11  -9  -6   56.01    7.41
  11   9  -6   64.96    6.48
  11  -9   6   55.76    7.31
  12  -9  -6    2.27    3.73
  12   9   6    1.03    1.73
  12   9  -6    7.36    2.85
  13  -9  -6   14.60    4.81
  13   9   6   22.36    3.37
  13   9  -6   24.45    4.71
  13  -9   6   29.05    5.79
  14   9   6   14.60    3.28
  14  -9  -6    8.53    4.17
  14   9  -6   12.84    3.74
  14  -9   6   12.53    4.78
  15  -9  -6   96.89   10.77
  15   9   6   94.06    8.28
  15  -9   6   87.16   10.63
  15   9  -6   92.11   10.14
  16  -9  -6   19.86    6.07
  16   9  -6   13.30    4.68
  16  -9   6   16.25    6.43
  17  -9  -6    9.35    5.36
  17  -9   6   17.27    6.68
  17   9  -6   20.44    5.56
   0  -9  -7    0.34    1.18
   0   9   7   -0.81    1.10
   1   9   7   95.64    6.72
   1  -9  -7  103.50    7.31
  -1   9   7  114.56    7.55
   1   9  -7   94.39    7.70
  -1  -9  -7   99.52    6.84
   2  -9  -7  353.88   22.44
   2   9  -7  338.87   22.75
  -2   9   7  366.15   22.38
   3  -9  -7   35.17    4.10
   3   9  -7   47.45    4.48
   4  -9  -7   58.18    5.11
   4   9  -7   43.44    4.84
   5  -9  -7 1294.67   78.04
   5   9  -7 1256.60   78.01
   6  -9  -7   11.14    2.89
   6   9  -7    4.34    2.44
   7  -9  -7  571.46   35.19
   7   9  -7  523.00   34.82
   8  -9  -7    2.86    2.65
   8  -9   7    4.75    3.30
   8   9  -7    3.52    2.49
   9  -9  -7    2.88    3.05
   9   9  -7   -0.91    2.12
   9  -9   7   -0.66    2.94
  10  -9  -7  140.44   11.21
  10   9   7  135.99    9.09
  10   9   7  122.45    8.74
  10   9  -7  142.35   10.73
  10  -9   7  119.32   11.01
  11   9   7    7.88    2.18
  11  -9  -7    8.96    3.77
  11   9   7    9.49    2.11
  11   9  -7    7.01    3.12
  11  -9   7   16.89    4.61
  12  -9  -7   97.24   14.30
  12   9   7   87.55    7.00
  12   9  -7  109.98    9.25
  12  -9   7   93.60    9.75
  13   9   7    1.80    2.23
  13  -9  -7   11.07    4.41
  13  -9   7   10.73    4.20
  13   9  -7    3.91    3.14
  14   9   7   33.75    4.32
  14  -9  -7   25.21    6.08
  14  -9   7   38.80    7.13
  14   9  -7   35.78    5.58
  15  -9  -7  211.56   17.21
  15  -9   7  200.03   17.12
  15   9  -7  219.90   16.35
  16  -9  -7   36.32    9.06
  16   9  -7   47.56    6.85
  16  -9   7   39.59    7.85
  17  -9  -7   99.88   11.87
  17  -9   7   93.67   11.66
  17   9  -7  107.41   11.04
   0  -9  -8    1.42    1.27
   0   9   8    1.64    1.44
   0   9  -8    1.12    1.34
   1   9   8   12.40    1.87
   1  -9  -8    9.56    2.00
   1   9  -8   16.87    2.85
  -1   9   8   15.90    2.46
  -1  -9  -8   13.87    2.11
   2   9   8    6.16    1.24
   2  -9  -8    4.29    1.81
   2   9  -8    2.69    1.78
  -2  -9  -8    5.84    1.28
  -2   9   8    6.07    2.09
   3  -9  -8   66.48    6.17
   3   9  -8   81.48    6.64
   4  -9  -8   52.43    5.06
   4   9  -8   41.73    4.99
   5  -9  -8  535.73   35.20
   5   9  -8  576.88   35.42
   6  -9  -8   -1.31    2.93
   6   9  -8    1.04    2.33
   7  -9  -8  128.53   10.81
   7   9  -8  142.26   10.76
   8  -9  -8   26.71    4.64
   8  -9   8   20.43    4.62
   8   9  -8   15.07    3.49
   9  -9  -8    0.34    2.93
   9  -9   8    8.52    3.53
   9   9  -8    4.18    2.61
  10  -9  -8    0.71    2.96
  10   9   8    1.70    1.54
  10   9   8    0.01    2.14
  10   9  -8    1.76    2.33
  10  -9   8    2.34    2.28
  11  -9  -8    0.13    3.41
  11   9   8    2.53    1.69
  11   9   8    2.34    2.07
  11  -9   8   -2.56    2.96
  11   9  -8   -0.12    2.62
  12   9   8   32.08    3.82
  12  -9  -8   32.16    6.19
  12  -9   8   36.08    6.58
  12   9  -8   32.41    5.61
  13   9   8   39.25    4.50
  13  -9  -8   40.02    6.85
  13   9  -8   38.14    5.94
  13  -9   8   39.61    7.02
  14   9   8   -4.91    2.36
  14  -9  -8    0.74    3.83
  14  -9   8    3.35    4.96
  14   9  -8   -2.33    5.55
  15  -9  -8   27.32    6.23
  15   9  -8   40.41    6.09
  15  -9   8   44.33    7.66
  16  -9  -8    5.05    6.16
  16   9  -8    0.97    3.72
   0  -9  -9   -1.24    1.27
   0   9  -9    1.28    1.60
   1  -9  -9   -2.83    1.36
   1   9   9   -0.33    1.21
  -1  -9  -9    1.22    1.39
   1   9  -9   -1.27    1.42
  -1   9   9    1.44    1.65
   2  -9  -9  494.18   30.70
   2   9   9  493.24   29.79
  -2  -9  -9  491.88   29.87
   2   9  -9  465.66   31.04
   3   9   9  230.17   14.28
   3  -9  -9  239.17   15.62
   3   9  -9  215.82   15.80
   4  -9  -9  457.08   29.34
   5  -9  -9  540.15   33.67
   5   9  -9  511.01   33.67
   6  -9  -9   10.95    3.43
   6   9  -9   12.03    3.12
   7  -9  -9  172.81   12.28
   7   9  -9  136.95   11.77
   8  -9  -9   41.02    6.12
   8   9  -9   44.97    6.00
   9  -9  -9    6.26    2.76
   9   9  -9    1.48    2.51
   9  -9   9   -3.31    3.06
  10  -9  -9   67.35    7.30
  10   9   9   52.57    4.62
  10  -9   9   43.17    6.82
  10   9  -9   55.33    6.60
  11  -9  -9   45.49    7.48
  11   9   9   37.69    3.82
  11   9  -9   37.94    5.68
  11  -9   9   44.75    9.33
  12   9   9   28.21    3.29
  12  -9  -9   25.26    5.24
  12  -9   9   15.55    4.98
  12   9  -9   26.29    4.79
  13  -9  -9  148.94   13.00
  13   9   9  137.86   10.12
  13  -9   9  141.32   12.97
  13   9  -9  144.67   13.61
  14  -9  -9    2.39    4.08
  14  -9   9   -3.62    4.61
  14   9  -9    5.73    3.51
  15  -9  -9   89.76   10.05
  15  -9   9   86.21   10.33
  15   9  -9   74.65    8.96
  16  -9  -9    4.98    5.42
  16   9  -9   14.74    4.95
  16  -9   9   15.05    6.21
   0   9  10    0.85    1.48
   0  -9 -10   -0.91    1.45
   0   9 -10    0.43    1.59
   1  -9 -10   35.15    3.97
   1   9  10   28.25    5.14
  -1   9  10   36.55    4.40
   1   9 -10   39.83    4.44
  -1  -9 -10   35.53    3.58
   2   9  10   10.83    1.94
   2  -9 -10   16.94    2.99
  -2  -9 -10   10.57    2.85
   2   9 -10   16.77    3.29
   3   9  10  144.84    9.77
   3  -9 -10  147.18   10.99
   3   9 -10  156.42   11.38
  -3  -9 -10  154.37    9.85
   4  -9 -10   24.67    4.00
   4   9  10   22.97    2.48
   4   9 -10   24.96    4.06
   5  -9 -10  135.18   13.22
   5   9 -10  185.54   12.58
   6  -9 -10    5.36    2.73
   6   9 -10    3.56    2.32
   7  -9 -10    7.40    3.14
   7   9 -10    6.23    2.81
   8  -9 -10   13.24    3.75
   8   9 -10   11.12    3.22
   9   9  10    2.83    1.67
   9  -9 -10    4.30    3.06
   9  -9  10    3.12    3.11
   9   9 -10    3.07    2.78
  10  -9 -10    0.40    3.16
  10   9  10   -0.80    1.83
  10   9 -10    2.05    2.97
  10  -9  10   -0.48    3.33
  11  -9 -10    4.02    3.24
  11   9  10    3.46    1.85
  11  -9  10    6.74    3.67
  11   9 -10   -1.46    2.56
  12   9  10   19.03    2.80
  12  -9 -10   28.39    5.58
  12   9 -10   24.74    4.99
  12  -9  10   19.82    5.61
  13  -9 -10   23.29    5.23
  13   9  10    4.79    3.11
  13   9 -10    8.69    3.79
  13  -9  10    5.01    4.39
  14  -9 -10    9.78    4.96
  14  -9  10    6.18    5.46
  14   9 -10    9.44    4.18
  15  -9 -10   27.57    6.70
  15  -9  10   26.68    6.32
  15   9 -10   13.91    4.58
  16  -9 -10    4.11    5.18
  16   9 -10    0.92    4.48
  16  -9  10    9.21    5.87
   0  -9 -11    0.06    1.49
   0   9 -11    1.04    1.98
   0   9  11   -0.06    1.73
   1   9  11   32.84    3.58
   1  -9 -11   31.57    3.92
  -1  -9 -11   33.93    3.76
   1   9 -11   35.11    4.64
   2  -9 -11  124.23    9.27
  -2  -9 -11  119.86    8.41
   2   9 -11  109.43    9.42
   3   9  11   82.76    6.03
   3  -9 -11   75.53    7.08
  -3  -9 -11   89.03    6.10
   3   9 -11   74.93    7.40
   4   9  11   98.38    6.92
   4  -9 -11  102.51    8.45
   4   9 -11   94.84    8.50
   5  -9 -11  112.13    9.54
   5   9  11  116.14    7.76
   5   9 -11  110.89    9.58
   6  -9 -11    2.92    2.58
   6   9  11    0.42    1.39
   6   9  11    1.28    1.50
   6   9 -11   -2.38    2.00
   7  -9 -11   -1.69    2.53
   7   9  11   -0.36    1.48
   7   9  11    0.85    1.44
   7   9 -11    0.47    2.45
   8  -9 -11  283.42   19.03
   8   9 -11  239.40   18.60
   9   9  11   43.35    4.24
   9  -9 -11   49.33    6.89
   9   9 -11   34.22    5.76
  10  -9 -11    8.43    3.67
  10   9  11   10.79    2.11
  10  -9  11   11.56    4.40
  10   9 -11   12.75    3.76
  11   9  11   44.26    4.32
  11  -9 -11   51.31    7.45
  11   9 -11   46.72    6.91
  11  -9  11   54.86    7.73
  12  -9 -11    3.86    3.43
  12   9  11    1.23    2.00
  12   9 -11    1.80    3.34
  12  -9  11    7.00    4.32
  13  -9 -11    8.34    4.24
  13   9 -11   11.53    4.14
  13  -9  11    7.12    4.70
  14  -9 -11   12.64    5.10
  14   9 -11   13.01    4.62
  14  -9  11   10.21    6.00
  15  -9 -11    6.04    5.72
  15   9 -11    3.13    4.36
   0  -9 -12    1.51    1.91
   0   9 -12    2.29    2.33
   1   9  12   13.12    2.52
   1  -9 -12   18.84    3.33
  -1  -9 -12   14.09    2.74
   1   9 -12   12.77    3.10
   2  -9 -12    1.92    2.16
   2   9  12    0.79    1.68
  -2  -9 -12    2.38    1.73
   2   9 -12    0.34    1.97
   3  -9 -12    8.08    2.84
   3   9  12    9.81    2.16
   3   9 -12    8.32    2.63
  -3  -9 -12    9.03    2.11
   4  -9 -12    0.18    2.23
   4   9  12    2.19    1.64
   4   9 -12    2.09    2.27
   5  -9 -12   -1.82    2.58
   5   9  12    3.77    1.84
   5   9 -12    3.68    2.72
   6   9  12    9.21    1.94
   6  -9 -12    8.62    3.55
   6   9 -12    6.84    2.95
   7   9  12    1.43    1.73
   7  -9 -12   -1.37    2.69
   7   9  12    0.41    1.76
   7   9 -12    6.54    2.84
   8   9  12   11.80    2.18
   8   9  12    9.25    2.30
   8  -9 -12   19.04    4.28
   8   9 -12    9.98    3.52
   9  -9 -12   17.07    4.38
   9   9  12   11.69    2.13
   9   9 -12   22.47    4.70
  10   9  12   -0.87    1.64
  10  -9 -12   -2.83    3.20
  10   9 -12    3.45    3.07
  10  -9  12    0.05    3.50
  11  -9 -12    9.32    4.23
  11   9  12    3.24    2.06
  11   9 -12    3.31    3.45
  11  -9  12    8.02    4.35
  12  -9 -12   -2.40    3.66
  12   9 -12   -3.95    3.30
  12  -9  12    1.47    3.61
  13  -9 -12    2.86    4.38
  13   9 -12    9.60    4.13
  13  -9  12    3.47    4.83
  14  -9 -12    0.96    4.78
  14  -9  12    9.53    5.24
  14   9 -12    2.70    4.03
  15  -9 -12   -1.85    4.69
  15   9 -12    1.00    4.42
  15  -9  12    3.36    5.76
   0  -9 -13   -1.12    1.87
   0   9 -13    1.20    2.08
   1  -9 -13   80.26    7.14
   1   9 -13   75.32    7.40
  -1  -9 -13   80.22    6.71
   2  -9 -13  112.14    8.64
  -2  -9 -13  104.83    7.75
   2   9 -13   84.32    8.54
   3  -9 -13   93.86    8.11
   3   9  13   86.12    6.93
  -3  -9 -13   89.08    6.91
   3   9 -13   88.64    8.20
   4   9  13  100.04    7.75
   4  -9 -13  107.05    9.18
   4   9 -13  106.13    9.19
   5  -9 -13   31.65    5.26
   5   9  13   31.65    3.71
   5   9 -13   28.21    5.09
   6  -9 -13   -0.98    2.88
   6   9 -13    1.46    2.64
   7  -9 -13   27.66    5.19
   7   9  13   33.37    3.67
   7   9 -13   23.36    5.00
   8   9  13    8.64    2.17
   8  -9 -13   11.97    3.79
   8   9 -13    7.83    3.59
   9   9  13   -0.21    1.76
   9  -9 -13    4.93    3.69
   9   9 -13    3.72    3.68
  10  -9 -13   34.57    6.33
  10   9  13   34.25    3.78
  10   9 -13   44.67    6.93
  10  -9  13   34.83    6.59
  11  -9 -13   -2.91    3.50
  11   9  13   -0.71    2.88
  11  -9  13    9.53    4.36
  11   9 -13   -1.58    3.17
  12  -9 -13   20.97    5.44
  12  -9  13   22.45    5.64
  12   9 -13   22.85    5.23
  13  -9 -13    6.72    4.97
  13  -9  13    0.19    4.50
  13   9 -13    4.65    4.42
  14  -9 -13   12.89    6.20
  14   9 -13   11.38    5.23
   0  -9 -14    3.12    2.28
   0   9 -14   -5.80    1.76
   1  -9 -14    6.08    2.87
   1   9 -14    6.08    2.71
  -1  -9 -14    5.55    2.35
   2  -9 -14   13.04    3.36
  -2  -9 -14   12.33    2.69
   2   9 -14    6.01    2.97
   3  -9 -14    0.06    2.58
   3   9 -14   -2.59    2.40
  -3  -9 -14    0.95    1.95
   4  -9 -14   10.91    3.52
   4   9 -14    4.87    2.93
   5  -9 -14   26.67    4.80
   5   9  14   22.73    3.57
   5   9 -14   30.13    4.76
   6   9  14    6.54    2.59
   6  -9 -14    2.14    2.96
   6   9 -14   -1.86    2.50
   7  -9 -14    0.77    3.41
   7   9 -14    2.85    2.73
   8  -9 -14   -0.37    3.22
   8   9  14    3.24    2.27
   8   9 -14    9.54    5.80
   9   9  14    1.13    2.06
   9  -9 -14   -3.02    3.44
   9   9 -14    2.99    3.35
  10  -9 -14    4.64    4.15
  10   9  14   -2.20    2.11
  10   9 -14    4.92    3.42
  11  -9 -14    9.23    4.48
  11   9 -14   10.86    4.31
  11  -9  14    6.14    4.47
  12  -9 -14   14.14    5.24
  12   9 -14   14.00    5.25
  12  -9  14   18.43    6.02
  13  -9 -14   -0.64    4.46
  13   9 -14    1.42    4.16
  13  -9  14   -1.72    4.96
  14  -9 -14    0.67    5.03
  14   9 -14    5.16    5.74
  14  -9  14    8.81    5.64
   0   9 -15   -0.53    2.02
   0  -9 -15    1.80    2.31
   1  -9 -15   99.72    8.42
   1   9 -15   86.42    8.39
  -1  -9 -15   87.75    7.81
   2  -9 -15   56.02    6.47
  -2  -9 -15   61.98    5.79
   2   9 -15   54.52    6.44
   3  -9 -15  132.93   10.77
  -3  -9 -15  138.66    9.87
   3   9 -15  116.79   10.96
   4  -9 -15   53.57    6.98
   4   9 -15   55.13    6.74
   5  -9 -15   99.26    9.33
   5   9 -15   99.23    9.64
   6  -9 -15   51.56    7.19
   7  -9 -15  114.86   10.69
   7   9 -15  117.63   10.99
   8  -9 -15    5.57    4.14
   8   9  15    6.63    2.57
   8   9 -15    1.79    3.25
   9  -9 -15    3.24    3.56
   9   9  15   -0.76    2.51
   9   9 -15    5.79    3.40
  10  -9 -15  139.63   12.49
  10   9 -15  119.25   12.02
  11  -9 -15   20.38    5.61
  11   9 -15   20.10    5.38
  11  -9  15   11.38    5.69
  12  -9 -15    8.37    4.36
  12   9 -15    2.18    4.82
  12  -9  15    2.74    4.66
  13  -9 -15    0.61    4.46
  13   9 -15    5.15    4.64
  13  -9  15    7.57    5.17
   0   9 -16    0.91    2.19
   0  -9 -16    1.05    2.53
   1  -9 -16    3.81    2.45
   1   9 -16    4.30    2.90
  -1  -9 -16    8.64    3.72
   2  -9 -16    8.48    3.36
  -2  -9 -16    8.81    2.94
   2   9 -16    6.25    3.22
   3  -9 -16   -4.19    2.61
  -3  -9 -16    5.49    2.68
   4  -9 -16    5.68    3.33
   4   9 -16    8.16    3.99
   5  -9 -16    5.06    3.26
   5   9 -16    3.62    3.19
   6  -9 -16   31.18    6.16
   6   9 -16   35.44    6.46
   7   9 -16    3.01    3.55
   8  -9 -16   15.67    5.00
   8   9  16   18.31    3.57
   8   9 -16   17.86    4.78
   9   9  16   -0.54    4.77
   9  -9 -16   -4.96    3.27
   9   9 -16    4.57    3.35
  10  -9 -16  132.76   12.62
  10   9 -16  128.78   12.40
  11  -9 -16    8.41    4.72
  11   9 -16    1.05    4.38
  11  -9  16    8.31    5.19
  12  -9 -16    3.35    8.62
  12   9 -16    3.26    4.58
  12  -9  16    0.88    6.72
   0  -9 -17   -3.28    2.72
   0   9 -17   -2.96    2.33
   1  -9 -17    2.41    3.03
  -1  -9 -17    4.23    2.95
   1   9 -17    3.65    2.37
   2  -9 -17    0.25    2.97
  -2  -9 -17    3.40    2.64
   2   9 -17    2.22    2.75
   3  -9 -17   37.35    5.95
  -3  -9 -17   34.77    5.35
   3   9 -17   35.01    6.04
   4  -9 -17   11.60    4.18
   4   9 -17    1.14    3.07
   5  -9 -17   53.35    7.61
   5   9 -17   59.81    8.09
   6   9 -17    4.56    4.01
   7  -9 -17   14.12    4.72
   7   9 -17   20.67    4.94
   8  -9 -17  100.12   10.71
   8   9  17   92.62    8.70
   8   9 -17  109.05   10.67
   9  -9 -17    7.08    4.55
   9   9 -17   -0.39    4.07
  10  -9 -17   32.47    6.91
  10   9 -17   22.74    5.92
  11  -9 -17   35.87    7.83
  11   9 -17   30.66    7.59
   0   9 -18   -1.48    2.59
   0  -9 -18    0.79    3.00
   1  -9 -18    7.74    3.35
   1   9 -18    7.61    3.65
  -1  -9 -18    6.89    3.28
   2  -9 -18   -0.06    3.27
  -2  -9 -18   -6.80    2.72
   2   9 -18    1.34    3.03
   3  -9 -18    7.44    3.44
   3   9 -18    5.63    3.60
   4  -9 -18   32.10    5.76
   4   9 -18   33.60    5.91
   5   9 -18   19.96    5.11
   6  -9 -18   -4.48    3.89
   6   9 -18   -3.46    3.18
   7  -9 -18    6.17    4.53
   7   9 -18   -3.33    3.50
   8  -9 -18  107.39   11.79
   8   9 -18  124.96   11.93
   9  -9 -18    6.01    5.20
   9   9 -18    0.73    4.18
  10  -9 -18   -0.48    5.22
  11  -9 -18   13.86    6.15
  11   9 -18    3.36    4.94
   0   9 -19    3.11    2.92
   0  -9 -19    1.67    3.02
   1  -9 -19   21.77    4.99
   1   9 -19   10.81    4.37
  -1  -9 -19   22.79    4.74
   2  -9 -19   19.83    4.49
  -2  -9 -19   13.41    3.88
   2   9 -19    9.82    3.80
   3  -9 -19   21.26    5.51
   3   9 -19   29.72    5.95
   4  -9 -19   27.53    7.96
   4   9 -19   17.59    4.88
   5  -9 -19   80.89    9.35
   5   9 -19   87.75    9.74
   6  -9 -19   10.08    5.05
   6   9 -19   19.14    5.09
   7  -9 -19    8.05    4.81
   7   9 -19   -0.93    4.27
   8  -9 -19   46.80    8.31
   8   9 -19   38.49    7.59
   9  -9 -19   23.37    6.70
   9   9 -19   32.63    7.12
   0  -9 -20   -2.93    3.63
   1  -9 -20   28.59    5.28
  -1  -9 -20   27.51    5.05
   1   9 -20   23.53    5.42
   2  -9 -20   33.89    6.38
  -2  -9 -20   37.77    5.56
   2   9 -20   38.68    7.00
   3  -9 -20   12.78    4.61
   3   9 -20    6.12    4.03
   4  -9 -20   -1.17    4.41
   4   9 -20   -1.06    3.77
   5  -9 -20    4.78    4.26
   5   9 -20   10.16    4.13
   6  -9 -20    8.28    4.64
   6   9 -20   14.50    5.10
   7  -9 -20    6.11    5.43
   7   9 -20   11.68    6.36
   8  -9 -20    2.65    5.44
   8   9 -20    5.35    4.73
   0  -9 -21   -5.60    3.58
   1  -9 -21   73.06   12.12
  -1  -9 -21   64.78    7.66
   1   9 -21   54.35    8.08
   2  -9 -21   24.50    5.06
   2   9 -21    9.18    4.67
  -2  -9 -21   12.43    4.72
   3  -9 -21   24.42    5.40
   3   9 -21   12.60    4.58
   4  -9 -21    0.77    4.22
   5  -9 -21    6.30    5.10
   5   9 -21   15.85    5.54
   6  -9 -21   -1.71    4.85
   6   9 -21    4.15    4.69
   7  -9 -21   48.00    8.41
   7   9 -21   38.81    7.89
   0  -9 -22    2.11    4.44
   1  -9 -22   20.05    5.44
  -1  -9 -22   24.64    6.13
   1   9 -22   16.44    5.18
   2  -9 -22    3.45    4.90
  -2  -9 -22    1.12    4.72
   2   9 -22    4.35    4.65
   3  -9 -22   16.12    5.42
   3   9 -22    0.79    4.50
   4  -9 -22    7.42    5.24
   4   9 -22    0.29    4.12
   0 -10   0   48.17    4.21
   0 -10   0   47.73    3.93
  -1 -10   0    0.49    0.99
   1 -10   0   -1.94    1.40
   2 -10   0   39.28    4.10
  -2 -10   0   40.36    3.26
   3 -10   0    3.90    1.94
  -3 -10   0    0.55    0.81
  -4 -10   0    7.83    1.38
   4 -10   0   10.39    2.66
   5  10   0    0.20    0.73
   5 -10   0   -0.25    2.12
  -5 -10   0    0.00    0.93
   6 -10   0    2.37    2.41
   6  10   0    0.50    1.03
  -6 -10   0    1.43    1.14
   7 -10   0   -1.83    2.58
   7  10   0   -0.43    1.39
  -7 -10   0   -0.73    1.47
  -8 -10   0   22.01    2.92
   8 -10   0   30.25    4.87
   8  10   0   23.22    2.81
   9  10   0   -1.90    1.27
   9 -10   0    0.98    3.29
  -9 -10   0   -0.87    1.83
  10  10   0    8.95    2.26
  10 -10   0    4.95    3.61
 -10 -10   0    1.76    2.33
  11 -10   0   -0.50    3.09
  11  10   0   -1.17    1.74
  12  10   0   17.04    3.27
  12 -10   0   22.18    5.18
  13  10   0   -2.28    2.17
  13 -10   0    1.95    3.72
  14  10   0    0.28    2.36
  14 -10   0    7.67    4.01
  15  10   0   -6.93    2.83
  15 -10   0   -1.51    4.03
  16 -10   0    9.82    5.09
  16  10   0    7.75    3.31
  17 -10   0   -5.30    4.79
  17  10   0    4.97    3.68
   0 -10  -1    1.20    1.41
   0 -10   1    1.18    1.17
   1 -10  -1    2.54    1.64
  -1 -10   1    1.71    1.20
  -1 -10  -1    3.29    1.20
  -1 -10  -1    2.84    1.40
  -2 -10   1   43.80    3.60
   2 -10  -1   42.16    4.21
  -2 -10  -1   43.74    3.39
   2 -10   1   44.39    4.39
  -2 -10  -1   40.71    3.21
   3 -10  -1  209.16   13.28
  -3 -10   1  179.43   12.48
  -3 -10  -1  194.29   12.12
   3 -10   1  205.03   13.39
   4 -10  -1   96.34    7.62
  -4 -10   1   93.25    6.63
   4 -10   1   93.76    7.72
   4  10  -1  103.30    6.71
  -5 -10   1  340.93   21.00
   5 -10  -1  349.95   22.09
   5 -10   1  335.09   22.12
   5  10  -1  327.29   21.08
  -6 -10   1   54.08    4.48
   6 -10  -1   57.40    5.97
   6  10   1   55.01    4.03
   6 -10   1   65.40    6.16
  -6 -10  -1   60.62    4.08
   6  10  -1   54.82    4.54
   7 -10  -1  189.43   14.56
   7  10   1  180.56   11.91
  -7 -10   1  195.16   12.28
  -7 -10  -1  187.48   11.88
   7  10  -1  175.02   12.33
   7 -10   1  201.65   13.78
   8  10   1    2.52    1.39
  -8 -10   1    1.98    1.62
   8 -10  -1    0.31    2.73
   8 -10   1    6.92    3.40
  -8 -10  -1    0.43    1.52
   8  10  -1   -1.00    1.41
   9 -10  -1   97.50    8.77
  -9 -10   1   87.40    7.14
   9  10   1   91.77    6.84
   9 -10   1  103.88    8.98
   9  10  -1   95.24    7.15
  -9 -10  -1   89.95    6.79
  10 -10  -1   40.62    6.02
  10  10   1   45.65    4.20
 -10 -10  -1   39.77    4.48
  10  10  -1   38.14    4.51
  10 -10   1   54.65    6.88
  11  10   1    2.30    1.65
  11 -10  -1    5.40    3.68
  11 -10   1    3.10    3.21
  11  10  -1    1.23    2.01
 -11 -10  -1    0.20    4.25
  12 -10  -1    5.55    4.16
  12  10   1    0.00    2.03
  12  10  -1   -0.98    2.09
  12 -10   1    7.94    3.88
  13 -10  -1   11.79    4.59
  13  10   1    5.07    2.43
  13 -10   1    4.75    4.15
  14 -10  -1   -3.31    3.52
  14 -10   1   -3.72    3.19
  14  10  -1   -0.28    2.48
  15  10   1    3.55    2.95
  15 -10  -1    6.74    4.70
  15 -10   1    7.40    4.42
  15  10  -1    4.33    3.22
  16  10   1    0.11    3.14
  16 -10  -1   -1.28    5.16
  16  10  -1    3.41    3.38
  16 -10   1   -1.08    4.77
  17 -10  -1    4.15    5.21
  17  10  -1    9.78    3.94
  17 -10   1    5.71    5.56
   0 -10  -2   35.39    3.37
   0 -10   2   41.37    3.60
   1 -10  -2   40.92    3.84
  -1 -10   2   45.20    4.08
  -1 -10  -2   41.70    3.21
  -1 -10  -2   38.47    3.36
   1 -10   2   46.03    3.91
  -2 -10   2    4.04    1.35
   2 -10  -2    1.07    1.64
   3 -10  -2   69.08    6.13
  -3 -10   2   68.90    5.55
   3  10  -2   83.48    5.61
   3 -10   2   81.52    6.59
   4 -10  -2    0.47    2.03
  -4 -10   2    1.40    1.16
   4 -10   2   -1.85    1.88
   4  10  -2   -0.12    1.11
   5 -10  -2   41.03    5.11
  -5 -10   2   50.98    4.09
   5  10  -2   48.08    4.07
   5 -10   2   48.26    5.30
   6 -10  -2    9.59    3.02
   6  10  -2    4.53    1.51
   6 -10   2    2.53    2.64
   7 -10  -2    6.07    3.64
  -7 -10   2   11.60    2.13
   7 -10   2   12.05    3.45
   7  10  -2    9.10    2.19
   8 -10  -2   11.76    3.74
  -8 -10   2   12.80    2.62
   8  10   2   12.58    1.81
   8  10  -2   14.86    2.62
   8 -10   2   10.08    3.80
   9 -10  -2   17.81    4.30
   9  10  -2   22.09    3.43
   9 -10   2   22.44    4.56
  10  10   2    0.79    1.48
  10 -10  -2    0.46    3.15
  10  10  -2    0.21    1.93
  10 -10   2   -1.24    3.15
  11  10   2    2.21    1.70
  11 -10  -2   -4.17    2.88
  11  10  -2    1.14    2.26
  11 -10   2    0.97    3.34
  12 -10  -2    4.63    3.87
  12  10   2   -0.65    1.85
  12  10  -2    1.85    2.28
  12 -10   2    7.65    4.20
  13  10   2   10.26    2.83
  13 -10  -2   17.25    5.06
  13  10  -2   10.36    3.28
  13 -10   2   22.67    5.12
  14 -10  -2    1.85    3.99
  14  10   2   -0.31    2.35
  14  10  -2   -1.50    2.46
  14 -10   2    6.60    4.14
  15 -10  -2    1.41    4.10
  15  10   2   -0.51    2.81
  15  10  -2    3.71    3.00
  15 -10   2    1.26    4.48
  16 -10  -2    4.85    4.50
  16  10   2   -2.30    3.17
  16 -10   2   -6.33    4.17
  16  10  -2   -1.58    2.91
  17 -10  -2    5.94    5.38
  17 -10   2   -2.54    5.16
  17  10  -2    5.83    3.88
   0 -10  -3   59.70    4.16
   0 -10   3   43.73    4.43
   1 -10  -3   21.51    2.64
  -1 -10   3   14.74    2.55
  -1 -10  -3   19.73    1.98
   1 -10   3   16.83    2.65
   2 -10  -3   28.26    3.24
  -2 -10   3   30.14    3.21
   3 -10  -3  349.88   22.51
  -3 -10   3  350.92   22.38
   3  10  -3  361.58   22.32
  -4 -10   3   21.02    2.85
   4 -10  -3   25.60    3.65
   4 -10   3   19.08    3.70
   4  10  -3   20.04    2.49
  -5 -10   3    6.05    1.83
   5 -10  -3   10.03    2.92
   5  10  -3    9.48    2.02
   5 -10   3    6.91    2.86
   6 -10  -3  248.70   16.43
  -6 -10   3  237.07   15.54
   6  10  -3  216.58   15.54
   6 -10   3  272.84   19.52
   7 -10  -3  661.76   41.55
  -7 -10   3  638.38   40.42
   7  10  -3  645.01   40.69
   7 -10   3  683.98   41.72
   8 -10  -3   24.45    4.65
   8  10  -3   12.65    2.86
   8 -10   3   15.40    4.07
   9  10   3   92.52    6.44
   9 -10  -3   96.23    8.77
   9 -10   3  100.17    8.84
   9  10  -3   88.46    7.53
  10 -10  -3   45.08    6.53
  10  10   3   36.79    4.48
  10 -10   3   50.70    6.73
  10  10  -3   51.09    5.04
  11 -10  -3   37.80    5.83
  11  10   3   20.98    2.93
[truncated: 177,479 more chars]
