# Supplementary material for: New Aspects of the Synthesis of closo-Dodecaborate Nitrilium Derivatives [B12H11NCR]− (R = n-C3H7, i-C3H7, 4-C6H4CH3, 1-C10H7): Experimental and Theoretical Studies
Source: MDPI journal article supplement (doi:10.3390/inorganics10110196), 2022-11-02
Supplement: s1 [file s1 › 2.cif]

data_22kub41_0m_a
_audit_creation_date               2022-09-13
_audit_creation_method
;
Olex2 1.5
(compiled 2022.04.07 svn.rca3783a0 for OlexSys, GUI svn.r6498)
;
_shelx_SHELXL_version_number       '2018/3'
_audit_contact_author_address      ?
_audit_contact_author_email        ?
_audit_contact_author_name         ''
_audit_contact_author_phone        ?
_publ_contact_author_id_orcid      ?
_publ_section_references
;
Dolomanov, O.V., Bourhis, L.J., Gildea, R.J, Howard, J.A.K. & Puschmann, H.
 (2009), J. Appl. Cryst. 42, 339-341.

Sheldrick, G.M. (2015). Acta Cryst. C71, 3-8.
;
_chemical_name_common              ?
_chemical_name_systematic          ?
_chemical_formula_moiety           'C24 H20 P, C4 H18 B12 N'
_chemical_formula_sum              'C28 H38 B12 N P'
_chemical_formula_weight           549.28
_chemical_melting_point            ?
loop_
  _atom_type_symbol
  _atom_type_description
  _atom_type_scat_dispersion_real
  _atom_type_scat_dispersion_imag
  _atom_type_scat_source
 'C' 'C' 0.0033 0.0016 'International Tables Vol C Tables 4.2.6.8 and 6.1.1.4'
 'H' 'H' 0.0000 0.0000 'International Tables Vol C Tables 4.2.6.8 and 6.1.1.4'
 'B' 'B' 0.0013 0.0007 'International Tables Vol C Tables 4.2.6.8 and 6.1.1.4'
 'N' 'N' 0.0061 0.0033 'International Tables Vol C Tables 4.2.6.8 and 6.1.1.4'
 'P' 'P' 0.1023 0.0942 'International Tables Vol C Tables 4.2.6.8 and 6.1.1.4'

_shelx_space_group_comment
;
The symmetry employed for this shelxl refinement is uniquely defined
by the following loop, which should always be used as a source of
symmetry information in preference to the above space-group names.
They are only intended as comments.
;
_space_group_crystal_system        'triclinic'
_space_group_IT_number             2
_space_group_name_H-M_alt          'P -1'
_space_group_name_Hall             '-P 1'
loop_
  _space_group_symop_operation_xyz
 'x, y, z'
 '-x, -y, -z'

_cell_length_a                     10.076(2)
_cell_length_b                     11.413(3)
_cell_length_c                     15.720(4)
_cell_angle_alpha                  103.483(12)
_cell_angle_beta                   95.907(10)
_cell_angle_gamma                  113.512(9)
_cell_volume                       1572.6(7)
_cell_formula_units_Z              2
_cell_measurement_reflns_used      9991
_cell_measurement_temperature      100
_cell_measurement_theta_max        30.083
_cell_measurement_theta_min        2.264
_shelx_estimated_absorpt_T_max     0.989
_shelx_estimated_absorpt_T_min     0.918
_exptl_absorpt_coefficient_mu      0.109
_exptl_absorpt_correction_T_max    0.7460
_exptl_absorpt_correction_T_min    0.6782
_exptl_absorpt_correction_type     multi-scan
_exptl_absorpt_process_details
;
SADABS-2016/2 (Bruker,2016/2) was used for absorption correction.
wR2(int) was 0.0644 before and 0.0420 after correction.
The Ratio of minimum to maximum transmission is 0.9091.
The \l/2 correction factor is Not present.
;
_exptl_absorpt_special_details     ?
_exptl_crystal_colour              colourless
_exptl_crystal_colour_primary      colourless
_exptl_crystal_density_diffrn      1.160
_exptl_crystal_density_meas        ?
_exptl_crystal_density_method      ?
_exptl_crystal_description         block
_exptl_crystal_F_000               576
_exptl_crystal_size_max            0.8
_exptl_crystal_size_mid            0.6
_exptl_crystal_size_min            0.1
_exptl_transmission_factor_max     ?
_exptl_transmission_factor_min     ?
_diffrn_reflns_av_R_equivalents    0.0279
_diffrn_reflns_av_unetI/netI       0.0393
_diffrn_reflns_Laue_measured_fraction_full  0.993
_diffrn_reflns_Laue_measured_fraction_max  0.898
_diffrn_reflns_limit_h_max         13
_diffrn_reflns_limit_h_min         -14
_diffrn_reflns_limit_k_max         15
_diffrn_reflns_limit_k_min         -15
_diffrn_reflns_limit_l_max         22
_diffrn_reflns_limit_l_min         -20
_diffrn_reflns_number              20048
_diffrn_reflns_point_group_measured_fraction_full  0.993
_diffrn_reflns_point_group_measured_fraction_max  0.898
_diffrn_reflns_theta_full          25.242
_diffrn_reflns_theta_max           30.046
_diffrn_reflns_theta_min           2.040
_diffrn_ambient_temperature        100
_diffrn_detector_area_resol_mean   ?
_diffrn_measured_fraction_theta_full  0.993
_diffrn_measured_fraction_theta_max  0.898
_diffrn_measurement_device_type    'Bruker D8 Venture'
_diffrn_measurement_method         ?
_diffrn_radiation_type             MoK\a
_diffrn_radiation_wavelength       0.71073
_diffrn_source                     ?
_diffrn_source_current             30.0
_diffrn_source_power               1.5
_diffrn_source_voltage             50.0
_reflns_Friedel_coverage           0.000
_reflns_Friedel_fraction_full      .
_reflns_Friedel_fraction_max       .
_reflns_number_gt                  7016
_reflns_number_total               8269
_reflns_special_details
;
 Reflections were merged by SHELXL according to the crystal
 class for the calculation of statistics and refinement.
 
 _reflns_Friedel_fraction is defined as the number of unique
 Friedel pairs measured divided by the number that would be
 possible theoretically, ignoring centric projections and
 systematic absences.
;
_reflns_threshold_expression       'I > 2\s(I)'
_computing_cell_refinement         'SAINT v8.37A (Bruker, 2015)'
_computing_data_collection         ?
_computing_data_reduction          'SAINT v8.37A (Bruker, 2015)'
_computing_molecular_graphics      'Olex2 1.5 (Dolomanov et al., 2009)'
_computing_publication_material    'Olex2 1.5 (Dolomanov et al., 2009)'
_computing_structure_refinement    'SHELXL 2018/3 (Sheldrick, 2015)'
_computing_structure_solution      'SHELXT 2014/5 (Sheldrick, 2014)'
_refine_diff_density_max           0.455
_refine_diff_density_min           -0.355
_refine_diff_density_rms           0.061
_refine_ls_extinction_coef         .
_refine_ls_extinction_method       none
_refine_ls_goodness_of_fit_ref     1.061
_refine_ls_hydrogen_treatment      constr
_refine_ls_matrix_type             full
_refine_ls_number_parameters       380
_refine_ls_number_reflns           8269
_refine_ls_number_restraints       0
_refine_ls_R_factor_all            0.0585
_refine_ls_R_factor_gt             0.0488
_refine_ls_restrained_S_all        1.061
_refine_ls_shift/su_max            0.001
_refine_ls_shift/su_mean           0.000
_refine_ls_structure_factor_coef   Fsqd
_refine_ls_weighting_details      
 'w=1/[\s^2^(Fo^2^)+(0.0530P)^2^+1.2623P] where P=(Fo^2^+2Fc^2^)/3'
_refine_ls_weighting_scheme        calc
_refine_ls_wR_factor_gt            0.1279
_refine_ls_wR_factor_ref           0.1336
_refine_special_details            ?
_olex2_refinement_description
;
1.a Secondary CH2 refined with riding coordinates:
 C2(H2A,H2B), C3(H3A,H3B)
1.b Aromatic/amide H refined with riding coordinates:
 C6(H6), C7(H7), C8(H8), C9(H9), C10(H10), C12(H12), C13(H13), C14(H14),
 C15(H15), C16(H16), C18(H18), C19(H19), C20(H20), C21(H21), C22(H22), C24(H24),
  C25(H25), C26(H26), C27(H27), C28(H28)
1.c Idealised Me refined as rotating group:
 C4(H4A,H4B,H4C)
1.d Boron cage BH refined with riding coordinates:
 B2(H2), B3(H3), B4(H4), B5(H5), B6(H6A), B7(H7A), B8(H8A), B9(H9A), B10(H10A),
  B11(H11), B12(H12A)
;
_atom_sites_solution_hydrogens     geom
_atom_sites_solution_primary       ?
_atom_sites_solution_secondary     ?
loop_
  _atom_site_label
  _atom_site_type_symbol
  _atom_site_fract_x
  _atom_site_fract_y
  _atom_site_fract_z
  _atom_site_U_iso_or_equiv
  _atom_site_adp_type
  _atom_site_occupancy
  _atom_site_site_symmetry_order
  _atom_site_calc_flag
  _atom_site_refinement_flags_posn
  _atom_site_refinement_flags_adp
  _atom_site_refinement_flags_occupancy
  _atom_site_disorder_assembly
  _atom_site_disorder_group
 P1 P 0.79485(4) 0.53757(4) 0.62612(2) 0.01323(10) Uani 1 1 d . . . . .
 C5 C 0.94057(17) 0.52778(16) 0.69662(10) 0.0157(3) Uani 1 1 d . . . . .
 C6 C 0.90318(18) 0.41561(17) 0.72786(11) 0.0191(3) Uani 1 1 d . . . . .
 H6 H 0.807089 0.342780 0.706099 0.023 Uiso 1 1 calc R U . . .
 C7 C 1.0079(2) 0.41165(18) 0.79105(11) 0.0229(3) Uani 1 1 d . . . . .
 H7 H 0.983499 0.335182 0.811566 0.027 Uiso 1 1 calc R U . . .
 C8 C 1.1480(2) 0.51916(19) 0.82421(11) 0.0239(3) Uani 1 1 d . . . . .
 H8 H 1.218458 0.516478 0.867830 0.029 Uiso 1 1 calc R U . . .
 C9 C 1.18458(19) 0.63034(18) 0.79349(12) 0.0241(3) Uani 1 1 d . . . . .
 H9 H 1.280252 0.703551 0.816293 0.029 Uiso 1 1 calc R U . . .
 C10 C 1.08192(18) 0.63543(16) 0.72936(11) 0.0199(3) Uani 1 1 d . . . . .
 H10 H 1.107779 0.711322 0.708110 0.024 Uiso 1 1 calc R U . . .
 C11 C 0.85430(17) 0.62708(15) 0.54582(10) 0.0149(3) Uani 1 1 d . . . . .
 C12 C 0.78679(18) 0.56258(16) 0.45427(10) 0.0180(3) Uani 1 1 d . . . . .
 H12 H 0.717805 0.470638 0.434960 0.022 Uiso 1 1 calc R U . . .
 C13 C 0.82050(19) 0.63263(17) 0.39198(11) 0.0211(3) Uani 1 1 d . . . . .
 H13 H 0.773797 0.588655 0.330369 0.025 Uiso 1 1 calc R U . . .
 C14 C 0.92211(19) 0.76657(18) 0.41946(11) 0.0215(3) Uani 1 1 d . . . . .
 H14 H 0.945397 0.814147 0.376712 0.026 Uiso 1 1 calc R U . . .
 C15 C 0.99009(19) 0.83130(17) 0.51008(11) 0.0215(3) Uani 1 1 d . . . . .
 H15 H 1.060193 0.922851 0.528578 0.026 Uiso 1 1 calc R U . . .
 C16 C 0.95638(18) 0.76330(16) 0.57366(11) 0.0190(3) Uani 1 1 d . . . . .
 H16 H 1.001904 0.808459 0.635325 0.023 Uiso 1 1 calc R U . . .
 C17 C 0.71030(16) 0.62008(15) 0.69813(10) 0.0146(3) Uani 1 1 d . . . . .
 C18 C 0.68165(17) 0.58511(15) 0.77630(10) 0.0169(3) Uani 1 1 d . . . . .
 H18 H 0.704804 0.517550 0.789687 0.020 Uiso 1 1 calc R U . . .
 C19 C 0.61937(18) 0.64919(16) 0.83430(10) 0.0190(3) Uani 1 1 d . . . . .
 H19 H 0.599226 0.625047 0.887097 0.023 Uiso 1 1 calc R U . . .
 C20 C 0.58655(18) 0.74904(17) 0.81473(11) 0.0205(3) Uani 1 1 d . . . . .
 H20 H 0.546677 0.794705 0.855182 0.025 Uiso 1 1 calc R U . . .
 C21 C 0.6120(2) 0.7820(2) 0.73629(12) 0.0280(4) Uani 1 1 d . . . . .
 H21 H 0.587287 0.848689 0.722736 0.034 Uiso 1 1 calc R U . . .
 C22 C 0.6734(2) 0.71771(19) 0.67740(11) 0.0240(4) Uani 1 1 d . . . . .
 H22 H 0.690121 0.739946 0.623633 0.029 Uiso 1 1 calc R U . . .
 C23 C 0.66375(17) 0.36923(15) 0.56449(10) 0.0156(3) Uani 1 1 d . . . . .
 C24 C 0.51409(18) 0.32257(16) 0.56738(10) 0.0178(3) Uani 1 1 d . . . . .
 H24 H 0.480207 0.378789 0.603987 0.021 Uiso 1 1 calc R U . . .
 C25 C 0.41444(19) 0.19239(17) 0.51596(11) 0.0226(3) Uani 1 1 d . . . . .
 H25 H 0.312657 0.159193 0.518519 0.027 Uiso 1 1 calc R U . . .
 C26 C 0.4638(2) 0.11138(17) 0.46110(11) 0.0236(3) Uani 1 1 d . . . . .
 H26 H 0.394882 0.024020 0.424808 0.028 Uiso 1 1 calc R U . . .
 C27 C 0.6136(2) 0.15725(17) 0.45889(11) 0.0233(3) Uani 1 1 d . . . . .
 H27 H 0.646770 0.100744 0.421879 0.028 Uiso 1 1 calc R U . . .
 C28 C 0.71450(19) 0.28568(16) 0.51086(11) 0.0198(3) Uani 1 1 d . . . . .
 H28 H 0.816927 0.316906 0.510224 0.024 Uiso 1 1 calc R U . . .
 N1 N 0.66205(15) 1.10572(14) 0.88532(9) 0.0190(3) Uani 1 1 d . . . . .
 C1 C 0.76563(18) 1.09657(16) 0.91141(11) 0.0206(3) Uani 1 1 d . . . . .
 C2 C 0.89853(18) 1.09060(17) 0.95158(12) 0.0219(3) Uani 1 1 d . . . . .
 H2A H 0.963256 1.092139 0.908143 0.026 Uiso 1 1 calc R U . . .
 H2B H 0.870954 1.006220 0.967475 0.026 Uiso 1 1 calc R U . . .
 C3 C 0.98236(18) 1.21149(17) 1.03647(11) 0.0214(3) Uani 1 1 d . . . . .
 H3A H 0.914290 1.212792 1.077442 0.026 Uiso 1 1 calc R U . . .
 H3B H 1.065381 1.200963 1.067815 0.026 Uiso 1 1 calc R U . . .
 C4 C 1.0433(2) 1.34392(18) 1.01539(12) 0.0264(4) Uani 1 1 d . . . . .
 H4A H 1.112775 1.344134 0.976097 0.040 Uiso 1 1 calc R U . . .
 H4B H 1.095001 1.417493 1.071245 0.040 Uiso 1 1 calc R U . . .
 H4C H 0.961365 1.355603 0.985239 0.040 Uiso 1 1 calc R U . . .
 B1 B 0.52513(18) 1.12559(17) 0.85991(12) 0.0155(3) Uani 1 1 d . . . . .
 B2 B 0.36696(19) 0.99881(17) 0.77922(11) 0.0160(3) Uani 1 1 d . . . . .
 H2 H 0.360006 0.899329 0.742024 0.019 Uiso 1 1 calc R U . . .
 B3 B 0.36323(18) 1.04084(17) 0.89639(11) 0.0153(3) Uani 1 1 d . . . . .
 H3 H 0.353986 0.968728 0.935643 0.018 Uiso 1 1 calc R U . . .
 B4 B 0.47436(19) 1.21895(17) 0.94559(11) 0.0158(3) Uani 1 1 d . . . . .
 H4 H 0.537664 1.263189 1.017043 0.019 Uiso 1 1 calc R U . . .
 B5 B 0.54683(19) 1.28641(17) 0.85898(12) 0.0169(3) Uani 1 1 d . . . . .
 H5 H 0.657631 1.374586 0.873750 0.020 Uiso 1 1 calc R U . . .
 B6 B 0.48093(19) 1.15087(18) 0.75601(12) 0.0172(3) Uani 1 1 d . . . . .
 H6A H 0.548403 1.150653 0.703678 0.021 Uiso 1 1 calc R U . . .
 B7 B 0.21103(19) 1.01631(17) 0.81415(12) 0.0160(3) Uani 1 1 d . . . . .
 H7A H 0.100375 0.927984 0.799466 0.019 Uiso 1 1 calc R U . . .
 B8 B 0.27777(19) 1.15128(18) 0.91621(11) 0.0162(3) Uani 1 1 d . . . . .
 H8A H 0.210925 1.151478 0.968879 0.019 Uiso 1 1 calc R U . . .
 B9 B 0.3899(2) 1.30272(18) 0.89338(12) 0.0176(3) Uani 1 1 d . . . . .
 H9A H 0.396634 1.402145 0.930541 0.021 Uiso 1 1 calc R U . . .
 B10 B 0.3937(2) 1.26065(18) 0.77717(12) 0.0176(3) Uani 1 1 d . . . . .
 H10A H 0.403108 1.332988 0.738071 0.021 Uiso 1 1 calc R U . . .
 B11 B 0.28397(19) 1.08410(18) 0.72786(11) 0.0168(3) Uani 1 1 d . . . . .
 H11 H 0.221465 1.040256 0.656247 0.020 Uiso 1 1 calc R U . . .
 B12 B 0.22732(19) 1.17705(18) 0.81231(12) 0.0176(3) Uani 1 1 d . . . . .
 H12A H 0.126774 1.193998 0.796201 0.021 Uiso 1 1 calc R U . . .

loop_
  _atom_site_aniso_label
  _atom_site_aniso_U_11
  _atom_site_aniso_U_22
  _atom_site_aniso_U_33
  _atom_site_aniso_U_23
  _atom_site_aniso_U_13
  _atom_site_aniso_U_12
 P1 0.01621(18) 0.01536(18) 0.01164(17) 0.00450(13) 0.00470(14) 0.00971(14)
 C5 0.0190(7) 0.0194(7) 0.0141(7) 0.0051(6) 0.0053(6) 0.0130(6)
 C6 0.0211(7) 0.0221(8) 0.0192(7) 0.0085(6) 0.0071(6) 0.0125(6)
 C7 0.0301(9) 0.0288(9) 0.0215(8) 0.0131(7) 0.0090(7) 0.0205(7)
 C8 0.0268(8) 0.0335(9) 0.0186(8) 0.0075(7) 0.0032(7) 0.0210(7)
 C9 0.0204(8) 0.0258(8) 0.0251(8) 0.0036(7) 0.0000(7) 0.0126(7)
 C10 0.0212(7) 0.0185(7) 0.0233(8) 0.0067(6) 0.0043(6) 0.0117(6)
 C11 0.0184(7) 0.0187(7) 0.0136(7) 0.0075(6) 0.0059(6) 0.0119(6)
 C12 0.0217(7) 0.0203(7) 0.0146(7) 0.0043(6) 0.0054(6) 0.0117(6)
 C13 0.0284(8) 0.0287(8) 0.0129(7) 0.0065(6) 0.0064(6) 0.0185(7)
 C14 0.0264(8) 0.0285(8) 0.0196(8) 0.0135(7) 0.0099(7) 0.0172(7)
 C15 0.0232(8) 0.0217(8) 0.0219(8) 0.0098(6) 0.0046(7) 0.0103(6)
 C16 0.0224(8) 0.0209(7) 0.0150(7) 0.0061(6) 0.0028(6) 0.0107(6)
 C17 0.0166(7) 0.0171(7) 0.0123(6) 0.0032(5) 0.0042(5) 0.0098(6)
 C18 0.0194(7) 0.0164(7) 0.0170(7) 0.0066(6) 0.0051(6) 0.0087(6)
 C19 0.0218(7) 0.0223(8) 0.0136(7) 0.0056(6) 0.0069(6) 0.0094(6)
 C20 0.0221(8) 0.0237(8) 0.0190(7) 0.0042(6) 0.0089(6) 0.0134(6)
 C21 0.0399(10) 0.0349(10) 0.0284(9) 0.0154(8) 0.0159(8) 0.0299(9)
 C22 0.0364(9) 0.0346(9) 0.0195(8) 0.0152(7) 0.0142(7) 0.0277(8)
 C23 0.0195(7) 0.0159(7) 0.0124(6) 0.0040(5) 0.0038(6) 0.0089(6)
 C24 0.0205(7) 0.0222(7) 0.0136(7) 0.0067(6) 0.0046(6) 0.0112(6)
 C25 0.0209(8) 0.0237(8) 0.0215(8) 0.0106(6) 0.0013(6) 0.0068(6)
 C26 0.0313(9) 0.0178(7) 0.0180(7) 0.0066(6) -0.0010(7) 0.0080(7)
 C27 0.0362(9) 0.0197(8) 0.0177(7) 0.0053(6) 0.0063(7) 0.0159(7)
 C28 0.0247(8) 0.0204(7) 0.0188(7) 0.0067(6) 0.0085(6) 0.0128(6)
 N1 0.0177(6) 0.0203(6) 0.0201(6) 0.0058(5) 0.0052(5) 0.0093(5)
 C1 0.0187(7) 0.0193(7) 0.0244(8) 0.0064(6) 0.0054(6) 0.0087(6)
 C2 0.0170(7) 0.0219(8) 0.0298(9) 0.0086(7) 0.0048(7) 0.0111(6)
 C3 0.0203(8) 0.0280(8) 0.0199(8) 0.0085(6) 0.0067(6) 0.0134(7)
 C4 0.0269(9) 0.0224(8) 0.0266(9) 0.0042(7) 0.0019(7) 0.0103(7)
 B1 0.0143(7) 0.0173(8) 0.0164(8) 0.0060(6) 0.0032(6) 0.0078(6)
 B2 0.0167(8) 0.0163(8) 0.0150(8) 0.0034(6) 0.0043(6) 0.0077(6)
 B3 0.0150(7) 0.0166(7) 0.0158(8) 0.0068(6) 0.0036(6) 0.0072(6)
 B4 0.0165(8) 0.0178(8) 0.0131(7) 0.0040(6) 0.0033(6) 0.0079(6)
 B5 0.0166(8) 0.0168(8) 0.0160(8) 0.0057(6) 0.0027(6) 0.0059(6)
 B6 0.0179(8) 0.0188(8) 0.0154(8) 0.0058(6) 0.0048(6) 0.0079(6)
 B7 0.0140(7) 0.0173(8) 0.0165(8) 0.0052(6) 0.0039(6) 0.0064(6)
 B8 0.0161(8) 0.0196(8) 0.0148(7) 0.0048(6) 0.0049(6) 0.0095(6)
 B9 0.0203(8) 0.0163(8) 0.0171(8) 0.0036(6) 0.0037(7) 0.0097(6)
 B10 0.0202(8) 0.0172(8) 0.0168(8) 0.0072(6) 0.0036(7) 0.0085(6)
 B11 0.0182(8) 0.0187(8) 0.0132(7) 0.0047(6) 0.0021(6) 0.0082(6)
 B12 0.0175(8) 0.0198(8) 0.0174(8) 0.0061(6) 0.0020(7) 0.0101(7)

_geom_special_details
;
 All esds (except the esd in the dihedral angle between two l.s. planes)
 are estimated using the full covariance matrix.  The cell esds are taken
 into account individually in the estimation of esds in distances, angles
 and torsion angles; correlations between esds in cell parameters are only
 used when they are defined by crystal symmetry.  An approximate (isotropic)
 treatment of cell esds is used for estimating esds involving l.s. planes.
;
loop_
  _geom_bond_atom_site_label_1
  _geom_bond_atom_site_label_2
  _geom_bond_distance
  _geom_bond_site_symmetry_2
  _geom_bond_publ_flag
 P1 C5 1.8028(16) . ?
 P1 C11 1.8067(16) . ?
 P1 C17 1.7988(15) . ?
 P1 C23 1.7941(16) . ?
 C5 C6 1.403(2) . ?
 C5 C10 1.400(2) . ?
 C6 H6 0.9500 . ?
 C6 C7 1.395(2) . ?
 C7 H7 0.9500 . ?
 C7 C8 1.392(3) . ?
 C8 H8 0.9500 . ?
 C8 C9 1.389(3) . ?
 C9 H9 0.9500 . ?
 C9 C10 1.397(2) . ?
 C10 H10 0.9500 . ?
 C11 C12 1.407(2) . ?
 C11 C16 1.407(2) . ?
 C12 H12 0.9500 . ?
 C12 C13 1.389(2) . ?
 C13 H13 0.9500 . ?
 C13 C14 1.387(3) . ?
 C14 H14 0.9500 . ?
 C14 C15 1.396(2) . ?
 C15 H15 0.9500 . ?
 C15 C16 1.392(2) . ?
 C16 H16 0.9500 . ?
 C17 C18 1.401(2) . ?
 C17 C22 1.400(2) . ?
 C18 H18 0.9500 . ?
 C18 C19 1.390(2) . ?
 C19 H19 0.9500 . ?
 C19 C20 1.395(2) . ?
 C20 H20 0.9500 . ?
 C20 C21 1.390(2) . ?
 C21 H21 0.9500 . ?
 C21 C22 1.394(2) . ?
 C22 H22 0.9500 . ?
 C23 C24 1.394(2) . ?
 C23 C28 1.409(2) . ?
 C24 H24 0.9500 . ?
 C24 C25 1.397(2) . ?
 C25 H25 0.9500 . ?
 C25 C26 1.389(3) . ?
 C26 H26 0.9500 . ?
 C26 C27 1.394(3) . ?
 C27 H27 0.9500 . ?
 C27 C28 1.390(2) . ?
 C28 H28 0.9500 . ?
 N1 C1 1.135(2) . ?
 N1 B1 1.514(2) . ?
 C1 C2 1.454(2) . ?
 C2 H2A 0.9900 . ?
 C2 H2B 0.9900 . ?
 C2 C3 1.542(2) . ?
 C3 H3A 0.9900 . ?
 C3 H3B 0.9900 . ?
 C3 C4 1.519(2) . ?
 C4 H4A 0.9800 . ?
 C4 H4B 0.9800 . ?
 C4 H4C 0.9800 . ?
 B1 B2 1.769(2) . ?
 B1 B3 1.766(2) . ?
 B1 B4 1.766(2) . ?
 B1 B5 1.763(2) . ?
 B1 B6 1.767(2) . ?
 B2 H2 1.1200 . ?
 B2 B3 1.800(2) . ?
 B2 B6 1.804(3) . ?
 B2 B7 1.785(2) . ?
 B2 B11 1.782(2) . ?
 B3 H3 1.1200 . ?
 B3 B4 1.805(2) . ?
 B3 B7 1.784(2) . ?
 B3 B8 1.779(2) . ?
 B4 H4 1.1200 . ?
 B4 B5 1.796(2) . ?
 B4 B8 1.777(2) . ?
 B4 B9 1.784(2) . ?
 B5 H5 1.1200 . ?
 B5 B6 1.802(3) . ?
 B5 B9 1.787(3) . ?
 B5 B10 1.782(2) . ?
 B6 H6A 1.1200 . ?
 B6 B10 1.788(3) . ?
 B6 B11 1.781(3) . ?
 B7 H7A 1.1200 . ?
 B7 B8 1.788(3) . ?
 B7 B11 1.794(3) . ?
 B7 B12 1.783(3) . ?
 B8 H8A 1.1200 . ?
 B8 B9 1.791(3) . ?
 B8 B12 1.785(2) . ?
 B9 H9A 1.1200 . ?
 B9 B10 1.786(3) . ?
 B9 B12 1.791(3) . ?
 B10 H10A 1.1200 . ?
 B10 B11 1.789(3) . ?
 B10 B12 1.785(3) . ?
 B11 H11 1.1200 . ?
 B11 B12 1.788(3) . ?
 B12 H12A 1.1200 . ?

loop_
  _geom_angle_atom_site_label_1
  _geom_angle_atom_site_label_2
  _geom_angle_atom_site_label_3
  _geom_angle
  _geom_angle_site_symmetry_1
  _geom_angle_site_symmetry_3
  _geom_angle_publ_flag
 C5 P1 C11 115.06(7) . . ?
 C17 P1 C5 107.57(7) . . ?
 C17 P1 C11 108.44(7) . . ?
 C23 P1 C5 107.34(7) . . ?
 C23 P1 C11 107.60(7) . . ?
 C23 P1 C17 110.85(7) . . ?
 C6 C5 P1 117.80(12) . . ?
 C10 C5 P1 121.63(12) . . ?
 C10 C5 C6 120.05(14) . . ?
 C5 C6 H6 120.2 . . ?
 C7 C6 C5 119.62(15) . . ?
 C7 C6 H6 120.2 . . ?
 C6 C7 H7 119.8 . . ?
 C8 C7 C6 120.34(16) . . ?
 C8 C7 H7 119.8 . . ?
 C7 C8 H8 120.0 . . ?
 C9 C8 C7 119.95(15) . . ?
 C9 C8 H8 120.0 . . ?
 C8 C9 H9 119.7 . . ?
 C8 C9 C10 120.55(16) . . ?
 C10 C9 H9 119.7 . . ?
 C5 C10 H10 120.3 . . ?
 C9 C10 C5 119.48(15) . . ?
 C9 C10 H10 120.3 . . ?
 C12 C11 P1 119.10(12) . . ?
 C12 C11 C16 119.33(14) . . ?
 C16 C11 P1 121.30(12) . . ?
 C11 C12 H12 119.8 . . ?
 C13 C12 C11 120.36(15) . . ?
 C13 C12 H12 119.8 . . ?
 C12 C13 H13 119.9 . . ?
 C14 C13 C12 120.22(15) . . ?
 C14 C13 H13 119.9 . . ?
 C13 C14 H14 120.1 . . ?
 C13 C14 C15 119.85(15) . . ?
 C15 C14 H14 120.1 . . ?
 C14 C15 H15 119.6 . . ?
 C16 C15 C14 120.79(16) . . ?
 C16 C15 H15 119.6 . . ?
 C11 C16 H16 120.3 . . ?
 C15 C16 C11 119.44(15) . . ?
 C15 C16 H16 120.3 . . ?
 C18 C17 P1 118.72(11) . . ?
 C22 C17 P1 121.28(12) . . ?
 C22 C17 C18 120.00(14) . . ?
 C17 C18 H18 120.0 . . ?
 C19 C18 C17 120.07(14) . . ?
 C19 C18 H18 120.0 . . ?
 C18 C19 H19 120.1 . . ?
 C18 C19 C20 119.79(14) . . ?
 C20 C19 H19 120.1 . . ?
 C19 C20 H20 119.9 . . ?
 C21 C20 C19 120.27(15) . . ?
 C21 C20 H20 119.9 . . ?
 C20 C21 H21 119.8 . . ?
 C20 C21 C22 120.37(16) . . ?
 C22 C21 H21 119.8 . . ?
 C17 C22 H22 120.3 . . ?
 C21 C22 C17 119.47(15) . . ?
 C21 C22 H22 120.3 . . ?
 C24 C23 P1 121.06(12) . . ?
 C24 C23 C28 120.41(15) . . ?
 C28 C23 P1 118.51(12) . . ?
 C23 C24 H24 120.3 . . ?
 C23 C24 C25 119.40(15) . . ?
 C25 C24 H24 120.3 . . ?
 C24 C25 H25 119.9 . . ?
 C26 C25 C24 120.17(16) . . ?
 C26 C25 H25 119.9 . . ?
 C25 C26 H26 119.7 . . ?
 C25 C26 C27 120.52(16) . . ?
 C27 C26 H26 119.7 . . ?
 C26 C27 H27 120.0 . . ?
 C28 C27 C26 119.94(16) . . ?
 C28 C27 H27 120.0 . . ?
 C23 C28 H28 120.2 . . ?
 C27 C28 C23 119.51(15) . . ?
 C27 C28 H28 120.2 . . ?
 C1 N1 B1 174.35(16) . . ?
 N1 C1 C2 175.65(18) . . ?
 C1 C2 H2A 109.8 . . ?
 C1 C2 H2B 109.8 . . ?
 C1 C2 C3 109.40(14) . . ?
 H2A C2 H2B 108.2 . . ?
 C3 C2 H2A 109.8 . . ?
 C3 C2 H2B 109.8 . . ?
 C2 C3 H3A 109.1 . . ?
 C2 C3 H3B 109.1 . . ?
 H3A C3 H3B 107.8 . . ?
 C4 C3 C2 112.49(14) . . ?
 C4 C3 H3A 109.1 . . ?
 C4 C3 H3B 109.1 . . ?
 C3 C4 H4A 109.5 . . ?
 C3 C4 H4B 109.5 . . ?
 C3 C4 H4C 109.5 . . ?
 H4A C4 H4B 109.5 . . ?
 H4A C4 H4C 109.5 . . ?
 H4B C4 H4C 109.5 . . ?
 N1 B1 B2 121.80(13) . . ?
 N1 B1 B3 119.37(13) . . ?
 N1 B1 B4 117.64(13) . . ?
 N1 B1 B5 118.88(13) . . ?
 N1 B1 B6 121.41(13) . . ?
 B3 B1 B2 61.23(10) . . ?
 B3 B1 B4 61.46(10) . . ?
 B3 B1 B6 111.20(12) . . ?
 B4 B1 B2 111.18(12) . . ?
 B4 B1 B6 111.14(12) . . ?
 B5 B1 B2 111.20(12) . . ?
 B5 B1 B3 111.19(12) . . ?
 B5 B1 B4 61.17(10) . . ?
 B5 B1 B6 61.37(10) . . ?
 B6 B1 B2 61.35(10) . . ?
 B1 B2 H2 123.6 . . ?
 B1 B2 B3 59.29(10) . . ?
 B1 B2 B6 59.25(10) . . ?
 B1 B2 B7 105.94(12) . . ?
 B1 B2 B11 105.80(12) . . ?
 B3 B2 H2 121.7 . . ?
 B3 B2 B6 107.93(12) . . ?
 B6 B2 H2 121.7 . . ?
 B7 B2 H2 122.1 . . ?
 B7 B2 B3 59.67(9) . . ?
 B7 B2 B6 107.92(12) . . ?
 B11 B2 H2 122.2 . . ?
 B11 B2 B3 107.90(12) . . ?
 B11 B2 B6 59.54(10) . . ?
 B11 B2 B7 60.40(10) . . ?
 B1 B3 B2 59.49(10) . . ?
 B1 B3 H3 123.4 . . ?
 B1 B3 B4 59.28(10) . . ?
 B1 B3 B7 106.16(12) . . ?
 B1 B3 B8 105.83(12) . . ?
 B2 B3 H3 121.6 . . ?
 B2 B3 B4 108.02(12) . . ?
 B4 B3 H3 121.8 . . ?
 B7 B3 B2 59.75(10) . . ?
 B7 B3 H3 122.1 . . ?
 B7 B3 B4 107.79(12) . . ?
 B8 B3 B2 107.87(12) . . ?
 B8 B3 H3 122.3 . . ?
 B8 B3 B4 59.45(10) . . ?
 B8 B3 B7 60.25(10) . . ?
 B1 B4 B3 59.26(10) . . ?
 B1 B4 H4 123.4 . . ?
 B1 B4 B5 59.35(10) . . ?
 B1 B4 B8 105.91(12) . . ?
 B1 B4 B9 106.30(12) . . ?
 B3 B4 H4 121.7 . . ?
 B5 B4 B3 107.95(12) . . ?
 B5 B4 H4 121.6 . . ?
 B8 B4 B3 59.56(10) . . ?
 B8 B4 H4 122.2 . . ?
 B8 B4 B5 107.96(12) . . ?
 B8 B4 B9 60.37(10) . . ?
 B9 B4 B3 108.04(12) . . ?
 B9 B4 H4 121.9 . . ?
 B9 B4 B5 59.88(10) . . ?
 B1 B5 B4 59.49(10) . . ?
 B1 B5 H5 123.3 . . ?
 B1 B5 B6 59.41(10) . . ?
 B1 B5 B9 106.30(12) . . ?
 B1 B5 B10 106.14(12) . . ?
 B4 B5 H5 121.6 . . ?
 B4 B5 B6 108.21(12) . . ?
 B6 B5 H5 121.5 . . ?
 B9 B5 B4 59.75(10) . . ?
 B9 B5 H5 122.1 . . ?
 B9 B5 B6 108.12(12) . . ?
 B10 B5 B4 107.75(12) . . ?
 B10 B5 H5 122.2 . . ?
 B10 B5 B6 59.87(10) . . ?
 B10 B5 B9 60.06(10) . . ?
 B1 B6 B2 59.39(10) . . ?
 B1 B6 B5 59.22(10) . . ?
 B1 B6 H6A 123.5 . . ?
 B1 B6 B10 105.71(12) . . ?
 B1 B6 B11 105.96(12) . . ?
 B2 B6 H6A 121.7 . . ?
 B5 B6 B2 107.89(12) . . ?
 B5 B6 H6A 121.8 . . ?
 B10 B6 B2 107.65(12) . . ?
 B10 B6 B5 59.51(10) . . ?
 B10 B6 H6A 122.4 . . ?
 B11 B6 B2 59.61(10) . . ?
 B11 B6 B5 107.75(12) . . ?
 B11 B6 H6A 122.2 . . ?
 B11 B6 B10 60.18(10) . . ?
 B2 B7 H7A 121.6 . . ?
 B2 B7 B8 108.13(12) . . ?
 B2 B7 B11 59.71(10) . . ?
 B3 B7 B2 60.58(10) . . ?
 B3 B7 H7A 121.6 . . ?
 B3 B7 B8 59.74(10) . . ?
 B3 B7 B11 108.09(12) . . ?
 B8 B7 H7A 121.9 . . ?
 B8 B7 B11 107.76(12) . . ?
 B11 B7 H7A 121.9 . . ?
 B12 B7 B2 107.97(12) . . ?
 B12 B7 B3 107.97(12) . . ?
 B12 B7 H7A 121.8 . . ?
 B12 B7 B8 59.97(10) . . ?
 B12 B7 B11 59.96(10) . . ?
 B3 B8 B7 60.00(10) . . ?
 B3 B8 H8A 121.2 . . ?
 B3 B8 B9 108.90(12) . . ?
 B3 B8 B12 108.10(12) . . ?
 B4 B8 B3 60.99(10) . . ?
 B4 B8 B7 108.81(12) . . ?
 B4 B8 H8A 121.2 . . ?
 B4 B8 B9 60.02(10) . . ?
 B4 B8 B12 108.20(12) . . ?
 B7 B8 H8A 121.5 . . ?
 B7 B8 B9 108.37(12) . . ?
 B9 B8 H8A 121.4 . . ?
 B12 B8 B7 59.87(10) . . ?
 B12 B8 H8A 121.9 . . ?
 B12 B8 B9 60.12(10) . . ?
 B4 B9 B5 60.37(10) . . ?
 B4 B9 B8 59.61(10) . . ?
 B4 B9 H9A 121.7 . . ?
 B4 B9 B10 108.06(12) . . ?
 B4 B9 B12 107.60(12) . . ?
 B5 B9 B8 107.75(12) . . ?
 B5 B9 H9A 121.7 . . ?
 B5 B9 B12 107.65(12) . . ?
 B8 B9 H9A 122.1 . . ?
 B8 B9 B12 59.77(10) . . ?
 B10 B9 B5 59.82(10) . . ?
 B10 B9 B8 107.63(12) . . ?
 B10 B9 H9A 121.8 . . ?
 B10 B9 B12 59.87(10) . . ?
 B12 B9 H9A 122.0 . . ?
 B5 B10 B6 60.62(10) . . ?
 B5 B10 B9 60.11(10) . . ?
 B5 B10 H10A 121.4 . . ?
 B5 B10 B11 108.25(12) . . ?
 B5 B10 B12 108.14(12) . . ?
 B6 B10 H10A 121.5 . . ?
 B6 B10 B11 59.70(10) . . ?
 B9 B10 B6 108.75(12) . . ?
 B9 B10 H10A 121.3 . . ?
 B9 B10 B11 108.42(12) . . ?
 B11 B10 H10A 121.7 . . ?
 B12 B10 B6 107.98(12) . . ?
 B12 B10 B9 60.20(10) . . ?
 B12 B10 H10A 121.8 . . ?
 B12 B10 B11 60.02(10) . . ?
 B2 B11 B7 59.89(10) . . ?
 B2 B11 B10 108.58(12) . . ?
 B2 B11 H11 121.3 . . ?
 B2 B11 B12 107.90(12) . . ?
 B6 B11 B2 60.85(10) . . ?
 B6 B11 B7 108.56(12) . . ?
 B6 B11 B10 60.12(10) . . ?
 B6 B11 H11 121.1 . . ?
 B6 B11 B12 108.19(12) . . ?
 B7 B11 H11 121.8 . . ?
 B10 B11 B7 107.80(12) . . ?
 B10 B11 H11 121.7 . . ?
 B12 B11 B7 59.70(10) . . ?
 B12 B11 B10 59.87(10) . . ?
 B12 B11 H11 122.0 . . ?
 B7 B12 B8 60.17(10) . . ?
 B7 B12 B9 108.60(12) . . ?
 B7 B12 B10 108.49(12) . . ?
 B7 B12 B11 60.33(10) . . ?
 B7 B12 H12A 121.2 . . ?
 B8 B12 B9 60.11(10) . . ?
 B8 B12 B10 107.95(12) . . ?
 B8 B12 B11 108.22(12) . . ?
 B8 B12 H12A 121.7 . . ?
 B9 B12 H12A 121.5 . . ?
 B10 B12 B9 59.93(10) . . ?
 B10 B12 B11 60.11(10) . . ?
 B10 B12 H12A 121.7 . . ?
 B11 B12 B9 108.28(12) . . ?
 B11 B12 H12A 121.5 . . ?

loop_
  _geom_torsion_atom_site_label_1
  _geom_torsion_atom_site_label_2
  _geom_torsion_atom_site_label_3
  _geom_torsion_atom_site_label_4
  _geom_torsion
  _geom_torsion_site_symmetry_1
  _geom_torsion_site_symmetry_2
  _geom_torsion_site_symmetry_3
  _geom_torsion_site_symmetry_4
  _geom_torsion_publ_flag
 P1 C5 C6 C7 -172.29(12) . . . . ?
 P1 C5 C10 C9 171.12(13) . . . . ?
 P1 C11 C12 C13 174.15(12) . . . . ?
 P1 C11 C16 C15 -174.82(12) . . . . ?
 P1 C17 C18 C19 178.60(12) . . . . ?
 P1 C17 C22 C21 -178.16(14) . . . . ?
 P1 C23 C24 C25 177.72(12) . . . . ?
 P1 C23 C28 C27 -176.65(12) . . . . ?
 C5 P1 C11 C12 124.59(12) . . . . ?
 C5 P1 C11 C16 -61.36(15) . . . . ?
 C5 P1 C17 C18 -42.68(14) . . . . ?
 C5 P1 C17 C22 137.22(14) . . . . ?
 C5 P1 C23 C24 124.66(13) . . . . ?
 C5 P1 C23 C28 -57.04(14) . . . . ?
 C5 C6 C7 C8 1.1(2) . . . . ?
 C6 C5 C10 C9 -0.3(2) . . . . ?
 C6 C7 C8 C9 -0.8(3) . . . . ?
 C7 C8 C9 C10 0.0(3) . . . . ?
 C8 C9 C10 C5 0.6(3) . . . . ?
 C10 C5 C6 C7 -0.5(2) . . . . ?
 C11 P1 C5 C6 -150.40(12) . . . . ?
 C11 P1 C5 C10 37.96(15) . . . . ?
 C11 P1 C17 C18 -167.70(12) . . . . ?
 C11 P1 C17 C22 12.20(16) . . . . ?
 C11 P1 C23 C24 -110.97(13) . . . . ?
 C11 P1 C23 C28 67.33(14) . . . . ?
 C11 C12 C13 C14 0.6(2) . . . . ?
 C12 C11 C16 C15 -0.8(2) . . . . ?
 C12 C13 C14 C15 -0.3(2) . . . . ?
 C13 C14 C15 C16 -0.5(2) . . . . ?
 C14 C15 C16 C11 1.0(2) . . . . ?
 C16 C11 C12 C13 0.0(2) . . . . ?
 C17 P1 C5 C6 88.65(13) . . . . ?
 C17 P1 C5 C10 -83.00(14) . . . . ?
 C17 P1 C11 C12 -114.93(13) . . . . ?
 C17 P1 C11 C16 59.12(14) . . . . ?
 C17 P1 C23 C24 7.45(15) . . . . ?
 C17 P1 C23 C28 -174.25(12) . . . . ?
 C17 C18 C19 C20 -0.5(2) . . . . ?
 C18 C17 C22 C21 1.7(3) . . . . ?
 C18 C19 C20 C21 1.8(3) . . . . ?
 C19 C20 C21 C22 -1.4(3) . . . . ?
 C20 C21 C22 C17 -0.4(3) . . . . ?
 C22 C17 C18 C19 -1.3(2) . . . . ?
 C23 P1 C5 C6 -30.68(14) . . . . ?
 C23 P1 C5 C10 157.67(13) . . . . ?
 C23 P1 C11 C12 5.02(14) . . . . ?
 C23 P1 C11 C16 179.07(12) . . . . ?
 C23 P1 C17 C18 74.39(14) . . . . ?
 C23 P1 C17 C22 -105.71(15) . . . . ?
 C23 C24 C25 C26 -1.3(2) . . . . ?
 C24 C23 C28 C27 1.7(2) . . . . ?
 C24 C25 C26 C27 2.1(2) . . . . ?
 C25 C26 C27 C28 -1.0(2) . . . . ?
 C26 C27 C28 C23 -0.9(2) . . . . ?
 C28 C23 C24 C25 -0.5(2) . . . . ?
 N1 B1 B2 B3 108.54(16) . . . . ?
 N1 B1 B2 B6 -111.11(16) . . . . ?
 N1 B1 B2 B7 147.22(14) . . . . ?
 N1 B1 B2 B11 -149.72(14) . . . . ?
 N1 B1 B3 B2 -112.38(16) . . . . ?
 N1 B1 B3 B4 107.45(15) . . . . ?
 N1 B1 B3 B7 -151.15(13) . . . . ?
 N1 B1 B3 B8 145.90(14) . . . . ?
 N1 B1 B4 B3 -110.21(15) . . . . ?
 N1 B1 B4 B5 109.52(15) . . . . ?
 N1 B1 B4 B8 -148.73(13) . . . . ?
 N1 B1 B4 B9 148.16(13) . . . . ?
 N1 B1 B5 B4 -107.52(15) . . . . ?
 N1 B1 B5 B6 112.15(16) . . . . ?
 N1 B1 B5 B9 -146.11(14) . . . . ?
 N1 B1 B5 B10 151.06(13) . . . . ?
 N1 B1 B6 B2 111.71(16) . . . . ?
 N1 B1 B6 B5 -108.14(16) . . . . ?
 N1 B1 B6 B10 -146.79(14) . . . . ?
 N1 B1 B6 B11 150.40(14) . . . . ?
 C1 C2 C3 C4 -65.98(18) . . . . ?
 B1 B2 B3 B4 35.38(11) . . . . ?
 B1 B2 B3 B7 135.87(12) . . . . ?
 B1 B2 B3 B8 98.20(13) . . . . ?
 B1 B2 B6 B5 -35.34(11) . . . . ?
 B1 B2 B6 B10 -98.17(13) . . . . ?
 B1 B2 B6 B11 -135.84(13) . . . . ?
 B1 B2 B7 B3 -38.50(11) . . . . ?
 B1 B2 B7 B8 -1.00(15) . . . . ?
 B1 B2 B7 B11 99.40(13) . . . . ?
 B1 B2 B7 B12 62.42(15) . . . . ?
 B1 B2 B11 B6 38.48(11) . . . . ?
 B1 B2 B11 B7 -99.65(13) . . . . ?
 B1 B2 B11 B10 0.60(16) . . . . ?
 B1 B2 B11 B12 -62.79(15) . . . . ?
 B1 B3 B4 B5 35.30(11) . . . . ?
 B1 B3 B4 B8 135.99(12) . . . . ?
 B1 B3 B4 B9 98.61(13) . . . . ?
 B1 B3 B7 B2 38.65(11) . . . . ?
 B1 B3 B7 B8 -99.30(13) . . . . ?
 B1 B3 B7 B11 1.13(15) . . . . ?
 B1 B3 B7 B12 -62.27(15) . . . . ?
 B1 B3 B8 B4 -38.37(11) . . . . ?
 B1 B3 B8 B7 99.86(13) . . . . ?
 B1 B3 B8 B9 -0.92(15) . . . . ?
 B1 B3 B8 B12 62.84(15) . . . . ?
 B1 B4 B5 B6 35.35(11) . . . . ?
 B1 B4 B5 B9 136.13(13) . . . . ?
 B1 B4 B5 B10 98.63(13) . . . . ?
 B1 B4 B8 B3 38.38(11) . . . . ?
 B1 B4 B8 B7 0.83(16) . . . . ?
 B1 B4 B8 B9 -100.00(13) . . . . ?
 B1 B4 B8 B12 -62.66(15) . . . . ?
 B1 B4 B9 B5 -38.40(11) . . . . ?
 B1 B4 B9 B8 99.33(13) . . . . ?
 B1 B4 B9 B10 -0.93(16) . . . . ?
 B1 B4 B9 B12 62.30(15) . . . . ?
 B1 B5 B6 B2 35.41(11) . . . . ?
 B1 B5 B6 B10 135.76(13) . . . . ?
 B1 B5 B6 B11 98.36(13) . . . . ?
 B1 B5 B9 B4 38.46(11) . . . . ?
 B1 B5 B9 B8 0.93(16) . . . . ?
 B1 B5 B9 B10 -99.54(13) . . . . ?
 B1 B5 B9 B12 -62.14(15) . . . . ?
 B1 B5 B10 B6 -38.70(11) . . . . ?
 B1 B5 B10 B9 99.82(13) . . . . ?
 B1 B5 B10 B11 -1.38(16) . . . . ?
 B1 B5 B10 B12 62.15(15) . . . . ?
 B1 B6 B10 B5 38.51(11) . . . . ?
 B1 B6 B10 B9 1.18(16) . . . . ?
 B1 B6 B10 B11 -99.67(13) . . . . ?
 B1 B6 B10 B12 -62.62(15) . . . . ?
 B1 B6 B11 B2 -38.58(11) . . . . ?
 B1 B6 B11 B7 -1.06(16) . . . . ?
 B1 B6 B11 B10 99.25(13) . . . . ?
 B1 B6 B11 B12 62.21(15) . . . . ?
 B2 B1 B3 B4 -140.18(12) . . . . ?
 B2 B1 B3 B7 -38.77(11) . . . . ?
 B2 B1 B3 B8 -101.72(13) . . . . ?
 B2 B1 B4 B3 37.02(12) . . . . ?
 B2 B1 B4 B5 -103.26(13) . . . . ?
 B2 B1 B4 B8 -1.51(16) . . . . ?
 B2 B1 B4 B9 -64.61(15) . . . . ?
 B2 B1 B5 B4 103.23(13) . . . . ?
 B2 B1 B5 B6 -37.10(12) . . . . ?
 B2 B1 B5 B9 64.65(15) . . . . ?
 B2 B1 B5 B10 1.82(16) . . . . ?
 B2 B1 B6 B5 140.15(13) . . . . ?
 B2 B1 B6 B10 101.50(13) . . . . ?
 B2 B1 B6 B11 38.69(11) . . . . ?
 B2 B3 B4 B1 -35.47(11) . . . . ?
 B2 B3 B4 B5 -0.16(15) . . . . ?
 B2 B3 B4 B8 100.53(13) . . . . ?
 B2 B3 B4 B9 63.14(15) . . . . ?
 B2 B3 B7 B8 -137.95(12) . . . . ?
 B2 B3 B7 B11 -37.51(11) . . . . ?
 B2 B3 B7 B12 -100.92(13) . . . . ?
 B2 B3 B8 B4 -100.79(13) . . . . ?
 B2 B3 B8 B7 37.44(11) . . . . ?
 B2 B3 B8 B9 -63.34(15) . . . . ?
 B2 B3 B8 B12 0.42(16) . . . . ?
 B2 B6 B10 B5 100.77(13) . . . . ?
 B2 B6 B10 B9 63.43(15) . . . . ?
 B2 B6 B10 B11 -37.42(11) . . . . ?
 B2 B6 B10 B12 -0.36(16) . . . . ?
 B2 B6 B11 B7 37.52(11) . . . . ?
 B2 B6 B11 B10 137.84(12) . . . . ?
 B2 B6 B11 B12 100.79(13) . . . . ?
 B2 B7 B8 B3 -37.88(11) . . . . ?
 B2 B7 B8 B4 0.11(16) . . . . ?
 B2 B7 B8 B9 63.80(15) . . . . ?
 B2 B7 B8 B12 100.70(13) . . . . ?
 B2 B7 B11 B6 -37.95(12) . . . . ?
 B2 B7 B11 B10 -101.58(13) . . . . ?
 B2 B7 B11 B12 -138.62(12) . . . . ?
 B2 B7 B12 B8 -100.98(13) . . . . ?
 B2 B7 B12 B9 -64.03(15) . . . . ?
 B2 B7 B12 B10 -0.45(16) . . . . ?
 B2 B7 B12 B11 36.87(11) . . . . ?
 B2 B11 B12 B7 -36.94(11) . . . . ?
 B2 B11 B12 B8 0.86(16) . . . . ?
 B2 B11 B12 B9 64.51(15) . . . . ?
 B2 B11 B12 B10 101.52(13) . . . . ?
 B3 B1 B2 B6 140.36(12) . . . . ?
 B3 B1 B2 B7 38.68(11) . . . . ?
 B3 B1 B2 B11 101.74(13) . . . . ?
 B3 B1 B4 B5 -140.28(12) . . . . ?
 B3 B1 B4 B8 -38.52(11) . . . . ?
 B3 B1 B4 B9 -101.63(13) . . . . ?
 B3 B1 B5 B4 37.02(12) . . . . ?
 B3 B1 B5 B6 -103.31(13) . . . . ?
 B3 B1 B5 B9 -1.56(16) . . . . ?
 B3 B1 B5 B10 -64.39(15) . . . . ?
 B3 B1 B6 B2 -36.86(12) . . . . ?
 B3 B1 B6 B5 103.30(14) . . . . ?
 B3 B1 B6 B10 64.65(15) . . . . ?
 B3 B1 B6 B11 1.83(16) . . . . ?
 B3 B2 B6 B1 35.21(11) . . . . ?
 B3 B2 B6 B5 -0.14(16) . . . . ?
 B3 B2 B6 B10 -62.96(15) . . . . ?
 B3 B2 B6 B11 -100.63(13) . . . . ?
 B3 B2 B7 B8 37.50(11) . . . . ?
 B3 B2 B7 B11 137.90(12) . . . . ?
 B3 B2 B7 B12 100.92(13) . . . . ?
 B3 B2 B11 B6 100.68(13) . . . . ?
 B3 B2 B11 B7 -37.45(11) . . . . ?
 B3 B2 B11 B10 62.80(15) . . . . ?
 B3 B2 B11 B12 -0.59(16) . . . . ?
 B3 B4 B5 B1 -35.27(11) . . . . ?
 B3 B4 B5 B6 0.08(15) . . . . ?
 B3 B4 B5 B9 100.86(13) . . . . ?
 B3 B4 B5 B10 63.36(15) . . . . ?
 B3 B4 B8 B7 -37.55(11) . . . . ?
 B3 B4 B8 B9 -138.38(12) . . . . ?
 B3 B4 B8 B12 -101.05(13) . . . . ?
 B3 B4 B9 B5 -100.70(13) . . . . ?
 B3 B4 B9 B8 37.03(11) . . . . ?
 B3 B4 B9 B10 -63.23(15) . . . . ?
 B3 B4 B9 B12 -0.01(16) . . . . ?
 B3 B7 B8 B4 37.98(11) . . . . ?
 B3 B7 B8 B9 101.68(13) . . . . ?
 B3 B7 B8 B12 138.57(12) . . . . ?
 B3 B7 B11 B2 37.90(11) . . . . ?
 B3 B7 B11 B6 -0.04(16) . . . . ?
 B3 B7 B11 B10 -63.68(15) . . . . ?
 B3 B7 B11 B12 -100.72(13) . . . . ?
 B3 B7 B12 B8 -36.93(11) . . . . ?
 B3 B7 B12 B9 0.02(16) . . . . ?
 B3 B7 B12 B10 63.60(15) . . . . ?
 B3 B7 B12 B11 100.92(13) . . . . ?
 B3 B8 B9 B4 -37.87(11) . . . . ?
 B3 B8 B9 B5 0.00(16) . . . . ?
 B3 B8 B9 B10 63.12(15) . . . . ?
 B3 B8 B9 B12 100.48(13) . . . . ?
 B3 B8 B12 B7 37.07(11) . . . . ?
 B3 B8 B12 B9 -101.85(13) . . . . ?
 B3 B8 B12 B10 -64.38(15) . . . . ?
 B3 B8 B12 B11 -0.79(16) . . . . ?
 B4 B1 B2 B3 -37.11(12) . . . . ?
 B4 B1 B2 B6 103.24(13) . . . . ?
 B4 B1 B2 B7 1.57(16) . . . . ?
 B4 B1 B2 B11 64.63(15) . . . . ?
 B4 B1 B3 B2 140.18(12) . . . . ?
 B4 B1 B3 B7 101.41(13) . . . . ?
 B4 B1 B3 B8 38.45(11) . . . . ?
 B4 B1 B5 B6 -140.33(12) . . . . ?
 B4 B1 B5 B9 -38.59(11) . . . . ?
 B4 B1 B5 B10 -101.42(13) . . . . ?
 B4 B1 B6 B2 -103.31(13) . . . . ?
 B4 B1 B6 B5 36.84(12) . . . . ?
 B4 B1 B6 B10 -1.81(16) . . . . ?
 B4 B1 B6 B11 -64.62(15) . . . . ?
 B4 B3 B7 B2 100.90(13) . . . . ?
 B4 B3 B7 B8 -37.05(11) . . . . ?
 B4 B3 B7 B11 63.38(15) . . . . ?
 B4 B3 B7 B12 -0.02(16) . . . . ?
 B4 B3 B8 B7 138.23(12) . . . . ?
 B4 B3 B8 B9 37.45(11) . . . . ?
 B4 B3 B8 B12 101.21(13) . . . . ?
 B4 B5 B6 B1 -35.38(11) . . . . ?
 B4 B5 B6 B2 0.04(16) . . . . ?
 B4 B5 B6 B10 100.38(13) . . . . ?
 B4 B5 B6 B11 62.98(15) . . . . ?
 B4 B5 B9 B8 -37.53(11) . . . . ?
 B4 B5 B9 B10 -138.01(13) . . . . ?
 B4 B5 B9 B12 -100.60(13) . . . . ?
 B4 B5 B10 B6 -101.16(13) . . . . ?
 B4 B5 B10 B9 37.36(12) . . . . ?
 B4 B5 B10 B11 -63.84(15) . . . . ?
 B4 B5 B10 B12 -0.31(16) . . . . ?
 B4 B8 B9 B5 37.87(11) . . . . ?
 B4 B8 B9 B10 100.99(13) . . . . ?
 B4 B8 B9 B12 138.36(13) . . . . ?
 B4 B8 B12 B7 101.63(13) . . . . ?
 B4 B8 B12 B9 -37.29(12) . . . . ?
 B4 B8 B12 B10 0.18(16) . . . . ?
 B4 B8 B12 B11 63.76(15) . . . . ?
 B4 B9 B10 B5 -37.71(12) . . . . ?
 B4 B9 B10 B6 -0.16(16) . . . . ?
 B4 B9 B10 B11 63.20(15) . . . . ?
 B4 B9 B10 B12 100.28(13) . . . . ?
 B4 B9 B12 B7 -0.01(16) . . . . ?
 B4 B9 B12 B8 36.96(11) . . . . ?
 B4 B9 B12 B10 -101.07(13) . . . . ?
 B4 B9 B12 B11 -63.98(15) . . . . ?
 B5 B1 B2 B3 -103.26(13) . . . . ?
 B5 B1 B2 B6 37.10(12) . . . . ?
 B5 B1 B2 B7 -64.57(15) . . . . ?
 B5 B1 B2 B11 -1.51(16) . . . . ?
 B5 B1 B3 B2 103.27(13) . . . . ?
 B5 B1 B3 B4 -36.90(12) . . . . ?
 B5 B1 B3 B7 64.50(15) . . . . ?
 B5 B1 B3 B8 1.55(16) . . . . ?
 B5 B1 B4 B3 140.28(12) . . . . ?
 B5 B1 B4 B8 101.76(13) . . . . ?
 B5 B1 B4 B9 38.65(11) . . . . ?
 B5 B1 B6 B2 -140.15(13) . . . . ?
 B5 B1 B6 B10 -38.65(11) . . . . ?
 B5 B1 B6 B11 -101.47(13) . . . . ?
 B5 B4 B8 B3 100.68(13) . . . . ?
 B5 B4 B8 B7 63.13(15) . . . . ?
 B5 B4 B8 B9 -37.70(11) . . . . ?
 B5 B4 B8 B12 -0.37(16) . . . . ?
 B5 B4 B9 B8 137.73(13) . . . . ?
 B5 B4 B9 B10 37.47(12) . . . . ?
 B5 B4 B9 B12 100.70(13) . . . . ?
 B5 B6 B10 B9 -37.34(12) . . . . ?
 B5 B6 B10 B11 -138.18(13) . . . . ?
 B5 B6 B10 B12 -101.13(13) . . . . ?
 B5 B6 B11 B2 -100.73(13) . . . . ?
 B5 B6 B11 B7 -63.21(15) . . . . ?
 B5 B6 B11 B10 37.11(11) . . . . ?
 B5 B6 B11 B12 0.06(16) . . . . ?
 B5 B9 B10 B6 37.56(12) . . . . ?
 B5 B9 B10 B11 100.91(13) . . . . ?
 B5 B9 B10 B12 137.99(13) . . . . ?
 B5 B9 B12 B7 63.68(15) . . . . ?
 B5 B9 B12 B8 100.65(13) . . . . ?
 B5 B9 B12 B10 -37.38(11) . . . . ?
 B5 B9 B12 B11 -0.29(16) . . . . ?
 B5 B10 B11 B2 0.49(16) . . . . ?
 B5 B10 B11 B6 -37.72(12) . . . . ?
 B5 B10 B11 B7 63.88(15) . . . . ?
 B5 B10 B11 B12 100.85(13) . . . . ?
 B5 B10 B12 B7 -63.62(15) . . . . ?
 B5 B10 B12 B8 0.08(16) . . . . ?
 B5 B10 B12 B9 37.63(12) . . . . ?
 B5 B10 B12 B11 -101.03(13) . . . . ?
 B6 B1 B2 B3 -140.36(12) . . . . ?
 B6 B1 B2 B7 -101.67(13) . . . . ?
 B6 B1 B2 B11 -38.61(11) . . . . ?
 B6 B1 B3 B2 36.91(12) . . . . ?
 B6 B1 B3 B4 -103.27(13) . . . . ?
 B6 B1 B3 B7 -1.86(16) . . . . ?
 B6 B1 B3 B8 -64.81(15) . . . . ?
 B6 B1 B4 B3 103.35(13) . . . . ?
 B6 B1 B4 B5 -36.92(12) . . . . ?
 B6 B1 B4 B8 64.83(15) . . . . ?
 B6 B1 B4 B9 1.72(16) . . . . ?
 B6 B1 B5 B4 140.33(12) . . . . ?
 B6 B1 B5 B9 101.74(13) . . . . ?
 B6 B1 B5 B10 38.91(12) . . . . ?
 B6 B2 B3 B1 -35.19(11) . . . . ?
 B6 B2 B3 B4 0.18(15) . . . . ?
 B6 B2 B3 B7 100.68(13) . . . . ?
 B6 B2 B3 B8 63.01(15) . . . . ?
 B6 B2 B7 B3 -100.70(13) . . . . ?
 B6 B2 B7 B8 -63.20(15) . . . . ?
 B6 B2 B7 B11 37.20(11) . . . . ?
 B6 B2 B7 B12 0.22(16) . . . . ?
 B6 B2 B11 B7 -138.13(13) . . . . ?
 B6 B2 B11 B10 -37.88(12) . . . . ?
 B6 B2 B11 B12 -101.27(13) . . . . ?
 B6 B5 B9 B4 100.94(13) . . . . ?
 B6 B5 B9 B8 63.41(15) . . . . ?
 B6 B5 B9 B10 -37.07(11) . . . . ?
 B6 B5 B9 B12 0.33(16) . . . . ?
 B6 B5 B10 B9 138.52(13) . . . . ?
 B6 B5 B10 B11 37.31(12) . . . . ?
 B6 B5 B10 B12 100.85(13) . . . . ?
 B6 B10 B11 B2 38.21(12) . . . . ?
 B6 B10 B11 B7 101.60(13) . . . . ?
 B6 B10 B11 B12 138.57(12) . . . . ?
 B6 B10 B12 B7 0.50(16) . . . . ?
 B6 B10 B12 B8 64.20(15) . . . . ?
 B6 B10 B12 B9 101.75(13) . . . . ?
 B6 B10 B12 B11 -36.92(11) . . . . ?
 B6 B11 B12 B7 -101.30(13) . . . . ?
 B6 B11 B12 B8 -63.51(15) . . . . ?
 B6 B11 B12 B9 0.14(16) . . . . ?
 B6 B11 B12 B10 37.15(11) . . . . ?
 B7 B2 B3 B1 -135.87(12) . . . . ?
 B7 B2 B3 B4 -100.49(13) . . . . ?
 B7 B2 B3 B8 -37.67(11) . . . . ?
 B7 B2 B6 B1 98.26(13) . . . . ?
 B7 B2 B6 B5 62.91(15) . . . . ?
 B7 B2 B6 B10 0.09(16) . . . . ?
 B7 B2 B6 B11 -37.58(11) . . . . ?
 B7 B2 B11 B6 138.13(13) . . . . ?
 B7 B2 B11 B10 100.25(13) . . . . ?
 B7 B2 B11 B12 36.85(12) . . . . ?
 B7 B3 B4 B1 -98.59(13) . . . . ?
 B7 B3 B4 B5 -63.29(14) . . . . ?
 B7 B3 B4 B8 37.40(11) . . . . ?
 B7 B3 B4 B9 0.02(16) . . . . ?
 B7 B3 B8 B4 -138.23(12) . . . . ?
 B7 B3 B8 B9 -100.78(13) . . . . ?
 B7 B3 B8 B12 -37.02(11) . . . . ?
 B7 B8 B9 B4 -101.57(13) . . . . ?
 B7 B8 B9 B5 -63.70(15) . . . . ?
 B7 B8 B9 B10 -0.58(16) . . . . ?
 B7 B8 B9 B12 36.79(11) . . . . ?
 B7 B8 B12 B9 -138.92(12) . . . . ?
 B7 B8 B12 B10 -101.45(13) . . . . ?
 B7 B8 B12 B11 -37.87(11) . . . . ?
 B7 B11 B12 B8 37.80(11) . . . . ?
 B7 B11 B12 B9 101.45(13) . . . . ?
 B7 B11 B12 B10 138.46(12) . . . . ?
 B8 B3 B4 B1 -135.99(12) . . . . ?
 B8 B3 B4 B5 -100.69(13) . . . . ?
 B8 B3 B4 B9 -37.38(11) . . . . ?
 B8 B3 B7 B2 137.95(12) . . . . ?
 B8 B3 B7 B11 100.43(13) . . . . ?
 B8 B3 B7 B12 37.03(12) . . . . ?
 B8 B4 B5 B1 -98.21(13) . . . . ?
 B8 B4 B5 B6 -62.87(15) . . . . ?
 B8 B4 B5 B9 37.92(12) . . . . ?
 B8 B4 B5 B10 0.42(16) . . . . ?
 B8 B4 B9 B5 -137.73(13) . . . . ?
 B8 B4 B9 B10 -100.26(13) . . . . ?
 B8 B4 B9 B12 -37.03(12) . . . . ?
 B8 B7 B11 B2 101.03(13) . . . . ?
 B8 B7 B11 B6 63.08(15) . . . . ?
 B8 B7 B11 B10 -0.55(15) . . . . ?
 B8 B7 B11 B12 -37.59(11) . . . . ?
 B8 B7 B12 B9 36.95(12) . . . . ?
 B8 B7 B12 B10 100.53(13) . . . . ?
 B8 B7 B12 B11 137.85(12) . . . . ?
 B8 B9 B10 B5 -100.67(13) . . . . ?
 B8 B9 B10 B6 -63.12(15) . . . . ?
 B8 B9 B10 B11 0.24(16) . . . . ?
 B8 B9 B10 B12 37.32(11) . . . . ?
 B8 B9 B12 B7 -36.97(11) . . . . ?
 B8 B9 B12 B10 -138.03(12) . . . . ?
 B8 B9 B12 B11 -100.94(13) . . . . ?
 B9 B4 B5 B1 -136.13(13) . . . . ?
 B9 B4 B5 B6 -100.79(13) . . . . ?
 B9 B4 B5 B10 -37.50(12) . . . . ?
 B9 B4 B8 B3 138.38(12) . . . . ?
 B9 B4 B8 B7 100.83(13) . . . . ?
 B9 B4 B8 B12 37.33(12) . . . . ?
 B9 B5 B6 B1 -98.61(13) . . . . ?
 B9 B5 B6 B2 -63.19(15) . . . . ?
 B9 B5 B6 B10 37.15(12) . . . . ?
 B9 B5 B6 B11 -0.25(16) . . . . ?
 B9 B5 B10 B6 -138.52(13) . . . . ?
 B9 B5 B10 B11 -101.20(13) . . . . ?
 B9 B5 B10 B12 -37.67(12) . . . . ?
 B9 B8 B12 B7 138.92(12) . . . . ?
 B9 B8 B12 B10 37.47(11) . . . . ?
 B9 B8 B12 B11 101.05(13) . . . . ?
 B9 B10 B11 B2 -63.20(15) . . . . ?
 B9 B10 B11 B6 -101.41(13) . . . . ?
 B9 B10 B11 B7 0.19(16) . . . . ?
 B9 B10 B11 B12 37.16(12) . . . . ?
 B9 B10 B12 B7 -101.25(13) . . . . ?
 B9 B10 B12 B8 -37.55(11) . . . . ?
 B9 B10 B12 B11 -138.67(12) . . . . ?
 B10 B5 B6 B1 -135.76(13) . . . . ?
 B10 B5 B6 B2 -100.35(13) . . . . ?
 B10 B5 B6 B11 -37.40(11) . . . . ?
 B10 B5 B9 B4 138.01(13) . . . . ?
 B10 B5 B9 B8 100.48(13) . . . . ?
 B10 B5 B9 B12 37.40(11) . . . . ?
 B10 B6 B11 B2 -137.84(12) . . . . ?
 B10 B6 B11 B7 -100.31(13) . . . . ?
 B10 B6 B11 B12 -37.04(12) . . . . ?
 B10 B9 B12 B7 101.06(13) . . . . ?
 B10 B9 B12 B8 138.03(12) . . . . ?
 B10 B9 B12 B11 37.09(11) . . . . ?
 B10 B11 B12 B7 -138.46(12) . . . . ?
 B10 B11 B12 B8 -100.66(13) . . . . ?
 B10 B11 B12 B9 -37.01(11) . . . . ?
 B11 B2 B3 B1 -98.10(13) . . . . ?
 B11 B2 B3 B4 -62.72(15) . . . . ?
 B11 B2 B3 B7 37.77(11) . . . . ?
 B11 B2 B3 B8 0.11(16) . . . . ?
 B11 B2 B6 B1 135.84(13) . . . . ?
 B11 B2 B6 B5 100.49(13) . . . . ?
 B11 B2 B6 B10 37.67(11) . . . . ?
 B11 B2 B7 B3 -137.90(12) . . . . ?
 B11 B2 B7 B8 -100.40(13) . . . . ?
 B11 B2 B7 B12 -36.98(11) . . . . ?
 B11 B6 B10 B5 138.18(13) . . . . ?
 B11 B6 B10 B9 100.85(13) . . . . ?
 B11 B6 B10 B12 37.05(11) . . . . ?
 B11 B7 B8 B3 -100.98(13) . . . . ?
 B11 B7 B8 B4 -63.00(15) . . . . ?
 B11 B7 B8 B9 0.70(15) . . . . ?
 B11 B7 B8 B12 37.59(11) . . . . ?
 B11 B7 B12 B8 -137.85(12) . . . . ?
 B11 B7 B12 B9 -100.90(13) . . . . ?
 B11 B7 B12 B10 -37.32(11) . . . . ?
 B11 B10 B12 B7 37.42(11) . . . . ?
 B11 B10 B12 B8 101.12(13) . . . . ?
 B11 B10 B12 B9 138.67(12) . . . . ?
 B12 B7 B8 B3 -138.57(12) . . . . ?
 B12 B7 B8 B4 -100.59(13) . . . . ?
 B12 B7 B8 B9 -36.89(11) . . . . ?
 B12 B7 B11 B2 138.62(12) . . . . ?
 B12 B7 B11 B6 100.68(13) . . . . ?
 B12 B7 B11 B10 37.05(11) . . . . ?
 B12 B8 B9 B4 -138.36(13) . . . . ?
 B12 B8 B9 B5 -100.49(13) . . . . ?
 B12 B8 B9 B10 -37.36(11) . . . . ?
 B12 B9 B10 B5 -137.99(13) . . . . ?
 B12 B9 B10 B6 -100.44(13) . . . . ?
 B12 B9 B10 B11 -37.08(12) . . . . ?
 B12 B10 B11 B2 -100.36(13) . . . . ?
 B12 B10 B11 B6 -138.57(12) . . . . ?
 B12 B10 B11 B7 -36.97(11) . . . . ?

_shelx_res_file
;
TITL 22kub41_0m_a.res in P-1
    22kub41_0m_a.res
    created by SHELXL-2018/3 at 11:07:36 on 08-Sep-2022
REM Old TITL Integration of 22kub41
REM SHELXT solution in P-1
REM R1 0.111, Rweak 0.006, Alpha 0.037, Orientation as input
REM Formula found by SHELXT: C29 B11 N Cl
CELL 0.71073 10.0762 11.4133 15.7198 103.483 95.907 113.512
ZERR 2 0.0021 0.0025 0.0043 0.012 0.01 0.009
LATT 1
SFAC C H B N P
UNIT 56 76 24 2 2

L.S. 10
PLAN  5
SIZE 0.8 0.6 0.1
TEMP -173.15
CONF
LIST 4
MORE -1
BOND $H
fmap 2
acta
OMIT -7 7 16
OMIT -8 7 15
OMIT -4 7 17
OMIT -9 7 14
OMIT -8 6 17
OMIT -9 6 16
OMIT -10 6 14
OMIT -9 5 16
OMIT 1 3 1
OMIT -11 4 15
OMIT -9 5 17
REM <olex2.extras>
REM <HklSrc "%.\\22kub41_0m_a.hkl">
REM </olex2.extras>

WGHT    0.053000    1.262300
FVAR       1.19976
P1    5    0.794853    0.537573    0.626120    11.00000    0.01621    0.01536 =
         0.01164    0.00450    0.00470    0.00971
C5    1    0.940572    0.527783    0.696619    11.00000    0.01896    0.01937 =
         0.01405    0.00514    0.00529    0.01300
C6    1    0.903178    0.415611    0.727861    11.00000    0.02108    0.02214 =
         0.01920    0.00854    0.00713    0.01245
AFIX  43
H6    2    0.807089    0.342780    0.706099    11.00000   -1.20000
AFIX   0
C7    1    1.007891    0.411648    0.791050    11.00000    0.03006    0.02876 =
         0.02151    0.01309    0.00901    0.02046
AFIX  43
H7    2    0.983499    0.335182    0.811566    11.00000   -1.20000
AFIX   0
C8    1    1.147966    0.519165    0.824214    11.00000    0.02684    0.03350 =
         0.01861    0.00754    0.00317    0.02101
AFIX  43
H8    2    1.218458    0.516478    0.867830    11.00000   -1.20000
AFIX   0
C9    1    1.184577    0.630343    0.793492    11.00000    0.02035    0.02584 =
         0.02510    0.00355   -0.00003    0.01264
AFIX  43
H9    2    1.280252    0.703551    0.816293    11.00000   -1.20000
AFIX   0
C10   1    1.081923    0.635430    0.729359    11.00000    0.02121    0.01848 =
         0.02329    0.00672    0.00430    0.01167
AFIX  43
H10   2    1.107779    0.711322    0.708110    11.00000   -1.20000
AFIX   0
C11   1    0.854302    0.627076    0.545824    11.00000    0.01844    0.01870 =
         0.01362    0.00751    0.00592    0.01193
C12   1    0.786795    0.562577    0.454271    11.00000    0.02171    0.02027 =
         0.01456    0.00433    0.00538    0.01174
AFIX  43
H12   2    0.717805    0.470638    0.434960    11.00000   -1.20000
AFIX   0
C13   1    0.820498    0.632630    0.391983    11.00000    0.02842    0.02874 =
         0.01286    0.00648    0.00639    0.01855
AFIX  43
H13   2    0.773797    0.588655    0.330369    11.00000   -1.20000
AFIX   0
C14   1    0.922114    0.766570    0.419463    11.00000    0.02639    0.02849 =
         0.01961    0.01346    0.00994    0.01724
AFIX  43
H14   2    0.945397    0.814147    0.376712    11.00000   -1.20000
AFIX   0
C15   1    0.990090    0.831297    0.510079    11.00000    0.02321    0.02166 =
         0.02190    0.00983    0.00463    0.01027
AFIX  43
H15   2    1.060193    0.922851    0.528578    11.00000   -1.20000
AFIX   0
C16   1    0.956384    0.763296    0.573663    11.00000    0.02239    0.02090 =
         0.01497    0.00613    0.00281    0.01074
AFIX  43
H16   2    1.001904    0.808459    0.635325    11.00000   -1.20000
AFIX   0
C17   1    0.710297    0.620081    0.698130    11.00000    0.01662    0.01707 =
         0.01229    0.00323    0.00423    0.00978
C18   1    0.681651    0.585114    0.776296    11.00000    0.01940    0.01645 =
         0.01698    0.00662    0.00507    0.00872
AFIX  43
H18   2    0.704804    0.517550    0.789687    11.00000   -1.20000
AFIX   0
C19   1    0.619367    0.649189    0.834304    11.00000    0.02184    0.02228 =
         0.01363    0.00557    0.00690    0.00942
AFIX  43
H19   2    0.599226    0.625047    0.887097    11.00000   -1.20000
AFIX   0
C20   1    0.586549    0.749039    0.814732    11.00000    0.02211    0.02369 =
         0.01902    0.00417    0.00891    0.01337
AFIX  43
H20   2    0.546677    0.794705    0.855182    11.00000   -1.20000
AFIX   0
C21   1    0.611952    0.781982    0.736287    11.00000    0.03991    0.03494 =
         0.02844    0.01543    0.01594    0.02987
AFIX  43
H21   2    0.587287    0.848689    0.722736    11.00000   -1.20000
AFIX   0
C22   1    0.673399    0.717708    0.677403    11.00000    0.03638    0.03457 =
         0.01952    0.01520    0.01418    0.02769
AFIX  43
H22   2    0.690121    0.739946    0.623633    11.00000   -1.20000
AFIX   0
C23   1    0.663754    0.369232    0.564490    11.00000    0.01950    0.01591 =
         0.01236    0.00400    0.00378    0.00891
C24   1    0.514094    0.322569    0.567382    11.00000    0.02046    0.02215 =
         0.01365    0.00673    0.00456    0.01118
AFIX  43
H24   2    0.480207    0.378789    0.603987    11.00000   -1.20000
AFIX   0
C25   1    0.414436    0.192387    0.515959    11.00000    0.02093    0.02375 =
         0.02145    0.01058    0.00131    0.00684
AFIX  43
H25   2    0.312657    0.159193    0.518519    11.00000   -1.20000
AFIX   0
C26   1    0.463781    0.111376    0.461105    11.00000    0.03126    0.01783 =
         0.01801    0.00661   -0.00097    0.00799
AFIX  43
H26   2    0.394882    0.024020    0.424808    11.00000   -1.20000
AFIX   0
C27   1    0.613643    0.157246    0.458888    11.00000    0.03624    0.01965 =
         0.01771    0.00527    0.00632    0.01587
AFIX  43
H27   2    0.646770    0.100744    0.421879    11.00000   -1.20000
AFIX   0
C28   1    0.714504    0.285678    0.510858    11.00000    0.02467    0.02039 =
         0.01875    0.00669    0.00848    0.01280
AFIX  43
H28   2    0.816927    0.316906    0.510224    11.00000   -1.20000
AFIX   0

N1    4    0.662045    1.105717    0.885325    11.00000    0.01768    0.02027 =
         0.02013    0.00585    0.00519    0.00932
C1    1    0.765635    1.096567    0.911413    11.00000    0.01868    0.01930 =
         0.02439    0.00644    0.00535    0.00873
C2    1    0.898527    1.090600    0.951581    11.00000    0.01697    0.02187 =
         0.02980    0.00856    0.00485    0.01114
AFIX  23
H2A   2    0.963256    1.092139    0.908143    11.00000   -1.20000
H2B   2    0.870954    1.006220    0.967475    11.00000   -1.20000
AFIX   0
C3    1    0.982358    1.211494    1.036468    11.00000    0.02026    0.02804 =
         0.01994    0.00846    0.00666    0.01337
AFIX  23
H3A   2    0.914290    1.212792    1.077442    11.00000   -1.20000
H3B   2    1.065381    1.200963    1.067815    11.00000   -1.20000
AFIX   0
C4    1    1.043276    1.343923    1.015394    11.00000    0.02692    0.02237 =
         0.02661    0.00420    0.00189    0.01030
AFIX 137
H4A   2    1.112775    1.344134    0.976097    11.00000   -1.50000
H4B   2    1.095001    1.417493    1.071245    11.00000   -1.50000
H4C   2    0.961365    1.355603    0.985239    11.00000   -1.50000
AFIX   0
B1    3    0.525131    1.125593    0.859913    11.00000    0.01426    0.01728 =
         0.01636    0.00602    0.00318    0.00784
B2    3    0.366960    0.998809    0.779215    11.00000    0.01666    0.01630 =
         0.01496    0.00338    0.00427    0.00767
AFIX 153
H2    2    0.360006    0.899329    0.742024    11.00000   -1.20000
AFIX   0
B3    3    0.363226    1.040843    0.896389    11.00000    0.01505    0.01664 =
         0.01578    0.00684    0.00359    0.00721
AFIX 153
H3    2    0.353986    0.968728    0.935643    11.00000   -1.20000
AFIX   0
B4    3    0.474361    1.218954    0.945595    11.00000    0.01651    0.01785 =
         0.01312    0.00399    0.00327    0.00785
AFIX 153
H4    2    0.537664    1.263189    1.017043    11.00000   -1.20000
AFIX   0
B5    3    0.546828    1.286410    0.858980    11.00000    0.01664    0.01676 =
         0.01601    0.00565    0.00274    0.00590
AFIX 153
H5    2    0.657631    1.374586    0.873750    11.00000   -1.20000
AFIX   0
B6    3    0.480933    1.150875    0.756008    11.00000    0.01793    0.01876 =
         0.01544    0.00581    0.00485    0.00790
AFIX 153
H6A   2    0.548403    1.150653    0.703678    11.00000   -1.20000
AFIX   0
B7    3    0.211030    1.016310    0.814151    11.00000    0.01402    0.01725 =
         0.01655    0.00520    0.00390    0.00636
AFIX 153
H7A   2    0.100375    0.927984    0.799466    11.00000   -1.20000
AFIX   0
B8    3    0.277773    1.151279    0.916208    11.00000    0.01608    0.01963 =
         0.01480    0.00481    0.00495    0.00947
AFIX 153
H8A   2    0.210925    1.151478    0.968879    11.00000   -1.20000
AFIX   0
B9    3    0.389854    1.302720    0.893383    11.00000    0.02030    0.01626 =
         0.01710    0.00358    0.00370    0.00968
AFIX 153
H9A   2    0.396634    1.402145    0.930541    11.00000   -1.20000
AFIX   0
B10   3    0.393700    1.260653    0.777167    11.00000    0.02023    0.01725 =
         0.01678    0.00719    0.00363    0.00848
AFIX 153
H10A  2    0.403108    1.332988    0.738071    11.00000   -1.20000
AFIX   0
B11   3    0.283966    1.084096    0.727864    11.00000    0.01823    0.01869 =
         0.01316    0.00469    0.00214    0.00824
AFIX 153
H11   2    0.221465    1.040256    0.656247    11.00000   -1.20000
AFIX   0
B12   3    0.227322    1.177048    0.812305    11.00000    0.01746    0.01976 =
         0.01735    0.00612    0.00197    0.01011
AFIX 153
H12A  2    0.126774    1.193998    0.796201    11.00000   -1.20000
AFIX   0
HKLF 4


REM  22kub41_0m_a.res in P-1
REM wR2 = 0.1336, GooF = S = 1.061, Restrained GooF = 1.061 for all data
REM R1 = 0.0488 for 7016 Fo > 4sig(Fo) and 0.0585 for all 8269 data
REM 380 parameters refined using 0 restraints

END

WGHT      0.0530      1.2623

REM Highest difference peak  0.455,  deepest hole -0.355,  1-sigma level  0.061
Q1    1   0.8266  0.5738  0.5786  11.00000  0.05    0.46
Q2    1   0.7202  0.4464  0.5927  11.00000  0.05    0.43
Q3    1   0.7714  0.5707  0.6727  11.00000  0.05    0.40
Q4    1   0.8976  0.6990  0.5527  11.00000  0.05    0.39
Q5    1   0.9373  1.1511  0.9968  11.00000  0.05    0.37
;
_shelx_res_checksum                49715
_shelx_hkl_file
;
  -1   0   0  186.75    5.55
   1   0   0  180.60    6.39
  -2   0   0  111.12    6.81
  -2   0   0  112.57    4.39
   2   0   0  117.22    4.38
  -3   0   0  776.82   22.69
  -3   0   0  761.47   25.51
   3   0   0  781.74   22.67
  -4   0   0    8.85    2.25
  -4   0   0    7.17    5.39
  -4   0   0    5.49    5.20
   4   0   0    8.53    2.32
  -5   0   0  624.76   24.56
  -5   0   0  614.27   23.58
  -5   0   0  633.07   19.70
  -6   0   0   88.78    8.96
  -6   0   0   82.68    5.72
  -6   0   0   90.70    5.40
  -6   0   0   96.77   10.14
  -7   0   0  881.60   34.47
  -7   0   0  906.23   36.99
  -7   0   0  885.56   27.65
  -7   0   0  868.97   27.92
  -8   0   0   29.02   12.80
  -8   0   0   18.42    4.61
  -8   0   0   17.11    3.60
  -9   0   0   -1.02    2.91
  -9   0   0    2.27    2.72
  -9   0   0    0.59    6.51
 -10   0   0  445.03   17.22
 -10   0   0  491.25   27.12
 -10   0   0  469.10   17.03
 -11   0   0    5.08    3.34
 -11   0   0   13.65    9.20
 -11   0   0    6.80    3.13
 -12   1   0  120.33   16.87
 -12   1   0  110.16    6.87
 -11   1   0  246.24   11.33
 -11   1   0  239.81   10.91
 -11   1   0  242.82   20.18
 -10   1   0  164.98    9.05
 -10   1   0  165.32   16.42
 -10   1   0  158.60    8.56
  -9   1   0   14.23    3.23
  -9   1   0   15.81    3.84
  -9   1   0    2.76    7.20
  -8   1   0 2282.56   74.12
  -8   1   0 2342.26   67.71
  -8   1   0 2386.44   75.49
  -7   1   0    4.21    2.75
  -7   1   0    0.91    5.09
  -7   1   0    2.98    4.53
  -7   1   0    1.77    2.05
  -6   1   0   88.47    5.75
  -6   1   0   80.40    8.27
  -6   1   0   85.85    5.23
  -6   1   0   90.25    9.72
  -5   1   0    3.48    4.84
  -5   1   0    5.63    4.58
  -5   1   0    5.93    2.76
  -5   1   0    4.28    2.28
  -4   1   0  235.19    9.09
  -4   1   0  227.38   11.92
  -4   1   0  252.73    8.82
  -3   1   0 4157.28  115.96
  -3   1   0 4205.29  117.92
   2  -1   0   28.91    2.95
  -2   1   0   27.86    2.72
  -2   1   0   30.06    3.64
   1  -1   0  121.58    4.33
   1  -1   0  139.67    4.60
   0  -1   0 1628.34   45.19
  -2  -1   0 4207.16  119.26
  -2  -1   0 4349.69  117.43
  -2  -1   0 4169.71  119.57
  -3  -1   0    1.83    1.69
  -3  -1   0   -4.41    3.58
  -3  -1   0    0.35    3.24
   3   1   0    1.58    1.64
  -4  -1   0  246.61    9.50
  -4  -1   0  250.67   14.04
  -4  -1   0  242.81   12.98
   4   1   0  258.52    9.45
  -5  -1   0  623.55   24.81
  -5  -1   0  565.73   23.44
  -5  -1   0  655.41   19.93
   5   1   0  621.52   19.67
  -6  -1   0  815.51   31.66
  -6  -1   0  862.65   26.87
  -6  -1   0  883.50   33.09
   6   1   0  886.04   26.91
  -7  -1   0   43.42    4.95
  -7  -1   0   45.47    9.28
  -7  -1   0   57.68    8.85
  -8  -1   0   30.70    4.56
  -8  -1   0   28.98    8.50
  -9  -1   0   31.29    4.52
  -9  -1   0   28.57    9.29
  -9  -1   0   32.38    4.58
 -10  -1   0  101.63    7.32
 -10  -1   0   98.87    7.00
 -10  -1   0   99.67   14.36
 -11  -1   0    9.00    3.20
 -11  -1   0    2.98    9.12
 -12   2   0   20.53    9.93
 -12   2   0   27.99    4.17
 -11   2   0    1.72    2.84
 -11   2   0   -0.12    2.48
 -11   2   0    7.87    7.93
 -10   2   0  147.31    8.32
 -10   2   0  133.23   14.69
 -10   2   0  152.39    8.77
  -9   2   0  394.49   14.91
  -9   2   0  385.93   15.29
  -8   2   0  115.92    7.45
  -8   2   0  120.80   11.24
  -8   2   0  128.48   12.75
  -8   2   0  118.67    7.10
  -7   2   0  818.60   25.88
  -7   2   0  828.75   30.85
  -7   2   0  795.11   29.84
  -7   2   0  781.97   25.43
  -6   2   0  342.10   12.22
  -6   2   0  323.77   15.28
  -6   2   0  329.75   12.42
  -6   2   0  320.25   15.95
  -5   2   0 1136.75   37.44
  -5   2   0 1129.46   34.38
  -5   2   0 1178.46   34.30
   4  -2   0   39.30    4.33
  -4   2   0   52.35    6.15
  -4   2   0   35.47    4.19
   3  -2   0 1818.88   51.73
  -3   2   0 1808.78   51.70
  -3   2   0 1812.20   52.44
   1  -2   0  552.19   16.77
  -1   2   0  538.16   16.66
   0  -2   0 2226.66   60.15
   0  -2   0 2098.61   59.77
   0   2   0 2106.52   59.99
   0   2   0 2109.67   59.77
  -1  -2   0 4051.40  113.40
  -2  -2   0 6637.70  186.31
  -2  -2   0 6496.81  185.79
  -2  -2   0 6815.90  184.05
   2   2   0 6666.84  183.96
  -3  -2   0  991.94   36.91
  -3  -2   0 1008.37   34.23
  -3  -2   0 1031.51   30.69
   3   2   0 1059.21   30.71
  -4  -2   0    9.68    2.69
  -4  -2   0   11.52    5.65
  -4  -2   0    3.76    3.93
   4   2   0    6.85    2.47
  -5  -2   0  129.16   11.36
  -5  -2   0  120.04   10.16
  -5  -2   0  125.48    6.77
   5   2   0  120.35    6.50
  -6  -2   0  985.79   40.50
  -6  -2   0 1036.99   38.08
  -6  -2   0 1017.76   31.43
   6   2   0  990.82   31.10
  -7  -2   0  542.32   20.83
  -7  -2   0  489.03   37.00
   7   2   0  499.95   17.92
  -8  -2   0   14.88    8.53
  -8  -2   0   15.93    3.71
  -9  -2   0  210.57   10.22
  -9  -2   0  211.91   18.42
  -9  -2   0  191.44   10.24
 -10  -2   0  117.26    7.73
 -10  -2   0  139.60    8.42
 -10  -2   0  131.16   16.95
 -11  -2   0   54.63    7.53
 -13   3   0  656.87   47.56
 -12   3   0   85.43   14.12
 -12   3   0   65.62    6.52
 -12   3   0   74.48    6.28
 -11   3   0  540.99   27.75
 -11   3   0  525.68   19.74
 -11   3   0  530.13   19.38
 -10   3   0   59.87    6.33
 -10   3   0   63.82    6.12
 -10   3   0   68.60   11.06
  -9   3   0  168.35    8.99
  -9   3   0  175.38   13.46
  -9   3   0  155.82   14.38
  -9   3   0  171.24    9.45
  -8   3   0   72.59    6.53
  -8   3   0   79.86    9.49
  -8   3   0   83.57   10.80
  -8   3   0   77.89    6.23
  -7   3   0  727.54   27.19
  -7   3   0  733.12   27.96
  -7   3   0  736.54   23.93
   6  -3   0   35.47    4.63
  -6   3   0   32.80    4.27
  -6   3   0   34.42    6.49
  -6   3   0   36.30    5.74
   5  -3   0   17.55    3.99
  -5   3   0   23.48    3.93
  -5   3   0   22.20    5.25
   4  -3   0 5698.51  158.10
   4  -3   0 5650.40  158.66
  -4   3   0 5776.61  158.66
  -4   3   0 5558.26  157.90
   3  -3   0 4237.26  118.11
  -3   3   0 4243.64  118.60
   2  -3   0   97.41    5.58
   2  -3   0  100.06    3.98
  -2   3   0   99.04    5.45
  -2   3   0  104.66    3.94
   1  -3   0  292.27   10.60
   1  -3   0  277.61    8.83
  -1   3   0  294.50    8.97
  -1   3   0  292.70   10.54
   0  -3   0   95.08    5.43
   0  -3   0   92.15    4.95
   0   3   0   95.30    5.28
  -1  -3   0  252.66    9.56
  -1  -3   0  259.32   10.65
   1   3   0  218.86    9.05
  -2  -3   0  566.59   21.20
  -2  -3   0  570.97   20.69
  -2  -3   0  571.57   18.80
   2   3   0  575.71   18.71
  -3  -3   0 4889.68  131.98
  -3  -3   0 4565.95  135.23
  -3  -3   0 4606.99  134.60
   3   3   0 4752.87  131.83
  -4  -3   0  195.47    8.91
  -4  -3   0  196.63   12.80
  -4  -3   0  179.19   11.58
   4   3   0  200.57    8.74
  -5  -3   0  340.76   17.19
  -5  -3   0  317.72   12.75
  -5  -3   0  307.58   17.61
   5   3   0  314.19   16.60
  -6  -3   0   99.22   11.35
  -6  -3   0  108.61    7.37
  -6  -3   0  106.89   12.37
   6   3   0   95.90    6.70
  -7  -3   0  287.48   12.54
  -7  -3   0  294.64   19.27
   7   3   0  277.84   12.08
  -8  -3   0   17.05    8.54
  -8  -3   0   28.61    4.59
   8   3   0   29.61    4.53
  -9  -3   0   70.55   12.76
  -9  -3   0   73.40    6.59
 -10  -3   0   19.01   10.01
 -10  -3   0   16.96    4.18
 -13   4   0   -3.42    7.56
 -13   4   0    2.51    2.45
 -12   4   0   56.28    6.54
 -12   4   0   70.89    6.42
 -12   4   0   85.97   13.71
 -11   4   0  350.38   21.44
 -11   4   0  329.66   14.45
 -11   4   0  352.23   15.03
 -10   4   0   59.39    6.63
 -10   4   0   60.63   10.78
 -10   4   0   55.82    6.30
  -9   4   0  108.48    7.93
  -9   4   0  106.10    7.73
  -9   4   0  104.78   10.94
  -9   4   0  102.03   12.33
  -8   4   0  311.02   15.99
  -8   4   0  302.52   16.83
  -8   4   0  298.98   13.18
  -8   4   0  312.76   13.14
   7  -4   0  631.13   21.70
  -7   4   0  601.85   23.71
  -7   4   0  599.48   23.14
  -7   4   0  622.68   21.33
   6  -4   0  924.12   32.23
  -6   4   0  992.49   30.72
  -6   4   0  980.20   32.10
  -6   4   0  936.37   33.89
   5  -4   0   25.00    4.43
  -5   4   0   20.25    4.75
  -5   4   0   12.80    3.56
   4  -4   0   27.95    4.35
   4  -4   0   23.95    4.44
  -4   4   0   17.00    4.15
  -4   4   0   34.43    4.54
   3  -4   0  473.08   16.31
   3  -4   0  457.77   14.30
  -3   4   0  462.67   16.09
  -3   4   0  443.00   14.04
   2  -4   0  240.96   10.02
  -2   4   0  224.96    9.62
   1  -4   0 2903.45   82.62
   1  -4   0 2877.32   80.66
  -1   4   0 2863.87   80.73
  -1   4   0 2951.59   82.57
   0  -4   0 1533.89   45.08
   0  -4   0 1494.30   44.35
   0   4   0 1536.55   45.00
  -1  -4   0 2256.43   67.31
  -1  -4   0 2391.25   68.59
  -1  -4   0 2305.04   67.99
   1   4   0 2384.50   67.45
  -2  -4   0  418.98   17.64
  -2  -4   0  397.46   15.02
  -3  -4   0  219.88   10.12
  -3  -4   0  216.78   12.21
  -3  -4   0  231.23   13.30
   3   4   0  246.98   14.46
  -4  -4   0  319.68   13.03
  -4  -4   0  327.53   17.30
  -4  -4   0  303.73   15.81
   4   4   0  309.52   12.69
  -5  -4   0 2025.72   64.90
  -5  -4   0 1869.51   63.24
  -5  -4   0 2039.95   58.94
   5   4   0 1973.63   58.64
  -6  -4   0  131.48   18.89
  -6  -4   0  111.11    8.19
   6   4   0  109.00    7.53
  -7  -4   0   26.96    9.12
  -7  -4   0   24.76    4.62
   7   4   0   32.67    4.74
  -8  -4   0  452.21   26.09
  -8  -4   0  458.55   17.74
   8   4   0  427.31   17.01
  -9  -4   0   90.00   14.16
  -9  -4   0   75.63    7.32
 -10  -4   0   55.47    6.43
 -13   5   0    0.72    2.35
 -13   5   0   -5.29    7.86
 -12   5   0   -4.20    6.76
 -12   5   0    6.94    3.33
 -11   5   0  119.17    8.91
 -11   5   0  132.42    8.86
 -11   5   0  105.60   12.92
 -10   5   0  144.99    9.10
 -10   5   0  138.95   13.29
 -10   5   0  134.31    9.35
 -10   5   0  128.00   11.98
  -9   5   0  484.32   18.92
  -9   5   0  497.04   22.45
  -9   5   0  490.53   19.00
  -9   5   0  477.23   21.62
   8  -5   0  570.61   20.86
  -8   5   0  532.49   22.01
  -8   5   0  512.37   22.31
  -8   5   0  553.17   20.21
   7  -5   0  268.00   12.41
  -7   5   0  245.77   11.77
  -7   5   0  258.30   13.22
  -7   5   0  240.47   12.47
   6  -5   0 2622.04   75.43
  -6   5   0 2595.19   75.16
  -6   5   0 2522.23   74.87
  -6   5   0 2544.99   75.09
   5  -5   0 1242.69   39.60
  -5   5   0 1267.55   39.49
  -5   5   0 1314.98   38.57
   4  -5   0  414.70   16.47
  -4   5   0  435.62   13.96
  -4   5   0  406.84   16.00
   3  -5   0  895.12   31.81
  -3   5   0  980.23   30.37
   2  -5   0    8.04    4.34
  -2   5   0   12.17    5.15
   1  -5   0 4253.69  121.75
   1  -5   0 4238.57  119.21
  -1   5   0 4370.91  123.30
   0  -5   0  169.96    8.72
   0  -5   0  168.54    9.11
   0   5   0  182.87    9.36
  -1  -5   0   17.07    4.91
  -1  -5   0   17.87    4.07
  -1  -5   0   12.71    4.11
   1   5   0   20.83    4.10
  -2  -5   0  275.37   11.65
  -2  -5   0  281.62   13.68
   2   5   0  196.36   10.17
  -3  -5   0  118.57   10.65
  -3  -5   0  117.01    9.73
  -3  -5   0  113.66    7.90
   3   5   0  114.26    7.41
  -4  -5   0   13.56    5.54
  -4  -5   0    8.96    6.22
  -4  -5   0    8.02    3.92
   4   5   0   12.19    3.62
  -5  -5   0  203.32   15.41
  -5  -5   0  176.17   10.43
  -5  -5   0  173.03   13.64
   5   5   0  189.87   10.05
  -6  -5   0  420.62   17.37
  -6  -5   0  451.85   23.82
   6   5   0  404.79   16.68
  -7  -5   0   12.19    8.28
  -7  -5   0    8.93    4.11
   7   5   0   23.59    4.13
  -8  -5   0  355.98   15.81
  -8  -5   0  363.44   24.21
   8   5   0  353.87   15.14
  -9  -5   0  195.87   11.17
  -9  -5   0  210.96   20.77
 -14   6   0  253.36   21.21
 -13   6   0    5.24    3.25
 -13   6   0    2.04    7.61
 -12   6   0  263.91   13.57
 -12   6   0  285.53   19.17
 -12   6   0  276.22   13.70
 -11   6   0   49.92    6.47
 -11   6   0   48.14    6.39
 -11   6   0   53.97    9.90
 -10   6   0  312.49   17.71
 -10   6   0  309.22   16.97
 -10   6   0  296.92   14.46
   9  -6   0   52.14    6.88
  -9   6   0   37.53    5.94
  -9   6   0   45.24    7.93
  -9   6   0   37.90    7.14
   8  -6   0 1028.29   34.30
  -8   6   0  985.73   34.55
  -8   6   0 1021.11   34.52
  -8   6   0 1012.02   33.69
   7  -6   0  406.67   16.85
  -7   6   0  370.95   16.17
  -7   6   0  383.05   16.36
  -7   6   0  391.17   16.18
   6  -6   0  286.45   13.12
  -6   6   0  272.95   11.53
  -6   6   0  258.99   12.39
  -6   6   0  262.11   11.36
   5  -6   0  527.46   19.67
  -5   6   0  506.78   16.69
  -5   6   0  514.00   19.29
   4  -6   0   20.70    4.41
  -4   6   0   25.59    4.92
   3  -6   0   10.14    4.09
  -3   6   0    9.70    3.56
   2  -6   0  303.32   13.70
  -2   6   0  314.30   13.49
   1  -6   0    7.98    2.92
   1  -6   0    5.13    4.18
   1  -6   0   11.56    3.20
  -1   6   0    8.42    3.62
   0  -6   0    3.09    2.98
   0  -6   0    3.84    3.52
   0  -6   0    1.81    3.41
   0   6   0    2.04    2.87
  -1  -6   0   96.69    7.73
  -1  -6   0  105.03    8.94
   1   6   0  104.28    7.54
  -2  -6   0  325.87   16.01
  -2  -6   0  324.67   14.39
   2   6   0  330.43   14.11
  -3  -6   0  463.20   18.67
  -3  -6   0  476.56   21.73
  -3  -6   0  470.84   20.59
  -4  -6   0    2.54    4.10
  -4  -6   0    1.97    5.16
  -4  -6   0    6.70    6.40
   4   6   0    5.25    3.27
  -5  -6   0  229.79   12.49
  -5  -6   0  218.59   16.79
   5   6   0  226.81   11.80
  -6  -6   0  587.24   28.36
  -6  -6   0  559.25   21.92
   6   6   0  545.88   21.19
  -7  -6   0   10.60    8.35
  -7  -6   0    9.95    4.64
   7   6   0   18.52    4.13
  -8  -6   0    5.93    4.06
  -8  -6   0    2.42    8.06
  -9  -6   0  421.43   19.73
 -14   7   0   27.54    4.60
 -14   7   0    8.79    8.38
 -13   7   0   27.96    5.20
 -13   7   0   16.64    8.52
 -12   7   0   -3.66    3.34
 -12   7   0   -6.87    5.74
 -11   7   0   96.84   11.36
 -11   7   0   72.11    7.94
 -11   7   0   89.71    8.57
  10  -7   0  535.52   21.69
 -10   7   0  509.58   24.48
 -10   7   0  481.72   22.46
 -10   7   0  498.65   20.69
   9  -7   0   60.82    7.71
  -9   7   0   47.48   10.12
  -9   7   0   54.05    7.45
  -9   7   0   60.93    8.23
   8  -7   0 1065.09   35.77
  -8   7   0 1014.62   34.31
  -8   7   0 1034.93   34.31
  -8   7   0 1031.80   35.07
   7  -7   0   -0.36    4.00
  -7   7   0   -1.52    3.10
  -7   7   0   -0.86    3.79
  -7   7   0    3.03    3.68
   6  -7   0 1895.61   58.11
  -6   7   0 1894.90   57.64
  -6   7   0 1891.68   54.28
  -6   7   0 1828.37   54.48
   5  -7   0   25.74    5.38
  -5   7   0   29.68    5.11
   4  -7   0  127.18    9.16
  -4   7   0  128.49    8.85
   3  -7   0  182.22   10.33
  -3   7   0  145.14    9.17
   2  -7   0   11.12    4.17
   2  -7   0   10.03    2.49
  -2   7   0   10.24    3.91
   1  -7   0    5.24    3.10
   1  -7   0    4.11    2.76
   1  -7   0    8.57    4.17
  -1   7   0    3.67    3.18
   0  -7   0   60.04    6.11
   0  -7   0   65.52    7.11
   0  -7   0   68.11    6.79
   0   7   0   67.75    6.78
  -1  -7   0 2211.71   68.07
  -1  -7   0 2264.48   68.93
  -1  -7   0 2285.14   68.65
   1   7   0 2348.38   68.73
  -2  -7   0  302.99   15.45
  -2  -7   0  330.63   16.90
  -2  -7   0  335.81   15.40
   2   7   0  329.61   14.89
  -3  -7   0  117.59   10.21
  -3  -7   0  108.22   11.73
  -3  -7   0  113.57    9.50
  -4  -7   0  251.31   16.90
  -4  -7   0  237.21   13.22
  -4  -7   0  220.34   14.98
   4   7   0  250.64   18.95
  -5  -7   0    2.30    4.34
  -5  -7   0    1.72    6.90
   5   7   0    5.90    3.66
  -6  -7   0  490.33   20.55
  -6  -7   0  473.49   26.16
   6   7   0  477.51   19.58
  -7  -7   0    1.52    5.34
  -7  -7   0   -4.68   13.02
  -8  -7   0  440.69   19.39
 -14   8   0   67.92    7.28
 -13   8   0  422.96   22.75
 -13   8   0  393.93   18.52
 -12   8   0   20.42    5.50
 -12   8   0   13.37    6.92
  11  -8   0   87.77    9.95
 -11   8   0   82.23   10.17
 -11   8   0  103.39    9.54
  10  -8   0   23.21    6.14
 -10   8   0   26.59    6.64
 -10   8   0   27.10    6.13
 -10   8   0   37.75    7.27
   9  -8   0   10.61    5.68
  -9   8   0    7.47    4.32
  -9   8   0   -0.76    4.63
  -9   8   0   -1.06    3.89
   8  -8   0  178.10   12.22
  -8   8   0  174.15   10.04
  -8   8   0  152.46   11.08
   7  -8   0    0.52    4.37
  -7   8   0    0.85    4.33
  -7   8   0    0.30    2.99
  -7   8   0    2.72    3.45
   6  -8   0   14.89    5.29
  -6   8   0   13.32    4.73
   5  -8   0 1105.94   37.48
  -5   8   0 1120.08   37.33
   4  -8   0    1.46    4.14
  -4   8   0    6.09    4.10
   3  -8   0  243.81   13.11
  -3   8   0  223.22   12.31
   2  -8   0   92.27    9.03
   2  -8   0   86.71    5.13
  -2   8   0   96.64    8.25
   1  -8   0   50.64    5.95
   1  -8   0   47.68    7.11
   1  -8   0   54.24    5.47
  -1   8   0   52.14    6.96
   0  -8   0  329.79   15.95
   0  -8   0  339.93   15.52
   0   8   0  309.79   15.20
  -1  -8   0   11.48    5.52
  -1  -8   0   15.29    4.93
  -1  -8   0   16.66    5.87
   1   8   0    2.59    7.20
  -2  -8   0   99.82    9.62
  -2  -8   0   77.45    8.91
  -2  -8   0   82.14   10.33
   2   8   0   95.28    8.73
  -3  -8   0   46.18    8.65
  -3  -8   0   45.69    7.08
   3   8   0   25.44    4.73
  -4  -8   0  443.32   19.52
  -4  -8   0  412.68   22.44
   4   8   0  434.98   18.76
  -5  -8   0   26.71    8.55
  -5  -8   0   28.00    6.28
  -6  -8   0  103.96   14.55
  -6  -8   0   98.86   10.10
  -7  -8   0    2.61    8.16
  -7  -8   0    7.30    4.99
 -13   9   0  218.74   14.05
 -13   9   0  217.77   15.77
  12  -9   0   11.16    5.46
 -12   9   0    6.14    6.80
  11  -9   0   62.44    9.00
 -11   9   0   62.47    8.57
 -11   9   0   78.97    9.52
  10  -9   0    7.83    5.36
 -10   9   0    2.55    4.73
 -10   9   0    1.75    3.95
   9  -9   0    6.52    5.16
  -9   9   0    1.72    3.48
  -9   9   0   -0.65    4.69
   8  -9   0   76.89   10.28
  -8   9   0   72.16    6.55
  -8   9   0   72.09    6.16
   7  -9   0 1285.93   43.06
  -7   9   0 1224.44   42.18
   6  -9   0  207.82   13.46
  -6   9   0  206.10   12.84
   5  -9   0  685.80   26.93
  -5   9   0  706.22   26.65
   4  -9   0    7.46    4.91
  -4   9   0    5.84    4.10
   3  -9   0  117.15   10.32
  -3   9   0   99.32    9.25
   2  -9   0  810.93   29.83
  -2   9   0  789.06   29.28
   1  -9   0  338.14   17.56
   1  -9   0  384.62   15.04
   1  -9   0  369.90   14.40
  -1   9   0  360.80   16.98
   0  -9   0   99.63   10.16
   0  -9   0   85.59    7.61
   0  -9   0   91.02    8.84
   0   9   0   85.61    8.92
  -1  -9   0  190.37   11.55
  -1  -9   0  180.34   12.75
  -1  -9   0  180.22   12.45
   1   9   0  171.81   13.01
  -2  -9   0   31.91    7.97
  -2  -9   0   43.03    8.66
  -2  -9   0   47.48    8.30
  -3  -9   0  109.51   10.84
  -4  -9   0  102.72   13.13
  -4  -9   0  102.15   10.76
  -5  -9   0   29.60    9.45
  -5  -9   0   10.27    5.66
  -6  -9   0   55.01    7.91
  -6  -9   0   35.68   10.31
 -13  10   0   82.79   10.04
  12 -10   0   93.15   11.06
 -12  10   0   81.61    9.58
  11 -10   0   24.70    6.67
 -11  10   0   26.04    5.96
  10 -10   0  113.36   11.78
 -10  10   0  117.59    8.87
 -10  10   0  119.76    8.49
   9 -10   0  347.97   18.66
  -9  10   0  352.38   13.69
   8 -10   0   61.40    9.30
   7 -10   0  165.92   13.19
   6 -10   0   17.29    6.16
   5 -10   0  426.76   20.34
   4 -10   0   70.07    9.41
   3 -10   0  467.65   21.45
   2 -10   0    7.27    5.88
   1 -10   0  110.57   11.18
   1 -10   0  103.23    8.11
   1 -10   0  106.01    7.48
   0 -10   0    6.76    5.88
   0 -10   0   13.55    5.07
   0 -10   0   18.61    4.58
  -1 -10   0    6.57    5.26
  -1 -10   0    9.10    3.88
  -1 -10   0    0.13    5.34
  -2 -10   0   36.72    8.02
  -2 -10   0   33.53    7.16
  -3 -10   0   -0.57    5.16
  -3 -10   0    2.81    6.42
  -4 -10   0   20.05    7.04
  -4 -10   0   19.71    8.27
  -5 -10   0   65.66    9.43
  13 -11   0  161.53   14.63
  12 -11   0  112.25   12.54
 -12  11   0  106.82    9.50
  11 -11   0   32.56    8.36
 -11  11   0   33.32    5.38
  10 -11   0   -2.99    5.26
   9 -11   0   -2.95    4.81
   8 -11   0  646.56   27.83
   7 -11   0  226.72   15.80
   6 -11   0   19.97    6.53
   5 -11   0  150.52   13.00
   4 -11   0  213.92   14.57
   3 -11   0   43.63    8.02
   2 -11   0  655.16   27.62
   1 -11   0   21.38    6.67
   1 -11   0   34.57    5.01
   1 -11   0   25.15    5.86
   0 -11   0  542.52   24.70
   0 -11   0  553.87   20.67
   0 -11   0  513.27   21.44
  -1 -11   0   53.24    9.07
  -1 -11   0   43.04    8.01
  -2 -11   0  647.51   28.06
  -2 -11   0  639.86   27.94
  -3 -11   0   34.82    8.10
  -3 -11   0    0.19    6.88
  -4 -11   0   25.48    8.84
  -4 -11   0   10.95    6.70
  12 -12   0   37.52    8.73
  10 -12   0  117.56   12.83
   9 -12   0   27.93    7.96
   8 -12   0  547.27   25.72
   7 -12   0   28.50    7.56
   6 -12   0   91.71   11.74
   5 -12   0  133.58   12.95
   4 -12   0  310.37   18.45
   3 -12   0  245.25   16.71
   2 -12   0   54.79    9.73
   1 -12   0   -3.38    5.64
   1 -12   0    0.14    3.48
   0 -12   0   83.45   10.98
   0 -12   0   85.77    9.11
  -1 -12   0   58.87    9.97
  -1 -12   0   60.50    8.50
  -2 -12   0   86.64   11.37
  -3 -12   0  135.68   13.39
  -3 -12   0  106.86   13.41
  11 -13   0   25.51    7.86
  10 -13   0  239.37   17.76
   9 -13   0  395.48   22.65
   7 -13   0    7.54    6.71
   6 -13   0   -0.90    5.72
   5 -13   0  410.16   22.18
   4 -13   0  144.32   14.42
   3 -13   0   55.24    9.85
   1 -13   0   38.54    9.34
   0 -13   0  122.05   10.25
   0 -13   0  131.24   14.37
  -1 -13   0   18.84    7.81
   8 -14   0   69.88   11.83
   7 -14   0  196.30   16.94
   6 -14   0   27.21    8.95
   5 -14   0   64.80   10.96
   4 -14   0  158.47   15.80
   3 -14   0    0.84    6.67
   2 -14   0  192.83   21.41
   3 -14   1  125.43   14.11
   4 -14   1    4.74    7.12
   5 -14   1  148.66   15.17
   6 -14   1    5.25    6.58
   7 -14   1   20.51    8.29
   8 -14   1    7.93    7.08
   9 -14   1   30.23    8.58
  -2 -13   1   95.94   11.72
  -1 -13   1  117.00   13.63
   0 -13   1  276.16   14.61
   0 -13   1  249.16   17.74
   1 -13   1  237.63   10.68
   1 -13   1  240.04   12.17
   1 -13   1  251.91   18.50
   2 -13   1   -9.50    5.98
   3 -13   1   -2.11    5.47
   4 -13   1   24.02    8.55
   5 -13   1  192.39   15.93
   6 -13   1  134.51   13.84
   7 -13   1  517.99   25.59
   8 -13   1    7.17    7.04
   9 -13   1   17.02   11.01
  10 -13   1  255.59   18.08
  11 -13   1    0.21    6.42
  12 -13   1   -4.88    6.17
  -3 -12   1   16.40    7.11
  -3 -12   1   12.15    7.21
  -2 -12   1  108.13   12.31
   0 -12   1   10.11    7.01
   1 -12   1   87.35    6.26
   1 -12   1   72.89   11.07
   1 -12   1   56.30    7.03
   2 -12   1   24.65    7.32
   3 -12   1  251.32   16.74
   4 -12   1    2.91    6.01
   5 -12   1   22.22    7.25
   6 -12   1  117.59   12.37
   7 -12   1   64.29   10.07
   8 -12   1   26.00    7.56
   9 -12   1    9.76    6.49
  10 -12   1   42.02    8.62
  11 -12   1  136.84   13.46
  12 -12   1    0.68    5.42
  -4 -11   1   28.92    8.93
  -4 -11   1   32.69    8.36
  -3 -11   1    0.13    5.69
  -3 -11   1   -5.70    5.61
  -2 -11   1   -0.67    5.75
  -2 -11   1    2.66    5.73
  -1 -11   1  395.32   19.95
  -1 -11   1  363.97   18.55
  -1 -11   1  372.91   20.11
   0 -11   1   18.28    5.46
   0 -11   1   10.63    6.17
   0 -11   1   24.33    4.87
   1 -11   1   -1.08    5.25
   1 -11   1    1.90    3.91
   1 -11   1    4.55    3.18
   2 -11   1   54.46    5.80
   2 -11   1   50.04    8.68
   2 -11   1   43.22    5.11
   3 -11   1   30.54    7.74
   4 -11   1  206.21   14.60
   5 -11   1  270.72   16.38
   6 -11   1  256.17   16.30
   7 -11   1  335.66   18.65
   8 -11   1   30.84    7.49
   9 -11   1  248.42   16.17
 -10  11  -1  111.97    7.86
  10 -11   1  103.33   11.70
 -11  11  -1    0.34    4.12
  11 -11   1    4.64    5.83
 -12  11  -1   -0.55    4.46
  12 -11   1   -2.70    4.76
 -13  11  -1   74.22   10.50
  13 -11   1   70.87   10.43
  -6 -10   1   69.16    9.61
  -5 -10   1   86.25   10.45
  -5 -10   1   88.92   13.30
  -4 -10   1  232.90   17.84
  -4 -10   1  232.36   15.96
  -3 -10   1   54.67    9.00
  -3 -10   1   48.28    9.11
  -2 -10   1  161.73   13.60
  -2 -10   1  175.91   11.64
  -2 -10   1  165.47   13.32
  -1 -10   1   98.17    9.03
  -1 -10   1   93.97   10.52
  -1 -10   1   88.26   10.11
   0 -10   1    7.08    5.84
   0 -10   1   14.02    4.42
   0 -10   1    2.80    4.79
   1 -10   1   37.19    7.69
   2 -10   1   56.47    8.58
   2 -10   1   44.87    5.74
   2 -10   1   44.95    4.90
   3 -10   1   -2.81    6.16
   5 -10   1  156.87   17.18
   6 -10   1  229.62   14.55
   7 -10   1    0.91    4.90
   8 -10   1  258.59   15.66
  -9  10  -1   99.27    7.98
   9 -10   1   95.23   10.81
 -10  10  -1   32.21    5.45
 -10  10  -1   23.55    5.62
  10 -10   1   23.37    6.51
 -11  10  -1   40.59    6.98
  11 -10   1   29.70    6.95
 -12  10  -1   -2.52    5.21
  12 -10   1    7.18    5.61
 -13  10  -1   36.68    7.92
  -7  -9   1  106.76   11.61
  -6  -9   1   10.96    5.76
  -6  -9   1    9.27    8.49
  -5  -9   1    6.39    7.41
  -5  -9   1   24.83    6.54
  -4  -9   1  295.13   19.10
  -4  -9   1  268.63   15.91
  -3  -9   1   26.15    6.74
  -3  -9   1   27.22    8.90
  -3  -9   1   14.38    6.09
  -2  -9   1  240.96   16.12
  -2  -9   1  232.63   15.21
  -2  -9   1  222.98   13.85
   1   9  -1  682.08   27.31
  -1  -9   1  682.92   27.13
  -1  -9   1  727.45   27.40
  -1  -9   1  705.54   26.10
   0   9  -1 1086.91   36.83
   0  -9   1 1069.28   35.53
   0  -9   1 1023.19   36.85
   0  -9   1 1033.66   34.44
  -1   9  -1   62.33    7.39
   1  -9   1   66.40    8.11
   1  -9   1   70.61    7.27
   1  -9   1   73.32    6.77
  -2   9  -1  460.11   19.45
   2  -9   1  449.30   15.24
   2  -9   1  431.21   15.81
   2  -9   1  437.71   19.83
  -3   9  -1  332.79   15.97
   3  -9   1  333.43   16.65
  -4   9  -1  419.89   18.80
   4  -9   1  462.12   19.91
  -5   9  -1   32.75    6.29
   5  -9   1   40.31    6.98
  -6   9  -1  445.71   19.25
   6  -9   1  435.73   19.66
  -7   9  -1    2.35    3.13
  -7   9  -1    2.87    4.05
  -7   9  -1    5.35    2.99
   7  -9   1   14.06    6.00
  -8   9  -1   62.40    7.05
  -8   9  -1   71.69    8.48
  -8   9  -1   64.68    6.38
   8  -9   1   62.52    8.28
  -9   9  -1    1.56    3.69
  -9   9  -1   -0.35    4.26
   9  -9   1    0.67    5.52
 -10   9  -1  352.47   16.89
 -10   9  -1  368.24   17.04
  10  -9   1  368.42   18.53
 -11   9  -1  121.60   11.13
 -11   9  -1  148.14   10.76
  11  -9   1  139.82   11.94
 -12   9  -1  235.99   15.47
  12  -9   1  235.81   14.97
 -13   9  -1   21.26    5.76
 -13   9  -1   18.52    7.30
  -7  -8   1  127.09   11.25
  -7  -8   1  128.55   16.95
  -6  -8   1  130.61   15.48
  -6  -8   1  121.48   10.88
  -5  -8   1   30.46    6.64
  -5  -8   1   36.09    9.57
  -4  -8   1  140.92   14.00
  -4  -8   1  135.49   10.94
   3   8  -1   99.35    8.78
  -3  -8   1   88.26    9.59
  -3  -8   1   85.69   11.27
   2   8  -1  768.53   27.90
  -2  -8   1  781.59   29.79
  -2  -8   1  734.95   28.36
  -2  -8   1  741.73   28.19
  -1  -8   1 1935.51   59.46
  -1  -8   1 1811.31   58.13
  -1  -8   1 1933.72   59.28
   0   8  -1  603.13   23.12
   0  -8   1  589.38   21.63
   0  -8   1  610.41   23.06
   0  -8   1  606.69   23.46
  -1   8  -1  219.75   12.04
   1  -8   1  220.56   10.16
   1  -8   1  227.65   12.86
   1  -8   1  230.65   10.79
  -2   8  -1  146.70    9.74
   2  -8   1  144.68   10.38
   2  -8   1  141.35    6.83
  -3   8  -1   55.68    6.88
   3  -8   1   40.14    6.07
  -4   8  -1    4.87    3.78
   4  -8   1    2.37    3.89
  -5   8  -1  453.46   18.75
   5  -8   1  460.41   19.38
  -6   8  -1  957.65   29.51
  -6   8  -1  990.66   33.40
   6  -8   1  965.68   33.69
  -7   8  -1   32.13    5.12
  -7   8  -1   32.56    6.04
   7  -8   1   30.54    6.55
  -8   8  -1  262.91   15.71
  -8   8  -1  243.62   12.37
  -8   8  -1  257.86   12.68
   8  -8   1  254.53   14.27
  -9   8  -1  120.11   10.05
  -9   8  -1   97.67    9.07
  -9   8  -1  123.89    9.48
   9  -8   1  119.76   10.60
 -10   8  -1   30.43    6.34
 -10   8  -1   24.07    6.58
 -10   8  -1   19.99    5.29
  10  -8   1   28.09    6.48
 -11   8  -1    1.13    3.20
 -11   8  -1   -2.54    5.38
  11  -8   1    0.59    4.40
 -12   8  -1  610.13   26.66
 -12   8  -1  602.61   27.25
 -13   8  -1  195.05   11.75
 -13   8  -1  203.46   16.78
  -8  -7   1   58.30    7.60
  -8  -7   1   78.60   17.84
  -7  -7   1   40.21    6.97
  -7  -7   1   36.25   10.84
   6   7  -1   36.94    5.18
  -6  -7   1   41.92   10.29
  -6  -7   1   40.76    6.94
   5   7  -1   11.27    3.85
  -5  -7   1   16.86    5.29
  -5  -7   1    4.10    6.74
  -4  -7   1  187.41   13.72
  -4  -7   1  174.21   11.82
  -4  -7   1  196.69   15.27
   3   7  -1  220.69   12.07
  -3  -7   1  251.28   15.80
  -3  -7   1  218.66   13.83
  -3  -7   1  219.72   12.70
   2   7  -1  231.12   12.25
  -2  -7   1  202.54   12.61
  -2  -7   1  266.40   14.82
  -2  -7   1  233.29   12.79
   1   7  -1    4.00    3.44
  -1  -7   1    5.85    3.90
  -1  -7   1    5.58    4.38
  -1  -7   1    4.28    4.67
   0   7  -1    6.34    3.59
   0  -7   1    6.55    4.00
   0  -7   1    9.91    3.44
   0  -7   1   13.25    4.26
  -1   7  -1  309.42   13.62
   1  -7   1  298.03   11.72
   1  -7   1  298.90   13.92
  -2   7  -1  795.54   24.25
  -2   7  -1  791.76   27.14
   2  -7   1  767.87   27.33
   2  -7   1  801.30   23.90
  -3   7  -1   13.56    3.76
   3  -7   1    3.67    3.94
  -4   7  -1    3.51    3.34
   4  -7   1   -0.89    3.32
  -5   7  -1   29.92    5.03
  -5   7  -1   20.16    3.41
   5  -7   1   21.51    3.33
   5  -7   1   12.20    4.42
  -6   7  -1  170.13    8.74
  -6   7  -1  184.00   10.36
   6  -7   1  169.65    8.94
   6  -7   1  155.70   10.45
  -7   7  -1  607.39   23.10
  -7   7  -1  647.69   22.44
   7  -7   1  637.79   23.81
  -8   7  -1    8.03    4.23
  -8   7  -1    9.26    4.64
  -8   7  -1   15.65    5.49
   8  -7   1   14.68    5.11
  -9   7  -1  906.93   33.18
  -9   7  -1  929.82   31.93
  -9   7  -1  951.23   33.30
   9  -7   1  929.25   32.54
 -10   7  -1  391.91   19.41
 -10   7  -1  391.57   18.54
 -10   7  -1  374.45   18.80
  10  -7   1  376.39   17.52
 -11   7  -1  113.95    8.92
 -11   7  -1  119.95   12.51
 -11   7  -1  130.65    9.63
 -12   7  -1   50.33    6.66
 -12   7  -1   47.54    9.40
 -12   7  -1   61.70    7.08
 -13   7  -1   25.25    4.91
 -13   7  -1   29.33    9.48
 -14   7  -1   44.28   11.07
  -9  -6   1  209.66   12.43
   8   6  -1 1024.78   36.22
  -8  -6   1 1080.57   36.66
  -8  -6   1 1103.42   46.03
   7   6  -1   15.82    3.67
  -7  -6   1   -0.82    6.79
  -7  -6   1    1.07    4.02
   6   6  -1  203.84   16.19
  -6  -6   1  198.98   17.06
  -6  -6   1  195.91   11.99
   5   6  -1  152.52    9.74
  -5  -6   1  148.88   14.60
  -5  -6   1  155.91   10.43
   4   6  -1   83.46    7.61
  -4  -6   1   94.16   11.80
  -4  -6   1   90.13    8.50
  -4  -6   1   94.65   10.47
   3   6  -1  110.68    7.93
  -3  -6   1  122.65    9.07
  -3  -6   1  109.07   10.01
  -3  -6   1  124.72   11.71
   2   6  -1  146.01    8.90
  -2  -6   1  147.56    9.47
  -2  -6   1  138.09   10.72
   1   6  -1 1235.35   39.73
  -1  -6   1 1293.76   40.40
  -1  -6   1 1268.82   40.08
   0   6  -1   30.19    4.82
   0  -6   1   33.08    4.57
   0  -6   1   27.12    4.76
  -1   6  -1 1178.52   35.28
  -1   6  -1 1191.54   37.02
   1  -6   1 1146.76   37.04
   1  -6   1 1165.06   34.90
  -2   6  -1    1.57    3.43
  -2   6  -1   -1.75    2.51
   2  -6   1   -2.81    2.44
   2  -6   1    1.77    3.86
  -3   6  -1   52.24    6.05
   3  -6   1   48.89    5.96
  -4   6  -1  173.61    9.36
  -4   6  -1  164.93    7.37
   4  -6   1  163.17    7.33
   4  -6   1  170.83    9.90
  -5   6  -1  575.28   20.48
  -5   6  -1  560.35   18.71
   5  -6   1  573.38   20.74
   5  -6   1  557.53   19.07
  -6   6  -1   89.72    7.09
  -6   6  -1   97.78    7.37
   6  -6   1   97.26    7.79
   6  -6   1   91.90    7.32
  -7   6  -1  470.18   18.57
  -7   6  -1  457.38   17.85
   7  -6   1  453.59   18.18
  -8   6  -1 2826.15   81.99
  -8   6  -1 2737.78   83.28
  -8   6  -1 2718.21   83.57
   8  -6   1 2866.82   82.56
  -9   6  -1  654.65   26.10
  -9   6  -1  651.46   26.48
  -9   6  -1  641.81   23.53
   9  -6   1  653.66   24.20
 -10   6  -1   41.56    7.50
 -10   6  -1   34.35    5.55
 -10   6  -1   41.22    8.29
 -11   6  -1   43.17    9.35
 -11   6  -1   45.33    5.94
 -11   6  -1   50.23    6.42
 -12   6  -1  227.80   17.80
 -12   6  -1  205.80   13.85
 -12   6  -1  227.86   11.57
 -13   6  -1   15.51   11.01
 -13   6  -1   38.08    4.98
  -9  -5   1   49.84   12.56
  -9  -5   1   61.41    7.09
   8   5  -1   32.33    7.80
  -8  -5   1   25.55    5.36
  -8  -5   1   25.38    9.92
   7   5  -1  248.09   12.26
  -7  -5   1  250.85   19.13
  -7  -5   1  252.94   12.86
   6   5  -1  387.79   16.32
  -6  -5   1  421.93   22.96
  -6  -5   1  385.93   16.73
   5   5  -1    1.68    3.09
  -5  -5   1    2.93    5.09
  -5  -5   1    4.72    6.50
  -5  -5   1    3.35    3.87
   4   5  -1 2110.01   61.73
  -4  -5   1 2056.20   66.18
  -4  -5   1 2089.30   65.25
  -4  -5   1 1987.74   61.57
  -3  -5   1  206.32   12.93
  -3  -5   1  175.28    9.85
  -3  -5   1  178.56   11.64
   2   5  -1    9.92    3.04
  -2  -5   1    8.62    4.06
  -2  -5   1    6.04    4.39
  -2  -5   1    7.01    3.37
   1   5  -1    4.01    3.04
  -1  -5   1    3.07    3.61
  -1  -5   1   -1.50    3.37
   0   5  -1    7.76    3.91
   0   5  -1   10.27    3.21
   0  -5   1    5.37    3.74
  -1   5  -1 1382.11   39.99
   1  -5   1 1352.73   41.56
   1  -5   1 1352.89   39.65
  -2   5  -1    0.90    3.44
  -2   5  -1    0.33    2.56
   2  -5   1   -2.18    2.40
   2  -5   1    6.92    3.79
  -3   5  -1  778.82   23.56
  -3   5  -1  770.48   27.11
   3  -5   1  797.42   26.06
   3  -5   1  807.95   23.61
  -4   5  -1  530.45   17.46
   4  -5   1  522.07   19.03
   4  -5   1  531.40   17.75
  -5   5  -1    4.10    3.24
  -5   5  -1   10.94    3.96
   5  -5   1    5.37    3.49
  -6   5  -1  371.17   14.44
  -6   5  -1  373.34   15.52
   6  -5   1  372.57   14.85
   6  -5   1  363.58   15.49
  -7   5  -1   60.69    5.96
  -7   5  -1   60.62    7.36
   7  -5   1   56.45    6.45
  -8   5  -1  749.94   28.97
  -8   5  -1  792.23   28.71
  -8   5  -1  764.93   25.94
   8  -5   1  767.48   26.45
  -9   5  -1  219.04   16.85
  -9   5  -1  217.63   11.16
  -9   5  -1  227.36   15.23
  -9   5  -1  232.74   11.23
 -10   5  -1    1.84    7.72
 -10   5  -1    9.73    3.70
 -10   5  -1   11.90    3.79
 -11   5  -1  362.99   14.92
 -11   5  -1  336.59   14.48
 -11   5  -1  329.38   20.49
 -12   5  -1   32.08    5.09
 -12   5  -1   41.46    5.30
 -12   5  -1   36.56   10.18
 -13   5  -1   16.45    8.98
 -13   5  -1   11.67    3.18
 -10  -4   1   79.47    7.40
   9   4  -1    4.38    3.88
  -9  -4   1   10.51    4.17
  -9  -4   1    6.40    8.58
   8   4  -1  109.01    8.14
  -8  -4   1  135.02   15.61
  -8  -4   1  128.99    9.01
   7   4  -1  245.92   11.66
  -7  -4   1  215.11   17.64
  -7  -4   1  235.58   12.12
   6   4  -1   52.06    6.01
  -6  -4   1   55.25    6.32
  -6  -4   1   51.18   13.18
   5   4  -1    2.53    2.91
  -5  -4   1   -7.21    5.30
  -5  -4   1    2.57    3.14
   4   4  -1  179.55    9.12
  -4  -4   1  177.58   11.92
  -4  -4   1  162.02   12.68
  -4  -4   1  183.12    9.45
  -3  -4   1  362.76   18.88
  -3  -4   1  339.30   16.41
  -3  -4   1  323.96   15.34
   2   4  -1 1679.69   48.82
  -2  -4   1 1603.62   48.73
   1   4  -1 1698.37   51.29
   1   4  -1 1740.75   50.73
  -1  -4   1 1719.52   50.74
   0   4  -1 1112.36   33.66
   0   4  -1 1091.61   33.32
   0  -4   1 1097.07   33.19
   0  -4   1 1136.34   33.88
  -1   4  -1  103.74    5.23
  -1   4  -1  105.12    6.13
   1  -4   1  104.73    5.13
   1  -4   1  114.29    6.53
  -2   4  -1  570.58   18.60
  -2   4  -1  569.35   16.91
   2  -4   1  544.59   16.79
   2  -4   1  568.35   18.74
  -3   4  -1  385.28   12.87
  -3   4  -1  388.12   13.93
   3  -4   1  386.69   13.09
   3  -4   1  395.39   14.20
  -4   4  -1   47.35    4.92
  -4   4  -1   53.89    6.42
   4  -4   1   50.24    5.62
   4  -4   1   52.40    5.42
  -5   4  -1  491.64   18.41
  -5   4  -1  501.26   17.24
   5  -4   1  494.67   18.61
   5  -4   1  495.43   17.55
  -6   4  -1 1375.92   42.11
  -6   4  -1 1362.48   39.74
   6  -4   1 1198.48   39.59
  -7   4  -1  456.49   19.66
   7  -4   1  455.61   17.00
  -8   4  -1  538.68   18.92
  -8   4  -1  515.18   22.40
  -8   4  -1  534.87   18.95
  -8   4  -1  534.25   23.35
  -9   4  -1  217.78   10.45
  -9   4  -1  205.81   10.04
  -9   4  -1  226.15   15.59
  -9   4  -1  197.82   14.18
 -10   4  -1    1.40    3.23
 -10   4  -1    2.10    6.66
 -10   4  -1    6.96    3.14
 -11   4  -1  346.24   14.08
 -11   4  -1  356.10   14.44
 -11   4  -1  353.16   21.70
 -12   4  -1   88.90    6.34
 -12   4  -1   91.58   13.93
 -12   4  -1   63.60    6.23
 -13   4  -1   -9.44    7.32
 -10  -3   1   47.94    7.83
 -10  -3   1   67.12    6.88
 -10  -3   1   78.73   13.99
  -9  -3   1   16.75    8.22
  -9  -3   1   23.12    4.81
   8   3  -1  257.23   11.94
  -8  -3   1  281.45   20.20
  -8  -3   1  249.17   12.29
   7   3  -1  196.78   10.16
  -7  -3   1  193.31   16.42
  -7  -3   1  209.07   10.69
   6   3  -1 1692.45   51.45
  -6  -3   1 1738.29   58.48
  -6  -3   1 1725.87   57.26
  -6  -3   1 1725.34   51.84
   5   3  -1 1337.70   41.32
  -5  -3   1 1344.22   45.83
  -5  -3   1 1376.76   41.64
  -5  -3   1 1392.72   47.11
   4   3  -1 1034.63   31.93
  -4  -3   1 1070.34   36.46
  -4  -3   1  980.14   35.03
  -4  -3   1 1029.13   32.01
   3   3  -1  932.59   28.13
  -3  -3   1  876.50   28.07
  -3  -3   1  881.04   30.51
  -3  -3   1  899.26   31.34
  -2  -3   1  137.91    9.07
  -2  -3   1  144.49    7.60
   1   3  -1 1024.28   31.95
   1   3  -1 1042.01   31.25
  -1  -3   1 1059.84   31.35
   0   3  -1   20.84    2.85
   0   3  -1   24.73    2.98
   0  -3   1   22.22    2.89
   0  -3   1   20.26    2.81
  -1   3  -1  523.71   16.02
  -1   3  -1  533.90   16.96
   1  -3   1  540.88   17.12
   1  -3   1  533.31   15.98
  -2   3  -1  271.31    9.10
  -2   3  -1  269.28    9.83
   2  -3   1  282.22   10.06
   2  -3   1  260.97    9.07
  -3   3  -1 2157.20   59.89
  -3   3  -1 2190.41   60.03
   3  -3   1 2159.65   60.16
   3  -3   1 1891.00   59.66
  -4   3  -1   69.17    5.11
  -4   3  -1   72.93    6.91
   4  -3   1   48.24    5.65
   4  -3   1   58.38    5.08
  -5   3  -1 2946.28   87.60
  -5   3  -1 3053.11   85.31
   5  -3   1 3100.36   88.02
   5  -3   1 2946.76   85.38
  -6   3  -1  374.12   13.46
  -6   3  -1  385.23   17.07
   6  -3   1  381.13   13.78
   6  -3   1  343.94   16.48
  -7   3  -1  316.24   12.38
  -7   3  -1  358.89   17.48
  -7   3  -1  342.67   12.85
  -8   3  -1  271.63   11.02
  -8   3  -1  263.68   11.25
  -8   3  -1  256.93   15.72
  -8   3  -1  274.93   16.76
  -9   3  -1  205.18   13.65
  -9   3  -1  206.72   16.00
  -9   3  -1  240.19   10.40
  -9   3  -1  216.97   15.24
 -10   3  -1   55.24    5.82
 -10   3  -1   66.17    5.58
 -10   3  -1   77.61   11.66
 -11   3  -1   52.63   11.14
 -11   3  -1   48.27    5.06
 -11   3  -1   48.60    5.51
 -12   3  -1   69.41    5.48
 -12   3  -1   68.06   17.06
 -11  -2   1   14.16    3.78
 -10  -2   1   14.06   14.92
 -10  -2   1    8.40    3.61
 -10  -2   1   -1.39    3.01
  -9  -2   1   41.88    5.48
  -9  -2   1   36.76   10.55
  -9  -2   1   32.14    5.22
  -8  -2   1   12.79    8.19
  -8  -2   1    2.18    3.19
   7   2  -1  257.08   11.18
  -7  -2   1  243.08   18.52
  -7  -2   1  243.34   11.37
  -7  -2   1  241.23   17.34
   6   2  -1    2.70    2.58
  -6  -2   1    4.68    5.59
  -6  -2   1    1.43    5.69
  -6  -2   1    5.39    3.62
   5   2  -1  429.18   15.51
  -5  -2   1  435.40   15.76
  -5  -2   1  482.45   21.02
  -5  -2   1  428.94   19.31
   4   2  -1   44.94    4.61
  -4  -2   1   51.52    6.61
  -4  -2   1   49.07    4.92
  -4  -2   1   48.31    7.90
   3   2  -1 3399.16   94.21
  -3  -2   1 3263.42   96.58
  -3  -2   1 3369.58   94.27
   2   2  -1 3505.54  100.31
  -2  -2   1 3578.73   98.67
  -2  -2   1 3482.20  100.22
   1   2  -1  249.57    9.91
   1   2  -1  248.87    8.84
  -1  -2   1  255.43    9.10
  -1  -2   1  237.62    9.59
   0   2  -1 4026.30  108.89
   0  -2   1 3821.78  108.74
  -1   2  -1  811.73   23.88
  -1   2  -1  811.22   23.49
   1  -2   1  815.08   23.94
   1  -2   1  825.10   23.48
  -2   2  -1 2127.81   59.55
  -2   2  -1 2113.02   59.86
   2  -2   1 2059.63   59.89
   2  -2   1 2183.93   59.62
  -3   2  -1    3.83    1.63
  -3   2  -1    4.19    2.64
   3  -2   1    0.25    1.47
   3  -2   1    1.99    1.67
  -4   2  -1 7169.97  199.70
  -4   2  -1 7091.36  197.04
   4  -2   1 7141.32  199.83
   4  -2   1 7148.20  197.15
  -5   2  -1 1099.93   32.73
  -5   2  -1 1141.61   32.65
  -5   2  -1 1072.70   38.74
   5  -2   1 1100.77   36.57
  -6   2  -1    9.35    2.38
  -6   2  -1    8.02    4.78
  -6   2  -1    7.68    2.41
  -7   2  -1  320.78   11.64
  -7   2  -1  322.36   17.10
  -7   2  -1  313.74   11.86
  -7   2  -1  300.88   15.85
  -8   2  -1 1005.96   38.07
  -8   2  -1 1071.89   32.52
  -8   2  -1 1090.22   39.55
  -8   2  -1 1053.82   32.15
  -9   2  -1    8.07    2.80
  -9   2  -1    8.59    3.26
  -9   2  -1   11.69    7.56
 -10   2  -1  200.47    9.48
 -10   2  -1  212.61   17.60
 -10   2  -1  204.01    9.93
 -11   2  -1    0.19    2.61
 -11   2  -1   -9.16    6.44
 -12   2  -1  349.39   13.11
 -12   2  -1  393.92   25.27
 -11  -1   1  372.78   25.54
 -11  -1   1  327.81   14.41
 -10  -1   1  350.77   15.63
 -10  -1   1  455.25   25.75
 -10  -1   1  368.43   15.34
  -9  -1   1  132.41    8.71
  -9  -1   1  137.45    8.51
  -9  -1   1  148.20   15.59
  -8  -1   1   79.32    7.02
  -8  -1   1   78.61   11.48
  -8  -1   1   93.33    7.09
  -7  -1   1   26.25    4.19
  -7  -1   1   30.15    8.10
  -7  -1   1   27.04    7.02
   6   1  -1   15.37    3.18
  -6  -1   1   14.00    3.02
  -6  -1   1   10.75    5.04
  -6  -1   1   17.10    6.50
   5   1  -1  112.48    6.25
  -5  -1   1  121.81    9.72
  -5  -1   1  113.47    6.44
  -5  -1   1  118.45   10.60
   4   1  -1 1473.23   43.97
  -4  -1   1 1515.80   48.16
  -4  -1   1 1560.70   44.22
  -4  -1   1 1494.74   47.38
   3   1  -1  525.98   16.61
  -3  -1   1  514.55   18.89
  -3  -1   1  529.67   16.66
   2   1  -1   49.09    4.97
  -2  -1   1   50.55    3.45
  -2  -1   1   48.40    4.84
   1   1  -1  401.46   13.07
   1   1  -1  356.54   11.98
  -1  -1   1  410.16   13.04
  -1  -1   1  404.39   12.21
  -3   1  -1  536.00   17.80
  -3   1  -1  505.16   14.89
   3  -1   1  450.44   17.23
  -4   1  -1   84.56    8.50
  -4   1  -1   89.28    4.72
  -4   1  -1   89.54    4.40
   4  -1   1   93.17    8.61
  -5   1  -1   14.57    2.39
  -5   1  -1   21.30    6.21
  -5   1  -1   14.37    2.64
   5  -1   1   16.87    5.50
  -6   1  -1  232.02   13.79
  -6   1  -1  217.42    8.40
  -6   1  -1  215.30    8.67
  -7   1  -1 1086.28   33.04
  -7   1  -1 1084.98   38.87
  -7   1  -1 1149.63   40.24
  -7   1  -1 1076.54   32.77
  -8   1  -1  427.66   15.39
  -8   1  -1  448.64   21.88
  -8   1  -1  441.10   22.71
  -8   1  -1  440.07   15.12
  -9   1  -1    1.68    2.70
  -9   1  -1    0.99    6.56
  -9   1  -1   -2.72    2.00
 -10   1  -1   17.91    5.14
 -10   1  -1   15.35    8.66
 -10   1  -1   16.48    3.10
 -11   1  -1  179.08   11.42
 -11   1  -1  180.41    8.23
 -11   1  -1  180.44   18.51
 -12   1  -1  124.10   24.82
 -12   0   1    4.20    3.30
 -11   0   1   29.38   16.28
 -11   0   1   13.43    4.03
 -11   0   1   22.94    4.22
 -10   0   1   11.03    3.54
 -10   0   1    6.83    3.69
 -10   0   1   22.83    9.14
  -9   0   1   53.95   11.03
  -9   0   1   51.65    5.69
  -9   0   1   44.34    5.69
  -8   0   1   75.98    6.88
  -8   0   1   64.29   10.40
  -8   0   1   80.96    6.30
  -8   0   1   74.22   11.30
  -7   0   1  323.23   19.10
  -7   0   1  313.83   13.37
  -7   0   1  346.40   13.19
  -7   0   1  344.97   18.83
  -6   0   1  151.14    8.21
  -6   0   1  147.44   11.08
  -6   0   1  174.53    7.97
  -6   0   1  188.38   12.90
  -5   0   1   -1.25    4.78
  -5   0   1   -0.56    2.20
  -5   0   1   -2.81    3.89
   4   0  -1   92.92    5.42
  -4   0   1   84.94    8.23
  -4   0   1   92.55    9.18
  -4   0   1   86.87    5.37
   3   0  -1 1223.46   35.41
  -3   0   1 1261.82   35.55
  -3   0   1 1191.59   37.29
   2   0  -1  471.06   15.72
  -2   0   1  486.26   14.46
  -2   0   1  455.99   15.59
   1   0  -1    4.96    1.26
   1   0  -1    5.20    0.81
  -1   0   1    8.24    1.15
  -1   0  -1  390.48   12.52
  -3   0  -1   29.73    2.19
  -3   0  -1   25.07    4.29
   3   0   1   24.25    4.26
   3   0   1   28.18    2.18
  -4   0  -1  882.01   25.82
   4   0   1  887.90   30.64
  -5   0  -1  183.10    7.10
  -5   0  -1  172.33   11.85
  -5   0  -1  178.80    7.44
  -6   0  -1    1.78    1.69
  -6   0  -1    3.03    2.19
  -6   0  -1    1.07    4.75
  -6   0  -1    4.70    4.21
  -7   0  -1  126.05    6.37
  -7   0  -1  125.93   11.65
  -7   0  -1  118.62   12.56
  -7   0  -1  117.30    6.70
  -8   0  -1  852.82   35.55
  -8   0  -1  868.93   26.88
  -8   0  -1  874.49   27.24
  -9   0  -1  101.38    6.60
  -9   0  -1  118.57   14.47
  -9   0  -1  115.34    6.45
 -10   0  -1  529.16   18.69
 -10   0  -1  525.97   28.63
 -10   0  -1  528.98   17.84
 -11   0  -1   41.98   11.33
 -11   0  -1   23.98    3.19
 -11   0  -1   26.85    4.45
 -12   1   1   79.72   14.29
 -12   1   1   93.78    7.17
 -11   1   1   27.08    9.63
 -11   1   1   26.76    4.80
 -10   1   1   25.67    4.38
 -10   1   1   31.10    9.33
 -10   1   1   27.45    4.95
  -9   1   1  745.63   25.75
  -9   1   1  763.28   25.52
  -9   1   1  756.79   32.69
  -8   1   1  506.34   18.64
  -8   1   1  507.64   18.10
  -8   1   1  504.88   23.24
  -8   1   1  496.48   24.39
  -7   1   1 2359.15   69.70
  -7   1   1 2395.41   74.66
  -7   1   1 2429.36   75.57
  -7   1   1 2461.51   71.88
  -6   1   1   36.10    7.04
  -6   1   1   49.59    6.58
  -6   1   1   39.52    4.65
  -6   1   1   41.66    4.34
  -5   1   1  952.88   32.54
  -5   1   1  996.69   29.73
  -5   1   1  943.65   29.96
  -5   1   1 1008.67   33.63
  -4   1   1  466.38   15.18
  -4   1   1  444.14   17.15
  -4   1   1  464.49   15.55
  -4   1   1  469.82   18.00
  -3   1   1 3950.76  111.91
  -3   1   1 4007.75  112.30
  -1  -1  -1 4025.68  109.13
  -1  -1  -1 3955.19  110.56
   1   1   1 3925.12  110.59
   1   1   1 3921.56  109.08
  -2  -1  -1  709.70   19.88
  -2  -1  -1  685.89   22.53
   2   1   1  639.60   22.31
   2   1   1  680.18   19.82
  -3  -1  -1 2140.10   65.64
   3   1   1 2412.01   69.82
   3   1   1 2493.74   65.81
  -4  -1  -1 1731.49   54.09
  -4  -1  -1 1739.78   49.02
   4   1   1 1682.61   48.85
  -5  -1  -1   16.70    6.09
  -5  -1  -1   23.95    5.64
  -5  -1  -1   24.22    2.98
   5   1   1   24.11    2.83
  -6  -1  -1  431.95   21.11
  -6  -1  -1  432.52   14.79
  -6  -1  -1  437.75   20.34
   6   1   1  446.68   14.80
  -7  -1  -1  178.20    8.65
  -7  -1  -1  195.55   14.12
  -7  -1  -1  184.49   15.22
  -7  -1  -1  198.40    8.57
  -8  -1  -1   45.11    4.77
  -8  -1  -1   44.55    9.79
  -8  -1  -1   37.79    4.23
  -9  -1  -1   29.06    3.91
  -9  -1  -1   30.88    5.23
  -9  -1  -1   21.93    8.79
 -10  -1  -1  139.23    7.25
 -10  -1  -1  139.56   16.94
 -11  -1  -1   69.70    6.02
 -11  -1  -1   80.08   14.17
 -12   2   1    3.74    2.73
 -12   2   1    1.01    3.20
 -12   2   1    5.26    8.72
 -11   2   1    8.80    7.85
 -11   2   1    2.14    3.61
 -11   2   1   10.08    3.44
 -10   2   1  122.37    8.55
 -10   2   1  104.89   13.80
 -10   2   1  115.67    7.92
  -9   2   1 1036.38   33.25
  -9   2   1  996.75   39.57
  -9   2   1 1030.32   32.80
  -8   2   1   94.07   11.67
  -8   2   1  102.23    7.59
  -8   2   1   97.04    6.98
  -7   2   1   46.94    7.36
  -7   2   1   33.66    7.38
  -7   2   1   42.23    5.39
  -7   2   1   45.33    5.07
  -6   2   1  249.81   13.03
  -6   2   1  246.09   10.71
  -6   2   1  249.04   10.38
  -6   2   1  257.03   13.93
  -5   2   1 2532.67   73.06
  -5   2   1 2585.75   72.92
  -5   2   1 2515.29   75.38
  -5   2   1 2551.07   74.88
   4  -2  -1 1923.28   53.89
  -4   2   1 1778.42   54.39
  -4   2   1 1830.65   54.95
  -4   2   1 1883.73   53.74
   3  -2  -1  841.37   25.81
  -3   2   1  837.37   25.72
  -3   2   1  850.39   25.77
  -3   2   1  867.21   26.02
   2  -2  -1  507.82   16.29
  -2   2   1  532.28   16.34
  -2   2   1  491.55   15.18
   1  -2  -1   83.05    4.85
  -1   2   1   77.72    4.71
  -1  -2  -1    3.38    2.49
  -1  -2  -1    3.03    1.75
   1   2   1    6.73    1.88
   1   2   1    3.61    2.50
  -2  -2  -1 9510.70  260.67
  -2  -2  -1 9422.88  263.26
  -3  -2  -1 3497.99  100.31
  -3  -2  -1 3498.25   96.94
   3   2   1 3391.28   96.83
  -4  -2  -1  166.39   11.08
  -4  -2  -1  167.52   11.93
  -4  -2  -1  176.37    7.56
   4   2   1  177.63    7.41
  -5  -2  -1  974.83   34.92
  -5  -2  -1  929.70   28.71
  -5  -2  -1  925.16   33.77
   5   2   1  945.43   28.66
  -6  -2  -1   90.87   11.56
  -6  -2  -1   63.89    5.31
  -6  -2  -1   67.84    9.25
   6   2   1   68.44    5.11
  -7  -2  -1    1.19    6.69
  -7  -2  -1   -2.06    2.44
   7   2   1    3.52    2.72
  -8  -2  -1   -1.43    2.46
  -8  -2  -1   -2.18    2.67
  -8  -2  -1    5.45    7.08
  -9  -2  -1   69.46   12.70
  -9  -2  -1   64.02    5.70
 -10  -2  -1    9.39    8.82
 -10  -2  -1    4.80    3.16
 -10  -2  -1    5.25    3.70
 -13   3   1  -13.06    6.87
 -13   3   1    2.74    2.65
 -12   3   1   20.19    4.05
 -12   3   1   18.45    9.32
 -12   3   1   10.05    3.96
 -11   3   1  155.57    9.68
 -11   3   1  147.97    9.31
 -11   3   1  162.56   16.06
 -10   3   1  169.82    9.67
 -10   3   1  163.07   10.05
 -10   3   1  164.35   15.09
  -9   3   1  816.11   33.10
  -9   3   1  813.06   32.14
  -9   3   1  853.59   28.17
  -9   3   1  810.26   27.52
  -8   3   1 1249.16   39.30
  -8   3   1 1232.97   42.73
  -8   3   1 1243.81   38.91
  -8   3   1 1274.79   43.72
  -7   3   1   85.15    6.82
  -7   3   1   88.27    8.52
  -7   3   1   88.53    9.59
  -7   3   1   95.21    6.64
   6  -3  -1 2038.64   59.04
  -6   3   1 1976.43   60.34
  -6   3   1 1965.81   60.85
   5  -3  -1 2398.63   68.41
  -5   3   1 2345.20   68.92
  -5   3   1 2376.43   68.24
  -5   3   1 2299.11   69.25
   4  -3  -1 2656.28   74.92
  -4   3   1 2671.50   74.78
  -4   3   1 2546.35   74.36
  -4   3   1 2552.38   74.65
  -3   3   1 5776.96  159.64
   2  -3  -1   63.38    4.75
  -2   3   1   52.33    4.48
   1  -3  -1 2699.41   75.43
  -1   3   1 2620.59   75.31
   0  -3  -1 1252.97   36.97
   0  -3  -1 1296.97   37.48
   0  -3  -1 1288.49   37.19
   0   3   1 1247.14   37.29
  -1  -3  -1 1386.61   41.43
  -2  -3  -1 2789.91   84.30
  -2  -3  -1 2881.12   84.00
  -2  -3  -1 2944.63   81.99
   2   3   1 2951.30   81.98
  -3  -3  -1  201.83   11.81
  -3  -3  -1  212.47   12.63
  -3  -3  -1  222.05    9.23
   3   3   1  214.26    8.97
  -4  -3  -1 1501.08   49.06
  -4  -3  -1 1499.62   44.87
  -4  -3  -1 1586.95   50.30
   4   3   1 1503.11   44.89
  -5  -3  -1  920.25   34.56
  -5  -3  -1  879.11   33.35
  -5  -3  -1  913.62   28.52
   5   3   1  913.74   28.36
  -6  -3  -1   65.16    5.90
  -6  -3  -1   52.58    8.49
  -6  -3  -1   67.30   10.79
  -7  -3  -1   17.13    3.71
  -7  -3  -1   22.98    8.27
   7   3   1   16.96    3.47
  -8  -3  -1  170.18   16.81
  -8  -3  -1  163.19    8.96
   8   3   1  175.00    8.82
  -9  -3  -1   23.76    4.06
  -9  -3  -1   15.85    3.64
  -9  -3  -1   20.93    9.34
 -10  -3  -1   -4.46    2.72
 -10  -3  -1    4.26    8.83
 -13   4   1    7.39    8.83
 -13   4   1   11.05    3.46
 -12   4   1   -4.65    6.73
 -12   4   1    1.10    2.89
 -12   4   1   -1.39    3.55
 -11   4   1  101.69    8.42
 -11   4   1  106.07   13.85
 -11   4   1  103.91    8.18
 -10   4   1    5.90    3.60
 -10   4   1    4.26    3.78
  -9   4   1  827.63   33.93
  -9   4   1  838.20   32.75
  -9   4   1  828.22   28.21
  -9   4   1  837.88   28.64
  -8   4   1  214.25   10.93
  -8   4   1  221.72   11.12
  -8   4   1  231.01   14.36
  -8   4   1  208.91   13.03
   7  -4  -1  996.12   33.99
  -7   4   1 1104.36   36.18
  -7   4   1 1071.73   34.04
  -7   4   1 1077.98   35.59
   6  -4  -1 5311.43  147.40
  -6   4   1 5162.76  147.91
  -6   4   1 5150.08  147.60
  -6   4   1 5222.16  147.11
   5  -4  -1 2899.06   95.88
  -5   4   1 3320.22   94.06
  -5   4   1 3476.56   94.94
  -5   4   1 3496.38   94.48
   4  -4  -1 1746.33   51.38
  -4   4   1 1724.09   49.73
  -4   4   1 1713.01   49.60
  -4   4   1 1709.07   51.19
   3  -4  -1  443.01   15.95
  -3   4   1  420.43   15.66
   2  -4  -1 1083.36   33.60
  -2   4   1 1110.28   33.62
   1  -4  -1 1046.33   31.74
   1  -4  -1  979.71   29.59
   1  -4  -1 1042.11   29.61
  -1   4   1 1042.15   31.64
   0  -4  -1  671.33   21.88
   0  -4  -1  708.19   22.26
   0  -4  -1  699.46   22.62
   0   4   1  676.83   22.38
  -1  -4  -1 2033.00   61.08
  -1  -4  -1 2141.56   61.95
  -1  -4  -1 2143.97   62.35
  -2  -4  -1  732.53   24.51
  -2  -4  -1  774.39   26.46
   2   4   1  778.38   24.68
  -3  -4  -1  102.89    6.71
  -3  -4  -1   93.66    8.66
  -3  -4  -1  109.70    9.72
   3   4   1   89.41    6.15
  -4  -4  -1   45.92    8.00
  -4  -4  -1   50.26    7.82
   4   4   1   45.48    5.00
  -5  -4  -1   22.19    6.65
  -5  -4  -1   24.73    4.36
  -5  -4  -1   20.28    7.55
   5   4   1   27.35    4.09
  -6  -4  -1  101.40    7.53
  -6  -4  -1  103.45   13.06
   6   4   1  115.25    7.29
  -7  -4  -1   20.50    8.46
  -7  -4  -1   13.04    4.04
   7   4   1   16.65    3.65
  -8  -4  -1   77.87    6.89
  -8  -4  -1   80.97   12.75
   8   4   1   68.53    6.03
  -9  -4  -1  173.43   18.91
  -9  -4  -1  162.00    9.19
 -13   5   1  175.42   20.29
 -13   5   1  217.49   11.57
 -12   5   1   96.71    8.25
 -12   5   1  104.97   13.22
 -12   5   1   95.66    8.47
 -11   5   1  190.51   15.45
 -11   5   1  187.96   11.52
 -11   5   1  180.65   11.04
 -10   5   1    6.89    4.08
 -10   5   1    6.53    3.61
 -10   5   1    3.54    5.04
 -10   5   1   -0.28    5.85
  -9   5   1   25.35    5.17
  -9   5   1   27.37    5.26
  -9   5   1   14.12    5.47
  -9   5   1   19.18    6.71
   8  -5  -1 2379.37   70.92
  -8   5   1 2272.13   72.06
  -8   5   1 2457.28   70.82
  -8   5   1 2342.70   71.84
   7  -5  -1  216.87   11.61
  -7   5   1  221.19   12.11
  -7   5   1  225.18   11.69
  -7   5   1  222.81   11.28
   6  -5  -1 3324.58   96.04
  -6   5   1 3362.49   95.14
  -6   5   1 3224.13   94.82
  -6   5   1 3325.29   95.75
   5  -5  -1 2033.61   61.49
  -5   5   1 2105.25   59.54
  -5   5   1 2061.54   61.34
  -5   5   1 2050.04   59.43
   4  -5  -1  431.02   16.81
  -4   5   1  429.94   16.51
   3  -5  -1  172.02    9.80
  -3   5   1  167.86    9.49
   2  -5  -1  218.77   12.21
  -2   5   1  238.41   10.96
   1  -5  -1 1597.14   45.78
   1  -5  -1 1587.21   45.92
  -1   5   1 1607.20   48.00
   0  -5  -1  968.06   30.67
   0  -5  -1  979.91   32.86
   0  -5  -1  984.57   30.50
   0   5   1  988.09   31.16
  -1  -5  -1 1073.77   34.49
  -1  -5  -1 1089.85   35.02
  -1  -5  -1 1063.03   34.09
   1   5   1 1118.45   34.17
  -2  -5  -1  501.24   18.59
  -2  -5  -1  529.85   20.84
  -3  -5  -1    6.75    5.22
  -3  -5  -1    5.94    3.37
  -3  -5  -1    7.38    4.69
   3   5   1    4.72    2.95
  -4  -5  -1   33.94    6.92
  -4  -5  -1   29.84    7.81
  -4  -5  -1   32.52    5.11
   4   5   1   30.27    4.73
  -5  -5  -1  135.98   13.34
  -5  -5  -1  131.96    8.81
  -5  -5  -1  114.40   11.88
   5   5   1  120.18    8.02
  -6  -5  -1  831.81   27.91
  -6  -5  -1  830.60   34.97
   6   5   1  782.79   27.19
  -7  -5  -1  126.22    9.05
  -7  -5  -1  132.15   15.56
   7   5   1  141.56    8.40
  -8  -5  -1  262.24   13.04
  -8  -5  -1  268.15   33.67
   8   5   1  279.35   12.39
  -9  -5  -1   41.49    5.54
 -14   6   1   -5.55    7.56
 -14   6   1   16.06    3.62
 -13   6   1  241.35   13.29
 -13   6   1  263.56   19.38
 -12   6   1  220.06   17.15
 -12   6   1  247.50   13.23
 -11   6   1    4.51    5.86
 -11   6   1    2.55    3.47
 -11   6   1    4.20    4.05
 -10   6   1  123.00   11.20
 -10   6   1  131.47   12.30
 -10   6   1  132.17   10.00
 -10   6   1  136.99   10.03
   9  -6  -1   76.70    8.97
  -9   6   1   83.18    8.37
  -9   6   1  100.27    9.51
  -9   6   1   89.70   10.06
   8  -6  -1 2984.94   89.33
  -8   6   1 2949.18   88.78
  -8   6   1 3019.41   88.96
  -8   6   1 3103.84   89.30
   7  -6  -1    3.09    4.07
  -7   6   1    2.46    3.51
  -7   6   1    3.27    3.98
  -7   6   1    1.63    3.87
   6  -6  -1  273.09   13.18
  -6   6   1  269.40   11.22
  -6   6   1  281.70   12.98
  -6   6   1  260.10   10.98
   5  -6  -1  247.57   12.19
  -5   6   1  227.48   11.53
   4  -6  -1   37.59    5.70
  -4   6   1   27.05    4.62
   3  -6  -1  472.60   17.84
  -3   6   1  426.04   17.20
   2  -6  -1 1284.04   40.04
  -2   6   1 1251.75   39.81
   1  -6  -1  350.69   12.97
   1  -6  -1  378.87   12.93
   1  -6  -1  371.87   15.39
  -1   6   1  368.29   15.01
   0  -6  -1  124.12    8.39
   0  -6  -1  122.33    7.85
   0   6   1  113.83    8.05
  -1  -6  -1 1184.40   38.73
  -1  -6  -1 1203.93   41.70
  -1  -6  -1 1250.20   38.87
   1   6   1 1239.26   38.65
  -2  -6  -1  405.37   18.38
  -2  -6  -1  421.13   16.65
  -2  -6  -1  387.60   17.49
  -3  -6  -1    2.08    3.69
  -3  -6  -1   -1.27    4.20
  -3  -6  -1    2.65    5.20
   3   6   1    1.59    3.20
  -4  -6  -1  229.52   14.89
  -4  -6  -1  221.17   12.00
  -4  -6  -1  240.41   15.94
   4   6   1  223.85   11.49
  -5  -6  -1    8.99    4.35
  -5  -6  -1    8.37    7.25
   5   6   1    6.43    3.58
  -6  -6  -1   69.00    7.55
  -6  -6  -1   67.96   11.68
   6   6   1   78.66    6.65
  -7  -6  -1  389.89   23.80
  -7  -6  -1  315.46   15.37
   7   6   1  355.82   15.07
  -8  -6  -1   28.15    5.40
  -8  -6  -1   33.74   11.11
 -14   7   1   72.17    7.54
 -13   7   1  141.23   10.45
 -13   7   1  131.88   14.67
 -12   7   1   56.07   10.20
 -12   7   1   65.06    7.96
 -11   7   1  323.55   17.35
 -11   7   1  308.97   16.07
 -11   7   1  337.99   18.50
  10  -7  -1  483.84   21.32
 -10   7   1  466.42   20.37
 -10   7   1  494.42   21.75
 -10   7   1  480.60   21.30
   9  -7  -1   53.99    7.96
  -9   7   1   52.36    7.32
  -9   7   1   51.83    7.57
  -9   7   1   50.87    7.14
   8  -7  -1  371.73   17.50
  -8   7   1  390.82   22.41
  -8   7   1  351.66   18.42
  -8   7   1  364.71   15.72
   7  -7  -1 1088.18   36.67
  -7   7   1 1055.05   33.54
  -7   7   1 1100.25   33.49
  -7   7   1 1051.04   36.01
   6  -7  -1 1621.38   51.25
  -6   7   1 1617.03   46.85
  -6   7   1 1627.91   50.99
   5  -7  -1   78.29    8.01
  -5   7   1   93.35    7.77
   4  -7  -1   64.75    7.28
  -4   7   1   71.14    7.02
   3  -7  -1  111.56    8.85
  -3   7   1  114.34    8.44
   2  -7  -1  298.86   14.08
  -2   7   1  296.09   13.69
   1  -7  -1  149.16    7.44
   1  -7  -1  174.48   10.45
   1  -7  -1  147.18    7.84
  -1   7   1  155.63    9.67
   0  -7  -1  267.85   13.12
   0  -7  -1  244.54   11.84
   0  -7  -1  251.47   11.46
   0   7   1  244.46   12.56
  -1  -7  -1  610.30   22.98
  -1  -7  -1  584.74   22.17
  -1  -7  -1  580.23   22.47
   1   7   1  594.90   22.32
  -2  -7  -1   91.40    9.26
  -2  -7  -1  112.69   10.61
  -2  -7  -1   90.26    8.77
   2   7   1   93.89    7.84
  -3  -7  -1   64.81    7.49
  -3  -7  -1   65.70    4.42
  -3  -7  -1   56.62    8.95
   3   7   1   57.48    6.67
  -4  -7  -1  243.26   13.38
  -4  -7  -1  260.87   19.46
  -4  -7  -1  251.47   18.38
   4   7   1  250.51   12.83
  -5  -7  -1  144.57   14.70
  -5  -7  -1  133.19   10.30
   5   7   1  126.43    9.32
  -6  -7  -1  267.19   14.30
  -6  -7  -1  254.89   19.55
   6   7   1  277.19   13.21
  -7  -7  -1   -2.10    4.16
  -7  -7  -1    0.62    7.80
  -8  -7  -1    9.67    4.95
 -14   8   1   99.04    9.73
 -14   8   1   86.84   12.54
 -13   8   1  100.21    9.53
 -13   8   1   84.21   11.61
 -12   8   1  208.30   15.01
 -12   8   1  198.02   13.10
  11  -8  -1  112.25   11.23
 -11   8   1  117.90   10.25
 -11   8   1  105.42   10.98
  10  -8  -1  980.55   36.12
 -10   8   1 1018.41   34.86
 -10   8   1  989.55   34.79
   9  -8  -1   11.83    5.88
  -9   8   1   15.97    4.82
  -9   8   1   16.26    5.34
  -9   8   1   14.88    5.19
   8  -8  -1  237.71   14.26
  -8   8   1  215.06   10.85
  -8   8   1  225.19   13.33
  -8   8   1  226.79   10.79
   7  -8  -1  984.19   34.97
  -7   8   1  989.11   34.46
  -7   8   1  984.73   29.65
   6  -8  -1    7.56    4.98
  -6   8   1   20.11    5.57
   5  -8  -1 2590.50   78.19
  -5   8   1 2575.31   78.28
   4  -8  -1  312.36   15.31
  -4   8   1  296.52   14.75
   3  -8  -1  943.27   32.81
  -3   8   1  934.47   32.44
   2  -8  -1    8.75    4.96
  -2   8   1   17.87    4.96
   1  -8  -1  831.86   29.61
   1  -8  -1  805.36   26.39
   1  -8  -1  800.19   25.98
  -1   8   1  845.34   29.39
   0  -8  -1  921.32   32.72
   0  -8  -1  968.28   32.42
   0   8   1  903.60   32.77
  -1  -8  -1  495.69   20.93
  -1  -8  -1  508.62   21.02
  -1  -8  -1  499.06   20.25
   1   8   1  513.23   23.20
  -2  -8  -1   82.52    9.19
  -2  -8  -1   85.00   10.28
  -2  -8  -1  100.16    9.50
   2   8   1   77.47    8.36
  -3  -8  -1   64.03    8.20
  -3  -8  -1   75.84   10.40
  -3  -8  -1   86.72    9.50
   3   8   1   67.34    7.45
  -4  -8  -1   37.09    6.47
  -4  -8  -1   20.51    7.93
   4   8   1   28.89    5.13
  -5  -8  -1  205.73   17.12
  -6  -8  -1   75.14    8.80
  -6  -8  -1   71.49   12.64
  -7  -8  -1   19.22    5.51
  -7  -8  -1   23.29   10.38
 -13   9   1  137.52   12.97
 -13   9   1  130.69   11.75
  12  -9  -1  193.45   14.21
 -12   9   1  158.49   12.68
  11  -9  -1    6.59    5.39
 -11   9   1    9.96    5.58
 -11   9   1   23.22    4.71
  10  -9  -1   42.03    7.80
 -10   9   1   48.83    6.33
 -10   9   1   46.28    6.91
   9  -9  -1   65.96    9.00
  -9   9   1   63.39    6.64
  -9   9   1   68.48    6.98
   8  -9  -1  158.49   12.24
   7  -9  -1   15.57    6.06
   6  -9  -1 1326.31   45.03
  -6   9   1 1338.92   44.65
   5  -9  -1  250.38   14.40
  -5   9   1  217.03   13.30
   4  -9  -1   46.13    7.16
  -4   9   1   60.20    8.11
   3  -9  -1 1210.32   40.83
  -3   9   1 1176.54   40.32
   2  -9  -1   71.77    8.46
  -2   9   1   86.22    8.91
   1  -9  -1   31.38    6.85
   1  -9  -1   37.05    4.86
   1  -9  -1   38.67    5.29
  -1   9   1   26.54    6.24
   0  -9  -1  321.44   14.24
   0  -9  -1  326.51   16.85
   0  -9  -1  335.74   15.07
   0   9   1  292.02   15.71
  -1  -9  -1  253.14   13.67
  -1  -9  -1  267.80   14.70
  -1  -9  -1  267.85   15.11
   1   9   1  221.80   17.75
  -2  -9  -1  262.12   16.04
  -2  -9  -1  292.79   17.67
  -3  -9  -1  105.44   10.84
  -3  -9  -1  103.10   12.17
  -4  -9  -1    0.14    4.73
  -4  -9  -1    4.81    6.83
  -5  -9  -1   59.22   11.18
  -5  -9  -1   61.04    8.42
  -6  -9  -1   50.14   11.15
  -6  -9  -1   48.46    7.72
 -13  10   1  145.80   14.56
  12 -10  -1   13.91    6.47
 -12  10   1   15.96    5.84
  11 -10  -1   -0.11    4.92
 -11  10   1   -1.59    4.04
  10 -10  -1  101.00   11.73
 -10  10   1   73.31    7.12
   9 -10  -1  288.13   16.92
   8 -10  -1  291.73   17.16
   7 -10  -1  344.63   18.48
   6 -10  -1   46.44    7.93
   5 -10  -1   59.31    9.29
   4 -10  -1   12.90    5.83
   3 -10  -1  202.87   13.89
   2 -10  -1   11.26    5.31
   1 -10  -1  694.31   23.67
   1 -10  -1  681.44   28.03
   1 -10  -1  749.65   24.38
   0 -10  -1  808.23   28.59
   0 -10  -1  880.09   29.62
   0 -10  -1  817.91   31.80
  -1 -10  -1  138.70   12.17
  -1 -10  -1  143.74   10.15
  -1 -10  -1  157.03   11.95
  -2 -10  -1  102.90   10.94
  -2 -10  -1   89.89   11.10
  -3 -10  -1  180.35   13.69
  -3 -10  -1  178.05   14.87
  -4 -10  -1   30.64    8.78
  -4 -10  -1   29.71    7.30
  -5 -10  -1   42.72   10.65
  -5 -10  -1   72.90    9.31
  13 -11  -1   25.85    7.63
  12 -11  -1  217.83   27.90
 -12  11   1  140.06    9.81
  11 -11  -1   27.75    7.61
  10 -11  -1   11.54    6.67
   9 -11  -1   31.91    8.06
   8 -11  -1   -3.20    4.84
   7 -11  -1   15.15    6.61
   6 -11  -1  164.93   13.42
   5 -11  -1   52.98    9.21
   4 -11  -1   24.82    7.14
   3 -11  -1   64.01    9.62
   2 -11  -1  229.38   15.28
   1 -11  -1  197.18   14.63
   1 -11  -1  233.08   15.89
   0 -11  -1  358.48   15.35
   0 -11  -1  355.98   19.25
   0 -11  -1  347.14   16.20
  -1 -11  -1   20.66    7.04
  -1 -11  -1   18.93    6.16
  -2 -11  -1   82.00   10.55
  -2 -11  -1   91.72   10.91
  -3 -11  -1  116.60   13.42
  -3 -11  -1   98.35   11.29
  -4 -11  -1   30.44    9.31
  -4 -11  -1   37.38    8.19
  12 -12  -1   20.94    6.98
  11 -12  -1  832.60   35.19
  10 -12  -1   22.24    9.20
   9 -12  -1    2.95    6.21
   8 -12  -1   72.40   10.85
   7 -12  -1   58.42    9.78
   6 -12  -1    6.74    6.27
   5 -12  -1   45.61    8.92
   4 -12  -1  157.86   13.86
   3 -12  -1   -4.24    5.60
   2 -12  -1  214.94   15.78
   1 -12  -1   16.10    6.64
   0 -12  -1  212.92   16.19
   0 -12  -1  206.18   12.29
  -1 -12  -1  394.87   19.31
  -1 -12  -1  405.79   21.93
  -2 -12  -1 1019.13   42.51
  -2 -12  -1 1029.30   38.39
  -3 -12  -1   76.95   11.44
  -3 -12  -1   87.84   11.19
  11 -13  -1  164.32   21.41
  10 -13  -1  367.12   21.86
   9 -13  -1   13.48    7.84
   8 -13  -1  225.66   16.96
   7 -13  -1  172.63   20.10
   6 -13  -1   28.08   12.43
   5 -13  -1    1.77    6.83
   4 -13  -1  270.96   21.11
   2 -13  -1   68.14   11.24
   1 -13  -1    2.65    6.54
   0 -13  -1   26.94    5.82
   0 -13  -1   48.62    9.96
  -1 -13  -1    7.50    6.85
   7 -14  -1  191.02   17.44
   6 -14  -1   25.72    8.56
   5 -14  -1   68.77   12.09
   4 -14  -1  130.03   14.79
   3 -14  -1   21.72    9.21
   0 -14   2   65.19   10.30
   1 -14   2   49.04   13.10
   2 -14   2   16.31    7.78
   3 -14   2   27.97    9.22
   4 -14   2  379.39   22.33
   5 -14   2   59.38   11.68
   6 -14   2   14.59    7.78
   7 -14   2   39.97    9.16
   8 -14   2    4.44    6.73
   9 -14   2   25.12    8.68
  10 -14   2    7.70    7.89
  -2 -13   2  113.98   12.69
  -2 -13   2  125.31   20.41
  -1 -13   2  111.41   13.53
  -1 -13   2   92.29   10.76
   0 -13   2    8.48    5.62
   0 -13   2    9.77    7.59
   1 -13   2   -2.14    3.93
   2 -13   2   27.27    8.41
   3 -13   2   98.48   12.65
   4 -13   2   78.16   11.38
   5 -13   2  166.07   14.93
   6 -13   2   95.35   12.67
   7 -13   2  494.61   25.01
   8 -13   2  130.40   14.00
   9 -13   2    5.01    6.90
  10 -13   2   17.34    7.35
  11 -13   2  111.49   13.24
  12 -13   2  132.74   14.22
  -3 -12   2   69.16   11.09
  -3 -12   2   61.55   10.10
  -2 -12   2    4.85    5.92
  -1 -12   2  570.63   27.26
  -1 -12   2  649.54   23.73
  -1 -12   2  579.89   25.46
   0 -12   2   40.29    7.26
   0 -12   2   30.96    8.42
   1 -12   2   82.07    8.52
   1 -12   2  122.46    7.82
   1 -12   2   96.21   11.94
   2 -12   2   13.62    6.81
   2 -12   2   26.05    4.14
   2 -12   2   25.17    4.63
   3 -12   2  146.92   13.42
   4 -12   2    8.73    6.24
   5 -12   2  522.69   24.72
   6 -12   2  327.14   18.87
   7 -12   2    5.31    5.85
   8 -12   2    8.61    6.16
   9 -12   2   78.06   10.34
  10 -12   2   11.74    6.55
 -11  12  -2   15.39    3.98
  11 -12   2    1.66    5.55
  12 -12   2  185.32   24.07
  -5 -11   2  -10.22    6.64
  -5 -11   2    6.27    6.52
  -4 -11   2  171.92   16.41
  -4 -11   2  196.03   15.49
  -3 -11   2   34.30    9.07
  -3 -11   2   28.93    8.15
  -2 -11   2   47.29    9.17
  -2 -11   2   45.70    8.76
  -1 -11   2   66.19    9.39
  -1 -11   2   66.72    9.99
   0 -11   2  461.53   22.13
   0 -11   2  442.42   19.64
   0 -11   2  427.79   18.32
   1 -11   2  300.45   14.34
   1 -11   2  287.59   13.04
   1 -11   2  285.63   17.28
   2 -11   2    2.32    3.67
   2 -11   2   -0.24    5.59
   2 -11   2    1.22    2.91
   3 -11   2   27.52    7.38
   4 -11   2  939.43   35.19
   5 -11   2  234.49   15.29
   6 -11   2   24.42    6.98
   7 -11   2  958.01   36.01
   8 -11   2    1.27    5.23
  -9  11  -2   37.30    4.97
  -9  11  -2   38.90    5.05
   9 -11   2   30.34    7.26
 -10  11  -2   17.89    3.90
 -10  11  -2   11.69    4.44
  10 -11   2    0.47    5.13
 -11  11  -2    0.50    4.45
  11 -11   2    3.83    5.79
 -12  11  -2   -3.59    4.42
  12 -11   2    6.85    5.79
 -13  11  -2   -2.91    5.87
  13 -11   2    2.52    5.86
  -6 -10   2   60.00   12.04
  -6 -10   2   56.52    9.03
  -5 -10   2   24.22    8.93
  -5 -10   2   26.71    7.49
  -4 -10   2   21.21    8.43
  -4 -10   2   18.16    7.15
  -3 -10   2  490.88   22.88
  -3 -10   2  504.56   24.68
  -2 -10   2  124.91   11.67
  -2 -10   2  130.23   12.60
  -2 -10   2  127.86   10.49
  -1 -10   2   -5.04    4.89
  -1 -10   2    1.71    5.41
  -1 -10   2    6.29    4.22
   0 -10   2   57.82    7.27
   0 -10   2   46.05    7.50
   0 -10   2   58.42    8.55
   1 -10   2   19.55    6.65
   1 -10   2   20.01    5.42
   1 -10   2   22.60    4.61
   2 -10   2  108.68   11.46
   2 -10   2  108.24    7.72
   2 -10   2  102.41    7.08
   4 -10   2  402.97   20.95
   5 -10   2   99.58   12.69
   7 -10   2  398.69   20.08
  -8  10  -2    9.30    3.67
  -8  10  -2    8.87    4.04
   8 -10   2   12.96    5.80
  -9  10  -2   50.28    6.71
  -9  10  -2   47.02    6.30
   9 -10   2   56.18    8.73
 -10  10  -2    9.62    4.36
 -10  10  -2    2.99    4.78
  10 -10   2   10.10    5.73
 -11  10  -2    3.38    5.36
  11 -10   2    7.17    5.03
 -12  10  -2   47.87    9.39
  12 -10   2   49.86    8.27
 -13  10  -2    3.23    6.14
  -7  -9   2   56.16    9.13
  -6  -9   2    3.97    5.29
  -6  -9   2   -4.30    6.91
  -5  -9   2  122.76   15.01
  -5  -9   2  123.67   11.68
  -4  -9   2   14.21    7.45
  -4  -9   2   20.33    6.46
  -3  -9   2    7.58    7.25
  -3  -9   2    8.40    5.61
  -2  -9   2   20.24    6.24
  -2  -9   2    9.59    5.74
  -2  -9   2   18.73    6.67
   1   9  -2   -3.44    3.85
  -1  -9   2   -1.85    5.09
  -1  -9   2    1.50    5.12
  -1  -9   2   -2.29    3.86
   0   9  -2   15.90    4.82
   0  -9   2   13.88    5.63
   0  -9   2   10.30    4.51
   0  -9   2   13.25    5.33
  -1   9  -2   15.77    4.89
   1  -9   2   12.82    4.07
   1  -9   2    5.01    5.38
  -2   9  -2 1733.10   50.00
  -2   9  -2 1654.02   53.20
   2  -9   2 1645.76   49.27
   2  -9   2 1668.31   53.68
  -3   9  -2  259.50   10.52
  -3   9  -2  274.35   14.22
   3  -9   2  257.12   14.56
   3  -9   2  270.96   10.14
  -4   9  -2   53.89    7.17
   4  -9   2   62.28    8.25
  -5   9  -2    1.19    4.09
   5  -9   2   20.02    5.95
  -6   9  -2   -0.21    3.12
  -6   9  -2   -4.19    3.65
   6  -9   2    1.90    4.76
   6  -9   2   -0.69    2.86
  -7   9  -2  544.96   22.25
  -7   9  -2  565.81   19.58
   7  -9   2  543.35   22.86
  -8   9  -2    0.26    3.72
  -8   9  -2    2.31    4.43
   8  -9   2   -0.22    4.66
  -9   9  -2  125.69   10.02
  -9   9  -2  116.66    9.29
  -9   9  -2  114.27    9.75
   9  -9   2  112.76   10.69
 -10   9  -2  197.22   12.85
 -10   9  -2  191.37   12.26
  10  -9   2  212.75   18.77
 -11   9  -2   24.29    7.04
  11  -9   2   25.02    6.30
 -12   9  -2  752.71   30.52
  12  -9   2  735.23   29.01
 -13   9  -2    8.89    4.17
 -13   9  -2    3.79    6.97
  -8  -8   2  192.42   13.45
  -7  -8   2    8.76    5.21
  -7  -8   2    4.92    8.12
  -6  -8   2   59.92   11.66
  -6  -8   2   59.67    8.46
  -5  -8   2   20.55    6.27
  -5  -8   2   16.12    7.88
  -4  -8   2    8.51    6.87
   3   8  -2   89.77    8.51
  -3  -8   2   92.31   11.68
  -3  -8   2   80.38    9.40
  -3  -8   2   83.69    9.06
   2   8  -2  361.95   16.73
  -2  -8   2  362.09   17.53
  -2  -8   2  385.12   19.19
  -2  -8   2  355.71   17.44
   1   8  -2  551.93   24.55
  -1  -8   2  541.03   21.64
  -1  -8   2  572.31   23.08
  -1  -8   2  577.40   22.70
   0   8  -2  187.99   11.46
   0  -8   2  193.99   10.63
   0  -8   2  200.30   12.27
  -1   8  -2  155.36    9.91
  -1   8  -2  152.62    9.05
   1  -8   2  151.93    8.55
   1  -8   2  156.50   10.81
  -2   8  -2   39.49    4.68
  -2   8  -2   51.04    6.54
   2  -8   2   42.50    4.94
   2  -8   2   41.81    6.45
  -3   8  -2  361.70   15.76
  -3   8  -2  335.50   12.45
   3  -8   2  361.45   16.22
   3  -8   2  355.17   12.23
  -4   8  -2  768.49   23.84
  -4   8  -2  787.47   27.46
   4  -8   2  782.51   27.90
   4  -8   2  771.86   23.75
  -5   8  -2  351.04   15.37
  -5   8  -2  332.08   12.44
   5  -8   2  335.06   12.53
   5  -8   2  337.24   15.89
  -6   8  -2    7.14    3.86
  -6   8  -2    3.75    3.90
   6  -8   2    6.68    3.47
   6  -8   2    6.00    4.64
  -7   8  -2  890.97   31.34
  -7   8  -2  904.58   29.74
   7  -8   2  947.99   32.27
   7  -8   2  889.66   30.30
  -8   8  -2   18.01    5.46
  -8   8  -2   15.08    4.77
   8  -8   2   18.23    5.57
  -9   8  -2  680.42   25.46
  -9   8  -2  613.71   30.80
   9  -8   2  666.81   25.70
 -10   8  -2   22.71    6.15
 -10   8  -2   23.91    6.97
 -10   8  -2   31.07    5.64
  10  -8   2   25.15    5.95
 -11   8  -2  236.34   12.88
  11  -8   2  241.84   13.97
 -12   8  -2   99.98    8.97
 -12   8  -2  107.95    8.57
 -12   8  -2   97.44   11.89
 -13   8  -2  198.23   16.84
 -13   8  -2  225.84   12.24
  -8  -7   2   32.53   10.32
  -8  -7   2   38.63    6.73
  -7  -7   2  964.04   41.75
  -7  -7   2  931.76   33.94
  -6  -7   2   80.32   12.33
   5   7  -2  109.57    8.81
  -5  -7   2  115.18   10.13
  -5  -7   2  107.11   13.43
   4   7  -2   53.86    6.73
  -4  -7   2   59.81    7.49
  -4  -7   2   60.84    8.97
  -4  -7   2   55.86    9.84
   3   7  -2  109.24    8.64
  -3  -7   2  101.10   11.75
  -3  -7   2  121.54    9.76
  -3  -7   2   96.76   10.25
   2   7  -2  208.92   11.81
  -2  -7   2  233.28   14.27
  -2  -7   2  239.75   13.00
   1   7  -2  656.95   23.89
  -1  -7   2  674.36   24.33
  -1  -7   2  636.92   23.74
   0   7  -2  415.19   16.78
   0   7  -2  441.28   17.46
   0  -7   2  415.44   16.31
   0  -7   2  428.79   17.66
  -1   7  -2    4.58    3.19
  -1   7  -2    9.42    3.45
   1  -7   2    5.30    3.01
   1  -7   2   10.50    4.10
  -2   7  -2 1014.03   30.45
  -2   7  -2  967.40   32.61
   2  -7   2  974.11   32.90
   2  -7   2 1018.74   30.17
  -3   7  -2    6.20    3.32
  -3   7  -2   10.93    2.87
   3  -7   2    6.81    2.64
   3  -7   2   11.32    4.45
  -4   7  -2  303.97   11.24
  -4   7  -2  310.75   13.52
   4  -7   2  300.94   13.88
   4  -7   2  296.14   11.18
  -5   7  -2 1121.69   35.69
  -5   7  -2 1086.51   33.45
   5  -7   2 1099.52   36.02
   5  -7   2 1096.07   33.77
  -6   7  -2   42.54    5.48
  -6   7  -2   33.73    5.04
   6  -7   2   40.25    5.49
   6  -7   2   23.57    5.12
  -7   7  -2   18.69    4.57
  -7   7  -2   23.02    5.43
   7  -7   2   22.51    5.47
   7  -7   2   20.24    5.05
  -8   7  -2  975.24   32.63
  -8   7  -2  962.31   33.36
   8  -7   2  974.86   33.02
  -9   7  -2 1695.84   54.12
  -9   7  -2 1658.20   52.05
   9  -7   2 1670.01   52.59
 -10   7  -2   12.07    6.65
 -10   7  -2    9.07    5.08
 -10   7  -2   13.17    4.26
  10  -7   2   14.22    5.09
 -11   7  -2   61.66   10.01
 -11   7  -2   38.17    6.03
 -11   7  -2   58.00    6.61
 -12   7  -2  170.49   15.13
 -12   7  -2  159.84   15.08
 -12   7  -2  164.02    9.93
 -13   7  -2  105.87    7.44
 -13   7  -2   89.88   13.58
  -9  -6   2   50.15    6.83
  -8  -6   2   22.06   10.12
  -8  -6   2   13.09    4.96
   7   6  -2   42.10    5.61
  -7  -6   2   29.07    5.90
  -7  -6   2   29.74    9.97
   6   6  -2   18.65    4.52
  -6  -6   2   26.53    8.78
  -6  -6   2   16.15    5.16
   5   6  -2  105.30    8.31
  -5  -6   2  109.54    9.46
  -5  -6   2  135.31   19.27
   4   6  -2    1.84    2.46
  -4  -6   2    4.19    4.27
  -4  -6   2    6.78    6.35
  -4  -6   2    6.01    5.04
   3   6  -2  154.57    9.43
  -3  -6   2  145.68   11.16
  -3  -6   2  149.66   10.16
  -3  -6   2  144.45   12.15
   2   6  -2  268.82   12.57
  -2  -6   2  266.99   13.47
  -2  -6   2  291.37   13.29
   1   6  -2 1993.89   63.43
   1   6  -2 1679.93   54.21
  -1  -6   2 1786.50   54.70
  -1  -6   2 1773.72   54.65
   0   6  -2 3878.66  109.16
   0   6  -2 3872.99  109.62
   0  -6   2 3789.63  109.59
   0  -6   2 3739.04  108.57
  -1   6  -2  558.01   19.16
  -1   6  -2  561.70   20.23
   1  -6   2  557.08   18.79
   1  -6   2  572.68   20.62
  -2   6  -2  635.33   21.85
  -2   6  -2  612.43   19.99
   2  -6   2  607.49   22.07
   2  -6   2  634.94   19.91
  -3   6  -2 1106.52   34.75
  -3   6  -2 1088.65   32.63
   3  -6   2 1088.97   35.03
   3  -6   2 1113.33   32.55
  -4   6  -2    2.20    3.26
  -4   6  -2    1.17    2.93
   4  -6   2    3.80    2.86
   4  -6   2    0.31    3.53
  -5   6  -2 1213.45   37.34
  -5   6  -2 1238.30   38.45
   5  -6   2 1237.66   38.66
   5  -6   2 1231.10   37.84
  -6   6  -2   65.96    6.22
  -6   6  -2   66.38    7.07
   6  -6   2   72.47    7.13
   6  -6   2   68.61    7.16
  -7   6  -2    1.16    4.65
  -7   6  -2    6.23    3.21
   7  -6   2   -2.53    3.86
   7  -6   2    0.82    3.70
  -8   6  -2  846.28   28.30
  -8   6  -2  815.53   30.56
   8  -6   2  869.08   29.01
  -9   6  -2   25.68    4.64
  -9   6  -2   29.46    7.49
   9  -6   2   33.84    5.69
 -10   6  -2  355.58   19.78
 -10   6  -2  388.28   15.59
 -10   6  -2  353.90   15.27
 -11   6  -2   42.25    9.33
 -11   6  -2   40.98    5.50
 -11   6  -2   49.70    5.77
 -12   6  -2    6.64    3.24
 -12   6  -2   13.60    3.65
 -12   6  -2    2.47    7.32
 -13   6  -2   53.22    5.41
 -13   6  -2   42.94   11.26
 -10  -5   2  127.51    9.70
   9   5  -2  444.78   22.00
  -9  -5   2  469.33   20.14
  -9  -5   2  515.51   29.41
   8   5  -2  513.43   20.76
  -8  -5   2  531.48   21.50
  -8  -5   2  564.68   29.79
   7   5  -2  659.12   31.35
  -7  -5   2  734.00   33.07
  -7  -5   2  682.01   25.53
   6   5  -2    6.32    3.53
  -6  -5   2   -6.48    3.32
  -6  -5   2   -4.87    6.45
   5   5  -2  108.65    8.00
  -5  -5   2   99.67    8.62
  -5  -5   2   99.24   10.91
  -5  -5   2  100.29   12.77
  -4  -5   2   19.68    4.50
  -4  -5   2   26.10    6.29
  -4  -5   2   20.82    6.65
   3   5  -2  195.70    9.89
  -3  -5   2  193.72   10.38
  -3  -5   2  189.57   11.68
   2   5  -2 1047.62   33.27
   2   5  -2 1022.46   34.85
  -2  -5   2 1044.53   34.64
  -2  -5   2 1068.99   33.57
   1   5  -2   90.74    8.35
   1   5  -2  122.55    7.54
  -1  -5   2  115.33    8.27
   0   5  -2 1580.08   46.86
   0   5  -2 1601.88   47.09
   0  -5   2 1551.89   46.47
   0  -5   2 1509.10   48.40
  -1   5  -2    0.71    3.39
   1  -5   2    4.07    3.79
   1  -5   2   -0.43    3.31
  -2   5  -2   42.36    4.47
  -2   5  -2   34.80    4.59
   2  -5   2   44.03    4.43
   2  -5   2   36.80    5.08
  -3   5  -2    4.01    3.65
  -3   5  -2    9.24    3.39
   3  -5   2    3.10    3.96
   3  -5   2    5.45    3.36
  -4   5  -2   -1.90    2.93
  -4   5  -2    3.44    3.71
   4  -5   2    0.71    3.44
   4  -5   2   -4.50    3.12
  -5   5  -2  426.34   16.79
  -5   5  -2  437.68   16.30
   5  -5   2  422.04   16.57
   5  -5   2  406.03   15.83
  -6   5  -2  340.60   15.18
  -6   5  -2  377.13   13.91
   6  -5   2  312.86   14.94
   6  -5   2  372.11   15.74
  -7   5  -2 1296.69   43.40
  -7   5  -2 1348.81   40.74
   7  -5   2 1340.25   41.07
  -8   5  -2  288.58   12.47
  -8   5  -2  294.83   16.50
   8  -5   2  301.21   13.18
  -9   5  -2  196.52   10.02
  -9   5  -2  207.53   10.27
  -9   5  -2  214.80   15.11
 -10   5  -2  219.93   10.54
 -10   5  -2  241.79   10.99
 -10   5  -2  208.39   16.07
 -11   5  -2   81.54   11.91
 -11   5  -2   81.18    6.37
 -11   5  -2   72.23    6.29
 -12   5  -2  236.06   10.97
 -12   5  -2  258.37   19.52
 -12   5  -2  245.24   10.82
 -13   5  -2   55.64   12.44
 -10  -4   2  160.76   10.45
   9   4  -2  204.78   11.98
  -9  -4   2  227.12   12.40
  -9  -4   2  253.41   32.14
   8   4  -2    3.94    3.06
  -8  -4   2    1.26    3.73
  -8  -4   2    6.81    7.59
   7   4  -2  219.56   11.35
  -7  -4   2  211.37   17.58
  -7  -4   2  218.33   11.87
   6   4  -2  787.30   27.27
  -6  -4   2  825.94   27.87
  -6  -4   2  804.07   34.00
  -6  -4   2  783.97   34.55
   5   4  -2   19.04    3.98
  -5  -4   2   11.16    7.34
  -5  -4   2   11.73    4.03
  -5  -4   2   17.52    7.33
  -4  -4   2 1506.34   47.59
  -4  -4   2 1600.37   51.87
  -4  -4   2 1598.51   50.85
   3   4  -2  374.13   14.35
  -3  -4   2  375.23   16.46
  -3  -4   2  364.17   14.59
   2   4  -2   11.65    4.89
  -2  -4   2    8.51    3.63
   1   4  -2    7.39    3.32
   1   4  -2    6.50    4.15
  -1  -4   2    7.80    3.64
  -1  -4   2    0.37    2.27
   0   4  -2  286.31   11.18
   0   4  -2  272.82   11.03
   0  -4   2  284.02   11.06
   0  -4   2  280.57   11.31
  -1   4  -2 2457.97   71.67
  -1   4  -2 2496.87   70.98
   1  -4   2 2529.35   71.89
   1  -4   2 2555.10   70.93
  -2   4  -2  222.39    9.26
  -2   4  -2  224.97    8.72
   2  -4   2  238.22    9.59
   2  -4   2  228.39    8.63
  -3   4  -2   39.41    4.15
  -3   4  -2   44.07    4.55
   3  -4   2   40.91    4.59
   3  -4   2   40.65    4.94
  -4   4  -2 4178.69  119.69
  -4   4  -2 4333.47  120.38
   4  -4   2 4311.31  119.90
   4  -4   2 4244.08  120.68
  -5   4  -2  462.64   16.12
  -5   4  -2  484.48   18.38
   5  -4   2  470.27   16.50
  -6   4  -2 3206.28   92.41
  -6   4  -2 3317.27   95.57
   6  -4   2 3174.88   95.69
   6  -4   2 3333.85   92.80
  -7   4  -2  113.42    6.54
  -7   4  -2  118.52   10.53
   7  -4   2  109.44    7.03
   7  -4   2  104.65   10.02
  -8   4  -2  467.02   16.88
  -8   4  -2  479.98   16.78
  -8   4  -2  475.99   21.99
  -9   4  -2   17.73    3.56
  -9   4  -2   14.54    3.28
  -9   4  -2   20.51    6.63
  -9   4  -2    7.17    6.60
 -10   4  -2  605.91   20.44
 -10   4  -2  576.52   27.61
 -11   4  -2  276.67   11.53
 -11   4  -2  274.65   19.85
 -12   4  -2  220.15   10.79
 -12   4  -2  215.82   12.57
 -12   4  -2  222.73   19.32
 -13   4  -2   87.59   17.95
 -11  -3   2   76.76    7.60
 -10  -3   2  110.19    8.81
 -10  -3   2  125.80    9.12
 -10  -3   2  137.33   17.51
  -9  -3   2  296.56   14.32
  -9  -3   2  323.67   22.53
   8   3  -2    5.25    3.43
  -8  -3   2    6.26    7.45
  -8  -3   2   15.50    4.32
   7   3  -2  236.84   11.78
  -7  -3   2  275.67   19.04
  -7  -3   2  254.67   12.44
   6   3  -2  170.93    9.35
  -6  -3   2  191.77   13.86
  -6  -3   2  172.97    9.89
  -6  -3   2  187.43   15.12
   5   3  -2    2.36    2.38
  -5  -3   2   -1.24    4.19
  -5  -3   2    1.94    2.83
  -5  -3   2    0.10    5.29
   4   3  -2    1.16    1.85
  -4  -3   2    0.95    3.97
   3   3  -2 1579.69   46.80
   3   3  -2 1545.82   49.31
  -3  -3   2 1607.65   49.25
  -3  -3   2 1575.23   46.97
   2   3  -2 1234.47   36.94
   2   3  -2 1226.91   38.72
  -2  -3   2 1247.55   37.14
  -2  -3   2 1211.59   38.33
   1   3  -2  144.57    7.70
   1   3  -2  150.92    7.00
  -1  -3   2  158.68    7.35
  -1  -3   2  149.95    7.62
   0   3  -2 3963.57  110.77
   0  -3   2 3951.77  110.75
  -1   3  -2   26.54    3.09
  -1   3  -2   22.91    2.90
   1  -3   2   23.69    3.14
   1  -3   2   23.34    3.09
  -2   3  -2 1568.14   44.42
  -2   3  -2 1505.56   44.35
   2  -3   2 1560.17   44.52
   2  -3   2 1543.60   44.40
  -3   3  -2   -0.21    2.60
  -3   3  -2    2.66    1.77
   3  -3   2   -0.17    1.99
   3  -3   2   -2.51    2.08
  -4   3  -2  567.85   20.60
  -4   3  -2  573.95   18.19
   4  -3   2  575.55   20.53
   4  -3   2  587.77   18.51
  -5   3  -2 3074.48   95.66
  -5   3  -2 3312.52   90.54
   5  -3   2 3145.55   90.57
   5  -3   2 3335.81   94.38
  -6   3  -2  153.96   10.74
  -6   3  -2  153.02    7.00
   6  -3   2  143.72    7.20
   6  -3   2  139.13   10.44
  -7   3  -2   28.35    3.58
  -7   3  -2   31.64    7.23
  -7   3  -2   35.72    3.69
   7  -3   2   32.26    6.86
  -8   3  -2   -6.32    5.46
  -8   3  -2   -1.43    1.99
  -8   3  -2   -1.20    2.37
  -9   3  -2  111.79    6.67
  -9   3  -2  109.86    6.20
 -10   3  -2  546.34   18.61
 -10   3  -2  568.25   27.56
 -10   3  -2  553.58   18.41
 -11   3  -2  308.28   11.49
 -11   3  -2  308.31   11.74
 -11   3  -2  305.68   21.38
 -12   3  -2    1.00    1.73
 -12   3  -2    0.80    8.63
 -11  -2   2   12.69    4.22
 -11  -2   2   10.35   13.44
 -10  -2   2   32.65    5.37
 -10  -2   2   22.37    5.43
 -10  -2   2   49.98   12.63
  -9  -2   2  177.69   10.26
  -9  -2   2  162.85   10.29
  -9  -2   2  152.38   16.44
   8   2  -2   -1.21    3.13
  -8  -2   2    6.34    6.67
  -8  -2   2    0.50    3.22
   7   2  -2   24.84    4.26
  -7  -2   2   20.05    4.46
  -7  -2   2   12.57    7.23
  -7  -2   2   22.67    7.46
   6   2  -2  445.51   16.58
  -6  -2   2  442.49   20.86
  -6  -2   2  456.50   22.11
  -6  -2   2  454.99   16.99
   5   2  -2  180.49    8.80
  -5  -2   2  162.83   11.47
  -5  -2   2  175.59   10.23
  -5  -2   2  207.05   13.30
   4   2  -2   10.37    2.89
  -4  -2   2   10.80    3.33
  -4  -2   2    7.68    4.33
   3   2  -2  112.91    9.21
  -3  -2   2  124.03    7.02
  -3  -2   2  116.73    9.19
   2   2  -2 1241.75   37.84
   2   2  -2 1253.65   36.35
  -2  -2   2 1200.50   36.30
   1   2  -2   39.78    3.56
   1   2  -2   36.44    4.52
  -1  -2   2   35.45    4.35
  -1  -2   2   39.88    3.78
  -1   2  -2  144.56    5.73
  -1   2  -2  145.92    6.59
   1  -2   2  141.88    5.90
  -2   2  -2 4612.49  128.03
  -2   2  -2 4763.49  129.16
   2  -2   2 4533.69  128.07
  -3   2  -2  210.15    7.16
  -3   2  -2  212.48    9.51
   3  -2   2  200.82    9.45
   3  -2   2  200.95    7.26
  -4   2  -2 1950.96   55.77
  -4   2  -2 1945.17   59.14
   4  -2   2 1984.05   55.91
   4  -2   2 2049.20   59.67
  -5   2  -2  431.91   13.45
  -5   2  -2  418.09   13.52
  -5   2  -2  416.90   18.12
   5  -2   2  407.11   18.09
  -6   2  -2  359.16   12.22
  -6   2  -2  399.82   17.86
  -6   2  -2  372.25   12.09
   6  -2   2  326.79   16.99
  -7   2  -2  748.18   28.96
  -7   2  -2  711.50   22.15
  -7   2  -2  697.12   21.90
  -8   2  -2   95.69    5.31
  -8   2  -2  100.65    5.73
  -8   2  -2   98.47   12.30
  -8   2  -2   99.64   10.77
  -9   2  -2   27.19    3.21
  -9   2  -2   32.83    9.08
  -9   2  -2   24.86    3.51
 -10   2  -2   49.53    4.23
 -10   2  -2   64.97   11.16
 -10   2  -2   55.77    4.63
 -11   2  -2   17.17    2.49
 -11   2  -2   16.35    2.64
 -11   2  -2   20.69    8.99
 -12   2  -2    9.33    9.16
 -11  -1   2  297.50   14.02
 -11  -1   2  353.07   24.43
 -11  -1   2  270.11   19.10
 -10  -1   2  258.67   13.28
 -10  -1   2  298.16   13.47
 -10  -1   2  269.74   21.03
  -9  -1   2  108.40   14.17
  -9  -1   2  112.13    8.72
  -9  -1   2  110.17    8.31
  -8  -1   2  164.37   15.51
  -8  -1   2  162.53    9.88
  -8  -1   2  151.88    9.27
  -7  -1   2   56.40    6.10
  -7  -1   2   72.19    9.12
  -7  -1   2   78.44   10.90
   6   1  -2    4.11    2.55
  -6  -1   2    5.62    3.07
  -6  -1   2    8.41    5.00
  -6  -1   2    1.31    5.23
   5   1  -2  339.81   12.70
  -5  -1   2  347.82   17.03
  -5  -1   2  328.00   12.77
  -5  -1   2  323.15   15.77
   4   1  -2  238.10    9.75
  -4  -1   2  237.55   12.77
  -4  -1   2  230.40    9.91
   3   1  -2  362.42   14.36
  -3  -1   2  348.69   12.24
  -3  -1   2  332.74   13.91
   2   1  -2  101.30    5.05
   2   1  -2  106.72    6.59
  -2  -1   2  102.97    6.30
  -2  -1   2  108.63    5.25
   0   1  -2    9.95    1.36
   0   1  -2    7.34    1.79
   0  -1   2    4.61    1.82
   0  -1   2    8.92    1.47
  -1   1  -2  323.38    9.49
  -1   1  -2  312.60   10.80
   1  -1   2  303.58    9.49
   1  -1   2  327.68   10.94
  -2   1  -2 7042.99  189.64
   2  -1   2 6691.92  192.01
   2  -1   2 7027.07  189.67
  -3   1  -2 1160.57   35.32
  -3   1  -2 1148.22   31.67
  -3   1  -2 1108.24   31.68
   3  -1   2 1117.63   35.35
  -4   1  -2  804.70   22.58
  -4   1  -2  756.47   27.25
  -4   1  -2  777.64   22.40
  -5   1  -2   71.71    3.87
  -5   1  -2   63.32    7.77
  -5   1  -2   61.06    3.44
   5  -1   2   61.70    8.03
  -6   1  -2  146.98    6.19
  -6   1  -2  147.97    5.93
  -6   1  -2  167.89   12.19
   6  -1   2  145.71   11.62
  -7   1  -2  124.06    5.67
  -7   1  -2  128.16   12.75
  -7   1  -2  129.15    6.04
  -8   1  -2   22.56    2.88
  -8   1  -2   21.54    3.04
  -8   1  -2   17.35    7.56
  -9   1  -2   32.12    3.47
  -9   1  -2   29.36    3.43
  -9   1  -2   32.26    8.66
 -10   1  -2    1.64    1.98
 -10   1  -2   10.11    7.91
 -10   1  -2    0.42    1.74
 -11   1  -2   17.76   10.45
 -12   0   2    7.73    3.00
 -11   0   2  274.03   14.00
 -11   0   2  304.69   24.69
 -11   0   2  328.74   14.22
 -10   0   2   97.52    8.28
 -10   0   2  112.48   15.21
 -10   0   2  108.13    8.06
  -9   0   2   29.62    4.75
  -9   0   2   30.70    8.87
  -9   0   2   20.67    4.96
  -8   0   2   12.69    6.29
  -8   0   2   15.48    4.36
  -8   0   2   16.33    3.86
  -8   0   2   20.10    7.50
  -7   0   2   52.08    9.54
  -7   0   2   50.55    5.91
  -7   0   2   44.16    5.01
  -7   0   2   38.25    7.56
  -6   0   2   62.01    5.28
  -6   0   2   48.18    6.63
  -6   0   2   72.29    7.14
  -6   0   2   74.25    9.41
  -5   0   2   64.09    7.98
  -5   0   2   70.89    8.71
  -5   0   2   60.92    5.35
  -4   0   2 1398.84   40.16
  -4   0   2 1312.95   42.31
   3   0  -2  502.66   16.29
   3   0  -2  528.48   18.10
  -3   0   2  491.71   17.75
  -3   0   2  527.84   16.48
   2   0  -2  559.85   18.12
   2   0  -2  544.69   17.16
  -2   0   2  574.13   17.32
  -2   0   2  558.08   18.09
   1   0  -2  697.12   20.66
   1   0  -2  693.63   20.25
  -1   0   2  680.60   20.59
   0   0  -2    3.45    1.55
   0   0   2    3.52    1.00
   0   0   2    5.10    1.51
  -1   0  -2 4888.64  133.86
   1   0   2 4909.54  133.96
   1   0   2 4654.50  132.01
  -2   0  -2 2976.44   85.56
   2   0   2 3030.82   85.73
  -3   0  -2  889.42   25.22
  -3   0  -2  906.98   29.59
   3   0   2  902.32   29.71
  -4   0  -2  228.84    7.78
  -4   0  -2  230.36   13.34
  -4   0  -2  224.45    7.52
   4   0   2  242.71   13.55
  -5   0  -2    0.80    1.62
  -5   0  -2    0.55    4.61
  -5   0  -2    0.09    1.28
   5   0   2    0.90    4.24
  -6   0  -2  526.72   23.51
  -6   0  -2  556.06   16.95
  -6   0  -2  560.87   17.17
  -7   0  -2  307.05   18.20
  -7   0  -2  307.14   10.96
  -7   0  -2  315.21   10.80
  -7   0  -2  307.14   17.36
  -8   0  -2   33.58    3.59
  -8   0  -2   33.19    8.76
  -8   0  -2   37.18    3.90
  -9   0  -2   23.06    2.95
  -9   0  -2   21.49    2.95
  -9   0  -2   10.93    8.00
 -10   0  -2   65.35   12.33
 -11   0  -2  117.81   16.03
 -12   1   2    4.93    2.98
 -12   1   2    1.13    8.14
 -11   1   2   -6.23    6.72
 -11   1   2   -1.53    2.76
 -11   1   2    2.37    3.46
 -10   1   2   22.23    5.03
 -10   1   2   24.74    4.69
 -10   1   2   21.66    8.40
  -9   1   2    2.11    3.04
  -9   1   2    5.77    3.70
  -9   1   2   17.95    7.83
  -8   1   2  207.72   10.36
  -8   1   2  198.29   14.23
  -8   1   2  215.63   11.04
  -8   1   2  193.07   15.21
  -7   1   2  652.11   22.92
  -7   1   2  633.40   26.04
  -7   1   2  658.96   22.50
  -7   1   2  712.54   27.78
  -6   1   2    5.57    5.22
  -6   1   2    8.27    2.82
  -6   1   2    0.83    3.87
  -5   1   2   -1.02    4.98
  -5   1   2    0.46    2.46
  -5   1   2    1.04    4.00
  -5   1   2    4.33    3.32
  -4   1   2  160.16    7.41
  -4   1   2  158.26    7.98
  -4   1   2  142.92    8.87
   3  -1  -2 2839.21   80.86
  -3   1   2 2883.47   80.87
  -3   1   2 2800.94   80.28
   1  -1  -2  725.74   21.78
   1  -1  -2  736.71   21.28
  -1   1   2  718.51   21.75
  -1   1   2  742.03   21.27
  -1  -1  -2   11.02    1.70
  -1  -1  -2   14.16    3.23
   1   1   2   10.07    1.66
   1   1   2   11.88    2.95
  -2  -1  -2 5581.62  153.58
  -2  -1  -2 5615.51  150.50
   2   1   2 5338.37  150.42
   2   1   2 5328.98  153.53
  -3  -1  -2  344.66   15.70
  -3  -1  -2  363.57   11.12
   3   1   2  352.04   11.03
   3   1   2  330.81   15.72
  -4  -1  -2  223.27    7.96
  -4  -1  -2  239.27   13.51
   4   1   2  223.33   13.35
   4   1   2  218.40    7.84
  -5  -1  -2  409.05   19.25
  -5  -1  -2  408.08   13.17
   5   1   2  407.43   13.06
  -6  -1  -2   78.01    4.68
  -6  -1  -2   72.37    9.62
  -6  -1  -2   92.17   12.19
  -7  -1  -2  143.40   13.79
  -7  -1  -2  135.23   14.63
  -7  -1  -2  138.89    6.82
  -7  -1  -2  144.61    6.58
  -8  -1  -2  113.23    6.11
  -8  -1  -2  110.48    5.88
  -8  -1  -2  130.33   14.62
  -9  -1  -2  231.29   18.88
  -9  -1  -2  223.54    8.90
  -9  -1  -2  223.27    8.69
 -13   2   2  172.86   10.13
 -12   2   2    0.16    3.91
 -12   2   2    5.21    3.11
 -11   2   2   31.62    5.59
 -11   2   2   38.46    5.61
 -11   2   2   32.54   10.09
 -10   2   2    1.34    7.05
 -10   2   2   -0.03    3.52
 -10   2   2   -3.88    2.78
  -9   2   2  440.25   17.83
  -9   2   2  474.49   17.68
  -9   2   2  421.18   21.98
  -9   2   2  426.12   22.93
  -8   2   2  860.07   28.89
  -8   2   2  854.79   28.44
  -8   2   2  878.26   32.75
  -8   2   2  846.28   33.38
  -7   2   2   32.27    5.95
  -7   2   2   44.18    5.43
  -7   2   2   44.09    5.07
  -7   2   2   40.26    7.30
  -6   2   2 1181.34   37.68
  -6   2   2 1286.75   40.88
  -6   2   2 1167.38   39.48
  -6   2   2 1252.64   37.71
  -5   2   2  120.05    9.65
  -5   2   2  123.84    8.93
  -5   2   2  129.27    7.89
  -5   2   2  123.61    7.40
   4  -2  -2  334.28   13.14
  -4   2   2  356.85   13.23
  -4   2   2  348.94   13.50
   3  -2  -2 4811.27  132.00
  -3   2   2 4666.53  131.88
   0  -2  -2  260.31    9.38
   0  -2  -2  260.97    9.28
   0   2   2  256.23    9.50
  -1  -2  -2  980.33   32.64
  -1  -2  -2 1124.40   31.52
   1   2   2 1089.42   33.11
   1   2   2 1119.22   31.47
  -2  -2  -2 2170.81   62.49
  -2  -2  -2 1968.46   59.26
   2   2   2 2191.09   59.44
   2   2   2 2070.23   62.41
  -3  -2  -2    9.69    5.44
  -3  -2  -2    8.01    2.45
   3   2   2    7.85    5.15
   3   2   2    4.57    2.20
  -4  -2  -2 2500.38   76.90
  -4  -2  -2 2583.44   71.56
   4   2   2 2503.31   71.37
  -5  -2  -2    4.10    2.22
  -5  -2  -2    8.18    4.72
  -5  -2  -2    5.38    5.09
   5   2   2    3.15    1.87
  -6  -2  -2  629.48   26.78
  -6  -2  -2  658.17   28.06
  -6  -2  -2  632.57   20.33
   6   2   2  631.32   20.15
  -7  -2  -2  565.57   18.70
  -7  -2  -2  598.90   27.54
   7   2   2  558.07   18.52
  -8  -2  -2   29.64    9.43
  -8  -2  -2   21.85    3.45
  -8  -2  -2   21.82    3.36
  -9  -2  -2   24.09    9.27
  -9  -2  -2   23.68    3.25
  -9  -2  -2   25.43    3.30
 -10  -2  -2   47.82   12.31
 -13   3   2  130.68   16.81
 -13   3   2  140.21    9.20
 -12   3   2   14.80    9.18
 -12   3   2   22.78    4.81
 -12   3   2   23.16    4.90
 -11   3   2   30.30    9.75
 -11   3   2   31.46    5.29
 -10   3   2   45.47    9.35
 -10   3   2   47.48    6.13
 -10   3   2   53.95    6.76
  -9   3   2   57.11    9.70
  -9   3   2   57.83    6.47
  -9   3   2   51.15    8.64
  -9   3   2   48.31    6.34
  -8   3   2   58.48    6.45
  -8   3   2   63.12    6.43
  -8   3   2   58.07    8.88
  -8   3   2   53.72    7.81
  -7   3   2  285.73   12.75
  -7   3   2  308.39   14.89
  -7   3   2  305.74   13.27
  -7   3   2  296.59   15.53
   6  -3  -2  346.18   14.30
  -6   3   2  324.80   14.70
  -6   3   2  350.67   18.42
  -6   3   2  345.17   13.95
   5  -3  -2  143.88    8.93
  -5   3   2  146.59    8.85
  -5   3   2  149.33    9.70
   4  -3  -2 2551.48   71.24
  -4   3   2 2412.41   70.43
  -4   3   2 2427.04   70.12
  -4   3   2 2428.37   70.96
   3  -3  -2  371.35   13.67
  -3   3   2  359.69   11.86
  -3   3   2  364.57   13.53
   2  -3  -2 3041.14   85.36
  -2   3   2 2967.56   85.21
   1  -3  -2  752.29   23.19
   1  -3  -2  734.05   21.41
  -1   3   2  726.20   21.62
  -1   3   2  738.44   23.13
   0  -3  -2  114.44    6.17
   0  -3  -2  123.68    6.20
   0   3   2   93.49    5.55
   0   3   2  115.13    6.33
  -1  -3  -2   13.61    4.15
  -1  -3  -2    9.05    3.00
   1   3   2   13.23    3.05
   1   3   2   14.46    4.66
  -2  -3  -2 1569.31   49.21
  -2  -3  -2 1624.47   46.55
   2   3   2 1587.94   46.43
  -3  -3  -2  346.85   16.38
  -3  -3  -2  364.45   12.87
   3   3   2  350.68   12.65
  -4  -3  -2 1816.09   58.19
  -4  -3  -2 1880.16   59.10
  -4  -3  -2 1859.22   53.65
   4   3   2 1823.93   53.45
  -5  -3  -2  325.26   20.14
  -5  -3  -2  335.62   18.55
  -5  -3  -2  336.11   12.65
   5   3   2  325.91   12.31
  -6  -3  -2   99.36   13.64
  -6  -3  -2   91.69    6.39
  -6  -3  -2   95.78   12.55
   6   3   2   94.08    6.00
  -7  -3  -2  122.29    7.16
  -7  -3  -2  110.02   13.86
   7   3   2  116.55    6.68
  -8  -3  -2    8.64    8.30
  -8  -3  -2    2.30    2.76
  -9  -3  -2   40.65   16.33
  -9  -3  -2   39.64    4.70
  -9  -3  -2   42.05    4.61
 -13   4   2   69.93   12.37
 -12   4   2  122.64    9.29
 -12   4   2  114.27    9.16
 -12   4   2  101.70   14.00
 -11   4   2    2.89    6.60
 -11   4   2    5.62    3.55
 -11   4   2   -6.49    3.11
 -10   4   2    3.64    3.92
 -10   4   2    3.92    3.41
 -10   4   2   -4.63    5.71
  -9   4   2  134.57   12.68
  -9   4   2  128.19    9.01
  -9   4   2  111.27    9.15
  -9   4   2  122.24   12.74
  -8   4   2  167.26    9.91
  -8   4   2  170.94   10.37
  -8   4   2  166.96   12.35
  -8   4   2  182.32   11.89
   7  -4  -2   50.23    6.13
  -7   4   2   39.23    5.53
  -7   4   2   34.68    6.40
  -7   4   2   35.04    5.78
   6  -4  -2  777.28   26.23
  -6   4   2  751.05   26.24
  -6   4   2  778.64   25.98
  -6   4   2  749.73   25.91
   5  -4  -2 1275.91   39.15
  -5   4   2 1224.83   37.70
  -5   4   2 1213.14   38.64
  -5   4   2 1269.44   38.15
  -4   4   2  144.65    7.43
  -4   4   2  144.66    7.23
  -4   4   2  143.80    9.02
   3  -4  -2  663.42   22.48
  -3   4   2  654.97   22.28
   2  -4  -2   36.93    4.44
  -2   4   2   39.73    4.63
   1  -4  -2 2371.94   65.43
   1  -4  -2 2300.96   67.43
  -1   4   2 2315.80   67.37
   0  -4  -2  250.96   11.27
   0  -4  -2  256.33   11.00
   0   4   2  266.08   11.06
  -1  -4  -2 2908.20   82.12
  -1  -4  -2 2739.64   80.74
  -2  -4  -2  142.50    9.34
  -2  -4  -2  155.05    7.96
  -2  -4  -2  149.39   10.19
   2   4   2  153.10    7.82
  -3  -4  -2   97.07    8.80
  -3  -4  -2  113.55    6.87
  -3  -4  -2  103.22    9.78
   3   4   2   92.36    6.27
  -4  -4  -2   76.94    6.16
  -4  -4  -2   69.27    9.16
  -4  -4  -2   78.25   10.20
   4   4   2   68.02    8.87
  -5  -4  -2  561.53   24.97
  -5  -4  -2  585.47   26.16
  -5  -4  -2  581.25   22.50
   5   4   2  558.00   19.54
  -6  -4  -2  107.94   13.37
  -6  -4  -2  117.66    7.76
   6   4   2  117.66    7.10
  -7  -4  -2   24.33    4.31
  -7  -4  -2   27.61    8.84
   7   4   2   27.90    3.88
  -8  -4  -2  126.13   16.04
  -8  -4  -2  124.32    7.78
   8   4   2  117.67    7.14
  -9  -4  -2   -6.72    7.17
 -14   5   2   13.46    3.57
 -14   5   2   -2.62    8.94
 -13   5   2  216.70   12.41
 -13   5   2  210.33   18.35
 -12   5   2  306.08   20.26
 -12   5   2  308.29   15.40
 -11   5   2   15.37    4.60
 -11   5   2   14.75    4.88
 -11   5   2   19.37    7.46
 -10   5   2  162.34   12.57
 -10   5   2  164.07   13.66
 -10   5   2  156.83   11.04
 -10   5   2  168.35   10.64
  -9   5   2   32.71    5.86
  -9   5   2   27.48    7.69
  -9   5   2   29.91    5.60
  -9   5   2   30.09    6.66
   8  -5  -2  806.34   28.46
  -8   5   2  781.20   28.50
  -8   5   2  772.84   28.98
  -8   5   2  802.69   28.08
   7  -5  -2  447.40   18.47
  -7   5   2  454.63   18.27
  -7   5   2  458.91   17.86
   6  -5  -2  885.99   30.18
  -6   5   2  892.42   28.79
  -6   5   2  883.07   28.48
  -6   5   2  893.77   29.85
   5  -5  -2  943.38   31.81
  -5   5   2  954.05   29.23
  -5   5   2 1001.77   31.92
  -5   5   2  972.87   29.49
   4  -5  -2  544.90   19.95
  -4   5   2  526.97   19.70
   3  -5  -2   72.00    7.39
  -3   5   2   72.52    7.01
   2  -5  -2  103.29    8.03
  -2   5   2  110.05    7.80
   1  -5  -2  249.38   11.81
   1  -5  -2  249.84    9.76
   1  -5  -2  260.38    9.83
  -1   5   2  260.08   11.70
   0  -5  -2   94.29    6.82
   0  -5  -2  100.70    7.66
   0  -5  -2   97.72    7.04
   0   5   2  100.31    7.22
  -1  -5  -2  457.92   17.83
  -1  -5  -2  492.48   18.46
  -1  -5  -2  468.21   17.42
  -2  -5  -2    8.47    3.52
  -2  -5  -2    2.92    4.48
   2   5   2    3.35    2.81
  -3  -5  -2    1.89    4.25
  -3  -5  -2    4.18    5.20
  -3  -5  -2    1.15    3.34
   3   5   2    4.24    3.04
  -4  -5  -2   96.16   11.59
  -4  -5  -2  102.92    7.78
   4   5   2   93.34    7.10
  -5  -5  -2 1008.99   32.15
   5   5   2  957.72   31.68
  -6  -5  -2   65.18   11.27
  -6  -5  -2   49.63    6.02
   6   5   2   48.95    5.51
  -7  -5  -2   36.59   10.37
  -7  -5  -2   34.12    5.23
   7   5   2   46.89    5.12
  -8  -5  -2   12.19    3.81
  -8  -5  -2   23.58    9.95
   8   5   2    8.01    3.55
 -14   6   2   -6.15    6.57
 -14   6   2   20.61    4.21
 -13   6   2   68.53    7.92
 -13   6   2   54.37   10.88
 -12   6   2   95.42   12.44
 -12   6   2   98.38    9.14
 -11   6   2  111.27   14.23
 -11   6   2   86.33    8.37
 -10   6   2  137.56   10.34
 -10   6   2  135.41   10.39
 -10   6   2  136.28   12.28
   9  -6  -2  312.80   16.13
  -9   6   2  322.44   16.70
  -9   6   2  326.25   16.12
  -9   6   2  325.42   16.60
   8  -6  -2 1503.25   48.71
  -8   6   2 1511.94   48.44
  -8   6   2 1508.42   47.61
  -8   6   2 1534.73   48.08
   7  -6  -2 3156.50   94.02
  -7   6   2 3143.93   91.73
  -7   6   2 3221.71   92.04
  -7   6   2 3220.25   93.74
   6  -6  -2   17.67    5.11
  -6   6   2   12.90    4.45
  -6   6   2   13.55    3.57
  -6   6   2   18.41    3.47
   5  -6  -2  164.13   10.10
  -5   6   2  161.31    9.66
   4  -6  -2   48.81    5.92
  -4   6   2   42.79    5.61
   3  -6  -2 4348.92  123.89
  -3   6   2 4300.78  123.71
   2  -6  -2  742.15   25.76
  -2   6   2  741.78   25.65
   1  -6  -2  251.49    9.93
   1  -6  -2  269.69   12.42
   1  -6  -2  250.26    9.95
  -1   6   2  246.10   11.83
   0  -6  -2 1043.36   33.52
   0  -6  -2 1034.26   32.58
   0  -6  -2 1020.63   32.25
   0   6   2 1003.42   33.14
  -1  -6  -2  270.31   13.12
  -1  -6  -2  284.44   13.63
  -1  -6  -2  285.41   13.21
   1   6   2  304.82   12.96
  -2  -6  -2   53.32    8.06
  -2  -6  -2   55.38    7.31
  -2  -6  -2   54.86    6.39
   2   6   2   41.14    5.51
  -3  -6  -2   58.59    9.02
  -3  -6  -2   50.88    7.71
  -3  -6  -2   56.62    6.51
   3   6   2   50.25    5.92
  -4  -6  -2  100.11   10.74
  -4  -6  -2  101.16   11.90
  -4  -6  -2  100.56    8.40
   4   6   2   85.52    7.44
  -5  -6  -2  101.45   12.98
  -5  -6  -2   84.20    8.01
   5   6   2   85.77    7.25
  -6  -6  -2   -2.99    3.45
  -6  -6  -2   -1.55    6.96
   6   6   2    8.78    3.35
  -7  -6  -2  528.42   28.42
  -7  -6  -2  522.70   20.16
   7   6   2  508.55   19.46
  -8  -6  -2    4.03    3.48
  -8  -6  -2    6.41    9.12
 -14   7   2  163.52   21.50
 -14   7   2  191.26   12.67
 -13   7   2   10.78    4.48
 -13   7   2    2.10    6.73
 -12   7   2  339.24   19.57
 -12   7   2  322.54   16.57
 -11   7   2  170.75   12.15
 -11   7   2  161.81   11.71
 -11   7   2  173.45   13.54
  10  -7  -2 1606.53   55.11
 -10   7   2 1486.57   50.36
 -10   7   2 1581.14   51.07
   9  -7  -2   86.63    9.80
  -9   7   2   91.04    9.46
  -9   7   2  101.74    8.90
  -9   7   2   90.35    9.34
   8  -7  -2    0.14    4.78
  -8   7   2    8.75    4.61
  -8   7   2    4.76    4.71
   7  -7  -2   11.82    5.09
  -7   7   2   11.61    3.79
  -7   7   2    7.34    4.87
  -7   7   2    9.04    3.82
   6  -7  -2 1493.04   48.57
  -6   7   2 1533.00   48.34
   5  -7  -2 1016.50   34.05
  -5   7   2  954.11   33.31
   4  -7  -2   15.58    4.65
  -4   7   2   19.29    4.75
   3  -7  -2  207.43   11.60
  -3   7   2  188.29   10.92
   2  -7  -2 3477.96  100.66
  -2   7   2 3409.57  100.37
   1  -7  -2   -1.03    2.69
   1  -7  -2    3.91    2.72
   1  -7  -2   -1.70    3.82
  -1   7   2    0.43    3.43
   0  -7  -2    1.57    4.11
   0  -7  -2    8.24    4.05
   0  -7  -2    1.93    3.34
   0   7   2    4.17    4.26
  -1  -7  -2   42.69    6.57
  -1  -7  -2   45.31    6.50
  -1  -7  -2   52.08    7.31
   1   7   2   38.38    5.65
  -2  -7  -2  403.85   18.54
  -2  -7  -2  437.56   19.41
  -2  -7  -2  383.72   17.38
  -3  -7  -2   47.50    6.64
  -3  -7  -2   47.23    8.70
   3   7   2   47.32    6.15
  -4  -7  -2    5.92    4.55
  -4  -7  -2    0.99    6.20
   4   7   2    3.34    3.44
  -5  -7  -2  494.07   25.19
  -5  -7  -2  453.78   19.42
  -6  -7  -2   21.37    8.85
  -6  -7  -2   33.42    5.85
  -7  -7  -2   75.09   12.98
  -7  -7  -2   79.16    7.97
 -14   8   2   11.08    4.72
 -14   8   2    1.47    7.12
 -13   8   2  300.36   18.86
 -13   8   2  289.24   16.30
 -12   8   2  269.10   15.60
  11  -8  -2   99.36   11.13
 -11   8   2  100.29   10.97
 -11   8   2  107.54   15.95
  10  -8  -2  726.08   29.32
 -10   8   2  752.64   27.53
 -10   8   2  715.14   26.86
   9  -8  -2   58.99    8.87
  -9   8   2   55.98    7.40
  -9   8   2   62.41    7.38
   8  -8  -2    6.82    5.32
  -8   8   2    7.85    4.97
  -8   8   2   11.50    3.83
  -8   8   2   13.61    4.11
   7  -8  -2    3.86    4.77
  -7   8   2   -1.16    3.88
   6  -8  -2  467.84   20.44
  -6   8   2  463.87   20.03
   5  -8  -2  361.86   17.46
  -5   8   2  364.21   16.83
   4  -8  -2  166.54   11.39
   3  -8  -2  444.27   19.57
  -3   8   2  482.75   20.95
   2  -8  -2   95.79    9.29
  -2   8   2   92.39    8.74
   1  -8  -2   47.68    5.17
   1  -8  -2   42.42    5.13
   1  -8  -2   38.82    6.65
  -1   8   2   61.37    8.18
   0  -8  -2  231.77   13.23
   0  -8  -2  212.56   11.11
   0  -8  -2  204.76   11.62
  -1  -8  -2    6.21    4.27
  -1  -8  -2    2.60    4.71
  -1  -8  -2   12.01    5.50
   1   8   2    4.22    4.17
  -2  -8  -2   28.54    6.46
  -2  -8  -2   36.37    7.68
  -2  -8  -2   25.34    5.94
  -3  -8  -2   54.29    8.48
  -3  -8  -2   41.10    6.87
  -3  -8  -2   47.03    8.94
   3   8   2   44.86    6.29
  -4  -8  -2   10.74    4.95
  -4  -8  -2    4.60    6.52
   4   8   2   15.03    3.72
  -5  -8  -2   87.13    9.33
  -5  -8  -2   85.47   12.71
  -6  -8  -2    0.00    3.98
  -7  -8  -2  333.29   16.17
 -13   9   2   15.40    6.71
 -13   9   2   10.73    5.51
 -12   9   2  154.42   12.16
  11  -9  -2  449.80   22.65
 -11   9   2  462.97   20.17
 -11   9   2  518.80   20.42
  10  -9  -2   97.81   11.14
 -10   9   2   75.38    8.14
 -10   9   2  116.86    8.39
   9  -9  -2  272.72   16.16
  -9   9   2  255.48   11.24
  -9   9   2  253.14   11.21
   8  -9  -2  190.61   13.78
   7  -9  -2  255.30   15.15
   6  -9  -2  160.90   14.46
   5  -9  -2  644.99   25.80
  -5   9   2  619.69   25.21
   4  -9  -2 3721.54  112.02
  -4   9   2 3849.24  111.94
   3  -9  -2 1013.34   35.62
  -3   9   2  975.11   35.06
   2  -9  -2  125.66   10.78
  -2   9   2  110.83    9.84
   1  -9  -2  493.46   17.47
   1  -9  -2  471.22   17.00
   1  -9  -2  446.18   20.58
  -1   9   2  471.69   20.52
   0  -9  -2  304.94   14.07
   0  -9  -2  326.17   14.70
   0  -9  -2  292.94   16.09
   0   9   2  316.62   16.13
  -1  -9  -2   19.83    6.83
  -1  -9  -2   31.25    6.77
  -1  -9  -2   22.62    5.46
  -2  -9  -2   29.25    6.03
  -2  -9  -2   15.44    5.63
  -2  -9  -2   22.59    6.93
  -3  -9  -2   29.06    7.82
  -3  -9  -2   23.79    6.30
  -4  -9  -2   -1.64    4.08
  -4  -9  -2   -1.81    6.25
  -5  -9  -2    2.07    4.39
  -5  -9  -2    4.68    7.28
  -6  -9  -2   42.31   11.13
  -6  -9  -2   38.63    7.10
 -13  10   2  241.59   14.70
  12 -10  -2  371.26   20.36
 -12  10   2  336.97   16.40
  11 -10  -2   18.47    7.06
 -11  10   2   13.93    4.79
  10 -10  -2   35.64    8.04
   9 -10  -2  215.76   15.27
   8 -10  -2  194.52   14.09
   7 -10  -2  295.86   17.20
   6 -10  -2    1.40    5.34
   5 -10  -2  161.82   12.63
   4 -10  -2   53.99    8.25
   3 -10  -2  565.53   24.37
   2 -10  -2  223.63   14.33
   1 -10  -2    0.28    3.44
   1 -10  -2    3.09    5.34
   1 -10  -2    3.71    3.06
   0 -10  -2   91.89    7.59
   0 -10  -2   87.91    8.68
   0 -10  -2   89.52   10.42
  -1 -10  -2  760.01   28.10
  -1 -10  -2  759.38   29.97
  -1 -10  -2  766.84   28.85
  -2 -10  -2  145.04   12.65
  -2 -10  -2  144.38   12.14
  -3 -10  -2    5.95    6.54
  -3 -10  -2   12.27    5.73
  -4 -10  -2  106.64   11.22
  -4 -10  -2  100.72   12.94
  -5 -10  -2  103.58   14.38
  -5 -10  -2   95.76   10.73
  13 -11  -2  315.83   20.01
  12 -11  -2   32.79    8.74
  11 -11  -2  128.93   13.32
  10 -11  -2   34.63    8.23
   9 -11  -2 1336.98   47.99
   8 -11  -2   37.64    8.32
   7 -11  -2  226.56   15.61
   6 -11  -2  160.75   13.39
   5 -11  -2    7.39    6.00
   4 -11  -2  180.22   13.88
   3 -11  -2  316.41   18.28
   2 -11  -2  298.14   17.48
   1 -11  -2  181.57    9.23
   1 -11  -2  160.46    9.28
   1 -11  -2  159.81   13.49
   0 -11  -2  277.12   17.27
   0 -11  -2  251.68   13.98
   0 -11  -2  322.23   13.41
  -1 -11  -2    6.45    6.17
  -1 -11  -2   -3.16    4.76
  -2 -11  -2  161.72   13.79
  -2 -11  -2  157.34   13.36
  -3 -11  -2  337.37   20.51
  -3 -11  -2  369.80   19.75
  -4 -11  -2   37.09    7.65
  -4 -11  -2   27.84   10.22
  12 -12  -2   54.03    9.75
  11 -12  -2   58.07   10.41
  10 -12  -2   30.21    8.06
   9 -12  -2   17.27    7.31
   8 -12  -2   27.11    7.95
   7 -12  -2    8.70    6.68
   6 -12  -2  151.83   14.00
   5 -12  -2  100.43   11.80
   4 -12  -2   18.43    7.76
   3 -12  -2   20.05    7.02
   2 -12  -2   16.68    7.69
   1 -12  -2  410.47   21.94
   0 -12  -2   84.08    8.57
   0 -12  -2  118.09   12.56
  -1 -12  -2   20.57    8.16
  -1 -12  -2   -0.64    5.39
  -2 -12  -2   21.04    7.27
  -2 -12  -2    8.88    6.95
  10 -13  -2   40.95   10.13
   9 -13  -2  520.84   26.47
   8 -13  -2  190.97   16.66
   7 -13  -2  226.30   17.01
   6 -13  -2  154.61   15.06
   5 -13  -2   -0.40    6.59
   4 -13  -2  178.67   16.13
   3 -13  -2  131.15   14.66
   2 -13  -2  207.33   16.35
   1 -13  -2   47.19   10.04
   0 -13  -2    5.44    6.90
  -1 -13  -2  727.74   39.51
   5 -14  -2   77.75   18.78
  -1 -14   3  117.16   12.41
   0 -14   3   62.85    8.88
   1 -14   3   25.89    5.97
   1 -14   3   25.36   10.29
   2 -14   3    9.99    7.35
   3 -14   3   16.55    8.21
   4 -14   3   71.66   11.82
   5 -14   3   12.06    7.83
   6 -14   3  287.77   19.84
   7 -14   3  125.86   14.39
   8 -14   3   19.24    8.32
   9 -14   3   89.95   12.08
  10 -14   3  146.92   14.75
  -2 -13   3   22.49    7.36
  -2 -13   3   18.39   12.74
  -1 -13   3   20.69    6.66
  -1 -13   3   22.44    8.43
   0 -13   3  460.60   21.21
   0 -13   3  484.58   24.79
   1 -13   3  409.71   16.82
   1 -13   3  428.10   18.52
   2 -13   3   89.09    6.79
   2 -13   3   71.00   10.57
   2 -13   3   68.68    7.17
   3 -13   3   24.74    7.85
   4 -13   3  178.52   15.30
   5 -13   3  106.90   12.13
   6 -13   3   11.08    6.92
   7 -13   3  376.11   21.17
   8 -13   3   52.02    9.72
   9 -13   3   94.75   11.93
  11 -13   3   -2.26    5.68
  12 -13   3  564.09   27.26
  -4 -12   3   65.16   10.86
  -4 -12   3   59.12   11.11
  -3 -12   3   11.43    7.63
  -3 -12   3    8.16    6.81
  -2 -12   3    5.43    6.20
  -1 -12   3   33.35    7.50
  -1 -12   3   30.17    8.95
   0 -12   3  226.21   16.41
   0 -12   3  237.03   12.21
   0 -12   3  221.77   13.92
   1 -12   3  269.50   14.26
   1 -12   3  267.73   12.69
   1 -12   3  297.05   18.08
   2 -12   3  275.15   13.04
   2 -12   3  250.62   17.19
   2 -12   3  271.51   12.02
   3 -12   3  185.66   15.13
   3 -12   3  208.67    9.91
   4 -12   3    1.44    5.55
   5 -12   3 1086.81   40.29
   6 -12   3  461.75   22.72
   7 -12   3  929.71   35.94
   8 -12   3   15.31    6.34
   9 -12   3 1126.40   41.83
 -10  12  -3   23.74    4.38
  10 -12   3   12.74    6.32
 -11  12  -3   45.87    6.39
  11 -12   3   40.99    8.88
 -12  12  -3   36.65    6.80
  12 -12   3   37.56    8.20
  -5 -11   3   21.44    9.08
  -5 -11   3   36.37    8.75
  -4 -11   3  111.67   14.76
  -4 -11   3  125.62   14.01
  -3 -11   3   36.21    8.76
  -3 -11   3   20.81    7.90
  -2 -11   3   63.82   10.20
  -2 -11   3   84.32   10.85
  -1 -11   3  665.17   28.77
  -1 -11   3  706.35   28.39
  -1 -11   3  671.84   26.29
   0 -11   3  107.60    8.61
   0 -11   3   88.57   10.82
   0 -11   3   75.73    9.60
   1 -11   3    1.06    4.40
   1 -11   3    2.68    5.60
   1 -11   3    1.48    3.44
   2 -11   3  110.86   11.88
   3 -11   3  506.05   23.46
   3 -11   3  519.32   17.74
   4 -11   3   68.14    9.36
   5 -11   3    4.62    5.65
   6 -11   3   24.25    6.96
   7 -11   3  199.30   14.52
  -8  11  -3   25.87    4.59
   8 -11   3   14.93    6.03
  -9  11  -3  238.88   12.02
  -9  11  -3  235.79   11.97
   9 -11   3  250.83   15.80
 -10  11  -3  151.69    9.55
 -10  11  -3  118.08    9.86
  10 -11   3  139.94   12.54
 -11  11  -3    9.97    5.16
  11 -11   3   10.55    5.68
  12 -11   3   81.56   10.31
 -13  11  -3   34.87    8.04
  13 -11   3   38.08    8.22
  -6 -10   3    2.44    8.29
  -5 -10   3   28.19    9.19
  -5 -10   3   44.43    8.32
  -4 -10   3   19.62    8.23
  -4 -10   3   23.02    6.90
  -3 -10   3   -0.36    5.88
  -3 -10   3   -0.36    5.48
  -2 -10   3   59.02    8.94
  -2 -10   3   62.77   10.05
  -2 -10   3   63.94    8.89
  -1 -10   3  931.42   34.47
  -1 -10   3  917.84   33.02
  -1 -10   3  926.45   34.79
   0 -10   3  180.36   13.42
   0 -10   3  184.11   11.38
   1 -10   3   88.36   10.41
   1 -10   3  103.65    8.07
  -2  10  -3  226.33   11.45
   2 -10   3  219.90   10.68
   2 -10   3  198.52   16.95
  -3  10  -3 1113.05   34.00
   3 -10   3 1092.74   33.31
   3 -10   3 1054.96   41.31
  -4  10  -3  277.87   11.39
  -4  10  -3  330.11   18.40
   4 -10   3  281.20   11.10
   4 -10   3  278.64   15.94
  -5  10  -3   66.62    9.51
   5 -10   3   44.12    7.69
  -6  10  -3   22.84    4.20
  -6  10  -3   12.85    8.06
   6 -10   3   21.22    6.35
   6 -10   3   25.52    4.27
  -7  10  -3   55.88    6.48
   7 -10   3   66.67   12.66
   7 -10   3   51.44    6.26
  -8  10  -3   28.48    5.52
   8 -10   3   28.23    5.10
   8 -10   3   25.51    7.07
  -9  10  -3   18.78    5.63
   9 -10   3   24.41    6.65
 -10  10  -3    1.44    4.87
 -10  10  -3    1.68    3.94
  10 -10   3    0.90    4.84
 -11  10  -3  265.29   13.49
 -11  10  -3  211.32   14.30
  11 -10   3  222.02   14.64
 -12  10  -3   -0.46    5.56
  12 -10   3    1.17    5.04
 -13  10  -3  150.89   14.08
  -7  -9   3   22.28    6.91
  -6  -9   3    6.54    5.85
  -6  -9   3   -7.12    8.17
  -5  -9   3  219.52   17.95
  -5  -9   3  177.27   13.94
  -4  -9   3   92.28   10.36
  -4  -9   3   76.46   11.25
  -3  -9   3  113.69    8.33
  -3  -9   3  165.56   12.38
  -3  -9   3  148.94   17.47
  -2  -9   3  285.04   16.97
  -2  -9   3  254.88   15.26
   1   9  -3    1.41    4.31
  -1  -9   3    3.83    4.45
  -1  -9   3    8.61    5.20
   0   9  -3  306.03   15.36
   0   9  -3  295.58   15.23
   0  -9   3  296.75   14.38
   0  -9   3  331.91   16.59
  -1   9  -3   -2.89    3.53
   1  -9   3    1.29    4.61
   1  -9   3    1.51    3.41
  -2   9  -3  541.14   21.58
  -2   9  -3  521.93   19.29
   2  -9   3  526.34   21.97
   2  -9   3  531.33   18.72
  -3   9  -3   93.01    6.81
  -3   9  -3   89.16    8.39
   3  -9   3  101.46    9.89
   3  -9   3   98.33    6.66
  -4   9  -3    1.74    4.26
  -4   9  -3    4.13    3.30
   4  -9   3    6.13    3.10
   4  -9   3   15.90    5.61
  -5   9  -3 1199.12   36.84
  -5   9  -3 1228.32   40.83
   5  -9   3 1242.22   41.06
   5  -9   3 1213.50   36.96
  -6   9  -3   42.26    5.51
  -6   9  -3   43.49    6.79
   6  -9   3   50.84    7.76
   6  -9   3   42.21    5.45
  -7   9  -3   42.96    6.23
  -7   9  -3   40.47    6.53
   7  -9   3   51.50    7.78
  -8   9  -3   66.56    7.84
  -8   9  -3   63.09    8.33
   8  -9   3   70.52    7.96
   8  -9   3   70.41    8.70
  -9   9  -3   31.34    6.62
  -9   9  -3   16.89    4.74
   9  -9   3   21.19    6.09
 -10   9  -3  239.74   14.41
 -10   9  -3  223.62   12.75
 -10   9  -3  223.88   16.35
  10  -9   3  234.95   14.05
 -11   9  -3  182.18   16.17
  11  -9   3  200.99   14.91
 -12   9  -3  345.96   19.41
  12  -9   3  343.46   17.58
 -13   9  -3   98.40   12.81
 -13   9  -3  107.57    8.68
  -8  -8   3    4.52    5.37
  -7  -8   3    9.09    8.41
  -7  -8   3    5.51    5.37
  -6  -8   3  114.51   15.06
  -6  -8   3  109.07   10.82
  -5  -8   3  208.04   17.46
  -5  -8   3  243.76   14.67
  -4  -8   3   17.06    6.33
  -4  -8   3   22.06    8.22
   3   8  -3   82.63    8.39
  -3  -8   3   68.62    8.76
  -3  -8   3   68.85   10.12
  -3  -8   3   78.96    9.59
   2   8  -3  564.99   22.67
  -2  -8   3  581.75   23.58
   1   8  -3  729.00   27.63
   1   8  -3  768.74   27.83
  -1  -8   3  723.85   26.93
  -1  -8   3  742.23   27.72
   0   8  -3    1.74    4.37
   0   8  -3   -0.68    2.77
   0  -8   3   -1.05    4.32
   0  -8   3    0.41    3.63
  -1   8  -3  425.25   16.88
  -1   8  -3  417.37   17.83
   1  -8   3  427.02   18.40
   1  -8   3  438.70   16.41
  -2   8  -3  103.24    7.19
  -2   8  -3  116.59    8.48
   2  -8   3  111.75    7.16
   2  -8   3  109.99    9.07
  -3   8  -3   44.78    6.01
  -3   8  -3   39.12    5.15
   3  -8   3   45.99    6.70
   3  -8   3   37.86    4.88
  -4   8  -3    0.31    2.81
  -4   8  -3    4.28    3.56
   4  -8   3   -2.13    2.59
   4  -8   3    4.74    4.55
  -5   8  -3   13.39    4.28
  -5   8  -3   24.81    4.43
   5  -8   3   16.40    5.08
   5  -8   3   11.99    3.74
  -6   8  -3 2481.28   72.13
  -6   8  -3 2451.29   73.78
   6  -8   3 2440.08   72.47
   6  -8   3 2504.19   74.39
  -7   8  -3  319.05   14.84
  -7   8  -3  316.63   14.85
   7  -8   3  330.52   15.11
   7  -8   3  352.10   16.07
  -8   8  -3  772.91   27.63
  -8   8  -3  733.95   27.02
   8  -8   3  779.79   28.35
   8  -8   3  757.76   27.78
  -9   8  -3   38.55    7.47
  -9   8  -3   35.70    5.72
   9  -8   3   39.77    6.70
 -10   8  -3   15.89    6.38
  10  -8   3   11.93    5.00
 -11   8  -3   -1.01    2.84
 -11   8  -3    2.49    6.15
  11  -8   3    9.96    4.55
 -12   8  -3  830.21   34.00
 -12   8  -3  778.35   28.42
 -12   8  -3  823.29   28.74
 -13   8  -3  181.77   16.88
 -13   8  -3  233.48   11.46
  -9  -7   3  383.98   18.92
  -8  -7   3   89.01    9.83
  -8  -7   3   80.37   14.60
  -7  -7   3   29.02    6.65
  -7  -7   3   32.26   10.00
  -6  -7   3    5.02    4.61
  -6  -7   3   -2.68    6.72
   5   7  -3   45.41    6.02
  -5  -7   3   55.40    7.63
  -5  -7   3   47.20   10.16
   4   7  -3  357.28   16.33
  -4  -7   3  368.56   20.38
  -4  -7   3  348.26   16.86
  -4  -7   3  323.35   18.18
  -3  -7   3  224.80   12.97
  -3  -7   3  223.70   14.01
   2   7  -3 2632.47   79.15
   2   7  -3 2547.97   80.26
  -2  -7   3 2786.54   79.67
   1   7  -3  197.33   11.82
   1   7  -3  194.86   10.79
  -1  -7   3  179.19   10.98
  -1  -7   3  195.92   11.43
   0   7  -3   20.59    4.50
   0   7  -3   19.34    4.58
   0  -7   3   20.73    5.06
  -1   7  -3  487.93   19.16
  -1   7  -3  508.34   18.44
   1  -7   3  511.83   19.68
   1  -7   3  514.59   18.05
  -2   7  -3  138.63    8.65
  -2   7  -3  142.99    8.04
   2  -7   3  141.20    7.69
   2  -7   3  149.75    9.57
  -3   7  -3   28.95    4.25
  -3   7  -3   39.09    5.55
   3  -7   3   39.08    4.50
   3  -7   3   23.42    4.78
  -4   7  -3  316.50   13.90
  -4   7  -3  342.48   12.84
   4  -7   3  324.41   12.57
   4  -7   3  317.05   14.40
  -5   7  -3   63.62    6.36
  -5   7  -3   59.36    6.47
   5  -7   3   58.81    6.65
   5  -7   3   64.75    6.27
  -6   7  -3   54.86    6.21
  -6   7  -3   59.86    6.69
   6  -7   3   73.24    7.47
  -7   7  -3  542.02   20.16
  -7   7  -3  550.40   20.98
   7  -7   3  521.09   21.36
   7  -7   3  548.07   23.90
  -8   7  -3  249.42   12.22
  -8   7  -3  253.26   14.22
   8  -7   3  254.99   14.41
   8  -7   3  228.71   12.67
  -9   7  -3   29.04    4.99
  -9   7  -3   22.37    7.02
   9  -7   3   23.04    6.27
   9  -7   3   26.41    5.47
 -10   7  -3  121.44   11.85
 -10   7  -3  116.19    8.34
  10  -7   3  125.05    9.51
 -11   7  -3  206.15   10.83
 -11   7  -3  204.10   11.01
 -11   7  -3  214.47   15.82
 -12   7  -3  139.06    8.62
 -12   7  -3  140.16    8.58
 -12   7  -3  147.76   15.04
 -13   7  -3  130.94   19.70
 -13   7  -3  127.38    8.09
  -9  -6   3   15.29    5.18
  -8  -6   3  348.67   17.34
  -8  -6   3  378.08   28.24
  -7  -6   3  464.40   22.95
  -7  -6   3  431.87   25.75
   6   6  -3   15.43    4.22
  -6  -6   3   19.16    5.48
  -6  -6   3   18.17    8.22
   5   6  -3   33.76    7.21
  -5  -6   3   53.34    7.21
   4   6  -3    0.94    3.27
  -4  -6   3   -0.81    5.82
  -4  -6   3    1.65    4.29
  -4  -6   3   -5.46    4.46
   3   6  -3  321.72   14.64
  -3  -6   3  333.12   16.67
  -3  -6   3  341.03   15.29
   2   6  -3  479.59   18.55
   2   6  -3  470.36   20.09
  -2  -6   3  487.03   19.00
  -2  -6   3  486.19   19.69
   1   6  -3 1629.98   51.13
   1   6  -3 1621.32   50.36
  -1  -6   3 1696.19   50.81
   0   6  -3  688.82   24.31
   0   6  -3  730.99   24.57
   0  -6   3  703.59   24.58
   0  -6   3  704.66   23.89
  -1   6  -3   69.20    6.77
  -1   6  -3   71.29    6.54
   1  -6   3   74.12    7.48
   1  -6   3   70.21    6.55
  -2   6  -3  214.58   10.00
  -2   6  -3  212.99   10.51
   2  -6   3  224.89   11.31
   2  -6   3  223.73    9.97
  -3   6  -3   33.38    4.71
  -3   6  -3   49.56    5.58
   3  -6   3   33.52    4.50
   3  -6   3   30.97    5.12
  -4   6  -3  873.96   26.96
  -4   6  -3  823.28   27.30
   4  -6   3  829.55   26.82
   4  -6   3  824.64   27.69
  -5   6  -3   59.27    6.60
  -5   6  -3   61.55    5.67
   5  -6   3   55.16    6.36
   5  -6   3   56.24    6.33
  -6   6  -3  192.81   10.83
  -6   6  -3  194.15    9.60
   6  -6   3  191.63   10.12
   6  -6   3  201.61   11.40
  -7   6  -3   45.09    5.23
  -7   6  -3   42.14    7.03
   7  -6   3   44.77    7.11
   7  -6   3   41.63    5.70
  -8   6  -3  415.92   19.98
  -8   6  -3  468.99   17.24
   8  -6   3  464.49   17.83
  -9   6  -3   27.21    4.50
  -9   6  -3   32.41    7.85
   9  -6   3   27.08    5.13
 -10   6  -3  731.42   30.74
 -10   6  -3  742.79   24.92
 -10   6  -3  711.59   24.76
 -11   6  -3  410.55   22.52
 -11   6  -3  415.48   16.15
 -11   6  -3  431.08   16.17
 -12   6  -3  161.87   16.28
 -12   6  -3  175.15    8.83
 -12   6  -3  171.58    8.82
 -13   6  -3    8.26    8.32
 -10  -5   3   23.25    5.59
  -9  -5   3   20.87   10.15
  -9  -5   3   11.97    4.92
   8   5  -3   80.02    7.46
  -8  -5   3   65.09   12.46
  -8  -5   3   79.11    8.67
   7   5  -3    8.83    3.57
  -7  -5   3   10.99    4.77
  -7  -5   3    0.19    7.17
   6   5  -3  157.37    9.87
  -6  -5   3  159.10   10.76
  -6  -5   3  164.82   15.69
  -5  -5   3  503.16   22.69
  -5  -5   3  428.69   23.02
  -5  -5   3  492.91   19.46
   4   5  -3  443.31   17.33
  -4  -5   3  423.33   17.57
  -4  -5   3  427.56   19.91
   3   5  -3    7.43    3.23
   3   5  -3    3.99    4.40
  -3  -5   3    0.05    3.11
  -3  -5   3    2.04    4.25
   2   5  -3  117.45    9.51
   2   5  -3  111.43    7.35
  -2  -5   3  111.72    8.71
  -2  -5   3  100.65    8.02
   1   5  -3 1467.79   46.14
   1   5  -3 1538.88   45.40
  -1  -5   3 1456.39   45.40
   0   5  -3  217.21   10.29
   0   5  -3  204.49   10.71
   0  -5   3  202.15   10.56
   0  -5   3  206.77   10.77
  -1   5  -3 1542.44   51.10
  -1   5  -3 1670.32   49.16
   1  -5   3 1727.06   49.06
   1  -5   3 1717.80   50.05
  -2   5  -3   23.23    3.88
  -2   5  -3   37.18    4.99
   2  -5   3   39.23    5.32
   2  -5   3   36.42    4.81
  -3   5  -3  471.76   16.62
  -3   5  -3  452.34   16.63
   3  -5   3  475.39   16.57
   3  -5   3  455.46   16.92
  -4   5  -3  416.38   15.57
  -4   5  -3  399.35   14.72
   4  -5   3  385.60   15.10
   4  -5   3  398.59   15.50
  -5   5  -3   39.74    4.63
  -5   5  -3   36.14    5.42
   5  -5   3   46.08    6.17
   5  -5   3   41.34    4.89
  -6   5  -3   31.12    5.77
  -6   5  -3   32.63    4.11
   6  -5   3   29.41    4.27
  -7   5  -3  167.29   11.81
   7  -5   3  164.97   11.73
   7  -5   3  160.54    8.89
  -8   5  -3  831.51   31.82
  -8   5  -3  872.95   27.44
   8  -5   3  834.43   32.40
  -9   5  -3  271.56   16.96
  -9   5  -3  242.90   10.86
 -10   5  -3   17.48    3.50
 -10   5  -3    7.86    7.41
 -11   5  -3  593.39   20.09
 -11   5  -3  591.04   28.69
 -12   5  -3   43.27   10.83
 -12   5  -3   56.44    4.44
 -13   5  -3   53.98   11.79
 -11  -4   3   49.55    6.82
 -10  -4   3  227.86   32.51
 -10  -4   3  163.65   11.19
   9   4  -3  154.99   10.62
  -9  -4   3  161.94   10.97
  -9  -4   3  199.12   21.52
   8   4  -3    1.08    3.06
  -8  -4   3   -0.60    3.82
  -8  -4   3   -2.22    7.16
   7   4  -3   59.99    6.83
  -7  -4   3   60.56    7.19
  -7  -4   3   58.54   10.94
   6   4  -3 1032.14   33.73
  -6  -4   3 1051.18   40.10
  -6  -4   3  945.98   38.20
  -6  -4   3 1050.25   34.27
  -5  -4   3  230.67   15.80
  -5  -4   3  207.79   11.28
  -5  -4   3  214.25   18.05
   4   4  -3  413.41   16.18
   4   4  -3  420.33   19.22
  -4  -4   3  428.11   19.03
  -4  -4   3  431.94   16.74
   3   4  -3   87.57    6.58
   3   4  -3   89.33    9.01
  -3  -4   3   95.11    7.41
  -3  -4   3  105.53    8.82
   2   4  -3   47.32    5.40
  -2  -4   3   45.10    6.36
  -2  -4   3   45.72    6.13
   1   4  -3 1358.35   42.59
   1   4  -3 1395.79   41.72
  -1  -4   3 1413.31   42.53
  -1  -4   3 1370.68   41.85
   0   4  -3  683.24   22.20
   0   4  -3  665.86   21.80
   0  -4   3  662.42   21.95
  -1   4  -3   29.61    3.90
  -1   4  -3   23.32    3.42
   1  -4   3   23.40    3.81
   1  -4   3   32.02    3.91
  -2   4  -3  265.18   10.35
  -2   4  -3  279.83   10.76
   2  -4   3  260.85   10.64
   2  -4   3  277.57   10.62
  -3   4  -3 1673.34   48.94
  -3   4  -3 1656.10   48.38
   3  -4   3 1625.99   48.49
   3  -4   3 1697.50   49.09
  -4   4  -3 1948.08   57.33
  -4   4  -3 1941.70   58.71
   4  -4   3 2089.79   57.73
  -5   4  -3  448.79   14.99
   5  -4   3  438.11   17.82
   5  -4   3  420.86   15.16
  -6   4  -3   39.28    6.67
  -6   4  -3   33.34    3.67
   6  -4   3   32.45    6.45
   6  -4   3   29.52    3.97
  -7   4  -3  332.44   17.12
  -7   4  -3  330.99   12.20
   7  -4   3  349.10   17.38
   7  -4   3  319.68   12.48
  -8   4  -3  229.49    9.46
  -8   4  -3  224.57    9.36
  -8   4  -3  214.79   15.29
  -9   4  -3  160.43   14.51
  -9   4  -3  163.25    7.65
  -9   4  -3  152.95    7.41
 -10   4  -3   13.26    3.03
 -10   4  -3    5.54    2.19
 -10   4  -3    4.14    7.14
 -11   4  -3  375.12   13.16
 -11   4  -3  380.46   13.08
 -11   4  -3  402.23   23.70
 -12   4  -3    0.05    8.31
 -11  -3   3   48.35    6.64
 -10  -3   3    2.23    3.91
 -10  -3   3   22.17   10.22
 -10  -3   3    9.98    4.08
   9   3  -3   31.63    5.23
  -9  -3   3   29.49    9.84
  -9  -3   3   26.54    5.39
   8   3  -3    6.80    3.53
  -8  -3   3   -4.42    6.76
  -8  -3   3    5.00    4.01
   7   3  -3  149.98    9.34
  -7  -3   3  140.75   14.99
  -7  -3   3  160.08   10.02
   6   3  -3  780.07   26.43
  -6  -3   3  791.02   32.24
  -6  -3   3  774.05   26.72
  -6  -3   3  753.83   30.43
  -5  -3   3  122.11   10.50
  -5  -3   3  125.68    8.19
   4   3  -3 1080.91   37.43
   4   3  -3 1126.36   34.47
  -4  -3   3 1099.62   34.62
  -4  -3   3 1097.00   37.12
   3   3  -3   19.73    5.38
  -3  -3   3   22.87    5.68
  -3  -3   3   20.14    3.96
   2   3  -3  692.05   22.37
   2   3  -3  671.80   24.06
  -2  -3   3  676.53   22.47
  -2  -3   3  701.99   23.92
   1   3  -3   38.91    4.09
   1   3  -3   41.50    5.27
  -1  -3   3   46.71    4.66
  -1  -3   3   42.69    5.14
   0   3  -3  189.49    7.91
   0   3  -3  191.43    8.47
   0  -3   3  179.52    8.06
   0  -3   3  197.12    8.25
  -1   3  -3   95.30    5.74
  -1   3  -3   97.60    5.16
   1  -3   3   89.67    5.24
  -2   3  -3 3498.52   97.12
  -2   3  -3 3579.63   97.88
   2  -3   3 3344.45   97.10
  -3   3  -3 2999.25   84.62
  -3   3  -3 3046.83   86.21
   3  -3   3 3039.75   84.75
   3  -3   3 3003.82   86.43
  -4   3  -3  923.27   30.73
  -4   3  -3  907.40   27.73
   4  -3   3  957.98   28.05
   4  -3   3  969.89   31.19
  -5   3  -3  111.82    5.47
  -5   3  -3  119.63    9.97
   5  -3   3  124.22    9.99
   5  -3   3  109.33    5.77
  -6   3  -3  213.98    8.20
  -6   3  -3  228.32   13.17
   6  -3   3  210.77   12.95
  -7   3  -3 1064.60   31.99
  -7   3  -3 1064.66   31.87
  -7   3  -3 1099.95   38.51
   7  -3   3 1115.39   38.98
  -8   3  -3   70.61   10.10
  -8   3  -3   74.52    4.56
  -8   3  -3   80.79    4.87
   8  -3   3   77.26   10.41
  -9   3  -3  128.39   13.71
  -9   3  -3  115.30    5.68
  -9   3  -3  130.36    6.05
 -10   3  -3  124.47    5.78
 -10   3  -3  130.01    5.69
 -10   3  -3  151.04   15.54
 -11   3  -3   35.59   10.18
 -12   3  -3   30.74   10.55
 -12  -2   3   44.41    8.83
 -11  -2   3   63.16    7.40
 -11  -2   3   64.34   13.20
 -10  -2   3  245.45   13.71
 -10  -2   3  289.69   14.12
 -10  -2   3  301.57   22.13
  -9  -2   3  645.67   31.08
  -9  -2   3  630.35   23.03
  -9  -2   3  533.48   22.75
   8   2  -3  354.28   15.30
  -8  -2   3  333.03   15.33
  -8  -2   3  365.90   22.28
   7   2  -3   51.90    5.84
  -7  -2   3   69.00   11.06
  -7  -2   3   62.37    6.74
  -7  -2   3   64.51   10.08
   6   2  -3    1.97    2.73
  -6  -2   3   -2.21    2.99
  -6  -2   3   -0.25    4.63
  -6  -2   3   -0.34    5.34
  -5  -2   3  331.86   15.81
  -5  -2   3  297.97   12.86
   4   2  -3  128.74    8.24
   4   2  -3  128.23   10.30
  -4  -2   3  123.16    9.74
  -4  -2   3  127.41    7.68
   3   2  -3  646.95   21.10
   3   2  -3  653.17   23.59
  -3  -2   3  618.88   24.90
  -3  -2   3  647.78   21.30
   2   2  -3  451.17   15.27
   2   2  -3  462.64   16.86
  -2  -2   3  465.58   15.49
  -2  -2   3  431.48   16.39
   1   2  -3   -0.79    2.41
   1   2  -3    1.61    1.73
  -1  -2   3   -0.62    2.57
  -1  -2   3    2.08    2.02
   0   2  -3 2957.90   82.69
   0  -2   3 2919.25   82.15
   0  -2   3 2913.06   82.56
  -2   2  -3   46.39    2.88
  -2   2  -3   48.34    4.85
   2  -2   3   41.98    3.09
   2  -2   3   42.23    4.71
  -3   2  -3    0.07    1.16
  -3   2  -3   -0.61    3.14
   3  -2   3    1.34    3.14
   3  -2   3    1.71    1.43
  -4   2  -3 1718.30   49.05
  -4   2  -3 1784.53   53.61
   4  -2   3 1724.67   49.19
   4  -2   3 1787.36   56.31
  -5   2  -3  104.69    4.31
  -5   2  -3   95.77    9.34
  -5   2  -3  101.44    4.38
   5  -2   3   98.44    9.50
  -6   2  -3  423.32   13.35
  -6   2  -3  462.15   19.96
  -6   2  -3  446.33   13.53
   6  -2   3  415.67   19.54
  -7   2  -3  104.34   11.32
  -7   2  -3  104.64    4.61
  -7   2  -3  105.82    4.83
   7  -2   3  115.67   11.59
  -8   2  -3  266.39    9.13
  -8   2  -3  273.99   17.75
  -8   2  -3  275.72    9.33
  -9   2  -3    5.09    6.87
 -10   2  -3  101.63   13.55
 -11   2  -3   94.65   14.18
 -12   2  -3  162.81   23.97
 -11  -1   3   28.43    5.61
 -11  -1   3   45.52   11.73
 -11  -1   3   27.66    5.31
 -10  -1   3   19.54    4.81
 -10  -1   3   13.00    4.35
 -10  -1   3   19.37    9.60
  -9  -1   3    6.66    3.80
  -9  -1   3   12.09    4.29
  -9  -1   3   13.77    8.44
  -8  -1   3  386.32   16.96
  -8  -1   3  404.10   16.54
  -8  -1   3  417.71   23.20
   7   1  -3   87.34    7.17
  -7  -1   3   90.67    7.19
  -7  -1   3   97.40   12.48
  -7  -1   3   95.72   10.74
   6   1  -3   59.17    5.67
  -6  -1   3   60.83    8.90
  -6  -1   3   56.73    5.82
  -6  -1   3   57.49    7.54
   5   1  -3  599.98   22.44
  -5  -1   3  552.04   21.81
  -5  -1   3  489.04   20.20
   4   1  -3   10.18    3.02
   4   1  -3    2.67    4.69
  -4  -1   3    7.42    4.65
  -4  -1   3    4.63    2.97
   3   1  -3 1177.23   37.15
   3   1  -3 1193.53   35.35
  -3  -1   3 1144.99   36.93
  -3  -1   3 1218.27   35.54
   2   1  -3  386.09   14.58
   2   1  -3  426.14   13.66
  -2  -1   3  419.07   13.76
  -2  -1   3  389.32   14.54
   1   1  -3 2323.00   66.99
  -1  -1   3 2425.68   66.40
  -1  -1   3 2309.89   66.89
  -1   1  -3 2472.33   67.35
  -1   1  -3 2374.64   68.80
   1  -1   3 2441.57   67.37
   1  -1   3 2418.53   68.84
  -2   1  -3  591.28   19.51
  -2   1  -3  588.02   16.53
   2  -1   3  612.95   19.74
   2  -1   3  553.68   16.53
  -3   1  -3  923.93   29.85
   3  -1   3  909.64   29.98
  -4   1  -3   11.10    5.16
   4  -1   3   11.77    5.43
  -5   1  -3    7.25    5.18
   5  -1   3    5.33    4.78
  -6   1  -3  181.54   12.83
   6  -1   3  169.52   12.73
  -7   1  -3 3338.93   93.45
  -7   1  -3 3469.97  103.11
  -7   1  -3 3333.87   93.49
   7  -1   3 3388.15  103.48
  -8   1  -3  218.68   16.61
  -9   1  -3   26.81    9.00
 -10   1  -3  337.39   22.69
 -11   1  -3    4.21    8.55
 -12   0   3   22.13   10.65
 -12   0   3   43.17    6.06
 -11   0   3   50.64    6.31
 -11   0   3   34.64   11.07
 -11   0   3   33.70    5.80
 -10   0   3  159.73   10.02
 -10   0   3  160.61   16.53
 -10   0   3  142.51   11.47
  -9   0   3   92.38    7.69
  -9   0   3   62.66   11.32
  -9   0   3   90.78    8.39
  -8   0   3 1516.32   51.53
  -8   0   3 1365.88   44.85
  -8   0   3 1417.40   44.46
  -8   0   3 1402.28   49.34
  -7   0   3   -1.43    3.21
  -7   0   3    2.72    4.93
  -7   0   3   -1.95    2.56
  -7   0   3   -0.68    5.98
  -6   0   3   37.35    7.14
  -6   0   3   34.00    4.50
  -6   0   3   38.27    5.40
  -6   0   3   39.99    6.90
   5   0  -3  400.77   17.49
  -5   0   3  412.76   17.39
  -5   0   3  382.00   14.74
   4   0  -3    6.06    4.87
   4   0  -3    7.18    2.83
  -4   0   3   -1.06    3.86
  -4   0   3    6.14    3.21
   3   0  -3  117.18    7.47
   3   0  -3  127.14    6.17
  -3   0   3  126.77    6.34
  -3   0   3  110.74    7.20
   2   0  -3  627.24   20.20
   2   0  -3  618.68   19.40
  -2   0   3  628.72   20.15
   0   0   3 4728.63  130.67
  -1   0  -3 2826.91   78.32
   1   0   3 2688.29   76.35
   1   0   3 2779.54   78.39
   1   0   3 2755.45   76.26
  -2   0  -3 1184.91   35.53
   2   0   3 1113.37   35.44
  -3   0  -3   61.79    7.96
   3   0   3   67.32    7.74
  -4   0  -3  765.06   27.92
   4   0   3  779.91   28.34
  -5   0  -3  684.51   26.61
   5   0   3  698.43   26.98
  -6   0  -3  117.49    4.31
  -6   0  -3  108.63   11.14
   6   0   3  116.09   11.34
  -7   0  -3  778.67   31.99
  -8   0  -3    1.93    6.75
  -9   0  -3   74.87   12.20
 -10   0  -3   10.56    8.17
 -11   0  -3   -3.48    8.01
 -13   1   3   32.35    5.01
 -12   1   3  186.15   19.24
 -12   1   3  190.61   11.21
 -11   1   3   20.10    9.16
 -11   1   3   28.37    4.97
 -11   1   3   16.52    4.78
 -10   1   3  176.75   11.16
 -10   1   3  196.43   17.00
 -10   1   3  181.32   10.67
  -9   1   3   20.35    4.42
  -9   1   3   32.56    8.58
  -9   1   3   21.68    5.04
  -8   1   3   69.79    6.77
  -8   1   3   76.76    7.86
  -8   1   3   82.25   11.09
  -8   1   3   78.86   10.04
  -7   1   3 1210.66   38.72
  -7   1   3 1258.55   42.34
  -7   1   3 1214.42   39.20
  -7   1   3 1275.46   43.53
  -6   1   3  477.49   20.63
  -6   1   3  460.49   17.57
  -6   1   3  477.20   17.21
  -6   1   3  470.24   19.62
   5  -1  -3  623.89   24.01
  -5   1   3  653.66   21.87
  -5   1   3  660.10   23.86
  -5   1   3  682.98   22.78
   4  -1  -3   51.70    6.02
  -4   1   3   48.81    5.14
  -4   1   3   52.67    5.42
  -4   1   3   52.21    6.69
   3  -1  -3 2205.11   68.48
  -3   1   3 2402.98   68.69
  -3   1   3 2519.92   68.45
  -3   1   3 2440.39   68.61
   2  -1  -3 1916.21   54.82
   2  -1  -3 1952.47   54.53
  -2   1   3 1875.75   54.74
  -2   1   3 1881.00   54.34
   1  -1  -3   15.82    2.88
   1  -1  -3   16.86    2.84
  -1   1   3   16.91    2.94
  -1   1   3   14.38    2.75
   0  -1  -3  296.05   10.29
   0  -1  -3  284.99    9.64
   0   1   3  257.07    9.50
   0   1   3  286.71   10.30
  -1  -1  -3 4785.13  132.87
  -1  -1  -3 4804.05  131.08
   1   1   3 4640.80  130.99
   1   1   3 4755.51  133.07
  -2  -1  -3  350.53   11.13
  -2  -1  -3  381.34   14.73
   2   1   3  353.50   11.10
   2   1   3  363.29   14.83
  -3  -1  -3  690.25   27.45
  -3  -1  -3  687.16   20.07
   3   1   3  683.71   19.98
   3   1   3  694.87   25.49
  -4  -1  -3 2898.17   80.82
  -4  -1  -3 3042.87   87.21
   4   1   3 2916.42   80.73
   4   1   3 2789.74   86.95
  -5  -1  -3  976.03   34.08
  -5  -1  -3  870.54   26.47
   5   1   3  919.86   26.39
   5   1   3  915.40   33.97
  -6  -1  -3  704.52   20.89
  -6  -1  -3  704.80   20.98
  -6  -1  -3  704.48   29.11
  -7  -1  -3    9.47    2.10
  -7  -1  -3   16.47    7.34
  -7  -1  -3   10.85    2.00
  -8  -1  -3  185.02   16.57
  -9  -1  -3   76.04   12.60
 -10  -1  -3   53.12   11.87
 -13   2   3   20.30    4.63
 -12   2   3   93.85   16.62
 -12   2   3  101.27    8.37
 -11   2   3   33.75    5.46
 -11   2   3   37.30    6.02
 -11   2   3   59.87   11.29
 -10   2   3   -3.24    6.31
 -10   2   3    4.19    3.45
 -10   2   3   -0.63    3.85
  -9   2   3   32.37    5.77
  -9   2   3   56.27    9.41
  -9   2   3   33.72    8.77
  -9   2   3   34.07    5.48
  -8   2   3    4.70    6.54
  -8   2   3    6.72    3.57
  -8   2   3    1.73    3.61
  -8   2   3    7.84    5.38
  -7   2   3  597.31   21.83
  -7   2   3  629.53   25.12
  -7   2   3  575.59   21.16
  -7   2   3  605.91   23.91
  -6   2   3  968.34   32.94
  -6   2   3  955.47   33.61
  -6   2   3  940.42   30.98
  -6   2   3 1038.95   31.88
  -5   2   3    2.05    3.29
  -5   2   3    2.37    3.86
  -5   2   3   -0.73    3.97
   4  -2  -3  707.76   23.60
   4  -2  -3  741.46   23.64
  -4   2   3  696.95   23.45
  -4   2   3  685.14   23.44
   3  -2  -3  147.56    7.02
   3  -2  -3  141.06    7.50
  -3   2   3  151.41    6.98
  -3   2   3  142.93    7.50
   2  -2  -3  776.35   24.19
   2  -2  -3  758.83   22.96
  -2   2   3  791.22   22.97
  -2   2   3  765.30   24.11
   1  -2  -3  237.26    8.47
   1  -2  -3  243.74    9.23
  -1   2   3  231.96    9.20
  -1   2   3  232.99    8.39
   0  -2  -3   16.90    2.91
   0  -2  -3   15.28    2.55
   0   2   3   13.13    2.78
  -1  -2  -3  141.34    8.06
  -1  -2  -3  144.65    6.34
   1   2   3  139.90    8.25
   1   2   3  149.79    6.45
  -2  -2  -3  138.40    6.46
  -2  -2  -3  141.47   10.15
   2   2   3  136.52    6.41
   2   2   3  147.55   10.57
  -3  -2  -3  231.41   13.09
  -3  -2  -3  240.89    8.82
   3   2   3  234.21    8.69
   3   2   3  252.74   13.52
  -4  -2  -3   36.04    3.48
  -4  -2  -3   27.01    6.40
   4   2   3   25.62    2.82
   4   2   3   26.81    6.21
  -5  -2  -3  996.69   36.96
  -5  -2  -3 1026.59   30.05
   5   2   3 1014.93   29.86
  -6  -2  -3 1072.53   39.55
  -6  -2  -3 1098.91   32.11
  -6  -2  -3 1053.89   40.37
   6   2   3 1112.49   31.93
  -7  -2  -3  264.75   18.48
  -7  -2  -3  286.96   10.17
  -8  -2  -3   22.92    8.94
  -8  -2  -3   36.43    3.42
  -8  -2  -3   32.36    3.30
  -9  -2  -3   29.51    9.73
 -10  -2  -3  126.68   16.49
 -13   3   3    7.58    3.37
 -13   3   3  -12.08    6.74
 -12   3   3  255.86   13.67
 -12   3   3  268.00   20.70
 -11   3   3  318.45   15.27
 -11   3   3  310.25   15.53
 -11   3   3  334.79   21.18
 -10   3   3  483.91   19.48
 -10   3   3  462.43   24.46
  -9   3   3   -4.09    4.63
  -9   3   3   -1.37    5.74
  -9   3   3    2.03    3.46
  -9   3   3    3.34    4.07
  -8   3   3  391.36   18.73
  -8   3   3  429.32   20.27
  -8   3   3  390.51   16.31
  -8   3   3  374.78   16.61
  -7   3   3   13.03    5.64
  -7   3   3   15.92    4.08
  -7   3   3   15.75    4.91
  -7   3   3   20.64    4.63
  -6   3   3  898.84   29.92
  -6   3   3  916.00   30.41
   5  -3  -3  100.11    8.04
  -5   3   3   86.07    7.25
  -5   3   3   87.32    7.29
   4  -3  -3   23.45    4.89
   4  -3  -3   26.31    4.26
  -4   3   3   19.38    4.21
  -4   3   3   20.31    5.17
   3  -3  -3 4580.60  130.07
   3  -3  -3 4821.51  132.27
  -3   3   3 4767.17  130.06
  -3   3   3 4588.39  131.94
   2  -3  -3  529.85   17.85
   2  -3  -3  494.08   15.58
  -2   3   3  524.55   17.76
  -2   3   3  525.97   15.66
   1  -3  -3 1882.31   53.86
   1  -3  -3 1955.18   55.47
  -1   3   3 1889.95   55.30
  -1   3   3 1896.00   54.13
   0  -3  -3  167.75    8.24
   0  -3  -3  168.15    8.06
   0   3   3  163.61    8.53
  -1  -3  -3   69.83    7.76
  -1  -3  -3   59.22    5.58
   1   3   3   54.21    6.55
   1   3   3   67.06    5.44
  -2  -3  -3    3.88    2.71
   2   3   3   11.15    4.88
   2   3   3    0.92    2.30
  -3  -3  -3  106.75    5.88
  -3  -3  -3  113.36    9.77
   3   3   3   84.89    9.11
   3   3   3   94.23    5.61
  -4  -3  -3   22.48    6.61
  -4  -3  -3   30.47    3.71
   4   3   3   20.92    3.00
  -5  -3  -3  212.77    9.14
  -5  -3  -3  227.16   14.60
  -5  -3  -3  220.11   15.52
   5   3   3  198.79    8.69
  -6  -3  -3   39.09    4.22
  -6  -3  -3   34.08    8.57
   6   3   3   33.18    3.70
  -7  -3  -3   75.75    5.39
  -7  -3  -3   96.52   13.13
   7   3   3   67.73    4.87
  -8  -3  -3  130.05    6.40
  -8  -3  -3  127.92    6.47
  -8  -3  -3  132.54   15.85
  -9  -3  -3   55.84   12.10
 -13   4   3    8.38    3.71
 -13   4   3   -0.50    8.28
 -12   4   3  203.93   17.85
 -12   4   3  212.71   14.03
 -11   4   3   63.29    7.36
 -11   4   3   72.69   11.98
 -11   4   3   79.13    8.49
 -10   4   3  523.79   24.73
 -10   4   3  522.63   20.70
 -10   4   3  495.29   20.88
 -10   4   3  481.54   23.50
  -9   4   3  286.09   14.56
  -9   4   3  307.13   16.33
  -9   4   3  325.51   17.83
  -9   4   3  283.58   14.08
  -8   4   3 1457.73   48.20
  -8   4   3 1436.65   45.96
  -8   4   3 1460.06   46.33
  -8   4   3 1466.01   47.45
   7  -4  -3  664.30   24.17
  -7   4   3  684.20   24.94
  -7   4   3  625.09   23.72
  -7   4   3  649.95   23.79
   6  -4  -3  951.67   31.87
  -6   4   3  971.44   31.71
  -6   4   3  959.48   30.95
  -6   4   3  940.99   31.46
   5  -4  -3 1035.44   33.34
  -5   4   3  996.88   31.41
  -5   4   3 1001.49   33.03
  -5   4   3 1040.32   32.01
   4  -4  -3  400.04   16.01
  -4   4   3  414.77   16.10
  -4   4   3  385.97   13.48
  -3   4   3 2025.66   59.93
   2  -4  -3  178.20    9.84
  -2   4   3  190.50   10.04
   1  -4  -3   30.25    4.75
   1  -4  -3   38.09    4.75
  -1   4   3   33.39    4.74
  -1   4   3   35.31    4.43
   0  -4  -3 2169.77   64.64
   0  -4  -3 2248.96   65.11
   0   4   3 2286.45   65.22
   0   4   3 2244.84   64.99
  -1  -4  -3   61.37    7.09
  -1  -4  -3   54.62    5.56
   1   4   3   59.07    7.37
   1   4   3   65.42    5.77
  -2  -4  -3  394.22   14.82
  -2  -4  -3  411.31   17.41
   2   4   3  415.79   14.86
  -3  -4  -3   92.31    6.43
  -3  -4  -3  109.13   10.20
   3   4   3  102.66    6.42
  -4  -4  -3    3.50    5.69
  -4  -4  -3    2.61    2.97
  -4  -4  -3   -0.54    4.33
   4   4   3    1.07    2.47
  -5  -4  -3   62.71    5.91
  -5  -4  -3   69.66   10.08
  -5  -4  -3   52.30    9.66
   5   4   3   61.86    7.04
  -6  -4  -3  400.45   22.37
  -6  -4  -3  392.43   15.74
  -7  -4  -3  505.45   18.04
  -7  -4  -3  512.98   26.82
   7   4   3  471.00   19.08
  -8  -4  -3   72.93   13.13
  -8  -4  -3   60.77    5.19
  -9  -4  -3  258.58   21.84
 -14   5   3    1.05    7.92
 -14   5   3   13.95    4.16
 -13   5   3   -1.08    3.14
 -13   5   3    2.36    7.79
 -12   5   3    9.00    7.47
 -12   5   3   13.97    4.50
 -11   5   3   88.04    8.64
 -11   5   3   80.21   11.71
 -10   5   3  308.18   17.46
 -10   5   3  286.88   14.40
 -10   5   3  264.58   15.77
 -10   5   3  258.12   14.31
  -9   5   3   74.48    9.34
  -9   5   3   67.75    8.65
  -9   5   3   48.57    6.57
   8  -5  -3  730.33   26.65
  -8   5   3  681.35   26.55
  -8   5   3  700.78   25.87
  -8   5   3  695.02   25.90
   7  -5  -3  202.49   11.85
  -7   5   3  187.19   10.70
  -7   5   3  199.05   11.28
  -7   5   3  183.03   11.06
   6  -5  -3   60.31    6.76
  -6   5   3   67.80    5.96
  -6   5   3   69.48    7.26
  -6   5   3   52.07    6.14
   5  -5  -3 1722.09   53.60
  -5   5   3 1699.47   53.29
  -5   5   3 1765.52   50.36
  -5   5   3 1797.67   50.74
   4  -5  -3   83.73    7.60
  -4   5   3   76.09    7.22
   3  -5  -3  344.34   14.72
  -3   5   3  336.25   14.49
   2  -5  -3 2557.25   76.34
  -2   5   3 2662.39   76.33
   1  -5  -3 2189.64   68.37
   1  -5  -3 2463.38   70.98
  -1   5   3 2612.33   71.16
   0  -5  -3  360.31   15.02
   0  -5  -3  380.56   14.73
   0   5   3  424.75   15.44
  -1  -5  -3   92.24    8.61
  -1  -5  -3   87.13    6.79
   1   5   3   63.24    5.69
  -2  -5  -3  145.80   10.63
  -2  -5  -3  150.15    8.79
   2   5   3  154.17    8.53
  -3  -5  -3   15.88    6.28
  -3  -5  -3   16.58    5.80
  -3  -5  -3   17.91    4.17
   3   5   3   15.80    3.71
  -4  -5  -3   -2.60    3.16
  -4  -5  -3    2.39    4.73
  -4  -5  -3    0.40    6.22
   4   5   3   -2.70    2.49
  -5  -5  -3  119.19   13.31
  -5  -5  -3  111.16    7.93
   5   5   3  101.26    7.22
  -6  -5  -3   92.46   12.41
  -6  -5  -3   93.54    7.32
   6   5   3   88.99    6.45
  -7  -5  -3  124.86   15.41
  -7  -5  -3  131.88    8.19
   7   5   3  145.46    7.60
  -8  -5  -3   18.68    3.73
  -8  -5  -3   34.25   10.81
 -14   6   3    7.22    3.84
 -14   6   3   -0.09    7.31
 -13   6   3    6.88    4.03
 -13   6   3    5.04    7.27
 -12   6   3   17.61    5.01
 -12   6   3   14.26    7.24
 -11   6   3   15.81    6.75
 -11   6   3   21.68    5.32
 -10   6   3   -7.48    3.71
 -10   6   3    1.68    3.90
 -10   6   3   -1.15    4.35
 -10   6   3    2.59    5.16
   9  -6  -3   50.34    7.93
  -9   6   3   48.18    8.05
  -9   6   3   42.65    6.97
  -9   6   3   55.26    7.41
   8  -6  -3 1850.31   59.16
  -8   6   3 1880.79   57.87
  -8   6   3 1906.74   57.56
   7  -6  -3  421.34   18.68
  -7   6   3  418.21   16.13
  -7   6   3  422.76   16.56
  -7   6   3  420.12   18.23
   6  -6  -3  110.89    9.42
  -6   6   3  108.34    6.37
  -6   6   3  116.41    6.78
  -6   6   3  105.97    8.91
   5  -6  -3    5.79    4.20
  -5   6   3   -1.62    3.22
   4  -6  -3    6.58    3.77
  -4   6   3    0.35    3.28
   3  -6  -3   34.16    5.50
  -3   6   3   34.24    5.44
   2  -6  -3    4.47    3.49
  -2   6   3   -0.76    3.14
   1  -6  -3 1074.77   31.35
   1  -6  -3 1009.61   33.69
   1  -6  -3 1005.44   31.34
  -1   6   3 1034.44   33.73
   0  -6  -3   43.51    5.34
   0  -6  -3   39.95    5.21
   0  -6  -3   33.02    5.46
   0   6   3   30.00    4.95
  -1  -6  -3  334.54   14.98
  -1  -6  -3  378.20   16.01
  -1  -6  -3  352.40   15.52
  -2  -6  -3   16.68    5.16
  -2  -6  -3   11.25    4.23
  -2  -6  -3   14.35    6.85
   2   6   3   16.98    4.22
  -3  -6  -3   69.27    8.91
  -3  -6  -3   65.60    7.41
  -3  -6  -3   72.16    9.37
   3   6   3   69.48    6.89
  -4  -6  -3    8.27    5.50
  -4  -6  -3    0.18    6.06
  -4  -6  -3    6.83    4.11
   4   6   3   12.25    3.52
  -5  -6  -3   76.57   11.48
  -5  -6  -3   76.62    7.57
   5   6   3   85.43    6.94
  -6  -6  -3   68.06    7.33
  -6  -6  -3   91.02   12.72
   6   6   3   85.51    6.63
  -7  -6  -3  137.93    9.16
   7   6   3  145.44    9.02
 -14   7   3   56.38    7.64
 -14   7   3   43.96   13.44
 -13   7   3   37.72    9.25
 -13   7   3   26.60    6.34
 -12   7   3    6.98    4.44
 -12   7   3    0.67    5.87
 -11   7   3    1.47    5.44
 -11   7   3    9.72    4.85
 -11   7   3   29.41    5.95
  10  -7  -3  797.03   30.95
 -10   7   3  795.15   29.69
 -10   7   3  787.85   29.80
   9  -7  -3  182.95   12.92
  -9   7   3  164.89   13.20
  -9   7   3  157.34   11.06
  -9   7   3  167.82   10.74
   8  -7  -3  189.35   12.86
  -8   7   3  163.98   12.00
  -8   7   3  187.21   10.29
  -8   7   3  185.61   10.49
   7  -7  -3  713.48   27.01
  -7   7   3  686.08   22.29
  -7   7   3  687.44   26.20
  -7   7   3  669.50   22.10
   6  -7  -3  156.10   11.02
  -6   7   3  137.85   11.56
   5  -7  -3    3.57    4.24
  -5   7   3    9.50    4.12
   4  -7  -3 2818.21   83.00
  -4   7   3 2728.70   82.57
   3  -7  -3  288.46   14.15
  -3   7   3  269.44   13.61
   2  -7  -3  599.36   23.16
  -2   7   3  629.22   23.17
   1  -7  -3  202.56    9.31
   1  -7  -3  197.20    9.31
   1  -7  -3  214.78   11.79
  -1   7   3  202.63   11.50
   0  -7  -3 1167.49   37.18
   0  -7  -3 1210.98   38.78
   0  -7  -3 1152.34   37.35
   0   7   3 1155.66   38.27
  -1  -7  -3    7.51    4.74
  -1  -7  -3   11.61    4.70
  -1  -7  -3    7.15    5.04
   1   7   3   13.52    4.05
  -2  -7  -3   11.52    6.16
  -2  -7  -3   12.53    4.85
  -2  -7  -3   15.99    5.56
   2   7   3   22.49    5.03
  -3  -7  -3  112.94   11.83
  -3  -7  -3  107.73    6.10
  -3  -7  -3   91.14    8.79
   3   7   3   96.81    8.26
  -4  -7  -3   -3.47    3.89
  -4  -7  -3   -0.12    6.18
   4   7   3    4.97    3.36
  -5  -7  -3   83.63   11.72
  -5  -7  -3   75.32    7.98
   5   7   3   71.35    6.97
  -6  -7  -3   13.73    4.70
  -6  -7  -3   26.83    8.89
  -7  -7  -3    0.25    8.47
  -7  -7  -3   10.46    4.16
 -14   8   3  372.01   19.39
 -14   8   3  336.71   21.44
 -13   8   3    7.35    4.99
 -13   8   3   -5.20    5.73
 -12   8   3  285.08   17.03
 -12   8   3  295.98   16.89
  11  -8  -3   15.13    6.03
 -11   8   3   30.98    5.70
 -11   8   3   10.24    5.94
  10  -8  -3    1.52    5.30
 -10   8   3    4.79    4.12
 -10   8   3   -6.55    4.31
   9  -8  -3  171.48   13.08
  -9   8   3  192.75   10.94
  -9   8   3  171.24   10.57
   8  -8  -3  191.59   17.25
  -8   8   3  178.15    8.84
  -8   8   3  174.44    8.70
   7  -8  -3   36.24    6.94
  -7   8   3   31.25    6.31
   6  -8  -3  139.41   11.44
  -6   8   3  136.05   10.70
   5  -8  -3   83.09    9.13
  -5   8   3   65.16    7.67
   4  -8  -3 1227.28   40.88
  -4   8   3 1180.25   40.29
   3  -8  -3 1304.46   43.41
  -3   8   3 1308.39   43.32
   2  -8  -3 2151.44   65.76
  -2   8   3 2094.65   68.12
   1  -8  -3    8.68    3.24
   1  -8  -3    6.97    3.64
   1  -8  -3    6.28    4.77
  -1   8   3    2.34    5.12
   0  -8  -3  149.74    9.54
   0  -8  -3  156.62   10.12
   0  -8  -3  167.85   11.44
   0   8   3  141.49   10.94
  -1  -8  -3   35.59    6.16
  -1  -8  -3   30.75    6.39
  -1  -8  -3   33.51    6.71
   1   8   3   25.72    5.47
  -2  -8  -3   25.56    7.07
  -2  -8  -3   33.49    6.65
  -2  -8  -3   23.70    5.58
   2   8   3   18.64    5.17
  -3  -8  -3   66.05    8.47
  -3  -8  -3   48.16    8.90
  -3  -8  -3   38.09    6.59
   3   8   3   48.96    6.45
  -4  -8  -3   26.95    7.98
  -4  -8  -3   23.71    6.11
   4   8   3   31.76    5.00
  -5  -8  -3  127.08   10.37
  -5  -8  -3  115.06   14.29
   5   8   3  161.56    9.84
  -6  -8  -3   -0.60    7.48
  -6  -8  -3   13.19    6.36
 -13   9   3   30.50    7.38
 -13   9   3   39.80    7.78
 -12   9   3  260.70   15.10
  11  -9  -3  897.12   35.61
 -11   9   3  923.72   31.83
 -11   9   3  920.95   31.72
  10  -9  -3    0.00    4.95
 -10   9   3    9.39    3.84
   9  -9  -3  125.01   12.12
   8  -9  -3  105.87   11.18
   7  -9  -3  980.24   36.18
   6  -9  -3  170.37   12.64
   4  -9  -3   -2.93    4.62
   3  -9  -3    2.03    4.92
  -3   9   3    0.56    4.09
   2  -9  -3  204.89   13.52
  -2   9   3  210.33   13.09
   1  -9  -3 1844.65   59.31
   1  -9  -3 1887.83   54.96
   1  -9  -3 1786.89   54.91
  -1   9   3 1920.23   61.38
   0  -9  -3   21.15    6.44
   0  -9  -3   21.63    5.45
   0  -9  -3   22.86    4.95
  -1  -9  -3   -2.07    4.77
  -1  -9  -3    5.82    3.69
  -2  -9  -3    3.03    5.05
  -2  -9  -3    2.03    5.58
  -2  -9  -3   12.83    4.51
  -3  -9  -3  143.30   13.52
  -3  -9  -3  148.08   11.63
  -4  -9  -3    2.56    4.74
  -4  -9  -3    9.00    7.05
  -5  -9  -3   12.07    4.99
  -5  -9  -3    1.86    7.60
 -13  10   3  148.42   11.97
  12 -10  -3   -9.13    5.74
 -12  10   3   -7.48    4.03
  11 -10  -3  518.91   25.55
 -11  10   3  555.61   19.75
  10 -10  -3   51.64    8.99
   9 -10  -3  164.93   13.91
   8 -10  -3  366.75   19.75
   7 -10  -3  529.54   24.14
   6 -10  -3  146.90   12.17
   5 -10  -3   14.71    5.90
   4 -10  -3   33.30    7.55
   3 -10  -3   37.24    7.40
   2 -10  -3   76.62    9.16
   1 -10  -3  877.18   27.71
   1 -10  -3  839.38   32.41
   1 -10  -3  821.12   27.29
   0 -10  -3    4.77    4.41
   0 -10  -3   11.48    3.76
   0 -10  -3   11.25    5.74
  -1 -10  -3    1.77    5.13
  -1 -10  -3    1.15    4.55
  -2 -10  -3   37.55    8.01
  -2 -10  -3   38.38    7.79
  -3 -10  -3   21.67    6.36
  -3 -10  -3    6.21    6.78
  -4 -10  -3   36.73    7.51
  -4 -10  -3   25.83    8.96
  12 -11  -3    1.78    6.12
  11 -11  -3   45.15   11.00
  10 -11  -3   -2.38    4.89
   9 -11  -3  513.61   25.18
   8 -11  -3  475.47   23.62
   7 -11  -3  160.67   13.84
   6 -11  -3  138.45   12.71
   5 -11  -3  154.59   13.31
   4 -11  -3   -0.84    5.56
   3 -11  -3   38.94    7.83
   2 -11  -3   -1.56    5.06
   1 -11  -3 1215.01   43.92
   1 -11  -3 1199.89   37.70
   1 -11  -3 1253.15   38.03
   0 -11  -3   74.33    8.29
   0 -11  -3   96.48   11.11
  -1 -11  -3 1049.89   37.92
  -1 -11  -3 1051.25   40.21
  -1 -11  -3 1203.88   41.92
  -2 -11  -3   41.20    8.35
  -2 -11  -3   42.09    8.30
  -3 -11  -3   26.88    7.55
  -3 -11  -3   12.25    7.67
  11 -12  -3   11.20    7.56
  10 -12  -3  378.40   22.16
   9 -12  -3  548.80   28.56
   8 -12  -3  153.02   14.66
   7 -12  -3   -7.42    5.39
   6 -12  -3    0.80    5.52
   5 -12  -3  167.78   14.45
   4 -12  -3  127.81   12.98
   3 -12  -3   20.20    7.45
   2 -12  -3   87.10   11.49
   1 -12  -3  108.53   12.66
   0 -12  -3   37.13    6.09
   0 -12  -3   23.70    7.79
  -1 -12  -3   94.50   16.86
  -1 -12  -3   83.30    9.64
  -2 -12  -3   42.13    8.63
  -2 -12  -3   40.56    8.30
   9 -13  -3  115.79   14.26
   8 -13  -3   71.06   11.82
   7 -13  -3   -1.01    6.63
   6 -13  -3  141.08   15.43
   5 -13  -3  133.59   14.29
   4 -13  -3   44.02    9.53
   3 -13  -3  105.72   12.90
   2 -13  -3   65.78   10.53
   1 -13  -3    6.12    7.02
   0 -13  -3   -1.99    6.47
  -1 -14   4   -3.89    5.69
   0 -14   4  122.98   13.48
   1 -14   4  -10.99    6.45
   1 -14   4    0.55    4.25
   2 -14   4  259.92   18.82
   2 -14   4  236.49   12.62
   3 -14   4  205.13   17.08
   4 -14   4   75.05   11.25
   5 -14   4   13.42    8.50
   6 -14   4   22.04    8.26
   7 -14   4  805.01   34.63
   8 -14   4  136.35   15.01
   9 -14   4  259.20   18.98
  10 -14   4  146.45   14.86
  11 -14   4   24.81    8.41
  -2 -13   4   21.91    7.54
  -2 -13   4   14.68   12.69
  -1 -13   4  161.34   13.27
  -1 -13   4  168.43   16.03
   0 -13   4  230.12   17.99
   0 -13   4  219.17   14.52
   0 -13   4  283.53   13.12
   1 -13   4   13.20    5.26
   2 -13   4  140.26    9.93
   2 -13   4  133.15   14.14
   2 -13   4  144.06    8.96
   3 -13   4   86.59    7.31
   3 -13   4   95.20   11.74
   3 -13   4   80.58    6.49
   4 -13   4   71.74   10.80
   5 -13   4   38.31    8.92
   6 -13   4  118.06   13.52
   7 -13   4   23.49    8.35
   8 -13   4  965.75   38.11
   9 -13   4  227.94   16.88
  10 -13   4    2.89    6.28
  11 -13   4    4.36    6.62
  12 -13   4   10.76    7.00
  -4 -12   4   -4.39    6.67
  -4 -12   4   -8.59    6.34
  -3 -12   4   17.14    7.95
  -3 -12   4   11.94    7.28
  -2 -12   4    3.14    5.96
  -1 -12   4   28.11    8.46
  -1 -12   4   41.50    9.55
   0 -12   4  725.72   31.05
   0 -12   4  736.22   29.06
   0 -12   4  753.23   27.58
   1 -12   4   -0.24    6.61
   1 -12   4   -3.02    4.29
   1 -12   4    5.01    3.34
   2 -12   4  321.38   14.15
   2 -12   4  325.49   19.06
  -3  12  -4  135.81    9.80
   3 -12   4  137.78    8.50
   3 -12   4  162.18   13.65
  -4  12  -4    3.63    3.43
   4 -12   4    7.70    6.59
   4 -12   4   -2.63    2.85
   5 -12   4  766.47   31.23
   6 -12   4  195.87   15.08
   7 -12   4   18.24    6.70
  -8  12  -4   55.07    6.11
   8 -12   4   39.33    8.43
  -9  12  -4   14.62    4.29
   9 -12   4   11.94    6.47
 -10  12  -4  381.60   15.20
 -10  12  -4  351.24   15.72
  10 -12   4  308.24   19.03
 -11  12  -4   24.71    5.43
  11 -12   4   10.20    6.12
 -12  12  -4  130.28   11.39
  12 -12   4  126.95   12.84
  -5 -11   4    1.60    5.86
  -5 -11   4   -4.34    6.89
  -4 -11   4   58.92   10.70
  -3 -11   4  100.09   11.54
  -3 -11   4  103.77   13.38
  -2 -11   4  115.66   12.55
  -2 -11   4  102.76   11.91
  -1 -11   4  158.05   13.30
  -1 -11   4  165.75   13.73
  -1 -11   4  190.05   12.17
   0 -11   4   37.04    5.98
   0 -11   4   28.64    7.66
  -1  11  -4  362.83   17.34
   1 -11   4  344.13   15.49
   1 -11   4  368.90   19.23
  -2  11  -4   25.97    5.84
   2 -11   4   43.71    5.94
   2 -11   4   44.95    8.43
  -3  11  -4 2064.37   60.86
   3 -11   4 2008.46   59.92
   3 -11   4 2038.02   65.46
  -4  11  -4    5.86    3.73
   4 -11   4    2.66    3.36
   4 -11   4    5.27    5.72
  -5  11  -4  476.08   17.35
   5 -11   4  497.67   17.13
   5 -11   4  464.71   22.07
  -6  11  -4 1483.13   44.73
   6 -11   4 1528.11   50.50
   6 -11   4 1449.11   44.68
  -7  11  -4   15.31    4.46
   7 -11   4    8.60    6.08
   7 -11   4   14.02    4.01
  -8  11  -4   59.25    7.16
   8 -11   4   50.73    6.60
   8 -11   4   45.22    7.99
  -9  11  -4  280.28   14.04
   9 -11   4  279.07   16.69
 -10  11  -4   53.09    7.61
  10 -11   4   41.36    7.97
 -11  11  -4  195.95   13.28
  11 -11   4  179.91   13.83
 -12  11  -4    3.55    5.54
  12 -11   4   -3.01    4.67
 -13  11  -4    6.22    6.91
  13 -11   4   -2.21    5.59
  -6 -10   4   -5.12    7.28
  -6 -10   4   -3.62    6.36
  -5 -10   4   57.24   11.42
  -5 -10   4   77.08   10.51
  -4 -10   4  128.81   15.07
  -4 -10   4  139.06   13.31
  -3 -10   4    4.62    5.90
  -3 -10   4    8.16    6.89
  -2 -10   4  230.13   13.81
  -2 -10   4  198.19   15.11
  -2 -10   4  209.79   14.83
  -1 -10   4   92.63   10.86
  -1 -10   4  103.02    9.68
   0  10  -4   40.39    7.58
   0 -10   4   61.61    9.22
   0 -10   4   57.44    7.36
  -1  10  -4  255.44   13.85
   1 -10   4  254.05   12.71
   1 -10   4  251.06   15.17
  -2  10  -4   76.94    9.64
   2 -10   4   68.23    7.23
   2 -10   4   77.96   11.26
  -3  10  -4  728.62   24.80
   3 -10   4  705.48   29.79
   3 -10   4  727.76   24.10
  -4  10  -4  277.30   15.57
  -4  10  -4  320.56   13.18
   4 -10   4  305.48   16.45
   4 -10   4  296.33   12.45
  -5  10  -4  478.60   17.81
  -5  10  -4  472.64   20.54
   5 -10   4  475.22   21.58
   5 -10   4  494.47   17.56
  -6  10  -4  185.43   12.23
  -6  10  -4  184.24   10.12
   6 -10   4  174.12    9.67
   6 -10   4  161.93   12.82
  -7  10  -4  821.17   32.08
  -7  10  -4  825.04   28.55
   7 -10   4  746.79   27.04
   7 -10   4  766.16   29.90
  -8  10  -4   27.32    5.74
   8 -10   4   26.60    5.68
   8 -10   4   13.07    7.73
  -9  10  -4  172.90   11.95
   9 -10   4  185.30   14.23
   9 -10   4  173.18   11.61
 -10  10  -4  117.37   11.19
  10 -10   4  131.69   11.27
 -11  10  -4  691.49   32.77
  11 -10   4  790.37   29.58
 -12  10  -4  179.87   14.92
  12 -10   4  246.88   14.33
 -13  10  -4    2.54    7.03
  -7  -9   4   62.53    9.36
  -6  -9   4   55.22    9.10
  -5  -9   4  303.75   17.58
  -5  -9   4  316.81   21.72
  -4  -9   4  114.76   11.63
  -4  -9   4  114.69   13.69
  -3  -9   4   97.95   11.10
  -2  -9   4   74.47    8.44
  -2  -9   4   74.75    9.54
   1   9  -4  479.83   21.67
  -1  -9   4  503.99   24.91
  -1  -9   4  496.91   20.81
   0   9  -4  154.43   10.84
   0   9  -4  149.27   11.39
   0  -9   4  155.57   10.38
   0  -9   4  135.11   11.44
  -1   9  -4  669.06   25.48
  -1   9  -4  663.14   24.33
   1  -9   4  641.67   23.38
   1  -9   4  660.38   25.83
  -2   9  -4   19.50    4.95
  -2   9  -4   26.90    5.59
   2  -9   4   33.44    6.60
   2  -9   4   31.85    5.13
  -3   9  -4  758.78   25.55
  -3   9  -4  772.10   27.86
   3  -9   4  760.46   28.29
   3  -9   4  752.76   24.94
  -4   9  -4   15.78    4.42
  -4   9  -4   13.91    4.78
   4  -9   4   17.22    4.16
   4  -9   4   10.93    5.15
  -5   9  -4  231.47   11.40
  -5   9  -4  222.61   15.30
   5  -9   4  248.58   13.91
   5  -9   4  246.95   11.28
  -6   9  -4 1549.84   54.69
  -6   9  -4 1694.04   50.36
   6  -9   4 1709.24   53.07
  -7   9  -4  104.48    9.42
  -7   9  -4   95.09    8.72
   7  -9   4   91.55    8.65
   7  -9   4  114.50   10.26
  -8   9  -4   27.50    6.34
  -8   9  -4   25.68    5.35
   8  -9   4   18.07    5.48
   8  -9   4   17.82    6.01
  -9   9  -4  578.36   23.08
  -9   9  -4  615.63   24.49
   9  -9   4  610.19   24.18
   9  -9   4  597.79   24.87
 -10   9  -4  201.61   11.83
 -10   9  -4  228.10   14.59
  10  -9   4  230.65   13.71
 -11   9  -4  142.36   13.06
 -11   9  -4  155.08    9.95
  11  -9   4  169.79   11.75
 -12   9  -4  249.88   16.96
 -13   9  -4  368.69   15.92
 -13   9  -4  357.57   21.59
  -8  -8   4  176.27   13.66
  -7  -8   4  126.01   16.66
  -7  -8   4  133.95   12.53
  -6  -8   4   40.90    7.69
  -6  -8   4   31.39    9.94
  -5  -8   4    4.46    6.94
  -5  -8   4    5.42    5.17
  -4  -8   4  337.14   20.16
  -4  -8   4  307.88   16.62
   3   8  -4  201.32   14.16
  -3  -8   4  223.76   14.16
  -3  -8   4  192.70   13.03
   2   8  -4  564.40   22.35
   2   8  -4  534.91   23.81
  -2  -8   4  552.89   22.82
   1   8  -4   60.76    7.35
   1   8  -4   47.26    7.57
  -1  -8   4   53.07    7.50
  -1  -8   4   53.79    7.56
   0   8  -4   46.17    6.62
   0   8  -4   41.68    6.77
   0  -8   4   61.91    7.16
   0  -8   4   50.44    6.99
  -1   8  -4   97.93    8.10
  -1   8  -4   78.19    9.43
   1  -8   4   87.61    7.45
   1  -8   4   81.93    8.68
  -2   8  -4   91.61    7.52
   2  -8   4  105.85    9.26
   2  -8   4  109.21    7.51
  -3   8  -4  353.63   15.59
  -3   8  -4  351.00   14.29
   3  -8   4  373.79   16.39
   3  -8   4  356.83   13.89
  -4   8  -4  591.05   22.14
  -4   8  -4  618.23   20.92
   4  -8   4  582.57   22.69
   4  -8   4  595.47   20.54
  -5   8  -4  294.52   13.07
  -5   8  -4  288.89   13.79
   5  -8   4  290.27   14.58
   5  -8   4  297.92   13.00
  -6   8  -4  256.53   12.88
  -6   8  -4  262.92   12.79
   6  -8   4  247.69   12.56
   6  -8   4  248.56   13.51
  -7   8  -4   98.85    9.54
  -7   8  -4   92.77    8.03
   7  -8   4  102.69    9.12
   7  -8   4   84.92    8.90
  -8   8  -4  209.28   13.11
  -8   8  -4  196.27   11.11
   8  -8   4  220.00   12.60
   8  -8   4  201.57   13.03
  -9   8  -4    2.21    5.50
  -9   8  -4   -1.93    3.07
   9  -8   4   -4.74    4.41
   9  -8   4    5.99    4.61
 -10   8  -4  379.04   19.69
 -10   8  -4  389.69   16.48
  10  -8   4  422.34   17.78
 -11   8  -4   28.59    7.80
 -11   8  -4   26.94    4.47
  11  -8   4   29.58    5.62
 -12   8  -4  149.66    9.37
 -12   8  -4  171.33   15.33
  -9  -7   4   88.74   10.06
  -8  -7   4  171.04   18.67
  -8  -7   4  190.10   13.20
  -7  -7   4   65.97    8.63
  -7  -7   4   59.79   12.66
  -6  -7   4  404.72   23.90
  -6  -7   4  370.62   18.43
  -5  -7   4  115.21   13.61
  -5  -7   4   93.97   10.81
   4   7  -4    4.34    4.10
  -4  -7   4    7.67    4.96
  -4  -7   4    3.47    5.07
   3   7  -4  429.38   20.97
   3   7  -4  425.87   18.27
  -3  -7   4  412.24   18.68
  -3  -7   4  431.59   19.96
   2   7  -4  584.15   22.54
   2   7  -4  585.45   24.33
  -2  -7   4  574.63   23.42
  -2  -7   4  619.95   23.28
   1   7  -4 1055.39   34.80
   1   7  -4  969.66   35.06
  -1  -7   4 1107.33   35.44
   0   7  -4  471.47   19.36
   0   7  -4  507.33   19.47
   0  -7   4  522.96   20.03
   0  -7   4  511.18   19.27
  -1   7  -4  925.13   31.97
  -1   7  -4  950.40   31.44
   1  -7   4  993.55   31.19
   1  -7   4 1001.43   32.62
  -2   7  -4  874.12   29.42
  -2   7  -4  875.37   28.44
   2  -7   4  876.43   28.11
   2  -7   4  875.51   29.74
  -3   7  -4   23.01    4.06
  -3   7  -4   23.03    4.42
   3  -7   4   25.03    4.41
   3  -7   4   21.04    4.81
  -4   7  -4  719.95   24.98
  -4   7  -4  735.33   24.24
   4  -7   4  717.98   24.06
   4  -7   4  717.17   25.33
  -5   7  -4  313.68   13.71
  -5   7  -4  312.21   13.90
   5  -7   4  321.24   13.84
   5  -7   4  344.99   14.57
  -6   7  -4  753.96   25.45
  -6   7  -4  752.21   26.13
   6  -7   4  701.39   25.70
   6  -7   4  749.30   26.51
  -7   7  -4  628.47   21.84
  -7   7  -4  568.86   22.97
   7  -7   4  595.81   23.96
   7  -7   4  632.60   22.56
  -8   7  -4  516.40   19.21
  -8   7  -4  527.44   22.00
   8  -7   4  519.08   19.96
   8  -7   4  494.70   22.38
  -9   7  -4    4.14    5.65
  -9   7  -4    1.17    2.76
   9  -7   4    6.11    3.40
   9  -7   4    3.12    4.18
 -10   7  -4   76.25   10.50
 -10   7  -4   62.44    6.08
  10  -7   4   86.59    7.85
 -11   7  -4  946.58   31.61
 -11   7  -4  978.22   38.24
 -11   7  -4 1004.01   31.93
 -12   7  -4   51.03   10.81
 -12   7  -4   62.50    5.60
 -13   7  -4   11.09    8.55
  -9  -6   4  355.56   17.70
  -8  -6   4   -5.60    9.89
  -8  -6   4   -1.03    4.36
  -7  -6   4  217.53   18.83
  -7  -6   4  205.16   13.27
  -6  -6   4   46.09   10.25
  -6  -6   4   48.66    7.28
   5   6  -4   64.62    7.44
  -5  -6   4   68.99   14.99
  -5  -6   4   53.20    7.33
   4   6  -4   13.50    4.04
  -4  -6   4   10.31    5.59
  -4  -6   4    6.87    4.68
   3   6  -4  978.65   33.20
   3   6  -4  969.09   35.62
  -3  -6   4 1026.93   33.77
  -3  -6   4  983.29   34.96
   2   6  -4   -0.30    2.52
   2   6  -4   -2.67    4.22
  -2  -6   4   -3.12    3.37
  -2  -6   4   -0.58    4.11
   1   6  -4    7.09    4.37
   1   6  -4    9.51    3.04
  -1  -6   4    4.07    3.38
  -1  -6   4   13.30    4.09
   0   6  -4   68.94    7.34
   0   6  -4   73.29    6.49
   0  -6   4   66.77    7.37
   0  -6   4   72.59    7.14
  -1   6  -4  258.47   11.88
  -1   6  -4  257.60   11.81
   1  -6   4  249.00   12.21
   1  -6   4  243.06   11.40
  -2   6  -4  233.28   10.98
  -2   6  -4  227.12   10.77
   2  -6   4  230.84   10.79
   2  -6   4  227.97   11.46
  -3   6  -4    6.65    3.00
  -3   6  -4    6.57    4.04
   3  -6   4    7.52    3.76
   3  -6   4   16.62    4.02
  -4   6  -4  176.75    9.89
  -4   6  -4  171.31    9.04
   4  -6   4  167.92    9.54
   4  -6   4  182.90    9.53
  -5   6  -4    7.99    2.97
  -5   6  -4   11.90    4.25
   5  -6   4    9.76    3.80
   5  -6   4    6.12    4.01
  -6   6  -4    3.44    2.66
  -6   6  -4    4.63    4.29
   6  -6   4    1.58    4.06
   6  -6   4    3.86    3.38
  -7   6  -4  522.95   18.73
  -7   6  -4  521.44   21.58
   7  -6   4  542.85   19.44
  -8   6  -4    0.53    2.65
  -8   6  -4   -4.19    5.35
   8  -6   4   -2.92    3.33
   8  -6   4    2.36    5.45
  -9   6  -4  190.91    9.49
  -9   6  -4  193.93   14.58
   9  -6   4  204.41   14.68
   9  -6   4  209.41   10.53
 -10   6  -4    5.49    6.79
 -10   6  -4    6.49    2.86
 -10   6  -4    3.31    2.87
 -11   6  -4  213.00   16.98
 -11   6  -4  231.72   10.30
 -11   6  -4  224.31    9.90
 -12   6  -4  228.73    9.38
 -12   6  -4  241.05   19.02
 -13   6  -4  -13.46    6.66
 -10  -5   4   12.84    4.90
  -9  -5   4   15.74    5.41
  -9  -5   4    9.10    8.96
  -8  -5   4   74.55   13.51
  -8  -5   4   82.16    9.92
   7   5  -4   -0.26    2.77
  -7  -5   4   -0.85    4.43
  -7  -5   4    9.32    7.93
  -6  -5   4  111.25   13.68
  -6  -5   4  106.06    9.58
   5   5  -4 1864.83   56.51
  -5  -5   4 1799.20   56.71
  -5  -5   4 1830.30   60.26
   4   5  -4  902.24   33.28
   4   5  -4  854.98   29.61
  -4  -5   4  907.63   30.33
  -4  -5   4  837.51   32.19
   3   5  -4   30.61    4.57
   3   5  -4   28.66    6.19
  -3  -5   4   34.01    5.38
  -3  -5   4   31.33    6.34
   2   5  -4    1.97    4.05
   2   5  -4    0.97    2.50
  -2  -5   4    3.44    3.93
  -2  -5   4    2.95    3.67
   1   5  -4  138.17    8.27
   1   5  -4  141.99    9.98
  -1  -5   4  134.70    8.91
  -1  -5   4  132.38   10.61
   0   5  -4 2710.20   82.52
   0   5  -4 2882.00   82.40
   0  -5   4 2963.70   82.69
  -1   5  -4   93.38    8.08
  -1   5  -4   91.84    6.94
   1  -5   4  104.45    8.11
  -2   5  -4   77.76    7.79
  -2   5  -4   93.53    6.78
   2  -5   4   96.20    7.65
   2  -5   4   92.95    7.82
  -3   5  -4  614.16   21.50
  -3   5  -4  616.45   20.64
   3  -5   4  614.51   21.02
   3  -5   4  624.93   21.28
  -4   5  -4  105.26    8.38
  -4   5  -4  100.85    6.51
   4  -5   4  102.02    8.04
   4  -5   4   99.00    6.91
  -5   5  -4  247.69   12.35
  -5   5  -4  239.26   10.05
   5  -5   4  247.53   10.63
  -6   5  -4    6.87    4.51
  -6   5  -4    2.61    2.29
   6  -5   4    6.98    4.59
   6  -5   4    5.89    2.96
  -7   5  -4  376.55   13.86
  -7   5  -4  395.77   18.36
   7  -5   4  384.52   14.50
   7  -5   4  363.14   18.42
  -8   5  -4  611.75   25.50
  -8   5  -4  590.74   19.74
   8  -5   4  583.57   20.15
  -9   5  -4  277.23   17.29
  -9   5  -4  265.90   10.73
  -9   5  -4  264.07   10.67
 -10   5  -4  172.55   15.30
 -10   5  -4  172.16    7.67
 -10   5  -4  155.37    7.43
 -11   5  -4  366.91   12.51
 -11   5  -4  358.64   12.56
 -11   5  -4  374.97   22.45
 -11  -4   4   90.40    9.09
 -10  -4   4  189.05   12.25
 -10  -4   4  187.59   20.42
  -9  -4   4   24.12    6.27
  -9  -4   4   22.73   10.03
   8   4  -4   79.63    7.76
  -8  -4   4   71.71    8.49
  -8  -4   4   80.95   12.79
   7   4  -4    8.27    6.95
  -7  -4   4    3.53    7.35
  -7  -4   4   -4.46    3.38
  -6  -4   4   27.79    7.74
  -6  -4   4   20.84    8.09
  -6  -4   4   16.39    4.83
   5   4  -4 1446.95   48.76
   5   4  -4 1414.93   44.83
  -5  -4   4 1433.04   45.15
   4   4  -4   19.66    5.79
   4   4  -4   23.48    4.07
  -4  -4   4   29.84    6.67
  -4  -4   4   22.51    4.79
   3   4  -4  783.42   28.46
   3   4  -4  707.21   25.65
  -3  -4   4  827.24   28.37
  -3  -4   4  807.51   26.52
   2   4  -4  870.07   30.63
   2   4  -4  915.30   29.05
  -2  -4   4  883.43   30.37
  -2  -4   4  919.95   29.39
   1   4  -4 2277.53   67.79
   1   4  -4 2199.46   70.73
  -1  -4   4 2345.96   67.57
  -1  -4   4 2348.16   67.08
   0   4  -4 2213.62   63.40
   0   4  -4 2133.43   62.69
   0  -4   4 2147.26   62.87
   0  -4   4 2151.15   62.98
  -1   4  -4 6458.02  181.13
   1  -4   4 6540.02  180.99
  -2   4  -4  560.27   18.43
  -2   4  -4  564.86   19.29
   2  -4   4  550.29   18.53
  -3   4  -4  167.05    7.77
  -3   4  -4  174.40   10.20
   3  -4   4  166.15    8.29
  -4   4  -4  776.61   26.81
  -4   4  -4  789.70   24.54
   4  -4   4  807.46   24.79
   4  -4   4  806.19   27.23
  -5   4  -4  238.46   12.48
  -5   4  -4  214.59    8.66
   5  -4   4  214.05    9.03
   5  -4   4  217.94   12.26
  -6   4  -4 1215.34   39.65
  -6   4  -4 1155.70   34.94
   6  -4   4 1207.66   35.32
   6  -4   4 1162.79   40.13
  -7   4  -4  393.06   19.06
  -7   4  -4  386.05   13.32
   7  -4   4  406.87   13.83
   7  -4   4  380.34   19.22
  -8   4  -4    6.74    2.20
  -8   4  -4    6.00    2.15
  -8   4  -4   11.95    6.89
   8  -4   4   -3.03    5.47
  -9   4  -4  537.77   17.09
  -9   4  -4  548.62   25.79
  -9   4  -4  541.15   17.15
 -10   4  -4    1.55    1.52
 -10   4  -4   -0.43    1.36
 -10   4  -4   -2.91    6.25
 -11   4  -4   70.56   12.27
 -12   4  -4  474.20   27.54
 -11  -3   4   36.93    6.17
 -10  -3   4   16.44    4.91
 -10  -3   4    4.36    8.07
   9   3  -4  155.88   10.64
  -9  -3   4  186.53   11.59
  -9  -3   4  164.89   17.38
   8   3  -4  377.81   19.27
  -8  -3   4  413.99   24.26
  -8  -3   4  394.89   17.48
   7   3  -4  116.29    8.39
  -7  -3   4  106.30    9.16
  -7  -3   4  103.88   13.66
  -6  -3   4  153.08   12.75
  -6  -3   4  148.45    9.91
   5   3  -4  103.98   10.47
   5   3  -4   93.26    6.92
  -5  -3   4   88.27    9.65
  -5  -3   4   86.81    7.50
   4   3  -4   -3.98    4.11
   4   3  -4    0.13    2.49
  -4  -3   4   -0.73    3.13
  -4  -3   4   -2.35    3.60
   3   3  -4  386.92   14.33
   3   3  -4  345.89   16.26
  -3  -3   4  361.48   14.47
  -3  -3   4  345.81   16.04
   2   3  -4    9.99    4.87
   2   3  -4   12.63    3.43
  -2  -3   4   10.26    3.70
  -2  -3   4    5.67    4.51
   1   3  -4  308.43   12.85
   1   3  -4  303.65   11.60
  -1  -3   4  305.32   11.93
  -1  -3   4  293.07   12.46
   0   3  -4 1359.15   40.57
   0   3  -4 1378.30   40.03
   0  -3   4 1365.16   40.07
   0  -3   4 1316.39   40.37
  -1   3  -4 5108.86  141.85
   1  -3   4 5010.15  141.13
   1  -3   4 5089.51  141.75
  -2   3  -4 2529.01   71.61
  -2   3  -4 2550.40   72.96
   2  -3   4 2538.83   71.67
   2  -3   4 2536.07   72.86
  -3   3  -4   31.34    3.48
  -3   3  -4   38.93    5.48
   3  -3   4   34.83    3.55
   3  -3   4   37.09    5.44
  -4   3  -4 5219.72  147.53
  -4   3  -4 4994.55  151.04
   4  -3   4 5783.73  152.24
   4  -3   4 5342.52  147.72
  -5   3  -4    1.95    4.41
  -5   3  -4    0.69    1.45
   5  -3   4    0.45    1.83
   5  -3   4    2.13    4.49
  -6   3  -4  230.91   13.58
  -6   3  -4  212.91    7.68
   6  -3   4  217.49   13.64
  -7   3  -4  193.56    6.92
  -7   3  -4  186.68    6.84
  -7   3  -4  200.54   14.32
   7  -3   4  186.47   13.80
  -8   3  -4  257.33   17.11
  -8   3  -4  256.50    8.42
  -8   3  -4  262.92    8.51
   8  -3   4  246.55   17.04
  -9   3  -4  285.79   19.12
 -10   3  -4   74.20   12.34
 -11   3  -4  401.88   25.06
 -12   3  -4  881.99   40.32
 -12  -2   4   17.14    4.47
 -11  -2   4  -10.00    7.46
 -11  -2   4    6.90    4.22
 -10  -2   4   19.89    9.35
 -10  -2   4   13.67    5.51
 -10  -2   4   23.18    5.32
  -9  -2   4   52.06   11.56
  -9  -2   4   74.14    8.18
   8   2  -4  218.89   11.85
  -8  -2   4  213.84   17.87
  -8  -2   4  232.63   12.40
   7   2  -4  144.33    9.25
  -7  -2   4  147.49   14.29
  -7  -2   4  149.06    9.86
  -7  -2   4  156.81   13.19
  -6  -2   4   27.94    4.71
  -6  -2   4   35.56    7.06
   5   2  -4   -0.75    2.22
   5   2  -4    5.34    4.75
  -5  -2   4    3.10    2.85
  -5  -2   4    0.25    4.09
   4   2  -4  344.29   13.41
   4   2  -4  333.05   16.28
  -4  -2   4  326.34   15.74
  -4  -2   4  349.17   13.81
   3   2  -4    1.23    2.80
   3   2  -4    2.75    5.36
  -3  -2   4    2.41    3.04
  -3  -2   4   -1.32    4.64
   2   2  -4 1513.95   47.05
   2   2  -4 1569.15   45.71
  -2  -2   4 1551.39   46.99
  -2  -2   4 1580.88   45.88
   1   2  -4   60.89    5.58
   1   2  -4   64.46    4.43
  -1  -2   4   61.63    4.65
  -1  -2   4   69.06    5.67
   0  -2   4 9897.16  273.49
  -1   2  -4 1481.72   42.52
  -1   2  -4 1502.66   43.94
   1  -2   4 1493.68   43.78
   1  -2   4 1471.85   42.57
  -2   2  -4  713.85   20.67
  -2   2  -4  702.59   22.86
   2  -2   4  688.97   20.65
   2  -2   4  694.51   22.92
  -3   2  -4 1016.28   29.25
  -3   2  -4 1070.46   33.09
   3  -2   4  996.47   29.31
   3  -2   4 1039.38   33.30
  -4   2  -4 2387.70   72.50
  -4   2  -4 2412.62   67.53
   4  -2   4 2482.90   73.18
   4  -2   4 2483.90   67.62
  -5   2  -4  776.45   28.14
   5  -2   4  740.48   28.22
  -6   2  -4   29.11    6.83
   6  -2   4   16.64    5.89
  -7   2  -4   42.49    8.51
   7  -2   4   38.12    8.03
  -9   2  -4  363.30   21.87
 -10   2  -4  499.65   27.14
 -11   2  -4   -4.13    7.68
 -12  -1   4    4.36    3.61
 -11  -1   4   -5.76    7.40
 -10  -1   4  284.14   14.33
 -10  -1   4  257.76   14.14
 -10  -1   4  304.12   21.84
  -9  -1   4   11.32    4.47
  -9  -1   4   21.11    8.93
  -8  -1   4  277.19   14.38
  -8  -1   4  293.88   13.89
  -8  -1   4  306.55   19.99
  -7  -1   4 1088.91   36.88
  -7  -1   4 1172.71   41.21
  -7  -1   4 1194.82   42.84
   6   1  -4  629.32   21.51
  -6  -1   4  603.95   24.55
  -6  -1   4  589.12   21.52
   5   1  -4    1.32    2.48
   5   1  -4   -0.77    4.15
  -5  -1   4   -0.76    2.58
  -5  -1   4    0.47    4.07
   4   1  -4 1292.87   40.57
  -4  -1   4 1227.08   40.11
  -4  -1   4 1209.83   38.00
   3   1  -4  328.30   14.47
   3   1  -4  343.39   12.70
  -3  -1   4  341.24   12.90
  -3  -1   4  332.97   14.27
   2   1  -4  131.32    7.71
   2   1  -4  137.69    6.50
  -2  -1   4  129.77    7.45
  -2  -1   4  132.84    6.63
   1   1  -4   39.04    3.46
   1   1  -4   31.54    3.95
  -1  -1   4   40.61    3.85
  -1  -1   4   45.06    4.90
   0   1  -4  252.32   10.00
   0   1  -4  251.16    8.54
   0  -1   4  248.31    9.96
   0  -1   4  207.32    8.39
  -1   1  -4  301.28    9.57
  -1   1  -4  293.96   11.55
   1  -1   4  299.74   11.55
   1  -1   4  301.64    9.70
  -2   1  -4  363.09   13.88
  -2   1  -4  347.67   10.58
   2  -1   4  353.99   10.64
   2  -1   4  369.19   14.21
  -3   1  -4  187.26   11.18
   3  -1   4  193.02   11.60
  -4   1  -4  137.99   10.91
   4  -1   4  109.81   10.15
  -5   1  -4 1508.51   48.81
   5  -1   4 1496.16   49.19
  -6   1  -4   59.90    8.76
   6  -1   4   55.24    8.34
  -7   1  -4   94.64   11.81
   7  -1   4  104.55   12.31
  -8   1  -4   18.13    7.58
  -9   1  -4  345.31   21.88
 -10   1  -4  141.07   16.46
 -11   1  -4  -15.15    7.28
 -12   0   4   65.23   13.52
 -12   0   4   51.21    6.88
 -11   0   4    4.90    3.59
 -11   0   4    1.19    7.59
 -10   0   4  186.03   11.12
 -10   0   4  166.23   17.05
 -10   0   4  166.06   11.36
  -9   0   4  757.67   28.80
  -9   0   4  832.24   35.50
  -9   0   4  844.56   28.93
  -8   0   4    2.17    6.38
  -8   0   4    6.02    5.42
  -8   0   4    0.14    3.15
  -8   0   4    2.77    4.09
  -7   0   4  251.48   15.02
  -7   0   4  246.86   12.07
  -7   0   4  261.70   12.85
  -7   0   4  264.48   16.73
   6   0  -4  198.55   12.62
  -6   0   4  206.41   10.73
  -6   0   4  198.96   12.32
  -6   0   4  199.21   10.14
   5   0  -4  553.73   21.87
  -5   0   4  558.22   19.58
  -5   0   4  547.26   21.59
   4   0  -4   14.18    3.78
   4   0  -4   16.36    5.49
  -4   0   4    7.31    5.66
  -4   0   4   13.14    3.84
   3   0  -4  533.63   17.81
   3   0  -4  530.98   18.86
  -3   0   4  541.03   17.93
  -3   0   4  519.71   18.72
   1   0  -4 5911.22  160.83
  -1   0   4 5655.88  160.67
   0   0  -4 1904.96   54.81
   0   0   4 1902.13   54.71
   0   0   4 1898.69   53.71
  -1   0  -4  510.62   16.92
   1   0   4  480.97   16.90
   1   0   4  480.24   14.67
   1   0   4  494.06   14.86
  -2   0  -4   11.05    3.90
   2   0   4    7.31    1.20
   2   0   4    6.54    3.78
   2   0   4    8.30    1.35
  -3   0  -4 2311.09   69.87
   3   0   4 2147.19   66.86
  -4   0  -4   16.18    5.30
   4   0   4   18.56    5.84
  -5   0  -4  221.97   13.67
   5   0   4  219.26   13.86
  -6   0  -4  882.29   33.54
   6   0   4  866.69   37.43
  -7   0  -4 1415.25   51.93
  -8   0  -4  262.42   18.44
  -9   0  -4   31.88    9.60
 -10   0  -4    6.14   13.23
 -12   1   4  930.87   41.41
 -12   1   4  846.01   31.42
 -11   1   4    4.20    3.53
 -11   1   4   -3.75    4.18
 -11   1   4    3.50    7.83
 -10   1   4  575.96   24.17
 -10   1   4  670.16   24.34
 -10   1   4  662.76   31.12
  -9   1   4   29.19    5.35
  -9   1   4   22.68    5.40
  -9   1   4   25.39    8.74
  -8   1   4  109.55   13.00
  -8   1   4  104.94    9.06
  -8   1   4  109.95   11.33
  -8   1   4  117.39    8.63
  -7   1   4    7.50    4.80
  -7   1   4    1.88    3.13
  -7   1   4   11.40    4.27
  -7   1   4    7.03    5.78
   6  -1  -4  147.22   10.62
  -6   1   4  140.89    8.98
  -6   1   4  131.86    9.90
  -6   1   4  138.16    8.45
   5  -1  -4 1557.47   48.77
  -5   1   4 1552.44   47.10
  -5   1   4 1613.72   47.75
  -5   1   4 1527.63   48.58
   4  -1  -4  765.46   26.14
  -4   1   4  777.67   25.72
  -4   1   4  762.46   25.99
   3  -1  -4  762.40   24.54
  -3   1   4  758.63   24.57
  -3   1   4  734.91   24.32
  -3   1   4  786.96   24.31
   2  -1  -4 5530.49  161.78
  -2   1   4 5984.68  162.37
  -2   1   4 5961.03  161.91
   1  -1  -4 1778.39   50.16
   1  -1  -4 1754.81   50.23
  -1   1   4 1727.58   50.04
  -1   1   4 1704.56   50.19
   0  -1  -4   23.80    3.43
   0  -1  -4   27.93    2.96
   0   1   4   30.53    3.40
   0   1   4   28.09    3.66
  -1  -1  -4  622.21   18.70
  -1  -1  -4  602.33   20.61
   1   1   4  629.40   21.06
   1   1   4  616.47   18.65
  -2  -1  -4 1323.22   40.27
  -2  -1  -4 1283.41   36.37
   2   1   4 1270.66   36.29
   2   1   4 1234.09   40.31
  -3  -1  -4 2824.84   78.83
  -3  -1  -4 2897.04   84.18
   3   1   4 2862.19   84.63
   3   1   4 2796.52   78.72
  -4  -1  -4    3.66    1.24
  -4  -1  -4    6.92    4.92
   4   1   4    2.44    4.61
  -5  -1  -4 1345.56   45.46
   5   1   4 1326.02   45.96
  -6  -1  -4    4.33    6.30
   6   1   4    8.38    6.65
  -7  -1  -4   32.56    8.53
  -8  -1  -4  197.24   17.29
  -9  -1  -4  370.94   23.66
 -10  -1  -4   22.28    9.78
 -13   2   4   32.46    5.25
 -12   2   4   25.63   10.38
 -12   2   4   19.79    4.93
 -11   2   4  649.31   31.48
 -11   2   4  648.83   24.71
 -11   2   4  611.82   25.61
 -10   2   4  357.16   21.49
 -10   2   4  322.72   16.16
 -10   2   4  348.50   15.97
  -9   2   4    1.02    5.13
  -9   2   4   -4.64    3.53
  -9   2   4    1.74    6.60
  -9   2   4    4.50    3.59
  -8   2   4  231.23   14.17
  -8   2   4  207.43   12.14
  -8   2   4  216.91   11.71
  -8   2   4  222.85   15.70
  -7   2   4  205.67   13.50
  -7   2   4  182.38   10.82
  -7   2   4  199.52   10.60
  -7   2   4  208.54   12.51
  -6   2   4   65.62    6.75
  -6   2   4   65.80    7.56
  -6   2   4   57.80    6.17
   5  -2  -4 1092.47   36.07
  -5   2   4 1143.50   36.01
  -5   2   4 1155.64   35.65
  -5   2   4 1131.88   36.16
   4  -2  -4  319.18   13.35
   4  -2  -4  325.88   13.69
  -4   2   4  299.49   13.10
   3  -2  -4 3335.24   93.02
   3  -2  -4 3239.25   93.85
  -3   2   4 3303.85   92.83
  -3   2   4 3280.76   93.80
   2  -2  -4 3453.13   98.27
   2  -2  -4 3487.66   97.20
  -2   2   4 3490.78   97.17
  -2   2   4 3446.58   98.25
   1  -2  -4 2867.91   81.15
   1  -2  -4 2839.81   80.48
  -1   2   4 2853.68   80.42
  -1   2   4 2864.22   81.10
   0  -2  -4  217.35    9.16
   0  -2  -4  215.89    8.69
   0   2   4  189.91    8.47
   0   2   4  219.75    9.59
  -1  -2  -4 3449.33   96.91
  -1  -2  -4 3323.67   95.06
   1   2   4 3466.58   95.08
   1   2   4 3324.19   97.24
  -2  -2  -4   -3.76    4.82
  -2  -2  -4    4.36    2.42
   2   2   4    0.24    4.75
   2   2   4    7.46    2.45
  -3  -2  -4  108.74    9.53
  -3  -2  -4  105.71    5.30
   3   2   4  109.84    5.28
   3   2   4  118.98   10.06
  -4  -2  -4 1128.98   38.16
  -4  -2  -4 1098.92   31.84
   4   2   4 1093.96   38.48
   4   2   4 1050.68   31.60
  -5  -2  -4 2804.51   87.35
  -5  -2  -4 2902.17   79.63
   5   2   4 2821.13   79.37
  -6  -2  -4  111.87   13.13
  -6  -2  -4  102.33    4.85
   6   2   4  109.25    4.77
  -7  -2  -4   24.28    8.48
  -8  -2  -4  139.13   15.94
 -13   3   4   -3.14    7.80
 -13   3   4   12.24    3.97
 -12   3   4    2.20    3.72
 -12   3   4   -3.31    7.20
 -11   3   4   41.65    9.90
 -11   3   4   45.84    6.63
 -10   3   4   17.66    5.15
 -10   3   4   19.93    5.24
 -10   3   4   27.05    8.32
  -9   3   4  312.59   14.72
  -9   3   4  279.85   16.61
  -9   3   4  267.47   17.55
  -9   3   4  311.11   15.04
  -8   3   4   12.69    6.37
  -8   3   4   10.88    4.36
  -8   3   4    6.77    4.43
  -8   3   4   14.65    5.83
  -7   3   4  503.11   20.36
  -7   3   4  488.67   20.98
  -7   3   4  497.34   19.59
  -7   3   4  498.46   19.32
  -6   3   4 1325.65   41.53
  -6   3   4 1296.28   41.43
   5  -3  -4  226.19   11.00
   5  -3  -4  227.13   11.49
  -5   3   4  227.06   10.88
  -5   3   4  228.97   11.48
   4  -3  -4  642.14   23.07
   4  -3  -4  755.31   25.03
  -4   3   4  746.56   23.40
  -4   3   4  765.49   24.97
   3  -3  -4 6090.90  168.85
   3  -3  -4 5887.50  166.74
  -3   3   4 5984.06  170.50
  -3   3   4 6095.67  166.71
   2  -3  -4 4022.70  113.92
   2  -3  -4 4048.90  115.80
  -2   3   4 4171.95  113.92
  -2   3   4 4132.34  115.89
   1  -3  -4  497.49   16.33
   1  -3  -4  466.54   17.06
  -1   3   4  491.36   16.51
  -1   3   4  493.48   17.15
   0  -3  -4 1053.23   34.94
   0  -3  -4 1210.64   35.26
   0   3   4 1205.24   35.80
  -1  -3  -4 1913.30   57.69
  -1  -3  -4 1994.75   56.29
   1   3   4 1945.59   56.12
   1   3   4 1895.73   58.21
  -2  -3  -4  565.54   21.87
  -2  -3  -4  605.47   19.13
   2   3   4  576.81   22.48
   2   3   4  581.65   18.93
  -3  -3  -4  340.82   12.52
  -3  -3  -4  350.74   16.61
   3   3   4  349.71   17.05
   3   3   4  353.54   12.49
  -4  -3  -4 1018.98   30.23
  -4  -3  -4 1028.47   36.17
   4   3   4  954.13   36.31
   4   3   4  975.48   29.94
  -5  -3  -4  544.52   24.65
  -5  -3  -4  531.53   17.58
   5   3   4  531.79   17.30
  -6  -3  -4  250.86   17.51
  -6  -3  -4  224.96    9.14
   6   3   4  229.97    8.80
  -7  -3  -4  601.08   18.87
  -7  -3  -4  619.35   29.41
  -8  -3  -4  202.87   18.37
  -9  -3  -4    9.87    8.77
 -13   4   4  138.67   22.30
 -13   4   4  114.01    9.60
 -12   4   4    8.06    7.83
 -12   4   4    0.59    3.67
 -11   4   4   14.79    7.25
 -10   4   4   18.59    5.38
 -10   4   4   23.79    7.50
 -10   4   4   33.59    5.85
 -10   4   4   22.81    6.68
  -9   4   4   26.10    7.51
  -9   4   4   21.27    5.38
  -9   4   4   26.38    6.12
  -9   4   4   23.04    6.59
  -8   4   4   12.35    6.41
  -8   4   4    9.32    4.57
  -8   4   4    7.65    4.52
  -8   4   4    5.14    5.03
   7  -4  -4   80.81    8.40
  -7   4   4   71.07    7.65
  -7   4   4   75.23    8.83
  -7   4   4   70.55    7.84
   6  -4  -4  162.71   10.40
  -6   4   4  174.45   10.21
  -6   4   4  171.72    9.53
   5  -4  -4  449.54   16.30
   5  -4  -4  459.64   18.10
  -5   4   4  457.44   16.21
  -5   4   4  452.82   17.92
   4  -4  -4   67.97    7.31
   4  -4  -4   56.87    5.15
  -4   4   4   69.70    7.20
  -4   4   4   57.95    5.39
   3  -4  -4  171.87    7.36
   3  -4  -4  186.05   10.25
  -3   4   4  191.27    7.71
  -3   4   4  184.82   10.38
   2  -4  -4  119.29    8.97
   2  -4  -4  113.62    6.19
  -2   4   4  128.66    6.59
  -2   4   4  125.68    8.45
   1  -4  -4   38.28    5.17
   1  -4  -4   33.91    4.21
  -1   4   4   40.10    4.76
   0  -4  -4   86.00    6.95
   0  -4  -4   73.65    6.47
   0   4   4   83.90    7.53
  -1  -4  -4  260.38   11.13
  -1  -4  -4  281.52   12.85
   1   4   4  247.63   10.97
  -2  -4  -4  653.37   24.12
  -2  -4  -4  627.31   21.38
   2   4   4  643.24   24.67
   2   4   4  644.26   21.36
  -3  -4  -4  511.64   17.80
  -3  -4  -4  509.13   21.71
   3   4   4  521.76   17.70
   3   4   4  473.52   21.86
  -4  -4  -4   36.29    7.89
  -4  -4  -4   35.59    4.57
   4   4   4   34.98    4.19
  -5  -4  -4  181.87    8.95
  -5  -4  -4  182.28   18.62
  -5  -4  -4  193.44   16.18
   5   4   4  173.70    8.46
  -6  -4  -4   98.57    6.53
  -6  -4  -4  103.18   13.34
   6   4   4  110.55    6.16
  -7  -4  -4   32.74    3.97
  -7  -4  -4   38.49    9.96
   7   4   4   44.70    4.01
  -8  -4  -4  501.70   32.70
 -14   5   4   37.26    6.41
 -14   5   4   29.39   10.41
 -13   5   4   13.21    4.73
 -13   5   4   10.76    8.00
 -12   5   4  112.13    9.94
 -12   5   4  111.63   14.10
 -11   5   4   77.92    8.65
 -11   5   4   76.27   10.82
 -10   5   4  384.63   19.46
 -10   5   4  382.42   17.68
 -10   5   4  400.89   20.44
 -10   5   4  366.08   18.83
  -9   5   4   54.14    8.71
  -9   5   4   84.26    9.77
  -9   5   4   66.95    8.18
  -9   5   4   56.50    7.69
   8  -5  -4  421.39   19.29
  -8   5   4  455.86   22.04
  -8   5   4  445.06   18.66
  -8   5   4  423.51   19.17
   7  -5  -4  976.07   33.70
  -7   5   4  943.99   34.29
  -7   5   4  996.47   32.61
  -7   5   4  955.13   33.33
   6  -5  -4   52.15    6.53
  -6   5   4   46.17    5.56
  -6   5   4   50.10    6.04
  -6   5   4   66.14    7.43
   5  -5  -4   16.04    4.65
  -5   5   4   10.53    4.17
  -5   5   4    8.72    2.93
   4  -5  -4  466.56   18.30
  -4   5   4  443.48   17.90
   3  -5  -4   19.65    4.46
  -3   5   4   14.87    4.07
   2  -5  -4   91.87    5.27
   2  -5  -4   92.59    7.75
  -2   5   4   83.74    7.38
  -2   5   4  103.45    5.68
   1  -5  -4  501.81   18.83
   1  -5  -4  507.46   16.87
  -1   5   4  503.52   17.56
  -1   5   4  498.54   18.66
   0  -5  -4 1302.99   38.79
   0  -5  -4 1262.92   39.29
   0   5   4 1201.48   38.98
   0   5   4 1260.13   39.46
  -1  -5  -4    9.41    3.69
  -1  -5  -4    5.68    4.16
   1   5   4    9.87    3.48
   1   5   4    5.64    4.49
  -2  -5  -4  563.94   20.17
  -2  -5  -4  551.81   22.31
   2   5   4  559.87   19.92
  -3  -5  -4   19.27    4.37
  -3  -5  -4   13.75    6.29
  -3  -5  -4   10.66    5.49
   3   5   4   16.60    3.91
  -4  -5  -4   61.27    6.59
  -4  -5  -4   74.85    9.50
  -4  -5  -4   55.35    9.06
   4   5   4   65.08    6.03
  -5  -5  -4   -2.71    3.04
  -5  -5  -4    6.17    6.65
   5   5   4    3.30    2.70
  -6  -5  -4  163.08    8.83
  -6  -5  -4  161.80   15.64
   6   5   4  150.14    7.96
  -7  -5  -4   36.38   10.23
  -7  -5  -4   36.85    6.45
   7   5   4   40.79    5.32
  -8  -5  -4   42.67   11.67
 -14   6   4  138.42   11.39
 -14   6   4  117.79   15.51
 -13   6   4  480.00   26.11
 -13   6   4  507.75   22.48
 -12   6   4   45.66    9.65
 -12   6   4   39.71    7.02
 -11   6   4   14.28    4.77
 -11   6   4    6.87    4.38
 -11   6   4    1.92    5.58
 -10   6   4   19.15    5.36
 -10   6   4   28.12    7.20
 -10   6   4   27.54    6.49
   9  -6  -4  366.87   18.53
  -9   6   4  395.58   18.25
  -9   6   4  368.05   17.11
  -9   6   4  363.09   17.90
   8  -6  -4  439.14   20.08
  -8   6   4  474.24   18.88
  -8   6   4  424.32   19.44
  -8   6   4  432.49   17.88
   7  -6  -4  253.06   13.93
  -7   6   4  252.45   11.96
  -7   6   4  233.23   11.10
   6  -6  -4  982.42   33.46
  -6   6   4  905.00   32.69
  -6   6   4  945.18   28.93
  -6   6   4  971.37   29.42
   5  -6  -4   34.20    5.92
  -5   6   4   26.32    5.05
   4  -6  -4  338.19   15.56
  -4   6   4  345.64   15.45
   3  -6  -4  766.13   26.51
  -3   6   4  706.70   25.90
   2  -6  -4  197.49   11.17
  -2   6   4  209.87   11.03
   1  -6  -4  139.17    9.14
   1  -6  -4  125.89    7.14
  -1   6   4  127.15    8.66
   0  -6  -4   27.49    4.96
   0  -6  -4   30.74    5.21
   0  -6  -4   30.54    5.05
   0   6   4   28.85    4.95
  -1  -6  -4  141.52   10.13
  -1  -6  -4  119.13    9.68
  -1  -6  -4  119.98    8.78
   1   6   4  127.23    8.76
  -2  -6  -4  364.78   17.30
  -2  -6  -4  317.48   16.37
  -2  -6  -4  332.87   14.84
   2   6   4  341.48   14.73
  -3  -6  -4   47.01    6.18
  -3  -6  -4   58.53    8.96
   3   6   4   57.99    6.37
  -4  -6  -4  179.58   10.32
   4   6   4  157.46    9.35
  -5  -6  -4    3.60    6.94
  -5  -6  -4   11.13    4.03
   5   6   4    7.05    3.14
  -6  -6  -4   20.03    8.67
  -6  -6  -4   23.77    4.60
  -7  -6  -4   83.67    6.96
  -7  -6  -4   84.76   13.84
 -14   7   4   79.34   12.42
 -14   7   4  103.20   10.42
 -13   7   4  301.29   16.86
 -13   7   4  267.89   18.22
 -12   7   4    7.00    4.93
 -12   7   4    5.21    6.09
 -11   7   4   52.25    7.91
 -11   7   4   58.86    8.08
 -11   7   4   62.10    9.16
  10  -7  -4  135.62   12.32
 -10   7   4  141.57   11.46
 -10   7   4  163.41   11.50
   9  -7  -4   66.57    8.81
  -9   7   4   57.35    6.97
  -9   7   4   68.14    7.99
   8  -7  -4  260.16   15.43
  -8   7   4  275.59   12.24
  -8   7   4  270.28   12.65
  -8   7   4  255.10   14.86
   7  -7  -4   34.18    6.68
  -7   7   4   25.89    6.27
  -7   7   4   31.30    4.17
  -7   7   4   31.77    4.42
   6  -7  -4  204.41   12.71
  -6   7   4  191.87   12.28
   5  -7  -4   -1.45    4.04
  -5   7   4    3.30    8.00
   4  -7  -4    7.12    4.54
  -4   7   4    6.46    4.01
   3  -7  -4 1726.81   53.76
  -3   7   4 1676.01   53.28
   2  -7  -4  104.24    9.20
   2  -7  -4  105.06    5.62
  -2   7   4   89.52    8.52
   1  -7  -4  560.80   19.84
   1  -7  -4  574.17   22.32
   1  -7  -4  579.07   19.59
  -1   7   4  596.91   22.38
   0  -7  -4  244.22   12.30
   0  -7  -4  254.69   13.38
   0  -7  -4  252.05   12.49
   0   7   4  257.19   13.16
  -1  -7  -4  179.01   11.84
  -1  -7  -4  157.77   10.71
  -1  -7  -4  179.25   11.43
  -2  -7  -4  131.84    9.83
  -2  -7  -4  109.74   11.16
  -2  -7  -4  135.42   11.11
   2   7   4  122.94    9.34
  -3  -7  -4   -5.71    5.31
  -3  -7  -4    9.53    4.38
   3   7   4   -1.21    3.34
  -4  -7  -4  389.08   21.34
  -4  -7  -4  390.76   17.02
   4   7   4  392.49   16.45
  -5  -7  -4   -5.16    3.41
  -5  -7  -4    3.34    6.82
   5   7   4    1.73    2.84
  -6  -7  -4   51.44   11.35
  -7  -7  -4    0.75    8.92
 -13   8   4    3.06    6.41
 -13   8   4    8.09    4.89
 -12   8   4   11.15    5.53
 -12   8   4    0.13    5.22
 -11   8   4  526.67   22.61
 -11   8   4  546.27   22.03
  10  -8  -4   33.38    7.43
 -10   8   4   43.01    5.90
 -10   8   4   23.74    6.03
   9  -8  -4  995.38   36.67
  -9   8   4  993.86   33.57
  -9   8   4  955.35   31.77
   8  -8  -4  135.25   11.90
   7  -8  -4   66.51   13.99
   6  -8  -4    9.72    5.03
  -6   8   4    2.03    4.81
   5  -8  -4   17.95    6.03
  -5   8   4   20.02    5.81
   4  -8  -4 1055.39   36.62
  -4   8   4 1017.75   36.04
   3  -8  -4   77.69    9.18
  -3   8   4   69.31    8.31
   2  -8  -4  383.96   18.18
  -2   8   4  394.06   17.92
   1  -8  -4    3.01    3.33
   1  -8  -4    4.82    3.65
   1  -8  -4    9.93    5.11
  -1   8   4    7.89    4.89
   0  -8  -4   58.40    7.26
   0  -8  -4   61.44    7.75
   0  -8  -4   72.39    7.83
   0   8   4   50.90    7.29
  -1  -8  -4   -5.50    4.50
  -1  -8  -4    2.54    3.91
  -1  -8  -4    1.99    4.73
   1   8   4   -3.02    1.53
  -2  -8  -4   37.38    7.66
  -2  -8  -4   30.17    6.41
   2   8   4   35.53    5.96
  -3  -8  -4  179.02   15.36
  -3  -8  -4  167.43   11.47
   3   8   4  171.99   10.79
  -4  -8  -4   -3.13    6.46
  -4  -8  -4    8.15    4.63
  -5  -8  -4    4.46    7.36
  -5  -8  -4    3.97    4.46
   5   8   4   20.50    4.40
  -6  -8  -4   79.09   13.64
  -6  -8  -4   84.43    8.33
 -13   9   4   -6.11    4.66
 -12   9   4    6.55    5.56
  11  -9  -4  132.38   13.12
 -11   9   4  122.86    9.99
 -11   9   4  168.64    9.70
  10  -9  -4  170.95   14.10
 -10   9   4  176.51    9.83
 -10   9   4  178.39   13.65
   9  -9  -4    3.55    5.25
   8  -9  -4  330.93   18.52
   7  -9  -4   -3.56    4.15
   6  -9  -4   22.77    6.40
   5  -9  -4  181.27   13.12
   4  -9  -4   65.65    8.98
   1  -9  -4  519.38   18.48
   1  -9  -4  509.23   18.48
   0  -9  -4   85.24    8.35
   0  -9  -4   79.15    7.69
   0  -9  -4   71.24   11.54
  -1  -9  -4   77.58    8.92
  -1  -9  -4   88.08    9.23
  -1  -9  -4   70.14    9.22
  -2  -9  -4   20.19    6.20
  -2  -9  -4   21.81    6.88
  -3  -9  -4   41.29    7.26
  -3  -9  -4   34.99    8.58
  -4  -9  -4  138.75   15.02
  -4  -9  -4  154.05   11.60
  -5  -9  -4  121.60   18.68
  -5  -9  -4  147.92   11.17
 -13  10   4   36.75    8.38
  12 -10  -4   72.48   10.90
 -12  10   4   56.14    7.20
  11 -10  -4  137.02   13.95
  10 -10  -4   61.82   10.02
   9 -10  -4   33.16    7.76
   8 -10  -4  815.81   33.14
   7 -10  -4   31.40    7.79
   6 -10  -4   67.82    9.22
   5 -10  -4   97.03   11.08
   4 -10  -4    4.76    5.41
   3 -10  -4   20.28    6.30
   2 -10  -4  137.73   12.16
   1 -10  -4  146.88   12.33
   1 -10  -4  119.29    8.08
   1 -10  -4  131.22    7.81
   0 -10  -4   95.29   10.47
   0 -10  -4   87.36    8.68
  -1 -10  -4  373.53   19.44
  -1 -10  -4  370.39   18.17
  -1 -10  -4  440.09   17.64
  -2 -10  -4  120.62   12.14
  -2 -10  -4  112.29   11.21
  -3 -10  -4  178.17   14.92
  -3 -10  -4  191.07   13.29
  -4 -10  -4   -3.33    7.15
  -4 -10  -4   -6.10    4.68
  12 -11  -4    7.63    6.28
  11 -11  -4    5.19    6.08
   9 -11  -4    5.90    6.03
   8 -11  -4   34.95    8.73
   7 -11  -4   47.14    8.49
   6 -11  -4   49.18    9.16
   5 -11  -4   63.91    9.91
   4 -11  -4   80.70   10.51
   3 -11  -4    2.54    5.67
   2 -11  -4   12.81    6.15
   1 -11  -4   13.12    6.06
   1 -11  -4   14.63    7.02
   0 -11  -4   70.76    7.89
   0 -11  -4   86.74   10.66
  -1 -11  -4   37.16    7.27
  -1 -11  -4   48.20    8.95
  -2 -11  -4  152.28   13.43
  -2 -11  -4  141.73   13.06
  -3 -11  -4   28.31    8.81
  -3 -11  -4   36.45    7.95
  10 -12  -4  359.85   21.73
   9 -12  -4  376.06   22.14
   8 -12  -4  227.28   17.21
   7 -12  -4  478.18   26.29
   6 -12  -4  308.29   19.09
   5 -12  -4   57.11    9.97
   4 -12  -4   17.62    7.19
   3 -12  -4   31.73    7.99
   2 -12  -4    9.17    6.51
   1 -12  -4   55.45    9.64
   0 -12  -4  149.71   10.04
  -1 -12  -4   91.21   10.32
  -1 -12  -4  110.43   12.73
   8 -13  -4  131.20   14.71
   7 -13  -4   99.40   12.79
   6 -13  -4  118.96   13.93
   5 -13  -4  302.98   19.88
   4 -13  -4   -2.27    6.62
   3 -13  -4  187.79   16.44
   2 -13  -4   -0.70    6.52
   1 -13  -4   -1.87    5.81
  -1 -14   5   25.06    7.51
   0 -14   5   22.24    6.60
   1 -14   5    2.39    7.25
   1 -14   5   -3.91    5.26
   2 -14   5  164.95   10.93
   2 -14   5  142.02   15.86
   3 -14   5  363.18   15.50
   3 -14   5  359.58   21.85
   4 -14   5  461.00   24.69
   5 -14   5  471.63   24.99
   6 -14   5    3.55    7.64
   7 -14   5  117.65   13.23
   8 -14   5   13.87    7.54
   9 -14   5   24.45    8.68
  10 -14   5  314.36   20.11
  11 -14   5   48.22    9.07
  -2 -13   5   53.97   10.13
  -1 -13   5  323.46   19.38
  -1 -13   5  395.16   22.45
   0 -13   5   -1.56    6.91
   0 -13   5    1.48    4.85
   1 -13   5  118.81   10.84
   1 -13   5  155.12    9.81
   2 -13   5  243.43   12.32
   2 -13   5  245.02   17.52
  -3  13  -5  194.02   11.72
   3 -13   5  173.06   15.25
   3 -13   5  138.29    9.12
  -4  13  -5   23.15    5.13
   4 -13   5   19.00    4.34
   4 -13   5   22.22    8.12
   5 -13   5  142.74   14.15
   6 -13   5  590.01   27.40
   7 -13   5  569.51   26.58
   8 -13   5  812.37   33.50
  -9  13  -5  121.52    8.38
   9 -13   5  115.72   13.12
  10 -13   5   10.99    6.73
 -11  13  -5  107.88   11.36
  11 -13   5   56.05   15.52
  -4 -12   5   10.19    8.19
  -3 -12   5    4.93    6.36
  -3 -12   5    4.91    6.83
  -2 -12   5  583.25   27.45
  -2 -12   5  576.60   31.45
  -1 -12   5  223.84   16.80
  -1 -12   5  247.87   16.32
   0 -12   5  219.34   12.50
   0 -12   5  235.93   16.64
  -1  12  -5   58.54    8.50
   1 -12   5   47.97    9.24
   1 -12   5   66.76    7.12
  -2  12  -5   -0.71    4.42
   2 -12   5    3.42    3.91
   2 -12   5   -6.90    5.44
  -3  12  -5    7.73    4.45
   3 -12   5   -0.65    3.59
   3 -12   5    1.81    6.42
   4 -12   5   84.43   10.96
  -5  12  -5 1140.81   35.85
   5 -12   5 1138.66   41.52
   5 -12   5 1115.39   35.43
  -6  12  -5    4.88    3.72
   6 -12   5   14.49    7.20
   6 -12   5    6.44    3.72
   7 -12   5  388.66   20.57
  -8  12  -5  686.94   24.12
   8 -12   5  663.50   28.43
   8 -12   5  656.77   24.14
  -9  12  -5   29.33    5.60
   9 -12   5   25.42    7.50
   9 -12   5   23.50    5.21
 -10  12  -5  517.16   21.26
  10 -12   5  515.15   24.16
 -11  12  -5  140.07   11.04
  11 -12   5  136.27   12.77
 -12  12  -5   70.79    9.90
  12 -12   5   88.41   10.88
  -5 -11   5   88.26   11.60
  -5 -11   5  104.55   14.44
  -4 -11   5   -9.25    7.98
  -4 -11   5    3.22    7.18
  -3 -11   5    6.63    6.48
  -3 -11   5    3.13    6.73
  -2 -11   5   35.10    8.63
  -2 -11   5   25.88    8.09
  -1 -11   5  454.76   20.37
  -1 -11   5  451.85   22.57
   0  11  -5  155.86   13.57
   0 -11   5  164.78   11.14
  -1  11  -5   34.20    6.88
   1 -11   5   30.40    5.42
   1 -11   5   24.92    6.93
  -2  11  -5   20.35    5.60
   2 -11   5   14.90    6.44
   2 -11   5   19.04    5.12
  -3  11  -5 2004.25   59.18
   3 -11   5 1882.47   62.56
   3 -11   5 1921.29   58.01
  -4  11  -5  276.50   17.08
   4 -11   5  342.01   18.03
  -5  11  -5  262.21   12.43
   5 -11   5  259.38   15.04
   5 -11   5  269.46   16.19
   6 -11   5   91.94    8.13
   6 -11   5  119.00   11.96
  -7  11  -5  220.56   12.16
   7 -11   5  224.67   11.91
   7 -11   5  251.79   15.49
  -8  11  -5   66.57    7.72
   8 -11   5   60.06    7.43
   8 -11   5   61.07    9.04
  -9  11  -5  319.40   15.91
   9 -11   5  312.10   16.02
   9 -11   5  336.75   18.00
 -10  11  -5   93.55   10.10
  10 -11   5   89.15   10.13
  11 -11   5  557.86   24.46
 -12  11  -5   16.56    6.75
  12 -11   5    5.86    5.54
  -6 -10   5  206.96   19.60
  -6 -10   5  221.24   16.14
  -5 -10   5    1.58    5.94
  -5 -10   5    2.82    7.21
  -4 -10   5  407.77   24.18
  -4 -10   5  427.80   21.64
  -3 -10   5   61.43    9.80
  -3 -10   5   74.84   11.32
  -2 -10   5    8.61    5.94
  -2 -10   5   19.84    5.71
   1  10  -5  206.38   14.76
  -1 -10   5  201.24   14.52
   0  10  -5   76.73    9.45
   0 -10   5   70.45    8.34
   0 -10   5   80.57   10.17
  -1  10  -5  182.51   12.30
   1 -10   5  186.43   13.17
   1 -10   5  167.15   10.62
   2 -10   5   68.05    7.66
   2 -10   5   79.21   10.21
  -3  10  -5  724.13   25.54
   3 -10   5  613.78   29.46
   3 -10   5  714.22   24.03
  -4  10  -5 1356.97   43.18
  -4  10  -5 1396.36   45.68
   4 -10   5 1294.28   45.16
  -5  10  -5   15.79    5.02
   5 -10   5   26.86    5.46
   5 -10   5   22.27    6.50
  -6  10  -5    2.17    4.31
  -6  10  -5    3.12    3.70
   6 -10   5   -3.68    3.70
   6 -10   5    2.22    4.95
  -7  10  -5  835.40   29.30
  -7  10  -5  822.21   30.39
   7 -10   5  886.54   31.78
   7 -10   5  830.95   29.52
  -8  10  -5  681.03   25.31
  -8  10  -5  639.43   26.61
   8 -10   5  685.07   26.82
   8 -10   5  663.01   25.73
  -9  10  -5  284.35   15.28
   9 -10   5  228.44   14.38
   9 -10   5  304.31   18.18
 -10  10  -5   69.23    9.65
  10 -10   5   82.96   11.54
  10 -10   5   77.35    9.39
 -11  10  -5  271.22   17.26
  11 -10   5  320.06   16.54
 -12  10  -5   -5.84    5.88
  12 -10   5    7.94    4.72
 -13  10  -5   -8.03    6.33
  -7  -9   5   39.39   13.41
  -6  -9   5  393.56   32.23
  -6  -9   5  402.89   21.05
  -5  -9   5   63.67    9.78
  -5  -9   5   54.46   11.10
  -4  -9   5  342.02   21.10
  -4  -9   5  335.22   18.36
  -3  -9   5   39.60    7.87
   2   9  -5   14.55    6.36
  -2  -9   5   18.03    6.43
   1   9  -5   12.29    6.22
  -1  -9   5   18.06    5.72
  -1  -9   5   13.97    9.91
   0   9  -5  253.65   13.95
   0   9  -5  267.47   14.88
   0  -9   5  257.90   13.70
   0  -9   5  262.55   14.91
  -1   9  -5  776.51   28.65
  -1   9  -5  780.07   28.09
   1  -9   5  778.37   29.37
   1  -9   5  780.33   27.23
  -2   9  -5  409.61   17.01
  -2   9  -5  386.47   17.83
   2  -9   5  397.47   18.33
   2  -9   5  387.50   16.20
  -3   9  -5   60.51    7.67
  -3   9  -5   55.90    7.56
   3  -9   5   58.21    6.90
   3  -9   5   48.88    7.55
  -4   9  -5  360.75   17.97
  -4   9  -5  362.79   15.22
   4  -9   5  354.48   17.37
  -5   9  -5  314.79   16.63
   5  -9   5  288.95   13.74
   5  -9   5  312.07   15.78
  -6   9  -5  290.64   14.19
   6  -9   5  281.85   13.88
   6  -9   5  278.63   15.07
  -7   9  -5   44.79    7.14
   7  -9   5   38.24    6.64
   7  -9   5   42.66    7.15
  -8   9  -5   10.08    5.71
  -8   9  -5    5.10    4.71
   8  -9   5    4.82    4.96
   8  -9   5    9.85    5.07
  -9   9  -5  561.16   24.09
  -9   9  -5  566.02   22.27
   9  -9   5  610.30   23.55
 -10   9  -5  116.38    8.93
 -10   9  -5  134.10   12.71
  10  -9   5  138.74   13.62
  10  -9   5  127.13   10.62
 -11   9  -5  644.65   28.37
 -11   9  -5  666.28   24.57
  11  -9   5  678.62   25.55
 -12   9  -5   53.05    9.92
 -13   9  -5   51.05   13.05
  -8  -8   5   14.99    6.50
  -7  -8   5    1.05    7.67
  -7  -8   5    6.12    5.46
  -6  -8   5  114.32   15.74
  -6  -8   5  113.02   11.37
  -5  -8   5  334.63   21.38
  -5  -8   5  315.37   17.35
  -4  -8   5  461.06   21.11
   3   8  -5  586.07   26.31
  -3  -8   5  580.02   25.03
   2   8  -5    6.98    6.00
   2   8  -5   15.52    4.56
  -2  -8   5   10.05    5.34
  -2  -8   5    5.90    5.38
   1   8  -5   62.52    8.35
   1   8  -5   64.95    7.68
  -1  -8   5   51.33    7.60
   0   8  -5  905.42   32.78
   0  -8   5  987.71   33.36
   0  -8   5  958.71   32.27
  -1   8  -5  702.10   25.67
  -1   8  -5  724.20   25.60
   1  -8   5  697.17   24.72
   1  -8   5  692.57   26.24
  -2   8  -5  406.03   19.43
  -2   8  -5  466.80   18.61
   2  -8   5  455.75   17.45
   2  -8   5  452.78   19.04
  -3   8  -5   10.59    3.88
  -3   8  -5   10.82    4.29
   3  -8   5    7.82    3.88
   3  -8   5    9.30    4.46
  -4   8  -5  106.51    8.47
  -4   8  -5  113.41    8.33
   4  -8   5  103.51    9.21
  -5   8  -5 1479.64   47.21
  -5   8  -5 1525.46   46.93
   5  -8   5 1503.58   46.92
   5  -8   5 1529.67   47.87
  -6   8  -5  900.83   30.72
  -6   8  -5  856.00   29.90
   6  -8   5  877.22   30.75
   6  -8   5  912.02   30.90
  -7   8  -5  559.94   22.68
  -7   8  -5  570.12   21.33
   7  -8   5  581.09   22.09
   7  -8   5  549.59   22.69
  -8   8  -5    2.90    5.19
  -8   8  -5    5.78    3.58
   8  -8   5   -1.24    4.67
   8  -8   5   -2.08    4.13
  -9   8  -5   -1.94    5.40
  -9   8  -5    1.97    3.41
   9  -8   5    5.29    5.35
   9  -8   5    6.17    4.44
 -10   8  -5   40.06    5.44
 -10   8  -5   29.84    7.75
  10  -8   5   45.32    6.27
 -11   8  -5   49.20    9.15
 -11   8  -5   59.56    6.13
  11  -8   5   53.87    6.63
 -12   8  -5  212.92   16.87
 -12   8  -5  201.48   10.08
 -13   8  -5  139.86   15.68
  -8  -7   5  247.45   21.69
  -8  -7   5  229.12   15.20
  -7  -7   5   25.73    6.84
  -7  -7   5   44.53   10.98
  -6  -7   5  244.08   14.79
  -6  -7   5  248.87   19.35
  -5  -7   5   10.21    5.26
   4   7  -5  170.47   10.98
   4   7  -5  153.75   14.12
  -4  -7   5  167.91   11.80
  -4  -7   5  156.24   12.72
   3   7  -5 2003.22   63.87
   3   7  -5 1943.29   61.13
  -3  -7   5 1964.85   61.56
   2   7  -5   68.30    9.31
   2   7  -5   77.27    8.20
  -2  -7   5   66.57    8.85
  -2  -7   5   48.54    6.94
   1   7  -5  104.00    9.66
   1   7  -5  120.79    8.57
  -1  -7   5  114.06    9.53
  -1  -7   5  118.64    9.18
   0   7  -5  946.59   32.28
   0   7  -5  945.15   31.92
   0  -7   5  979.76   32.47
   0  -7   5  928.66   31.54
  -1   7  -5   82.98    7.02
   1  -7   5   82.17    7.96
   1  -7   5   84.50    7.35
  -2   7  -5   87.84    7.28
  -2   7  -5   97.50    7.84
   2  -7   5  104.97    8.49
   2  -7   5  102.20    7.70
  -3   7  -5   20.42    4.68
  -3   7  -5   19.28    4.04
   3  -7   5   17.91    4.46
   3  -7   5   19.20    4.56
  -4   7  -5 2036.88   61.35
  -4   7  -5 2095.80   61.66
   4  -7   5 2045.72   61.84
  -5   7  -5   65.51    8.11
  -5   7  -5   74.92    6.37
   5  -7   5   73.11    7.58
   5  -7   5   77.34    7.62
  -6   7  -5  419.40   18.20
  -6   7  -5  428.80   16.61
   6  -7   5  421.09   18.44
   6  -7   5  430.39   17.30
  -7   7  -5  241.10   11.28
  -7   7  -5  224.18   13.68
   7  -7   5  251.68   12.30
   7  -7   5  218.92   13.79
  -8   7  -5   -2.13    5.46
  -8   7  -5   -0.32    2.54
   8  -7   5   -0.61    1.42
   8  -7   5   -4.99    3.41
  -9   7  -5   41.44    8.38
  -9   7  -5   46.66    5.33
   9  -7   5   41.90    5.92
   9  -7   5   42.91    8.04
 -10   7  -5   68.13   10.48
 -10   7  -5   73.64    6.06
  10  -7   5   71.51    7.12
 -11   7  -5  144.56   14.54
 -11   7  -5  159.88    8.26
 -11   7  -5  155.24    8.22
 -12   7  -5   45.35   10.42
 -13   7  -5   39.03   10.59
  -9  -6   5    3.96    5.44
  -8  -6   5    9.59    5.59
  -8  -6   5  -15.75   12.45
  -7  -6   5   75.45   12.60
  -7  -6   5   97.76   10.17
  -6  -6   5   29.84    7.85
  -6  -6   5   31.38    9.93
   5   6  -5   67.21    7.61
  -5  -6   5   56.57    8.00
   4   6  -5   68.81    9.80
   4   6  -5   54.11    9.80
  -4  -6   5   79.44   10.04
  -4  -6   5   77.61    8.83
   3   6  -5 2243.66   69.98
   3   6  -5 2183.03   67.36
  -3  -6   5 2275.83   67.87
  -3  -6   5 2198.34   69.23
   2   6  -5 3345.47   99.23
   2   6  -5 3281.89   97.25
  -2  -6   5 3444.02   97.86
  -2  -6   5 3282.76   98.29
   1   6  -5 1844.81   57.29
   1   6  -5 1873.81   56.44
  -1  -6   5 1825.68   56.75
  -1  -6   5 1884.02   56.79
   0   6  -5 1041.69   35.74
   0   6  -5 1167.81   38.76
   0  -6   5 1181.69   36.65
  -1   6  -5  428.78   16.77
  -1   6  -5  431.77   17.18
   1  -6   5  448.20   17.38
   1  -6   5  443.90   16.92
  -2   6  -5 1851.91   57.98
  -2   6  -5 1980.37   58.32
   2  -6   5 1973.40   58.48
   2  -6   5 2013.58   58.03
  -3   6  -5    8.11    2.94
  -3   6  -5    7.66    3.99
   3  -6   5   13.51    4.17
   3  -6   5   11.20    3.94
  -4   6  -5  889.22   30.15
  -4   6  -5  912.64   29.15
   4  -6   5  926.21   29.47
   4  -6   5  892.34   30.92
  -5   6  -5  183.15    8.79
  -5   6  -5  183.33   10.79
   5  -6   5  179.74    9.40
   5  -6   5  144.58    9.87
  -6   6  -5   27.21    4.08
  -6   6  -5   19.90    5.57
   6  -6   5   24.11    4.54
  -7   6  -5 1609.80   52.75
  -7   6  -5 1650.60   49.30
   7  -6   5 1670.20   54.10
   7  -6   5 1681.98   50.14
  -8   6  -5    4.13    2.64
  -8   6  -5   -0.18    5.44
   8  -6   5    2.41    6.57
   8  -6   5    3.66    4.16
  -9   6  -5   49.36    4.93
  -9   6  -5   40.45    8.65
 -10   6  -5   14.44    2.94
 -10   6  -5   12.60    7.32
 -11   6  -5  209.85   17.24
 -11   6  -5  204.90    8.43
 -11   6  -5  209.62    8.48
 -10  -5   5  125.02   11.47
  -9  -5   5   62.40   13.52
  -9  -5   5   40.85    7.66
  -8  -5   5    2.86    7.99
  -8  -5   5    5.57    4.57
   7   5  -5    3.15    1.57
  -7  -5   5    8.85    4.97
  -7  -5   5    7.06    7.97
   6   5  -5  199.06   11.61
  -6  -5   5  206.89   12.80
   5   5  -5  586.13   26.63
   5   5  -5  603.32   22.84
  -5  -5   5  572.92   25.73
  -5  -5   5  604.34   23.31
   4   5  -5  390.39   19.74
   4   5  -5  392.83   16.53
  -4  -5   5  396.30   17.25
  -4  -5   5  383.19   18.88
   3   5  -5 1265.66   40.55
   3   5  -5 1287.13   43.00
  -3  -5   5 1253.51   42.40
  -3  -5   5 1304.95   41.06
   2   5  -5   29.97    4.54
   2   5  -5   21.75    5.36
  -2  -5   5   33.47    5.89
  -2  -5   5   41.11    5.61
   1   5  -5  475.87   18.91
   1   5  -5  443.29   17.19
  -1  -5   5  456.30   18.38
  -1  -5   5  466.74   17.85
   0   5  -5    9.73    3.25
   0   5  -5    8.38    4.55
   0  -5   5    7.38    3.82
   0  -5   5   10.31    4.88
  -1   5  -5  354.47   13.89
  -1   5  -5  329.68   14.58
   1  -5   5  366.11   14.46
  -2   5  -5   27.18    5.39
   2  -5   5   23.06    4.63
  -3   5  -5 2010.34   61.15
  -3   5  -5 2101.55   60.15
   3  -5   5 2068.58   60.29
  -4   5  -5    7.18    2.58
   4  -5   5    8.35    3.99
   4  -5   5    7.14    3.26
  -5   5  -5  221.77    9.30
  -5   5  -5  213.76   12.00
   5  -5   5  227.22   12.33
   5  -5   5  223.57    9.88
  -6   5  -5  256.97   14.04
  -6   5  -5  260.58   10.17
   6  -5   5  247.13   10.62
   6  -5   5  254.16   14.36
  -7   5  -5   54.60    8.44
  -7   5  -5   41.32    4.29
   7  -5   5   53.64    8.93
   7  -5   5   47.31    4.85
  -8   5  -5   96.69   11.64
  -8   5  -5   87.62    5.51
   8  -5   5  109.97    6.59
   8  -5   5  117.10   12.02
  -9   5  -5  115.47    5.85
  -9   5  -5  104.01    5.63
  -9   5  -5  130.56   13.10
 -10   5  -5  301.08   10.35
 -10   5  -5  301.77   10.29
 -10   5  -5  325.60   20.16
 -11   5  -5  195.50   17.53
 -12   5  -5  108.41   14.90
 -11  -4   5   65.13    8.62
 -10  -4   5   23.05    5.59
 -10  -4   5   12.99    9.68
  -9  -4   5   83.96    9.42
  -9  -4   5  100.83   15.42
   8   4  -5  155.42   14.60
  -8  -4   5  169.58   11.64
  -8  -4   5  168.59   17.09
  -7  -4   5  239.40   18.27
  -7  -4   5  260.97   13.97
   6   4  -5   66.45    6.93
  -6  -4   5   55.11    7.11
  -6  -4   5   51.01   10.92
   5   4  -5   -0.23    5.30
   5   4  -5    6.24    3.38
  -5  -4   5    1.27    5.54
  -5  -4   5    1.60    3.85
   4   4  -5  188.48   12.96
   4   4  -5  168.92    9.59
  -4  -4   5  171.23   11.94
  -4  -4   5  205.20   10.86
   3   4  -5 1479.40   45.96
   3   4  -5 1486.89   48.42
  -3  -4   5 1540.56   46.47
  -3  -4   5 1484.06   47.90
   2   4  -5  437.15   18.48
   2   4  -5  467.16   16.96
  -2  -4   5  424.92   18.05
  -2  -4   5  441.74   17.10
   1   4  -5   37.56    4.89
   1   4  -5   35.62    6.02
  -1  -4   5   33.54    5.18
  -1  -4   5   38.20    7.53
   0   4  -5 1925.24   59.45
   0   4  -5 2053.71   58.93
   0  -4   5 2039.68   59.06
   0  -4   5 2018.82   59.48
  -1   4  -5   30.96    5.26
  -1   4  -5   30.31    3.86
   1  -4   5   27.76    4.00
   1  -4   5   29.62    5.46
  -2   4  -5    8.96    2.76
  -2   4  -5   15.97    5.08
   2  -4   5    7.42    4.80
   2  -4   5   12.76    3.53
  -3   4  -5  661.44   21.33
  -3   4  -5  644.59   23.65
   3  -4   5  699.86   23.85
   3  -4   5  689.72   21.71
  -4   4  -5  118.77    9.58
  -4   4  -5  115.79    5.95
   4  -4   5  113.52    9.22
   4  -4   5  103.34    6.22
  -5   4  -5  484.02   19.99
  -5   4  -5  506.00   16.18
   5  -4   5  490.87   20.54
   5  -4   5  518.20   16.52
  -6   4  -5  920.78   27.81
  -6   4  -5  955.91   33.28
   6  -4   5  919.70   33.67
   6  -4   5  946.62   28.13
  -7   4  -5   11.64    6.32
  -7   4  -5    8.64    1.95
   7  -4   5    9.37    6.24
  -8   4  -5   15.88    2.14
  -8   4  -5   16.75    2.16
  -8   4  -5   20.45    7.48
   8  -4   5   25.41    7.49
  -9   4  -5  189.67   15.78
 -10   4  -5  281.42   19.48
 -11   4  -5   66.06   12.09
 -12   4  -5   52.67   11.80
 -11  -3   5   16.91    5.18
 -10  -3   5  357.99   17.70
 -10  -3   5  392.65   26.20
  -9  -3   5  168.20   17.67
   8   3  -5  104.74    8.65
  -8  -3   5  107.50   13.95
  -8  -3   5  107.00    9.68
   7   3  -5  203.83   11.36
  -7  -3   5  211.06   12.36
   6   3  -5    9.89    3.76
   6   3  -5   12.62    6.80
  -6  -3   5   17.17    4.71
  -6  -3   5    8.49    5.87
   5   3  -5   27.51    4.25
   5   3  -5   20.40    6.18
  -5  -3   5   36.32    7.27
  -5  -3   5   37.76    5.71
   4   3  -5   87.93    9.15
   4   3  -5   82.33    6.61
  -4  -3   5   96.69    9.01
  -4  -3   5   86.04    7.40
   3   3  -5   34.74    6.59
   3   3  -5   48.22    5.33
  -3  -3   5   40.48    5.14
  -3  -3   5   47.67    7.05
   2   3  -5 2028.33   56.51
   2   3  -5 1714.73   59.91
  -2  -3   5 1970.65   58.12
   1   3  -5  535.25   17.96
   1   3  -5  498.40   19.10
  -1  -3   5  512.33   19.08
  -1  -3   5  537.00   18.26
   0   3  -5  239.97   11.04
   0   3  -5  243.10    9.68
   0  -3   5  236.85   10.94
   0  -3   5  228.48    9.88
  -1   3  -5 4099.41  112.65
  -1   3  -5 4009.86  111.32
   1  -3   5 3631.80  111.17
   1  -3   5 4147.32  112.59
  -2   3  -5 1390.78   39.31
  -2   3  -5 1358.92   41.33
   2  -3   5 1407.79   41.33
   2  -3   5 1234.50   39.14
  -3   3  -5  246.72   12.96
  -3   3  -5  243.56    9.19
   3  -3   5  271.53   13.38
   3  -3   5  268.38    9.73
  -4   3  -5    4.24    5.01
  -4   3  -5    5.84    1.78
   4  -3   5    6.38    2.31
   4  -3   5    2.55    4.28
  -5   3  -5  694.50   25.25
  -5   3  -5  680.94   19.55
   5  -3   5  606.35   24.96
   5  -3   5  661.76   19.67
  -6   3  -5  714.14   27.37
  -6   3  -5  693.24   20.26
  -6   3  -5  692.35   20.25
   6  -3   5  727.33   28.35
  -7   3  -5    4.55    5.85
   7  -3   5   -2.04    5.63
  -9   3  -5  232.88   17.36
 -10   3  -5    2.86    7.26
 -11   3  -5  131.45   25.53
 -12  -2   5   11.28    4.82
 -11  -2   5   20.36   10.20
 -11  -2   5   26.00    6.05
 -10  -2   5  109.09    9.88
 -10  -2   5   92.16   14.83
  -9  -2   5  192.29   18.18
  -9  -2   5  197.90   12.40
  -8  -2   5  137.65   10.34
  -8  -2   5  160.43   15.76
   7   2  -5  141.42    9.16
  -7  -2   5  142.71    9.89
  -7  -2   5  152.87   13.25
   6   2  -5   -2.41    2.42
   6   2  -5   -0.17    4.98
  -6  -2   5   -0.68    3.11
  -6  -2   5   -2.45    5.88
   5   2  -5 1661.96   50.67
   5   2  -5 1708.68   54.21
  -5  -2   5 1636.42   50.86
   4   2  -5   35.26    6.61
   4   2  -5   50.58    5.50
  -4  -2   5   35.91    5.09
  -4  -2   5   37.96    6.43
   3   2  -5 2691.11   79.69
   3   2  -5 2755.47   77.88
  -3  -2   5 2639.26   79.51
   2   2  -5  763.27   26.42
  -2  -2   5  778.06   25.17
  -2  -2   5  793.06   26.30
   1   2  -5 2536.97   71.22
   1   2  -5 2515.63   72.32
  -1  -2   5 2470.02   71.28
  -1  -2   5 2440.12   72.02
   0   2  -5 2004.31   57.46
   0   2  -5 1999.96   58.61
   0  -2   5 1988.18   58.59
   0  -2   5 2033.59   57.55
  -1   2  -5 2421.84   68.08
  -1   2  -5 2374.85   69.84
   1  -2   5 2427.03   68.14
   1  -2   5 2424.46   69.71
  -2   2  -5 1066.25   30.70
  -2   2  -5 1033.71   33.34
   2  -2   5 1077.51   30.82
   2  -2   5 1062.29   33.60
  -3   2  -5 1750.14   56.77
  -3   2  -5 1873.77   51.15
   3  -2   5 1823.93   51.17
   3  -2   5 1853.32   55.84
  -4   2  -5    2.45    4.66
   4  -2   5    5.68    5.03
  -5   2  -5  943.35   33.30
   5  -2   5  961.40   34.03
  -6   2  -5 2192.22   68.80
   6  -2   5 2194.75   69.65
  -7   2  -5   98.59   12.07
   7  -2   5   73.77   10.66
  -8   2  -5   41.06    9.77
  -9   2  -5  303.09   20.51
 -10   2  -5  449.29   26.08
 -11   2  -5    9.85    9.07
 -12  -1   5    9.22    4.78
 -11  -1   5  111.46   16.39
 -11  -1   5  105.48    9.74
 -10  -1   5  123.97   10.27
 -10  -1   5  143.62   17.18
  -9  -1   5  245.33   13.00
  -9  -1   5  224.82   18.67
  -9  -1   5  191.04   12.66
  -8  -1   5   22.68    5.25
  -8  -1   5   15.08    7.84
  -8  -1   5   29.25    6.05
   7   1  -5   12.37    3.93
  -7  -1   5    2.73    5.78
  -7  -1   5   -0.21    3.54
   6   1  -5   56.04    7.82
   6   1  -5   64.46    6.35
  -6  -1   5   83.94   10.14
  -6  -1   5   73.27    6.96
   5   1  -5    3.92    4.81
   5   1  -5    8.96    2.95
  -5  -1   5    0.19    2.93
  -5  -1   5   -2.62    3.63
   4   1  -5 1931.12   59.69
   4   1  -5 1891.36   56.13
  -4  -1   5 1872.08   58.08
  -4  -1   5 1893.17   56.39
   3   1  -5  250.84   12.94
   3   1  -5  258.12   10.98
  -3  -1   5  264.08   12.95
  -3  -1   5  251.47   11.25
   2   1  -5  986.57   31.78
   2   1  -5 1039.49   30.77
  -2  -1   5  994.10   30.77
  -2  -1   5  990.14   31.66
   1   1  -5  425.99   14.72
   1   1  -5  453.03   16.01
  -1  -1   5  458.63   15.05
  -1  -1   5  426.48   15.71
   0   1  -5 3959.01  111.05
   0  -1   5 3845.38  110.80
   0  -1   5 3983.87  109.70
  -1   1  -5 2956.93   84.08
  -1   1  -5 2886.80   81.82
   1  -1   5 2939.65   83.95
   1  -1   5 2946.20   81.89
  -2   1  -5 1619.16   48.15
  -2   1  -5 1581.78   44.66
   2  -1   5 1594.01   48.45
   2  -1   5 1572.42   44.69
  -3   1  -5 1155.13   36.39
   3  -1   5 1061.90   36.41
  -4   1  -5  280.97   14.33
   4  -1   5  243.77   14.02
  -5   1  -5  203.06   13.03
   5  -1   5  191.80   13.36
  -6   1  -5  887.09   33.95
  -7   1  -5   90.60   11.73
   7  -1   5   81.99   12.15
  -8   1  -5   17.59    8.16
  -9   1  -5   61.05   11.51
 -10   1  -5  296.51   22.40
 -11   1  -5  125.18   16.61
 -13   0   5   10.10    4.65
 -12   0   5   23.22    5.12
 -12   0   5   19.23   10.22
 -11   0   5  547.70   30.05
 -11   0   5  545.40   22.55
 -10   0   5  395.59   24.19
 -10   0   5  335.34   17.22
 -10   0   5  359.09   16.78
  -9   0   5  213.33   17.62
  -9   0   5  184.41   11.45
  -9   0   5  169.99   11.94
  -8   0   5    9.15    7.03
  -8   0   5   13.05    5.04
  -8   0   5    5.18    3.80
  -8   0   5   10.35    6.10
  -7   0   5  468.94   21.52
  -7   0   5  462.21   18.48
  -7   0   5  452.80   18.96
   6   0  -5   -3.19    3.95
  -6   0   5   -1.68    4.12
  -6   0   5   -4.23    3.21
  -6   0   5   -3.63    2.63
   5   0  -5  719.25   26.56
  -5   0   5  717.20   26.33
  -5   0   5  723.06   24.52
   4   0  -5 1036.79   31.81
  -4   0   5  968.01   32.30
  -4   0   5  997.01   33.07
   3   0  -5 2355.31   67.67
   3   0  -5 2304.79   66.50
  -3   0   5 2176.97   67.04
  -3   0   5 2347.49   66.58
   2   0  -5 2949.21   83.11
   2   0  -5 2931.57   83.69
  -2   0   5 2901.57   83.58
  -2   0   5 2910.64   83.08
   1   0  -5  302.86   11.94
  -1   0   5  324.18   11.34
  -1   0   5  300.34   11.97
   0   0  -5   39.21    4.64
   0   0   5   48.69    3.72
   0   0   5   35.90    3.88
   0   0   5   43.21    5.23
  -1   0  -5 3859.79  111.25
   1   0   5 4023.39  109.27
   1   0   5 3871.77  109.01
   1   0   5 3962.40  111.58
  -2   0  -5 1434.45   43.36
   2   0   5 1369.23   39.29
   2   0   5 1378.26   39.18
  -3   0  -5 1413.92   44.40
   3   0   5 1373.88   44.76
  -4   0  -5  197.28   12.41
   4   0   5  175.77   12.49
  -5   0  -5 2249.89   68.57
   5   0   5 2100.21   68.60
  -6   0  -5 1033.85   37.53
   6   0   5  948.87   37.46
  -7   0  -5  181.14   15.67
  -8   0  -5  265.64   19.17
  -9   0  -5    1.26    7.64
 -10   0  -5   13.32    9.14
 -13   1   5  107.92    9.50
 -12   1   5   13.74    4.74
 -12   1   5    7.33    8.86
 -11   1   5   -2.14    7.33
 -11   1   5    8.18    4.37
 -10   1   5  391.17   18.81
 -10   1   5  428.10   18.66
 -10   1   5  450.69   25.18
  -9   1   5  822.16   34.42
  -9   1   5  802.62   28.81
  -9   1   5  781.37   29.37
  -8   1   5  555.81   25.73
  -8   1   5  579.70   25.00
  -8   1   5  546.54   21.92
  -8   1   5  535.90   21.34
  -7   1   5  334.44   15.19
  -7   1   5  305.91   16.58
  -7   1   5  336.84   14.81
   6  -1  -5   51.57    7.04
  -6   1   5   57.28    7.65
  -6   1   5   50.15    5.70
  -6   1   5   55.68    6.51
   5  -1  -5   73.23    8.09
  -5   1   5   74.01    6.82
  -5   1   5   84.58    7.90
  -5   1   5   73.37    8.07
   4  -1  -5 1185.82   38.01
  -4   1   5 1188.28   37.41
  -4   1   5 1160.57   37.79
  -4   1   5 1269.67   38.12
   3  -1  -5  277.97   12.18
  -3   1   5  299.33   12.59
  -3   1   5  271.54   11.61
  -3   1   5  273.57   12.18
   2  -1  -5 2190.74   63.97
  -2   1   5 2264.09   64.09
  -2   1   5 2190.58   63.91
  -2   1   5 2230.50   64.31
   1  -1  -5   13.15    2.80
   1  -1  -5   10.26    3.05
  -1   1   5   10.73    3.33
  -1   1   5    9.73    2.90
   0  -1  -5 1818.12   50.85
   0  -1  -5 1598.71   51.44
   0   1   5 1804.26   51.86
   0   1   5 1827.61   50.86
  -1  -1  -5 1121.54   37.59
  -1  -1  -5 1381.95   40.29
   1   1   5 1395.81   37.97
   1   1   5 1322.05   40.54
  -2  -1  -5 2032.78   57.70
   2   1   5 2013.98   57.61
   2   1   5 2102.66   62.22
  -3  -1  -5    2.25    4.55
  -3  -1  -5    2.44    1.45
   3   1   5    0.94    1.37
   3   1   5    2.03    4.86
  -4  -1  -5  127.93   10.95
   4   1   5  139.79   11.61
  -5  -1  -5 2463.07   75.56
   5   1   5 2352.54   76.80
  -6  -1  -5 2694.43   84.92
   6   1   5 2715.78   86.05
  -7  -1  -5    7.72    7.09
  -8  -1  -5  525.74   27.31
  -9  -1  -5   63.51   12.21
 -10  -1  -5   -5.48    7.39
 -13   2   5  177.70   23.97
 -13   2   5  192.27   12.23
 -12   2   5  269.60   14.95
 -12   2   5  302.82   22.35
 -11   2   5   77.02    8.59
 -11   2   5   72.94   12.17
 -10   2   5  111.03   14.24
 -10   2   5  110.48    9.94
 -10   2   5  119.37    9.79
  -9   2   5  174.59   11.23
  -9   2   5  167.04   15.07
  -9   2   5  159.54   11.47
  -9   2   5  183.89   14.45
  -8   2   5  239.05   12.83
  -8   2   5  234.52   13.16
  -8   2   5  237.25   15.99
  -8   2   5  263.78   15.57
  -7   2   5  606.29   22.10
  -7   2   5  589.40   23.65
  -7   2   5  563.80   22.24
   6  -2  -5  471.96   19.23
  -6   2   5  462.79   18.04
  -6   2   5  460.43   19.01
  -6   2   5  468.65   18.55
   5  -2  -5  414.90   16.88
  -5   2   5  421.71   16.91
   4  -2  -5   -2.75    3.69
  -4   2   5    0.66    3.87
  -4   2   5   -2.78    4.03
   3  -2  -5   37.57    4.93
   3  -2  -5   46.07    5.48
  -3   2   5   48.48    5.47
   2  -2  -5 3522.45  101.01
   2  -2  -5 3468.86  100.02
  -2   2   5 3618.00  101.05
  -2   2   5 3598.10  100.11
   1  -2  -5  176.38    9.28
   1  -2  -5  222.52    9.63
  -1   2   5  217.13    9.63
  -1   2   5  221.49    9.79
   0  -2  -5  325.84   12.53
   0  -2  -5  326.80   13.46
   0   2   5  346.15   12.72
   0   2   5  341.90   14.13
  -1  -2  -5  145.72    9.94
  -1  -2  -5  147.20    7.27
   1   2   5  146.37   10.18
   1   2   5  143.47    7.22
  -2  -2  -5  229.05    8.74
  -2  -2  -5  216.63   12.11
   2   2   5  216.37   12.57
   2   2   5  216.00    8.59
  -3  -2  -5  936.44   33.10
  -3  -2  -5  942.69   28.01
   3   2   5  932.42   27.86
   3   2   5  976.84   33.86
  -4  -2  -5    2.21    1.73
  -4  -2  -5    3.83    5.42
   4   2   5    2.50    1.57
   4   2   5    7.01    5.72
  -5  -2  -5    9.97    1.96
  -5  -2  -5    6.83    6.28
   5   2   5   15.61    7.08
   5   2   5   13.22    1.81
  -6  -2  -5  393.72   21.65
  -7  -2  -5  413.22   23.47
  -8  -2  -5   -7.84    6.99
  -9  -2  -5   48.36   11.85
 -13   3   5    2.22    3.82
 -13   3   5    1.15    7.82
 -12   3   5   84.69    8.78
 -12   3   5   48.33   11.37
 -11   3   5  551.49   23.14
 -11   3   5  583.27   28.45
 -10   3   5  430.00   18.74
 -10   3   5  403.80   22.54
 -10   3   5  400.81   18.83
  -9   3   5   -1.34    3.92
  -9   3   5   -2.13    5.31
  -9   3   5    8.41    4.64
  -9   3   5    1.18    6.09
  -8   3   5  602.61   24.00
  -8   3   5  631.77   25.27
  -8   3   5  637.81   26.35
  -8   3   5  619.02   23.67
  -7   3   5  345.12   15.39
  -7   3   5  337.24   15.82
  -7   3   5  359.77   16.39
   6  -3  -5  163.97   10.13
  -6   3   5  176.95   10.26
  -6   3   5  153.74    9.96
  -6   3   5  172.67    9.99
   5  -3  -5 1007.99   32.06
   5  -3  -5  864.60   30.31
  -5   3   5  955.04   30.51
  -5   3   5  980.11   31.75
   4  -3  -5  215.03   11.25
   4  -3  -5  192.99    9.57
  -4   3   5  197.11   10.87
  -4   3   5  200.02    9.82
   3  -3  -5  217.25   10.98
   3  -3  -5  185.11    9.10
  -3   3   5  215.91   10.99
  -3   3   5  211.23    9.69
   2  -3  -5  566.65   19.06
   2  -3  -5  583.49   20.64
  -2   3   5  597.49   19.17
   1  -3  -5 2738.78   78.38
   1  -3  -5 2445.71   77.22
  -1   3   5 2780.18   77.82
  -1   3   5 2915.78   78.59
   0  -3  -5  717.29   23.97
   0  -3  -5  772.88   24.60
   0   3   5  764.81   25.12
   0   3   5  707.39   23.91
  -1  -3  -5    3.67    3.99
  -1  -3  -5    0.66    2.54
   1   3   5    2.40    2.74
  -2  -3  -5   38.76    6.06
  -2  -3  -5   42.63    4.53
   2   3   5   39.65    6.89
   2   3   5   35.46    3.88
  -3  -3  -5  586.14   23.12
  -3  -3  -5  551.54   18.16
   3   3   5  523.79   23.05
   3   3   5  544.87   18.01
  -4  -3  -5  638.09   26.43
  -4  -3  -5  655.46   20.28
   4   3   5  625.47   27.07
   4   3   5  607.56   19.85
  -5  -3  -5  230.16    9.04
  -5  -3  -5  245.51   16.59
   5   3   5  222.43   16.11
   5   3   5  224.49    8.62
  -6  -3  -5  180.48   15.97
  -6  -3  -5  191.36    7.36
   6   3   5  183.20    6.96
  -7  -3  -5  242.44   18.82
  -8  -3  -5  307.81   22.21
  -9  -3  -5   21.08   10.11
 -13   4   5   15.28    5.02
 -12   4   5    8.17    7.28
 -12   4   5    5.23    4.13
 -11   4   5  132.24   10.56
 -11   4   5  132.34   13.76
 -10   4   5   36.05    7.70
 -10   4   5   34.94    8.45
 -10   4   5   25.95    5.72
  -9   4   5   17.79    6.07
  -9   4   5   17.29    4.93
  -9   4   5   23.48    7.47
  -9   4   5   15.70    5.31
  -8   4   5 2590.97   77.89
  -8   4   5 2617.94   77.55
  -8   4   5 2489.58   78.55
  -7   4   5    9.27    4.60
  -7   4   5    5.35    4.16
   6  -4  -5  350.64   15.29
   6  -4  -5  293.47   13.62
  -6   4   5  304.85   14.83
  -6   4   5  333.68   13.81
   5  -4  -5   21.81    4.84
   5  -4  -5   12.78    3.63
  -5   4   5   14.31    3.66
  -5   4   5   12.69    4.31
   4  -4  -5   13.10    4.30
   4  -4  -5    9.18    3.05
  -4   4   5   10.86    4.06
  -4   4   5   10.25    3.49
   3  -4  -5 1372.46   43.79
   3  -4  -5 1567.82   47.10
  -3   4   5 1576.70   44.02
  -3   4   5 1561.77   46.83
   2  -4  -5  231.06   11.20
   2  -4  -5  202.91    9.08
  -2   4   5  225.66    9.51
  -2   4   5  230.47   11.28
   1  -4  -5  527.24   19.37
   1  -4  -5  612.85   21.02
  -1   4   5  620.81   20.39
  -1   4   5  615.91   21.04
   0  -4  -5  313.98   13.28
   0   4   5  340.29   14.17
  -1  -4  -5   54.30    7.07
  -1  -4  -5   60.64    5.59
   1   4   5   58.81    7.67
   1   4   5   56.78    6.21
  -2  -4  -5    5.02    5.04
  -2  -4  -5    9.38    3.21
   2   4   5   11.35    3.22
   2   4   5    4.77    4.73
  -3  -4  -5  357.83   18.01
  -3  -4  -5  357.05   13.77
   3   4   5  343.73   13.48
   3   4   5  361.29   18.62
  -4  -4  -5  248.05   10.56
  -4  -4  -5  241.53   15.91
   4   4   5  225.46    9.99
  -5  -4  -5  168.83    8.32
  -5  -4  -5  153.56   14.71
   5   4   5  168.30    7.91
  -6  -4  -5    2.28    7.23
  -6  -4  -5    9.06    2.80
   6   4   5   10.86    2.53
  -7  -4  -5  131.98   15.99
  -7  -4  -5  123.33    5.80
  -8  -4  -5   57.88   12.57
 -14   5   5   57.13   12.29
 -14   5   5   98.66    9.79
 -13   5   5   -2.33    6.73
 -13   5   5    3.56    4.61
 -12   5   5   -3.39    6.22
 -12   5   5    0.98    3.71
 -11   5   5   81.01   11.64
 -11   5   5   81.55    9.16
 -10   5   5  283.47   16.21
 -10   5   5  276.18   15.28
 -10   5   5  288.81   17.22
  -9   5   5  152.15   11.38
  -9   5   5  162.89   11.96
  -9   5   5  156.83   12.65
  -9   5   5  151.41   11.72
  -8   5   5  153.93   11.70
  -8   5   5  179.04   11.28
  -8   5   5  176.09   12.36
   7  -5  -5  106.18    9.65
  -7   5   5   95.80    8.21
  -7   5   5   98.47    9.28
  -7   5   5  104.19    9.13
   6  -5  -5   59.46    7.14
  -6   5   5   70.88    8.29
  -6   5   5   65.15    6.12
   5  -5  -5  217.53    9.24
   5  -5  -5  207.21   11.78
  -5   5   5  206.49    9.04
  -5   5   5  217.79   11.83
   4  -5  -5   21.02    4.67
   4  -5  -5   23.05    3.20
  -4   5   5   25.31    4.92
  -4   5   5   29.92    3.42
   3  -5  -5  737.41   22.89
   3  -5  -5  758.93   26.61
  -3   5   5  759.62   26.52
  -3   5   5  791.11   23.22
   2  -5  -5 1123.26   35.57
   2  -5  -5 1096.60   32.57
  -2   5   5 1052.44   35.19
  -2   5   5 1093.34   32.93
   1  -5  -5 1896.84   55.36
   1  -5  -5 1937.80   57.47
  -1   5   5 1868.45   57.09
  -1   5   5 1888.71   56.11
   0  -5  -5 2338.56   69.30
   0  -5  -5 2230.98   68.53
   0   5   5 2467.49   69.99
  -1  -5  -5   84.36    7.05
  -1  -5  -5   79.77    8.13
   1   5   5   64.01    7.95
   1   5   5   71.27    6.70
  -2  -5  -5  205.10   10.45
  -2  -5  -5  190.56   12.70
   2   5   5  206.20   10.34
   2   5   5  192.97   13.38
  -3  -5  -5   99.06    7.60
  -3  -5  -5  101.97   11.31
   3   5   5  111.74    7.52
  -4  -5  -5   96.12    7.19
  -4  -5  -5   86.60   11.14
  -4  -5  -5   79.76   10.56
   4   5   5   88.90    6.62
  -5  -5  -5  107.98   13.47
  -5  -5  -5   99.76    7.32
   5   5   5  105.98    6.72
  -6  -5  -5   -6.59    6.34
  -7  -5  -5  320.12   24.75
  -7  -5  -5  250.72   10.48
  -8  -5  -5   49.74   17.28
 -14   6   5  107.44   16.33
 -14   6   5  106.88   14.05
 -13   6   5   15.77    8.04
 -13   6   5   20.22    5.75
 -12   6   5  289.49   16.67
 -12   6   5  295.29   18.86
 -11   6   5  138.90   11.42
 -11   6   5  135.99   12.97
 -11   6   5  190.91   12.49
 -10   6   5  383.00   18.10
 -10   6   5  365.60   18.77
 -10   6   5  360.38   18.37
   9  -6  -5  176.61   13.14
  -9   6   5  174.36   11.42
  -9   6   5  160.43   12.06
   8  -6  -5  264.47   15.24
  -8   6   5  277.15   15.24
  -8   6   5  255.74   12.86
  -8   6   5  250.94   13.55
   7  -6  -5    4.24    4.53
  -7   6   5    0.96    4.45
  -7   6   5   -0.01    4.03
  -7   6   5    3.26    3.61
   6  -6  -5   -2.17    4.05
  -6   6   5   -1.70    3.19
  -6   6   5    5.25    3.07
   5  -6  -5  321.18   15.78
  -5   6   5  331.38   15.58
   4  -6  -5   26.54    5.57
  -4   6   5   27.11    5.72
   3  -6  -5    8.67    4.38
  -3   6   5   10.52    4.23
   2  -6  -5  257.12   10.28
   2  -6  -5  279.31   13.53
  -2   6   5  267.59   10.78
  -2   6   5  261.42   13.12
   1  -6  -5 2606.79   77.33
   1  -6  -5 2562.70   74.66
  -1   6   5 2603.21   75.70
  -1   6   5 2616.53   77.06
   0  -6  -5  184.81   10.81
   0  -6  -5  188.97   12.26
   0   6   5  159.32    9.84
   0   6   5  189.77   11.17
  -1  -6  -5  141.48    9.63
  -1  -6  -5  150.76   10.67
   1   6   5  141.32    9.45
  -2  -6  -5   99.35   10.25
  -2  -6  -5   79.78    7.75
  -2  -6  -5   91.63   10.25
   2   6   5   95.57    7.81
  -3  -6  -5   67.03    6.27
  -3  -6  -5   66.11    9.89
  -3  -6  -5   59.29    6.71
   3   6   5   57.15    6.60
  -4  -6  -5   11.11    7.23
  -4  -6  -5   11.62    4.20
   4   6   5   12.42    3.46
  -5  -6  -5  403.34   22.32
  -5  -6  -5  362.87   15.43
   5   6   5  349.79   14.58
  -6  -6  -5   11.88    3.97
  -6  -6  -5   23.77    9.30
   6   6   5   28.59    3.83
  -7  -6  -5   49.45   11.82
 -14   7   5  220.01   17.97
 -14   7   5  296.19   16.78
 -13   7   5   76.93   11.50
 -13   7   5   87.62   10.48
 -12   7   5   -6.96    5.29
 -12   7   5    6.67    5.08
 -11   7   5   32.36    6.16
 -11   7   5   13.30    6.26
 -11   7   5   24.57    6.65
 -10   7   5    9.49    5.46
 -10   7   5    4.54    4.31
   9  -7  -5  203.73   14.13
  -9   7   5  195.51   11.93
  -9   7   5  194.35   11.14
   8  -7  -5  139.98   11.94
  -8   7   5  155.63    8.84
  -8   7   5  148.82    9.52
   7  -7  -5  186.97   12.97
  -7   7   5  194.08    9.07
  -7   7   5  177.56   12.61
   6  -7  -5   73.45    9.20
  -6   7   5   39.57    6.60
   5  -7  -5  237.23   13.86
  -5   7   5  245.51   13.93
   4  -7  -5   61.45    7.59
  -4   7   5   67.32   12.25
   3  -7  -5 2635.32   79.61
  -3   7   5 2640.33   79.50
   2  -7  -5  110.88    6.64
   2  -7  -5  114.24    9.93
   2  -7  -5  113.21    6.64
  -2   7   5  129.47    9.86
   1  -7  -5  368.35   17.00
   1  -7  -5  366.70   15.07
   1  -7  -5  396.77   14.92
  -1   7   5  397.63   17.27
   0  -7  -5   37.91    5.80
   0  -7  -5   44.53    6.41
   0  -7  -5   38.52    6.15
   0   7   5   34.06    6.02
  -1  -7  -5    7.64    4.46
  -1  -7  -5    1.56    4.18
  -1  -7  -5   -2.19    4.42
   1   7   5    0.24    3.98
  -2  -7  -5  335.60   17.32
  -2  -7  -5  317.07   16.74
  -2  -7  -5  338.69   15.63
   2   7   5  329.56   15.25
  -3  -7  -5   82.50    8.27
  -3  -7  -5   89.37    9.62
  -3  -7  -5   82.86   10.66
   3   7   5   81.82    7.77
  -4  -7  -5   81.16   11.75
  -4  -7  -5  105.04    8.83
   4   7   5  106.78    7.74
  -5  -7  -5    3.12    3.81
  -5  -7  -5   -4.97    6.86
   5   7   5    8.24    3.59
  -6  -7  -5   58.55    6.81
  -6  -7  -5   46.94   11.72
 -13   8   5  118.58   12.60
 -13   8   5  107.54   17.57
 -12   8   5   80.24   10.25
 -12   8   5   84.23   10.28
 -11   8   5    0.41    4.84
  10  -8  -5   29.56    7.16
 -10   8   5   34.38    6.36
 -10   8   5   56.88    7.16
   9  -8  -5  234.78   15.24
  -9   8   5  195.26   10.68
  -9   8   5  213.69   10.43
   8  -8  -5  351.70   18.77
   7  -8  -5  359.33   18.71
   6  -8  -5  203.23   15.46
   5  -8  -5   58.32    8.01
  -5   8   5   74.80    9.18
   4  -8  -5  564.50   23.25
  -4   8   5  540.99   22.87
   3  -8  -5  171.39   12.17
  -3   8   5  181.33   11.97
   2  -8  -5  554.37   18.25
   2  -8  -5  554.61   23.24
  -2   8   5  572.20   23.07
   1  -8  -5    5.72    4.95
   1  -8  -5    2.79    3.27
   1  -8  -5    3.93    3.80
  -1   8   5    1.72    4.31
   0  -8  -5    7.95    4.02
   0  -8  -5    0.25    4.50
   0  -8  -5    6.11    4.60
   0   8   5   -5.67    3.71
  -1  -8  -5   40.77    6.73
  -1  -8  -5   32.55    6.23
  -1  -8  -5   29.24    6.59
   1   8   5   25.30    5.26
  -2  -8  -5   59.20    8.22
  -2  -8  -5   58.30    8.70
  -2  -8  -5   56.04    7.49
   2   8   5   68.78    7.88
  -3  -8  -5  215.73   15.75
  -3  -8  -5  219.66   13.29
   3   8   5  253.22   12.92
  -4  -8  -5   30.26    8.64
  -4  -8  -5   32.43    6.29
  -5  -8  -5   27.19    9.05
  -5  -8  -5   30.37    5.79
  -6  -8  -5   40.05   11.02
 -13   9   5   10.71    6.37
 -13   9   5    9.99    5.80
 -12   9   5  378.20   18.14
  11  -9  -5  213.68   16.25
 -11   9   5  193.74   11.96
 -11   9   5  239.19   11.17
  10  -9  -5   16.61    6.89
 -10   9   5   12.32    4.24
   9  -9  -5  246.63   16.37
   8  -9  -5    0.37    5.31
   7  -9  -5  149.08   13.08
   6  -9  -5  239.06   15.10
   5  -9  -5  613.26   25.91
   4  -9  -5   94.17   10.51
   3  -9  -5 1089.50   38.91
   2  -9  -5  273.84   15.90
   1  -9  -5   56.25    6.60
   1  -9  -5   57.05    6.44
   1  -9  -5   52.15    8.48
   0  -9  -5  257.07   15.05
   0  -9  -5  242.10   12.68
   0  -9  -5  256.98   13.08
  -1  -9  -5    0.88    4.88
  -1  -9  -5   -0.19    4.40
  -2  -9  -5    0.19    5.47
  -2  -9  -5   -2.29    4.42
  -3  -9  -5    4.00    6.48
  -3  -9  -5   12.99    5.63
  -4  -9  -5  138.40   11.27
  -4  -9  -5  161.67   15.69
  -5  -9  -5   -3.54    7.40
  -5  -9  -5   -2.14    4.09
  12 -10  -5   -1.84    5.79
  11 -10  -5  402.75   26.10
  10 -10  -5  219.40   16.35
   9 -10  -5  190.31   15.16
   8 -10  -5  197.00   15.26
   7 -10  -5   40.60    8.53
   6 -10  -5   -2.57    4.76
   5 -10  -5  140.52   12.69
   4 -10  -5   64.21    9.21
   3 -10  -5   -3.17    5.21
   2 -10  -5  315.06   17.79
   1 -10  -5  500.61   23.06
   0 -10  -5  535.29   21.07
   0 -10  -5  558.59   20.84
   0 -10  -5  539.51   24.33
  -1 -10  -5   23.10    7.15
  -1 -10  -5   41.45    7.75
  -2 -10  -5   25.14    7.34
  -2 -10  -5   16.41    6.50
  -3 -10  -5   32.69    8.97
  -3 -10  -5   42.95    7.72
  -4 -10  -5   25.75   11.08
  -4 -10  -5   20.95    6.42
  11 -11  -5   12.41    7.20
  10 -11  -5   37.48    9.27
   9 -11  -5  188.96   22.16
   8 -11  -5  251.01   17.64
   7 -11  -5  119.13   12.85
   6 -11  -5  262.63   17.39
   5 -11  -5  536.10   25.34
   4 -11  -5  187.41   14.64
   3 -11  -5  658.70   28.72
   2 -11  -5   66.72   10.40
   1 -11  -5   41.62    8.65
  -1 -11  -5  110.10   11.97
  -1 -11  -5  104.90   10.52
  -2 -11  -5  357.42   19.30
  -2 -11  -5  302.90   18.01
  10 -12  -5    7.10    7.07
   9 -12  -5  153.60   15.26
   8 -12  -5   38.02    8.89
   7 -12  -5  176.50   15.57
   6 -12  -5   67.95   17.45
   5 -12  -5  259.61   20.65
   4 -12  -5  281.19   18.91
   3 -12  -5  437.47   24.29
   2 -12  -5  189.61   20.01
   0 -12  -5    3.69    4.61
   0 -12  -5   16.42    7.48
  -1 -12  -5  229.31   16.46
   7 -13  -5  230.55   22.45
   6 -13  -5   35.92    9.58
   5 -13  -5    0.22    6.54
   4 -13  -5   45.65    9.72
   3 -13  -5  217.15   16.98
   2 -13  -5    8.27    7.68
  -1 -14   6   82.22   11.65
   0 -14   6   70.67    9.68
   1 -14   6   17.68   10.29
   1 -14   6   10.43    5.22
   2 -14   6   31.33    9.10
   3 -14   6    7.37    7.71
   3 -14   6    2.86    4.52
  -4  14  -6  144.93   10.58
   4 -14   6  148.75   15.60
  -5  14  -6   12.49    6.57
   5 -14   6   -0.12    6.52
   6 -14   6  139.28   14.96
   7 -14   6   10.33    7.83
   8 -14   6  180.64   16.17
   9 -14   6   19.96    7.44
  10 -14   6    8.80    7.24
  -3 -13   6    5.66    8.77
  -2 -13   6   41.26    9.16
  -1 -13   6  -11.51    6.31
  -1 -13   6    1.84    5.58
   0 -13   6  293.05   19.47
   1 -13   6   14.79    4.46
  -2  13  -6  162.95   12.81
   2 -13   6  147.65   14.28
   2 -13   6  127.79    9.67
  -3  13  -6    1.33    4.39
   3 -13   6    0.55    3.92
   3 -13   6    6.78    7.06
  -4  13  -6   93.10    9.04
   4 -13   6   67.97   10.54
   4 -13   6   70.23    7.41
  -5  13  -6   10.05    4.28
   5 -13   6    1.01    7.09
   5 -13   6   -6.89    2.97
  -6  13  -6    9.60    4.15
   6 -13   6   -5.19    6.15
   6 -13   6    0.76    3.48
  -7  13  -6   29.70    5.23
   7 -13   6   24.87    4.78
   7 -13   6   21.68    7.64
  -8  13  -6   32.77    5.98
   8 -13   6   17.28    4.95
   8 -13   6   27.30    7.82
  -9  13  -6  228.90   12.44
   9 -13   6  237.01   16.65
 -10  13  -6   88.49    8.02
  10 -13   6   65.28   10.58
 -11  13  -6   72.35    7.88
  -4 -12   6   -3.82    7.56
  -3 -12   6   84.52   13.46
  -3 -12   6   84.11   12.14
  -2 -12   6   -1.84    5.46
  -2 -12   6   -8.11    6.73
  -1 -12   6   94.86   12.02
   0  12  -6   27.27    7.72
   0 -12   6   12.80    6.90
   0 -12   6   33.45    5.67
  -1  12  -6  233.87   14.96
   1 -12   6  216.01   16.03
   1 -12   6  218.93   12.56
  -2  12  -6  101.55   10.72
   2 -12   6   88.33    8.50
   2 -12   6   93.06   11.42
  -3  12  -6  139.44   10.76
   3 -12   6  141.05   13.43
   3 -12   6  133.17    9.52
  -4  12  -6  198.56   11.46
   4 -12   6  191.53   15.09
   4 -12   6  177.76   10.70
  -5  12  -6  390.47   16.88
   5 -12   6  388.13   16.14
   5 -12   6  398.49   20.56
  -6  12  -6 1396.39   43.57
   6 -12   6 1300.34   43.08
   6 -12   6 1425.42   48.17
  -7  12  -6  282.84   13.82
   7 -12   6  273.43   13.56
   7 -12   6  259.22   16.96
  -8  12  -6  202.61   11.99
   8 -12   6  177.48   14.29
   8 -12   6  175.00   11.40
  -9  12  -6   25.81    5.69
   9 -12   6   22.10    7.33
   9 -12   6   12.27    5.40
 -10  12  -6   14.95    5.44
  10 -12   6    6.19    6.28
  10 -12   6   -1.73    4.73
 -11  12  -6   12.20    5.33
  11 -12   6    5.46    5.66
 -12  12  -6    5.68    5.44
  12 -12   6   -2.88    5.56
  -5 -11   6  306.78   19.69
  -5 -11   6  287.62   22.32
  -4 -11   6   82.46   11.45
  -4 -11   6   78.23   13.17
  -3 -11   6  180.69   16.21
  -3 -11   6  173.93   15.21
  -2 -11   6  348.91   19.87
   1  11  -6  127.70   13.05
  -1 -11   6  124.23   13.15
  -1 -11   6  162.48   11.42
   0  11  -6  411.98   20.66
   0 -11   6  425.07   21.51
  -1  11  -6    9.23    5.70
   1 -11   6    8.52    4.35
   1 -11   6    8.73    5.95
  -2  11  -6   56.55    7.73
   2 -11   6   53.19    7.17
   2 -11   6   43.20    8.79
  -3  11  -6   11.35    4.99
   3 -11   6    4.30    5.82
   3 -11   6    9.89    4.58
  -4  11  -6  203.01   12.09
   4 -11   6  201.20   14.69
   4 -11   6  201.40   11.20
  -5  11  -6    4.55    4.68
   5 -11   6    1.33    5.56
   5 -11   6    1.85    4.02
  -6  11  -6    9.70    4.84
   6 -11   6    3.72    4.16
   6 -11   6   12.77    6.45
  -7  11  -6    8.22    4.85
   7 -11   6   -2.26    5.24
   7 -11   6    4.46    4.17
  -8  11  -6  105.27    9.87
   8 -11   6  106.18   11.30
   8 -11   6   99.78    9.28
  -9  11  -6    9.38    5.37
   9 -11   6   -4.93    4.73
   9 -11   6    3.31    4.37
 -10  11  -6  171.96   13.02
  10 -11   6  157.92   12.43
  10 -11   6  151.43   12.53
 -11  11  -6  350.68   19.03
  11 -11   6  349.79   18.26
 -12  11  -6   33.22    8.54
  12 -11   6   47.49    7.47
  -6 -10   6   11.56    7.05
  -6 -10   6   16.66    8.90
  -5 -10   6  240.09   20.17
  -5 -10   6  256.00   17.33
  -4 -10   6  101.38   14.14
  -4 -10   6  107.27   12.34
  -3 -10   6  160.70   13.87
   2  10  -6    5.83    7.67
  -2 -10   6    1.07    5.44
   1  10  -6   49.87    8.92
  -1 -10   6   51.07    8.06
  -1 -10   6   35.79    8.10
   0  10  -6   73.16    9.25
   0 -10   6   51.51    8.92
   0 -10   6   64.11    8.45
  -1  10  -6  267.21   15.00
   1 -10   6  272.96   13.75
   1 -10   6  252.73   15.77
  -2  10  -6  121.72   10.30
   2 -10   6  109.26   10.89
   2 -10   6  121.26    9.79
  -3  10  -6   71.90    8.76
   3 -10   6   67.48    7.90
   3 -10   6   69.03   13.35
  -4  10  -6  690.15   28.30
  -4  10  -6  661.19   24.64
   4 -10   6  639.23   23.77
   4 -10   6  688.77   26.81
  -5  10  -6  488.23   20.90
  -5  10  -6  506.42   20.05
   5 -10   6  474.07   19.33
   5 -10   6  525.61   22.07
  -6  10  -6    5.48    5.08
  -6  10  -6    5.98    4.03
   6 -10   6    3.48    4.43
   6 -10   6    1.73    5.50
  -7  10  -6  111.88    9.29
  -7  10  -6  108.83   10.27
   7 -10   6  122.97   11.21
   7 -10   6  111.51    9.63
  -8  10  -6   57.87    8.38
  -8  10  -6   42.01    6.43
   8 -10   6   51.05    7.90
   8 -10   6   49.94    7.68
  -9  10  -6   31.10    7.18
  -9  10  -6   34.73    5.63
   9 -10   6   34.82    7.25
   9 -10   6   38.88    7.26
 -10  10  -6   56.27    7.17
  10 -10   6   48.89    7.51
 -11  10  -6   88.27   11.47
  11 -10   6   90.42   10.10
 -12  10  -6  281.34   18.92
  12 -10   6  299.05   15.44
  -7  -9   6   72.00   10.39
  -6  -9   6   19.80    7.25
  -6  -9   6   19.18   10.11
  -5  -9   6  223.76   18.61
  -5  -9   6  223.85   15.65
  -4  -9   6   86.00   10.56
   3   9  -6  595.82   27.41
  -3  -9   6  579.96   25.39
   2   9  -6  336.36   19.00
  -2  -9   6  335.37   17.71
  -2  -9   6  312.99   17.22
   1   9  -6  157.05   12.91
  -1  -9   6  145.32   12.03
   0   9  -6  400.94   20.50
   0   9  -6  392.42   18.92
   0  -9   6  389.03   17.75
   0  -9   6  417.02   19.21
  -1   9  -6   81.85    9.16
  -1   9  -6   78.63    8.07
   1  -9   6   62.58    8.23
   1  -9   6   75.59    8.16
  -2   9  -6 1432.78   45.31
  -2   9  -6 1389.90   45.81
   2  -9   6 1397.75   44.46
   2  -9   6 1411.80   46.45
  -3   9  -6    4.62    4.70
  -3   9  -6    4.15    3.95
   3  -9   6    3.35    5.08
   3  -9   6    2.69    4.17
  -4   9  -6  388.84   16.83
  -4   9  -6  392.78   17.46
   4  -9   6  395.67   16.35
   4  -9   6  354.78   17.48
  -5   9  -6  155.08   10.90
   5  -9   6  162.06   10.55
   5  -9   6  158.17   11.80
  -6   9  -6  185.04   12.38
  -6   9  -6  172.89   12.06
   6  -9   6  186.83   12.27
   6  -9   6  158.81   11.16
  -7   9  -6  158.39   12.38
  -7   9  -6  184.29   12.04
   7  -9   6  190.23   12.22
   7  -9   6  178.29   12.05
  -8   9  -6   -0.54    5.12
  -8   9  -6    0.09    3.52
   8  -9   6   -2.13    4.73
   8  -9   6    2.57    4.65
  -9   9  -6  428.42   20.77
   9  -9   6  454.81   19.24
   9  -9   6  428.05   21.35
 -10   9  -6    6.10    6.34
  10  -9   6   11.30    4.94
 -11   9  -6   59.39   10.09
 -11   9  -6   84.47    7.84
  11  -9   6   68.64    7.91
 -12   9  -6   62.20   10.71
 -13   9  -6  100.04   13.86
  -7  -8   6   23.63   10.31
  -7  -8   6    7.74    5.93
  -6  -8   6  162.69   13.53
  -6  -8   6  163.79   17.03
  -5  -8   6  190.24   13.88
   4   8  -6    1.43    6.48
  -4  -8   6    8.43    5.13
   3   8  -6   27.29    7.79
  -3  -8   6   36.35    7.66
  -3  -8   6   40.20    7.46
   2   8  -6  114.56    9.53
   2   8  -6  139.19   12.49
  -2  -8   6  126.47   11.14
  -2  -8   6  127.14   13.49
   1   8  -6 1431.41   48.04
   1   8  -6 1472.45   47.20
  -1  -8   6 1456.51   47.46
  -1  -8   6 1430.50   47.12
   0   8  -6  491.35   21.13
   0   8  -6  544.06   21.00
   0  -8   6  468.08   20.03
   0  -8   6  567.14   21.92
  -1   8  -6   32.21    5.38
  -1   8  -6   24.06    5.94
   1  -8   6   22.64    5.18
   1  -8   6   21.86    5.87
  -2   8  -6  658.77   24.12
  -2   8  -6  652.64   24.16
   2  -8   6  659.83   24.84
   2  -8   6  659.08   23.69
  -3   8  -6  235.74   12.31
  -3   8  -6  237.57   12.27
   3  -8   6  236.55   12.94
   3  -8   6  235.19   12.02
  -4   8  -6 1154.93   37.69
  -4   8  -6 1148.06   37.91
   4  -8   6 1142.53   37.40
   4  -8   6 1210.14   38.54
  -5   8  -6 3581.57  103.72
  -5   8  -6 3533.87  103.88
   5  -8   6 3526.13  103.94
   5  -8   6 3638.03  104.11
  -6   8  -6    2.30    5.18
  -6   8  -6    0.99    3.02
   6  -8   6    2.75    4.56
   6  -8   6    4.59    4.55
  -7   8  -6  507.70   19.70
  -7   8  -6  510.13   21.97
   7  -8   6  527.62   22.41
   7  -8   6  536.15   20.76
  -8   8  -6   17.88    3.98
  -8   8  -6   21.24    6.76
   8  -8   6   22.97    5.50
  -9   8  -6  349.47   19.09
  -9   8  -6  358.03   15.20
   9  -8   6  400.98   16.52
 -10   8  -6   72.09   10.38
 -10   8  -6   67.91    6.25
  10  -8   6   81.29    7.63
 -11   8  -6  152.96    8.40
 -11   8  -6  150.06   14.50
 -12   8  -6   15.58    2.95
 -12   8  -6    2.83    7.59
 -13   8  -6    6.10    7.80
  -9  -7   6   35.96    8.59
  -8  -7   6    1.30    8.06
  -8  -7   6    2.55    5.56
  -7  -7   6   22.51    9.60
  -7  -7   6   15.34    5.95
  -6  -7   6   19.83    8.91
  -6  -7   6   20.01    6.45
   5   7  -6  105.80   13.42
  -5  -7   6  116.36   11.11
   4   7  -6   10.49    6.79
  -4  -7   6   15.50    5.47
   3   7  -6  741.88   26.86
   3   7  -6  679.97   28.99
  -3  -7   6  704.46   27.05
  -3  -7   6  693.31   28.05
   2   7  -6  116.83   11.42
   2   7  -6  126.13    9.49
  -2  -7   6  111.54    9.87
  -2  -7   6  134.28   10.95
   1   7  -6  289.17   13.76
   1   7  -6  283.06   15.07
  -1  -7   6  266.79   14.05
  -1  -7   6  280.52   14.59
   0   7  -6 1078.44   35.62
   0   7  -6 1038.15   36.14
   0  -7   6 1119.06   36.18
  -1   7  -6   83.24    6.91
  -1   7  -6   69.14    7.64
   1  -7   6   81.63    8.21
   1  -7   6   62.31    6.92
  -2   7  -6   25.77    5.20
  -2   7  -6   47.28    5.72
   2  -7   6   27.94    5.28
   2  -7   6   32.27    5.40
  -3   7  -6   25.60    5.24
  -3   7  -6   19.49    4.08
   3  -7   6   23.74    5.15
   3  -7   6   18.81    4.77
  -4   7  -6  703.52   25.26
  -4   7  -6  687.01   24.28
   4  -7   6  729.55   24.97
   4  -7   6  700.31   25.00
  -5   7  -6 1832.86   54.85
  -5   7  -6 1786.91   56.12
   5  -7   6 1806.04   56.37
   5  -7   6 1848.57   55.24
  -6   7  -6   16.63    5.75
  -6   7  -6   15.48    3.66
   6  -7   6    9.18    4.30
   6  -7   6    4.54    4.09
  -7   7  -6  113.20    7.52
  -7   7  -6  110.44   11.07
   7  -7   6  114.59    8.73
  -8   7  -6  231.46   10.86
  -8   7  -6  235.73   15.30
   8  -7   6  252.65   11.98
   8  -7   6  228.13   15.40
  -9   7  -6   43.03    4.85
   9  -7   6   33.64    5.15
 -10   7  -6   55.55    5.14
 -10   7  -6   56.73    9.74
 -11   7  -6  155.36    7.45
 -11   7  -6  162.54   15.38
  -9  -6   6   21.58    6.58
  -8  -6   6   11.49    5.99
  -8  -6   6    3.81    9.81
  -7  -6   6   22.47    6.20
  -7  -6   6   35.37   10.53
  -6  -6   6    4.28    4.76
   5   6  -6    0.48    3.31
   5   6  -6    4.54    6.46
  -5  -6   6   -3.96    4.03
   4   6  -6  111.05   12.55
   4   6  -6   93.52    8.66
  -4  -6   6   94.10    9.86
  -4  -6   6  114.01   11.59
   3   6  -6 2163.25   69.05
   3   6  -6 2194.83   66.62
  -3  -6   6 2147.16   68.27
  -3  -6   6 2250.46   67.15
   2   6  -6  366.83   15.81
   2   6  -6  377.74   18.04
  -2  -6   6  347.41   16.96
  -2  -6   6  377.64   16.61
   1   6  -6  304.53   13.48
   1   6  -6  283.00   14.77
  -1  -6   6  281.80   14.28
  -1  -6   6  308.48   14.16
   0   6  -6    0.77    4.06
   0   6  -6   -1.10    2.46
   0  -6   6    0.48    3.53
   0  -6   6    1.89    3.84
  -1   6  -6 2457.09   70.66
  -1   6  -6 2294.61   70.84
   1  -6   6 2381.80   70.72
   1  -6   6 2433.12   70.87
  -2   6  -6 1109.63   35.19
   2  -6   6 1112.01   35.50
  -3   6  -6  901.42   28.83
  -3   6  -6  880.86   29.83
   3  -6   6  882.19   29.12
  -4   6  -6  641.81   23.73
  -4   6  -6  656.97   22.07
   4  -6   6  642.77   22.37
  -5   6  -6   69.22    8.67
  -5   6  -6   75.84    5.87
   5  -6   6   67.56    8.01
   5  -6   6   78.57    6.68
  -6   6  -6  739.83   24.26
  -6   6  -6  741.46   27.72
   6  -6   6  742.58   28.31
  -7   6  -6    2.78    5.46
   7  -6   6    1.74    3.49
   7  -6   6    0.96    5.37
  -8   6  -6   33.56    3.97
  -8   6  -6   26.22    7.32
   8  -6   6   29.92    4.59
   8  -6   6   27.12    7.55
  -9   6  -6   24.43    3.34
  -9   6  -6   25.82    8.08
   9  -6   6   26.92    4.10
 -10   6  -6  185.38    7.66
 -10   6  -6  188.69   15.85
 -10   6  -6  192.50    7.71
 -11   6  -6    1.75    7.10
 -12   6  -6   61.22   11.80
 -10  -5   6  182.46   13.62
  -9  -5   6  210.68   14.19
  -9  -5   6  243.99   21.78
  -8  -5   6   -2.05    7.15
  -8  -5   6   -3.11    4.29
  -7  -5   6   17.10    5.79
   6   5  -6   84.80    8.28
   6   5  -6   81.64   11.83
  -6  -5   6   77.79    8.77
   5   5  -6  940.27   31.98
   5   5  -6  910.16   35.76
  -5  -5   6  919.69   32.37
  -5  -5   6  881.72   34.69
   4   5  -6  941.82   36.93
   4   5  -6 1025.38   34.31
  -4  -5   6 1046.98   37.68
  -4  -5   6 1073.57   35.03
   3   5  -6   16.98    3.94
   3   5  -6   21.81    5.81
  -3  -5   6   22.22    4.77
  -3  -5   6   20.47    5.85
   2   5  -6 3192.58   91.00
   2   5  -6 3168.00   92.67
  -2  -5   6 2998.19   91.81
  -2  -5   6 3112.58   91.11
   1   5  -6   27.90    5.95
   1   5  -6   20.31    3.78
  -1  -5   6   15.48    4.99
  -1  -5   6   26.97    5.06
   0   5  -6  428.91   17.80
   0   5  -6  425.95   16.28
   0  -5   6  432.12   17.51
   0  -5   6  407.55   16.69
  -1   5  -6   57.22    6.87
  -1   5  -6   53.68    5.70
   1  -5   6   55.06    8.17
   1  -5   6   41.52    5.24
  -2   5  -6   97.94    6.69
  -2   5  -6   99.17    9.01
   2  -5   6  105.89   10.44
  -3   5  -6 2303.35   71.55
  -3   5  -6 2449.46   69.89
   3  -5   6 2404.28   70.02
   3  -5   6 2509.87   71.59
  -4   5  -6   17.74    3.07
  -4   5  -6   18.84    5.75
   4  -5   6   16.20    4.79
   4  -5   6   12.13    3.43
  -5   5  -6 1071.33   32.36
  -5   5  -6 1093.87   35.90
   5  -5   6 1032.68   32.52
   5  -5   6 1054.63   36.18
  -6   5  -6   87.58    9.85
  -6   5  -6   81.89    5.23
   6  -5   6   80.38    9.65
   6  -5   6   76.28    5.94
  -7   5  -6   89.42    5.31
  -7   5  -6  107.19   11.41
   7  -5   6   94.51    6.16
   7  -5   6  123.02   19.14
  -8   5  -6   93.40    4.92
  -8   5  -6   90.85   11.48
   8  -5   6   97.74   12.45
  -9   5  -6   34.41    8.93
  -9   5  -6   27.84    2.50
  -9   5  -6   31.55    2.62
 -10   5  -6  394.77   22.70
 -11   5  -6  191.75   17.71
 -12   5  -6   14.13    8.84
 -11  -4   6    4.38    4.88
 -10  -4   6   52.84    7.97
 -10  -4   6   38.79   11.81
  -9  -4   6  162.23   12.38
  -9  -4   6  197.81   20.93
  -8  -4   6   19.85    9.05
  -8  -4   6   17.39    5.55
   7   4  -6  297.85   14.86
  -7  -4   6  305.73   15.81
   6   4  -6   13.03   11.92
   6   4  -6    3.80    3.52
  -6  -4   6   10.93    5.22
   5   4  -6  653.44   24.59
   5   4  -6  690.89   28.74
  -5  -4   6  693.86   25.49
  -5  -4   6  696.16   28.05
   4   4  -6  544.40   20.51
   4   4  -6  551.34   23.36
  -4  -4   6  532.41   22.89
  -4  -4   6  546.86   21.04
   3   4  -6  180.25   12.02
   3   4  -6  167.30    9.29
  -3  -4   6  185.08   10.50
  -3  -4   6  164.88   11.25
   2   4  -6    9.67    3.35
   2   4  -6    5.37    4.34
  -2  -4   6    5.96    4.71
  -2  -4   6   12.26    4.29
   1   4  -6   79.59    6.60
   1   4  -6   78.66    8.92
  -1  -4   6   87.42    8.92
  -1  -4   6   87.17    7.61
   0   4  -6  739.09   23.78
   0   4  -6  685.11   24.93
  -1   4  -6 3333.48   96.07
  -1   4  -6 3301.20   97.33
   1  -4   6 3491.10   97.50
   1  -4   6 3399.75   96.31
  -2   4  -6  116.73   10.19
  -2   4  -6  131.86    7.05
   2  -4   6  131.81    7.83
  -3   4  -6 1233.21   42.05
  -3   4  -6 1358.46   39.76
   3  -4   6 1400.64   42.65
   3  -4   6 1386.90   39.97
  -4   4  -6 1839.02   55.65
  -4   4  -6 1757.19   51.94
   4  -4   6 1833.87   56.10
   4  -4   6 1798.80   52.17
  -5   4  -6  300.88   15.17
  -5   4  -6  290.74   10.55
   5  -4   6  312.87   15.82
   5  -4   6  319.24   11.08
  -6   4  -6  297.34   15.93
  -6   4  -6  268.49    9.61
   6  -4   6  291.10   16.35
   6  -4   6  285.89   10.06
  -7   4  -6   95.77    4.09
  -7   4  -6   92.64   10.92
   7  -4   6   94.15   11.90
  -9   4  -6   25.78    8.51
 -10   4  -6  305.24   20.63
 -11  -3   6  120.78   11.33
 -10  -3   6   37.08    6.99
 -10  -3   6   34.60   11.62
  -9  -3   6  198.08   13.17
  -9  -3   6  210.43   19.28
   8   3  -6   16.19    4.40
  -8  -3   6    5.88    6.98
  -8  -3   6    8.61    4.95
   7   3  -6  373.17   16.56
  -7  -3   6  369.44   17.29
   6   3  -6  298.14   17.77
   6   3  -6  275.37   13.64
  -6  -3   6  290.38   17.22
  -6  -3   6  300.01   14.68
   5   3  -6    5.01    3.25
   5   3  -6    3.55    5.24
  -5  -3   6    2.03    3.74
  -5  -3   6    2.05    4.94
   4   3  -6  256.03   12.10
   4   3  -6  285.89   15.13
  -4  -3   6  283.38   14.88
  -4  -3   6  269.07   12.87
   3   3  -6  440.26   18.91
   3   3  -6  448.22   16.83
  -3  -3   6  443.06   18.68
  -3  -3   6  433.33   17.07
   2   3  -6 4231.14  119.74
   2   3  -6 4172.97  121.49
  -2  -3   6 4225.99  120.00
  -2  -3   6 4251.57  121.20
   1   3  -6 6106.08  176.10
  -1  -3   6 6405.95  175.19
   0   3  -6   80.92    8.18
   0   3  -6   84.21    5.85
   0  -3   6   88.70    6.65
   0  -3   6   76.11    8.25
  -1   3  -6 1675.73   51.49
  -1   3  -6 1716.81   49.68
   1  -3   6 1698.12   51.36
   1  -3   6 1727.08   49.84
  -2   3  -6 2618.68   75.72
  -2   3  -6 2751.51   73.27
   2  -3   6 2363.68   72.98
  -3   3  -6   47.58    6.90
  -3   3  -6   53.64    3.95
   3  -3   6   57.87    7.35
   3  -3   6   57.87    4.65
  -4   3  -6   31.78    2.73
  -4   3  -6   23.98    5.43
   4  -3   6   25.56    6.13
   4  -3   6   30.42    3.36
  -5   3  -6   73.47    9.23
  -5   3  -6   74.31    3.32
   5  -3   6   81.85    9.32
   5  -3   6   77.33    3.69
  -6   3  -6  602.28   24.90
   6  -3   6  590.03   25.42
  -7   3  -6 1035.43   38.17
   7  -3   6 1013.04   38.87
  -8   3  -6  522.54   25.26
  -9   3  -6  193.81   16.70
 -10   3  -6    8.37    7.70
 -11   3  -6   14.77    9.05
 -12  -2   6   64.49    8.54
 -11  -2   6  327.71   17.33
 -11  -2   6  356.24   26.04
 -10  -2   6  409.70   19.20
 -10  -2   6  408.42   26.10
  -9  -2   6  334.24   22.77
   8   2  -6   92.62    8.67
  -8  -2   6   89.82    9.00
   7   2  -6  623.73   23.66
   7   2  -6  616.35   27.57
  -7  -2   6  601.73   29.03
  -7  -2   6  604.79   23.38
   6   2  -6   12.43    4.11
   6   2  -6    7.10    6.08
  -6  -2   6    2.73    7.21
  -6  -2   6   10.91    4.39
   5   2  -6    3.02    2.64
   5   2  -6   -1.14    4.25
  -5  -2   6    2.67    3.19
  -5  -2   6    5.06    4.22
   4   2  -6    2.29    4.26
   4   2  -6    6.25    2.96
  -4  -2   6    7.27    4.43
  -4  -2   6    7.88    3.46
   3   2  -6   73.83    6.34
   3   2  -6   61.88    7.69
  -3  -2   6   68.85    6.66
  -3  -2   6   70.65    8.72
   2   2  -6  547.03   20.67
   2   2  -6  515.79   19.90
  -2  -2   6  519.05   22.34
  -2  -2   6  541.03   18.91
   1   2  -6 4844.01  134.44
   1   2  -6 4753.30  135.64
  -1  -2   6 4702.79  135.56
  -1  -2   6 4862.10  134.60
   0   2  -6  940.84   30.06
   0   2  -6  916.28   28.22
   0  -2   6  898.28   28.31
   0  -2   6  940.75   29.98
  -1   2  -6   72.21    4.67
  -1   2  -6   71.00    7.89
   1  -2   6   74.50    7.78
   1  -2   6   73.90    5.09
  -2   2  -6  640.56   23.22
  -2   2  -6  653.99   19.57
   2  -2   6  618.84   25.81
   2  -2   6  638.74   19.69
  -3   2  -6   83.23    9.33
  -3   2  -6   74.46    3.78
   3  -2   6   82.63    9.24
   3  -2   6   75.85    4.20
  -4   2  -6   73.22    9.00
   4  -2   6   51.12    6.83
  -5   2  -6  890.78   31.49
   5  -2   6  824.51   31.83
  -6   2  -6   42.03    8.25
   6  -2   6   22.65   12.20
  -7   2  -6   32.96    8.42
   7  -2   6   51.72   10.26
  -8   2  -6  416.00   22.80
  -9   2  -6  482.03   25.93
 -10   2  -6   14.63    8.45
 -11   2  -6  531.16   29.71
 -12  -1   6  124.64   11.18
 -11  -1   6   49.04   12.22
 -11  -1   6   44.87    7.18
 -10  -1   6  294.80   15.72
 -10  -1   6  299.37   22.23
  -9  -1   6  636.20   24.58
  -9  -1   6  674.88   31.28
  -9  -1   6  556.59   24.54
  -8  -1   6  311.66   15.52
  -8  -1   6  313.24   16.03
   7   1  -6   85.82    7.86
   7   1  -6  107.89   11.87
  -7  -1   6  103.28    8.78
  -7  -1   6   89.38   11.07
   6   1  -6  729.42   28.78
   6   1  -6  718.40   25.51
  -6  -1   6  741.81   25.84
  -6  -1   6  706.80   28.13
   5   1  -6    2.87    4.21
   5   1  -6    1.30    2.75
  -5  -1   6    2.29    3.80
  -5  -1   6    1.99    2.99
   4   1  -6 1504.96   45.34
   4   1  -6 1450.04   47.23
  -4  -1   6 1509.19   47.18
  -4  -1   6 1479.13   45.50
   3   1  -6  514.22   18.22
   3   1  -6  518.66   25.10
  -3  -1   6  525.69   18.62
  -3  -1   6  479.35   19.61
   2   1  -6  340.80   14.71
   2   1  -6  318.07   12.70
  -2  -1   6  325.96   14.36
  -2  -1   6  348.91   13.31
   1   1  -6  640.59   20.87
   1   1  -6  667.75   22.38
  -1  -1   6  635.48   22.25
  -1  -1   6  653.97   21.09
   0   1  -6  173.82    7.61
   0   1  -6  186.94    9.86
   0  -1   6  192.30    9.93
   0  -1   6  185.99    8.00
  -1   1  -6   61.22    7.67
  -1   1  -6   66.87    4.24
   1  -1   6   70.31    7.73
   1  -1   6   64.55    4.57
   2  -1   6  249.93    8.92
   2  -1   6  266.82    9.34
   2  -1   6  257.54   13.63
  -3   1  -6 1054.95   35.43
   3  -1   6 1085.61   36.08
   3  -1   6 1063.20   29.91
  -4   1  -6   87.38    9.37
   4  -1   6  102.53    9.86
  -5   1  -6  153.49   12.13
   5  -1   6  159.28   12.65
  -6   1  -6 1370.42   47.12
   6  -1   6 1355.12   48.11
  -7   1  -6    2.25    6.52
  -8   1  -6 2073.38   69.47
  -9   1  -6   78.77   11.90
 -10   1  -6 1067.85   44.60
 -12   0   6   -4.13    7.48
 -12   0   6   13.80    4.65
 -11   0   6    3.73    4.15
 -11   0   6    2.23    7.87
 -10   0   6   89.31    9.20
 -10   0   6   75.40   12.77
  -9   0   6  420.26   23.73
  -9   0   6  408.74   18.87
  -9   0   6  381.07   17.90
  -8   0   6  111.46   11.76
  -8   0   6   93.76    9.03
  -8   0   6  109.50   11.27
   7   0  -6   -2.76    4.94
  -7   0   6    3.23    3.91
  -7   0   6    0.35    4.41
  -7   0   6    8.71    7.70
   6   0  -6  811.32   29.98
  -6   0   6  814.27   27.65
  -6   0   6  771.54   27.98
  -6   0   6  776.34   29.34
   5   0  -6  664.68   25.57
  -5   0   6  705.58   24.03
  -5   0   6  673.41   25.37
   4   0  -6  182.57   11.20
  -4   0   6  175.68    9.72
  -4   0   6  177.31   11.10
   3   0  -6  798.22   27.27
  -3   0   6  795.86   27.23
   2   0  -6    8.05    4.21
  -2   0   6   12.51    4.71
  -2   0   6   16.15    3.69
   1   0  -6   54.22    6.57
  -1   0   6   55.94    6.85
  -1   0   6   60.67    5.86
  -1   0   6   57.35    5.24
   0   0  -6  611.71   21.64
   0   0   6  639.90   19.80
   0   0   6  618.33   20.12
   0   0   6  615.84   21.44
  -1   0  -6  827.38   27.38
   1   0   6  805.28   27.35
   1   0   6  805.25   24.53
   1   0   6  788.99   24.25
  -2   0  -6   68.13    8.79
   2   0   6   78.53    9.08
   2   0   6   61.22    3.92
   2   0   6   64.29    4.25
  -3   0  -6  217.81   12.89
   3   0   6  237.75   13.61
  -4   0  -6  252.58   14.20
   4   0   6  234.71   14.21
  -5   0  -6  466.45   21.63
   5   0   6  471.48   22.84
  -6   0  -6  336.40   19.14
   6   0   6  309.40   19.07
  -7   0  -6 1662.36   57.45
  -8   0  -6    8.11    7.75
  -9   0  -6  934.65   39.97
 -10   0  -6   58.74   12.22
 -13   1   6  332.80   17.46
 -12   1   6   83.33   14.35
 -12   1   6  100.83    9.64
 -11   1   6  455.93   27.18
 -11   1   6  493.74   21.26
 -10   1   6  246.74   19.34
  -9   1   6   36.30    7.05
  -9   1   6   38.86    9.36
  -9   1   6   44.16    6.65
  -8   1   6  467.30   22.17
  -8   1   6  468.33   19.57
   7  -1  -6  237.40   14.63
  -7   1   6  232.54   14.47
  -7   1   6  243.03   13.31
  -7   1   6  227.14   12.52
   6  -1  -6  514.81   21.59
  -6   1   6  531.10   20.04
  -6   1   6  518.34   20.60
  -6   1   6  521.37   21.29
   5  -1  -6  630.41   24.29
  -5   1   6  689.27   24.14
  -5   1   6  672.13   24.35
  -5   1   6  657.72   23.36
   4  -1  -6  538.97   21.15
  -4   1   6  596.92   20.82
  -4   1   6  598.02   21.42
   3  -1  -6   23.46    5.14
  -3   1   6   26.79    5.24
  -3   1   6   20.42    5.28
  -3   1   6   34.04    5.72
   2  -1  -6  603.92   21.24
  -2   1   6  615.81   21.24
  -2   1   6  625.00   20.84
  -2   1   6  602.26   21.11
   1  -1  -6   14.13    4.46
  -1   1   6   18.29    3.52
  -1   1   6   18.90    4.92
  -1   1   6   20.93    4.30
   0  -1  -6  544.77   19.97
   0   1   6  549.14   20.00
   0   1   6  562.21   18.52
  -1  -1  -6  892.74   27.33
  -1  -1  -6  864.65   29.77
   1   1   6  884.29   27.26
   1   1   6  982.61   38.10
  -2  -1  -6  182.27   11.41
   2   1   6  194.68    7.52
   2   1   6  189.11   11.88
  -3  -1  -6 1380.29   43.75
   3   1   6 1297.21   37.81
   3   1   6 1374.40   44.50
   3   1   6 1307.18   37.82
  -4  -1  -6  585.59   24.15
   4   1   6  583.30   24.95
  -5  -1  -6  154.90   13.35
   5   1   6  130.73   13.37
  -6  -1  -6  101.95   13.00
  -7  -1  -6  199.93   17.00
  -8  -1  -6  121.01   15.29
  -9  -1  -6   19.92    9.88
 -13   2   6   -9.57    8.93
 -13   2   6   17.53    5.25
 -12   2   6   69.30    8.84
 -12   2   6   76.09   13.10
 -11   2   6   22.05    9.15
 -11   2   6   15.38    5.14
 -10   2   6  958.23   39.34
  -9   2   6  102.09   11.55
  -9   2   6  122.18   13.43
  -9   2   6  100.55    9.79
  -9   2   6  115.79   10.25
  -8   2   6  311.76   17.41
  -8   2   6  293.86   15.01
   7  -2  -6  521.43   22.24
  -7   2   6  538.72   20.85
  -7   2   6  513.39   21.17
  -7   2   6  530.34   22.08
   6  -2  -6    8.56    4.62
  -6   2   6    4.33    4.21
  -6   2   6    4.01    3.74
  -6   2   6    0.12    3.48
   5  -2  -6  149.42   11.20
  -5   2   6  165.34    9.53
  -5   2   6  158.61    9.99
  -5   2   6  160.29    9.88
   4  -2  -6 1968.49   61.62
  -4   2   6 2151.94   62.33
  -4   2   6 2114.85   61.75
  -4   2   6 2117.17   62.63
   3  -2  -6 9732.87  274.95
   3  -2  -6 9988.16  274.14
  -3   2   6 9811.63  273.87
  -3   2   6 9999.00  275.06
   2  -2  -6  534.41   19.66
   2  -2  -6  562.02   20.17
  -2   2   6  624.99   23.85
  -2   2   6  573.85   19.89
   1  -2  -6 1117.22   34.58
   1  -2  -6 1060.67   34.25
  -1   2   6 1135.26   34.50
  -1   2   6 1117.70   34.39
   0  -2  -6  138.95    7.76
   0  -2  -6  145.62    9.54
   0   2   6  156.00    9.91
   0   2   6  147.57    8.14
  -1  -2  -6  404.70   21.96
  -1  -2  -6  368.79   13.29
   1   2   6  359.35   13.20
   1   2   6  343.53   15.91
  -2  -2  -6   42.43    6.36
  -2  -2  -6   36.61    4.00
   2   2   6   38.15    6.46
   2   2   6   34.95    4.08
  -3  -2  -6   20.82    2.78
  -3  -2  -6   13.47    5.15
   3   2   6   19.40    2.66
   3   2   6   17.64    5.77
  -4  -2  -6  974.44   28.13
  -4  -2  -6 1003.78   35.46
   4   2   6  923.00   27.83
   4   2   6  960.35   36.24
  -5  -2  -6   24.84    7.36
   5   2   6   22.62    7.31
  -6  -2  -6  161.91   15.31
  -7  -2  -6  935.97   38.87
  -8  -2  -6    2.80    8.00
  -9  -2  -6   19.29    9.79
 -13   3   6  130.30   11.20
 -13   3   6  138.74   17.05
 -12   3   6  131.43   10.94
 -12   3   6  141.02   16.02
 -11   3   6   -0.36    6.40
 -11   3   6    4.16    4.51
 -10   3   6   76.52    9.01
 -10   3   6   76.07   11.57
  -9   3   6   26.83    6.20
  -9   3   6   41.10    9.09
  -9   3   6   32.52    7.51
  -9   3   6   29.63    6.52
  -8   3   6    5.01    4.25
  -8   3   6    4.99    5.16
  -8   3   6   -0.50    4.18
   7  -3  -6  430.07   19.28
  -7   3   6  471.63   19.48
  -7   3   6  447.09   18.69
  -7   3   6  440.66   19.12
   6  -3  -6  217.69   12.47
  -6   3   6  292.30   13.46
  -6   3   6  262.96   12.79
  -6   3   6  278.74   13.54
   5  -3  -6  386.41   16.32
   5  -3  -6  355.18   15.01
  -5   3   6  381.58   15.16
  -5   3   6  373.54   16.15
   4  -3  -6 3948.87  113.17
   4  -3  -6 4159.94  115.02
  -4   3   6 3828.21  114.56
  -4   3   6 4021.51  112.96
   3  -3  -6 2962.90   90.13
   3  -3  -6 3110.11   88.61
  -3   3   6 3200.14   88.67
  -3   3   6 3169.95   90.36
   2  -3  -6 1367.64   44.14
   2  -3  -6 1459.76   43.12
  -2   3   6 1462.82   44.34
  -2   3   6 1479.48   43.09
   1  -3  -6  178.49    9.63
   1  -3  -6  163.84    9.26
  -1   3   6  162.82    9.43
   0  -3  -6  204.58    9.95
   0  -3  -6  224.86   11.00
   0   3   6  221.76   11.52
   0   3   6  214.81   10.03
  -1  -3  -6  600.86   21.84
  -1  -3  -6  585.02   19.90
   1   3   6  587.52   22.56
   1   3   6  594.55   19.90
  -2  -3  -6  180.93    8.27
  -2  -3  -6  180.40   11.30
   2   3   6  160.48   11.77
   2   3   6  161.74    8.01
  -3  -3  -6  375.84   13.05
  -3  -3  -6  354.60   17.51
   3   3   6  340.06   12.66
   3   3   6  334.64   18.17
  -4  -3  -6  390.83   13.35
  -4  -3  -6  398.61   19.96
   4   3   6  371.97   13.00
   4   3   6  358.06   20.16
  -5  -3  -6 1010.99   43.05
  -5  -3  -6 1012.33   29.47
   5   3   6  962.97   29.01
  -6  -3  -6  165.99   15.89
  -7  -3  -6  584.28   29.48
  -8  -3  -6   19.88    9.70
 -13   4   6   21.63    5.90
 -12   4   6   12.65    5.30
 -12   4   6    8.88    7.73
 -11   4   6   29.29    8.36
 -11   4   6   22.91    5.94
 -10   4   6  413.50   19.26
 -10   4   6  373.07   21.33
 -10   4   6  430.01   20.71
  -9   4   6  967.37   34.89
  -9   4   6  928.05   33.85
  -9   4   6  931.27   34.62
  -9   4   6  988.74   36.38
  -8   4   6 1849.65   57.10
  -8   4   6 1759.22   57.22
  -8   4   6 1789.37   57.00
  -8   4   6 1812.71   58.03
   7  -4  -6  561.78   21.89
  -7   4   6  578.37   22.45
  -7   4   6  529.00   22.75
  -7   4   6  548.23   21.32
   6  -4  -6    5.90    3.89
   6  -4  -6   11.11    4.76
  -6   4   6    2.13    4.24
   5  -4  -6  466.26   17.25
   5  -4  -6  476.52   19.39
  -5   4   6  476.94   17.05
  -5   4   6  468.82   19.17
   4  -4  -6  436.90   17.63
   4  -4  -6  398.13   15.13
  -4   4   6  430.61   17.58
  -4   4   6  443.21   15.38
   3  -4  -6 2964.30   85.36
   3  -4  -6 2840.78   82.47
  -3   4   6 2905.68   85.13
  -3   4   6 2911.06   82.42
   2  -4  -6 1492.54   45.31
   2  -4  -6 1560.72   47.54
  -2   4   6 1497.26   47.15
  -2   4   6 1595.24   45.65
   1  -4  -6 1709.44   50.74
   1  -4  -6 1710.42   51.80
  -1   4   6 1695.09   51.66
  -1   4   6 1730.94   51.33
   0  -4  -6  332.15   13.76
   0  -4  -6  340.59   14.05
   0   4   6  336.34   13.71
  -1  -4  -6   62.47    7.61
  -1  -4  -6   73.82    6.91
   1   4   6   64.72    7.79
   1   4   6   63.30    6.03
  -2  -4  -6 1577.51   50.58
  -2  -4  -6 1600.17   47.65
   2   4   6 1572.29   51.68
  -3  -4  -6  151.99   12.42
  -3  -4  -6  128.58    7.84
   3   4   6  134.08    7.67
   3   4   6  144.84   12.88
  -4  -4  -6  245.59   10.44
  -4  -4  -6  254.89   16.44
   4   4   6  225.29   16.33
   4   4   6  226.36    9.94
  -5  -4  -6   31.22    4.02
  -5  -4  -6   34.51    9.20
   5   4   6   25.51    3.30
  -6  -4  -6    5.73    2.25
  -6  -4  -6    1.67    7.23
   6   4   6    2.70    1.78
  -7  -4  -6  352.87   23.21
  -8  -4  -6   12.76    9.34
 -13   5   6   11.53    7.59
 -13   5   6    3.70    4.34
 -12   5   6   30.28    6.71
 -12   5   6   13.08    7.40
 -11   5   6  763.33   32.13
 -11   5   6  748.46   29.72
 -10   5   6   35.55    7.00
 -10   5   6   29.97    8.01
 -10   5   6   24.29    6.21
  -9   5   6   70.71    9.07
  -9   5   6   64.97   11.46
  -9   5   6   59.18    9.28
  -8   5   6   51.52    7.87
  -8   5   6   51.41    8.09
  -8   5   6   55.07    7.18
   7  -5  -6  231.36   13.76
  -7   5   6  232.25   11.72
  -7   5   6  232.26   13.80
   6  -5  -6  901.75   29.32
   6  -5  -6  957.39   32.64
  -6   5   6  906.85   29.06
  -6   5   6  860.26   31.76
   5  -5  -6   10.28    4.27
   5  -5  -6   10.33    3.25
  -5   5   6    8.93    4.60
  -5   5   6    7.94    3.43
   4  -5  -6   33.38    3.99
   4  -5  -6   30.68    5.68
  -4   5   6   28.59    5.35
  -4   5   6   31.91    4.01
   3  -5  -6    0.86    3.45
   3  -5  -6    2.07    2.62
  -3   5   6   -3.34    2.71
  -3   5   6    2.45    3.62
   2  -5  -6   28.61    4.17
   2  -5  -6   31.93    5.29
  -2   5   6   27.25    4.24
  -2   5   6   31.24    5.49
   1  -5  -6 1112.98   35.10
   1  -5  -6 1125.91   36.69
  -1   5   6 1160.62   36.66
  -1   5   6 1134.44   35.89
   0  -5  -6 1241.83   38.36
   0  -5  -6 1175.70   38.48
   0   5   6 1221.07   39.44
  -1  -5  -6  204.56   12.33
  -1  -5  -6  224.55   11.15
   1   5   6  192.48   12.89
   1   5   6  220.66   11.03
  -2  -5  -6  623.87   22.09
  -2  -5  -6  647.94   24.91
   2   5   6  581.92   25.41
   2   5   6  603.17   21.66
  -3  -5  -6  212.00   10.61
  -3  -5  -6  214.10   14.54
   3   5   6  200.66   10.20
   3   5   6  183.68   14.55
  -4  -5  -6  186.49   15.05
  -4  -5  -6  169.69    9.44
   4   5   6  178.58    9.05
  -5  -5  -6   13.08    4.50
  -5  -5  -6   25.74    8.40
   5   5   6   23.29    3.52
  -6  -5  -6  160.03   16.22
  -6  -5  -6  172.35    8.41
   6   5   6  182.02    7.84
  -7  -5  -6  -10.80    6.78
 -13   6   6  132.13   14.63
 -13   6   6  151.09   12.65
 -12   6   6  293.66   18.80
 -12   6   6  304.22   17.46
 -11   6   6    3.94    4.78
 -11   6   6   -2.02    5.44
 -10   6   6   57.37    7.75
 -10   6   6   43.63    7.66
 -10   6   6   45.41    8.11
  -9   6   6  145.20   10.79
  -9   6   6  183.48   12.54
  -8   6   6   10.17    4.42
  -8   6   6    8.51    5.22
   7  -6  -6  446.37   20.90
  -7   6   6  482.23   17.50
  -7   6   6  466.38   18.30
  -7   6   6  485.87   21.04
   6  -6  -6  136.79   10.83
  -6   6   6  134.98    7.62
  -6   6   6  138.56   11.00
   5  -6  -6  802.27   29.29
  -5   6   6  777.63   23.92
   4  -6  -6   51.02    6.84
  -4   6   6   48.49    6.66
   3  -6  -6   45.69    4.70
   3  -6  -6   59.45    7.16
  -3   6   6   49.76    5.06
  -3   6   6   52.69    6.98
   2  -6  -6 1223.03   39.21
   2  -6  -6 1158.33   35.54
  -2   6   6 1174.03   36.21
  -2   6   6 1156.54   38.61
   1  -6  -6  375.90   16.29
   1  -6  -6  377.87   14.67
  -1   6   6  331.09   15.10
  -1   6   6  364.51   16.07
   0  -6  -6 2266.99   66.83
   0  -6  -6 2220.34   67.68
   0   6   6 2240.29   68.13
  -1  -6  -6  270.32   14.37
  -1  -6  -6  250.89   13.10
   1   6   6  255.02   12.79
   1   6   6  274.42   15.14
  -2  -6  -6   81.11    7.86
  -2  -6  -6   72.62    9.36
   2   6   6   75.74    7.43
  -3  -6  -6  430.19   17.52
  -3  -6  -6  444.04   21.34
   3   6   6  413.59   17.05
  -4  -6  -6  114.32    8.63
  -4  -6  -6  113.50   13.18
   4   6   6  135.37    8.17
  -5  -6  -6   36.91    5.25
  -5  -6  -6   48.07   10.22
  -6  -6  -6   -6.21    6.70
  -6  -6  -6    6.21    3.23
  -7  -6  -6   14.93    9.52
 -13   7   6   18.31    7.60
 -12   7   6   42.99    8.05
 -12   7   6   46.39    8.80
 -11   7   6   28.32    7.33
 -11   7   6   37.26    7.78
 -10   7   6  213.50   12.28
 -10   7   6  190.85   13.02
   9  -7  -6   55.17    9.04
  -9   7   6   49.97    7.39
  -9   7   6   45.90    6.26
   8  -7  -6    2.64    5.17
  -8   7   6    7.82    3.82
  -8   7   6   -0.78    3.89
   7  -7  -6  255.11   15.65
  -7   7   6  272.04   11.31
   6  -7  -6  222.22   14.13
  -6   7   6  226.12   13.84
   5  -7  -6  374.63   18.33
  -5   7   6  384.55   18.08
   4  -7  -6   81.28    8.93
  -4   7   6   82.30    9.27
   3  -7  -6  260.65   14.24
  -3   7   6  242.19   13.93
   2  -7  -6   59.45    7.44
   2  -7  -6   56.93    5.95
   1  -7  -6   48.51    6.03
   1  -7  -6   31.69    6.08
  -1   7   6   42.03    6.67
   0  -7  -6  117.80    9.99
   0  -7  -6  120.09    9.44
  -1  -7  -6   23.76    6.09
  -1  -7  -6   31.50    5.94
  -1  -7  -6   21.89    6.03
   1   7   6   31.17    5.68
  -2  -7  -6   48.08    7.99
  -2  -7  -6   47.72    8.26
  -2  -7  -6   39.14    6.39
   2   7   6   41.19    6.09
  -3  -7  -6  183.86   11.43
  -3  -7  -6  172.52   14.17
   3   7   6  186.96   10.67
  -4  -7  -6   66.03   10.63
  -4  -7  -6   67.67    7.67
   4   7   6   92.49    7.20
  -5  -7  -6  174.67   16.56
  -5  -7  -6  155.57   10.07
   5   7   6  176.06   11.13
  -6  -7  -6   69.50   12.41
 -13   8   6   15.03    6.69
 -13   8   6   18.71    6.22
 -12   8   6   50.10    8.59
 -12   8   6   37.26    8.32
 -11   8   6  369.08   16.31
 -11   8   6  342.40   17.28
  10  -8  -6 1101.52   41.26
 -10   8   6 1104.83   35.76
 -10   8   6 1083.17   36.33
   9  -8  -6    0.85    4.78
  -9   8   6    6.70    3.55
  -9   8   6   -1.00    3.89
   8  -8  -6   86.93   10.86
   7  -8  -6  130.22   11.95
   6  -8  -6   49.88    8.45
   5  -8  -6 1035.67   37.27
   4  -8  -6  488.33   24.57
   3  -8  -6   20.71    6.13
  -3   8   6   17.85    5.66
   2  -8  -6    4.12    3.38
   2  -8  -6    1.35    3.10
   2  -8  -6    8.12    5.06
  -2   8   6    2.54    4.46
   1  -8  -6 1054.67   36.93
  -1   8   6 1037.99   36.41
   0  -8  -6   49.35    6.85
   0  -8  -6   46.74    6.51
   0  -8  -6   50.05    7.52
   0   8   6   56.66    7.26
  -1  -8  -6  754.94   28.06
  -1  -8  -6  726.54   28.00
  -1  -8  -6  755.07   28.34
   1   8   6  741.96   27.86
  -2  -8  -6  783.71   30.56
  -2  -8  -6  790.05   29.50
  -2  -8  -6  826.00   30.86
   2   8   6  780.08   28.98
  -3  -8  -6   15.92    7.02
  -3  -8  -6   16.84    5.49
  -4  -8  -6    5.22    7.11
  -4  -8  -6   24.24    5.64
  -5  -8  -6  114.65    9.30
 -13   9   6  137.64   13.18
 -13   9   6  111.36   12.25
 -12   9   6    3.09    4.93
 -12   9   6    9.05    6.55
  11  -9  -6    8.51    6.50
 -11   9   6   11.41    4.93
  10  -9  -6   21.60    7.99
   9  -9  -6 2042.17   67.43
   8  -9  -6   57.28    8.88
   7  -9  -6  127.12   12.29
   6  -9  -6   12.72    6.04
   5  -9  -6   77.34    9.53
   4  -9  -6  101.28   10.95
   3  -9  -6   81.60    9.98
   2  -9  -6  196.71   13.70
   1  -9  -6   36.37    5.50
   1  -9  -6   37.57    7.18
   1  -9  -6   47.34    5.90
   0  -9  -6   47.81    6.27
   0  -9  -6   35.84    7.12
  -1  -9  -6  144.26   11.59
  -1  -9  -6  147.35   11.86
  -1  -9  -6  170.57   12.13
  -2  -9  -6    2.68    4.68
  -3  -9  -6  241.20   14.30
  -3  -9  -6  203.07   15.67
  -4  -9  -6   64.75    8.14
  -4  -9  -6   66.00   11.02
  11 -10  -6   15.25    6.95
   9 -10  -6   18.26    7.41
   8 -10  -6   56.21    9.67
   7 -10  -6   39.13    8.13
   6 -10  -6  289.24   17.67
   5 -10  -6   17.60    6.60
   4 -10  -6  164.39   13.26
   3 -10  -6  285.14   16.88
   2 -10  -6   -2.90    4.82
   1 -10  -6  394.57   16.08
   1 -10  -6  427.90   15.79
   1 -10  -6  398.36   20.46
  -1 -10  -6   70.67    8.72
  -1 -10  -6   82.63   10.07
  -2 -10  -6   68.34    9.40
  -2 -10  -6   59.29    9.29
  -3 -10  -6   33.48    8.76
  -3 -10  -6   30.30    7.31
  10 -11  -6   48.63    9.16
   9 -11  -6  482.73   25.08
   8 -11  -6  567.25   36.19
   7 -11  -6   31.40    8.44
   6 -11  -6   34.22    8.43
   5 -11  -6    8.25    6.63
   4 -11  -6   47.97    9.36
   3 -11  -6   68.45   10.56
   2 -11  -6  382.88   20.83
   1 -11  -6    4.87    5.46
   0 -11  -6   43.36    6.63
   0 -11  -6   37.10    8.16
  -1 -11  -6    3.09    5.77
  -1 -11  -6   -4.70    4.59
  -2 -11  -6    5.03    6.80
  -2 -11  -6   28.82    7.12
   9 -12  -6  104.67   14.23
   8 -12  -6  241.49   18.12
   7 -12  -6   13.41    7.15
   6 -12  -6  236.31   17.58
   5 -12  -6  278.22   18.71
   4 -12  -6    5.13    6.93
   3 -12  -6   14.32    7.32
   2 -12  -6   29.48    8.37
   1 -12  -6  200.29   15.81
   1 -15   7  138.55   12.54
   2 -15   7   23.10    5.92
  -1 -14   7    2.62    6.35
   1 -14   7   11.67   12.29
  -2  14  -7  108.69   11.78
   2 -14   7   71.44   11.73
  -3  14  -7  186.96   12.59
   3 -14   7  128.95   10.56
   3 -14   7  178.50   16.66
  -4  14  -7    7.55    4.53
   4 -14   7   -8.52    6.59
   4 -14   7   -9.66    3.53
  -5  14  -7  562.19   20.73
   5 -14   7  538.70   26.55
   5 -14   7  426.27   18.93
  -6  14  -7  174.37   10.36
   6 -14   7  170.53   16.21
  -7  14  -7    5.51    3.69
   7 -14   7   -1.87    6.67
  -8  14  -7  143.60    9.25
   8 -14   7  123.77   13.86
  10 -14   7   14.49    7.20
  -3 -13   7   49.72   11.18
  -2 -13   7   49.78    9.93
  -1 -13   7   -1.79    6.92
   0  13  -7    2.28    6.34
   0 -13   7   -7.05    6.00
  -1  13  -7   52.65    8.75
   1 -13   7   39.91   10.29
   1 -13   7   53.47    7.43
  -2  13  -7   81.75    9.80
   2 -13   7   54.21    7.33
   2 -13   7   61.15   10.41
  -3  13  -7  414.78   18.86
   3 -13   7  335.65   16.43
   3 -13   7  394.00   22.05
  -4  13  -7  130.79   10.53
   4 -13   7  129.50    9.88
   4 -13   7  170.21   14.87
  -5  13  -7   16.54    5.27
   5 -13   7   20.26    8.40
   5 -13   7   13.18    4.69
  -6  13  -7    6.93    4.39
   6 -13   7   -2.11    3.94
   6 -13   7    9.77    7.02
  -7  13  -7  338.94   16.27
   7 -13   7  327.49   19.66
   7 -13   7  322.11   15.34
  -8  13  -7  284.14   14.40
   8 -13   7  249.79   14.13
   8 -13   7  259.69   17.76
  -9  13  -7  100.20    9.25
   9 -13   7   67.67   10.33
 -10  13  -7  149.10   10.78
  10 -13   7  115.36   13.38
 -11  13  -7  159.85   11.26
  11 -13   7  123.74   12.96
  -4 -12   7    8.49    8.27
  -3 -12   7   -1.45    6.97
  -3 -12   7   -7.35    6.51
  -2 -12   7   29.39    9.35
   1  12  -7   37.44    9.26
  -1 -12   7   14.38    7.58
   0  12  -7   78.18   10.39
   0 -12   7   54.34    9.73
   0 -12   7   92.41    8.25
  -1  12  -7   49.57    8.41
   1 -12   7   28.72    6.06
   1 -12   7   32.90    8.48
  -2  12  -7   92.09   10.70
   2 -12   7  105.49   12.40
   2 -12   7   96.23    9.02
  -3  12  -7  464.07   20.24
   3 -12   7  470.10   19.34
   3 -12   7  473.42   23.29
  -4  12  -7   44.90    7.15
   4 -12   7   38.74    6.31
   4 -12   7   40.36    8.94
  -5  12  -7   16.87    5.41
   5 -12   7   22.60    7.40
   5 -12   7   11.46    4.99
  -6  12  -7   31.00    6.46
   6 -12   7   31.19    7.82
   6 -12   7   16.53    5.04
  -7  12  -7  107.28    9.80
   7 -12   7   79.12    8.68
   7 -12   7  102.21   12.10
  -8  12  -7  212.40   13.17
   8 -12   7  209.80   12.82
   8 -12   7  218.49   15.39
  -9  12  -7   82.55    9.17
   9 -12   7   71.47    9.28
   9 -12   7   52.34    8.82
 -10  12  -7   12.79    6.59
  10 -12   7   -0.76    5.38
 -11  12  -7    6.14    5.01
  11 -12   7   -0.45    5.16
 -12  12  -7  116.61   12.69
  12 -12   7  106.71   12.19
  -5 -11   7  231.26   17.32
  -5 -11   7  220.24   20.03
  -4 -11   7   -1.07    6.44
  -4 -11   7    7.47    7.48
  -3 -11   7  593.48   27.79
   2  11  -7   10.35    7.38
  -2 -11   7    4.10    6.37
  -1 -11   7    1.57    5.64
   0  11  -7  172.47   14.37
   0 -11   7  191.92   12.29
   0 -11   7  170.76   14.09
  -1  11  -7    9.08    5.51
   1 -11   7   16.43    5.32
   1 -11   7    9.25    6.50
  -2  11  -7   29.84    6.53
   2 -11   7   26.31    7.49
   2 -11   7   28.38    6.04
  -3  11  -7    1.87    4.72
   3 -11   7    2.61    5.43
   3 -11   7    2.35    4.33
  -4  11  -7   75.57    8.96
   4 -11   7   70.52    8.25
   4 -11   7   92.33   10.93
  -5  11  -7  401.03   18.23
   5 -11   7  408.29   19.91
   5 -11   7  364.46   16.92
  -6  11  -7  794.31   29.33
   6 -11   7  807.93   29.35
   6 -11   7  854.85   31.95
  -7  11  -7   96.40   10.00
   7 -11   7  104.58   11.45
   7 -11   7   82.93    9.38
  -8  11  -7    7.27    5.22
   8 -11   7    9.01    6.33
   8 -11   7   10.25    5.19
  -9  11  -7   24.82    6.74
   9 -11   7   12.99    6.23
   9 -11   7   18.65    6.64
 -10  11  -7  584.35   25.57
  10 -11   7  576.55   24.57
 -11  11  -7   -4.49    5.29
  11 -11   7    4.38    4.76
 -12  11  -7   74.47   11.29
  12 -11   7   83.54    9.36
  -6 -10   7  260.34   22.26
  -6 -10   7  302.25   19.04
  -5 -10   7   13.78   10.58
  -4 -10   7   18.88    7.61
   3  10  -7  390.14   22.68
  -3 -10   7  367.44   20.31
   2  10  -7    3.05    5.93
  -2 -10   7   12.98    6.07
   1  10  -7   83.08   10.46
  -1 -10   7   60.51    7.11
  -1 -10   7   82.59   10.08
   0  10  -7  100.13   11.33
   0 -10   7  112.54   10.48
   0 -10   7  121.88   12.06
  -1  10  -7    0.81    4.82
   1 -10   7    2.10    5.29
   1 -10   7    1.30    4.30
  -2  10  -7  115.67   10.60
   2 -10   7   98.24    9.52
   2 -10   7  121.25   11.38
  -3  10  -7   18.04    5.89
   3 -10   7   16.33    5.54
   3 -10   7    9.88    9.48
  -4  10  -7   74.54    9.75
   4 -10   7   72.96    8.24
   4 -10   7   76.75    9.82
  -5  10  -7   24.24    6.36
  -5  10  -7   26.53    5.69
   5 -10   7   24.52    5.91
   5 -10   7   23.03    6.50
  -6  10  -7  244.12   13.86
  -6  10  -7  230.36   13.10
   6 -10   7  216.54   13.17
   6 -10   7  243.30   14.76
  -7  10  -7  131.35   11.39
  -7  10  -7  139.62   10.13
   7 -10   7  106.27   10.53
   7 -10   7  133.07   11.66
  -8  10  -7    7.31    3.73
  -8  10  -7   -0.88    5.05
   8 -10   7    3.32    4.98
   8 -10   7    0.78    4.96
  -9  10  -7  308.14   17.41
  -9  10  -7  316.94   14.93
   9 -10   7  298.41   16.12
   9 -10   7  292.89   17.08
 -10  10  -7  494.75   20.34
 -10  10  -7  520.76   24.08
  10 -10   7  505.99   21.54
 -11  10  -7    4.78    6.34
  11 -10   7   10.66    4.90
 -12  10  -7   20.38    8.36
  12 -10   7   14.71    5.12
  -7  -9   7    4.32    6.38
  -6  -9   7   -1.56    6.96
  -6  -9   7    4.30    6.33
  -5  -9   7    9.42    6.56
   4   9  -7  123.22   14.98
  -4  -9   7  114.95   11.94
   3   9  -7    9.01    6.79
  -3  -9   7   14.66    6.49
   2   9  -7  382.32   20.04
  -2  -9   7  343.93   18.46
  -2  -9   7  320.99   18.11
   1   9  -7  101.03   11.52
  -1  -9   7  103.38   10.93
   0   9  -7  368.60   17.86
   0  -9   7  308.13   16.02
   0  -9   7  335.33   24.40
  -1   9  -7   10.10    4.56
  -1   9  -7    9.04    5.38
   1  -9   7   11.17    5.20
   1  -9   7    8.94    5.63
  -2   9  -7  426.39   18.41
  -2   9  -7  393.47   18.18
   2  -9   7  420.16   19.22
   2  -9   7  420.97   18.01
  -3   9  -7  228.88   12.74
  -3   9  -7  221.88   13.36
   3  -9   7  243.14   12.96
   3  -9   7  226.39   13.71
  -4   9  -7   49.93    6.67
  -4   9  -7   37.00    6.92
   4  -9   7   42.35    7.08
   4  -9   7   48.37    7.09
  -5   9  -7   80.66    9.00
   5  -9   7   71.30    8.42
   5  -9   7   66.62    8.22
  -6   9  -7   83.72    9.26
  -6   9  -7   79.18    9.37
   6  -9   7   82.95    9.67
   6  -9   7   69.55    8.92
  -7   9  -7  991.80   34.60
  -7   9  -7 1048.25   36.52
   7  -9   7 1009.11   36.61
   7  -9   7 1048.53   35.39
  -8   9  -7  196.25   14.03
  -8   9  -7  197.98   11.11
   8  -9   7  196.87   12.32
   8  -9   7  182.50   13.43
  -9   9  -7  546.90   21.42
   9  -9   7  593.48   22.57
 -10   9  -7   18.42    3.97
 -10   9  -7    9.71    6.81
  10  -9   7    5.38    4.41
 -11   9  -7   48.62    5.55
 -11   9  -7   21.47    8.26
  11  -9   7   38.33    5.49
 -12   9  -7   57.97   11.30
  -8  -8   7   13.00    6.89
  -7  -8   7   57.65   12.47
  -7  -8   7   49.92    9.05
  -6  -8   7   11.77    6.25
   5   8  -7  111.83   14.38
  -5  -8   7   98.66   11.44
   4   8  -7    4.56    6.61
  -4  -8   7   -1.84    5.43
   3   8  -7  383.65   20.97
  -3  -8   7  373.06   18.79
  -3  -8   7  382.16   20.36
   2   8  -7   71.31    9.70
  -2  -8   7   60.95    9.16
  -2  -8   7   61.00    8.95
   1   8  -7  318.18   17.17
   1   8  -7  295.73   14.95
  -1  -8   7  317.94   16.21
  -1  -8   7  293.58   15.92
   0   8  -7  600.07   22.22
   0   8  -7  527.12   22.61
   0  -8   7  566.42   22.53
   0  -8   7  493.63   21.28
  -1   8  -7  533.22   21.94
   1  -8   7  549.62   22.11
  -2   8  -7    1.60    2.99
  -2   8  -7    1.79    4.37
   2  -8   7    4.85    4.34
   2  -8   7    3.88    4.49
  -3   8  -7  423.64   18.69
  -3   8  -7  463.14   18.37
   3  -8   7  450.74   18.55
   3  -8   7  457.53   19.10
  -4   8  -7  252.32   12.51
  -4   8  -7  250.14   13.64
   4  -8   7  273.04   13.76
   4  -8   7  249.13   13.33
  -5   8  -7  573.66   23.13
  -5   8  -7  582.76   21.76
   5  -8   7  607.30   22.66
   5  -8   7  558.20   22.67
  -6   8  -7    9.86    3.80
  -6   8  -7   14.49    6.18
   6  -8   7   11.22    5.10
   6  -8   7    3.69    5.19
  -7   8  -7   58.54    8.97
  -7   8  -7   56.41    6.42
   7  -8   7   64.53    7.36
  -8   8  -7  142.94    8.63
  -8   8  -7  114.37   12.07
   8  -8   7  128.21    9.62
  -9   8  -7   64.25   10.01
  -9   8  -7   52.30    5.64
   9  -8   7   66.97    7.38
 -10   8  -7  180.73    9.21
 -10   8  -7  189.89   15.37
  10  -8   7  192.44   10.31
 -11   8  -7    7.62    2.52
 -11   8  -7    3.01    6.90
 -12   8  -7   -4.27    6.69
  -9  -7   7   14.01    6.49
  -8  -7   7  110.66   11.92
  -8  -7   7  126.04   17.39
  -7  -7   7   32.36    7.46
  -7  -7   7   41.81   10.65
  -6  -7   7    1.77    5.01
   5   7  -7   13.91    7.26
  -5  -7   7    7.96    5.51
   4   7  -7  499.58   28.00
  -4  -7   7  497.33   22.54
   3   7  -7  531.23   24.33
   3   7  -7  496.31   21.18
  -3  -7   7  511.78   23.24
  -3  -7   7  543.40   22.48
   2   7  -7  849.27   30.78
   2   7  -7  872.00   33.05
  -2  -7   7  900.19   31.71
  -2  -7   7  864.21   32.12
   1   7  -7   48.73    7.31
   1   7  -7   54.16    8.20
  -1  -7   7   41.90    6.97
  -1  -7   7   46.39    6.82
   0   7  -7 2303.68   67.88
   0   7  -7 2218.81   68.60
   0  -7   7 2238.00   68.05
   0  -7   7 2184.66   67.75
  -1   7  -7   82.84    7.02
  -1   7  -7   81.29    8.80
   1  -7   7   94.95    8.65
   1  -7   7   79.13    8.14
  -2   7  -7 1044.59   35.73
  -2   7  -7 1111.90   35.29
   2  -7   7 1081.11   35.61
  -3   7  -7   17.30    3.86
  -3   7  -7    5.22    4.79
   3  -7   7    5.30    3.99
  -4   7  -7    3.18    4.62
  -4   7  -7    0.42    2.48
   4  -7   7   -1.85    0.84
   4  -7   7   -4.15    3.56
  -5   7  -7  515.55   22.00
  -5   7  -7  536.09   19.69
   5  -7   7  575.67   20.70
  -6   7  -7   -0.46    2.54
  -6   7  -7    6.41    6.00
   6  -7   7   -1.92    4.94
   6  -7   7   -4.10    3.54
  -7   7  -7    2.29    5.82
  -7   7  -7    0.86    2.60
   7  -7   7    3.99    3.92
  -8   7  -7   45.72    5.09
  -8   7  -7   62.03    9.56
   8  -7   7   59.28   10.04
   8  -7   7   64.83    6.44
  -9   7  -7   66.96    5.22
  -9   7  -7   63.95   10.38
   9  -7   7   65.58    6.38
 -10   7  -7  164.28    7.72
 -10   7  -7  145.26   14.12
 -11   7  -7    9.08    7.61
 -12   7  -7   13.60    8.37
  -9  -6   7   56.18    8.96
  -8  -6   7    8.12    8.11
  -8  -6   7   -1.63    5.00
  -7  -6   7    1.80    5.03
   6   6  -7   79.56   12.12
  -6  -6   7   56.31    8.01
   5   6  -7   87.04   11.35
  -5  -6   7   75.60   10.91
   4   6  -7  841.74   30.38
   4   6  -7  819.50   33.46
  -4  -6   7  883.65   33.13
  -4  -6   7  851.19   31.15
   3   6  -7   37.58    6.55
   3   6  -7   24.95    7.09
  -3  -6   7   31.16    7.01
  -3  -6   7   37.39    6.67
   2   6  -7  184.22   12.81
   2   6  -7  179.80   10.58
  -2  -6   7  171.96   11.24
  -2  -6   7  183.04   12.33
   1   6  -7    0.76    2.81
   1   6  -7    1.53    4.46
  -1  -6   7    0.63    4.23
  -1  -6   7   -2.97    3.36
   0   6  -7   18.32    5.24
   0   6  -7   16.03    3.84
   0  -6   7   13.48    4.23
   0  -6   7   14.56    4.98
  -1   6  -7 1149.72   37.64
  -1   6  -7 1135.14   36.58
   1  -6   7 1138.79   37.40
   1  -6   7 1169.44   37.06
  -2   6  -7   60.98    5.86
  -2   6  -7   62.66    7.96
   2  -6   7   55.42    6.10
   2  -6   7   64.23    7.63
  -3   6  -7  277.36   11.92
  -3   6  -7  278.52   13.91
   3  -6   7  276.59   13.42
   3  -6   7  281.37   12.62
  -4   6  -7  737.90   24.52
  -4   6  -7  737.42   26.99
   4  -6   7  728.15   26.70
   4  -6   7  752.87   24.96
  -5   6  -7  247.76   14.03
  -5   6  -7  230.79   10.40
   5  -6   7  246.29   13.87
   5  -6   7  242.50   11.27
  -6   6  -7  192.06    9.03
  -6   6  -7  211.85   13.80
   6  -6   7  185.04   11.15
   6  -6   7  183.02   13.37
  -7   6  -7    2.73    2.19
  -7   6  -7    5.54    6.14
   7  -6   7    6.26    3.62
   7  -6   7   -0.57    5.35
  -8   6  -7    3.80    2.05
  -8   6  -7   -2.45    5.93
   8  -6   7   -0.27    2.97
  -9   6  -7  114.93   13.05
  -9   6  -7  112.69    5.49
 -10   6  -7   54.60   10.58
 -11   6  -7  154.86   16.13
 -12   6  -7   -1.36    7.51
 -10  -5   7   10.75    5.63
  -9  -5   7    6.33    9.06
  -9  -5   7    5.43    5.53
  -8  -5   7    1.82    7.59
  -8  -5   7   14.61    6.08
  -7  -5   7   45.44    7.64
   6   5  -7  217.84   16.82
  -6  -5   7  222.00   14.07
   5   5  -7 1455.67   49.52
   5   5  -7 1357.15   45.02
  -5  -5   7 1390.12   48.96
  -5  -5   7 1333.98   45.42
   4   5  -7 1548.16   58.81
   4   5  -7 1805.99   58.79
  -4  -5   7 1862.55   58.85
  -4  -5   7 1884.96   56.25
   3   5  -7   65.50    6.68
   3   5  -7   61.79    8.76
  -3  -5   7   52.03    6.64
  -3  -5   7   47.87    7.42
   2   5  -7   73.91    6.54
   2   5  -7   71.32    8.78
  -2  -5   7   69.03    8.37
  -2  -5   7   51.19    6.33
   1   5  -7  522.43   20.87
   1   5  -7  492.00   18.93
  -1  -5   7  500.32   20.12
  -1  -5   7  514.83   19.49
   0   5  -7 1658.77   50.26
   0   5  -7 1588.69   51.32
   0  -5   7 1710.78   50.73
   0  -5   7 1664.37   51.33
  -1   5  -7  565.94   21.87
  -1   5  -7  564.82   20.20
   1  -5   7  580.59   20.73
   1  -5   7  599.95   22.00
  -2   5  -7  846.30   27.32
  -2   5  -7  849.04   29.20
   2  -5   7  834.73   28.90
   2  -5   7  851.61   27.58
  -3   5  -7 2224.43   67.73
   3  -5   7 2265.66   65.61
   3  -5   7 2258.51   67.54
  -4   5  -7   13.09    5.43
  -4   5  -7   14.62    2.89
   4  -5   7   16.76    5.34
   4  -5   7   11.21    3.12
  -5   5  -7   34.09    3.69
  -5   5  -7   36.05    6.63
   5  -5   7   39.16    4.42
   5  -5   7   40.14    6.65
  -6   5  -7 1444.66   47.24
  -6   5  -7 1385.11   41.54
   6  -5   7 1391.61   47.93
   6  -5   7 1451.34   42.03
  -7   5  -7    3.65    1.76
  -7   5  -7    0.23    5.71
   7  -5   7    4.39    2.63
   7  -5   7    2.37    5.79
  -8   5  -7    1.39    6.41
  -8   5  -7    3.32    1.37
  -9   5  -7   27.02    8.25
 -10   5  -7  167.59   16.22
 -11  -4   7  544.38   24.56
 -10  -4   7    5.96    5.67
 -10  -4   7   22.33   10.54
  -9  -4   7  102.57   19.92
  -9  -4   7   94.84   10.50
  -8  -4   7   75.87    9.63
   7   4  -7  191.40   16.24
  -7  -4   7  188.03   19.31
   6   4  -7    5.01    6.64
   6   4  -7    1.28    3.48
  -6  -4   7    4.45    4.73
   5   4  -7  168.49   13.81
   5   4  -7  152.71   11.39
  -5  -4   7  168.30   11.32
  -5  -4   7  166.53   13.55
   4   4  -7  632.50   23.03
   4   4  -7  633.07   25.91
  -4  -4   7  611.23   23.41
  -4  -4   7  603.69   25.05
   3   4  -7  212.21   13.13
   3   4  -7  208.51   10.75
  -3  -4   7  195.16   12.45
  -3  -4   7  217.87   11.63
   2   4  -7 1898.44   57.89
   2   4  -7 1816.93   55.58
  -2  -4   7 1832.16   55.90
  -2  -4   7 1831.05   57.20
   1   4  -7 1704.77   50.63
   1   4  -7 1637.51   52.11
  -1  -4   7 1700.36   50.91
  -1  -4   7 1649.20   51.75
   0   4  -7   80.60    9.19
   0   4  -7   86.82    6.51
   0  -4   7   85.40    9.22
   0  -4   7   79.46    7.43
  -1   4  -7 2896.90   85.83
   1  -4   7 2875.42   84.18
   1  -4   7 3021.72   85.82
  -2   4  -7  320.22   15.52
  -2   4  -7  326.48   12.62
   2  -4   7  354.96   15.50
   2  -4   7  338.80   13.12
  -3   4  -7  246.91    9.80
  -3   4  -7  240.40   13.34
   3  -4   7  250.75   10.25
   3  -4   7  248.02   13.11
  -4   4  -7   57.37    7.53
  -4   4  -7   53.25    3.96
   4  -4   7   47.59    6.92
   4  -4   7   56.09    4.80
  -5   4  -7 1575.42   50.16
  -5   4  -7 1536.05   44.61
   5  -4   7 1532.15   50.78
   5  -4   7 1567.17   44.85
  -6   4  -7  112.44    4.84
  -6   4  -7  115.50   11.45
   6  -4   7  126.45   11.82
   6  -4   7  120.39    5.40
  -7   4  -7   30.90    7.79
   7  -4   7   24.24    8.36
  -8   4  -7   24.88    7.94
  -9   4  -7   10.08    7.62
 -10   4  -7   28.88    8.96
 -11   4  -7  222.90   19.63
 -11  -3   7   33.38    7.23
 -10  -3   7   12.54    5.70
 -10  -3   7    3.43    8.60
  -9  -3   7   85.12   14.07
  -9  -3   7   90.31   10.15
  -8  -3   7    2.95    4.68
   7   3  -7  115.28   13.21
   7   3  -7  110.50    9.07
  -7  -3   7  125.92   10.51
   6   3  -7 1343.00   45.76
   6   3  -7 1078.17   44.11
  -6  -3   7 1291.98   41.56
  -6  -3   7 1271.15   44.43
   5   3  -7 1234.86   39.59
   5   3  -7 1157.21   42.38
  -5  -3   7 1312.97   40.40
  -5  -3   7 1172.47   42.50
   4   3  -7  491.08   21.68
   4   3  -7  497.47   18.88
  -4  -3   7  511.93   21.30
  -4  -3   7  491.33   19.41
   3   3  -7   12.75    3.29
   3   3  -7   14.06    5.43
  -3  -3   7   14.55    5.28
  -3  -3   7   13.77    4.20
   2   3  -7    2.56    2.65
   2   3  -7    3.27    5.03
  -2  -3   7    4.16    3.45
  -2  -3   7    3.75    5.15
   1   3  -7 2811.97   81.97
   1   3  -7 2770.25   83.55
  -1  -3   7 2909.83   82.34
  -1  -3   7 2881.36   83.61
   0   3  -7 2285.62   69.38
   0   3  -7 2222.54   65.34
   0  -3   7 2229.40   65.60
   0  -3   7 2278.07   67.19
  -1   3  -7 6262.52  175.41
  -1   3  -7 6255.07  177.80
   1  -3   7 6493.51  177.58
   1  -3   7 6180.95  175.49
  -2   3  -7  136.68    6.61
  -2   3  -7  126.50   10.64
   2  -3   7  123.31    7.00
   2  -3   7  139.97   10.47
  -3   3  -7  365.50   16.58
  -3   3  -7  361.36   12.31
   3  -3   7  361.14   12.56
   3  -3   7  373.01   16.74
  -4   3  -7    5.75    1.62
  -4   3  -7    9.44    4.59
   4  -3   7    6.75    2.04
   4  -3   7   13.30    5.05
  -5   3  -7    8.56    1.24
  -5   3  -7   13.02    5.80
   5  -3   7    4.23    5.09
  -6   3  -7  459.83   21.66
   6  -3   7  470.05   22.45
  -7   3  -7   13.75    7.04
  -8   3  -7  131.74   14.12
  -9   3  -7    3.45    7.26
 -10   3  -7  150.13   16.25
 -11   3  -7    9.63    8.74
 -12  -2   7  110.78   11.11
 -11  -2   7    7.33    5.28
 -11  -2   7   -5.80    7.87
 -10  -2   7  160.00   12.46
 -10  -2   7  168.53   18.39
  -9  -2   7  576.79   29.75
  -9  -2   7  519.50   22.83
   8   2  -7  679.87   26.80
  -8  -2   7  705.19   26.84
   7   2  -7  129.34    9.73
   7   2  -7  138.43   18.17
  -7  -2   7  117.46   10.07
   6   2  -7   66.27    9.88
   6   2  -7   60.62    6.98
  -6  -2   7   74.37    8.22
  -6  -2   7   57.74    9.12
   5   2  -7   83.31    7.03
   5   2  -7   74.58    9.48
  -5  -2   7   82.69    9.55
  -5  -2   7   92.86    8.05
   4   2  -7  734.57   25.79
   4   2  -7  794.84   28.44
  -4  -2   7  762.81   26.33
  -4  -2   7  747.88   27.77
   3   2  -7 1036.58   33.61
   3   2  -7 1064.19   35.84
  -3  -2   7 1077.76   34.12
  -3  -2   7 1049.20   35.42
   2   2  -7  303.79   12.84
   2   2  -7  316.07   15.02
  -2  -2   7  307.93   14.89
  -2  -2   7  310.40   13.29
   1   2  -7 3181.52   91.99
  -1  -2   7 3115.82   91.89
  -1  -2   7 3212.29   90.73
   0   2  -7  167.38    8.05
   0   2  -7  171.74   11.27
   0  -2   7  174.02    8.86
   0  -2   7  158.25   12.30
  -1   2  -7  273.75   15.64
  -1   2  -7  253.28   10.06
   1  -2   7  253.53   10.43
   1  -2   7  274.89   13.79
  -2   2  -7  503.77   16.13
  -2   2  -7  529.74   20.48
   2  -2   7  496.44   16.30
   2  -2   7  490.85   20.00
  -3   2  -7  134.22   10.54
  -3   2  -7  122.53    5.19
   3  -2   7  125.06   10.51
   3  -2   7  123.08    5.49
  -4   2  -7  359.34   16.85
   4  -2   7  360.66   17.53
  -5   2  -7  286.64   16.19
   5  -2   7  306.76   16.98
  -6   2  -7  106.16   11.87
   6  -2   7   98.39   12.32
  -7   2  -7   98.42   12.67
  -8   2  -7  234.22   17.69
  -9   2  -7  327.63   21.45
 -10   2  -7  182.40   18.30
 -12  -1   7    7.34    4.64
 -11  -1   7  257.41   22.02
 -11  -1   7  213.97   14.29
 -10  -1   7   72.66   12.75
 -10  -1   7   74.00    8.87
  -9  -1   7   32.93    9.67
  -9  -1   7   29.81    6.15
   8   1  -7 1118.66   41.11
  -8  -1   7 1040.30   36.62
  -8  -1   7 1025.93   37.17
   7   1  -7  329.72   19.09
  -7  -1   7  365.80   19.07
  -7  -1   7  328.36   16.01
   6   1  -7   67.68    7.06
   6   1  -7   71.05    9.01
  -6  -1   7   70.28    8.94
  -6  -1   7   77.32    8.04
   5   1  -7  463.35   17.97
   5   1  -7  468.86   20.34
  -5  -1   7  444.35   19.77
  -5  -1   7  448.83   18.18
   4   1  -7  914.44   32.55
   4   1  -7  946.08   30.69
  -4  -1   7  942.52   32.41
  -4  -1   7  945.48   31.03
   3   1  -7  170.88   11.32
   3   1  -7  188.80    9.62
  -3  -1   7  165.26   11.36
  -3  -1   7  194.04   10.20
   2   1  -7  233.64   10.65
  -2  -1   7  236.86   12.93
   1   1  -7  196.32    9.08
   1   1  -7  182.00   11.61
  -1  -1   7  189.22    9.50
  -1  -1   7  199.71   13.17
   0   1  -7  885.15   27.47
   0   1  -7  872.07   29.93
   0  -1   7  917.94   27.81
  -1   1  -7  527.52   17.07
  -1   1  -7  557.99   22.15
   1  -1   7  528.27   20.38
   1  -1   7  498.89   17.08
  -2   1  -7  122.03   10.27
   2  -1   7  115.76   10.03
   2  -1   7  102.36    5.39
   2  -1   7  107.79    5.98
  -3   1  -7    8.94    5.00
   3  -1   7    8.40    1.60
   3  -1   7    9.66    1.84
   3  -1   7   13.11    5.09
  -4   1  -7  951.17   33.65
   4  -1   7  952.10   34.59
  -5   1  -7  312.30   17.31
   5  -1   7  334.10   22.48
  -6   1  -7 1122.18   40.78
   6  -1   7 1112.50   41.94
  -7   1  -7    6.13    7.00
  -8   1  -7  321.14   20.74
  -9   1  -7   38.90   10.11
 -10   1  -7   60.77   12.62
 -12   0   7    6.11    8.49
 -12   0   7    6.76    4.82
 -11   0   7   71.38    9.16
 -11   0   7   60.92   12.95
 -10   0   7 1886.75   65.93
 -10   0   7 1767.58   58.52
  -9   0   7   64.17    9.23
   8   0  -7  175.96   15.23
  -8   0   7  179.32   12.02
  -8   0   7  197.32   13.16
  -8   0   7  221.33   18.86
   7   0  -7   78.56    9.88
  -7   0   7   70.53    8.30
  -7   0   7   75.73    9.64
  -7   0   7   83.34    9.01
   6   0  -7 1228.12   42.28
  -6   0   7 1237.77   40.25
  -6   0   7 1238.21   42.23
  -6   0   7 1259.22   41.06
   5   0  -7 2070.85   64.04
  -5   0   7 1994.96   62.73
  -5   0   7 2126.06   62.48
  -5   0   7 2078.36   63.55
   4   0  -7  205.55   12.17
  -4   0   7  219.59   12.18
  -4   0   7  220.98   11.17
   3   0  -7 1756.45   57.30
  -3   0   7 1644.44   49.88
  -3   0   7 1566.10   50.45
   2   0  -7  627.93   22.69
  -2   0   7  652.60   23.77
  -2   0   7  602.09   23.16
  -2   0   7  620.91   22.72
   1   0  -7  212.60   11.95
  -1   0   7  206.86   10.69
  -1   0   7  198.13    9.83
  -1   0   7  198.93   11.76
   0   0  -7    2.09    5.26
   0   0   7    3.11    3.65
   0   0   7    0.05    2.99
   0   0   7    2.19    5.68
  -1   0  -7    5.39    5.12
   1   0   7    4.12    2.57
   1   0   7    8.31    5.50
   1   0   7   11.15    3.15
  -2   0  -7 2503.10   74.09
   2   0   7 2489.58   74.71
   2   0   7 2534.02   70.06
   2   0   7 2416.04   69.80
  -3   0  -7  886.83   30.18
   3   0   7  831.20   23.98
   3   0   7  819.32   23.91
   3   0   7  807.73   30.29
  -4   0  -7 1341.72   45.38
   4   0   7 1386.42   46.66
  -5   0  -7 1039.23   37.70
   5   0   7 1021.72   38.90
  -6   0  -7  229.81   19.77
  -7   0  -7    5.79    7.32
  -8   0  -7  369.90   22.55
  -9   0  -7  180.01   29.95
 -13   1   7  345.72   18.33
 -12   1   7   36.59    7.20
 -12   1   7   41.77   11.59
 -11   1   7   28.51    6.50
 -11   1   7   29.53   10.21
 -10   1   7   61.82    8.01
 -10   1   7   52.91   10.87
  -9   1   7   76.76    8.98
   8  -1  -7  109.73   12.84
  -8   1   7  101.44   10.08
  -8   1   7  102.05    9.54
  -8   1   7  112.28   11.66
   7  -1  -7   90.19   11.03
  -7   1   7   90.27   10.56
  -7   1   7   86.73    8.76
  -7   1   7   99.26    9.78
   6  -1  -7   58.32    7.68
  -6   1   7   59.23    7.91
  -6   1   7   53.42    7.04
  -6   1   7   66.03    7.47
   5  -1  -7  115.41    9.47
  -5   1   7  110.66    9.17
  -5   1   7  113.16    9.33
  -5   1   7  127.60    8.72
   4  -1  -7  637.74   23.39
  -4   1   7  626.88   23.25
  -4   1   7  634.55   23.23
  -4   1   7  661.36   22.90
   3  -1  -7 2458.12   74.13
  -3   1   7 2569.77   74.40
  -3   1   7 2482.89   74.06
  -3   1   7 2599.43   73.94
   2  -1  -7  143.90    9.73
  -2   1   7  136.97    9.30
  -2   1   7  126.75   10.06
   1  -1  -7    0.13    4.66
  -1   1   7    1.32    3.17
  -1   1   7    9.94    4.96
  -1   1   7   11.10    4.04
   0  -1  -7 3449.29  104.05
   0   1   7 3701.56  102.63
   0   1   7 3742.32  102.88
  -1  -1  -7    6.26    4.70
   1   1   7    4.87    2.55
   1   1   7   10.74    5.16
   1   1   7    0.74    2.75
  -2  -1  -7 3136.76   92.28
   2   1   7 3185.53   88.20
   2   1   7 3143.08   93.15
   2   1   7 3112.92   88.26
  -3  -1  -7   34.49    6.80
   3   1   7   28.14    6.63
   3   1   7   31.93    2.84
   3   1   7   33.33    3.05
  -4  -1  -7  186.80   13.49
   4   1   7  173.03   14.03
  -5  -1  -7  115.51   12.48
   5   1   7  104.63   12.83
  -6  -1  -7    6.52    6.70
  -7  -1  -7   12.70    7.75
  -8  -1  -7  271.14   20.11
  -9  -1  -7  200.41   18.97
 -13   2   7  123.71   21.85
 -13   2   7  109.67   11.20
 -12   2   7  172.84   20.01
 -12   2   7  194.10   13.61
 -11   2   7  153.20   16.50
 -11   2   7  157.84   12.03
 -10   2   7    2.09    4.31
 -10   2   7    0.18    6.56
  -9   2   7  181.12   12.45
  -9   2   7  178.84   15.91
   8  -2  -7   74.32   10.18
  -8   2   7   66.96    8.12
  -8   2   7   79.77    9.34
   7  -2  -7  577.45   24.38
  -7   2   7  569.99   23.57
  -7   2   7  595.50   23.97
  -7   2   7  598.14   23.05
   6  -2  -7  444.89   19.01
  -6   2   7  436.84   18.33
  -6   2   7  451.52   18.79
  -6   2   7  439.61   18.75
   5  -2  -7   57.20    7.14
  -5   2   7   58.01    7.05
  -5   2   7   49.92    6.35
  -5   2   7   54.56    6.40
   4  -2  -7    9.24    4.20
  -4   2   7    4.82    3.70
  -4   2   7    6.77    3.75
  -4   2   7    1.47    4.35
   3  -2  -7  233.35   11.66
  -3   2   7  254.18   12.52
  -3   2   7  260.04   12.06
  -3   2   7  234.41   11.90
   2  -2  -7  122.11    8.75
   2  -2  -7  140.03    8.76
  -2   2   7  131.40    9.27
  -2   2   7  131.00    8.89
   1  -2  -7  383.85   15.10
   1  -2  -7  381.14   15.73
  -1   2   7  395.44   15.79
   0  -2  -7  665.73   25.75
   0  -2  -7  711.98   23.46
   0   2   7  743.50   23.59
   0   2   7  720.59   25.13
  -1  -2  -7  763.61   24.01
  -1  -2  -7  723.98   26.09
   1   2   7  766.28   23.91
   1   2   7  725.17   26.69
  -2  -2  -7    4.53    4.56
  -2  -2  -7   -1.73    2.08
   2   2   7   -7.21    3.94
   2   2   7   -1.46    2.20
  -3  -2  -7  214.92    8.31
  -3  -2  -7  206.13   13.31
   3   2   7  200.61    8.08
   3   2   7  192.99   13.81
  -4  -2  -7 1238.16   43.75
   4   2   7 1274.94   36.03
   4   2   7 1274.73   45.15
  -6  -2  -7   35.36    8.88
  -7  -2  -7  701.31   32.16
  -8  -2  -7  155.40   23.40
  -9  -2  -7  352.21   29.92
 -13   3   7   63.45    8.83
 -13   3   7   62.65   12.17
 -12   3   7   42.32    7.54
 -12   3   7   22.85    9.33
 -11   3   7   17.71    8.29
 -11   3   7   14.30    5.81
 -10   3   7  601.03   28.31
 -10   3   7  580.60   24.53
  -9   3   7 1004.26   37.15
   8  -3  -7   76.47    9.63
  -8   3   7   46.86    7.55
  -8   3   7   60.65    7.44
  -8   3   7   56.98    8.39
   7  -3  -7  374.59   17.77
  -7   3   7  345.58   16.52
  -7   3   7  360.58   19.34
  -7   3   7  366.76   16.94
   6  -3  -7   64.53    7.82
  -6   3   7   74.96    8.09
  -6   3   7   46.70    6.21
  -6   3   7   66.56    7.41
   5  -3  -7    7.08    4.33
  -5   3   7    5.04    3.81
  -5   3   7    3.05    3.92
   4  -3  -7  278.41   12.39
   4  -3  -7  274.19   13.44
  -4   3   7  276.26   12.39
  -4   3   7  288.77   13.61
   3  -3  -7   53.79    5.77
   3  -3  -7   60.18    6.99
  -3   3   7   39.11    5.68
  -3   3   7   41.81    5.46
   2  -3  -7  192.27   10.02
   2  -3  -7  194.40   10.39
  -2   3   7  181.95   10.26
  -2   3   7  199.92   10.13
   1  -3  -7 2394.32   71.19
   1  -3  -7 2213.08   70.67
  -1   3   7 2545.53   71.36
  -1   3   7 2567.88   71.36
   0  -3  -7  362.42   15.21
   0  -3  -7  330.32   15.40
   0   3   7  390.14   14.62
   0   3   7  360.22   15.69
  -1  -3  -7  286.24   14.01
  -1  -3  -7  300.65   12.18
   1   3   7  294.18   11.99
   1   3   7  289.99   14.80
  -2  -3  -7  212.86   12.95
  -2  -3  -7  203.09    9.39
   2   3   7  201.79   13.27
   2   3   7  201.74    9.28
  -3  -3  -7  101.97   10.93
  -3  -3  -7   96.48    6.11
   3   3   7   93.58   11.43
   3   3   7   83.48    5.91
  -4  -3  -7  967.65   29.33
  -4  -3  -7 1037.04   36.99
   4   3   7  945.18   28.99
   4   3   7  941.48   37.35
  -5  -3  -7  428.54   13.68
  -5  -3  -7  468.45   23.03
   5   3   7  422.21   13.29
  -6  -3  -7  133.60   14.65
  -7  -3  -7   37.03   10.09
  -8  -3  -7  195.75   18.94
 -13   4   7   37.03    7.08
 -12   4   7  433.31   24.91
 -12   4   7  416.38   20.94
 -11   4   7   22.12    8.01
 -11   4   7   27.80    6.48
 -10   4   7   20.73    7.30
 -10   4   7   14.85    5.36
 -10   4   7   20.03    6.87
  -9   4   7  363.12   18.01
  -9   4   7  381.20   27.46
  -9   4   7  377.79   19.75
  -8   4   7   14.28    5.62
  -8   4   7   11.87    5.32
  -8   4   7   13.76    5.32
   7  -4  -7  150.41   11.48
  -7   4   7  138.60   10.81
  -7   4   7  159.24   10.57
  -7   4   7  150.65   11.45
   6  -4  -7   27.72    6.18
   6  -4  -7   27.72    5.19
  -6   4   7   24.52    5.39
  -6   4   7   32.92    5.54
   5  -4  -7  510.67   20.32
   5  -4  -7  478.30   18.04
  -5   4   7  510.10   18.30
  -5   4   7  475.78   20.11
   4  -4  -7 1081.27   33.88
   4  -4  -7 1131.53   36.59
  -4   4   7 1099.81   33.84
  -4   4   7 1047.33   36.12
   3  -4  -7   69.65    6.35
   3  -4  -7   95.56    8.04
  -3   4   7   82.71    6.75
  -3   4   7   78.06    7.74
   2  -4  -7  289.39   12.09
   2  -4  -7  286.28   13.36
  -2   4   7  288.68   12.27
  -2   4   7  266.87   12.95
   1  -4  -7 3049.00   86.77
   1  -4  -7 2939.80   87.45
  -1   4   7 2922.53   87.24
  -1   4   7 3096.06   87.38
   0  -4  -7 1904.53   56.00
   0  -4  -7 1854.77   56.06
   0   4   7 1808.35   56.86
   0   4   7 1845.36   55.57
  -1  -4  -7  525.15   21.61
  -1  -4  -7  601.01   20.56
   1   4   7  571.53   23.17
   1   4   7  585.35   20.35
  -2  -4  -7 1627.07   51.82
  -2  -4  -7 1642.25   50.06
   2   4   7 1562.49   52.82
   2   4   7 1600.01   48.29
  -3  -4  -7   53.90    5.51
  -3  -4  -7   61.47    9.04
   3   4   7   52.70    9.13
   3   4   7   53.85    5.80
  -4  -4  -7   15.61    3.55
   4   4   7   15.40    3.09
  -5  -4  -7  156.01   15.00
  -5  -4  -7  156.34    7.52
   5   4   7  161.37    7.07
  -6  -4  -7   79.57   11.99
 -13   5   7   27.17    9.02
 -13   5   7   20.61    6.44
 -12   5   7  365.56   21.87
 -12   5   7  392.34   20.20
 -11   5   7  546.93   24.09
 -11   5   7  508.28   25.29
 -10   5   7  135.54   13.12
 -10   5   7  120.21   10.99
 -10   5   7  125.85   11.34
  -9   5   7  102.67    9.91
  -9   5   7   91.08   10.85
  -9   5   7   89.71   10.13
  -8   5   7   20.53    5.49
   7  -5  -7   85.22    8.57
   7  -5  -7   57.70    8.08
  -7   5   7   57.18    6.81
  -7   5   7   65.08    8.17
   6  -5  -7  343.81   14.74
   6  -5  -7  358.42   17.14
  -6   5   7  349.86   14.46
  -6   5   7  331.11   16.66
   5  -5  -7   77.34    6.61
   5  -5  -7   92.66    9.04
  -5   5   7   86.99    8.78
  -5   5   7   86.08    7.27
   4  -5  -7  797.31   25.20
   4  -5  -7  782.20   28.50
  -4   5   7  766.75   28.28
  -4   5   7  799.20   25.08
   3  -5  -7  555.32   21.69
   3  -5  -7  534.68   18.69
  -3   5   7  560.11   21.66
  -3   5   7  554.42   18.93
   2  -5  -7  526.88   18.98
   2  -5  -7  565.05   21.38
  -2   5   7  541.01   19.46
  -2   5   7  543.39   20.93
   1  -5  -7    2.93    3.72
   1  -5  -7    3.73    3.89
  -1   5   7    2.20    3.70
   0  -5  -7  119.25    9.29
   0  -5  -7  104.46    8.29
   0   5   7  110.81    9.85
   0   5   7  105.47    8.50
  -1  -5  -7  376.41   15.94
  -1  -5  -7  385.44   17.54
   1   5   7  393.18   18.73
   1   5   7  384.25   15.92
  -2  -5  -7  873.62   29.00
  -2  -5  -7  917.05   32.22
   2   5   7  818.39   32.69
   2   5   7  841.21   28.60
  -3  -5  -7  115.61    8.22
  -3  -5  -7  123.79   12.20
   3   5   7  142.05   13.36
   3   5   7  118.22    7.88
  -4  -5  -7  216.56   10.38
  -4  -5  -7  211.36   16.06
   4   5   7  196.93    9.65
  -5  -5  -7   97.60   12.54
  -5  -5  -7  112.55    7.81
   5   5   7  112.33    8.81
  -6  -5  -7   25.83    3.22
  -6  -5  -7   31.09    9.55
  -7  -5  -7   61.56   12.44
 -13   6   7   85.89   12.79
 -13   6   7  104.95   12.13
 -12   6   7  360.48   19.61
 -12   6   7  342.91   20.35
 -11   6   7   29.22    7.62
 -11   6   7   14.88    5.99
 -10   6   7  415.58   20.40
 -10   6   7  420.48   20.77
 -10   6   7  410.78   18.96
  -9   6   7   41.04    6.36
  -9   6   7   39.60    7.51
  -9   6   7   39.83    7.27
   8  -6  -7    3.58    5.57
  -8   6   7   15.70    5.36
  -8   6   7   11.64    4.43
  -7   6   7  400.07   15.82
   6  -6  -7   58.59    5.94
   6  -6  -7   42.58    7.13
  -6   6   7   41.44    7.07
  -6   6   7   49.53    6.34
   5  -6  -7  196.12   12.66
   5  -6  -7  196.47    9.06
  -5   6   7  203.28   12.90
  -5   6   7  196.55    9.04
   4  -6  -7  233.90   13.57
   4  -6  -7  229.61    9.63
  -4   6   7  220.02   14.70
  -4   6   7  247.86   10.07
   3  -6  -7   73.10    8.34
   3  -6  -7   73.38    6.11
  -3   6   7   79.55    8.58
  -3   6   7   70.52    6.39
   2  -6  -7  801.04   28.66
   2  -6  -7  793.66   25.82
  -2   6   7  772.44   28.26
  -2   6   7  782.78   26.38
   1  -6  -7  198.57   11.78
  -1   6   7  182.21   11.31
  -1   6   7  191.26   11.54
   0  -6  -7    2.26    4.67
   0  -6  -7    0.23    3.78
   0   6   7    7.50    3.96
   0   6   7   -2.47    4.83
  -1  -6  -7  986.12   33.20
  -1  -6  -7  992.67   34.09
   1   6   7  962.48   32.80
   1   6   7  959.31   35.36
  -2  -6  -7  302.58   14.09
  -2  -6  -7  280.57   16.34
   2   6   7  268.18   16.98
   2   6   7  300.36   13.86
  -3  -6  -7   30.48    5.28
   3   6   7   32.19    4.89
  -4  -6  -7    0.28    3.40
  -4  -6  -7    7.07    6.78
   4   6   7   17.65    3.59
  -5  -6  -7  142.64    8.79
  -5  -6  -7  140.03   15.34
   5   6   7  166.97    8.27
  -6  -6  -7   53.60   11.65
 -13   7   7  122.43   13.42
 -13   7   7  137.48   12.89
 -12   7   7   55.24    9.47
 -12   7   7   29.82    7.69
 -11   7   7  274.14   17.46
 -11   7   7  263.10   16.17
 -11   7   7  313.15   14.97
 -10   7   7   83.03    8.22
 -10   7   7   69.69    9.97
 -10   7   7   59.86    8.52
   9  -7  -7 2124.82   67.56
  -9   7   7 2004.92   61.90
  -9   7   7 2063.64   63.14
   8  -7  -7   31.24    7.61
  -8   7   7   42.98    5.54
  -8   7   7   43.53    6.23
   7  -7  -7   95.94   10.65
  -7   7   7   93.09    7.11
  -7   7   7   83.28    6.73
   6  -7  -7  404.02   19.72
   5  -7  -7   72.94    9.41
  -5   7   7   64.37    9.54
   4  -7  -7  741.96   28.62
  -4   7   7  728.99   28.07
   3  -7  -7  985.36   34.86
   3  -7  -7  986.54   29.81
  -3   7   7  988.77   34.69
  -3   7   7  961.60   30.39
   2  -7  -7 1335.83   44.69
   2  -7  -7 1359.55   40.98
  -2   7   7 1344.96   41.80
  -2   7   7 1345.50   44.53
   1  -7  -7 1060.08   33.56
   1  -7  -7  964.35   35.46
  -1   7   7 1016.82   35.55
  -1   7   7 1073.41   34.82
   0  -7  -7    4.88    4.43
   0  -7  -7    2.16    4.57
   0   7   7    2.88    2.46
  -1  -7  -7  143.93   10.43
  -1  -7  -7  125.99   10.89
   1   7   7  154.03   16.23
  -2  -7  -7   91.28    8.89
  -2  -7  -7  114.35   11.60
  -2  -7  -7   96.74   11.07
   2   7   7  107.28    9.02
  -3  -7  -7 1859.39   56.52
  -3  -7  -7 1818.17   60.03
   3   7   7 1750.40   55.80
  -4  -7  -7   16.64    4.71
  -4  -7  -7   12.97    7.33
   4   7   7   11.10    3.53
  -5  -7  -7  127.97   15.38
  -5  -7  -7  144.63    9.29
  -6  -7  -7   22.49    9.62
 -13   8   7    6.77    5.82
 -13   8   7   -5.77    5.85
 -12   8   7   27.99    7.20
 -12   8   7   45.78    8.83
 -11   8   7   21.75    7.40
 -11   8   7   14.33    5.81
  10  -8  -7  252.24   17.27
 -10   8   7  281.31   12.50
 -10   8   7  225.03   12.90
   9  -8  -7  111.96   12.39
  -9   8   7   95.45    7.87
  -9   8   7  104.46    7.46
   8  -8  -7  422.51   21.40
   7  -8  -7  319.96   17.90
   6  -8  -7   48.03    8.11
   5  -8  -7  107.50   10.79
   4  -8  -7  164.40   12.61
   3  -8  -7    2.91    5.13
   2  -8  -7   52.66    5.73
   2  -8  -7   72.38   14.34
   2  -8  -7   59.64    7.03
   1  -8  -7  571.56   24.47
   1  -8  -7  615.50   22.41
   1  -8  -7  580.17   21.71
  -1   8   7  665.01   33.55
   0  -8  -7   30.01    6.29
   0  -8  -7   28.29    5.42
   0  -8  -7   27.25    6.19
  -1  -8  -7   65.14    8.59
  -1  -8  -7   71.04    8.46
  -1  -8  -7   88.62    8.99
   1   8   7   70.46    8.12
  -2  -8  -7   10.60    5.09
   2   8   7   18.75    4.66
  -3  -8  -7  306.75   15.53
  -3  -8  -7  268.48   17.83
   3   8   7  316.62   14.56
  -4  -8  -7  373.48   21.96
  -4  -8  -7  362.92   16.91
  -5  -8  -7   -2.99    7.78
 -12   9   7    0.89    4.91
 -12   9   7   14.75    6.91
 -11   9   7  192.64   10.99
  10  -9  -7   35.70    8.15
   9  -9  -7  167.76   14.64
   8  -9  -7  159.27   13.69
   7  -9  -7  111.90   12.02
   6  -9  -7   50.06    8.58
   5  -9  -7    8.58    5.99
   4  -9  -7  592.32   25.78
   3  -9  -7  995.13   36.92
   2  -9  -7   25.97    6.73
   2  -9  -7   32.51    4.44
   1  -9  -7  176.65    9.49
   1  -9  -7  153.90    9.86
   1  -9  -7  135.38   11.97
   0  -9  -7   19.75    6.21
   0  -9  -7   14.88    5.55
  -1  -9  -7  729.95   26.40
  -1  -9  -7  669.43   27.37
  -1  -9  -7  659.17   26.58
  -2  -9  -7    0.36    5.66
  -2  -9  -7    3.97    4.61
  -3  -9  -7  104.42   12.42
  -3  -9  -7  129.25   10.87
  -4  -9  -7   27.57   15.09
  -4  -9  -7   16.95    5.44
  11 -10  -7    5.81    6.16
  10 -10  -7  181.30   16.08
   9 -10  -7  547.58   32.44
   8 -10  -7  177.81   14.85
   7 -10  -7   73.32   10.19
   6 -10  -7  854.22   34.70
   5 -10  -7   -3.75    4.83
   4 -10  -7  117.69   12.86
   3 -10  -7  260.64   16.64
   2 -10  -7   17.94    6.59
   1 -10  -7   23.72    6.90
   1 -10  -7   32.44    5.18
   0 -10  -7   -4.54    4.65
   0 -10  -7   -1.51    4.55
  -1 -10  -7    9.08    5.87
  -1 -10  -7   -5.18    5.13
  -2 -10  -7   98.22   10.99
  -2 -10  -7   83.85   10.35
  -3 -10  -7   40.69    7.48
  -3 -10  -7   23.34    8.29
  10 -11  -7   86.68   12.13
   9 -11  -7   13.88    7.03
   8 -11  -7  518.11   26.21
   6 -11  -7  531.79   26.11
   5 -11  -7  142.99   13.52
   4 -11  -7  332.63   19.65
   3 -11  -7  434.21   22.54
   2 -11  -7   -1.98    5.55
   1 -11  -7   69.00   10.30
   1 -11  -7   65.46    6.38
   0 -11  -7   61.38    9.94
  -1 -11  -7   20.95    7.17
  -1 -11  -7    4.05    5.85
   7 -12  -7   27.63    7.94
   6 -12  -7   71.82   11.63
   5 -12  -7  118.13   13.89
   4 -12  -7   63.52   10.45
   3 -12  -7  420.66   23.14
   2 -12  -7   27.11    8.23
   1 -12  -7   60.07   10.07
  -3  15  -8  379.03   17.22
  -4  15  -8  228.35   12.16
  -5  15  -8  140.72    9.76
  -1 -14   8   12.61    7.32
  -1  14  -8  138.21   13.46
  -2  14  -8   54.69    8.63
   2 -14   8   27.23    8.52
  -3  14  -8   10.25    5.35
   3 -14   8   12.46    7.76
  -4  14  -8  226.83   13.64
   4 -14   8  203.25   17.05
   4 -14   8  166.07   11.96
  -5  14  -8  705.83   25.90
   5 -14   8  680.47   30.96
   5 -14   8  637.33   25.88
  -6  14  -8  272.27   14.35
   6 -14   8  248.25   18.52
  -7  14  -8   58.96    7.66
   7 -14   8   13.77    7.48
   8 -14   8    8.13    6.78
  -9  14  -8  272.07   13.14
   9 -14   8  188.52   16.57
  10 -14   8   47.29    9.38
  -3 -13   8  303.26   21.82
   1  13  -8   -4.10    5.51
  -1 -13   8   -8.20    6.57
   0  13  -8    9.97    6.38
   0 -13   8   21.21    8.75
  -1  13  -8   16.34    8.15
   1 -13   8   17.00    8.15
  -2  13  -8    3.43    5.03
   2 -13   8    2.77    7.55
  -3  13  -8  278.64   15.90
   3 -13   8  296.66   19.31
   3 -13   8  280.15   15.12
  -4  13  -8   29.34    6.67
   4 -13   8   14.89    7.56
   4 -13   8   32.81    6.38
  -5  13  -8  787.11   28.93
   5 -13   8  725.54   27.70
   5 -13   8  778.65   32.48
  -6  13  -8    0.93    4.01
   6 -13   8    3.50    4.46
   6 -13   8    2.61    6.66
  -7  13  -8   72.19    8.74
   7 -13   8   52.04    9.86
   7 -13   8   44.54    7.47
  -8  13  -8   21.46    5.60
   8 -13   8   10.25    6.73
  -9  13  -8  232.83   13.93
   9 -13   8  182.78   15.58
 -10  13  -8   67.30    8.02
  10 -13   8   10.38    6.64
  11 -13   8   11.81    6.17
  -4 -12   8  151.82   17.35
  -3 -12   8  166.37   15.58
   2  12  -8   45.36   10.51
  -2 -12   8   32.65    8.85
   1  12  -8  105.96   13.19
   0  12  -8  129.18   12.90
   0 -12   8  111.80   12.94
  -1  12  -8   68.14    9.73
   1 -12   8   59.36    9.79
   1 -12   8   88.34    8.98
  -2  12  -8    0.64    5.05
   2 -12   8    6.06    6.26
  -3  12  -8  199.57   13.54
   3 -12   8  194.47   14.87
   3 -12   8  205.96   12.59
  -4  12  -8   14.23    5.81
   4 -12   8   11.24    6.87
   4 -12   8    8.43    5.03
  -5  12  -8   64.66    8.31
   5 -12   8   68.77   10.26
   5 -12   8   52.35    7.55
  -6  12  -8   41.57    7.28
   6 -12   8   26.66    6.12
   6 -12   8   43.84    8.71
  -7  12  -8   66.38    8.42
   7 -12   8   55.28    7.95
   7 -12   8   60.54    9.19
  -8  12  -8  188.80   12.70
   8 -12   8  140.83   11.80
   8 -12   8  171.13   13.68
  -9  12  -8   34.66    7.14
   9 -12   8   31.18    7.40
   9 -12   8   21.72    7.53
 -10  12  -8  215.11   14.59
  10 -12   8  180.44   13.93
 -11  12  -8  210.31   14.96
  11 -12   8  177.90   13.34
  -5 -11   8   56.23   13.07
  -4 -11   8  120.72   13.89
   3  11  -8  131.82   15.40
  -3 -11   8  142.09   21.37
   2  11  -8   57.77   10.19
  -2 -11   8   43.18    9.29
   1  11  -8   10.10    6.50
  -1 -11   8    2.54    6.40
   0  11  -8   58.22    9.58
   0 -11   8   60.28    9.64
   0 -11   8   79.63    8.86
  -1  11  -8  319.76   17.82
   1 -11   8  304.56   16.21
   1 -11   8  340.54   18.84
  -2  11  -8  114.76   11.26
   2 -11   8  119.63   12.69
   2 -11   8  125.08   10.57
  -3  11  -8   -1.89    4.62
   3 -11   8    5.29    6.01
   3 -11   8    5.11    4.96
  -4  11  -8   13.01    5.93
   4 -11   8    3.26    5.75
   4 -11   8    9.67    5.20
  -5  11  -8   52.49    7.93
   5 -11   8   42.81    7.09
   5 -11   8   37.21    8.00
  -6  11  -8  124.34   11.08
   6 -11   8  115.48   10.18
   6 -11   8  136.91   12.66
  -7  11  -8  144.14   11.45
   7 -11   8  111.19   11.73
   7 -11   8   93.10   11.79
  -8  11  -8    4.33    5.33
   8 -11   8   -2.05    4.64
   8 -11   8    0.91    5.55
  -9  11  -8   73.38   11.31
   9 -11   8   79.90    9.74
 -10  11  -8  281.91   17.65
  10 -11   8  302.79   16.10
 -11  11  -8   21.41    7.34
  11 -11   8   26.89    6.09
 -12  11  -8   28.03    8.61
  -6 -10   8   45.20    9.55
  -5 -10   8   53.03    9.89
   4  10  -8  521.12   28.01
  -4 -10   8  504.12   24.90
   3  10  -8  356.96   21.98
  -3 -10   8  382.64   20.67
   2  10  -8  235.57   16.74
  -2 -10   8  199.91   15.39
   1  10  -8   22.04    7.34
  -1 -10   8   28.51    5.98
  -1 -10   8   20.79    6.83
   0  10  -8   -0.40    5.47
   0 -10   8    7.92    4.69
   0 -10   8    0.59    5.17
  -1  10  -8    7.39    5.91
   1 -10   8   20.65    6.36
   1 -10   8   12.19    6.08
  -2  10  -8  550.48   23.01
   2 -10   8  532.66   21.93
   2 -10   8  506.37   23.01
  -3  10  -8  262.00   15.08
   3 -10   8  234.85   13.79
   3 -10   8  243.61   15.31
  -4  10  -8   28.57    6.69
   4 -10   8   29.54   10.99
   4 -10   8   30.85    6.51
  -5  10  -8  500.72   21.21
  -5  10  -8  447.72   21.12
   5 -10   8  476.55   20.64
   5 -10   8  515.21   21.81
  -6  10  -8   40.85    7.43
  -6  10  -8   32.05    5.54
   6 -10   8   36.06    7.21
   6 -10   8   33.44    7.52
  -7  10  -8  224.79   12.48
  -7  10  -8  206.05   14.34
   7 -10   8  214.38   13.93
   7 -10   8  228.78   15.53
  -8  10  -8  456.52   18.96
  -8  10  -8  421.26   20.80
   8 -10   8  468.95   20.46
   8 -10   8  433.41   21.42
  -9  10  -8   66.49   10.18
  -9  10  -8   60.09    6.43
   9 -10   8   78.84    8.95
 -10  10  -8   94.02    7.41
 -10  10  -8   99.09   12.01
  10 -10   8   82.56    9.17
 -11  10  -8   20.69    8.29
  11 -10   8   14.59    5.30
 -12  10  -8   83.80   19.16
  -7  -9   8   85.86   11.34
   5   9  -8   84.70   12.85
  -5  -9   8   82.66   10.97
   4   9  -8    3.55    6.80
  -4  -9   8   -1.86    5.71
   3   9  -8  654.87   29.84
  -3  -9   8  671.70   27.96
   2   9  -8  301.82   18.93
  -2  -9   8  275.79   16.45
   1   9  -8  105.53   12.01
  -1  -9   8  111.58   11.00
  -1  -9   8   97.66   10.88
   0   9  -8   30.01    7.28
   0  -9   8   32.32    7.04
   0  -9   8   30.91    6.58
  -1   9  -8   83.71   10.35
  -1   9  -8   91.86    9.63
   1  -9   8   89.31   10.35
  -2   9  -8  486.66   21.47
  -2   9  -8  507.92   21.01
   2  -9   8  555.92   22.57
   2  -9   8  489.87   20.92
  -3   9  -8    3.75    4.99
  -3   9  -8    5.32    3.72
   3  -9   8    4.41    5.13
   3  -9   8    1.22    5.20
  -4   9  -8 1463.97   47.83
  -4   9  -8 1504.18   48.54
   4  -9   8 1463.56   47.90
   4  -9   8 1545.11   48.71
  -5   9  -8  384.23   18.44
  -5   9  -8  408.86   18.86
   5  -9   8  391.26   18.10
   5  -9   8  365.85   17.88
  -6   9  -8   -4.66    2.75
  -6   9  -8   -3.74    5.14
   6  -9   8   -0.77    4.57
   6  -9   8    1.61    4.90
  -7   9  -8   77.16    9.91
  -7   9  -8   82.42    7.32
   7  -9   8   83.70    8.78
   7  -9   8   78.61   10.06
  -8   9  -8  720.59   25.66
  -8   9  -8  736.03   29.44
   8  -9   8  788.71   27.02
   8  -9   8  622.30   28.60
  -9   9  -8    8.67    3.26
  -9   9  -8    1.11    6.14
   9  -9   8    8.21    4.52
 -10   9  -8    4.71    2.82
 -10   9  -8   -0.87    5.90
  10  -9   8   -1.87    3.57
 -11   9  -8    1.83    6.95
  11  -9   8    9.43    3.92
 -12   9  -8    3.35    8.03
  -8  -8   8   93.80   11.57
  -7  -8   8    2.88    7.96
  -7  -8   8    7.22    6.34
  -6  -8   8   46.40    8.74
   5   8  -8  114.57   14.78
  -5  -8   8  106.94   11.93
   4   8  -8   33.48    9.15
  -4  -8   8   36.48    7.72
   3   8  -8 1379.30   54.11
  -3  -8   8 1467.58   48.52
   2   8  -8    1.03    5.82
  -2  -8   8    2.67    5.73
  -2  -8   8   -0.42    4.63
   1   8  -8  221.90   12.51
   1   8  -8  204.05   14.50
  -1  -8   8  193.10   13.39
  -1  -8   8  215.27   13.56
   0   8  -8  657.14   24.54
   0   8  -8  613.90   25.62
   0  -8   8  601.50   24.58
   0  -8   8  638.88   25.09
  -1   8  -8  813.54   29.42
  -1   8  -8  795.36   30.27
   1  -8   8  848.62   30.31
   1  -8   8  856.01   30.18
  -2   8  -8    1.99    4.74
  -2   8  -8   -1.47    2.69
   2  -8   8    1.12    4.44
   2  -8   8    1.52    1.22
  -3   8  -8  121.33    8.81
  -3   8  -8  130.32   10.77
   3  -8   8  123.78   10.23
  -4   8  -8  695.51   26.80
  -4   8  -8  696.56   25.19
   4  -8   8  720.58   26.14
  -5   8  -8  394.69   19.01
  -5   8  -8  402.27   16.68
   5  -8   8  427.69   17.90
  -6   8  -8   20.25    4.18
  -6   8  -8   19.06    6.74
   6  -8   8   26.15    5.88
  -7   8  -8   96.80   11.54
  -7   8  -8   87.04    6.95
   7  -8   8   81.35   10.56
   7  -8   8   84.77    8.52
  -8   8  -8   46.45    9.88
  -8   8  -8   46.97    5.35
   8  -8   8   38.25    6.17
  -9   8  -8   78.68   11.26
  -9   8  -8   62.84    5.56
   9  -8   8   70.95    7.23
 -10   8  -8    8.71    7.43
 -10   8  -8    8.19    2.51
  10  -8   8    8.02    3.63
 -11   8  -8   32.37    9.63
 -12   8  -8   85.46   13.31
  -9  -7   8    0.20    6.00
  -8  -7   8   14.72    9.57
  -8  -7   8   10.93    6.82
  -7  -7   8  141.96   13.34
   6   7  -8    4.67    7.61
  -6  -7   8  -11.49    3.99
   5   7  -8  294.29   19.63
  -5  -7   8  265.99   16.34
   4   7  -8    0.96    6.15
  -4  -7   8    1.69    4.90
   3   7  -8  268.57   17.41
  -3  -7   8  298.71   17.04
  -3  -7   8  282.32   15.86
   2   7  -8  511.11   20.85
   2   7  -8  506.54   22.92
  -2  -7   8  494.66   21.49
   1   7  -8  222.49   11.93
   1   7  -8  199.36   13.78
  -1  -7   8  188.98   12.32
  -1  -7   8  201.39   12.96
   0   7  -8  713.51   27.78
   0   7  -8  763.95   26.58
   0  -7   8  711.53   27.25
   0  -7   8  745.10   27.18
  -1   7  -8   42.54    5.48
  -1   7  -8   46.68    7.32
   1  -7   8   63.35    7.93
   1  -7   8   41.93    6.03
  -2   7  -8    2.63    2.67
  -2   7  -8   -0.22    4.48
   2  -7   8    2.16    4.59
   2  -7   8    6.43    4.21
  -3   7  -8  230.77   11.20
  -3   7  -8  226.95   13.13
   3  -7   8  203.43   11.72
   3  -7   8  221.59   12.82
  -4   7  -8  101.71   10.39
  -4   7  -8  106.15    7.46
   4  -7   8  104.70    8.72
   4  -7   8  106.98   10.10
  -5   7  -8 1031.34   33.17
  -5   7  -8 1033.46   36.39
   5  -7   8  989.24   36.01
   5  -7   8 1066.65   33.80
  -6   7  -8  266.31   11.59
  -6   7  -8  242.07   15.63
   6  -7   8  260.38   15.66
   6  -7   8  260.18   12.67
  -7   7  -8  320.26   18.10
  -7   7  -8  323.09   13.04
   7  -7   8  322.30   13.95
   7  -7   8  322.97   18.46
  -8   7  -8   -0.54    6.10
  -8   7  -8    4.00    2.39
   8  -7   8    4.72    3.69
  -9   7  -8  186.26   15.67
  -9   7  -8  196.05    9.69
   9  -7   8  218.41    9.72
 -10   7  -8    9.92    1.89
 -10   7  -8    5.74    1.98
 -10   7  -8   14.86    8.21
 -11   7  -8  200.47   17.34
 -12   7  -8   16.45    8.76
  -9  -6   8   18.72    7.09
  -8  -6   8    3.79    5.64
  -8  -6   8   11.28    8.81
  -7  -6   8    5.55    5.30
   6   6  -8   17.80    7.77
  -6  -6   8   21.61    6.55
   5   6  -8  154.04   14.80
  -5  -6   8  149.03   12.22
   4   6  -8    0.50    6.11
   4   6  -8    8.41    3.89
  -4  -6   8    7.77    5.33
  -4  -6   8   20.81    6.70
   3   6  -8   -2.62    5.50
   3   6  -8   11.02    3.98
  -3  -6   8   11.81    6.23
  -3  -6   8   11.22    5.35
   2   6  -8 1453.76   47.57
   2   6  -8 1475.48   49.57
  -2  -6   8 1504.12   48.98
  -2  -6   8 1511.04   48.00
   1   6  -8  467.57   18.73
   1   6  -8  465.93   20.62
  -1  -6   8  462.47   19.95
  -1  -6   8  473.57   19.37
   0   6  -8   93.15    9.65
   0   6  -8  117.29    7.97
   0  -6   8  115.66    9.67
   0  -6   8  110.43    9.04
  -1   6  -8  386.90   15.69
  -1   6  -8  380.01   17.40
   1  -6   8  382.52   16.31
   1  -6   8  401.33   17.39
  -2   6  -8 2022.07   60.05
  -2   6  -8 1977.62   61.52
   2  -6   8 2032.81   61.40
   2  -6   8 1993.34   60.21
  -3   6  -8 1081.15   36.57
  -3   6  -8 1067.96   34.23
   3  -6   8 1109.64   36.34
   3  -6   8 1068.50   34.62
  -4   6  -8  477.74   20.50
  -4   6  -8  458.88   17.04
   4  -6   8  461.91   17.60
   4  -6   8  478.83   20.21
  -5   6  -8    3.95    5.80
  -5   6  -8    1.67    2.32
   5  -6   8    3.03    5.00
   5  -6   8    2.61    3.45
  -6   6  -8  226.28   15.32
   6  -6   8  245.84   11.24
  -7   6  -8   37.37    4.02
  -7   6  -8   48.08    8.97
   7  -6   8   34.02    7.92
   7  -6   8   46.46    5.00
  -8   6  -8   21.88    7.38
  -8   6  -8   22.70    3.01
   8  -6   8   27.55    3.68
  -9   6  -8  120.31   13.65
 -10   6  -8  146.26   15.30
 -11   6  -8   55.09   12.50
 -10  -5   8   21.63    7.80
  -9  -5   8   -3.91    5.24
  -9  -5   8   -2.32    7.90
  -8  -5   8  209.08   14.34
   7   5  -8   61.75   11.61
  -7  -5   8   45.11    7.84
   6   5  -8   25.27    8.25
  -6  -5   8   27.98    6.39
   5   5  -8  459.81   19.41
  -5  -5   8  430.85   19.98
   4   5  -8   15.17    4.69
   4   5  -8   17.78    6.94
  -4  -5   8   15.56    6.52
  -4  -5   8   16.10    5.51
   3   5  -8   25.48    4.77
   3   5  -8   26.93    6.79
  -3  -5   8   14.06    5.37
  -3  -5   8   21.13    6.49
   2   5  -8   27.04    4.86
   2   5  -8   24.32    6.23
  -2  -5   8   21.55    4.85
  -2  -5   8   24.74    5.45
   1   5  -8  199.25   10.22
   1   5  -8  195.45   12.35
  -1  -5   8  178.56   11.59
  -1  -5   8  182.45   10.85
   0   5  -8   28.81    4.56
   0   5  -8   28.93    5.97
   0  -5   8   24.13    5.62
   0  -5   8   29.01    5.25
  -1   5  -8  129.83    7.79
  -1   5  -8  121.49    9.99
   1  -5   8  118.73    9.88
   1  -5   8  123.76    8.62
  -2   5  -8 2228.75   66.11
  -2   5  -8 2261.05   68.43
   2  -5   8 2265.85   68.06
   2  -5   8 2277.58   66.43
  -3   5  -8  710.80   23.68
  -3   5  -8  707.94   26.69
   3  -5   8  826.57   29.68
   3  -5   8  676.59   26.16
  -4   5  -8  679.41   25.95
  -4   5  -8  667.76   21.92
   4  -5   8  681.54   22.36
   4  -5   8  662.63   25.78
  -5   5  -8   85.38    5.31
  -5   5  -8   95.00   10.62
   5  -5   8   89.39   10.24
   5  -5   8   80.50    6.24
  -6   5  -8  107.85   11.99
  -6   5  -8  101.65    5.43
   6  -5   8  110.97   12.05
   6  -5   8  103.80    6.36
  -7   5  -8   -0.71    1.36
  -7   5  -8   -4.71    5.85
   7  -5   8   -1.17    2.11
   7  -5   8   14.68    6.93
  -8   5  -8   49.39    9.53
  -9   5  -8  148.76   14.94
 -10   5  -8   18.33    8.33
 -11   5  -8    9.53    8.43
 -11  -4   8   14.09    6.09
 -10  -4   8  199.64   14.60
 -10  -4   8  250.56   32.71
  -9  -4   8   23.31   16.71
  -9  -4   8    5.92    5.85
  -8  -4   8   20.59    6.01
   7   4  -8    0.34    6.58
  -7  -4   8   -0.84    4.85
   6   4  -8   65.36   10.66
   6   4  -8   66.83    7.78
  -6  -4   8   56.25    7.92
   5   4  -8   10.72    4.08
   5   4  -8   13.56    6.45
  -5  -4   8   17.10    5.89
  -5  -4   8   13.31    6.03
   4   4  -8 1256.43   41.44
   4   4  -8 1265.91   44.46
  -4  -4   8 1300.14   44.18
  -4  -4   8 1308.76   42.21
   3   4  -8   19.86    5.81
   3   4  -8   16.68    3.80
  -3  -4   8   19.59    4.89
  -3  -4   8   23.93    6.32
   2   4  -8 3329.61   99.43
   2   4  -8 3247.33   97.23
  -2  -4   8 3477.44   99.21
  -2  -4   8 3381.88   97.76
   1   4  -8    0.30    4.22
   1   4  -8    4.31    2.85
  -1  -4   8    2.04    3.80
  -1  -4   8   -1.16    4.58
   0   4  -8   39.63    6.36
   0   4  -8   62.63    5.72
   0  -4   8   66.23    8.10
   0  -4   8   60.67    6.66
  -1   4  -8 1284.61   38.67
  -1   4  -8 1240.85   40.95
   1  -4   8 1230.44   38.85
   1  -4   8 1282.52   40.77
  -2   4  -8  213.96   12.94
  -2   4  -8  220.09    9.50
   2  -4   8  216.39   10.10
   2  -4   8  221.83   12.54
  -3   4  -8   59.66    4.51
  -3   4  -8   64.06    7.94
   3  -4   8   56.75    5.31
   3  -4   8   54.33    7.19
  -4   4  -8   57.99    7.84
  -4   4  -8   49.07    3.85
   4  -4   8   49.24    4.87
   4  -4   8   43.68    6.92
  -5   4  -8  586.04   18.77
  -5   4  -8  627.51   25.16
   5  -4   8  626.06   19.22
   5  -4   8  601.88   25.44
  -6   4  -8  315.90    9.90
  -6   4  -8  313.17   17.69
   6  -4   8  320.22   18.49
  -8   4  -8  127.36   13.98
  -9   4  -8   64.89   10.97
 -10   4  -8    0.63    7.02
 -11   4  -8   82.30   14.05
 -11  -3   8   15.55    6.03
 -10  -3   8  573.00   25.65
 -10  -3   8  608.19   33.20
  -9  -3   8  149.83   12.22
   8   3  -8   34.64    9.27
  -8  -3   8   32.04    6.82
   7   3  -8   66.57   10.63
  -7  -3   8   62.25    8.04
   6   3  -8  103.97   12.66
   6   3  -8   96.20    8.47
  -6  -3   8  100.59    9.57
  -6  -3   8  101.22   11.70
   5   3  -8  316.38   17.77
   5   3  -8  307.75   14.54
  -5  -3   8  312.89   17.30
  -5  -3   8  314.78   15.24
   4   3  -8   83.66    7.13
   4   3  -8   81.66    9.47
  -4  -3   8   77.94    9.42
  -4  -3   8   90.18    8.30
   3   3  -8  435.97   16.86
   3   3  -8  407.73   18.93
  -3  -3   8  437.43   17.46
  -3  -3   8  423.92   18.79
   2   3  -8  151.22   11.05
   2   3  -8  147.80    8.46
  -2  -3   8  128.24   10.14
  -2  -3   8  150.28    9.39
   1   3  -8   91.05    6.70
   1   3  -8   87.94    9.38
  -1  -3   8   88.56    7.49
  -1  -3   8   92.47    9.35
   0   3  -8 1437.85   42.88
   0   3  -8 1358.71   44.82
   0  -3   8 1390.81   44.67
   0  -3   8 1476.99   45.23
  -1   3  -8 1853.73   52.96
  -1   3  -8 1734.41   55.42
   1  -3   8 1865.59   55.56
   1  -3   8 1752.86   52.97
  -2   3  -8  382.29   17.03
  -2   3  -8  340.48   12.69
   2  -3   8  342.64   13.07
   2  -3   8  362.82   16.40
  -3   3  -8   49.92    7.70
  -3   3  -8   55.04    3.94
   3  -3   8   50.47    4.45
   3  -3   8   47.02    7.29
  -4   3  -8   30.71    6.20
  -4   3  -8   24.29    2.55
   4  -3   8   24.87    6.39
   4  -3   8   25.42    2.95
  -5   3  -8    1.51    5.30
   5  -3   8    6.50    5.59
  -6   3  -8  705.87   29.02
   6  -3   8  720.88   30.39
  -7   3  -8   22.28    7.96
  -8   3  -8    1.65    7.04
  -9   3  -8  408.70   23.91
 -10   3  -8  534.64   29.38
 -12  -2   8  169.99   17.31
 -11  -2   8  105.74   17.35
 -11  -2   8  104.05   11.24
 -10  -2   8   -3.91    8.24
 -10  -2   8    8.52    5.37
  -9  -2   8  189.89   13.17
   8   2  -8 1350.52   48.95
  -8  -2   8 1257.62   43.89
   7   2  -8   13.67    4.67
   7   2  -8   16.50    7.35
  -7  -2   8   14.86    5.69
   6   2  -8  860.47   31.08
   6   2  -8  884.37   34.32
  -6  -2   8  890.62   33.97
  -6  -2   8  906.78   31.60
   5   2  -8    7.23    5.50
   5   2  -8    8.25    3.50
  -5  -2   8   -2.66    3.30
  -5  -2   8    4.98    5.23
   4   2  -8   -0.71    4.28
   4   2  -8    5.61    3.13
  -4  -2   8   12.29    3.96
  -4  -2   8    5.28    4.94
   3   2  -8 1330.15   42.09
   3   2  -8 1391.03   44.41
  -3  -2   8 1373.55   42.53
  -3  -2   8 1313.69   43.65
   2   2  -8  227.43   10.47
   2   2  -8  210.62   12.46
  -2  -2   8  215.52   12.66
  -2  -2   8  206.14   10.78
   1   2  -8   37.17    4.54
   1   2  -8   43.16    6.90
  -1  -2   8   39.27    6.41
  -1  -2   8   42.86    4.98
   0   2  -8  107.29   10.08
   0   2  -8  100.48    6.47
   0  -2   8  108.23   10.14
   0  -2   8  100.48    7.16
  -1   2  -8   50.68    7.25
  -1   2  -8   69.02    5.05
   1  -2   8   68.41    8.88
   1  -2   8   55.61    5.44
  -2   2  -8 3145.54   88.80
  -2   2  -8 2993.95   84.53
   2  -2   8 2791.65   84.47
   2  -2   8 3069.82   88.72
  -3   2  -8    8.26    4.83
  -3   2  -8    1.32    1.50
   3  -2   8   -5.74    3.89
   3  -2   8    4.59    2.11
  -4   2  -8    3.12    4.98
   4  -2   8    1.47    4.81
  -5   2  -8   87.57   10.94
   5  -2   8   89.32   11.26
  -6   2  -8   -2.90    5.72
   6  -2   8    2.04    6.52
  -7   2  -8 1258.85   45.95
  -8   2  -8  141.79   15.23
  -9   2  -8   73.85   12.46
 -10   2  -8   -7.60    7.47
 -12  -1   8   13.98    5.78
 -11  -1   8  215.28   14.59
 -11  -1   8  212.78   21.15
 -10  -1   8  205.77   19.30
 -10  -1   8  243.90   14.84
  -9  -1   8  335.81   17.51
   8   1  -8  361.55   21.01
  -8  -1   8  357.10   18.56
   7   1  -8  409.30   21.62
  -7  -1   8  405.02   21.02
  -7  -1   8  403.58   18.29
   6   1  -8  268.33   16.34
   6   1  -8  283.51   13.76
  -6  -1   8  295.13   14.54
  -6  -1   8  250.07   18.97
   5   1  -8   74.30    9.44
   5   1  -8   62.41    6.76
  -5  -1   8   60.61    7.95
  -5  -1   8   64.30    7.52
   4   1  -8   77.51    6.77
   4   1  -8   72.92    8.62
  -4  -1   8   81.57    8.77
  -4  -1   8   72.10    7.21
   3   1  -8 4586.38  135.13
   3   1  -8 4518.81  133.41
  -3  -1   8 4827.50  135.03
  -3  -1   8 4881.34  134.02
   2   1  -8  177.06   11.59
   2   1  -8  187.74    9.47
  -2  -1   8  198.40   10.27
  -2  -1   8  184.07   12.01
   1   1  -8    1.39    2.87
   1   1  -8   -2.52    4.81
  -1  -1   8    2.50    5.24
  -1  -1   8    5.22    5.63
   0   1  -8  257.67   10.65
   0   1  -8  249.09   13.92
   0  -1   8  260.09   11.05
   0  -1   8  267.34   13.74
  -1   1  -8  744.27   27.32
   1  -1   8  785.82   27.32
   1  -1   8  765.21   24.09
  -2   1  -8  475.57   19.70
   2  -1   8  490.73   15.86
   2  -1   8  460.18   15.42
   2  -1   8  467.71   19.77
  -3   1  -8 1852.96   55.85
   3  -1   8 1739.30   56.15
   3  -1   8 1680.91   49.69
   3  -1   8 1785.12   49.93
  -4   1  -8  392.66   18.69
   4  -1   8  376.63   19.36
  -5   1  -8   34.67    7.63
   5  -1   8   17.76    7.27
  -6   1  -8  423.62   22.35
  -7   1  -8  289.42   19.05
  -8   1  -8  321.95   20.90
  -9   1  -8  405.98   27.74
 -10   1  -8   35.80   11.73
 -12   0   8    8.82    9.71
 -12   0   8    7.97    5.07
 -11   0   8  632.24   27.06
 -11   0   8  650.80   35.88
 -10   0   8   13.81    5.34
 -10   0   8   -4.09    6.92
  -9   0   8   36.95    6.68
   8   0  -8    2.25   11.58
  -8   0   8   -4.28    4.37
  -8   0   8   -0.06    4.38
   7   0  -8  719.65   28.96
  -7   0   8  671.60   25.90
  -7   0   8  672.00   26.56
  -7   0   8  655.10   27.82
   6   0  -8  747.68   29.92
  -6   0   8  818.01   28.42
  -6   0   8  761.90   29.51
  -6   0   8  802.73   29.13
   5   0  -8  472.76   20.53
  -5   0   8  505.38   20.20
  -5   0   8  488.24   20.47
  -5   0   8  489.15   19.50
   4   0  -8   76.73    8.52
  -4   0   8   64.89    7.15
  -4   0   8   68.19    7.79
  -4   0   8   69.11    8.42
   3   0  -8 1177.43   40.07
  -3   0   8 1248.76   40.18
  -3   0   8 1281.48   39.40
  -3   0   8 1284.52   40.05
   2   0  -8 1176.42   38.08
  -2   0   8 1133.12   36.62
  -2   0   8 1233.00   37.62
  -2   0   8 1157.18   37.83
   1   0  -8    6.14    5.05
  -1   0   8    5.75    3.42
  -1   0   8    2.03    4.93
   0   0  -8  225.34   13.08
   0   0   8  263.28   13.43
   0   0   8  249.85   10.67
   0   0   8  261.29   11.30
  -1   0  -8  370.70   16.67
   1   0   8  405.64   17.16
   1   0   8  354.86   13.20
   1   0   8  377.25   13.78
  -2   0  -8  377.07   17.02
   2   0   8  372.29   12.83
   2   0   8  358.84   17.27
   2   0   8  374.21   12.64
  -3   0  -8  810.83   29.39
   3   0   8  779.40   23.30
   3   0   8  808.95   30.30
   3   0   8  797.76   23.46
  -4   0  -8  154.72   12.56
   4   0   8  157.43   15.55
  -5   0  -8  198.21   15.02
   5   0   8  194.15   15.74
  -6   0  -8  247.03   17.41
  -7   0  -8   94.84   12.53
  -8   0  -8   92.24   13.79
  -9   0  -8    2.06    7.61
 -13   1   8  103.22   11.03
 -12   1   8  292.51   17.17
 -12   1   8  257.99   22.65
 -11   1   8   53.72   12.02
 -11   1   8   54.91    8.57
 -10   1   8  639.78   26.36
 -10   1   8  628.19   30.91
  -9   1   8   -1.64    4.36
   8  -1  -8   18.17    7.17
  -8   1   8   17.70    5.33
  -8   1   8   19.02    7.18
  -8   1   8    2.97    5.19
   7  -1  -8   62.77    8.97
  -7   1   8   55.62    7.29
  -7   1   8   69.30    9.40
  -7   1   8   50.94    7.72
   6  -1  -8 1535.07   49.56
  -6   1   8 1469.47   48.79
  -6   1   8 1516.45   48.72
  -6   1   8 1505.66   48.08
   5  -1  -8 5570.26  161.25
  -5   1   8 5590.56  161.01
  -5   1   8 5690.89  161.12
  -5   1   8 5707.19  160.60
   4  -1  -8  709.99   25.35
  -4   1   8  692.57   24.86
  -4   1   8  709.38   24.72
  -4   1   8  653.84   24.77
   3  -1  -8   60.64    7.02
  -3   1   8   61.72    7.00
  -3   1   8   59.38    6.81
  -3   1   8   48.28    6.51
  -2   1   8  148.37   10.18
  -2   1   8  126.96    8.42
  -2   1   8  150.59    9.59
   1  -1  -8  265.99   13.16
  -1   1   8  266.46   12.06
  -1   1   8  257.78   13.09
   0  -1  -8   49.88    6.81
   0   1   8   64.95    8.12
   0   1   8   61.83    6.01
   0   1   8   59.98    5.65
  -1  -1  -8   46.21    6.50
   1   1   8   51.23    7.04
   1   1   8   45.27    5.01
   1   1   8   53.35    4.77
  -2  -1  -8  428.05   18.60
   2   1   8  436.77   14.63
   2   1   8  419.97   19.19
   2   1   8  423.28   14.32
  -3  -1  -8  174.59   12.39
   3   1   8  154.79    6.63
   3   1   8  151.37   12.63
   3   1   8  173.57    6.67
  -4  -1  -8    4.54    5.80
   4   1   8    0.33    5.70
  -6  -1  -8  222.51   16.83
  -7  -1  -8  198.53   17.21
  -8  -1  -8    9.97    8.10
  -9  -1  -8   -0.65    8.30
 -13   2   8   39.47   10.20
 -12   2   8   11.69    5.53
 -11   2   8    5.67    5.04
 -11   2   8   15.70    8.90
 -10   2   8   84.86   10.02
 -10   2   8   82.67   12.51
  -9   2   8   12.12    5.66
   8  -2  -8    2.09    5.84
  -8   2   8   -5.03    5.15
  -8   2   8    7.66    5.17
  -8   2   8    5.11    4.85
   7  -2  -8 1427.75   47.59
  -7   2   8 1427.00   47.01
  -7   2   8 1400.41   46.94
  -7   2   8 1427.78   46.47
   6  -2  -8  281.50   15.28
  -6   2   8  370.38   15.92
  -6   2   8  311.93   15.49
  -6   2   8  284.76   15.39
   5  -2  -8   85.99    8.45
  -5   2   8   84.61    7.97
  -5   2   8   77.32    8.46
  -5   2   8   79.30    8.29
   4  -2  -8 2133.77   65.43
  -4   2   8 2183.40   65.27
  -4   2   8 2227.20   65.86
  -4   2   8 2207.46   66.31
   3  -2  -8  276.36   14.42
  -3   2   8  286.20   13.41
  -3   2   8  286.15   13.48
  -3   2   8  281.80   13.06
   2  -2  -8 1178.48   37.38
  -2   2   8 1178.99   37.23
  -2   2   8 1211.16   39.01
  -2   2   8 1140.27   37.36
   1  -2  -8  108.31    8.95
  -1   2   8  116.35    8.87
  -1   2   8  110.17    7.77
   0  -2  -8  116.99    7.45
   0  -2  -8  124.83    9.42
   0   2   8  110.85    9.32
  -1  -2  -8   32.09    4.15
  -1  -2  -8   39.20    6.27
   1   2   8   29.44    4.14
   1   2   8   40.26    7.04
  -2  -2  -8   13.99    5.44
   2   2   8    6.72    2.90
   2   2   8    7.51    5.41
  -3  -2  -8   73.12    9.09
   3   2   8   52.15    8.36
   3   2   8   54.95    4.57
   3   2   8   63.65    4.74
  -4  -2  -8  151.94   13.56
   4   2   8  153.31   14.46
   4   2   8  141.35    5.67
   4   2   8  144.21    5.75
  -5  -2  -8    9.00    7.06
  -6  -2  -8   18.98    8.05
  -7  -2  -8   -4.84    7.10
  -8  -2  -8    5.05    8.35
 -13   3   8    9.04    8.24
 -13   3   8    8.03    6.41
 -12   3   8   27.06    7.16
 -12   3   8   24.01    9.21
 -11   3   8  120.48   12.01
 -11   3   8  125.95   15.24
 -10   3   8   16.97    5.74
 -10   3   8    1.43    6.31
  -9   3   8  372.49   18.68
  -9   3   8  379.00   19.41
   8  -3  -8   88.84   11.62
  -8   3   8   90.08   10.25
  -8   3   8   98.75    9.93
   7  -3  -8 1527.57   48.72
  -7   3   8 1516.03   48.09
  -7   3   8 1411.15   47.87
  -7   3   8 1469.01   48.76
   6  -3  -8   18.08    5.57
  -6   3   8   11.55    4.72
  -6   3   8   22.77    5.61
   5  -3  -8  232.54   12.33
  -5   3   8  250.30   13.36
  -5   3   8  255.77   12.60
  -5   3   8  234.25   12.76
   4  -3  -8  892.42   29.13
  -4   3   8  823.51   30.03
  -4   3   8  856.46   29.93
   3  -3  -8    3.08    3.20
   3  -3  -8   -0.51    3.24
  -3   3   8    4.19    3.58
  -3   3   8    4.47    4.03
   2  -3  -8  213.91   11.05
   2  -3  -8  213.52   11.27
  -2   3   8  238.04   11.82
   1  -3  -8  680.94   23.54
   1  -3  -8  693.67   23.53
  -1   3   8  702.65   23.82
  -1   3   8  564.38   22.51
   0  -3  -8    4.69    4.18
   0  -3  -8    2.24    3.02
   0   3   8    7.50    4.57
   0   3   8    4.00    3.34
  -1  -3  -8   76.46    8.93
   1   3   8   82.05    6.68
   1   3   8   89.64    9.65
  -2  -3  -8  159.14   11.97
  -2  -3  -8  154.59    8.24
   2   3   8  144.55    8.12
   2   3   8  154.94   12.67
  -3  -3  -8   32.03    4.19
  -3  -3  -8   34.35    7.72
   3   3   8   31.41    3.96
   3   3   8   32.58    8.32
  -4  -3  -8   44.10   13.31
  -4  -3  -8   42.36    4.38
   4   3   8   41.22    3.94
  -5  -3  -8   73.38   10.82
  -6  -3  -8  555.02   27.65
  -7  -3  -8   26.16    9.40
  -8  -3  -8   20.67   10.27
 -13   4   8   25.42    6.86
 -13   4   8   20.09   10.33
 -12   4   8  387.28   20.59
 -12   4   8  392.57   23.89
 -11   4   8   39.30    9.14
 -11   4   8   41.89    7.74
 -10   4   8   53.47    7.95
 -10   4   8   63.03   10.67
  -9   4   8  418.50   20.13
  -9   4   8  436.41   20.61
   8  -4  -8    5.01    5.36
  -8   4   8    1.21    4.87
  -8   4   8   -1.69    4.54
   7  -4  -8   52.10    7.74
  -7   4   8   56.37    7.36
  -7   4   8   41.60    6.72
  -7   4   8   41.97    7.10
   6  -4  -8   51.81    6.72
  -6   4   8   37.66    6.38
  -6   4   8   35.28    6.08
   5  -4  -8  319.15   14.23
   5  -4  -8  303.38   15.60
  -5   4   8  313.90   15.71
  -5   4   8  332.66   15.78
   4  -4  -8  578.22   20.96
   4  -4  -8  589.60   23.01
  -4   4   8  582.27   23.07
  -4   4   8  620.43   21.06
   3  -4  -8    3.91    3.75
   3  -4  -8    0.15    3.45
  -3   4   8    4.59    3.98
  -3   4   8   -4.53    3.58
   2  -4  -8  396.65   15.94
   2  -4  -8  394.08   16.89
  -2   4   8  423.96   18.12
  -2   4   8  413.74   17.05
   1  -4  -8   79.88    8.10
   1  -4  -8   94.21    7.86
  -1   4   8   86.99    8.51
  -1   4   8   82.30    7.40
   0  -4  -8    4.84    3.45
   0  -4  -8    8.07    4.86
   0   4   8    3.89    4.84
   0   4   8    1.80    3.69
  -1  -4  -8    8.21    5.31
  -1  -4  -8   -1.73    3.17
   1   4   8    0.21    5.07
   1   4   8    3.68    3.52
  -2  -4  -8  295.75   16.03
  -2  -4  -8  278.30   12.41
   2   4   8  267.94   16.64
   2   4   8  268.11   12.17
  -3  -4  -8  408.24   17.71
  -3  -4  -8  414.59   20.45
   3   4   8  386.84   21.15
  -4  -4  -8    1.11    2.62
  -4  -4  -8    3.53    6.20
   4   4   8   -2.74    2.28
  -5  -4  -8   14.70    2.71
  -5  -4  -8   11.33    7.44
   5   4   8   27.38    3.07
  -6  -4  -8   -5.99    7.09
  -7  -4  -8  249.28   20.21
 -13   5   8  416.10   21.84
 -13   5   8  390.72   24.06
[truncated: 236,378 more chars]
